# Supplementary material for: The effects of caloric restriction on adipose tissue and metabolic health are sex- and age-dependent
Source: eLife journal article supplement (doi:10.7554/elife.88080), 2023-04-18
Supplement: fig2-figsupp2-data1 [file Figure 2-figure supplement 2_Source_Data.xlsx]

## Sheet: Fig 2-fig supp 2A-C
Figure 2-figure supplement 2A - adipose masses (% body mass)
	Group	M AL Young	M AL Young	M AL Young	M AL Young	M AL Young	M AL Young	M AL Young	M AL Young	M AL Young	M AL Young	M AL Young	M AL Young	M AL Young	M AL Young	M AL Young	M AL Young	M AL Young	M AL Young	M AL Young	M AL Young	M AL Young	M AL Young	M AL Young	M AL Young	M AL Young	M AL Young	M AL Young	M AL Young	M AL Young	M AL Young	M AL Young	M AL Young	M AL Young	M AL Young	M AL Young	M CR Young	M CR Young	M CR Young	M CR Young	M CR Young	M CR Young	M CR Young	M CR Young	M CR Young	M CR Young	M CR Young	M CR Young	M CR Young
	Study	Ben_CR	Ben_CR	Ben_CR	Ben_CR	Ben_CR	Ben_CR	Ben_CR	Ben_CR	Ben_CR	Exp054_CRTC	Exp054_CRTC	Exp054_CRTC	Exp054_CRTC	Exp054_CRTC	Exp054_CRTC	Exp046_Del1_WT	Exp046_Del1_WT	Exp046_Del1_WT	Exp046_Del1_WT	Exp046_Del1_WT	Exp046_Del1_WT	Exp046_Del1_WT	Exp064_CR_PETCT	Exp064_CR_PETCT	Exp064_CR_PETCT	Exp064_CR_PETCT	Exp064_CR_PETCT	Exp064_CR_PETCT	Exp064_CR_PETCT							Ben_CR	Ben_CR	Ben_CR	Ben_CR	Ben_CR	Ben_CR	Ben_CR	Ben_CR	Ben_CR	Exp054_CRTC	Exp054_CRTC	Exp054_CRTC	Exp054_CRTC
	Mouse ID	1/ 4750	6/ 4790	7/ 4791	24/ 5075	25/ 5096	26/ 5097	29/ 5100	58/ 5816	60/ 5818	78	86	94	170	172	173	448110//291//3	448207//300//3	448210//303//11	469240//345//3	476354//356//1	486641//382//3	486642//383//4	0m C1	1m C1	0m C2	1m C3	3m C3	4585 C4	4587 C4						Total N	2/ 4751	8/ 4792	9/ 4793	22/ 5073	23/ 5074	27/ 5098	28/ 5099	57/ 5815	59/ 5817	79	87	89	90
	iWAT	2.82477	2.35278	1.72549	1.52313	1.47176	1.32923	1.27599	1.81667	1.78495	2.00906	0.788476	2.17347	0.772152	0.593985	0.783898	0.423488	1.16981	0.840816	1.52555	1.17842	1.21132	1.77891	1.62792	1.01548	1.46906	0.915476	1.52453	0.850206	1.62359						29	1.11638	1.38494	1.44167	1.02283	1.08482	0.630573	1.09694	1.06373	1.36538	1.16229	1.54696	1.14391	1.12942
	mWAT	1.54985	1.11667	1.30392	0.572954	1.56478	1.39385	1.17563	1.21	0.777778	1.14426	0.443518	1.65306	1.1097	0.37218	0.262712	0.601423	0.69434	0.420408	1.17518	0.236515	1.04151	0.959184	0.414841	0.443096	0.382063	0.457143	0.309057	0.248148	0.4						29	0.62069	0.669456	0.554167	0.456621	0.549107	0.60828	0.913265	0.20098	0.663462	0.808784	0.698142	0.465867	0.790111
	pWAT	1.33837	0.977778	0.457516	0.352313		0.433846	0.616487	0.456667	0.853047														1.19859	0.598326	0.274888	0.390873	1.50755	0.395885	0.654225						15	0.0689655	0.246862	0.1375	0.310502	0.196429	0.328025	0.193878	0.171569	0.3125
	pcWAT	0.060423		0.0228758	0.0533808	0.00996678	0.0307692	0.0394265	0.06	0.046595	0.0793051	0.0265353	0.0578231	0.109705	0.116541	0.131356																				14	0.0517241	0.0334728	0.0541667	0.0410959	0.0446429	0.00636943	0.0357143	0.0343137	0.0240385	0.0374933	0.0652938	0.0230627	0.0581677
	BAT	0.555891	0.752778	0.810458	0.44484		0.547692	0.516129	0.51	0.340502	0.566465	0.299469	0.534014	0.303797	0.221805	0.300847	0.274021	0.290566	0.187755	0.321168	0.377593	0.366038	0.428571	0.329329	0.457741	0.853812	0.314286	0.435094	0.293827	0.28838						28	0.418103	0.698745	0.308333	0.237443	0.308036	0.334395	0.515306	0.519608	0.413462	0.557043	0.381718	0.613469	0.479884
Figure 2-figure supplement 2B - tissue masses (g)
	Group	M AL Young	M AL Young	M AL Young	M AL Young	M AL Young	M AL Young	M AL Young	M AL Young	M AL Young	M AL Young	M AL Young	M AL Young	M AL Young	M AL Young	M AL Young	M AL Young	M AL Young	M AL Young	M AL Young	M AL Young	M AL Young	M AL Young	M AL Young	M AL Young	M AL Young	M AL Young	M AL Young	M AL Young	M AL Young	M AL Young	M AL Young	M AL Young	M AL Young	M AL Young	M AL Young	M CR Young	M CR Young	M CR Young	M CR Young	M CR Young	M CR Young	M CR Young	M CR Young	M CR Young	M CR Young	M CR Young	M CR Young	M CR Young
	Study	Ben_CR	Ben_CR	Ben_CR	Ben_CR	Ben_CR	Ben_CR	Ben_CR	Ben_CR	Ben_CR	Exp054_CRTC	Exp054_CRTC	Exp054_CRTC	Exp054_CRTC	Exp054_CRTC	Exp054_CRTC	Exp046_Del1_WT	Exp046_Del1_WT	Exp046_Del1_WT	Exp046_Del1_WT	Exp046_Del1_WT	Exp046_Del1_WT	Exp046_Del1_WT	Exp064_CR_PETCT	Exp064_CR_PETCT	Exp064_CR_PETCT	Exp064_CR_PETCT	Exp064_CR_PETCT	Exp064_CR_PETCT	Exp064_CR_PETCT							Ben_CR	Ben_CR	Ben_CR	Ben_CR	Ben_CR	Ben_CR	Ben_CR	Ben_CR	Ben_CR	Exp054_CRTC	Exp054_CRTC	Exp054_CRTC	Exp054_CRTC
	Mouse ID	1/ 4750	6/ 4790	7/ 4791	24/ 5075	25/ 5096	26/ 5097	29/ 5100	58/ 5816	60/ 5818	78	86	94	170	172	173	448110//291//3	448207//300//3	448210//303//11	469240//345//3	476354//356//1	486641//382//3	486642//383//4	0m C1	1m C1	0m C2	1m C3	3m C3	4585 C4	4587 C4						Total N	2/ 4751	8/ 4792	9/ 4793	22/ 5073	23/ 5074	27/ 5098	28/ 5099	57/ 5815	59/ 5817	79	87	89	90
	Liver	1.704	1.764	0.893	1.163	1.493	1.425	1.393	1.507	1.187	1.082	0.995	1.241	0.976	1.005	0.857	0.604	0.987	0.861	1.132	0.441	0.994	1.142	1.0139	0.9337	0.7448	0.8453	0.9231	0.8695	0.9595						29	0.791	0.826	0.854	0.754	0.75	0.8	0.733	0.727	0.77	0.756	0.542	0.828	0.774
	Pancreas	0.208	0.163	0.187	0.113	0.213	0.203	0.115	0.15	0.151	not weighed	not weighed	not weighed	not weighed	not weighed	not weighed	0.272	0.132	0.118	0.156	0.214	0.174	0.118	0.133	0.1063	0.1533	0.1129	0.1286	0.1153	0.1335						23	0.125	0.096	0.103	0.092	0.109	0.097	0.076	0.114	0.107	not weighed	not weighed	not weighed	not weighed
	Kidneys (both)	0.426	0.372	0.464	0.346	0.397	0.377	0.36	0.363	0.345	not weighed	not weighed	not weighed	not weighed	not weighed	not weighed	0.409	0.255	0.273	0.31	0.36	0.325	0.305	0.3785	0.323	0.3373	0.3535	0.3242	0.3297	0.3377						23	0.275	0.304	0.275	0.251	0.251	0.255	0.223	0.262	0.254	not weighed	not weighed	not weighed	not weighed
	Gastroc	0.287	0.323	0.326	0.296	0.285	0.272	0.303	0.353	0.325	not weighed	not weighed	not weighed	not weighed	not weighed	not weighed	not weighed	not weighed	not weighed	not weighed	not weighed	not weighed	not weighed	0.3304	0.3347	0.252	0.2943	0.3073	0.3414	0.3565						16	0.266	0.279	0.284	0.22	0.25	0.266	0.212	0.231	0.227	not weighed	not weighed	not weighed	not weighed
	Heart	0.132	0.171	0.212	0.122	0.149	0.159	0.162	0.134	0.126	not weighed	not weighed	not weighed	not weighed	not weighed	not weighed	0.188	0.149	0.154	0.119	0.155	0.156	0.126	0.1468	0.1706	0.1204	0.1576	0.121	0.1538	0.1364						23	0.116	0.145	0.142	0.092	0.114	0.112	0.105	0.131	0.114	not weighed	not weighed	not weighed	not weighed
	Spleen	0.07	0.056	0.133	0.064	0.065	0.063	0.069	0.07	0.066	0.07	0.078	0.076	0.054	0.062	0.055	0.139	0.068	0.056	0.068	0.105	0.074	0.074	0.0599	0.0572	0.0563	0.0632	0.0206	0.0529	0.0514						29	0.043	0.046	0.039	0.05	0.052	0.063	0.036	0.038	0.045	0.035	0.063	0.05	0.038
	Thymus	0.042	0.09	0.123	0.063	0.047	0.05	0.041	0.082	0.107	not weighed	not weighed	not weighed	not weighed	not weighed	not weighed	0.049	0.038	0.006	0.068	0.04	0.018	0.047	0.071	0.0971	0.0329	0.0541	0.0935	0.0602	0.105						23	0.025	0.057	0.073	0.06	0.05	0.048	0.021	0.028	0.028	not weighed	not weighed	not weighed	not weighed
	Adrenal Glands (both)	0.003	0.017	0.013	0.006	0.005	0.004	0.004	0.008	0.005	not weighed	not weighed	not weighed	not weighed	not weighed	not weighed	0.002	0.004	0.001	0.004	0.006	0.003	0.005	0.0125	0.0117	0.0095	X	0.0088	0.0118	0.0051						22	0.004	0.009	0.01	0.006	0.007	0.007	0.004	0.006	0.008	not weighed	not weighed	not weighed	not weighed
Figure 2-figure supplement 2C - tissue masses (% body mass)
	Group	M AL Young	M AL Young	M AL Young	M AL Young	M AL Young	M AL Young	M AL Young	M AL Young	M AL Young	M AL Young	M AL Young	M AL Young	M AL Young	M AL Young	M AL Young	M AL Young	M AL Young	M AL Young	M AL Young	M AL Young	M AL Young	M AL Young	M AL Young	M AL Young	M AL Young	M AL Young	M AL Young	M AL Young	M AL Young	M AL Young	M AL Young	M AL Young	M AL Young	M AL Young	M AL Young	M CR Young	M CR Young	M CR Young	M CR Young	M CR Young	M CR Young	M CR Young	M CR Young	M CR Young	M CR Young	M CR Young	M CR Young	M CR Young
	Study	Ben_CR	Ben_CR	Ben_CR	Ben_CR	Ben_CR	Ben_CR	Ben_CR	Ben_CR	Ben_CR	Exp054_CRTC	Exp054_CRTC	Exp054_CRTC	Exp054_CRTC	Exp054_CRTC	Exp054_CRTC	Exp046_Del1_WT	Exp046_Del1_WT	Exp046_Del1_WT	Exp046_Del1_WT	Exp046_Del1_WT	Exp046_Del1_WT	Exp046_Del1_WT	Exp064_CR_PETCT	Exp064_CR_PETCT	Exp064_CR_PETCT	Exp064_CR_PETCT	Exp064_CR_PETCT	Exp064_CR_PETCT	Exp064_CR_PETCT							Ben_CR	Ben_CR	Ben_CR	Ben_CR	Ben_CR	Ben_CR	Ben_CR	Ben_CR	Ben_CR	Exp054_CRTC	Exp054_CRTC	Exp054_CRTC	Exp054_CRTC
	Mouse ID	1/ 4750	6/ 4790	7/ 4791	24/ 5075	25/ 5096	26/ 5097	29/ 5100	58/ 5816	60/ 5818	78	86	94	170	172	173	448110//291//3	448207//300//3	448210//303//11	469240//345//3	476354//356//1	486641//382//3	486642//383//4	0m C1	1m C1	0m C2	1m C3	3m C3	4585 C4	4587 C4						Total N	2/ 4751	8/ 4792	9/ 4793	22/ 5073	23/ 5074	27/ 5098	28/ 5099	57/ 5815	59/ 5817	79	87	89	90
	Liver	5.14804	4.9	2.9183	4.13879	4.96013	4.38462	4.99283	5.02333	4.25448	4.0861	3.7718	4.22109	4.11814	3.7782	3.63136	2.14947	3.72453	3.51429	4.13139	1.82988	3.75094	3.88435	3.58269	3.90669	3.33991	3.35437	3.4834	3.57819	3.37852						29	3.40948	3.45607	3.55833	3.44292	3.34821	2.54777	3.7398	3.56373	3.70192	4.04928	2.72225	3.81919	3.75182
	Pancreas	0.628399	0.452778	0.611111	0.402135	0.707641	0.624615	0.412186	0.5	0.541219							0.967972	0.498113	0.481633	0.569343	0.887967	0.656604	0.401361	0.469965	0.44477	0.687444	0.448016	0.485283	0.474486	0.47007						23	0.538793	0.401674	0.429167	0.420091	0.486607	0.308917	0.387755	0.558824	0.514423
	Kidneys (both)	1.28701	1.03333	1.51634	1.23132	1.31894	1.16	1.29032	1.21	1.23656							1.45552	0.962264	1.11429	1.13139	1.49378	1.22642	1.03741	1.33746	1.35146	1.51256	1.40278	1.2234	1.35679	1.18908						23	1.18534	1.27197	1.14583	1.14612	1.12054	0.812102	1.13776	1.28431	1.22115
	Gastroc	0.867069	0.897222	1.06536	1.05338	0.946844	0.836923	1.08602	1.17667	1.16487														1.16749	1.40042	1.13004	1.16786	1.15962	1.40494	1.25528						16	1.14655	1.16736	1.18333	1.00457	1.11607	0.847134	1.08163	1.13235	1.09135
	Heart	0.398792	0.475	0.69281	0.434164	0.495017	0.489231	0.580645	0.446667	0.451613							0.669039	0.562264	0.628571	0.434307	0.643154	0.588679	0.428571	0.518728	0.713808	0.53991	0.625397	0.456604	0.632922	0.480282						23	0.5	0.606695	0.591667	0.420091	0.508929	0.356688	0.535714	0.642157	0.548077
	Spleen	0.21148	0.155556	0.434641	0.227758	0.215947	0.193846	0.247312	0.233333	0.236559	0.26435	0.295679	0.258503	0.227848	0.233083	0.233051	0.494662	0.256604	0.228571	0.248175	0.435685	0.279245	0.251701	0.211661	0.239331	0.252466	0.250794	0.0777358	0.217695	0.180986						29	0.185345	0.192469	0.1625	0.228311	0.232143	0.200637	0.183673	0.186275	0.216346	0.187467	0.316424	0.230627	0.184198
	Thymus	0.126888	0.25	0.401961	0.224199	0.156146	0.153846	0.146953	0.273333	0.383513							0.174377	0.143396	0.0244898	0.248175	0.165975	0.0679245	0.159864	0.250883	0.406276	0.147534	0.214683	0.35283	0.247737	0.369718						23	0.107759	0.238494	0.304167	0.273973	0.223214	0.152866	0.107143	0.137255	0.134615
	Adrenal Glands (both)	0.00906344	0.0472222	0.0424837	0.0213523	0.0166113	0.0123077	0.0143369	0.0266667	0.0179211							0.00711744	0.0150943	0.00408163	0.0145985	0.0248963	0.0113208	0.0170068	0.0441696	0.048954	0.0426009		0.0332075	0.0485597	0.0179577						22	0.0172414	0.0376569	0.0416667	0.0273973	0.03125	0.022293	0.0204082	0.0294118	0.0384615
Figure 2-figure supplement 1C - tissue masses (g) used for calculating the % body mass data above.
	Group	M AL Young	M AL Young	M AL Young	M AL Young	M AL Young	M AL Young	M AL Young	M AL Young	M AL Young	M AL Young	M AL Young	M AL Young	M AL Young	M AL Young	M AL Young	M AL Young	M AL Young	M AL Young	M AL Young	M AL Young	M AL Young	M AL Young	M AL Young	M AL Young	M AL Young	M AL Young	M AL Young	M AL Young	M AL Young	M AL Young	M AL Young	M AL Young	M AL Young	M AL Young	M AL Young	M CR Young	M CR Young	M CR Young	M CR Young	M CR Young	M CR Young	M CR Young	M CR Young	M CR Young	M CR Young	M CR Young	M CR Young	M CR Young
	Study	Ben_CR	Ben_CR	Ben_CR	Ben_CR	Ben_CR	Ben_CR	Ben_CR	Ben_CR	Ben_CR	Exp054_CRTC	Exp054_CRTC	Exp054_CRTC	Exp054_CRTC	Exp054_CRTC	Exp054_CRTC	Exp046_Del1_WT	Exp046_Del1_WT	Exp046_Del1_WT	Exp046_Del1_WT	Exp046_Del1_WT	Exp046_Del1_WT	Exp046_Del1_WT	Exp064_CR_PETCT	Exp064_CR_PETCT	Exp064_CR_PETCT	Exp064_CR_PETCT	Exp064_CR_PETCT	Exp064_CR_PETCT	Exp064_CR_PETCT							Ben_CR	Ben_CR	Ben_CR	Ben_CR	Ben_CR	Ben_CR	Ben_CR	Ben_CR	Ben_CR	Exp054_CRTC	Exp054_CRTC	Exp054_CRTC	Exp054_CRTC
	Mouse ID	1/ 4750	6/ 4790	7/ 4791	24/ 5075	25/ 5096	26/ 5097	29/ 5100	58/ 5816	60/ 5818	78	86	94	170	172	173	448110//291//3	448207//300//3	448210//303//11	469240//345//3	476354//356//1	486641//382//3	486642//383//4	0m C1	1m C1	0m C2	1m C3	3m C3	4585 C4	4587 C4						Total N	2/ 4751	8/ 4792	9/ 4793	22/ 5073	23/ 5074	27/ 5098	28/ 5099	57/ 5815	59/ 5817	79	87	89	90
	Body mass	33.1	36	30.6	28.1	30.1	32.5	27.9	30	27.9	26.48	26.38	29.4	23.7	26.6	23.6	28.1	26.5	24.5	27.4	24.1	26.5	29.4	28.3	23.9	22.3	25.2	26.5	24.3	28.4							23.2	23.9	24	21.9	22.4	31.4	19.6	20.4	20.8	18.67	19.91	21.68	20.63
	iWAT	0.935	0.847	0.528	0.428	0.443	0.432	0.356	0.545	0.498	0.532	0.208	0.639	0.183	0.158	0.185	0.119	0.31	0.206	0.418	0.284	0.321	0.523	0.4607	0.2427	0.3276	0.2307	0.404	0.2066	0.4611						29	0.259	0.331	0.346	0.224	0.243	0.198	0.215	0.217	0.284	0.217	0.308	0.248	0.233
	mWAT	0.513	0.402	0.399	0.161	0.471	0.453	0.328	0.363	0.217	0.303	0.117	0.486	0.263	0.099	0.062	0.169	0.184	0.103	0.322	0.057	0.276	0.282	0.1174	0.1059	0.0852	0.1152	0.0819	0.0603	0.1136						29	0.144	0.16	0.133	0.1	0.123	0.191	0.179	0.041	0.138	0.151	0.139	0.101	0.163
	pWAT	0.443	0.352	0.14	0.099	not weighed	0.141	0.172	0.137	0.238	not weighed	not weighed	not weighed	not weighed	not weighed	not weighed	not weighed	not weighed	not weighed	not weighed	not weighed	not weighed	not weighed	0.3392	0.143	0.0613	0.0985	0.3995	0.0962	0.1858						15	0.016	0.059	0.033	0.068	0.044	0.103	0.038	0.035	0.065	not weighed	not weighed	not weighed	not weighed
	pcWAT	0.02	not weighed	0.007	0.015	0.003	0.01	0.011	0.018	0.013	0.021	0.007	0.017	0.026	0.031	0.031	not weighed	not weighed	not weighed	not weighed	not weighed	not weighed	not weighed	not weighed	not weighed	not weighed	not weighed	not weighed	not weighed	not weighed						14	0.012	0.008	0.013	0.009	0.01	0.002	0.007	0.007	0.005	0.007	0.013	0.005	0.012
	BAT	0.184	0.271	0.248	0.125	0.081*	0.178	0.144	0.153	0.095	0.15	0.079	0.157	0.072	0.059	0.071	0.077	0.077	0.046	0.088	0.091	0.097	0.126	0.0932	0.1094	0.1904	0.0792	0.1153	0.0714	0.0819						28	0.097	0.167	0.074	0.052	0.069	0.105	0.101	0.106	0.086	0.104	0.076	0.133	0.099
Figure 2-figure supplement 2 - tissue masses (g) or gut length - not included in the figure
	Group	M AL Young	M AL Young	M AL Young	M AL Young	M AL Young	M AL Young	M AL Young	M AL Young	M AL Young	M AL Young	M AL Young	M AL Young	M AL Young	M AL Young	M AL Young	M AL Young	M AL Young	M AL Young	M AL Young	M AL Young	M AL Young	M AL Young	M AL Young	M AL Young	M AL Young	M AL Young	M AL Young	M AL Young	M AL Young	M AL Young	M AL Young	M AL Young	M AL Young	M AL Young	M AL Young	M CR Young	M CR Young	M CR Young	M CR Young	M CR Young	M CR Young	M CR Young	M CR Young	M CR Young	M CR Young	M CR Young	M CR Young	M CR Young
	Study	Ben_CR	Ben_CR	Ben_CR	Ben_CR	Ben_CR	Ben_CR	Ben_CR	Ben_CR	Ben_CR	Exp054_CRTC	Exp054_CRTC	Exp054_CRTC	Exp054_CRTC	Exp054_CRTC	Exp054_CRTC	Exp046_Del1_WT	Exp046_Del1_WT	Exp046_Del1_WT	Exp046_Del1_WT	Exp046_Del1_WT	Exp046_Del1_WT	Exp046_Del1_WT	Exp064_CR_PETCT	Exp064_CR_PETCT	Exp064_CR_PETCT	Exp064_CR_PETCT	Exp064_CR_PETCT	Exp064_CR_PETCT	Exp064_CR_PETCT							Ben_CR	Ben_CR	Ben_CR	Ben_CR	Ben_CR	Ben_CR	Ben_CR	Ben_CR	Ben_CR	Exp054_CRTC	Exp054_CRTC	Exp054_CRTC	Exp054_CRTC
	Mouse ID	1/ 4750	6/ 4790	7/ 4791	24/ 5075	25/ 5096	26/ 5097	29/ 5100	58/ 5816	60/ 5818	78	86	94	170	172	173	448110//291//3	448207//300//3	448210//303//11	469240//345//3	476354//356//1	486641//382//3	486642//383//4	0m C1	1m C1	0m C2	1m C3	3m C3	4585 C4	4587 C4						Total N	2/ 4751	8/ 4792	9/ 4793	22/ 5073	23/ 5074	27/ 5098	28/ 5099	57/ 5815	59/ 5817	79	87	89	90
	Gonad	Not weighed	Not weighed	Not weighed	0.178	0.146	0.144	0.142	0.162	0.122	not weighed	not weighed	not weighed	not weighed	not weighed	not weighed	not weighed	not weighed	not weighed	not weighed	not weighed	not weighed	not weighed	0.166	0.1509	0.1156	0.155	0.1679	0.1648	0.1781						13	Not weighed	Not weighed	Not weighed	0.112	0.15	0.135	0.128	0.131	0.156	not weighed	not weighed	not weighed	not weighed
	Gut length (cm)	36	35.2	38.2	34.2	34.9	33	32.6	35.9	35.9	not recorded	not recorded	not recorded	not recorded	not recorded	not recorded	not recorded	not recorded	not recorded	not recorded	not recorded	not recorded	not recorded	not recorded	not recorded	not recorded	not recorded	not recorded	not recorded	not recorded						9	38.8	39.6	not recorded	34.3	36.9	36	34.8	29.4	34.8	not recorded	not recorded	not recorded	not recorded
Figure 2-figure supplement 2 - tissue masses (% body mass) - not included in the figure
	Group	M AL Young	M AL Young	M AL Young	M AL Young	M AL Young	M AL Young	M AL Young	M AL Young	M AL Young	M AL Young	M AL Young	M AL Young	M AL Young	M AL Young	M AL Young	M AL Young	M AL Young	M AL Young	M AL Young	M AL Young	M AL Young	M AL Young	M AL Young	M AL Young	M AL Young	M AL Young	M AL Young	M AL Young	M AL Young	M AL Young	M AL Young	M AL Young	M AL Young	M AL Young	M AL Young	M CR Young	M CR Young	M CR Young	M CR Young	M CR Young	M CR Young	M CR Young	M CR Young	M CR Young	M CR Young	M CR Young	M CR Young	M CR Young
	Study	Ben_CR	Ben_CR	Ben_CR	Ben_CR	Ben_CR	Ben_CR	Ben_CR	Ben_CR	Ben_CR	Exp054_CRTC	Exp054_CRTC	Exp054_CRTC	Exp054_CRTC	Exp054_CRTC	Exp054_CRTC	Exp046_Del1_WT	Exp046_Del1_WT	Exp046_Del1_WT	Exp046_Del1_WT	Exp046_Del1_WT	Exp046_Del1_WT	Exp046_Del1_WT	Exp064_CR_PETCT	Exp064_CR_PETCT	Exp064_CR_PETCT	Exp064_CR_PETCT	Exp064_CR_PETCT	Exp064_CR_PETCT	Exp064_CR_PETCT							Ben_CR	Ben_CR	Ben_CR	Ben_CR	Ben_CR	Ben_CR	Ben_CR	Ben_CR	Ben_CR	Exp054_CRTC	Exp054_CRTC	Exp054_CRTC	Exp054_CRTC
	Mouse ID	1/ 4750	6/ 4790	7/ 4791	24/ 5075	25/ 5096	26/ 5097	29/ 5100	58/ 5816	60/ 5818	78	86	94	170	172	173	448110//291//3	448207//300//3	448210//303//11	469240//345//3	476354//356//1	486641//382//3	486642//383//4	0m C1	1m C1	0m C2	1m C3	3m C3	4585 C4	4587 C4						Total N	2/ 4751	8/ 4792	9/ 4793	22/ 5073	23/ 5074	27/ 5098	28/ 5099	57/ 5815	59/ 5817	79	87	89	90
	Gonad				0.633452	0.48505	0.443077	0.508961	0.54	0.437276														0.586572	0.631381	0.518386	0.615079	0.633585	0.678189	0.627113						13				0.511416	0.669643	0.429936	0.653061	0.642157	0.75
	Gut length (ratio of length:body mass)	1.08761	0.977778	1.24837	1.21708	1.15947	1.01538	1.16846	1.19667	1.28674																										9	1.67241	1.6569		1.56621	1.64732	1.1465	1.77551	1.44118	1.67308
[truncated: 92 more columns]
