# Supplementary material for: The effects of caloric restriction on adipose tissue and metabolic health are sex- and age-dependent
Source: eLife journal article supplement (doi:10.7554/elife.88080), 2023-04-18
Supplement: supp [file Figure 1-figure supplement 1_Source_Data.xlsx]

## Sheet: Fig 1-Fig Supp 1
Figure 1-figure supplement 1B – Mouse CR studies by sex (absolute number of total studies published since 2003)
Year of publication	Male only	Female only	Male & Female separate	Male & Female combined	N/A	Total
2003	12	5	0	1	0	18
2004	29	9	1	3	1	43
2005	49	15	1	3	1	69
2006	68	24	3	4	1	100
2007	89	31	8	7	4	139
2008	115	36	9	7	8	175
2009	132	42	12	9	13	208
2010	159	47	13	9	19	247
2011	196	56	18	10	23	303
2012	227	66	20	10	32	355
2013	269	75	27	12	38	421
2014	304	82	31	13	39	469
2015	341	93	38	14	43	529
2016	374	104	41	16	51	586
2017	412	114	48	20	55	649
2018	436	119	49	23	56	683
2019	447	128	51	23	56	705
2020	475	134	55	27	58	749
2021	496	141	59	27	58	781
Figure 1-figure supplement 1B – Human CR studies by sex (absolute number of total studies published since 2003)
Year of publication	Male only	Female only	Male & Female separate	Male & Female combined	N/A	Total
2003	4	2	0	11	1	18
2004	7	5	0	16	1	29
2005	11	13	1	23	3	51
2006	17	15	2	45	3	82
2007	21	27	3	63	3	117
2008	28	36	3	98	4	169
2009	34	56	3	136	4	233
2010	42	73	5	165	5	290
2011	48	100	8	198	7	361
2012	51	120	11	243	9	434
2013	64	136	17	302	10	529
2014	73	152	21	360	10	616
2015	88	177	23	401	12	701
2016	102	198	35	462	14	811
2017	111	210	42	510	15	888
2018	116	217	45	546	15	939
2019	121	224	48	585	16	994
2020	128	243	48	628	19	1066
2021	130	248	50	654	19	1101
