# Supplementary material for: The effects of caloric restriction on adipose tissue and metabolic health are sex- and age-dependent
Source: eLife journal article supplement (doi:10.7554/elife.88080), 2023-04-18
Supplement: supp [file Figure 1_Source_Data.xlsx]

## Sheet: Figures 1A-D
Figure 1A – Mouse CR studies by sex (% of total studies published since 2003)
Year of publication	Male only	Female only	Male & Female separate	Male & Female combined	N/A
2003	66.6667	27.7778	0	5.55556	0
2004	67.4419	20.9302	2.32558	6.97674	2.32558
2005	71.0145	21.7391	1.44928	4.34783	1.44928
2006	68	24	3	4	1
2007	64.0288	22.3022	5.7554	5.03597	2.8777
2008	65.7143	20.5714	5.14286	4	4.57143
2009	63.4615	20.1923	5.76923	4.32692	6.25
2010	64.3725	19.0283	5.26316	3.64372	7.69231
2011	64.6865	18.4818	5.94059	3.30033	7.59076
2012	63.9437	18.5915	5.6338	2.8169	9.01408
2013	63.8955	17.8147	6.4133	2.85036	9.02613
2014	64.8188	17.484	6.60981	2.77186	8.31557
2015	64.4612	17.5803	7.18336	2.6465	8.12854
2016	63.8225	17.7474	6.99659	2.73038	8.70307
2017	63.4823	17.5655	7.39599	3.08166	8.47458
2018	63.836	17.4231	7.17423	3.3675	8.19912
2019	63.4043	18.156	7.23404	3.26241	7.94326
2020	63.4179	17.8905	7.34312	3.60481	7.74366
2021	63.5083	18.0538	7.55442	3.45711	7.42638
Figure 1B – Proportion of "Male & Female separate" mouse CR studies that do or do not find sex differences
	Number	Percentage
Data indicate sex difference(s)	48	81.3559
Data do not indicate sex difference(s)	7	11.8644
Not comparable	4	6.77966
Total	59	100
Figure 1C – Human CR studies by sex (% of total studies published since 2003)
Year of publication	Male only	Female only	Male & Female separate	Male & Female combined	N/A
2003	22.2222	11.1111	0	61.1111	5.55556
2004	24.1379	17.2414	0	55.1724	3.44828
2005	21.5686	25.4902	1.96078	45.098	5.88235
2006	20.7317	18.2927	2.43902	54.878	3.65854
2007	17.9487	23.0769	2.5641	53.8462	2.5641
2008	16.568	21.3018	1.77515	57.9882	2.36686
2009	14.5923	24.0343	1.28755	58.3691	1.71674
2010	14.4828	25.1724	1.72414	56.8966	1.72414
2011	13.2964	27.7008	2.21607	54.8476	1.93906
2012	11.7512	27.6498	2.53456	55.9908	2.07373
2013	12.0983	25.7089	3.21361	57.0888	1.89036
2014	11.8506	24.6753	3.40909	58.4416	1.62338
2015	12.5535	25.2496	3.28103	57.204	1.71184
2016	12.5771	24.4143	4.31566	56.9667	1.72626
2017	12.5	23.6486	4.72973	57.4324	1.68919
2018	12.3536	23.1097	4.79233	58.147	1.59744
2019	12.173	22.5352	4.82897	58.8531	1.60966
2020	12.0075	22.7955	4.50281	58.9118	1.78236
2021	11.8074	22.525	4.54133	59.4005	1.7257
Figure 1D – Proportion of "Male & Female separate" human CR studies that do or do not find sex differences
	Number	Percentage
Data indicate sex difference(s)	30	57.6923
Data do not indicate sex difference(s)	13	25
Not comparable	9	17.3077
Total	52	100
Figure 1-figure supplement 1B – Mouse CR studies by sex (absolute number of total studies published since 2003)
Year of publication	Male only	Female only	Male & Female separate	Male & Female combined	N/A	Total
2003	12	5	0	1	0	18
2004	29	9	1	3	1	43
2005	49	15	1	3	1	69
2006	68	24	3	4	1	100
2007	89	31	8	7	4	139
2008	115	36	9	7	8	175
2009	132	42	12	9	13	208
2010	159	47	13	9	19	247
2011	196	56	18	10	23	303
2012	227	66	20	10	32	355
2013	269	75	27	12	38	421
2014	304	82	31	13	39	469
2015	341	93	38	14	43	529
2016	374	104	41	16	51	586
2017	412	114	48	20	55	649
2018	436	119	49	23	56	683
2019	447	128	51	23	56	705
2020	475	134	55	27	58	749
2021	496	141	59	27	58	781
Figure 1-figure supplement 1B – Human CR studies by sex (absolute number of total studies published since 2003)
Year of publication	Male only	Female only	Male & Female separate	Male & Female combined	N/A	Total
2003	4	2	0	11	1	18
2004	7	5	0	16	1	29
2005	11	13	1	23	3	51
2006	17	15	2	45	3	82
2007	21	27	3	63	3	117
2008	28	36	3	98	4	169
2009	34	56	3	136	4	233
2010	42	73	5	165	5	290
2011	48	100	8	198	7	361
2012	51	120	11	243	9	434
2013	64	136	17	302	10	529
2014	73	152	21	360	10	616
2015	88	177	23	401	12	701
2016	102	198	35	462	14	811
2017	111	210	42	510	15	888
2018	116	217	45	546	15	939
2019	121	224	48	585	16	994
2020	128	243	48	628	19	1066
2021	130	248	50	654	19	1101
