# Supplementary material for: The effects of caloric restriction on adipose tissue and metabolic health are sex- and age-dependent
Source: eLife journal article supplement (doi:10.7554/elife.88080), 2023-04-18
Supplement: supp [file Figure 2-figure supplement 1_Source_Data.xlsx]

## Sheet: Fig 2-fig supp 1A-B
Figure 2-figure supplement 1A-B. Blank cells indicate that measurements were not recorded for this mouse and timepoint.
	Group	M AL Young	M AL Young	M AL Young	M AL Young	M AL Young	M AL Young	M AL Young	M AL Young	M AL Young	M AL Young	M AL Young	M AL Young	M AL Young	M AL Young	M AL Young	M AL Young	M AL Young	M AL Young	M AL Young	M AL Young	M AL Young	M AL Young	M AL Young	M AL Young	M AL Young	M AL Young	M AL Young	M AL Young	M AL Young	M AL Young	M AL Young	M AL Young	M AL Young	M AL Young	M AL Young	M AL Young	M AL Young	M AL Young	M AL Young	M AL Young	M AL Young	M AL Young	M AL Young	M AL Young	M AL Young	M AL Young	M AL Young	M AL Young
	Study	Ben_CR	Ben_CR	Ben_CR	Ben_CR	Ben_CR	Ben_CR	Ben_CR	Ben_CR	Ben_CR	Exp054_CRTC	Exp054_CRTC	Exp054_CRTC	Exp054_CRTC	Exp054_CRTC	Exp054_CRTC	Exp054_CRTC	Exp054_CRTC	Exp054_CRTC	Exp054_CRTC	Exp054_CRTC	Exp054_CRTC	Exp054_CRTC	Exp054_CRTC	Exp054_CRTC	Exp054_CRTC	Exp054_CRTC	Exp054_CRTC	Exp054_CRTC	Exp046_Del1_WT	Exp046_Del1_WT	Exp046_Del1_WT	Exp046_Del1_WT	Exp046_Del1_WT	Exp046_Del1_WT	Exp046_Del1_WT	Exp064_CR_PETCT	Exp064_CR_PETCT	Exp064_CR_PETCT	Exp064_CR_PETCT	Exp064_CR_PETCT	Exp064_CR_PETCT	Exp064_CR_PETCT
	Mouse ID	1/ 4750	6/ 4790	7/ 4791	24/ 5075	25/ 5096	26/ 5097	29/ 5100	58/ 5816	60/ 5818	78	86	88	94	96	170	172	173	292	300	313	315	A91	153	156	158	197	198	201	448110//291//3	448207//300//3	448210//303//11	469240//345//3	476354//356//1	486641//382//3	486642//383//4	0m C1	1m C1	0m C2	1m C3	3m C3	4585 C4	4587 C4
Figure 2-figure supplement 1A – fat mass (% body mass)	Week 0	5.65117	17.471	8.96293	4.14655	0.81104	5.1287	3.89171	6.05314	12.4227	6.29108	4.1498	4.07724	9.89076	4.76068	2.45344	3.28897	3.79386	5.87246	2.31646	3.85714	4.85214	8.21688	3.57561	5.12245	5.62667	7.74556	7.23014	8.57203	2.10409	7.25	6.20426	6.44574	7.875	4.53125	7.73529	9.96498	4.51883	9.85306	6.38211	9.77872	5.32687	3.72359
Figure 2-figure supplement 1A – fat mass (% body mass)	Week 1																													4.80303	9.26693	6.33891	7.96538	3.80909	6.42366	10.3406	10.645	4.46281	5.33824	8.26446	9.78723
Figure 2-figure supplement 1A – fat mass (% body mass)	Week 2	13.7012	25.933	9.65727	6.48229	4.51168	8.37819	8.6109	9.29941	10.9981	6.89373	6.96981	5.2643	13.7028	4.61153	7.92821	5.24542	5.8892	12.1399	5.2996	8.67045	8.33708	11.4076	9.039	12.4676	13.8804	14.375	10.7469	14.684	8.85091	12.4904	11.0082	7.83908	8.53913	6.93411	13.5544	12.8052	6.00408	4.86911	8.16327	14.8543	5.41601	5.08544
Figure 2-figure supplement 1A – fat mass (% body mass)	Week 3																													11.195	15.4873	11.5977	7.81081	10.113	8.07491	14.8369	15.5188	8.5451	2.875	7.7821	15.6126
Figure 2-figure supplement 1A – fat mass (% body mass)	Week 4										14.8295	7.42143	8.31379	19.0283	6.68726	9.28516	7.15714	9.104	13.5211	7.53994	11.5203	15.5428	15.9012							11.2128	14.3875	12.3043	10.2687	10.3173	9.23843	17.2109	20.0376	12.3732	6.62234	10.9157	18.5603
Figure 2-figure supplement 1A – fat mass (% body mass)	Week 5																													12.3986	13.3172	11.581	14.3333	11.3492	10.1825	18.6513	21.8636	11.1199	9.8731	10.635	8.16187
Figure 2-figure supplement 1A – fat mass (% body mass)	Week 6										24.4789	12.0546	15.8938	26.0646	10.318	11.7764	7.16917	10.5042												10.7319	13.4201	11.8164	15.305	12.3115	11.6321	18.7238
Figure 2-figure supplement 1B – lean mass (% body mass)	Week 0	72.5086	62.8152	69.2823	74.3371	78.1614	73.7534	76.0575	73.2807	67.0746	70.2488	70.5344	74.0366	67.1303	69.7949	74.6518	73.9202	72.8421	70.6299	74.8101	72.5238	73.1984	68.5799	73.4878	71.1633	71.2356	70.0995	68.778	69.1281	73.1896	70.8197	71.5702	71.5	69.317	72.0742	68.5735	67.537	72.0251	68.6531	69.6382	67.7277	74.2682	74.397
Figure 2-figure supplement 1B – lean mass (% body mass)	Week 1																													73.0303	68.9044	70.8452	69.6154	55.8818	69.6641	67.3659	66.6679	70.5661	71.3529	69.1157	67.8468
Figure 2-figure supplement 1B – lean mass (% body mass)	Week 2	66.0211	57.3249	69.1927	71.7827	74.121	70.8668	71.2701	71.073	68.632	70.9219	49.0371	69.0912	66.216	72.3308	69.2197	71.0549	70.0923	65.1678	72.2186	69.3864	68.7491	66.2899	76.3881	75.4443	81.8896	70.6293	72.5768	72.6883	69.7382	65.1418	66.6543	69.046	70.8565	69.4302	65.1368	65.8127	72.1306	71.7225	69.6367	64.3898	71.6086	73.8731
Figure 2-figure supplement 1B – lean mass (% body mass)	Week 3																													68.0106	62.9745	64.9688	69.6834	67.0335	67.397	63.9716	62.3515	69.4196	71.5114	68.179	64.7787
Figure 2-figure supplement 1B – lean mass (% body mass)	Week 4										62.9318	68.1786	68.4034	60.4664	69.8456	67.7695	70.4321	68.624	65.0141	71.5216	68.1255	66.0669	64.4609							66.5319	64.1144	64.5968	67.347	67.5382	67.8007	62.9082	59.5298	66.1449	69.7074	66.5402	62.2374
Figure 2-figure supplement 1B – lean mass (% body mass)	Week 5																													64.945	64.8881	64.6957	63.7376	65.5556	66.4234	59.0263	59.6201	66.1161	68.3198	65.8061	59.536
Figure 2-figure supplement 1B – lean mass (% body mass)	Week 6										62.5718	72.2176	65.1781	58.8673	68.0805	73.4262	77.0451	75.3263												67.5471	64.5725	66.8594	63.9929	67.0123	66.1238	62.6469
Figure 2A – body mass (g) – absolute	Week 0	26.03	27.6	25.36	23.61	23.55	26.03	23.64	25.97	24.27	21.3	24.7	24.6	23.8	23.4	24.7	26.3	22.8	25.56	23.7	25.2	25.7	22.04	20.5	24.5	22.5	23.11	24.55	23.74	26.9	24.4	23.5	25.8	22.4	25.6	27.2	25.7	23.9	24.5	24.6	23.5	23.71	22.72
Figure 2A – body mass (g) – absolute	Week 1	27.3	29.6	26.7	24.9	25	27.7	25.5	26.8	24.6	21.44	26.14	25.59	24.16	22.89				26.5	24.6	25.2	26.6	21.1	21.91	24.77	23.81	24.2	25.6	24.5	26.4	25.1	23.9	26	22	26.2	27.6	26.2	24.2	20.4	24.2	23.5	Xmas	Xmas
Figure 2A – body mass (g) – absolute	Week 2	28.45	33.12	26.26	25.13	26.11	28.61	26.06	27.12	25.95	22.02	26.17	27.62	24.63	23.94	25.63	27.3	24.91	28.6	24.7	26.4	26.7	23.8	21.54	23.18	19.74	23.2	24.1	23.1	27.5	26.1	24.3	26.1	23	25.8	28.5	26.7	24.5	19.1	24.5	25.4	25.24	24.58
Figure 2A – body mass (g) – absolute	Week 3	30.2	33.47	26.95	27	29.3	30.8	26.6	28.1	27.4	24.13	28.5	28	26.43	25.41	24.88	27.8	24.61	28.8	25.5	27.1	26.9	24.1							28.2	27.5	25.6	25.9	23.9	26.7	28.2	29.3	25.5	17.6	25.7	25.3	X	X
Figure 2A – body mass (g) – absolute	Week 4	31.9	34	27.6	27.2	27.6	30.5	26	28.5	27.8	26.4	28	29	28.3	25.9	25.6	28	25	28.4	25.04	27.1	26.9	24.3							28.2	27.1	25.3	26.8	24.9	28.1	29.4	31.9	27.6	18.8	26.1	25.7	X	X
Figure 2A – body mass (g) – absolute	Week 5	33.3	35.2	29.4	26.8	29.8	32.8	26.4	29.9	28	27.38	27.9	29.67	29.52	26.78	25.4	29.1	25												29.1	26.8	25.3	28.2	25.2	27.4	30.4	30.8	26.7	19.7	26.3	27.8	X	X
Figure 2A – body mass (g) – absolute	Week 6	33.1	36.2	30.6	27.5	30.1	32.5	27.9	30	27.9	26.48	26.38	29.2	29.4	26.1	23.7	26.6	23.6												27.6	26.9	25.6	28.2	24.4	27.94	29.62	28.3	23.9	22.3	25.2	26.5	24.3	28.4
Figure 2C – fat mass (g) – absolute	Week 0	1.471	4.822	2.273	0.979	0.191	1.335	0.92	1.572	3.015	1.34	1.025	1.003	2.354	1.114	0.606	0.865	0.865	1.501	0.549	0.972	1.247	1.811	0.733	1.255	1.266	1.79	1.775	2.035	0.566	1.769	1.458	1.663	1.764	1.16	2.104	2.561	1.08	2.414	1.57	2.298	1.263	0.846
Figure 2C – fat mass (g) – absolute	Week 1																													1.268	2.326	1.515	2.071	0.838	1.683	2.854	2.789	1.08	1.089	2	2.3	X	X
Figure 2C – fat mass (g) – absolute	Week 2	3.898	8.589	2.536	1.629	1.178	2.397	2.244	2.522	2.854	1.518	1.824	1.454	3.375	1.104	2.032	1.432	1.467	3.472	1.309	2.289	2.226	2.715	1.947	2.89	2.74	3.335	2.59	3.392	2.434	3.26	2.675	2.046	1.964	1.789	3.863	3.419	1.471	0.93	2	3.773	1.367	1.25
Figure 2C – fat mass (g) – absolute	Week 3																													3.157	4.259	2.969	2.023	2.417	2.156	4.184	4.547	2.179	0.506	2	3.95	X	X
Figure 2C – fat mass (g) – absolute	Week 4										3.915	2.078	2.411	5.385	1.732	2.377	2.004	2.276	3.84	1.888	3.122	4.181	3.864							3.162	3.899	3.113	2.752	2.569	2.596	5.06	6.392	3.415	1.245	2.849	4.77	X	X
Figure 2C – fat mass (g) – absolute	Week 5																													3.608	3.569	2.93	4.042	2.86	2.79	5.67	6.734	2.969	1.945	2.797	2.269	X	X
Figure 2C – fat mass (g) – absolute	Week 6										6.482	3.18	4.641	7.663	2.693	2.791	1.907	2.479												2.962	3.61	3.025	4.316	3.004	3.25	5.546
Figure 2E – lean mass (g) – absolute	Week 0	18.874	17.337	17.57	17.551	18.407	19.198	17.98	19.031	16.279	14.963	17.422	18.213	15.977	16.332	18.439	19.441	16.608	18.053	17.73	18.276	18.812	15.115	15.065	17.435	16.028	16.2	16.885	16.411	19.688	17.28	16.819	18.447	15.527	18.451	18.652	17.357	17.214	16.82	17.131	15.916	17.609	16.903
Figure 2E – lean mass (g) – absolute	Week 1																													19.28	17.295	16.932	18.1	12.294	18.252	18.593	17.467	17.077	14.556	16.726	15.944	X	X
Figure 2E – lean mass (g) – absolute	Week 2	18.783	18.986	18.17	18.039	19.353	20.275	18.573	19.275	17.81	15.617	12.833	19.083	16.309	17.316	17.741	19.398	17.46	18.638	17.838	18.318	18.356	15.777	16.454	17.488	16.165	16.386	17.491	16.791	19.178	17.002	16.197	18.021	16.297	17.913	18.564	17.572	17.672	13.699	17.061	16.355	18.074	18.158
Figure 2E – lean mass (g) – absolute	Week 3																													19.179	17.318	16.632	18.048	16.021	17.995	18.04	18.269	17.702	12.586	17.522	16.389	X	X
Figure 2E – lean mass (g) – absolute	Week 4										16.614	19.09	19.837	17.112	18.09	17.349	19.721	17.156	18.464	17.909	18.462	17.772	15.664							18.762	17.375	16.343	18.049	16.817	19.052	18.495	18.99	18.256	13.105	17.367	15.995	X	X
Figure 2E – lean mass (g) – absolute	Week 5																													18.899	17.39	16.368	17.974	16.52	18.2	17.944	18.363	17.653	13.459	17.307	16.551	X	X
Figure 2E – lean mass (g) – absolute	Week 6										16.569	19.051	19.032	17.307	17.769	17.402	20.494	17.777												18.643	17.37	17.116	18.046	16.351	18.475	18.556
[truncated: 164 more columns]

## Sheet: Fig 2-fig supp 1C
Figure 2-figure supplement 1C - adipose masses (g)
	Group	M AL Young	M AL Young	M AL Young	M AL Young	M AL Young	M AL Young	M AL Young	M AL Young	M AL Young	M AL Young	M AL Young	M AL Young	M AL Young	M AL Young	M AL Young	M AL Young	M AL Young	M AL Young	M AL Young	M AL Young	M AL Young	M AL Young	M AL Young	M AL Young	M AL Young	M AL Young	M AL Young	M AL Young	M AL Young	M AL Young	M AL Young	M AL Young	M AL Young	M AL Young	M AL Young	M CR Young	M CR Young	M CR Young	M CR Young	M CR Young	M CR Young	M CR Young	M CR Young	M CR Young	M CR Young	M CR Young	M CR Young	M CR Young
	Study	Ben_CR	Ben_CR	Ben_CR	Ben_CR	Ben_CR	Ben_CR	Ben_CR	Ben_CR	Ben_CR	Exp054_CRTC	Exp054_CRTC	Exp054_CRTC	Exp054_CRTC	Exp054_CRTC	Exp054_CRTC	Exp046_Del1_WT	Exp046_Del1_WT	Exp046_Del1_WT	Exp046_Del1_WT	Exp046_Del1_WT	Exp046_Del1_WT	Exp046_Del1_WT	Exp064_CR_PETCT	Exp064_CR_PETCT	Exp064_CR_PETCT	Exp064_CR_PETCT	Exp064_CR_PETCT	Exp064_CR_PETCT	Exp064_CR_PETCT							Ben_CR	Ben_CR	Ben_CR	Ben_CR	Ben_CR	Ben_CR	Ben_CR	Ben_CR	Ben_CR	Exp054_CRTC	Exp054_CRTC	Exp054_CRTC	Exp054_CRTC
	Mouse ID	1/ 4750	6/ 4790	7/ 4791	24/ 5075	25/ 5096	26/ 5097	29/ 5100	58/ 5816	60/ 5818	78	86	94	170	172	173	448110//291//3	448207//300//3	448210//303//11	469240//345//3	476354//356//1	486641//382//3	486642//383//4	0m C1	1m C1	0m C2	1m C3	3m C3	4585 C4	4587 C4						Total N	2/ 4751	8/ 4792	9/ 4793	22/ 5073	23/ 5074	27/ 5098	28/ 5099	57/ 5815	59/ 5817	79	87	89	90
	Body mass	33.1	36	30.6	28.1	30.1	32.5	27.9	30	27.9	26.48	26.38	29.4	23.7	26.6	23.6	28.1	26.5	24.5	27.4	24.1	26.5	29.4	28.3	23.9	22.3	25.2	26.5	24.3	28.4							23.2	23.9	24	21.9	22.4	31.4	19.6	20.4	20.8	18.67	19.91	21.68	20.63
	gWAT	0.913	1.918	0.828	0.576	0.64	0.872	0.65	0.863	0.766	0.761	0.309	0.95	0.288	0.268	0.288	0.352	0.486	0.334	0.575	0.456	0.443	0.674	0.7898	0.4394	0.2505	0.5166	0.833	0.3926	0.509						29	0.218	0.232	0.238	0.328	0.295	0.342	0.226	0.195	0.344	0.204	0.29	0.232	0.209
	iWAT	0.935	0.847	0.528	0.428	0.443	0.432	0.356	0.545	0.498	0.532	0.208	0.639	0.183	0.158	0.185	0.119	0.31	0.206	0.418	0.284	0.321	0.523	0.4607	0.2427	0.3276	0.2307	0.404	0.2066	0.4611						29	0.259	0.331	0.346	0.224	0.243	0.198	0.215	0.217	0.284	0.217	0.308	0.248	0.233
	mWAT	0.513	0.402	0.399	0.161	0.471	0.453	0.328	0.363	0.217	0.303	0.117	0.486	0.263	0.099	0.062	0.169	0.184	0.103	0.322	0.057	0.276	0.282	0.1174	0.1059	0.0852	0.1152	0.0819	0.0603	0.1136						29	0.144	0.16	0.133	0.1	0.123	0.191	0.179	0.041	0.138	0.151	0.139	0.101	0.163
	pWAT	0.443	0.352	0.14	0.099	not weighed	0.141	0.172	0.137	0.238	not weighed	not weighed	not weighed	not weighed	not weighed	not weighed	not weighed	not weighed	not weighed	not weighed	not weighed	not weighed	not weighed	0.3392	0.143	0.0613	0.0985	0.3995	0.0962	0.1858						15	0.016	0.059	0.033	0.068	0.044	0.103	0.038	0.035	0.065	not weighed	not weighed	not weighed	not weighed
	pcWAT	0.02	not weighed	0.007	0.015	0.003	0.01	0.011	0.018	0.013	0.021	0.007	0.017	0.026	0.031	0.031	not weighed	not weighed	not weighed	not weighed	not weighed	not weighed	not weighed	not weighed	not weighed	not weighed	not weighed	not weighed	not weighed	not weighed						14	0.012	0.008	0.013	0.009	0.01	0.002	0.007	0.007	0.005	0.007	0.013	0.005	0.012
	BAT	0.184	0.271	0.248	0.125	0.081*	0.178	0.144	0.153	0.095	0.15	0.079	0.157	0.072	0.059	0.071	0.077	0.077	0.046	0.088	0.091	0.097	0.126	0.0932	0.1094	0.1904	0.0792	0.1153	0.0714	0.0819						28	0.097	0.167	0.074	0.052	0.069	0.105	0.101	0.106	0.086	0.104	0.076	0.133	0.099
[truncated: 92 more columns]
