# Supplementary material for: The effects of caloric restriction on adipose tissue and metabolic health are sex- and age-dependent
Source: eLife journal article supplement (doi:10.7554/elife.88080), 2023-04-18
Supplement: supp [file Figure 2-figure supplement 3_Source_Data.xlsx]

## Sheet: Fig 2-fig supp 3B
Figure 2-figure supplement 3B - mWAT histomorphometry
	AL Male					AL Female						CR male					CR Female
Cell number (based on order of counting per mouse)	Mouse_ID_78	Mouse_ID_94	Mouse_ID_170	Mouse_ID_172	Mouse_ID_173	Mouse_ID_80	Mouse_ID_81	Mouse_ID_97	Mouse_ID_92	Mouse_ID_174	Mouse_ID_177	Mouse_ID_79	Mouse_ID_87	Mouse_ID_89	Mouse_ID_95	Mouse_ID_171	Mouse_ID_83	Mouse_ID_99	Mouse_ID_175	Mouse_ID_176	Mouse_ID_178	Mouse_ID_179
1	4704.25	1800.97	1451.08	1254.49	1518.05	821.612	2014.97	1289.02	746.844	1220.93	1141.29	1025.17	1239.73	1185.01	635.458	1464.59	1053.85	298.932	3731.16	667.063	685.999	1874.21
2	2461.63	2510.09	612.763	358.246	1356.82	783.74	2332.43	1568.6	287.515	475.34	694.353	544.4	685.721	1523.76	914.619	899.582	351.145	192.837	1874.21	708.137	1077.52	791.677
3	2414.01	1940.62	144.941	1401.65	1371.02	415.331	1688.75	913.088	504.857	572.664	1348.05	257.023	2496.16	915.872	893.456	1070.98	509.174	386.649	444.848	1318.95	1054.55	647.71
4	2408.03	2733.69	1087.82	811.03	953.465	1200.46	2094.06	848.623	1304.19	1369.91	1643.64	456.961	1532.81	879.115	827.181	1417.94	720.529	426.191	1185.7	1318.95	1067.5	1632.78
5	2051.31	1274.81	770.096	576.562	1447.46	981.451	3178.12	971.148	170.838	1189.19	753.666	1215.08	531.59	1660.91	1327.44	1693.21	499.288	335.829	278.744	817.435	675.139	1021.55
6	3429.44	3856.74	1273.56	1021.13	1604.38	1206.03	3065.9	1017.93	850.433	1225.8	961.123	1448.44	972.958	799.891	490.377	953.743	436.912	430.229	984.096	1612.45	669.848	2058.28
7	2711.97	2518.16	1393.02	384.7	1729.69	1201.72	2951.87	738.072	796.689	1200.46	1238.2	888.583	479.656	359.777	998.994	1295.56	540.083	502.769	845.142	1257.83	825.093	1329.53
8	2394.11	1487.7	1303.91	454.177	1031.02	1721.05	1696.41	1338.72	1060.26	1569.43	1210.77	2641.66	859.761	311.742	760.349	707.719	790.563	1063.32	1229.01	1274.4	831.497	393.332
9	874.52	2306.81	1919.04	349.613	1145.74	1163.57	5807.53	1366.71	665.81	446.519	1159.11	1203.39	1099.1	505.971	1817.4	1633.06	1299.32	434.406	1365.87	780.12	907.101	708.694
10	3653.74	2319.48	736.262	581.714	842.636	1969.86	2788.41	1190.58	767.589	942.744	1955.1	1524.46	802.258	1000.39	540.779	465.037	421.736	743.641	694.632	2349.27	1948.98	449.164
11	2547.54	3972.72	688.505	958.895	1465.01	1423.1	3155.99	981.729	614.99	1100.49	1027.12	1051.76	714.403	927.568	1111.77	366.739	528.249	175.851	739.047	993.007	964.604	750.185
12	2170.5	2129.7	1214.25	1311.99	1157.44	835.396	4743.38	1055.8	834.282	780.956	1035.19	1660.91	1203.94	770.513	2141.54	1147.97	639.078	383.029	1212.02	968.084	1914.31	609.282
13	2882.53	2091.27	261.2	1721.19	1050.65	1553.56	2385.05	919.214	665.532	925.618	809.359	793.208	658.71	831.497	899.721	850.99	285.009	419.647	601.903	1422.68	3327.94	916.568
14	2022.91	4333.34	1406.67	1128.06	875.077	800.448	2312.38	1289.02	337.918	774.969	1416	728.744	1274.67	736.262	1495.91	579.625	560.411	538.134	226.531	1724.67	950.959	568.765
15	2999.49	2728.68	630.306	973.514	2366.54	1504.69	1326.75	728.604	523.654	967.945	1114.56	1809.19	1548.82	1555.92	1348.47	360.752	940.656	272.617	448.607	2368.35	1060.81	405.863
16	683.493	2218.81	1292.36	860.318	1544.51	1371.02	1949.95	1206.73	614.434	627.939	932.441	1197.82	742.249	793.347	970.312	265.934	266.074	745.591	632.673	954.579	5322.86	195.483
17	3647.62	3862.17	436.355	1360.02	1614.82	813.954	2267.68	857.812	536.881	769.539	795.018	1644.2	625.572	217.481	1943.13	700.062	728.326	523.375	868.812	924.365	1691.12	753.666
18	3261.8	2641.24	1240.42	397.509	1357.8	1004.28	1211.74	429.393	1576.11	1654.08	845.838	760.349	582.549	387.763	502.63	561.525	205.09	577.537	705.631	876.609	1598.11	513.629
19	1769.37	1614.68	995.374	2180.24	1489.37	1028.23	2819.88	1234.44	1150.06	956.667	673.886	789.867	900.417	788.892	867.28	633.091	598.143	529.641	366.182	1966.52	922.277	644.369
20	2159.36	1265.35	749.071	480.213	1277.88	1188.49	2180.8	1744.59	836.231	1056.36	1110.24	668.038	736.401	678.481	409.205	861.571	832.193	849.597	994.26	1765.89	1407.36	416.862
21	4195.91	2766.97	671.937	1745.98	1287.62	1348.05	1460.83	1011.94	704.517	1322.99	860.875	863.799	806.714	1149.78	1102.44	1922.66	1119.43	355.739	167.079	1641.13	984.514	407.812
22	2978.05	2904.25	642.698	1410.98	2148.08	1697.11	2163.54	1352.09	342.791	1080.72	991.336	598.7	878.697	1086.57	1233.18	262.314	297.819	257.58	510.148	756.451	1083.79	1029.21
23	3134.54	2006.06	790.284	846.395	2482.52	2139.87	2658.93	1586	1320.62	1800.97	1251.84	1251.98	678.341	553.45	1815.73	981.172	451.392	465.315	960.705	1519.59	1021.55	516.414
24	2438.94	2038.78	804.347	553.589	1217.73	941.909	4153.59	1018.35	809.916	870.761	1125	1042.99	1258.94	879.393	2324.91	820.219	806.853	1256.02	206.204	1955.38	1124.44	884.823
25	1488.54	3150.97	464.758	1166.49	1613.29	992.032	2679.11	1559.55	492.187	816.321	1005.26	1298.76	2229.39	893.316	1268.27	867.837	1036.87	245.328	656.76	1667.45	1483.94	947.617
26	2147.52	2227.58	915.037	826.624	1011.94	982.704	2250.84	1122.63	1206.59	1234.99	826.903	813.954	835.953	867.419	1472.52	429.672	630.585	625.294	783.88	1779.25	2025.84	221.658
27	3104.33	3303.29	891.924	684.468	1013.2	1422.12	1639.46	450	1513.74	185.458	718.997	2318.22	831.915	639.774	827.877	1033.66	832.75	418.116	806.296	1150.48	864.495	440.671
28	3557.81	3303.29	759.375	614.712	1505.52	2205.72	2346.07	485.504	763.412	499.288	1281.91	895.266	1408.62	503.465	1135.58	204.672	505.275	532.286	806.714	2370.85	289.325	749.211
29	1161.62	3614.76	1790.53	618.054	1336.08	904.734	3033.6	1238.34	908.632	862.964	1890.22	458.771	1612.31	492.605	1727.18	269.833	843.332	555.399	510.148	1148.53	634.483	444.709
30	3916.06	2023.19	537.438	1186.68	1712.14	1090.89	2976.79	974.211	683.771	511.68	873.545	916.151	1287.35	404.888	1071.53	437.608	782.07	515.578	1218.42	1604.8	583.942	772.184
31	7921.36	2144.32	1178.05	737.237	2973.03	900.278	3045.57	1636.82	597.865	691.986	950.959	1875.74	992.868	788.614	1315.19	376.207	436.216	390.826	666.646	1416.41	835.396	585.891
32	1994.51	4095.25	1001.64	845.142	1851.93	1511.93	566.398	1730.8	1657.84	1216.75	1541.58	257.302	1501.76	698.252	1077.94	779.285	868.394	786.386	736.262	1601.45	1096.6	697.138
33	4585.9	3106.14	278.326	503.604	1484.64	1924.75	1729.13	1546.46	1306.14	1023.36	811.03	906.404	823.282	730.275	741.692	587.283	978.388	533.261	737.794	3152.92	776.918	1158.56
34	3967.85	3096.95	449.304	1535.74	1453.59	1116.79	677.645	330.26	924.922	1248.92	1316.58	612.206	641.166	1003.45	1028.09	1026.42	265.099	916.986	592.435	1057.61	1055.24	966.414
35	4301.59	4687.82	1015.84	3489.87	1064.15	565.563	1489.37	2305.97	1217.03	906.961	803.372	798.36	1648.93	609.56	1232.77	996.488	946.364	465.594	663.443	1082.67	712.314	389.991
36	4207.61	4490.95	456.961	1449.41	2360.69	1329.95	1103.14	830.383	1010.13	1130.29	570.854	358.942	1491.74	1900.11	1029.49	1503.85	310.35	850.294	1362.11	1700.45	676.949	454.595
37	5535.75	3128.14	405.585	1576.67	1368.93	1171.92	1271.75	1284.28	1160.92	766.615	634.483	485.086	655.786	877.305	1036.59	598.422	207.039	1391.91	179.053	2902.3	457.936	788.474
38	3872.89	2659.62	595.219	2155.6	1412.93	1190.16	1676.36	1279.13	1176.79	773.437	1459.85	438.444	731.25	530.616	851.825	774.83	365.764	808.245	297.819	3858.97	636.989	529.919
39	6839.52	2750.96	1124.58	1616.91	942.744	1303.77	885.102	807.41	203.837	1423.79	846.534	188.103	1294.45	401.825	1163.15	752.274	608.307	973.793	344.462	1528.22	769.121	419.229
40	2866.94	2260.72	1293.19	1672.88	1019.46	1409.31	1123.75	1288.6	883.849	1013.2	886.633	1081.14	1370.74	576.284	1630.28	454.038	459.05	452.784	615.965	1181.25	797.942	447.494
41	3149.58	1347.08	493.719	1741.38	1559.82	1210.77	1045.91	1567.62	809.081	1059.56	618.054	507.503	1361.42	572.385	589.65	591.878	763.134	520.173	356.575	1837.31	699.783	1654.92
42	6472.23	3051.98	1000.39	1584.47	1334.27	1603.12	1039.09	1383.14	324.551	1439.11	508.895	343.348	817.992	1076.96	1352.37	951.376	430.09	872.432	851.129	3147.35	988.273	949.149
43	4889.15	1237.08	526.578	606.08	2896.04	2475.83	1317.42	1435.07	782.209	1191.41	277.491	417.559	1675.25	1306.98	581.435	921.024	391.244	1058.45	634.901	1978.5	719.136	301.439
44	3862.31	2716.15	5865.03	2378.23	698.391	1854.16	1644.76	1529.33	971.287	752.274	329.424	752.831	413.66	1910.27	937.871	526.299	592.017	877.026	418.394	1431.73	937.871	930.909
45	3576.47	2666.3	705.213	1717.57	926.872	1704.07	942.744	1121.94	719.693	846.952	797.942	727.073	2623	2627.88	1010.97	209.406	1832.16	1063.46	931.605	1889.25	1205.06	430.925
46	3160.44	1010.27	490.656	2048.95	1608.69	1838.98	732.642	1021.97	693.1	1324.38	430.09	911.138	1608.55	1093.39	1440.36	804.208	1022.11	418.951	722.339	1230.96	453.341	795.993
47	3760.26	2067.05	877.722	1462.78	1016.54	826.485	569.044	1078.91	1185.98	2067.33	236.695	560.69	964.186	644.229	1388.29	478.543	1516.8	1776.47	903.063	1622.48	865.331	1346.66
48	4501.25	2473.89	715.934	4632.83	1191.83	777.057	870.761	986.602	853.914	938.985	363.815	666.089	696.859	1062.35	1094.09	372.447	435.659	545.374	670.266	2883.09	602.32	910.024
49	1792.06	4080.77	1183.34	4034.4	1234.85	1229.29	1247.11	766.754	998.994	1021.27	1089.22	1179.44	1464.03	696.581	1982.81	502.073	3055.04	743.92	1188.63	1767	764.387	491.352
50	1487.28	3698.85	962.933	3882.36	802.955	1622.06	1092.7	813.815	481.049	1104.95	1147.42	363.536	1437.3	1380.63	1186.12	857.534	814.65	516.553	842.636	2008.01	356.018	1141.99
51	2492.4	2878.36	976.16	1477.95	730.554	1297.65	896.937	861.571	1824.5	1160.5	1101.75	802.398	1316.17	739.464	456.822	691.429	1259.22	1115.81	828.295	834.839	778.589	618.611
52	5849.02	1205.89	429.95	1397.62	949.984	960.705	665.671	768.564	1047.87	1065.83	1046.89	1377.43	1131.4	932.719	875.355	430.229	1833.28	974.071	926.454	1753.22	1367.26	1789.28
53	4127.55	4300.06	456.544	1361	1077.66	1866.13	1020.99	1174.85	1707.55	839.99	419.926	654.95	876.609	283.478	1017.37	846.534	738.629	906.961	467.265	2231.62	1469.6	516.275
54	2286.48	3310.81	1082.53	2014.14	1365.18	1291.38	1062.9	1576.53	555.399	580.322	1018.9	1401.65	1053.57	371.473	1072.09	687.391	443.734	693.1	1025.45	1816.99	1628.88	864.774
55	5652.01	1146.72	340.285	1955.24	1436.88	1210.77	1269.94	1235.83	877.305	256.606	567.234	1438.69	593.827	459.746	956.389	615.13	515.578	821.333	511.123	1301.83	1145.61	581.853
56	6577.35	3914.25	404.332	1878.53	829.966	390.547	1538.24	1684.99	877.305	1132.66	1078.22	248.948	1547.15	644.786	1321.04	320.792	353.372	951.237	576.423	1521.39	574.335	885.659
57	5370.76	4050.7	501.934	935.086	727.351	1339.28	1863.49	1017.09	533.539	610.257	174.041	267.048	460.025	782.627	1116.79	86.185	515.857	306.869	1385.22	1738.32	673.747	431.064
58	4894.86	4522.83	572.525	1709.78	893.177	847.23	1350.28	1062.21	434.545	384.143	537.159	544.121	1012.64	623.484	346.272	590.486	190.331	507.642	545.931	1298.34	940.099	1514.57
59	2681.48	3723.78	1522.79	1345.54	1394.14	1674.55	1511.51	687.948	668.874	1015.98	574.056	809.22	394.307	658.292	972.818	533.957	981.172	988.134	337.221	1730.24	806.435	553.032
60	5160.24	1896.77	319.26	1341.51	1301.69	1520.42	1377.98	861.015	1073.2	1120.82	892.342	860.179	621.395	517.11	1278.71	601.903	2473.19	2261	579.625	2071.5	447.911	386.649
61	2555.2	1421.57	654.811	1181.11	997.462	1671.9	1607.44	521.983	743.224	1291.8	352.676	1433.68	816.878	674.443	913.923	599.257	802.398	497.896	530.894	1419.2	270.668	702.429
62	1762.27	1866.83	1100.49	768.703	915.594	1125	996.209	787.778	2805.54	821.194	447.494	494.137	1787.47	693.657	1421.7	1157.3	1554.11	1286.79	1768.12	3830.99	588.676	680.987
63	3491.54	2360.13	1571.66	331.374	447.633	1570.54	1240.42	671.937	970.312	1420.87	1059.42	744.755	1536.85	821.612	774.69	1782.32	812.84	930.074	619.446	1722.59	796.411	794.879
64	2667.14	2683.71	1493.83	694.771	1295.7	2144.88	1381.88	980.337	677.924	866.445	498.174	1128.9	543.425	1684.02	955.275	1252.12	696.998	504.161	917.961	2739.96	764.666	840.826
65	2799.13	3325.43	724.845	787.36	937.314	935.086	1789.97	811.726	480.213	745.73	303.527	855.584	1232.35	848.344	675.974	535.767	1347.21	813.675	406.559	2747.89	764.666	515.021
66	2211.71	2321.98	748.097	286.541	751.578	1997.29	1499.12	1118.6	922.973	1372.83	949.984	1743.61	1092.28	855.167	1287.9	434.127	670.962	951.098	413.799	1602.43	1062.48	339.171
67	2432.53	3259.3	986.185	796.132	588.258	1607.44	2852.88	722.896	1033.8	1347.21	517.11	1102.31	1557.87	1005.96	1202.97	489.403	256.606	1448.44	309.793	1548.55	235.582	429.95
68	4103.32	1377.29	1383.69	663.165	509.731	1075.57	1258.66	464.619	1502.18	636.572	771.209	610.396	682.379	540.64	1152.15	656.343	559.158	265.099	3344.23	1632.36	320.374	1536.85
69	2751.93	3832.52	810.473	645.065	1887.44	764.805	1808.49	524.489	823.561	953.743	415.47	1551.75	425.773	738.768	956.11	1318.12	602.042	671.101	515.161	1655.06	512.515	967.388
70	4799.07	3607.8	525.046	917.264	1175.54	943.719	970.451	935.504	1369.63	395.838	362.283	1014.17	322.184	1848.45	882.735	297.262	542.45	726.934	336.525	1910.55	3505.6	614.294
71	1077.38	4351.44	763.273	590.346	1226.92	826.763	1030.46	612.206	1119.01	857.394	1036.03	919.631	1506.5	1456.65	1353.62	606.915	648.685	1172.48	713.985	1059.84	685.164	1199.07
72	3851.87	3910.07	915.454	794.601	1989.63	923.391	1164.68	1523.48	722.339	1253.51	393.611	1412.38	1074.6	584.638	2016.37	583.385	568.765	982.286	1190.3	1498	661.633	747.122
73	3622.97	4674.6	569.183	643.115	1246.83	923.391	645.065	590.346	2062.87	1513.04	502.073	772.463	1056.78	826.206	1325.49	778.45	243.518	663.304	355.322	1104.95	863.381	1105.09
74	3746.75	4068.52	468.518	964.325	1258.66	1108.15	607.89	919.353	1035.47	1496.75	696.859	1152.15	1301.69	1087.96	1621.64	248.669	723.313	760.349	713.985	1246.83	1266.6	434.823
75	2757.08	4162.78	763.969	966.553	2709.74	1489.23	928.682	761.463	1638.35	1281.08	580.739	434.127	488.289	1141.29	821.751	484.669	724.706	425.913	1235.55	1224.69	929.239	678.202
76	1802.92	2300.82	2035.16	590.625	1711.31	1321.46	684.468	966.553	1718.13	1459.85	303.945	485.504	668.734	610.117	730.414	692.682	515.439	1142.4	891.924	1366.85	1123.05	923.53
77	1555.37	2847.59	1047.17	1049.26	618.332	932.302	1131.13	466.569	701.732	569.322	532.565	1493.97	720.529	579.486	1431.17	662.887	643.255	1382.58	909.189	1295.42	714.403	1497.87
78	3972.31	2547.82	730.275	1203.81	689.758	1035.89	629.331	1317.56	954.3	2617.3	706.049	306.451	584.359	652.583	723.313	720.25	783.74	235.303	667.76	1285.67	1193.92	848.484
79	3153.06	2706.96	784.019	898.05	1194.34	1497.45	663.722	1166.63	1736.65	1083.23	304.502	1536.15	809.777	915.176	912.252	597.308	646.179	483.973	246.72	1409.17	1694.88	657.178
80	2090.72	5134.48	632.395	933.972	425.913	918.378	924.505	1692.93	1509	1635.84	909.05	924.922	692.961	1011.8	710.643	890.393	1097.57	899.86	346.828	1465.7	656.621	837.484
81	2690.67	2385.47	787.36	938.289	1183.62	1606.05	636.572	763.552	1171.78	1881.73	1037.42	551.083	949.566	420.343	1149.78	1005.96	903.48	594.663	513.908	992.589	741.414	627.8
82	3371.94	2083.2	863.103	637.407	992.45	1744.31	1308.93	717.187	949.427	2081.25	1382.16	938.428	638.521	412.129	409.065	799.195	570.018	664.557	459.189	2143.76	995.235	1472.8
83	1473.5	4472.29	763.273	969.337	942.883	1402.21	1212.02	714.403	583.663	1589.2	790.006	396.256	1249.47	1567.62	903.063	1139.34	698.948	597.169	188.243	1572.21	890.393	919.214
84	2200.15	4060.86	978.805	1080.58	617.636	2986.96	1151.73	2552.83	1333.01	1247.38	883.153	421.875	1432.56	714.263	1139.2	985.071	1246.55	356.436	656.343	979.78	1955.38	680.708
85	2174.12	2223.96	534.375	1147	1473.08	2172.86	695.049	2995.59	2270.88	842.775	762.577	474.783	639.913	459.328	492.605	527.552	1487.56	698.53	246.442	1716.32	322.184	1101.19
86	2264.2	3105.03	465.455	702.289	1750.15	2771.57	694.492	1396.5	1061.51	884.127	1804.59	725.123	430.229	426.052	1182.78	684.607	916.29	503.047	471.442	1182.92	782.348	1070.28
87	3764.71	3436.26	841.8	630.445	1422.96	2093.08	622.231	1649.07	2405.8	1264.09	1264.51	1303.08	2466.37	1278.57	911.834	527.413	633.369	466.012	223.608	1035.61	812.701	660.659
88	5405.15	3147.35	1361.42	795.575	811.448	1021.83	976.021	1279.41	1266.04	723.174	696.442	1830.77	1811	896.24	548.716	444.848	1065.13	730.832	523.793	648.963	1892.45	1102.58
89	6124.29	3233.96	737.097	941.491	1949.95	919.353	1373.39	694.91	1010.83	948.174	740.161	459.746	1279.13	815.068	754.502	575.727	553.032	2866.24	708.833	1043.83	1146.3	1061.79
90	2034.75	3546.53	863.938	810.752	1328.84	1059.28	805.878	1042.99	1068.33	1934.92	880.089	836.788	1256.99	876.609	856.559	853.078	1412.52	415.609	606.915	2269.07	656.064	413.521
91	4994.14	1253.37	1034.08	503.465	1545.06	1317.7	1037.42	1638.07	1223.86	1023.36	589.511	654.393	1631.81	731.807	699.783	742.388	735.009	648.267	417.419	1167.88	436.773	240.316
92	1417.25	2470.54	531.312	770.513	1979.19	1541.58	445.266	1633.06	911.417	1596.44	560.829	944.833	1024.47	1066.8	1516.38	1682.63	367.435	783.183	384.839	829.409	1034.78	637.128
93	3439.05	3739.37	1224.83	611.37	1024.33	1249.89	725.402	900.417	1130.43	702.846	643.394	1568.45	977.97	539.805	536.324	1050.51	820.359	577.676	362.005	1958.86	1045.08	1536.99
94	1698.78	2952.43	698.391	776.779	1654.5	1646.15	410.875	1441.34	1482.97	548.577	896.519	413.103	1035.47	514.047	457.518	1386.9	612.763	2709.33	1371.58	1640.86	422.014	1200.46
95	4059.19	821.472	786.107	584.22	1866.97	1295	360.195	1514.57	981.172	1162.59	742.528	483.276	1350.7	1104.95	431.482	501.237	500.541	766.336	1231.37	1323.27	482.719	1075.43
96	3988.18	1272.87	2371.41	1473.64	1217.73	1447.18	1113.58	377.738	1020.85	1244.18	671.519	289.465	1578.9	471.024	783.183	472.277	387.902	786.386	646.457	2417.22	2072.76	659.545
97	2714.34	2540.44	498.174	638.103	476.454	2440.47	520.452	773.437	1140.32	1051.21	1034.64	460.442	848.623	263.567	940.516	408.926	681.404	709.251	653.558	801.98	2683.57	807.967
98	2946.58	2663.66	722.478	500.541	579.625	1155.63	1034.36	1284	1512.35	527.831	521.287	847.23	515.3	466.429	390.965	675	518.502	765.779	257.302	1833.97	670.266	411.711
99	2133.88	983.4	690.455	780.956	1057.05	1148.95	1142.54	2114.53	1003.17	843.471	823.004	841.243	585.473	461.835	652.583	1126.81	858.787	2240.95	437.608	801.284	1197.12	1752.8
100	2697.77	2531.67	1057.05	208.57	1097.15	1244.74	936.618	1067.08	802.119	1204.92	696.581	700.34	1297.09	229.734	1280.52	410.597	1034.78	1225.94	540.083	690.594	764.666	736.541
101	3251.64	637.964	859.483	921.998	1580.99	1546.6	569.879	677.924	1214.11	1311.71	524.629	533.679	2153.93	493.44	652.444	555.26	694.632	1326.61	290.3	847.787	566.12	1511.37
102	1400.4	1320.2	1595.05	882.735	1045.22	875.495	1190.44	978.805	1763.8	867.698	1453.31	1044.11	496.364	372.169	622.509	545.653	1097.71	519.616	681.961	1071.39	1770.34	1927.12
103	2871.95	2548.38	1421.43	670.962	521.565	1205.06	980.198	1277.46	1209.51	1159.11	1096.46	1811.83	1365.87	331.374	454.038	230.987	376.346	826.763	895.405	723.592	635.736	683.911
104	1696.13	3352.3	1396.5	1245.85	909.746	1364.62	1045.78	1441.2	1244.04	1251.28	1160.64	911.417	609.7	1135.3	332.209	502.769	400.015	665.95	308.122	1093.12	714.82	451.671
105	1667.87	1417.39	1612.59	1655.62	591.321	796.968	663.583	1960.67	983.957	499.149	418.951	360.334	1352.37	991.893	900	685.86	1836.9	1066.52	418.394	363.397	932.302	682.101
106	1963.04	2472.21	1656.45	504.857	1272.17	2009.27	668.038	1223.99	1605.07	1096.32	736.958	1008.88	873.267	340.981	1184.45	333.462	1222.18	380.662	1053.71	765.919	529.641	558.044
107	2501.59	2581.23	419.369	841.661	658.988	2022.49	1149.64	1334.13	1309.07	1021.83	317.868	851.129	923.808	319.678	1210.77	409.065	1159.11	1001.22	1106.2	909.328	917.125	831.08
108	3910.35	2336.46	1208.82	934.251	721.921	995.235	681.683	807.967	1126.39	538.413	1721.05	718.023	842.636	1114.56	775.804	958.756	426.33	1065.13	369.802	751.438	2442.14	994.121
109	2376.42	1971.81	1200.6	717.744	507.364	2707.38	1319.09	620.838	1596.44	1140.45	852.243	1190.44	625.711	781.513	920.188	912.113	1160.37	392.218	654.811	1392.33	1398.31	95.931
110	5472.12	2119.82	1246.83	651.609	544.121	2263.78	898.329	1482.69	1528.08	1050.79	440.95	668.456	560.829	1223.71	331.791	697.416	935.226	948.731	770.513	878.279	666.646	261.757
111	1668.7	2671.74	1666.06	498.314	838.737	1000.39	1109.27	850.851	674.025	795.157	269.276	804.904	717.744	850.433	281.389	898.05	637.268	1076.96	770.653	821.472	771.349	984.514
112	3753.15	2309.17	951.933	848.623	976.16	1964.29	690.455	1082.26	1378.96	1184.45	584.638	1674.97	1030.46	484.251	238.088	707.859	326.64	505.136	417.559	569.879	959.313	1486.73
113	3117.84	3381.96	1881.03	817.156	1662.16	1392.74	821.055	1170.95	667.203	901.67	488.428	1029.35	1249.47	992.868	559.158	290.718	598.561	1157.44	287.515	1491.32	791.398	1432.29
114	1268.41	2068.58	1103.56	477.986	539.526	752.831	909.05	924.087	1544.23	1742.63	1746.39	1275.93	1893.15	454.455	1001.92	1714.51	731.807	549.69	338.892	1741.52	1294.59	977.691
115	2764.05	2468.32	2005.92	449.164	1112.89	728.047	577.258	2010.94	2337.44	1132.38	815.207	1517.22	1508.59	184.483	1475.73	899.721	324.412	327.197	491.909	404.192	1287.62	176.408
116	1243.49	3439.88	1436.74	465.872	911.695	417.419	810.334	1645.59	826.763	952.63	448.886	1145.74	814.929	929.099	726.237	1751.41	889.418	1154.8	404.471	1479.07	880.507	1381.33
117	2093.64	1897.04	592.017	785.272	506.807	995.931	889.836	1062.76	1339	1074.32	758.957	847.648	959.313	1006.65	778.728	1363.92	822.865	1384.95	469.91	463.784	248.391	1242.51
118	2428.77	3203.05	937.453	3278.23	710.365	1551.47	971.426	1620.39	1723.98	1250.31	972.122	530.616	431.621	252.011	1032.13	1667.03	227.228	768.703	503.326	2099.35	481.188	551.222
119	2503.96	3453.8	1250.17	840.13	1204.78	1696.69	844.724	1150.9	990.919	640.052	1112.89	1122.63	1435.21	440.114	940.934	481.745	249.087	587.84	916.151	597.447	1407.22	1831.19
120	2758.48	4767.74	1234.58	1155.91	761.463	1658.96	941.769	1245.16	1012.5	413.382	1104.53	892.342	1125	378.434	698.252	720.668	633.091	752.413	418.394	1606.33	852.243	224.861
121	3870.53	3769.03	1253.79	727.073	908.911	492.187	1026.42	1657.42	1386.9	882.317	613.459	1305.17	1835.64	581.992	389.851	456.683	303.109	421.596	998.019	1668.7	584.777	540.362
122	1180.97	2559.37	1344.57	1527.52	1065.83	1643.5	611.231	919.631	1098.68	591.599	558.044	1450.11	1013.06	340.563	422.014	876.887	480.631	378.434	483.276	1322.01	669.152	774.551
123	2192.91	3756.64	1888.41	972.818	747.818	1209.51	784.994	2144.04	1541.72	488.15	543.286	843.61	963.629	711.479	499.567	996.906	363.815	179.332	926.872	2129.84	631.141	598.422
124	2359.16	2953.54	1987.68	1265.21	1788.3	1491.46	1183.62	1009.02	1240.42	771.488	382.054	628.775	753.666	208.292	737.237	419.508	1147.28	324.273	529.084	1577.23	374.397	621.952
125	3309.98	3369.99	1690.98	1229.01	536.603	1761.57	1319.51	1787.75	1648.79	649.381	1015.7	1168.72	1902.47	592.574	1593.38	315.64	1092.56	1947.86	666.367	888.583	470.328	628.218
126	1786.49	2574.27	944.833	683.075	1466.12	1980.31	1266.46	1276.07	455.43	1555.65	927.15	451.949	1734.98	1048.14	1103.97	798.221	296.565	775.386	477.289	1485.61	1529.47	779.842
127	803.929	2325.18	1330.51	1005.96	1161.76	1646.29	1092.7	1256.3	1357.8	944.693	1458.04	745.312	413.103	504.301	477.707	1578.9	680.569	1897.46	521.705	1317.7	1554.53	777.057
128	728.465	2827.95	933.972	817.992	989.109	976.299	1143.52	1112.75	1240.42	638.66	1700.73	479.517	735.984	628.078	168.054	799.334	909.189	464.619	331.513	1224.41	1168.02	684.885
129	1668.98	5042.45	998.159	643.394	1193.22	1573.89	981.033	1446.77	1760.04	753.109	902.645	343.765	962.794	511.401	716.909	1015.28	444.709	1562.61	505.693	1472.8	1100.91	985.906
130	2310.01	2761.68	1738.74	919.353	826.485	3929.7	1509.7	1726.48	866.305	1024.75	763.273	282.085	1123.05	920.467	802.119	629.192	623.901	979.223	521.148	1395.53	385.814	1000.94
131	2465.25	1585.16	1039.65	2128.17	861.989	1195.17	1214.53	1498.7	1170.11	1300.02	1540.75	325.665	1519.45	424.242	1822.56	561.664	719.972	415.192	391.801	1169	781.373	395.281
132	1326.61	2897.43	901.392	745.173	845.003	1915.42	1852.49	832.333	1021.69	840.408	1328.56	990.083	1004.7	286.262	461.835	505.832	443.734	863.103	391.801	1155.77	671.519	570.297
133	2821.97	3403.68	1596.16	381.08	910.721	1955.66	582.271	792.651	349.892	1085.04	945.111	664.279	1252.54	457.379	459.468	706.188	556.93	902.227	415.331	1759.9	734.731	840.965
134	3406.47	1673.99	1421.98	397.231	545.792	3306.91	2029.59	2101.16	638.521	939.959	541.336	699.644	782.348	688.645	458.354	518.642	1334.68	336.943	325.665	1119.01	517.806	731.25
135	687.809	1221.49	1260.61	4497.21	737.933	1767.7	573.221	1674.13	1406.67	784.994	388.598	435.937	759.235	430.646	998.994	1023.92	871.178	601.206	453.62	653.14	679.037	725.68
136	3275.03	1947.72	1397.34	1102.44	1093.26	2402.32	1212.72	1259.36	994.399	857.673	656.76	188.243	398.066	775.247	639.913	989.248	962.794	699.087	428.558	541.336	464.48	961.958
137	1953.85	3660.43	858.787	899.025	852.382	2624.12	779.146	1535.88	1856.25	929.239	1111.77	372.726	1295.7	201.47	780.538	359.638	556.234	463.784	224.165	1776.33	2890.75	741.831
138	2334.93	3341.44	1059.84	1262.98	946.225	2096.57	455.012	638.242	2209.48	757.843	1473.5	1135.58	690.594	251.036	495.25	649.938	1229.84	358.524	290.439	1241.4	1590.59	1757.95
139	2811.8	3202.77	952.49	1488.12	790.145	2462.05	575.448	1296.39	1267.85	968.363	842.218	702.985	1267.02	417.28	769.26	618.054	879.811	561.386	261.479	1461.8	1403.05	1909.58
140	4137.85	4867.02	644.786	711.339	885.241	1697.94	987.438	1309.62	1197.12	1131.54	783.462	1003.17	671.101	259.947	537.299	630.445	660.241	315.362	766.893	1348.61	631.002	611.788
141	3483.32	4269.71	963.768	645.482	932.441	2644.45	649.242	1502.46	1163.15	1305.03	771.209	845.142	1408.76	1009.3	389.712	655.368	1022.52	1674.41	263.985	2133.32	447.633	416.723
142	2975.96	1344.57	1490.48	1339.28	1004.98	1267.43	2254.87	579.625	621.256	560.829	606.08	985.906	1338.58	541.615	2024.72	531.59	640.192	589.789	440.114	2581.79	906.822	272.478
143	2285.22	2364.31	997.045	647.571	787.639	2675.36	1962.76	1523.48	1217.03	951.933	394.585	1247.66	953.465	446.797	469.91	1519.17	995.931	1259.64	236.556	2217.98	715.238	774.133
144	2521.78	2203.91	600.093	710.365	900.417	1730.24	624.041	1023.92	811.726	762.438	990.222	1871.7	1649.49	364.789	974.35	239.759	1052.46	340.424	500.263	2093.78	1163.29	873.406
145	2361.94	2866.38	1452.34	400.433	1143.93	1608.97	1001.92	1891.89	848.344	901.114	539.944	1477.26	1378.4	537.995	698.53	363.815	430.229	398.345	586.448	1113.03	1493.83	1248.92
146	2130.54	1791.51	847.927	2486.28	1450.39	1483.94	1705.32	745.869	820.916	696.859	1038.12	836.788	995.792	508.895	1674.55	364.511	1078.5	472.834	494.554	1190.02	1406.81	587.562
147	1649.77	2412.76	1232.49	904.734	918.378	2183.31	839.712	1446.49	1018.76	1092.42	1282.75	783.601	820.776	553.032	462.948	887.469	699.365	425.495	572.107	1763.38	934.251	790.841
148	1094.37	1269.52	790.284	1395.25	889.696	2403.16	940.795	1444.68	939.542	510.288	978.945	839.573	583.385	456.265	1210.63	591.46	521.705	616.244	333.88	1357.8	544.817	371.89
149	2839.93	3502.54	850.154	1063.18	942.326	1515.55	899.443	956.667	699.365	779.007	1136	445.544	1161.2	1136.42	852.8	1497.45	580.739	553.31	260.365	2314.46	673.747	150.789
150	2037.67	1701.14	1272.17	487.732	614.712	462.67	1692.65	1174.01	742.528	1715.62	659.127	887.19	1569.01	479.239	381.637	637.546	316.615	455.708	596.194	2419.03	422.293	146.473
151	1133.91	4063.92	580.322	1452.34	961.54	1230.26	559.854	2027.78	671.38	1617.46	932.162	418.672	885.38	401.408	574.195	1702.54	650.077	592.574	966.274	1041.18	1821.16	473.112
152	1707.83	4358.26	718.997	950.68	1083.23	2282.58	610.257	1437.99	1771.04	1107.73	1048.42	444.709	727.49	441.367	1203.25	308.539	467.543	699.783	372.03	1313.24	2257.1	540.362
153	2382.41	2325.05	837.623	1253.51	1379.38	1990.89	908.911	972.401	522.122	1510.26	920.885	768.564	1278.3	697.834	200.217	299.489	381.219	548.159	341.538	1117.06	1557.04	1169
154	1570.96	4352.97	692.125	1120.13	1279.83	1935.61	992.032	1815.32	1237.64	916.429	914.201	1271.61	975.046	637.407	419.229	680.569	954.857	622.091	422.571	1362.67	2062.87	1909.85
155	1400.54	4117.53	724.149	1019.88	742.667	2466.23	1040.62	651.609	1699.06	1861.82	680.987	576.702	721.364	1910.41	446.797	438.583	943.579	650.216	427.723	1756.98	1504.96	854.192
156	4064.76	2822.8	711.757	767.311	1966.94	851.547	1116.79	541.058	1548.82	1502.32	1849.7	490.656	589.511	4350.74	704.099	931.745	751.438	524.907	405.863	1179.58	3220.45	637.268
157	1560.1	2816.95	1213.27	744.198	694.91	295.869	990.362	448.468	598.7	851.547	1290.41	869.508	631.002	477.289	1189.19	962.654	1217.59	397.231	436.494	632.395	1564.97	325.804
158	1192.25	5522.24	730.554	850.572	338.614	508.478	1230.68	1432.29	1347.63	1549.38	1656.73	721.086	755.337	1001.36	1034.5	446.38	1169.14	665.393	697.695	1251.7	1267.57	810.473
159	3231.17	2361.8	517.388	853.078	1010.13	1081.84	549.969	444.987	1135.16	1400.96	985.21	1240.7	897.493	1117.48	498.035	839.294	1097.85	2347.6	591.599	1298.34	2399.4	271.504
160	1207.29	2483.91	946.782	1452.06	878.14	707.719	889.279	1400.26	1061.09	919.075	719.554	525.185	389.573	712.453	818.549	196.04	1522.65	3038.61	586.448	515.578	1179.86	626.268
161	1988.52	3342.14	963.49	1079.75	1201.99	1258.38	1162.45	969.755	531.033	1623.17	1034.22	389.991	377.32	1249.61	1332.73	335.551	813.815	824.814	329.146	521.705	1785.1	1204.36
162	1647.4	2032.24	1185.7	560.829	1081.28	1566.51	1699.47	937.175	356.296	899.86	1244.32	403.496	1077.94	533.539	450.835	328.45	1003.45	641.723	954.857	1915.14	1008.04	1089.91
163	2640.69	2211.57	280.414	1267.71	1574.72	774.133	835.674	897.772	712.175	460.303	981.729	1281.91	1083.37	309.514	886.076	329.424	979.641	339.031	477.011	1555.51	1641.27	1507.61
164	1251.84	2580.82	950.402	730.414	607.193	386.371	1779.67	1089.22	846.952	787.221	1024.06	608.725	476.036	835.813	427.166	410.875	464.758	479.796	305.337	747.54	3353.84	1401.79
165	2486.55	1842.05	1570.68	779.424	845.699	1413.21	1720.08	1228.87	507.085	1039.23	1156.61	960.984	2790.64	503.744	612.206	587.422	794.183	1000.53	362.562	1396.92	2808.74	895.823
166	1946.47	2655.72	1073.2	453.063	1154.24	921.859	1376.73	724.567	695.049	1317.42	712.593	694.492	1223.99	794.322	462.531	1012.5	1370.88	574.056	407.812	1874.63	1134.33	544.956
167	1614.68	2541.97	1884.79	761.045	804.765	2460.94	1449.97	1562.61	1315.33	1136.97	802.119	363.119	1189.88	1074.46	986.185	783.044	877.722	993.425	1081.7	1840.65	1893.42	662.608
168	428.419	2057.86	1540.89	670.266	1282.19	2538.63	890.95	1222.46	1039.65	1214.11	612.624	271.782	828.295	620.838	435.241	679.873	705.074	917.543	758.539	895.266	3243.7	420.204
169	632.812	2832.69	2046.02	844.446	1445.51	1613.43	1818.52	923.948	1478.79	796.968	908.632	1142.12	383.029	658.431	447.076	747.261	844.307	889.279	977.691	1835.64	1254.07	1105.37
170	2152.54	3288.95	455.43	826.903	1156.88	716.491	961.819	743.084	901.949	700.758	1159.81	117.512	1391.77	709.669	319.4	303.109	1209.1	427.723	446.797	1101.89	908.632	492.744
171	1459.58	4673.34	1903.73	1005.54	699.505	1781.2	1871.7	1554.11	2003.97	594.523	964.743	691.568	1087.13	644.925	674.304	769.678	1152.43	1246.27	935.504	1352.09	1346.24	1152.15
172	1541.17	4098.87	755.476	1100.22	768.425	1168.58	1105.09	1121.52	679.734	990.919	686.695	710.922	2061.2	1002.61	362.84	1129.87	680.708	533.4	855.724	613.18	1342.34	392.358
173	4668.75	4256.62	754.223	581.992	610.535	1310.32		1098.13	647.71	405.028	739.325	939.124	1053.71	1010.97	825.789	749.489	577.258	557.487	546.488	1285.4	1802.78	1204.92
174	3575.91	2613.68	812.562	647.849	1009.44	866.445	1596.3	542.59	2171.89	491.909	739.325	499.01	1185.01	900.835	493.58	802.537	849.597	505.136	754.919	1476.42	897.772	601.206
175	2387.98	4021.32	1169.97	642.559	917.264	1518.33	1437.16	2235.94	1580.15	451.392	787.082	529.919	1278.15	1427.55	386.51	788.474	902.645	662.19	1502.32	1227.47	443.734	266.213
176	3701.64	1613.43	1206.17	724.984	693.796	1418.5	2113.27	1198.24	919.771	729.718	1246.41	520.73	1355.15	711.061	830.383	1210.63	748.236	583.802	5660.64	1546.18	635.179	204.254
177	4163.75	3484.44	791.259	492.605	599.814	1655.06	693.796	1211.18	451.531	869.368	1253.65	832.611	1554.25	867.976	1193.64	499.427	608.864	659.127	351.284	1201.44	1493.83	690.176
178	1693.07	2582.21	447.076	715.516	1254.62	1360.58	646.596	1611.2	1502.88	902.924	948.174	428.697	1332.73	686.974	917.404	690.315	757.565	586.448	409.762	1213.55	866.166	418.951
179	3336.29	4483.57	612.902	968.084	1221.21	1170.39	943.579	1486.59	2020.13	1134.61	1215.92	352.119	1267.3	1045.64	307.565	754.641	610.674	708.416	1060.26	427.862	831.358	1146.02
180	3655.97	2967.88	950.82	242.543	911.417	2976.38	749.907	1981.56	1101.61	1516.66	958.477	617.218	1289.85	1672.6	357.549	310.767	541.893	487.732	1083.09	718.301	1885.35	1449.83
181	2210.32	2986.26	921.024	697.277	1332.87	3319.03	668.317	1007.35	750.882	1276.9	446.38	599.257	1768.39	231.405	398.484	1412.1	524.629	561.247	1780.37	1685.83	1706.99	657.317
182	1885.07	3185.78	318.843	659.545	1151.04	1135.72	478.821	1721.05	242.265	731.946	694.075	506.528	959.034	795.297	593.131	1534.2	206.204	280.693	603.852	1358.21	1605.77	1185.43
183	2353.03	3508.66	995.374	972.818	609.839	951.655	886.633	813.118	673.886	769.956	492.327	1165.1	694.492	1000.11	694.353	1529.19	429.254	1249.75	1476.56	1371.02	2165.9	888.443
184	1915.28	3307.61	844.446	606.08	783.323	1218.29	1296.26	1409.73	1196.57	1039.51	614.155	585.055	1476.14	586.865	503.187	594.523	166.94	184.762	872.292	1220.93	1759.76	822.586
185	2418.19	2851.48	1072.79	757.982	1082.53	1422.54	811.726	992.868	601.346	1010.69	616.522	896.658	1753.22	1444.26	340.145	1042.85	324.134	536.742	1572.77	826.485	1007.9	886.912
186	1535.6	3265.42	709.529	746.287	335.551	730.275	716.352	1031.02	671.937	470.328	1223.44	1069.03	886.076	1072.51	263.15	718.58	357.689	518.224	537.02	911.556	1530.58	1915.42
187	4824.13	4611.52	1041.74	776.361	573.499	471.442	568.069	1404.72	984.514	437.469	1127.37	837.345	565.006	483.833	537.438	582.132	543.982	410.179	622.37	921.998	1837.73	1617.88
188	2132.49	2450.91	733.617	329.564	1614.4	762.02	466.569	1757.26	522.54	581.018	492.466	781.513	2540.58	752.552	526.299	413.521	279.301	281.25	503.744	879.672	1548.68	1542.7
189	2288.29	4535.22	1677.2	1130.99	1378.26	1924.61	642.837	1287.48	830.105	657.735	1638.35	676.392	1886.18	1073.62	681.126	444.987	450.139	351.423	698.809	635.597	724.149	318.147
190	3139.7	2017.9	1613.01	796.411	1407.78	655.646	593.409	268.858	951.376	809.498	1200.6	789.31	1622.06	633.091	679.873	398.345	352.398	354.208	459.607	1872.68	1153.4	636.711
191	1954.55	3637.87	1258.8	1205.89	3429.58	1155.49	666.089	1249.89	411.432	1033.94	1077.52	1119.57	1143.1	732.224	1444.54	225.557	355.322	436.355	960.009	1291.38	1356.96	491.77
192	2295.67	3989.01	1578.34	932.719	843.61	1734	1104.95	1802.78	717.605	1068.75	1257.27	778.31	1158.69	645.065	696.302	1204.08	1089.63	848.901	344.183	2498.81	1715.07	176.268
193	2630.38	3448.65	1096.04	1671.07	1912.5	1064.15	769.678	1181.95	786.107	1110.8	1479.21	648.963	1246.55	562.917	230.987	246.303	430.09	924.783	349.613	1422.54	2173	325.247
194	3174.64	3699.55	1117.9	1440.22	1516.24	1138.09	446.101	1056.64	576.702	1408.2	917.404	899.582	1469.6	282.781	477.986	366.46	236.695	1510.12	399.041	853.217	2224.94	1209.93
195	2358.74	2076.24	1632.09	1366.85	1013.2	778.171	1469.6	977.97	784.994	1106.62	469.771	1084.76	899.721	846.813	501.794	635.597	739.464	791.398	515.857	1520.84	938.706	604.966
196	976.995	2089.32	702.429	682.101	864.078	739.743	738.211	1434.93	446.38	939.681	1424.63	994.26	1229.84	541.615	508.756	328.45	674.582	616.383	695.885	1021.69	1608.97	904.177
197	1613.01	3964.09	1262.42	627.939	1484.5	645.343	630.724	1345.96	540.919	874.102	451.253	886.216	1185.57	288.49	442.064	606.219	930.631	188.243	923.948	758.539	1968.33	596.333
198	4033.85	3609.19	1439.11	877.444	1664.66	974.071	1279.69	1093.53	1239.17	1107.18	1191.69	996.488	1335.66	752.135	417.141	490.377	759.375	522.401	664.836	1111.49	2332.01	582.689
199	1788.3	1440.08	2046.58	510.288	1060.4	787.778	1267.57	1082.95	816.599	1873.93	784.437	551.918	599.953	618.75	571.55	1098.41	614.294	463.784	589.232	864.217	1494.8	1661.74
200	2094.62	3444.2	468.657	798.638	775.247	915.594	902.506	1220.65	843.75	1595.88	579.068	1313.94	918.657	350.309	1046.89	1306.42	188.939	355.879	602.46	1357.38	1268.97	1560.8
201	2213.66	2919.85	1142.68	1214.11	2169.38	709.39	449.443	692.125	1139.76	1706.02	1500.93	1540.47	1705.04	1041.88	571.968	461.417	521.565	564.31	717.187	1909.3	1423.51	846.534
202	3444.75	3957.83	1176.93	971.983	1219.96	1286.65	570.018	1167.05	1489.93	817.852	894.152	1481.3	1522.09	812.562	784.019	746.426	1018.49	178.775	834.978	894.152	1509.14	661.633
203	2992.8	2375.45	1259.08	658.292	1868.22	2268.52	479.239	1428.11	749.211	1142.4	639.913	1183.89	1214.25	1269.94	893.595	697.973	797.942	353.512	822.586	1049.67	1130.99	1868.22
204	3037.64	5271.77	1004.15	682.24	1174.43	1929.9	1388.57	1276.21	677.784	1144.91	226.671	1010.69	1649.35	1399.15	1084.2	1344.71	381.776	259.251	737.376	889.418	1115.81	247.695
205	2857.47	2693.04	1166.63	1450.8	2640.55	470.606	951.516	1370.33	755.337	1903.17	552.197	1342.2	1129.18	927.011	873.267	469.075	448.886	319.957	503.744	904.594	1159.81	272.896
206	1359.05	5257.7	652.862	1172.9	958.895	682.797	526.578	1626.52	1591.71	1425.18	400.433	960.148	1256.43	457.797	893.316	957.363	324.69	443.456	336.108	1033.94	760.349	942.326
207	1666.89	4238.8	501.516	899.025	1430.75	1943.97	850.433	1911.11	321.906	1341.51	663.304	852.8	769.678	716.63	873.963	1102.16	765.222	228.481	1232.77	1202.55	610.396	944.554
208	410.458	4667.49	701.175	861.989	1105.92	1011.94	1557.04	911.834	234.746	1119.71	906.822	692.543	1021.55	728.187	895.823	495.807	934.947	325.108	581.992	1493.41	1200.46	954.022
209	1895.23	2508.69	375.51	1518.61	688.645	964.882	959.87	1853.19	759.096	1238.2	1122.21	848.344	1730.8	570.018	628.496	565.424	316.337	400.294	450.139	838.737	1232.77	611.788
210	2161.03	2050.9	773.159	510.844	641.445	773.02	468.657	1673.58	581.714	1106.9	1309.2	1190.3	647.571	1141.01	848.623	295.312	537.577	636.015	500.959	806.992	1152.15	768.843
211	1432.56	3143.59	1108.71	1193.92	1536.85	1208.26	260.643	1265.07	1091.86	1305.58	398.205	597.169	2838.26	705.492	894.013	305.198	441.367	2915.39	127.955	2286.34	1164.4	136.866
212	2261.28	2193.05	772.602	825.789	1837.59	2092.67	1009.02	1034.92	626.686	1006.23	928.125	760.071	1569.15	565.006	727.073	346.272	216.228	1882.98	688.227	943.719	591.321	391.801
213	2982.92	3206.11	829.687	1504.96	721.086	701.872	909.467	2411.23	569.601	1272.72	470.467	307.008	905.012	669.987	905.151	980.894	222.911	437.19	495.111	1178.19	895.405	780.26
214	1785.94	3222.54	335.829	1232.77	624.876	362.144	857.534	724.427	761.324	1982.81	1246.83	378.713	625.433	271.643	1521.12	898.747	645.065	1334.55	757.843	1369.77	766.754	612.624
215	1532.95	3406.19	926.036	1066.94	1702.95	1168.72	877.305	914.062	816.321	1113.3	877.444	1396.36	1494.94	725.402	1354.87	1246.55	829.687	360.056	320.513	1735.54	901.114	780.12
216	2146.55	2616.32	1130.43	603.016	316.337	1169.41	853.078	1516.94	1215.64	1431.45	1150.48	1142.4	1353.48	708.833	916.011	782.07	642.698	1664.39	712.732	389.712	1450.8	1081.98
217	1241.12	2455.09	510.009	810.473	884.127	892.203	1007.49	1312.27	1164.12	732.224	388.181	1530.17	1922.94	651.609	719.276	674.443	718.997	1076.55	946.225	1541.72	1977.8	542.45
218	3133.43	2551.02	491.352	988.83	940.934	1169.28	1348.89	860.179	1381.88	594.106	1305.72	909.328	2307.36	1065.41	434.267	948.313	1047.31	769.817	673.607	1848.87	1402.07	688.645
219	2520.95	1861.96	1105.79	728.465	809.916	764.109	1090.33	1951.9	914.341	813.675	1632.22	1052.32	1009.16	1065.41	442.62	749.489	718.023	622.231	1120.13	1402.49	505.136	315.362
220	2010.66	2823.78	1797.35	744.895	1433.96	804.486	1377.85	860.179	1380.35	999.412	1039.51	811.448	865.888	518.224	558.184	676.253	669.709	603.434	815.068	1599.09	1400.54	635.04
221	896.38	815.207	378.295	836.092	1058.72	1449.97	460.442	1336.91	747.818	831.497	1131.82	538.134	1225.25	1249.19	599.118	575.309	249.087	907.518	490.517	1317.42	1397.34	706.606
222	2971.36	3221.15	1011.39	808.663	1211.74	302.97	1172.2	1165.24	897.633	533.4	1211.32	791.259	1305.72	1557.6	623.623	1759.07	186.293	557.766	351.98	1023.36	2066.21	522.262
223	2477.09	2249.86	1374.92	1339.7	1736.79	982.008	1049.26	1788.16	766.058	1688.61	320.374	779.146	2002.86	645.204	777.475	652.305	713.567	275.402	790.145	1535.46	1836.34	246.024
224	1556.76	2430.3	846.534	1099.52	1189.33	852.382	994.399	1578.34	214.14	1171.92	535.21	718.44	1746.81	550.387	469.353	330.399	530.337	1104.95	1197.12	1658.68	2727.29	469.214
225	3173.67	1870.59	627.243	618.889	1576.25	1903.17	578.233	2204.61	615.687	930.213	204.811	1060.81	1377.71	717.466	845.42	515.161	701.315	320.235	1116.79	2079.44	954.161	661.076
226	2769.34	1354.45	1406.11	700.34	614.434	2620.64	1544.65	949.01	986.463	882.039	460.025	1404.44	1571.1	689.619	915.733	407.116	844.585	329.285	1311.15	1680.82	525.325	1186.54
227	3633.69	1989.77	847.927	957.224	1203.39	2089.46	524.072	690.594	1208.82	724.01	773.716	898.468	1110.24	545.235	254.1	358.385	671.658	491.213	697.834	1073.76	2563.13	750.046
228	2392.57	1344.29	883.988	1348.19	1459.16	1843.86	914.341	1703.93	1081.98	1286.51	619.446	1170.25	700.34	615.965	622.37	521.705	318.007	388.32	424.799	747.818	905.987	450.557
229	1878.53	4416.32	1114.14	674.721	1520.98	904.037	797.107	949.149	608.029	991.754	824.675	788.753	1681.65	567.234	539.805	754.223	595.08	417.698	972.401	1808.77	1483.66	952.63
230	3121.32	1451.92	984.514	1162.17	1102.44	1509.56	1484.64	835.674	281.946	742.528	761.463	468.379	1638.91	1161.2	414.356	552.893	146.89	1226.92	1732.47	2078.47	1715.76	922.973
231	2110.49	4413.26	767.868	804.765	1060.54	1651.3	724.427	1142.68	273.174	1140.18	674.164	777.196	920.049	423.267	537.159	1290.83	743.224	597.726	444.709	1513.46	1240.42	1032.69
232	2582.35	1931.99	1202.55	521.705	1531.56	2049.92	987.577	1369.49	653.558	939.681	1504.83	1984.76	1170.39	965.717	691.568	602.599	540.779	549.551	530.616	2569.4	1160.09	838.877
233	3391.43	4913.52	974.907	807.688	1655.89	1278.71	788.892	507.921	624.319	561.525	1787.19	826.206	1544.92	503.047	624.18	1082.26	585.334	592.713	1438.55	1561.49	1384.67	633.369
234	1263.12	2321.29	1339.7	610.117	1674.41	1026.84	816.321	1188.21	685.721	1324.66	876.609	1538.66	1610.5	657.178	394.168	864.217	944.415	435.798	1602.71	415.609	952.212	733.199
235	2107.84	2810.69	1278.71	782.209	1143.52	1242.51	1046.19	1280.24	775.526	905.012	1365.32	1341.92	919.631	1021.13	373.561	416.306	713.149	447.076	973.375	1298.34	719.136	287.376
236	3170.47	2418.47	1239.03	769.678	1504.69	1221.21	709.808	401.268	970.312	913.784	572.107	1290.55	1315.05	274.567	403.775	461.278	947.896	586.169	1644.62	2543.64	1972.51	971.983
237	3843.38	1975.15	939.263	968.084	1908.46	989.665	1069.72	1449.83	387.484	585.055	911.974	811.865	1434.51	971.008	927.707	366.46	775.526	1177.35	1081.42	1843.58	1610.09	776.5
238	1781.48	1694.74	1400.4	870.343	1316.86	1245.85	1208.12	1122.91	775.804	1596.02	1017.93	1503.71	1333.85	546.488	426.887	465.594	524.768	427.166	1366.99	2243.45	3844.21	480.213
239	1739.29	3376.53	1849.15	969.755	773.02	1369.07	487.036	1211.74	1161.76	1561.77	930.352	924.644	1353.76	732.224	1153.12	280.832	631.698	337.082	1937.42	2177.6	1523.9	787.639
240	3240.22	3338.94	1895.65	1704.35	819.245	1235.13	1245.02	1539.08	1114.28	1101.61	727.212	1353.06	1169.69	764.805	1028.93	310.071	927.707	480.353	2503.26	2295.95	900.278	824.118
241	2837.7	1707.13	1381.47	1335.8	3039.73	1312.27	1008.18	1691.54	687.113	840.408	339.588	1838.98	1506.22	857.255	332.627	645.9	650.495	437.051	1005.12	2233.01	1939.23	531.451
242	2873.2	2897.29	712.175	780.956	1417.94	920.188	3905.06	1186.26	1086.57	1993.67	277.073	1141.85	1506.22	963.49	494.137	570.993	563.753	437.469	788.753	1707.13	3054.21	388.041
243	2720.47	2314.18	3294.24	2878.36	1061.79	493.997	919.91	732.224	481.884	1032.69	898.747	584.22	1273.84	1133.49	620.281	429.393	637.964	472.695	845.42	1390.93	1293.89	370.637
244	2189.71	3511.03	1072.37	830.94	1440.36	293.92	889.975	1559.68	630.724	1200.18	1123.05	415.749	1419.06	1107.46	753.388	777.614	633.648	251.733	361.309	1198.1	2025.28	1096.6
245	2178.43	2479.73	1575.42	404.332	918.239	1409.87	915.176	300.046	1215.5	747.818	1070.98	551.083	1130.43	562.361	712.732	287.376	477.568	242.404	1316.58	907.936	1458.32	697.973
246	2762.24	2023.75	1741.38	1140.45	1122.35	1107.18	761.742	1153.68	597.447	855.167	515.857	1565.81	1302.8	872.014	718.858	1099.38	418.533	747.54	828.991	757.843	1461.25	259.947
247	3605.01	1519.17	1791.09	565.563	995.513	1255.6	1150.76	705.909	1031.3	883.013	467.682	888.861	1941.46	1129.18	139.929	725.959	261.2	322.88	504.579	2035.3	1505.66	1232.07
248	3165.45	2246.24	895.405	451.81	1078.36	1292.64	1317	1441.89	864.217	1347.21	923.251	2218.53	1656.87	1213.27	957.224	168.054	378.017	441.507	589.929	1137.95	1135.02	797.107
249	2953.54	746.705	1210.21	724.01	1832.16	401.408	768.286	998.576	728.326	1005.54	1561.63	998.994	2196.12	478.125	655.089	460.721	684.607	510.844	722.339	787.082	1744.44	1061.65
250	2327.55	2066.35	1241.82	606.08	894.291	944.415	1042.02	1881.87	1269.66	1269.38	1206.73	706.745	1543.25	796.828	305.894	916.847	776.779	483.973	724.845	893.595	1277.04	1026.7
251	2161.73	3931.65	2407.33	781.791	1496.19	373.561	1511.37	964.186	454.038	1507.19	848.344	830.523	1812.53	740.3	789.17	1223.44	1380.49	187.825	930.631	1492.43	1242.51	1482.27
252	2525.4	3241.75	2862.34	1397.34	826.763	2250	1098.82	855.167	1203.94	1355.29	607.611	935.226	887.469	1167.05	1027.82	633.508	198.824	364.372	622.927	1923.78	2827.82	1581.54
253	1738.04	4977.43	1187.24	977.274	400.294	2590.28	867.837	804.347	978.388	1144.63	1171.64	1010.69	1547.01	842.497	2100.32	978.248	865.331	422.293	658.988	2396.89	3050.31	797.246
254	1386.62	5660.78	1321.32	696.442	876.191	1279.69	1165.1	1370.05	1101.61	1561.77	1153.68	885.519	1884.79	339.31	458.632	745.451	898.329	261.897	635.875	1063.32	1769.23	640.609
255	1608.69	7578.29	1078.63	523.375	1161.62	1045.08	881.482	1487.14	1275.51	1256.02	1132.66	1293.05	1448.99	173.623	405.445	786.247	418.116	356.992	1201.72	1935.06	2331.03	738.908
256	3027.89	3912.16	1076.27	479.656	1114.56	826.206	1102.58	948.592	1451.92	1186.96	635.458	1017.93	644.925	955.553	169.168	726.377	707.859	507.085	978.248	1386.62	1541.86	1284.14
257	2659.34	5563.04	1339.84	512.655	780.677	1118.04	654.672	731.11	747.679	2050.9	1069.45	1627.49	1023.22	832.611	122.107	457.936	791.12	470.885	223.19	3031.09	1532.39	884.963
259	1914.31	11242.2	1083.79	443.177	780.677	1357.38	801.98	637.268	636.015	1509.28	1070.7	1254.9	1173.73	905.151	610.953	487.871	463.505	499.427	468.796	1844.28	2114.94	794.183
260	3206.11	4155.54	1946.89	597.169	766.476	1106.34	887.19	1564.14	1069.72	730.832	585.891	888.165	675.835	171.256	1886.74	362.562	1209.51	220.544	974.907	974.211	862.825	1631.11
261	799.752	3806.06	1227.75	1456.65	1519.45	1815.18	659.545	745.591	1996.32	1970.42	813.118	466.151	1386.76	313.552	587.005	348.36	452.367	381.08	503.744	1733.86	1006.23	762.716
262	3475.66	4845.02	1195.03	518.642	1960.39	1484.92	699.644	302.692	1120.54	1473.22	468.379	2182.61	2538.77	541.336	221.798	983.539	1079.61	1108.85	1042.16	1891.06	514.047	2210.74
263	2569.68	8602.21	1323.13	928.264	1778.28	664.975	344.74	692.265	845.838	979.223	816.599	675.278	1776.75	686.417	368.131	1013.61	975.046	246.999	880.089	1847.06	665.253	1101.19
264	1969.59	4731.12	1053.85	1183.62	1552.16	655.368	1019.6	966.831	1028.79	504.44	777.196	983.957	1331.76	667.063	255.91	773.576	611.788	339.867	906.544	1223.02	877.166	961.262
265	1899.13	5285.69	1448.02	897.076	526.717	748.236	1587.81	1649.49	1620.11	845.56	1606.19	1524.6	2579.98	604.27	1318.53	1062.35	582.132	387.484	1960.12	1097.29	753.527	738.211
266	2186.09	6190.42	1602.57	566.538	1365.18	429.393	627.661	979.084	1324.94	1379.1	757.147	784.158	1705.74	715.656	471.163	358.246	797.385	333.88	292.806	1855	570.436	691.151
267	2357.49	4179.9	676.81	1387.04	1176.52	405.306	372.726	1182.22	2029.45	848.484	857.812	960.009	1624.7	808.802	160.118	805.6	946.643	470.467	725.263	1326.75	800.866	1090.89
268	2458.85	7714.04	851.686	1696.97	434.127	620.142	939.542	2192.91	1226.78	1092.98	718.997	1113.3	2352.2	1076.41	434.684	684.328	509.174	528.666	1524.32	1492.16	702.289	845.699
269	3254.28	4505.01	1021.69	790.563	1444.54	837.902	1274.4	800.588	2028.06	585.334	1272.59	1433.68	2827.95	652.723	711.757	1916.4	731.667	227.785	1825.48	992.868	578.094	1371.86
270	2874.32	4367.31	1363.09	512.098	1676.08	840.547	1046.33	1807.24	1128.62	922.277	1586.42	1329.67	2241.51	2116.2	76.439	280.275	609.282	516.831	832.75	1329.39	603.156	1112.33
271	1775.36	3493.07	602.877	777.336	881.064	1015.98	1240.56	1297.65	1095.48	706.188	1215.5	1360.58	1418.22	989.526	320.931	663.165	749.489	381.358	709.112	1123.05	718.858	584.916
272	4372.32	3950.03	1571.52	718.58	820.359	1201.3	1939.79	753.527	1258.52	923.669	806.296	625.015	1626.1	751.021	888.861	1318.25	609.839	590.207	839.155	1071.12	807.967	609.978
273	2574.41	3150.83	934.808	1269.66	1142.96	474.505	1076.13	2041.29	1082.26	1300.15	950.263	1179.16	879.672	740.996	537.299	1569.29	608.586	1118.6	314.387	1509.42	1015.84	814.929
274	3413.29	3891.41	866.166	1496.89	769.399	358.524	1763.24	1055.24	535.21	1187.24	694.214	1625.54	1022.8	818.549	693.796	287.376	564.867	632.255	504.857	1679.56	3352.44	594.106
275	2885.46	2103.25	1521.12	904.455	969.059	1260.33	791.677	1305.58	982.008	386.649	942.605	1124.86	755.198	327.475	1555.23	215.671	704.935	759.235	212.887	1015.84	4739.9	984.235
276	4624.33	1380.49	1741.1	915.454	702.985	1398.45	822.308	1865.02	905.847	1066.24	802.398	2299.43	1175.96	1015.56	1183.89	392.914	274.01	801.841	341.398	1612.45	3318.47	536.603
277	2562.3	1993.39	1258.52	322.88	1358.49	1495.64	1009.02	1492.43	1193.5	1035.19	671.24	314.526	1499.4	569.044	1036.45	336.804	712.453	407.673	495.529	1875.18	2049.36	1071.67
278	2423.34	1711.31	1174.15	1405	1435.49	792.791	877.583	1262.98	1367.54	2358.74	572.664	989.109	636.711	215.254	2273.81	736.541	1500.09	846.674	280.414	1347.08	4138.27	824.118
279	2105.48	2062.45	1808.21	240.594	922.973	683.632	699.783	1625.68	1057.19	903.341	755.337	1204.92	787.917	432.457	1758.23	667.203	685.721	848.484	370.359	1084.48	1502.88	775.526
280	2220.06	2711.69	1112.61	1035.47	1228.73	1237.36	1456.79	954.44	2050.48	1941.74	749.35	557.905	1165.38	672.911	1761.99	1285.12	1044.66	355.322	469.632	1376.59	1467.93	970.591
281	2589.03	3292.16	769.817	1028.37	781.93	1269.52	831.358	708.972	1327.31	2200.43	1675.11	1074.04	1053.43	441.646	1314.22	772.88	1442.87	1172.76	1107.18	2708.91	1550.77	642.698
282	1518.47	3136.77	668.874	1051.21	1537.27	1343.18	695.467	1026.98	1400.26	1261.59	1093.26	589.511	928.821	2358.04	1461.66	1067.08	389.155	522.679	319.26	814.511	1786.49	1046.61
283	2875.85	1535.88	1413.77	832.611	1232.63	2221.74	882.735	900	1487.84	608.168	1075.15	1639.33	831.776	540.223	1294.03	220.266	880.646	675.417	388.459	1852.91	1780.09	1200.46
284	2860.53	1097.71	1015.84	1781.48	986.602	726.098	793.904	1426.86	1353.76	1248.5	421.318	1177.91	1662.58	821.194	1260.33	673.19	379.409	902.088	469.492	608.725	2040.32	1377.29
285	2513.84	1529.89	1851.38	430.229	768.146	788.335	1430.89	1070.28	1048.98	1415.72	875.495	1805.15	1133.49	988.83	1548.82	696.442	721.086	1172.62	266.213	1574.03	929.239	617.775
286	869.368	3602.64	1235.41	1406.81	1217.59	508.756	1079.33	873.685	808.385	826.903	711.896	1762.41	1003.87	937.036	657.596	478.543	406.281	1136.97	936.757	1248.78	1272.31	530.059
287	1767.42	3389.34	764.387	1403.33	864.774	883.292	965.857	1293.89	1803.9	822.865	1041.46	761.324	1554.39	756.312	1868.22	575.17	447.354	581.018	505.971	1589.48	3447.68	382.472
288	1516.66	2712.81	1234.16	879.811	1221.9	1457.63	1283.31	969.755	1506.36	2082.22	865.609	1108.01	1560.66	948.035	1220.79	360.056	661.355	1069.17	604.548	1855.69	983.818	1089.91
289	1475.17	2179.83	568.626	856.281	639.495	515.718	971.008	1696.55	1325.08	1565.25	1472.25	828.713	1719.66	694.214	1334.55	1240.56	634.762	1157.02	965.161	928.821	3731.71	1024.33
290	3234.93	1586.83	1302.52	547.463	1407.09	392.497	765.501	1056.64	989.109	1804.18	671.38	1723.84	875.495	1187.1	1378.4	694.91	887.608	499.845	441.507	1002.34	1570.4	918.657
291	2482.38	1610.36	978.666	1194.76	893.456	940.238	1279.55	1217.17	664.418	984.932	996.07	1189.74	757.147	653.976	1890.36	767.311	585.334	956.25	529.502	2084.87	2579.28	792.791
292	2345.51	1441.34	982.286	948.313	1244.04	1887.58	900.835	949.01	544.956	1476.01	1477.68	562.361	1380.07	1703.09	1363.23	440.81	112.221	2321.29	413.939	1791.64	1532.67	756.869
293	2356.51	962.376	1132.24	850.99	2350.39	546.627	1014.87	422.989	537.716	1388.85	747.54	553.45	2048.81	657.178	570.297	882.596	210.241	1063.46	891.367	1111.63	1947.72	880.786
294	2315.86	4359.51	1567.2	655.786	667.063	618.193	1999.52	1132.66	911.556	2191.66	1113.58	630.585	1930.04	509.731	629.749	997.602	563.474	665.81	1019.74	1745.28	3664.18	1668.84
295	1226.78	2512.73	1434.1	1287.62	857.673	477.568	2758.2	1993.25	1637.52	1923.22	989.805	832.054	985.488	800.588	1510.81	1249.33	575.031	877.166	848.066	2058	1629.3	703.821
296	2702.78	3927.47	878.001	621.674	894.848	896.519	1239.03	1279.83	1261.73	1520.56	623.344	1309.9	3273.36	883.709	1421.01	724.706	534.236	867.141	974.071	1248.22	821.333	769.539
297	1465.14	2383.24	1668.98	182.673	1128.62	820.637	877.305	1946.47	792.791	1936.03	823.839	894.57	1443.15	737.794	1300.15	1238.2	200.913	566.677	989.805	1296.95	3425.12	784.576
298	1075.15	4492.62	1539.77	476.176	855.167	703.403	1198.1	1109.96	955.832	1320.62	412.825	1535.32	2007.6	1097.43	356.714	575.17	346.55	668.317	1693.49	1143.66	1547.99	910.721
299	1046.75	2463.72	1566.09	291.414	985.488	761.463	1072.93	1562.89	1812.53	976.438	346.272	1492.16	2275.9	590.764	700.758	1412.1	408.648	1036.73	280.554	2333.68	998.576	605.523
300	1679.01	3891.13	1401.65	882.178	1276.48	478.403	1127.51	1820.61	1089.08	1730.8	574.056	1409.73	1012.08	1021.97	1318.25	918.935	345.993	629.331	1050.09	1394.41	1101.05	350.866
301	2132.63	2804.84	641.166	873.685	847.091	1598.25	1109.96	1693.21	913.923	1604.93	671.101	1222.32	637.128	485.365	1189.19	506.111	869.508	327.614	328.032	2684.82	1377.57	250.201
302				948.731	909.467			1681.65	861.85	1124.16	126.98	825.649	399.319	991.615	1269.11	649.102	328.45	293.92	576.005	947.06		1025.87
303				512.237	1453.03			1725.79	636.154	939.82	639.217	303.109		1392.61	1249.61		405.724	424.52	534.653	650.773		982.147
304				1587.95				1317.56	2344.4	1641					1567.62		495.529		737.794			228.063
305				1095.48				613.18		1426.86					1240.56		493.44		352.537			1027.54
306								1822		1282.19					1048.14		377.738		284.313			490.934
307								1439.94									668.595		540.779			311.603
308								1305.58									850.851		1017.09			543.703
309								1222.74									1961.93		486.618			745.869
310								1118.73									326.222		520.869			504.161
311								1783.01									552.614		392.497			812.144
312								943.997											1080.31
313								271.504											852.382
314								641.862											1255.6
315								376.207											269.972
316																			481.049
317																			351.562
318																			700.062
319																			778.31
320																			883.988
321																			291.553
322																			498.87
323																			1197.12
324																			1562.33
325																			643.115
326																			434.823
327																			753.945
328																			411.85
329																			930.492
MEDIAN	2460.24	2785.91	1001.01	852.034	1088.24	1214.53	1020.99	1174.43	983.957	1039.51	850.293	854.192	1165.38	714.959	818.549	674.443	642.976	575.797	611.44	1368.31	1100.98	759.793

## Sheet: Fig 2-fig supp 3C
Figures 2L and Figure 2-figure supplement 3C: quantification of bands for P-HSL, total HSL and beta-actin from Western Blots
Signal strength (Raw signal values from LI-COR analysis)												Data normalised by ladder intensity within each gel
Gel number	Lane number	Sex	Diet	Mouse ID	pHSL	totalHSL	ActB	pHSL/HSL	pHSL/ActB	HSL/ActB		Gel number	Lane number	Sex	Diet	Mouse ID	pHSL	totalHSL	ActB	pHSL/HSL	pHSL/ActB	HSL/ActB
1	1	na	na	ladder	435091	318376	2303.36					1	1	na	na	ladder	1.02214	1.0533	0.970934
1	2	Male	AL	627	95912.5	58960	364.105	1.62674	263.42	161.931		1	2	Male	AL	627	0.225323	0.195061	0.153481	1.15514	1.46808	1.27091
1	3	Male	AL	684	115022	50459	1620.41	2.27952	70.9834	31.1396		1	3	Male	AL	684	0.270217	0.166937	0.683051	1.61868	0.395602	0.244399
1	4	Male	AL	591	93392	37585.2	303.316	2.4848	307.903	123.914		1	4	Male	AL	591	0.219401	0.124346	0.127857	1.76445	1.71599	0.97254
1	5	Male	AL	594	125201	37767.2	403.27	3.31508	310.466	93.6526		1	5	Male	AL	594	0.29413	0.124948	0.16999	2.35402	1.73028	0.735032
1	6	Male	AL	595	134036	30668	478.941	4.37057	279.86	64.0329		1	6	Male	AL	595	0.314885	0.101461	0.201888	3.10351	1.55971	0.502561
1	7	Male	AL	656	2585.5	16250.5	571.758	0.159103	4.52202	28.422		1	7	Male	AL	656	0.00607399	0.0537626	0.241012	0.112978	0.025202	0.22307
1	8	Male	AL	664	10823	24613	556.121	0.439727	19.4616	44.2583		1	8	Male	AL	664	0.0254259	0.0814287	0.234421	0.312248	0.108463	0.347361
1	9	Male	AL	683	38314.5	25483.2	715.535	1.50352	53.5466	35.6143		1	9	Male	AL	683	0.0900104	0.0843079	0.301619	1.06764	0.298424	0.279518
1	10	Male	CR	590	292595	62361.2	355.43	4.69194	823.216	175.453		1	10	Male	CR	590	0.68738	0.206314	0.149824	3.33172	4.58792	1.37704
1	11	Male	CR	597	186622	48972.5	794.59	3.81075	234.866	61.6324		1	11	Male	CR	597	0.438422	0.162019	0.334942	2.70599	1.30895	0.483721
1	12	Male	CR	602	58422	23130	263.246	2.52581	221.929	87.8646		1	12	Male	CR	602	0.137248	0.0765224	0.110966	1.79356	1.23685	0.689604
1	13	Male	CR	634	175282	41296	677.496	4.24453	258.72	60.9539		1	13	Male	CR	634	0.411781	0.136622	0.285584	3.01402	1.44189	0.478396
1	14	Male	CR	642	91360.5	41778.2	551.605	2.1868	165.627	75.7394		1	14	Male	CR	642	0.214629	0.138218	0.232518	1.55283	0.923065	0.59444
1	15	Male	CR	676	176715	55068	603.346	3.20903	292.892	91.2711		1	15	Male	CR	676	0.415148	0.182185	0.254328	2.27872	1.63234	0.71634
1	16	na	na	ladder	416244	286152	2441.27					1	16	na	na	ladder	0.977862	0.946696	1.02907
1	17	Female	AL	592	13552	49699	661.178	0.272682	20.4968	75.1674		1	17	Female	AL	592	0.031837	0.164422	0.278705	0.19363	0.114232	0.58995
1	18	Female	AL	563	2360.5	34146	374.738	0.0691296	6.29906	91.1196		1	18	Female	AL	563	0.00554541	0.112967	0.157963	0.0490886	0.0351057	0.715151
1	19	Female	AL	660	16787	35218.5	744.531	0.476653	22.5471	47.3029		1	19	Female	AL	660	0.0394369	0.116516	0.313841	0.338469	0.125659	0.371256
1	20	Female	AL	671	22760	35681.5	516.523	0.637866	44.0638	69.0801		1	20	Female	AL	671	0.0534689	0.118047	0.217729	0.452945	0.245575	0.542174
1	21	Female	CR	570	4889.5	36678.5	150.727	0.133307	32.4395	243.345		1	21	Female	CR	570	0.0114867	0.121346	0.0635356	0.0946606	0.180791	1.90989
1	22	Female	CR	610	47915	47686	217.164	1.0048	220.64	219.585		1	22	Female	CR	610	0.112564	0.157763	0.0915409	0.713505	1.22966	1.72341
1	23	Female	CR	643	56031.5	55444	440.512	1.0106	127.196	125.863		1	23	Female	CR	643	0.131632	0.183429	0.185688	0.717619	0.708887	0.987832
1	24	Female	CR	661	11466.5	58172	306.398	0.197114	37.4235	189.857		1	24	Female	CR	661	0.0269377	0.192454	0.129156	0.139969	0.208567	1.49009
1	25	Female	CR	687	133365	67825	145.156	1.96632	918.772	467.255		1	25	Female	CR	687	0.313309	0.22439	0.0611875	1.39627	5.12047	3.66725
1	26	Female	CR	659	65501	53492.8	311.969	1.22448	209.96	171.468		1	26	Female	CR	659	0.153878	0.176973	0.131504	0.869499	1.17014	1.34577
2	1	na	na	ladder	620688	1240234	6530.93					2	1	na	na	ladder	0.962371	18.9346	0.12209
2	2	Male	AL	620	447	14125	174.09	0.031646	2.56764	81.1363		2	2	Male	AL	620	0.00069307	0.215646	0.00325446	0.00321393	0.21296	66.2616
2	3	Male	AL	580	9831	25398	945.633	0.387078	10.3962	26.8582		2	3	Male	AL	580	0.0152429	0.38775	0.0176778	0.0393111	0.862262	21.9343
2	4	Male	AL	651	20671.5	20588	1038.43	1.00406	19.9064	19.826		2	4	Male	AL	651	0.032051	0.314316	0.0194126	0.101971	1.65104	16.1913
2	5	Male	AL	721	42719.8	20813.8	1028.92	2.05248	41.5192	20.2288		2	5	Male	AL	721	0.0662366	0.317762	0.0192347	0.208447	3.4436	16.5203
2	6	Male	CR	582	40310.2	13259.5	614.227	3.0401	65.6277	21.5873		2	6	Male	CR	582	0.0625007	0.202432	0.0114824	0.308749	5.44316	17.6297
2	7	Male	CR	619	130552	26374.7	641.185	4.9499	203.611	41.1344		2	7	Male	CR	619	0.20242	0.402662	0.0119864	0.502705	16.8875	33.5933
2	8	Male	CR	663	120934	22843.5	1066.44	5.29402	113.4	21.4204		2	8	Male	CR	663	0.187507	0.34875	0.0199361	0.537654	9.4054	17.4934
2	9	Male	CR	701	152151	27119	751.07	5.61049	202.579	36.1071		2	9	Male	CR	701	0.235909	0.414024	0.0140406	0.569795	16.8019	29.4876
2	10	Male	CR	608	153937	28363	1198.99	5.42739	128.388	23.6556		2	10	Male	CR	608	0.238678	0.433016	0.0224142	0.551199	10.6485	19.3189
2	11	na	na	ladder	693858	1347320	7493.04	0.514991				2	11	na	na	ladder	1.07582	20.5695	0.140076	0.0523018
2	12	Female	AL	583	32700	19627	1006.38	1.66607	32.4927	19.5026		2	12	Female	AL	583	0.0507011	0.299644	0.0188134	0.169204	2.69495	15.9272
2	13	Female	AL	586	26357	17019	643.193	1.54868	40.9784	26.4602		2	13	Female	AL	586	0.0408663	0.259828	0.0120239	0.157282	3.39875	21.6093
2	14	Female	AL	593	26337	15775	634.573	1.66954	41.5035	24.8592		2	14	Female	AL	593	0.0408353	0.240836	0.0118628	0.169556	3.4423	20.3018
2	15	Female	AL	599	4578.5	18053.8	748.385	0.253604	6.11784	24.1236		2	15	Female	AL	599	0.00709892	0.275626	0.0139904	0.0257557	0.507414	19.701
2	16	Female	AL	607	2516.5	20784	1095.6	0.121079	2.29691	18.9704		2	16	Female	AL	607	0.00390181	0.317308	0.0204814	0.0122966	0.190506	15.4925
2	17	Female	AL	657	5680.5	20916	1144.07	0.271586	4.96517	18.2821		2	17	Female	AL	657	0.00880757	0.319323	0.0213874	0.027582	0.411811	14.9305
2	18	Female	AL	685	5581.25	19432	954.685	0.28722	5.84617	20.3544		2	18	Female	AL	685	0.00865368	0.296667	0.017847	0.0291697	0.484882	16.6228
2	19	Female	CR	584	59703.5	19593.5	888.073	3.04711	67.2282	22.0629		2	19	Female	CR	584	0.0925698	0.299133	0.0166017	0.30946	5.57591	18.0182
2	20	Female	CR	585	33370	21212.8	648.706	1.57311	51.4409	32.7001		2	20	Female	CR	585	0.0517399	0.323854	0.012127	0.159763	4.26651	26.7052
2	21	Female	CR	600	102199	26403.3	598.359	3.87069	170.798	44.1261		2	21	Female	CR	600	0.158458	0.403097	0.0111858	0.393102	14.166	36.0365
2	22	Female	CR	632	18299.5	12449.5	949.146	1.4699	19.28	13.1165		2	22	Female	CR	632	0.0283732	0.190066	0.0177434	0.149281	1.59908	10.7119
2	23	Female	CR	662	14168.5	31149.8	906.076	0.454851	15.6372	34.3788		2	23	Female	CR	662	0.0219681	0.475561	0.0169383	0.0461941	1.29695	28.0761
2	24	Female	CR	686	854	3681.25	971.307	0.231986	0.879227	3.79		2	24	Female	CR	686	0.00132412	0.0562014	0.0181577	0.0235602	0.0729232	3.09518
2	25	Female	CR	598	29727	27900.5	415.029	1.06546	71.6264	67.2255		2	25	Female	CR	598	0.0460915	0.425955	0.0077586	0.108207	5.9407	54.9011
2	26	na	na	ladder	620325	1338045	7596.32					2	26	na	na	ladder	0.961809	20.4279	0.142006
ladder average, gel 1	425668	302264	2372.32
ladder average, Gel 2	644957	1308533	7206.76
Data arranged by sex and diet
			Normalised by ladder bands									Figure 2L		Figure S4C		Figure S4C
Sex	Diet	Mouse ID	pHSL	totalHSL	ActB	pHSL/HSL	pHSL/ActB	HSL/ActB	Sample excluded?	Reason for exclusion?	Average of pHSL/HSL	pHSL/HSL Normalised by its Ave.	Average of AL pHSL/ActB	pHSL/ActB Normalised by its Ave.	Average of HSL/ActB	HSL/ActB Normalised by its Ave.
Male	AL	627	0.225323	0.195061	0.153481	1.15514	1.46808	1.27091	No	na	1.07622	0.786835	1.20533	0.00234144	5.38376	6.51547
Male	AL	684	0.270217	0.166937	0.683051	1.61868	0.395602	0.244399	No	na		1.10258		0.000630945		1.25293
Male	AL	591	0.219401	0.124346	0.127857	1.76445	1.71599	0.97254	No	na		1.20187		0.00273683		4.98582
Male	AL	594	0.29413	0.124948	0.16999	2.35402	1.73028	0.735032	No	na		1.60347		0.00275962		3.76821
Male	AL	595	0.314885	0.101461	0.201888	3.10351	1.55971	0.502561	No	na		2.11399		0.00248757		2.57643
Male	AL	656	0.00607399	0.0537626	0.241012	0.112978	0.025202	0.22307	No	na		0.0769562		4.01945e-05		1.14359
Male	AL	664	0.0254259	0.0814287	0.234421	0.312248	0.108463	0.347361	No	na		0.212691		0.000172987		1.78078
Male	AL	683	0.0900104	0.0843079	0.301619	1.06764	0.298424	0.279518	No	na		0.727234		0.000475956		1.43298
Male	AL	620	0.00069307	0.215646	0.00325446	0.00321393	0.21296	66.2616	Yes	Very low loading		0.0021892		0.000339649		339.697
Male	AL	580	0.0152429	0.38775	0.0176778	0.0393111	0.862262	21.9343	No	na		0.0267772		0.00137522		112.448
Male	AL	651	0.032051	0.314316	0.0194126	0.101971	1.65104	16.1913	No	na		0.0694584		0.00263324		83.0065
Male	AL	721	0.0662366	0.317762	0.0192347	0.208447	3.4436	16.5203	No	na		0.141986		0.00549219		84.6928
Male	CR	590	0.68738	0.206314	0.149824	3.33172	4.58792	1.37704	No	na		2.26944		0.00731726		7.05954
Male	CR	597	0.438422	0.162019	0.334942	2.70599	1.30895	0.483721	No	na		1.84322		0.00208763		2.47985
Male	CR	602	0.137248	0.0765224	0.110966	1.79356	1.23685	0.689604	No	na		1.22171		0.00197265		3.53532
Male	CR	634	0.411781	0.136622	0.285584	3.01402	1.44189	0.478396	No	na		2.05303		0.00229967		2.45254
Male	CR	642	0.214629	0.138218	0.232518	1.55283	0.923065	0.59444	No	na		1.05773		0.00147219		3.04745
Male	CR	676	0.415148	0.182185	0.254328	2.27872	1.63234	0.71634	No	na		1.55217		0.00260341		3.67239
Male	CR	582	0.0625007	0.202432	0.0114824	0.308749	5.44316	17.6297	No	na		0.210308		0.00868128		90.3805
Male	CR	619	0.20242	0.402662	0.0119864	0.502705	16.8875	33.5933	No	na		0.342423		0.0269338		172.219
Male	CR	663	0.187507	0.34875	0.0199361	0.537654	9.4054	17.4934	No	na		0.366229		0.0150006		89.6816
Male	CR	701	0.235909	0.414024	0.0140406	0.569795	16.8019	29.4876	No	na		0.388122		0.0267973		151.171
Male	CR	608	0.238678	0.433016	0.0224142	0.551199	10.6485	19.3189	No	na		0.375455		0.0169833		99.0401
Female	AL	592	0.031837	0.164422	0.278705	0.19363	0.114232	0.58995	No	na		0.131893		0.000182188		3.02444
Female	AL	563	0.00554541	0.112967	0.157963	0.0490886	0.0351057	0.715151	No	na		0.0334372		5.599e-05		3.66629
Female	AL	660	0.0394369	0.116516	0.313841	0.338469	0.125659	0.371256	No	na		0.230552		0.000200412		1.90328
Female	AL	671	0.0534689	0.118047	0.217729	0.452945	0.245575	0.542174	No	na		0.308528		0.000391667		2.77951
Female	AL	583	0.0507011	0.299644	0.0188134	0.169204	2.69495	15.9272	No	na		0.115255		0.00429816		81.6524
Female	AL	586	0.0408663	0.259828	0.0120239	0.157282	3.39875	21.6093	No	na		0.107134		0.00542065		110.782
Female	AL	593	0.0408353	0.240836	0.0118628	0.169556	3.4423	20.3018	No	na		0.115495		0.00549012		104.079
Female	AL	599	0.00709892	0.275626	0.0139904	0.0257557	0.507414	19.701	No	na		0.0175438		0.000809272		100.999
Female	AL	607	0.00390181	0.317308	0.0204814	0.0122966	0.190506	15.4925	No	na		0.00837597		0.000303837		79.424
Female	AL	657	0.00880757	0.319323	0.0213874	0.027582	0.411811	14.9305	No	na		0.0187878		0.000656796		76.5424
Female	AL	685	0.00865368	0.296667	0.017847	0.0291697	0.484882	16.6228	No	na		0.0198692		0.000773336		85.2185
Female	CR	570	0.0114867	0.121346	0.0635356	0.0946606	0.180791	1.90989	No	na		0.0644791		0.000288343		9.79123
Female	CR	610	0.112564	0.157763	0.0915409	0.713505	1.22966	1.72341	No	na		0.486012		0.00196118		8.83524
Female	CR	643	0.131632	0.183429	0.185688	0.717619	0.708887	0.987832	No	na		0.488814		0.0011306		5.06422
Female	CR	661	0.0269377	0.192454	0.129156	0.139969	0.208567	1.49009	No	na		0.0953417		0.000332643		7.63911
Female	CR	687	0.313309	0.22439	0.0611875	1.39627	5.12047	3.66725	No	na		0.951086		0.00816662		18.8005
Female	CR	659	0.153878	0.176973	0.131504	0.869499	1.17014	1.34577	No	na		0.592269		0.00186626		6.89921
Female	CR	584	0.0925698	0.299133	0.0166017	0.30946	5.57591	18.0182	No	na		0.210792		0.00889299		92.3719
Female	CR	585	0.0517399	0.323854	0.012127	0.159763	4.26651	26.7052	No	na		0.108824		0.00680464		136.907
Female	CR	600	0.158458	0.403097	0.0111858	0.393102	14.166	36.0365	No	na		0.267766		0.0225933		184.745
Female	CR	632	0.0283732	0.190066	0.0177434	0.149281	1.59908	10.7119	No	na		0.101684		0.00255037		54.9155
Female	CR	662	0.0219681	0.475561	0.0169383	0.0461941	1.29695	28.0761	No	na		0.0314656		0.0020685		143.935
Female	CR	686	0.00132412	0.0562014	0.0181577	0.0235602	0.0729232	3.09518	No	na		0.0160483		0.000116305		15.8677
Female	CR	598	0.0460915	0.425955	0.0077586	0.108207	5.9407	54.9011	No	na		0.0737066		0.00947479		281.456
