# Supplementary material for: The effects of caloric restriction on adipose tissue and metabolic health are sex- and age-dependent
Source: eLife journal article supplement (doi:10.7554/elife.88080), 2023-04-18
Supplement: supp [file Figure 2-figure supplement 4_Source_Data.xlsx]

## Sheet: Fig 2-fig supp 4A-H
Figure 2-figure supplement 4A-H: Body mass, fat mass and lean mass (absolute, g; and fold vs week 0), and tissue masses (absolute and % body mass)
	Group	M AL PM-Fed	M AL PM-Fed	M AL PM-Fed	M AL PM-Fed	M AL PM-Fed	M CR PM-Fed	M CR PM-Fed	M CR PM-Fed	M CR PM-Fed	M CR PM-Fed	M CR PM-Fed	F AL PM-Fed	F AL PM-Fed	F AL PM-Fed	F AL PM-Fed	F AL PM-Fed	F CR PM-Fed	F CR PM-Fed	F CR PM-Fed	F CR PM-Fed	F CR PM-Fed	F CR PM-Fed
	Study	bEX4	bEX4	bEX4	bEX4	bEX4	bEX4	bEX4	bEX4	bEX4	bEX4	bEX4	bEX4	bEX4	bEX4	bEX4	bEX4	bEX4	bEX4	bEX4	bEX4	bEX4	bEX4
	Mouse ID	35/ 5341	38/ 5344	43/ 5371	46/ 5374	55/ 5383	36/ 5342	37/ 5343	39/ 5345	44/ 5372	45/ 5373	54/ 5382	42/ 5348	48/ 5376	50/ 5378	51/ 5379	52/ 5380	40/ 5346	41/ 5347	47/ 5375	49/ 5377	53/ 5381	56/ 5384
Figure
Figure 2-figure supplement 4A: Body mass (g)	Week 0	23.76	24.74	25.5	26.2	26.4	22.19	22.34	25.92	24.2	23.9	25.3	18.93	18.4	19.7	18.7	18	19.94	20.28	18.4	17.4	19.7	20.4
Figure 2-figure supplement 4A: Body mass (g)	Week 1	23.9	25	26.3	26.6	27.8	20.4	19	22.2	19.2	20.9	20.5	19.3	18.9	18.9	18.2	19.1	17.6	17.7	16.5	16	17.6	16.4
Figure 2-figure supplement 4A: Body mass (g)	Week 2	26.2	25.5	27.5	27.7	30	20.1	17.6	21.1	19.2	20.7	19	20.7	20.3	19.8	19.4	19.6	17.6	18.4	17	16.9	17.7	15
Figure 2-figure supplement 4A: Body mass (g)	Week 3	27.2	26.6	27.4	27.1	29.7	20.2	17.5	20.8	19.8	20.6	19	21	20.5	20	20.9	19.7	17.7	18.8	17.9	17.6	18.1	15
Figure 2-figure supplement 4A: Body mass (g)	Week 4	27.3	28	27.8	28.5	32.4	21.6	18.4	22	22	21.8	21.7	21.3	22	21.8	20.7	20.8	18.8	19.6	19.5	18.3	20.4	18.7
Figure 2-figure supplement 4B: Body mass (fold vs week 0)	Week 0	1	1	1	1	1	1	1	1	1	1	1	1	1	1	1	1	1	1	1	1	1	1
Figure 2-figure supplement 4B: Body mass (fold vs week 0)	Week 1	1.00589	1.01051	1.03137	1.01527	1.05303	0.919333	0.850492	0.856481	0.793388	0.874477	0.810277	1.01955	1.02717	0.959391	0.973262	1.06111	0.882648	0.872781	0.896739	0.91954	0.893401	0.803922
Figure 2-figure supplement 4B: Body mass (fold vs week 0)	Week 2	1.10269	1.03072	1.07843	1.05725	1.13636	0.905813	0.787825	0.814043	0.793388	0.866109	0.750988	1.0935	1.10326	1.00508	1.03743	1.08889	0.882648	0.907298	0.923913	0.971264	0.898477	0.735294
Figure 2-figure supplement 4B: Body mass (fold vs week 0)	Week 3	1.14478	1.07518	1.07451	1.03435	1.125	0.91032	0.783348	0.802469	0.818182	0.861925	0.750988	1.10935	1.11413	1.01523	1.11765	1.09444	0.887663	0.927022	0.972826	1.01149	0.918782	0.735294
Figure 2-figure supplement 4B: Body mass (fold vs week 0)	Week 4	1.14899	1.13177	1.0902	1.08779	1.22727	0.973411	0.823635	0.848765	0.909091	0.912134	0.857708	1.1252	1.19565	1.1066	1.10695	1.15556	0.942828	0.966469	1.05978	1.05172	1.03553	0.916667
Figure 2-figure supplement 4C: Fat mass (g)	Week 0	2.212	2.578	0.317	1.212	1.379	1.515	0.796	1.647	0.605	1.155	0.712	1.41	0.076	2.005	1.661	0.463	0.907	0.842	0.61	0.537	0.264	1.349
Figure 2-figure supplement 4C: Fat mass (g)	Week 2	2.464	2.542	2.154	2.492	3.19	1.247	0.24	0.85	0.75	0.94	0.706	1.213	0.085	1.303	0.846	0.017	1.073	1.245	1.633	0.503	1.59	0.374
Figure 2-figure supplement 4C: Fat mass (g)	Week 4	3.428	4.23	2.987	2.982	6.43	1.657	0.576	1.64	2.053	1.511	2.171	1.592	0.578	1.785	0.796	0.388	1.956	1.567	1.945	0.782	2.711	2.019
Figure 2-figure supplement 4D: Fat mass (fold vs week 0)	Week 0	1	1	1	1	1	1	1	1	1	1	1	1	1	1	1	1	1	1	1	1	1	1
Figure 2-figure supplement 4D: Fat mass (fold vs week 0)	Week 2	1.11392	0.986036	6.79495	2.05611	2.31327	0.823102	0.301508	0.51609	1.23967	0.813853	0.991573	0.860284	1.11842	0.649875	0.509332	0.0367171	1.18302	1.47862	2.67705	0.936685	6.02273	0.277242
Figure 2-figure supplement 4D: Fat mass (fold vs week 0)	Week 4	1.54973	1.64081	9.42271	2.4604	4.6628	1.09373	0.723618	0.99575	3.39339	1.30823	3.04916	1.12908	7.60526	0.890274	0.479229	0.838013	2.15656	1.86105	3.18852	1.45624	10.2689	1.49666
Figure 2-figure supplement 4C: Lean mass (g)	Week 0	16.59	16.853	18.701	18.827	18.994	15.818	16.524	18.55	17.564	16.845	18.365	13.359	13.181	13.065	12.602	12.755	14.439	14.738	12.974	12.523	14.182	13.838
Figure 2-figure supplement 4C: Lean mass (g)	Week 2	17.784	16.899	19.045	19.111	19.978	14.136	12.757	14.784	13.869	14.514	13.323	14.647	14.739	14.09	13.511	14.331	12.29	12.486	11.465	12.069	12.031	10.57
Figure 2-figure supplement 4C: Lean mass (g)	Week 4	17.807	17.933	18.285	19.175	19.526	14.157	12.588	14.648	13.912	14.214	13.164	15.055	15.424	15.421	14.629	14.939	11.936	12.899	12.458	12.292	12.303	11.097
Figure 2-figure supplement 4D: Lean mass (fold vs week 0)	Week 0	1	1	1	1	1	1	1	1	1	1	1	1	1	1	1	1	1	1	1	1	1	1
Figure 2-figure supplement 4D: Lean mass (fold vs week 0)	Week 2	1.07197	1.00273	1.01839	1.01508	1.05181	0.893665	0.772029	0.796981	0.789627	0.861621	0.725456	1.09641	1.1182	1.07845	1.07213	1.12356	0.851167	0.847198	0.88369	0.963747	0.848329	0.763839
Figure 2-figure supplement 4D: Lean mass (fold vs week 0)	Week 4	1.07336	1.06408	0.977755	1.01848	1.02801	0.894993	0.761801	0.78965	0.792075	0.843811	0.716798	1.12696	1.17017	1.18033	1.16085	1.17123	0.82665	0.875221	0.960228	0.981554	0.867508	0.801922
Figure 2-figure supplement 4G-H: absolute body or tissue masses (g)	Body mass (g) at cull	27.3	28.8	27.8	28.5	32.4	21.6	18.4	21.9	22	21.8	21.7	21.3	22	21.8	20.7	20.8	19	19.7	19.5	18.3	20.4	18.7
Figure 2-figure supplement 4G-H: absolute body or tissue masses (g)	BAT	0.124	0.14	0.119	0.103	0.186	0.19	0.077	0.1	0.095	0.138	0.091	0.1	0.068	0.104	0.08	0.097	0.094	0.113	0.088	0.069	0.086	0.082
Figure 2-figure supplement 4G-H: absolute body or tissue masses (g)	iWAT	0.369	0.497	0.305	0.371	0.546	0.225	0.154	0.2	0.298	0.308	0.205	0.226	0.207	0.266	0.2	0.156	0.236	0.224	0.232	0.165	0.395	0.25
Figure 2-figure supplement 4G-H: absolute body or tissue masses (g)	gWAT	0.604	0.689	0.455	0.482	0.706	0.323	0.092	0.218	0.284	0.279	0.202	0.254	0.152	0.255	0.279	not recorded	0.128	0.256	not recorded	0.166	0.3	0.195
Figure 2-figure supplement 4G-H: absolute body or tissue masses (g)	mWAT	0.22	0.242	0.102	0.294	0.31	0.128	0.074	0.153	0.125	0.142	0.068	0.154	0.057	0.105	0.101	0.088	0.085	0.17	0.116	0.079	0.112	0.116
Figure 2-figure supplement 4G-H: absolute body or tissue masses (g)	pWAT	0.075	0.273	0.204	0.142	0.321	0.047	0.031	0.074	0.069	0.049	0.06	0.108	0.101	0.167	0.082	0.077	0.052	0.089	0.129	0.082	0.164	0.132
Figure 2-figure supplement 4G-H: absolute body or tissue masses (g)	pcWAT	0.008	0.021	0.02	0.017	0.025	0.005	0.022	0.006	0.009	0.008	0.001	0.008	0.021	0.008	0.008	0.007	0.006	0.008	0.01	0.007	0.02	0.02
Figure 2-figure supplement 4G-H: absolute body or tissue masses (g)	Spleen	0.065	0.075	0.115	0.073	0.074	0.044	0.031	0.044	0.044	0.039	0.041	0.149	0.082	0.094	0.077	0.078	0.045	0.06	not recorded	0.066	0.053	0.04
Figure 2-figure supplement 4G-H: absolute body or tissue masses (g)	Pancreas	0.098	0.122	0.134	0.144	0.198	0.111	0.099	0.123	0.106	0.111	0.122	0.239	0.155	0.133	0.113	0.127	0.117	0.145	0.093	0.098	0.116	0.108
Figure 2-figure supplement 4G-H: absolute body or tissue masses (g)	Heart	0.19	0.159	0.162	0.142	0.167	0.115	0.132	0.175	0.137	0.098	0.112	0.121	0.118	0.124	0.121	0.124	0.129	0.095	0.098	0.097	0.113	0.103
Figure 2-figure supplement 4G-H: absolute body or tissue masses (g)	Thymus	0.085	0.054	0.059	0.072	0.073	0.045	0.033	0.03	0.037	0.056	not recorded	0.066	0.082	0.087	0.071	0.067	0.037	0.052	0.039	0.053	0.069	0.038
Figure 2-figure supplement 4G-H: absolute body or tissue masses (g)	Adrenal Glands (x2)	0.007	0.004	0.006	0.011	0.006	0.007	0.004	0.009	0.006	0.009	0.007	0.003	0.009	0.008	0.009	0.007	0.005	0.007	0.008	0.006	0.009	0.008
Figure 2-figure supplement 4G-H: absolute body or tissue masses (g)	Kidney (x2)	0.326	0.361	0.33	0.372	0.407	0.259	0.193	0.233	0.227	0.241	0.26	0.301	0.255	0.274	0.254	0.249	0.219	0.237	0.205	0.209	0.215	0.198
Figure 2-figure supplement 4G-H: absolute body or tissue masses (g)	Liver	1.183	1.29	1.235	1.302	1.532	0.985	0.855	0.954	0.981	0.96	1.088	0.85	1.052	0.877	1.001	0.948	0.773	0.904	0.839	0.825	0.869	0.88
Figure 2-figure supplement 4G-H: absolute body or tissue masses (g)	Gastroc	0.281	0.28	0.341	0.366	0.386	0.234	0.198	0.192	0.26	0.263	0.245	0.204	0.27	0.245	0.268	0.275	0.195	0.196	0.221	0.26	0.275	0.179
Figure 2-figure supplement 4G-H: tissue masses (% body mass)	BAT	0.454212	0.486111	0.428058	0.361404	0.574074	0.87963	0.418478	0.456621	0.431818	0.633028	0.419355	0.469484	0.309091	0.477064	0.386473	0.466346	0.494737	0.573604	0.451282	0.377049	0.421569	0.438503
Figure 2-figure supplement 4G-H: tissue masses (% body mass)	iWAT	1.35165	1.72569	1.09712	1.30175	1.68519	1.04167	0.836957	0.913242	1.35455	1.41284	0.9447	1.06103	0.940909	1.22018	0.966184	0.75	1.24211	1.13706	1.18974	0.901639	1.93627	1.3369
Figure 2-figure supplement 4G-H: tissue masses (% body mass)	gWAT	2.21245	2.39236	1.63669	1.69123	2.17901	1.49537	0.5	0.995434	1.29091	1.27982	0.930876	1.19249	0.690909	1.16972	1.34783	not recorded	0.673684	1.29949	not recorded	0.907104	1.47059	1.04278
Figure 2-figure supplement 4G-H: tissue masses (% body mass)	mWAT	0.805861	0.840278	0.366906	1.03158	0.95679	0.592593	0.402174	0.69863	0.568182	0.651376	0.313364	0.723005	0.259091	0.481651	0.487923	0.423077	0.447368	0.862944	0.594872	0.431694	0.54902	0.620321
Figure 2-figure supplement 4G-H: tissue masses (% body mass)	pWAT	0.274725	0.947917	0.733813	0.498246	0.990741	0.217593	0.168478	0.3379	0.313636	0.224771	0.276498	0.507042	0.459091	0.766055	0.396135	0.370192	0.273684	0.451777	0.661538	0.448087	0.803922	0.705882
Figure 2-figure supplement 4G-H: tissue masses (% body mass)	pcWAT	0.029304	0.0729167	0.0719424	0.0596491	0.0771605	0.0231481	0.119565	0.0273973	0.0409091	0.0366972	0.00460829	0.0375587	0.0954545	0.0366972	0.0386473	0.0336538	0.0315789	0.0406091	0.0512821	0.0382514	0.0980392	0.106952
Figure 2-figure supplement 4G-H: tissue masses (% body mass)	Spleen	0.238095	0.260417	0.413669	0.25614	0.228395	0.203704	0.168478	0.200913	0.2	0.178899	0.18894	0.699531	0.372727	0.431193	0.371981	0.375	0.236842	0.304569	not recorded	0.360656	0.259804	0.213904
Figure 2-figure supplement 4G-H: tissue masses (% body mass)	Pancreas	0.358974	0.423611	0.482014	0.505263	0.611111	0.513889	0.538043	0.561644	0.481818	0.509174	0.562212	1.12207	0.704545	0.610092	0.545894	0.610577	0.615789	0.736041	0.476923	0.535519	0.568627	0.57754
Figure 2-figure supplement 4G-H: tissue masses (% body mass)	Heart	0.695971	0.552083	0.582734	0.498246	0.515432	0.532407	0.717391	0.799087	0.622727	0.449541	0.516129	0.568075	0.536364	0.568807	0.584541	0.596154	0.678947	0.482234	0.502564	0.530055	0.553922	0.550802
Figure 2-figure supplement 4G-H: tissue masses (% body mass)	Thymus	0.311355	0.1875	0.21223	0.252632	0.225309	0.208333	0.179348	0.136986	0.168182	0.256881	not recorded	0.309859	0.372727	0.399083	0.342995	0.322115	0.194737	0.263959	0.2	0.289617	0.338235	0.203209
Figure 2-figure supplement 4G-H: tissue masses (% body mass)	Adrenal Glands (x2)	0.025641	0.0138889	0.0215827	0.0385965	0.0185185	0.0324074	0.0217391	0.0410959	0.0272727	0.0412844	0.0322581	0.0140845	0.0409091	0.0366972	0.0434783	0.0336538	0.0263158	0.035533	0.0410256	0.0327869	0.0441176	0.0427807
Figure 2-figure supplement 4G-H: tissue masses (% body mass)	Kidney (x2)	1.19414	1.25347	1.18705	1.30526	1.25617	1.19907	1.04891	1.06393	1.03182	1.1055	1.19816	1.41315	1.15909	1.25688	1.22705	1.19712	1.15263	1.20305	1.05128	1.14208	1.05392	1.05882
Figure 2-figure supplement 4G-H: tissue masses (% body mass)	Liver	4.33333	4.47917	4.44245	4.56842	4.7284	4.56019	4.64674	4.35616	4.45909	4.40367	5.01382	3.99061	4.78182	4.02294	4.83575	4.55769	4.06842	4.58883	4.30256	4.5082	4.2598	4.70588
Figure 2-figure supplement 4G-H: tissue masses (% body mass)	Gastroc	1.0293	0.972222	1.22662	1.28421	1.19136	1.08333	1.07609	0.876712	1.18182	1.20642	1.12903	0.957746	1.22727	1.12385	1.29469	1.32212	1.02632	0.994924	1.13333	1.42077	1.34804	0.957219
