# Supplementary material for: The effects of caloric restriction on adipose tissue and metabolic health are sex- and age-dependent
Source: eLife journal article supplement (doi:10.7554/elife.88080), 2023-04-18
Supplement: supp [file Figure 2_Source_Data.xlsx]

## Sheet: Figures 2A-F
Figures 2A-F. Blank cells indicate that measurements were not recorded for this mouse and timepoint.
	Group	M AL Young	M AL Young	M AL Young	M AL Young	M AL Young	M AL Young	M AL Young	M AL Young	M AL Young	M AL Young	M AL Young	M AL Young	M AL Young	M AL Young	M AL Young	M AL Young	M AL Young	M AL Young	M AL Young	M AL Young	M AL Young	M AL Young	M AL Young	M AL Young	M AL Young	M AL Young	M AL Young	M AL Young	M AL Young	M AL Young	M AL Young	M AL Young	M AL Young	M AL Young	M AL Young	M AL Young	M AL Young	M AL Young	M AL Young	M AL Young	M AL Young	M AL Young	M AL Young	M AL Young	M AL Young	M AL Young	M AL Young	M AL Young
	Study	Ben_CR	Ben_CR	Ben_CR	Ben_CR	Ben_CR	Ben_CR	Ben_CR	Ben_CR	Ben_CR	Exp054_CRTC	Exp054_CRTC	Exp054_CRTC	Exp054_CRTC	Exp054_CRTC	Exp054_CRTC	Exp054_CRTC	Exp054_CRTC	Exp054_CRTC	Exp054_CRTC	Exp054_CRTC	Exp054_CRTC	Exp054_CRTC	Exp054_CRTC	Exp054_CRTC	Exp054_CRTC	Exp054_CRTC	Exp054_CRTC	Exp054_CRTC	Exp046_Del1_WT	Exp046_Del1_WT	Exp046_Del1_WT	Exp046_Del1_WT	Exp046_Del1_WT	Exp046_Del1_WT	Exp046_Del1_WT	Exp064_CR_PETCT	Exp064_CR_PETCT	Exp064_CR_PETCT	Exp064_CR_PETCT	Exp064_CR_PETCT	Exp064_CR_PETCT	Exp064_CR_PETCT
	Mouse ID	1/ 4750	6/ 4790	7/ 4791	24/ 5075	25/ 5096	26/ 5097	29/ 5100	58/ 5816	60/ 5818	78	86	88	94	96	170	172	173	292	300	313	315	A91	153	156	158	197	198	201	448110//291//3	448207//300//3	448210//303//11	469240//345//3	476354//356//1	486641//382//3	486642//383//4	0m C1	1m C1	0m C2	1m C3	3m C3	4585 C4	4587 C4
Figure 2A – body mass (g) – absolute	Week 0	26.03	27.6	25.36	23.61	23.55	26.03	23.64	25.97	24.27	21.3	24.7	24.6	23.8	23.4	24.7	26.3	22.8	25.56	23.7	25.2	25.7	22.04	20.5	24.5	22.5	23.11	24.55	23.74	26.9	24.4	23.5	25.8	22.4	25.6	27.2	25.7	23.9	24.5	24.6	23.5	23.71	22.72
Figure 2A – body mass (g) – absolute	Week 1	27.3	29.6	26.7	24.9	25	27.7	25.5	26.8	24.6	21.44	26.14	25.59	24.16	22.89				26.5	24.6	25.2	26.6	21.1	21.91	24.77	23.81	24.2	25.6	24.5	26.4	25.1	23.9	26	22	26.2	27.6	26.2	24.2	20.4	24.2	23.5	Xmas	Xmas
Figure 2A – body mass (g) – absolute	Week 2	28.45	33.12	26.26	25.13	26.11	28.61	26.06	27.12	25.95	22.02	26.17	27.62	24.63	23.94	25.63	27.3	24.91	28.6	24.7	26.4	26.7	23.8	21.54	23.18	19.74	23.2	24.1	23.1	27.5	26.1	24.3	26.1	23	25.8	28.5	26.7	24.5	19.1	24.5	25.4	25.24	24.58
Figure 2A – body mass (g) – absolute	Week 3	30.2	33.47	26.95	27	29.3	30.8	26.6	28.1	27.4	24.13	28.5	28	26.43	25.41	24.88	27.8	24.61	28.8	25.5	27.1	26.9	24.1							28.2	27.5	25.6	25.9	23.9	26.7	28.2	29.3	25.5	17.6	25.7	25.3	X	X
Figure 2A – body mass (g) – absolute	Week 4	31.9	34	27.6	27.2	27.6	30.5	26	28.5	27.8	26.4	28	29	28.3	25.9	25.6	28	25	28.4	25.04	27.1	26.9	24.3							28.2	27.1	25.3	26.8	24.9	28.1	29.4	31.9	27.6	18.8	26.1	25.7	X	X
Figure 2A – body mass (g) – absolute	Week 5	33.3	35.2	29.4	26.8	29.8	32.8	26.4	29.9	28	27.38	27.9	29.67	29.52	26.78	25.4	29.1	25												29.1	26.8	25.3	28.2	25.2	27.4	30.4	30.8	26.7	19.7	26.3	27.8	X	X
Figure 2A – body mass (g) – absolute	Week 6	33.1	36.2	30.6	27.5	30.1	32.5	27.9	30	27.9	26.48	26.38	29.2	29.4	26.1	23.7	26.6	23.6												27.6	26.9	25.6	28.2	24.4	27.94	29.62	28.3	23.9	22.3	25.2	26.5	24.3	28.4
Figure 2B – body mass (fold change vs week 0)	Week 0	1	1	1	1	1	1	1	1	1	1	1	1	1	1	1	1	1	1	1	1	1	1	1	1	1	1	1	1	1	1	1	1	1	1	1	1	1	1	1	1	1	1
Figure 2B – body mass (fold change vs week 0)	Week 1	1.04879	1.07246	1.05284	1.05464	1.06157	1.06416	1.07868	1.03196	1.0136	1.00657	1.0583	1.04024	1.01513	0.978205				1.03678	1.03797	1	1.03502	0.95735	1.06878	1.01102	1.05822	1.04717	1.04277	1.03201	0.981413	1.02869	1.01702	1.00775	0.982143	1.02344	1.01471	1.01946	1.01255	0.832653	0.98374	1
Figure 2B – body mass (fold change vs week 0)	Week 2	1.09297	1.2	1.03549	1.06438	1.1087	1.09912	1.10237	1.04428	1.06922	1.0338	1.05951	1.12276	1.03487	1.02308	1.03765	1.03802	1.09254	1.11894	1.04219	1.04762	1.03891	1.07985	1.05073	0.946122	0.877333	1.00389	0.98167	0.973041	1.0223	1.06967	1.03404	1.01163	1.02679	1.00781	1.04779	1.03891	1.0251	0.779592	0.995935	1.08085	1.06453	1.08187
Figure 2B – body mass (fold change vs week 0)	Week 3	1.1602	1.21268	1.0627	1.14358	1.24416	1.18325	1.12521	1.08202	1.12897	1.13286	1.15385	1.13821	1.1105	1.0859	1.00729	1.05703	1.07939	1.12676	1.07595	1.0754	1.04669	1.09347							1.04833	1.12705	1.08936	1.00388	1.06696	1.04297	1.03676	1.14008	1.06695	0.718367	1.04472	1.0766
Figure 2B – body mass (fold change vs week 0)	Week 4	1.22551	1.23188	1.08833	1.15205	1.17197	1.17172	1.09983	1.09742	1.14545	1.23944	1.1336	1.17886	1.18908	1.10684	1.03644	1.06464	1.09649	1.11111	1.05654	1.0754	1.04669	1.10254							1.04833	1.11066	1.0766	1.03876	1.11161	1.09766	1.08088	1.24125	1.15481	0.767347	1.06098	1.09362
Figure 2B – body mass (fold change vs week 0)	Week 5	1.27929	1.27536	1.15931	1.13511	1.26539	1.26008	1.11675	1.15133	1.15369	1.28545	1.12955	1.2061	1.24034	1.14444	1.02834	1.10646	1.09649												1.08178	1.09836	1.0766	1.09302	1.125	1.07031	1.11765	1.19844	1.11715	0.804082	1.06911	1.18298
Figure 2B – body mass (fold change vs week 0)	Week 6	1.27161	1.31159	1.20662	1.16476	1.27813	1.24856	1.1802	1.15518	1.14957	1.24319	1.06802	1.18699	1.23529	1.11538	0.959514	1.01141	1.03509												1.02602	1.10246	1.08936	1.09302	1.08929	1.09141	1.08897	1.10117	1	0.910204	1.02439	1.12766	1.02488	1.25
Figure 2C – fat mass (g) – absolute	Week 0	1.471	4.822	2.273	0.979	0.191	1.335	0.92	1.572	3.015	1.34	1.025	1.003	2.354	1.114	0.606	0.865	0.865	1.501	0.549	0.972	1.247	1.811	0.733	1.255	1.266	1.79	1.775	2.035	0.566	1.769	1.458	1.663	1.764	1.16	2.104	2.561	1.08	2.414	1.57	2.298	1.263	0.846
Figure 2C – fat mass (g) – absolute	Week 1																													1.268	2.326	1.515	2.071	0.838	1.683	2.854	2.789	1.08	1.089	2	2.3	X	X
Figure 2C – fat mass (g) – absolute	Week 2	3.898	8.589	2.536	1.629	1.178	2.397	2.244	2.522	2.854	1.518	1.824	1.454	3.375	1.104	2.032	1.432	1.467	3.472	1.309	2.289	2.226	2.715	1.947	2.89	2.74	3.335	2.59	3.392	2.434	3.26	2.675	2.046	1.964	1.789	3.863	3.419	1.471	0.93	2	3.773	1.367	1.25
Figure 2C – fat mass (g) – absolute	Week 3																													3.157	4.259	2.969	2.023	2.417	2.156	4.184	4.547	2.179	0.506	2	3.95	X	X
Figure 2C – fat mass (g) – absolute	Week 4										3.915	2.078	2.411	5.385	1.732	2.377	2.004	2.276	3.84	1.888	3.122	4.181	3.864							3.162	3.899	3.113	2.752	2.569	2.596	5.06	6.392	3.415	1.245	2.849	4.77	X	X
Figure 2C – fat mass (g) – absolute	Week 5																													3.608	3.569	2.93	4.042	2.86	2.79	5.67	6.734	2.969	1.945	2.797	2.269	X	X
Figure 2C – fat mass (g) – absolute	Week 6										6.482	3.18	4.641	7.663	2.693	2.791	1.907	2.479												2.962	3.61	3.025	4.316	3.004	3.25	5.546
Figure 2D – fat mass (fold change vs week 0)	Week 0	1	1	1	1	1	1	1	1	1	1	1	1	1	1	1	1	1	1	1	1	1	1	1	1	1	1	1	1	1	1	1	1	1	1	1	1	1	1	1	1	1	1
Figure 2D – fat mass (fold change vs week 0)	Week 1																													2.24028	1.31487	1.03909	1.24534	0.475057	1.45086	1.35646	1.08903	1	0.451118	1.27389	1.00087
Figure 2D – fat mass (fold change vs week 0)	Week 2	2.6499	1.78121	1.11571	1.66394	6.16754	1.79551	2.43913	1.60433	0.9466	1.13284	1.77951	1.44965	1.43373	0.991023	3.35314	1.65549	1.69595	2.31312	2.38434	2.35494	1.78508	1.49917	2.65621	2.30279	2.1643	1.86313	1.45915	1.66683	4.30035	1.84285	1.83471	1.23031	1.11338	1.54224	1.83603	1.33503	1.36204	0.385253	1.27389	1.64186	1.08234	1.47754
Figure 2D – fat mass (fold change vs week 0)	Week 3																													5.57774	2.40757	2.03635	1.21648	1.37018	1.85862	1.98859	1.77548	2.01759	0.209611	1.27389	1.71889
Figure 2D – fat mass (fold change vs week 0)	Week 4										2.92164	2.02732	2.40379	2.2876	1.55476	3.92244	2.31676	2.63121	2.55829	3.43898	3.21193	3.35285	2.13363							5.58657	2.20407	2.13512	1.65484	1.45635	2.23793	2.40494	2.4959	3.16204	0.515742	1.81465	2.07572
Figure 2D – fat mass (fold change vs week 0)	Week 5																													6.37456	2.01752	2.0096	2.43055	1.62132	2.40517	2.69487	2.62944	2.74907	0.805717	1.78153	0.98738
Figure 2D – fat mass (fold change vs week 0)	Week 6										4.83731	3.10244	4.62712	3.25531	2.41741	4.60561	2.20462	2.8659												5.23322	2.0407	2.07476	2.59531	1.70295	2.80172	2.63593
Figure 2E – lean mass (g) – absolute	Week 0	18.874	17.337	17.57	17.551	18.407	19.198	17.98	19.031	16.279	14.963	17.422	18.213	15.977	16.332	18.439	19.441	16.608	18.053	17.73	18.276	18.812	15.115	15.065	17.435	16.028	16.2	16.885	16.411	19.688	17.28	16.819	18.447	15.527	18.451	18.652	17.357	17.214	16.82	17.131	15.916	17.609	16.903
Figure 2E – lean mass (g) – absolute	Week 1																													19.28	17.295	16.932	18.1	12.294	18.252	18.593	17.467	17.077	14.556	16.726	15.944	X	X
Figure 2E – lean mass (g) – absolute	Week 2	18.783	18.986	18.17	18.039	19.353	20.275	18.573	19.275	17.81	15.617	12.833	19.083	16.309	17.316	17.741	19.398	17.46	18.638	17.838	18.318	18.356	15.777	16.454	17.488	16.165	16.386	17.491	16.791	19.178	17.002	16.197	18.021	16.297	17.913	18.564	17.572	17.672	13.699	17.061	16.355	18.074	18.158
Figure 2E – lean mass (g) – absolute	Week 3																													19.179	17.318	16.632	18.048	16.021	17.995	18.04	18.269	17.702	12.586	17.522	16.389	X	X
Figure 2E – lean mass (g) – absolute	Week 4										16.614	19.09	19.837	17.112	18.09	17.349	19.721	17.156	18.464	17.909	18.462	17.772	15.664							18.762	17.375	16.343	18.049	16.817	19.052	18.495	18.99	18.256	13.105	17.367	15.995	X	X
Figure 2E – lean mass (g) – absolute	Week 5																													18.899	17.39	16.368	17.974	16.52	18.2	17.944	18.363	17.653	13.459	17.307	16.551	X	X
Figure 2E – lean mass (g) – absolute	Week 6										16.569	19.051	19.032	17.307	17.769	17.402	20.494	17.777												18.643	17.37	17.116	18.046	16.351	18.475	18.556
Figure 2F – lean mass (fold change vs week 0)	Week 0	1	1	1	1	1	1	1	1	1	1	1	1	1	1	1	1	1	1	1	1	1	1	1	1	1	1	1	1	1	1	1	1	1	1	1	1	1	1	1	1	1	1
Figure 2F – lean mass (fold change vs week 0)	Week 1																													0.979277	1.00087	1.00672	0.981189	0.791782	0.989215	0.996837	1.00634	0.992041	0.865398	0.976359	1.00176
Figure 2F – lean mass (fold change vs week 0)	Week 2	0.995179	1.09511	1.03415	1.0278	1.05139	1.0561	1.03298	1.01282	1.09405	1.04371	0.736597	1.04777	1.02078	1.06025	0.962145	0.997788	1.0513	1.0324	1.00609	1.0023	0.97576	1.0438	1.0922	1.00304	1.00855	1.01148	1.03589	1.02316	0.974096	0.983912	0.963018	0.976907	1.04959	0.970842	0.995282	1.01239	1.02661	0.814447	0.995914	1.02758	1.02641	1.07425
Figure 2F – lean mass (fold change vs week 0)	Week 3																													0.974147	1.0022	0.988882	0.97837	1.03182	0.975286	0.967189	1.05254	1.02835	0.748276	1.02282	1.02972
Figure 2F – lean mass (fold change vs week 0)	Week 4										1.11034	1.09574	1.08917	1.07104	1.10764	0.940886	1.0144	1.033	1.02277	1.0101	1.01018	0.944716	1.03632							0.952966	1.0055	0.971699	0.978425	1.08308	1.03257	0.991583	1.09408	1.06053	0.779132	1.01378	1.00496
Figure 2F – lean mass (fold change vs week 0)	Week 5																													0.959925	1.00637	0.973185	0.974359	1.06395	0.986396	0.962042	1.05796	1.0255	0.800178	1.01027	1.0399
Figure 2F – lean mass (fold change vs week 0)	Week 6										1.10733	1.0935	1.04497	1.08324	1.08799	0.943761	1.05416	1.07039												0.946922	1.00521	1.01766	0.978262	1.05307	1.0013	0.994853
Additional analysis (data not shown in manuscript) – body mass relative to AL-fed mice at each week
	Group	M AL Young	M AL Young	M AL Young	M AL Young	M AL Young	M AL Young	M AL Young	M AL Young	M AL Young	M AL Young	M AL Young	M AL Young	M AL Young	M AL Young	M AL Young	M AL Young	M AL Young	M AL Young	M AL Young	M AL Young	M AL Young	M AL Young	M AL Young	M AL Young	M AL Young	M AL Young	M AL Young	M AL Young	M AL Young	M AL Young	M AL Young	M AL Young	M AL Young	M AL Young	M AL Young	M AL Young	M AL Young	M AL Young	M AL Young	M AL Young	M AL Young	M AL Young	M AL Young	M AL Young	M AL Young	M AL Young	M AL Young	M AL Young
	Study	Ben_CR	Ben_CR	Ben_CR	Ben_CR	Ben_CR	Ben_CR	Ben_CR	Ben_CR	Ben_CR	Exp054_CRTC	Exp054_CRTC	Exp054_CRTC	Exp054_CRTC	Exp054_CRTC	Exp054_CRTC	Exp054_CRTC	Exp054_CRTC	Exp054_CRTC	Exp054_CRTC	Exp054_CRTC	Exp054_CRTC	Exp054_CRTC	Exp054_CRTC	Exp054_CRTC	Exp054_CRTC	Exp054_CRTC	Exp054_CRTC	Exp054_CRTC	Exp046_Del1_WT	Exp046_Del1_WT	Exp046_Del1_WT	Exp046_Del1_WT	Exp046_Del1_WT	Exp046_Del1_WT	Exp046_Del1_WT	Exp064_CR_PETCT	Exp064_CR_PETCT	Exp064_CR_PETCT	Exp064_CR_PETCT	Exp064_CR_PETCT	Exp064_CR_PETCT	Exp064_CR_PETCT
	Mouse ID	1/ 4750	6/ 4790	7/ 4791	24/ 5075	25/ 5096	26/ 5097	29/ 5100	58/ 5816	60/ 5818	78	86	88	94	96	170	172	173	292	300	313	315	A91	153	156	158	197	198	201	448110//291//3	448207//300//3	448210//303//11	469240//345//3	476354//356//1	486641//382//3	486642//383//4	0m C1	1m C1	0m C2	1m C3	3m C3	4585 C4	4587 C4
	Week 0	1.06848	1.13293	1.04098	0.969146	0.966683	1.06848	0.970377	1.06602	0.996237	0.874324	1.01389	1.00978	0.976945	0.960525	1.01389	1.07956	0.935897	1.04919	0.97284	1.03441	1.05494	0.9047	0.841486	1.00568	0.923582	0.948621	1.00773	0.974482	1.10419	1.00157	0.96463	1.05904	0.919477	1.05083	1.11651	1.05494	0.981049	1.00568	1.00978	0.96463	0.97325	0.932613
	Week 1	1.09459	1.18681	1.07053	0.998364	1.00237	1.11063	1.02242	1.07454	0.986335	0.859635	1.04808	1.02603	0.968693	0.917773				1.06252	0.986335	1.01039	1.06653	0.846003	0.87848	0.993151	0.95466	0.970297	1.02643	0.982326	1.05851	1.00638	0.958269	1.04247	0.882088	1.05049	1.10662	1.05049	0.970297	0.817937	0.970297	0.942231
	Week 2	1.12154	1.30564	1.03521	0.990661	1.02929	1.12785	1.02732	1.06911	1.02299	0.86806	1.03166	1.08882	0.97095	0.943749	1.01037	1.07621	0.981988	1.12745	0.97371	1.04073	1.05255	0.93823	0.849138	0.913789	0.778179	0.914577	0.950057	0.910635	1.08409	1.0289	0.957941	1.0289	0.906693	1.01707	1.12351	1.05255	0.965825	0.75295	0.965825	1.0013	0.994997	0.968979
	Week 3	1.12664	1.24863	1.0054	1.00726	1.09307	1.14903	0.992341	1.0483	1.02219	0.900195	1.06322	1.04457	0.985999	0.947947	0.928175	1.03711	0.918102	1.07441	0.951305	1.01099	1.00353	0.899076							1.05203	1.02592	0.955035	0.966227	0.891615	0.996072	1.05203	1.09307	0.951305	0.656587	0.958766	0.943843
	Week 4	1.16757	1.24443	1.01018	0.995543	1.01018	1.11633	0.951622	1.04312	1.0175	0.966263	1.02482	1.06142	1.0358	0.947962	0.936982	1.02482	0.915021	1.03946	0.916485	0.991883	0.984563	0.889401							1.03214	0.991883	0.926002	0.980903	0.911361	1.02848	1.07607	1.16757	1.01018	0.688096	0.955282	0.940642
	Week 5	1.18338	1.2509	1.04479	0.952393	1.059	1.16561	0.938178	1.06256	0.995037	0.973004	0.991483	1.05438	1.04905	0.951682	0.902641	1.03413	0.888426												1.03413	0.952393	0.899087	1.00214	0.895533	0.973715	1.08033	1.09454	0.948839	0.70008	0.934624	0.98793
	Week 6	1.19813	1.31034	1.10763	0.995423	1.08954	1.17641	1.0099	1.08592	1.0099	0.958502	0.954882	1.05696	1.0642	0.944747	0.857873	0.962845	0.854254												0.999043	0.973704	0.926648	1.02076	0.883212	1.01135	1.07216	1.02438	0.865113	0.807197	0.912169	0.959226	0.879592	1.028
Additional analysis (data not shown in manuscript) – fold-change in body mass (vs week 0) for CR mice compared to relative to AL-fed mice at each week
	Group	M AL Young	M AL Young	M AL Young	M AL Young	M AL Young	M AL Young	M AL Young	M AL Young	M AL Young	M AL Young	M AL Young	M AL Young	M AL Young	M AL Young	M AL Young	M AL Young	M AL Young	M AL Young	M AL Young	M AL Young	M AL Young	M AL Young	M AL Young	M AL Young	M AL Young	M AL Young	M AL Young	M AL Young	M AL Young	M AL Young	M AL Young	M AL Young	M AL Young	M AL Young	M AL Young	M AL Young	M AL Young	M AL Young	M AL Young	M AL Young	M AL Young	M AL Young	M AL Young	M AL Young	M AL Young	M AL Young	M AL Young	M AL Young
	Study	Ben_CR	Ben_CR	Ben_CR	Ben_CR	Ben_CR	Ben_CR	Ben_CR	Ben_CR	Ben_CR	Exp054_CRTC	Exp054_CRTC	Exp054_CRTC	Exp054_CRTC	Exp054_CRTC	Exp054_CRTC	Exp054_CRTC	Exp054_CRTC	Exp054_CRTC	Exp054_CRTC	Exp054_CRTC	Exp054_CRTC	Exp054_CRTC	Exp054_CRTC	Exp054_CRTC	Exp054_CRTC	Exp054_CRTC	Exp054_CRTC	Exp054_CRTC	Exp046_Del1_WT	Exp046_Del1_WT	Exp046_Del1_WT	Exp046_Del1_WT	Exp046_Del1_WT	Exp046_Del1_WT	Exp046_Del1_WT	Exp064_CR_PETCT	Exp064_CR_PETCT	Exp064_CR_PETCT	Exp064_CR_PETCT	Exp064_CR_PETCT	Exp064_CR_PETCT	Exp064_CR_PETCT
	Mouse ID	1/ 4750	6/ 4790	7/ 4791	24/ 5075	25/ 5096	26/ 5097	29/ 5100	58/ 5816	60/ 5818	78	86	88	94	96	170	172	173	292	300	313	315	A91	153	156	158	197	198	201	448110//291//3	448207//300//3	448210//303//11	469240//345//3	476354//356//1	486641//382//3	486642//383//4	0m C1	1m C1	0m C2	1m C3	3m C3	4585 C4	4587 C4
	Week 0	1	1	1	1	1	1	1	1	1	1	1	1	1	1	1	1	1	1	1	1	1	1	1	1	1	1	1	1	1	1	1	1	1	1	1	1	1	1	1	1	1	1
	Week 1	1.02638	1.04955	1.03034	1.0321	1.03889	1.04142	1.05563	1.00991	0.991941	0.985066	1.03569	1.01802	0.993437	0.957305				1.01462	1.0158	0.978634	1.01291	0.936896	1.04595	0.989419	1.03561	1.02479	1.02049	1.00996	0.960444	1.00671	0.995292	0.98622	0.961159	1.00157	0.993026	0.997674	0.990918	0.814863	0.962721	0.978634
	Week 2	1.05031	1.15316	0.995072	1.02283	1.06543	1.05622	1.05934	1.00352	1.02749	0.993452	1.01816	1.07894	0.994481	0.983144	0.99715	0.997507	1.0499	1.07526	1.00152	1.00673	0.99836	1.03771	1.00972	0.909194	0.843089	0.964711	0.943354	0.935062	0.982402	1.02792	0.993682	0.972142	0.986708	0.968476	1.0069	0.99836	0.985093	0.749163	0.957062	1.03866	1.02298	1.03964
	Week 3	1.06647	1.11471	0.976847	1.0512	1.14365	1.08766	1.03431	0.994607	1.03776	1.04135	1.06063	1.04626	1.02079	0.998173	0.925914	0.971642	0.992188	1.03574	0.989029	0.988521	0.962136	1.00513							0.963638	1.036	1.00136	0.922778	0.98077	0.958713	0.95301	1.04798	0.980753	0.660334	0.960318	0.989623
	Week 4	1.10511	1.11086	0.981404	1.03887	1.05683	1.05661	0.991776	0.989602	1.03291	1.11767	1.02223	1.06304	1.07225	0.998095	0.934611	0.960042	0.988765	1.00195	0.952739	0.969743	0.943859	0.99422							0.945333	1.00154	0.970824	0.936705	1.0024	0.989815	0.974689	1.1193	1.04136	0.691958	0.956738	0.986173
	Week 5	1.12192	1.11847	1.01669	0.995472	1.10973	1.10507	0.97937	1.00969	1.01176	1.12731	0.990598	1.05772	1.08775	1.00366	0.901835	0.970348	0.961602												0.948705	0.963242	0.944154	0.958561	0.986604	0.938644	0.980156	1.05101	0.979724	0.705165	0.937586	1.03745
	Week 6	1.13146	1.16703	1.07363	1.03638	1.13726	1.11095	1.05012	1.02786	1.02287	1.10617	0.950303	1.05617	1.09914	0.99245	0.853759	0.899933	0.921004												0.912937	0.980949	0.969296	0.972554	0.969228	0.971115	0.968948	0.9798	0.889783	0.809884	0.911485	1.00337	0.911924	1.11223
[truncated: 164 more columns]

## Sheet: Figure 2G
Figure 2G - gWAT masses (% body mass)
	Group	M AL Young	M AL Young	M AL Young	M AL Young	M AL Young	M AL Young	M AL Young	M AL Young	M AL Young	M AL Young	M AL Young	M AL Young	M AL Young	M AL Young	M AL Young	M AL Young	M AL Young	M AL Young	M AL Young	M AL Young	M AL Young	M AL Young	M AL Young	M AL Young	M AL Young	M AL Young	M AL Young	M AL Young	M AL Young	M AL Young	M AL Young	M AL Young	M AL Young	M AL Young	M AL Young	M CR Young	M CR Young	M CR Young	M CR Young	M CR Young	M CR Young	M CR Young	M CR Young	M CR Young	M CR Young	M CR Young	M CR Young	M CR Young
	Study	Ben_CR	Ben_CR	Ben_CR	Ben_CR	Ben_CR	Ben_CR	Ben_CR	Ben_CR	Ben_CR	Exp054_CRTC	Exp054_CRTC	Exp054_CRTC	Exp054_CRTC	Exp054_CRTC	Exp054_CRTC	Exp046_Del1_WT	Exp046_Del1_WT	Exp046_Del1_WT	Exp046_Del1_WT	Exp046_Del1_WT	Exp046_Del1_WT	Exp046_Del1_WT	Exp064_CR_PETCT	Exp064_CR_PETCT	Exp064_CR_PETCT	Exp064_CR_PETCT	Exp064_CR_PETCT	Exp064_CR_PETCT	Exp064_CR_PETCT							Ben_CR	Ben_CR	Ben_CR	Ben_CR	Ben_CR	Ben_CR	Ben_CR	Ben_CR	Ben_CR	Exp054_CRTC	Exp054_CRTC	Exp054_CRTC	Exp054_CRTC
	Mouse ID	1/ 4750	6/ 4790	7/ 4791	24/ 5075	25/ 5096	26/ 5097	29/ 5100	58/ 5816	60/ 5818	78	86	94	170	172	173	448110//291//3	448207//300//3	448210//303//11	469240//345//3	476354//356//1	486641//382//3	486642//383//4	0m C1	1m C1	0m C2	1m C3	3m C3	4585 C4	4587 C4						Total N	2/ 4751	8/ 4792	9/ 4793	22/ 5073	23/ 5074	27/ 5098	28/ 5099	57/ 5815	59/ 5817	79	87	89	90
	gWAT	2.75831	5.32778	2.70588	2.04982	2.12625	2.68308	2.32975	2.87667	2.74552	2.87387	1.17134	3.23129	1.21519	1.00752	1.22034	1.25267	1.83396	1.36327	2.09854	1.89212	1.6717	2.29252	2.79081	1.83849	1.12332	2.05	3.1434	1.61564	1.79225						29	0.939655	0.970711	0.991667	1.49772	1.31696	1.08917	1.15306	0.955882	1.65385	1.09266	1.45655	1.07011	1.01309
Figure 2-figure supplement 2C - gWAT masses (g) (shown here as used to calculate % body mass in Figure 2G)
	Group	M AL Young	M AL Young	M AL Young	M AL Young	M AL Young	M AL Young	M AL Young	M AL Young	M AL Young	M AL Young	M AL Young	M AL Young	M AL Young	M AL Young	M AL Young	M AL Young	M AL Young	M AL Young	M AL Young	M AL Young	M AL Young	M AL Young	M AL Young	M AL Young	M AL Young	M AL Young	M AL Young	M AL Young	M AL Young	M AL Young	M AL Young	M AL Young	M AL Young	M AL Young	M AL Young	M CR Young	M CR Young	M CR Young	M CR Young	M CR Young	M CR Young	M CR Young	M CR Young	M CR Young	M CR Young	M CR Young	M CR Young	M CR Young
	Study	Ben_CR	Ben_CR	Ben_CR	Ben_CR	Ben_CR	Ben_CR	Ben_CR	Ben_CR	Ben_CR	Exp054_CRTC	Exp054_CRTC	Exp054_CRTC	Exp054_CRTC	Exp054_CRTC	Exp054_CRTC	Exp046_Del1_WT	Exp046_Del1_WT	Exp046_Del1_WT	Exp046_Del1_WT	Exp046_Del1_WT	Exp046_Del1_WT	Exp046_Del1_WT	Exp064_CR_PETCT	Exp064_CR_PETCT	Exp064_CR_PETCT	Exp064_CR_PETCT	Exp064_CR_PETCT	Exp064_CR_PETCT	Exp064_CR_PETCT							Ben_CR	Ben_CR	Ben_CR	Ben_CR	Ben_CR	Ben_CR	Ben_CR	Ben_CR	Ben_CR	Exp054_CRTC	Exp054_CRTC	Exp054_CRTC	Exp054_CRTC
	Mouse ID	1/ 4750	6/ 4790	7/ 4791	24/ 5075	25/ 5096	26/ 5097	29/ 5100	58/ 5816	60/ 5818	78	86	94	170	172	173	448110//291//3	448207//300//3	448210//303//11	469240//345//3	476354//356//1	486641//382//3	486642//383//4	0m C1	1m C1	0m C2	1m C3	3m C3	4585 C4	4587 C4						Total N	2/ 4751	8/ 4792	9/ 4793	22/ 5073	23/ 5074	27/ 5098	28/ 5099	57/ 5815	59/ 5817	79	87	89	90
	Body mass	33.1	36	30.6	28.1	30.1	32.5	27.9	30	27.9	26.48	26.38	29.4	23.7	26.6	23.6	28.1	26.5	24.5	27.4	24.1	26.5	29.4	28.3	23.9	22.3	25.2	26.5	24.3	28.4							23.2	23.9	24	21.9	22.4	31.4	19.6	20.4	20.8	18.67	19.91	21.68	20.63
	gWAT	0.913	1.918	0.828	0.576	0.64	0.872	0.65	0.863	0.766	0.761	0.309	0.95	0.288	0.268	0.288	0.352	0.486	0.334	0.575	0.456	0.443	0.674	0.7898	0.4394	0.2505	0.5166	0.833	0.3926	0.509						29	0.218	0.232	0.238	0.328	0.295	0.342	0.226	0.195	0.344	0.204	0.29	0.232	0.209
[truncated: 92 more columns]

## Sheet: Figure 2I
Figure 2I - gWAT histomorphometry
	AL Male					AL Female						CR male						CR Female
Cell number (based on order of counting per mouse)	Mouse_ID_78	Mouse_ID_94	Mouse_ID_170	Mouse_ID_172	Mouse_ID_173	Mouse_ID_80	Mouse_ID_81	Mouse_ID_97	Mouse_ID_92	Mouse_ID_174	Mouse_ID_177	Mouse_ID_79	Mouse_ID_87	Mouse_ID_89	Mouse_ID_90	Mouse_ID_95	Mouse_ID_171	Mouse_ID_83	Mouse_ID_99	Mouse_ID_175	Mouse_ID_176	Mouse_ID_178	Mouse_ID_179
1	3952.93	4966.6	2679	1850.81	2721.32	2798.22	1869.01	1813.37	2792.29	1532.09	2180.25	1468.77	2181.09	672.43	2620.02	593.827	1917.96	1481.01	1509	900.853	1792.68	1470.01	1231.18
2	3759.3	1392.6	1010.76	986.353	1645.8	3076.45	957.853	1622.34	1774.76	1393.39	2141.03	486.008	1177.95	664.811	3239.97	448.19	862.195	917.502	1346.8	493.67	1116.44	1345.99	915.912
3	1575.36	1529.57	2227.37	1235.52	1501.89	2351.11	411.133	1084.76	2494.31	2447.05	1544.22	976.285	402.809	429.193	1527.71	680.43	1403.41	561.252	1237.22	174.104	1878.18	1613.07	1322.25
4	2336.25	1249.91	1170.62	2491.63	1917.26	2843.51	1209.84	1629.16	2139.61	2599.28	1358.69	825.897	2624.26	994.395	1576.81	939.681	738.742	844.135	1251.14	166.344	1576.81	1187.97	1384.73
5	2296.32	4938.86	1134.21	521.183	2045.37	3765.66	1341.9	3682.15	3693	2076.41	1552.4	2410.07	2459.6	895.492	1733.14	965.578	2140.6	366.126	336.247	721.106	2697.76	920.182	2898.58
6	4542.91	5624.15	1978.35	1246.1	4496.65	899.866	1369.27	1938.54	3254.5	329.302	638.146	178.345	2306.66	1269.52	1598.26	779.424	385.596	358.93	1663.55	858.244	988.187	634.9	1850.27
7	4029.91	2992.8	1318.9	784.737	2609.86	2546.23	661.425	2653.77	2445.07	380.658	969.705	1078.47	3311.08	1721	1363.77	311.742	1584.43	146.733	2162	269.903	1805.66	1751.62	1181.13
8	5737.48	2688.68	1251.32	1487.08	2175.03	1834.02	682.871	1407.5	3721.65	2469.06	754.262	471.41	2084.03	662.977	1354.88	1274.12	736.626	154.351	874.102	820.15	2424.19	648.586	1482.1
9	1768.03	5676.62	2152.03	954.044	3035.67	2855.92	1095.27	3205.97	2639.92	3498.58	1309.02	89.104	205.143	907.343	2513.36	534.932	887.591	772.744	852.661	756.378	2805.98	1485.95	970.243
10	5611.61	5710.08	1022.47	924.979	2979.24	2106.18	1852.92	2408.31	3540.06	3202.3	480.408	311.106	1470.01	1671.9	2692.4	735.984	1684.74	1744	541.476	467.71	2303.28	988.752	1454.79
11	2714.43	3896.56	1573.99	1208.99	2724.99	3541.33	1881	2092.53	2526.34	1286.87	1494.84	115.132	3025.09	1878.6	1832.18	579.904	684.141	876.586	1514.43	731.546	2429.55	1022.47	2479.51
12	6483.09	2224.58	1249.77	1284.47	1789.29	3012.81	1450.96	1475.87	4525.85	2066.53	502.982	212.912	1062.26	1153.12	2092.49	510.427	1516	796.165	1601.59	537.69	1250.33	973.937	2127.93
13	3672.53	3259.02	1501.89	1357.42	1076.65	2258.27	1482.85	1867.67	2701.71	1172.45	608.376	803.724	2240.63	759.905	1373.08	1029.62	873.905	968.012	1178.19	515.539	1938.28	1191.78	1058.6
14	5856.33	3147.78	934.009	1065.79	2987.56	1701.25	780.504	2025	1492.72	1700.4	891.259	1465.32	3335.91	1047.44	1276.29	980.476	859.655	1429.23	853.774	1307.47	1815.96	1166.38	2240.02
15	1774.36	4080	1067.2	1827.81	1933.2	1193.75	1209.27	3601.53	2212.13	2552.44	747.348	1676.86	493.67	548.554	1412.44	626.825	661.566	2393.29	1580.29	333.252	1961.28	602.732	1298.23
16	2920.59	4472.18	1358.69	141.653	1309.31	4818.75	791.509	3482.63	2527.75	2508.56	840.467	182.201	1960.15	686.257	1004.98	356.575	659.45	987.2	2515.24	674.97	2348.57	352.299	482.834
17	4272.16	4879.67	751.863	2375.23	2440.42	2074.43	1320.45	3523.98	2319.22	1550.14	523.722	235.911	2592.79	1787.03	1304.65	654.254	483.512	2749.82	1639.05	994.395	733.522	1377.88	2054.15
18	4191.04	4655.19	2617.62	1587.25	1758.67	2730.92	766.113	2675.49	1816.1	1396.64	866.851	306.836	1664.29	902.123	1715.36	273.592	1440.24	322.671	2531.39	779.235	1785.06	1493.14	1299.23
19	4471.02	3349.1	2659.95	544.462	1787.46	2180.39	607.388	1339	1907.66	2924.35	753.274	483.667	1857.58	1474.8	1626.9	856.698	881.242	1501.33	2005.79	258.334	1588.1	1821.46	2092.18
20	3404.95	3613.46	1322.57	1454.91	2996.31	1325.39	835.529	1879.64	2098.42	1621.68	1235.8	1069.52	2912.92	914.257	2008.4	603.573	1152.13	1989.64	2069.28	314.487	1229.87	1355.3	2568.73
21	6096.51	4963.17	1265.57	924.133	3265.08	1603.34	2012.21	1582.66	1400.45	1521.36	1497.66	1280.37	2560.62	854.294	1110.79	390.965	1340.77	1761.64	1414.33	406.195	2142.01	2068.36	850.285
22	5720.27	2433.76	1386.76	1131.67	2733.18	1494.84	2128.75	3335.32	2040.99	632.502	428.769	1473.45	3338.59	658.745	1219.71	411.432	855.564	722.94	1574.58	1099.51	959.828	2000.78	1067.04
23	4396.38	2274.77	1451.66	1185.15	3511.28	1929.25	1276.15	2488.51	779.093	2125.79	828.616	163.334	2561.75	1007.66	1387.19	573.221	734.227	265.529	2107.43	1371.67	2154.71	1323.41	2362.98
24	4847.82	3790.04	1583.16	2479.5	2894.72	2284.94	865.44	2560.35	1291.25	1530.25	1230.58	622.624	1113.05	649.292	2627.22	1293.05	711.371	196.255	2255.99	156.044	1531.94	1866.47	3326.22
25	2162.87	2908.73	1484.26	1646.37	1372.51	2283.53	1551.84	1095.07	3685.39	1524.47	1559.03	1662.95	1654.83	1270.65	2880.61	982.425	901.841	771.334	1223.71	531.764	2575.58	3443.7	2278.2
26	3170	1607.63	1489.76	992.279	2045.37	492.965	1584.85	3009.24	4785.31	2629.34	1172.59	319.92	1941.38	1234.11	2136.09	963.072	1074.11	633.913	2083.89	937.254	252.126	1732.86	921.059
27	3402.47	6941.68	2042.97	851.331	1469.16	3777.94	1489.62	2568.84	3216.69	1532.93	656.205	340.853	2430.12	870.096	2849.29	992.729	1504.57	1687.42	2332.29	1085.82	2556.96	1473.53	2765.89
28	2464.61	2913.16	1714.23	1037.57	1035.59	2916.31	1267.26	2612.42	2616.64	2250.93	408.029	268.964	1465.49	995.947	2738.4	815.625	407.465	2010.24	935.504	1194.88	2820.37	1186.13	2836.38
29	3443.09	3523.24	2345.75	1206.03	2190.27	3552.62	1104.16	2529.72	2544.12	1613.07	1451.38	405.029	1522.91	1799.45	1203.35	763.412	489.861	564.215	1611.76	932.175	2762.8	866.286	2307.36
30	4748.25	3473.63	1827.95	360.906	3551.07	2917.44	3153.48	1547.99	1661.04	2114.22	1671.34	478.709	663.965	1357.28	2442.82	1195.03	666.081	1900.89	1827.43	531.059	2177	1272.9	1506.84
31	6448.52	805.39	2718.08	3692.02	1348.11	3065.16	1244.83	4401.56	1424.15	1969.04	1541.68	388.503	1695.04	1551.84	1135.77	1292.36	798.14	822.126	2796.49	2432.8	959.687	2098.84	1795.08
32	2305.68	2966.2	2330.79	1968.76	1273.89	1843.19	1367.01	967.249	1491.73	1409.76	1335.27	1497.41	1191.78	1128.85	1124.34	635.179	1295.76	2062.44	5128.08	1262.46	1599.38	2057.64	2485.66
33	5500.61	9576.47	2136.09	2036.48	827.769	3970.95	579.311	4321.08	1501.47	1182.89	879.549	1003.28	2048.19	550.529	2147.94	1075.57	1102.61	1688.41	1009.72	1718.61	1367.72	1537.87	1745.04
34	3879.52	3103.75	1493.71	2411.92	2456.22	2994.47	1222.82	1647.54	1160.03	852.178	592.574	1067.59	1869.15	627.564	1375.19	1070.28	1005.54	1120.39	2447.43	2126.92	250.01	2396.4	3118.9
35	6758.39	1764.91	2040.43	1117.42	1035.73	5515.31	1026.99	2895.9	2404.44	344.257	1891.3	598.248	857.539	1158.34	1048.29	1561.63	703.752	469.544	1555.79	1255.83	2687.6	1897.51	1000.55
36	6524.54	1401.89	3190.87	1118.55	2326.56	2382.15	1841.92	1951.62	1168.22	1016.12	862.759	1198.56	2213.69	995.665	2050.45	983.539	665.658	274.559	1778.7	762.586	1209.98	2157.53	989.259
37	3747.18	4119.03	2409.24	1251.88	2081.91	2070.06	1297.03	3644.97	1623.51	715.603	1171.6	612.709	3489.98	542.91	3589.45	1563.58	1480.45	510.46	1530.58	1755.99	1929.67	3996.06	2681.54
38	3733.27	3635.91	1126.45	2258.27	2621.72	3137.68	1102.89	3390.87	1681.22	760.188	1736.81	1334.35	1368.42	494.517	1636.91	1410.01	826.923	558.712	1709.64	1721.29	2685.63	1690.95	2684.54
39	2932.57	4553.82	1812.29	2449.87	2604.22	2630.46	1232.98	1744.86	1554.94	1048.57	900.43	1676.44	2260.53	1935.88	1365.32	1036.17	456	1121.23	1366.71	1519.11	1997.26	2622	2814.36
40	4907.87	4615.44	1652.72	1935.04	1118.84	2483.45	457.411	1278.57	1583.58	1923.61	1356.99	1340.69	1250.61	2616.78	2608.59	797.942	817.47	2512.09	991.336	211.351	1304.93	3351.85	2940.47
41	6865.94	5222.38	3013.1	1365.6	2017.01	1944.91	1395.37	970.869	1956.62	1128.57	141.512	1121.58	1265.14	792.215	2812.89	596.055	668.903	632.079	732.781	1330.19	883.076	3210.76	1747.75
42	6642.84	3287.76	1591.77	3657.59	1831.48	2407.26	758.212	1435.49	1231.42	1541.4	590.175	777.42	2042.97	1851.37	1433.61	501.237	1131.96	731.264	1016.96	1553.11	3437.35	2954.69	2728.86
43	6471.52	3352.39	1821.74	1232.84	2490.22	2507.57	609.928	2673.82	1153.83	1797.62	907.061	1659.23	3568.42	2556.39	1606.3	1114.97	674.829	2421.23	840.965	1440.1	799.128	2481.76	2658.8
44	862.667	2474.22	3118.21	1994.86	2722.31	2707.36	1207.16	2739.82	1903.01	1530.25	2571.07	2258.3	2722.45	1380.56	1615.05	863.381	1011.61	392.086	610.396	1498.37	1998.81	2787.78	2804.35
45	4354.38	2454.06	2518.3	1758.11	3074.19	3504.37	855.564	1937.28	1765.59	1085.54	1294.91	1502.37	1392.27	2465.53	1757.83	496.364	1186.42	225.742	1097.15	2862.98	1401.44	2449.3	1568.32
46	1757.97	4949.44	2448.03	2283.1	2265.18	3739.85	890.413	2377.82	1270.51	1605.59	1210.54	1245.52	1175.69	537.69	2955.11	387.206	796.024	357.096	1092.28	1303.52	2476.82	1640.16	1944.49
47	5939.24	2591.75	1182.33	3179.44	741.282	4099.34	842.725	2435.74	1867.74	385.596	477.727	1720.93	3041.6	2108.15	2296.08	1467.37	679.485	813.237	728.883	1254.85	1268.53	1772.78	2485.8
48	6907.12	3766.45	1994.86	1189.52	641.955	531.341	1138.73	2533.06	1513.32	1724.67	307.01	1119.92	976.477	2010.38	1549.58	647.153	2105.19	555.75	605.94	1585.84	1030.65	1998.24	2494.09
49	7582.63	1483.82	1094	1352.34	990.445	1141.69	511.024	2345.37	1642.98	1663.16	973.514	1103.54	1353.18	826.923	2923.79	1423.1	870.66	167.049	1633.34	1211.11	1549.86	1913.73	1102.21
50	3010.25	3878.83	1793.95	2096.86	1272.06	1416.53	1849.39	3100.29	1355.72	930.905	1382.95	1068.56	1504.86	1743.15	832.143	691.708	707.279	1534.91	1418.5	455.859	683.153	1114.18	1720.59
51	4525.56	2432.18	650.42	1308.46	1686.44	3068.55	588.341	2128.73	1266.56	642.096	2813.46	1582.52	2700.58	3116.8	1102.75	1745.98	528.802	696.133	1454.29	1672.05	1619.28	764.279	2946.19
52	6455.27	1396.89	1543.94	2335.02	2049.18	3434.39	268.351	3449.63	1621.11	2574.17	581.992	1029.86	2203.11	2025.05	1249.2	1176.79	1698.29	513.141	790.424	2780.86	1316.78	1664.99	1710.29
53	6224.59	1666.4	2558.79	1330.89	2053.69	440.057	1235.09	2711.69	1420.2	1098.8	626.012	1308.74	1232.98	2091.22	2421.65	1192.39	1014.29	1109.95	1465.28	2119.3	2092.07	2402.04	1212.73
54	5691.76	6994.16	2627.5	3159.12	2238.8	2427.44	999.192	2830.74	2338.83	746.925	726.749	758.965	1754.02	1559.6	956.866	1147.42	843.994	1084.27	1581.54	2626.8	1455.9	1737.23	1084.2
55	5384.37	1784.21	3852.72	1713.67	2976.55	1989.21	1185.01	1798.33	1943.36	1601.64	1098.24	1494.24	2965.97	1689.12	2315.41	344.74	1656.81	480.549	2010.94	2281.97	1260.91	2458.62	1743.46
56	2428.94	4811.32	3062.9	2326.28	1091.61	2745.17	2134.68	2830.6	2321.62	1288.42	1944.77	418.25	3494.49	956.866	1787.03	1098.27	515.116	831.296	2356.09	176.361	1297.6	2206.91	1357.57
57	4190.22	2822.23	3260.99	3255.77	3622.88	3118.63	2169.53	2548.79	1984.98	2166.42	1855.6	1927.23	1389.02	819.727	1383.38	1083.93	1765.87	1730.32	1872.4	233.22	2807.67	3714.87	1841.12
58	4624.85	2203.42	1872.82	960.393	2274.07	2758.15	1576.25	936.339	2007.7	2557.94	993.972	1500.72	855.281	1550	906.638	989.944	1198.27	1949.71	1750.85	1675.15	1274.74	2535.51	1305.95
59	6022.15	2156.95	3476.43	1951.54	1458.3	1792.39	1278.55	2133.32	1930.1	2037.18	445.982	1325.95	954.044	690.631	939.512	731.25	339.46	932.739	966.971	2048.05	2011.65	2470.19	1989.81
60	5845.73	1945.06	896.197	1152.41	1154.81	1822.73	1427.54	3254.84	2141.73	1577.8	2042.83	1682.37	945.861	1076.37	986.635	1339.56	975.771	730.418	1357.24	943.039	1757.26	2304.12	1145.53
61	4609.57	3147.21	1352.62	1152.41	2413.19	2207.62	395.472	1460.55	1674.3	2863.68	1282.64	1422.77	819.445	849.074	1509.37	575.588	1041.94	642.519	944.136	1721.99	1761.36	954.185	1798.8
62	5549.63	4654.05	1199.96	1277.56	2543.69	1937.86	1045.33	3034.99	2517.59	1673.17	1633.53	1644.36	636.029	1239.47	1339.5	918.935	853.871	658.603	2212.55	2126.35	1521.93	1091.32	2901.43
63	5127.66	3650.21	1405.67	2104.77	1306.91	2088.26	1072.13	1565.39	2267.02	1124.34	1177.11	1575.36	730.559	1168.78	755.249	735.287	348.772	767.524	3038.89	2060.04	1645.66	1743.15	1201.72
64	2716.22	2505.53	903.816	675.252	1132.94	650.702	960.252	1271.61	1681.64	1523.2	1192.77	826.998	673.7	680.895	1148.18	1537.41	812.39	116.257	725.123	1081.59	4385.19	1589.65	2104.05
65	5499.5	4136.76	878.702	1265.57	1707.04	384.185	1086.24	1828.68	2430.4	959.123	2247.12	1164.82	783.044	444.007	1533.21	1559.96	1735.82	692.324	2929.45	1492.02	2747.57	1452.65	1920.9
66	6211.37	3773.74	946.989	1953.94	2676.74	2274.36	2139.05	3835.02	1750.77	1725.94	1830.07	1083.7	1646.09	505.804	655.782	1129.04	926.955	1024.16	1718.83	1620.41	1920.93	1660.34	1600.63
67	2113.84	5309.89	1682.2	918.772	1995	3090.13	1388.88	891.228	1831.76	2939.59	1391.98	1738.69	1362.5	2521.4	2015.88	1345.27	1050.83	3360.74	1620.53	828.192	4687.4	1720.86	2472.5
68	5535.04	4056.26	577.759	2443.52	1567.22	632.784	1893.56	4524.36	2372.69	1144.23	587.777	1628.52	261.72	1307.75	1573.57	1283.17	1836.41	1733.56	1279.83	985.93	2842.66	760.893	1630.8
69	5249.55	3337.8	1597.97	1522.21	1872.96	2222.29	2332.2	2277.01	2143.85	1093.02	1586.12	1678.79	1552.97	1840.51	1151.57	589.232	610.492	2219.19	1458.88	333.958	3442.43	797.576	1339.98
70	4744.26	4182.37	1539.56	2125.65	2118.45	1870.84	1952.53	2447.15	2785.24	2083.04	2103.5	1101.47	992.702	2300.88	2938.88	678.898	2869.47	780.222	2608.38	763.433	2149.49	1548.45	2257.61
71	5256.29	3054.71	896.056	792.779	2634.55	2112.67	1959.44	3293.97	966.883	1965.51	1313.4	968.16	516.104	1351.49	1108.54	1044.94	1358.4	1507.68	1600.62	1600.09	1352.2	1013.58	1174.27
72	3195.48	4719.39	1441.22	1710.42	1684.88	1175.98	1631.13	3335.74	3437.21	2356.61	1143.38	1012.09	653.383	1339.36	757.225	1790.81	983.39	1992.32	2307.36	1602.49	1832.04	1218.87	1305.38
73	4694.27	4211.39	1088.92	576.631	3265.51	2019.69	2448.74	3340.61	4406.21	2496.71	1370.26	1844.05	1212.8	994.819	818.175	232.24	1745.55	2346.03	2954.66	236.042	1599.67	1406.94	2637.07
74	4102.08	2653.51	1174.99	1349.94	2216.79	2696.78	625.165	1237.08	2027.03	2858.6	506.227	1991.27	304.188	714.051	990.304	880.229	902.687	3091.12	1547.29	1525.74	1190.93	1733.98	1681.7
75	5418.53	1834.83	1457.45	1722.13	1851.79	201.052	1112.91	2806.37	4390.12	689.502	1440.66	1189.34	673.982	2142.44	1883.96	967.388	2256.01	1643.97	1689.17	862.477	3231.36	1793.24	1313.24
76	3074.28	2372.13	1248.36	1975.67	3526.94	1734.27	1229.17	1922.11	3105.93	2428.71	1025.15	3138.05	1604.75	664.247	486.757	1003.73	920.182	1837.26	1381.05	781.21	2481.9	1137.74	1232.32
77	3379.19	2895.86	1172.03	1282.92	2503.76	1480.16	1801.71	2579.98	2867.78	1279.82	1477.62	1450.86	576.349	541.641	1442.49	953.743	670.032	1253.29	1898.16	869.39	3833.25	1399.04	3091.59
78	4587.26	2915.45	1058.45	1220.7	2029.14	939.935	786.571	3040.98	2102.79	3287.23	2019.69	2416.54	728.866	716.732	1249.48	870.343	1275.16	1088.08	2132.76	463.054	2888.66	896.056	899.755
79	5401.17	2652.94	566.049	1808.9	2948.05	648.022	1005.4	1994.23	2715.26	2242.47	1628.17	1325.4	1089.91	898.314	2690.85	751.16	873.2	856.269	2192.22	3587.47	1387.89	924.697	2684.68
80	4434.39	2864.98	465.453	575.925	5672.06	1531.94	1850.38	2823.64	2567.54	2181.8	663.259	1265.36	543.334	1582.03	1022.19	1343.6	1565.66	587.353	916.847	1164.27	1931.09	509.19	1509.12
81	5406.96	3832.36	777.824	104.265	2743.48	1028.54	850.626	4416.88	3030.31	1708.73	1058.17	1819.95	975.63	2105.05	1809.75	1703.23	1690.11	1013.58	2569.96	617.405	3334.07	2302.86	2031.13
82	6382	5112.58	508.767	1491.45	578.888	1522.35	2633.43	2630.8	1524.04	1383.38	815.212	2005.18	1897.08	919.054	321.119	1543.81	1554.66	138.832	1137.95	657.757	610.069	1232.41	922.631
83	1011.82	4297.03	1548.31	658.745	2675.47	941.91	1733.98	4281.68	1977.08	1377.73	2376.22	1459.4	1716.21	2390.89	2008.68	2699.3	1809.61	729.148	2352.2	1163.56	2242.47	1840.37	2624.2
84	6343.17	4157.92	583.403	1060.42	2336.15	911.717	2660.94	5410.16	1865.48	1184.87	2621.01	1904.92	1383.38	1507.25	621.497	2044.77	1262.18	2753.92	1866.83	734.791	2148.5	865.581	2279.77
85	3659.59	4471.9	2868.2	943.744	3398.55	2241.62	946.143	3353	3208.22	895.21	1772.64	1533.91	1307.75	708.267	1158.06	2473.89	1961.98	1745.27	2255.71	4279.94	2685.07	1457.17	1141.96
86	6485.7	2297.5	2137.64	3348.75	2220.03	1610.67	609.504	2456.06	4253.97	3487.16	2448.18	1031.37	1793.81	341.153	1391	1690.7	606.683	2890.63	1931.71	1661.75	2074.86	2332.2	1236.75
87	6467.11	4091.86	2719.91	826.499	1148.89	1437.27	892.247	3668.5	3796.7	2980.93	1192.91	2307.19	1250.75	1634.38	1340.63	1917.09	888.155	4687.96	3944.18	532.329	1978.91	723.222	1851.98
88	5449.1	1383.3	2931.41	1778.14	1735.54	2884.99	360.482	2442	2941.42	1572.86	2780.86	2231.45	513.846	390.817	1294.21	1040.48	1585.98	448.804	1487.7	756.378	2428	1109.95	663.7
89	4731.31	3153.79	773.873	1344.3	1641.57	2120.14	1460.69	2534.45	2715.96	2547.22	1303.66	2004.9	190.611	1583.72	830.732	722.478	567.319	2578.54	2203.91	1879.73	2183.49	1404.54	1256.77
90	6307.22	2330.1	1298.16	1152.56	1117.14	1513.32	934.291	2962.31	2501.51	2534.52	2324.3	1741.72	443.866	1934.33	2189.7	1825.2	1441.79	2922.66	1747.65	2252.49	2852.68	1886.08	1758.76
91	6307.22	1785.64	2244.3	1176.12	2353.79	676.24	947.836	3958.11	2600.55	1059.58	4026.54	865.284	577.054	2723.3	2297.21	1354.04	833.413	1220	2359.85	1148.89	3120.89	1570.74	906.904
92	6464.22	2828.8	2894.86	910.165	1416.96	1051.96	1828.8	1672.32	1699.28	2645.14	1914.15	1436.82	1024.16	962.791	2446.34	1094.37	1133.79	3366.1	1893.7	237.735	1317.63	813.378	979.822
93	3626.54	1903.74	1661.32	755.814	2784.53	1140.28	2821.22	811.865	3605.81	2425.74	2204.52	1436.13	732.957	672.995	1934.33	796.828	492.824	2120.14	1928.23	895.774	2535.93	565.626	1289.22
94	7112.87	4866.66	2575.72	702.341	2866.22	90.297	729.994	700.062	2274.21	1318.19	1671.48	608.439	1680.51	493.529	1672.89	783.74	1222.54	2338.41	995.374	128.391	3167.31	1710.14	1106.93
95	6025.59	3910.85	804.913	439.492	2638.51	1013.02	1758.39	299.35	1959.87	1729.19	1100.21	1062.36	1189.94	1338.93	1144.94	1821.86	612.891	1117.28	2372.52	250.856	1404.96	840.185	605.508
96	4941.06	4325.92	2843.93	342.141	922.581	584.532	557.16	1195.73	3015.07	3392.34	1149.03	910.593	1345	1573.71	1290.12	2091.55	276.111	1287.3	786.943	1526.02	2143.85	1668.66	443.944
97	5158.51	3608.6	1167.51	692.042	1214.78	733.945	1628.03	520.869	4699.67	2596.46	2158.94	1430.89	1452.93	665.799	599.205	1060.54	565.767	1888.19	2283.14	350.042	2516.46	1831.19	1007.85
98	6889.36	3226.85	1862.8	1906.11	2250.51	1299.15	2484.15	594.106	1623.79	2479.22	1849.11	617.667	1294.49	557.16	2384.4	960.705	1804.81	397.589	2101.86	777.541	2627.5	653.947	186.442
99	3890.68	12542.1	1860.68	781.351	2059.48	1032.63	1020.36	250.062	1258.37	2001.91	2956.24	1172.95	1776.59	1051.11	655.076	1917.51	1048.43	1177.53	1163.98	817.046	1336.54	1382.11	802.817
100	4476.95	7651.42	2177.28	1054.5	2486.27	1277.98	1502.03	722.339	2037.18	1878.18	1905.41	1216.6	1796.77	2043.82	1044.9	2483.35	819.868	379.812	1751.96	1052.95	2419.11	1413.85	1013.57
101	4022.89	9100.78	2253.61	1095.13	1809.33	1386.76	506.933	2055.91	1513.6	1596.28	2267.02	2372.06	787.982	998.487	1695.61	1609.11	951.363	426.935	2341.75	1455.76	1937.15	347.502	528.872
102	4279.73	3373.26	4906.09	432.015	2487.12	1545.07	589.188	822.726	1550.29	1040.25	2499.53	2193.03	1093.02	158.302	1171.6	512.515	1055.49	197.948	1862.65	2115.21	2636.81	302.636	1832.82
103	4214.73	5525.78	2498.55	901.559	2111.96	1441.93	1061.27	419.09	900.289	2259.96	1179.79	1418.77	730.7	432.015	2185.19	684.885	1330.33	2773.67	2705.85	651.549	2731.34	2378.76	849.57
104	5035.53	9128.38	1440.66	922.158	1958.6	802.937	1301.83	1871.98	3764.39	2092.77	1071.15	484.217	863.747	348.772	1307.33	1856.39	832.707	2129.32	908.075	1294.07	1799.17	1665.27	1537.58
105	2603.7	3127.05	2158.52	1622.66	1517.69	1635.36	2081.77	245.189	3163.5	2558.37	2005.86	752.355	978.452	321.542	1732.71	1506.5	1070.44	627.564	1308.23	1004.55	2447.47	954.608	2938.04
106	6032.34	5277.86	1590.5	840.326	2048.47	2954.4	2940.01	2522.34	3206.11	2407.82	1340.35	874.924	1984.7	1543.94	777.683	1661.74	1275.44	2511.95	1196.15	337.485	2499.11	303.059	1462.66
107	2986.15	3452.9	2418.97	1031.08	3185.22	2546.09	2488.39	390.965	3626.27	1846.86	815.635	605.823	1434.03	1776.59	743.257	467.682	1223.38	1064.94	1357.52	404.079	2865.24	298.544	2096.19
108	3330.3	1472.66	2542.42	991.291	2431.95	2179.97	1957.75	497.478	2458.19	1764.6	1880.86	1444.25	1778	1959.59	1410.89	864.913	1755.29	1939.55	1540.89	290.502	1983.57	609.363	858.006
109	3606.7	7085.09	2973.45	1181.9	2839.13	3052.88	2378.05	1390.1	1293.79	2257.42	1213.79	1254.61	1764.46	265.953	1176.54	779.842	1655.68	1752.04	561.943	1131.53	1120.81	1739.2	833.557
110	3600.92	2736.3	1283.91	1441.22	1283.91	1953.66	1423.16	2456.9	2277.6	2544.4	236.606	1374.98	2778.75	245.636	602.591	465.594	488.168	2168.11	785.411	840.467	178.76	947.836	813.683
111	5866.39	5041.09	592.574	1890.59	1979.2	1919.23	2498.83	76.439	2319.64	2464.82	703.893	513.276	1201.51	321.683	1804.11	1231.51	1702.1	459.386	1348.47	294.171	1502.88	731.264	1237.47
112	8558.92	3216.13	2742.49	1595.58	2125.65	1213.37	1340.77	592.156	2480.63	2519	1498.79	1042.39	2421.37	1738.64	923.145	506.946	1814.4	265.953	1545.62	580.44	1623.37	228.141	3123.05
113	3327.41	3910.71	3627.54	1309.87	2011.51	3723.9	1091.32	637.964	2144.69	1692.36	1109.1	2447.12	977.182	1081.02	329.725	1698.5	1934.05	1172.73	975.881	159.854	948.682	1453.64	889.318
114	9901.12	4581.7	1613.49	859.232	3144.03	781.915	874.47	1070.56	2469.48	1315.09	1045.47	2230.9	893.376	1112.63	724.351	1491.46	660.861	1036.86	1836.62	1300.28	584.673	312.089	683.717
115	6370.16	2598.9	3008.72	171.846	1134.92	2718.78	1423.31	531.033	1073.97	376.284	597.23	2249.77	557.16	871.648	810.98	1279.96	1527.71	239.851	1796.52	571.552	2058.35	431.168	1486.25
116	6047.9	4723.25	965.895	1180.63	2961.03	1560.44	924.556	377.738	1607.85	1900.47	1436.57	1866.5	727.173	2497.28	713.205	1322.57	1736.95	1619.42	1368.38	989.739	1825.13	949.67	1635.94
117	5372.67	2819.22	1316.22	1195.59	1810.74	2023.64	849.497	310.071	1968.76	1787.17	1454.06	1951.06	1888.34	452.331	1218.59	1803.2	1473.25	2019.12	2452.86	1508.24	1135.48	985.083	689.007
118	3636.73	2610.19	1744.42	1367.58	2216.93	2362.39	2976.13	855.724	969.564	4089.18	3172.1	1930.81	459.668	1080.88	1665.84	1124.72	817.187	1375.05	1294.72	405.067	798.846	830.45	1028.58
119	3649.53	6507.75	2277.88	996.229	1474.94	1051.25	909.742	512.376	2544.12	914.962	2431.67	1208.75	488.168	1657.94	2478.93	1165.1	1168.64	597.794	1849.7	304.329	2006	1308.6	2807.21
120	3732.16	2458.78	2484.58	1635.79	1617.44	1218.16	606.259	968.502	1965.09	931.328	647.316	2518.04	1713.67	1136.61	2265.04	1522.23	933.727	617.829	1729.27	1097.11	2769.15	1649.33	1010.28
121	4360.99	3575.43	2384.12	1793.81	2380.45	3146.57	939.935	1355.99	1467.18	2664.75	2105.61	2206.8	2315.13	634.9	2008.12	1142.4	1468.45	720.4	2725.9	1115.73	1484.68	1583.16	1824.39
122	6940.86	4069.99	1560.44	1837.97	1889.04	3245.05	947.977	679.316	3221.77	1683.05	1674.3	2588	480.69	780.363	1510.92	636.85	1641.29	781.21	1335.66	2654.73	2498.55	557.16	1977.8
123	3733.82	2519.54	2122.12	1566.51	1428.53	1924.6	1242.99	610.535	2310.9	2059.48	1508.81	1280.64	1004.98	541.782	1778	1678.87	562.522	1739.35	1690.56	933.022	1593.6	1101.62	448.376
124	6649.18	8066.91	1395.23	2729.65	1269.24	1110.37	706.009	332.627	919.759	1793.66	1874.23	2024.18	1545.07	977.182	1242.01	388.181	1535.33	1002.58	359.638	1464.93	1540.13	1216.19	2882.28
125	4101.8	5749.4	2015.32	1656.53	770.91	4648.6	1344.72	1311.43	1448.28	1120.25	1294.35	1660.88	1466.62	1455.76	1081.16	2472.49	1200.1	1330.61	588.954	1029.95	2890.35	1020.07	3021.54
126	8837.8	3054.14	2015.32	1365.18	521.465	2427.15	2678.43	2263.36	2882.59	2312.87	980.145	3025.67	1570.46	1703.51	1906.96	1680.26	577.054	985.648	303.527	2051.15	1866.04	546.014	3077.3
127	8158.98	5872.64	2032.81	1056.05	911.576	1142.12	1356.15	1257.55	2032.25	2894.58	2359.71	2732.33	2934.23	2210.3	1184.16	762.995	1174.85	442.314	1149.64	1375.05	1447.71	2170.51	2838.67
128	6636.64	6198.35	2476.39	2420.66	1345.42	1089.77	582.839	779.007	3989.86	795.883	2719.21	2409.24	762.445	428.064	878.843	1547.01	877.574	496.492	421.736	724.21	1778.99	1498.51	2162.1
129	6361.35	5289.44	1140.14	1995.99	919.759	1851.37	658.886	1092.14	4227.31	1053.37	591.868	2346.99	1316.78	498.891	1102.05	2575.11	1248.64	1900.33	922.138	1196.86	1497.1	1227.33	1736.89
130	4980.58	3954.61	1798.6	2029	2002.48	1283.91	1656.24	381.358	3644.47	2435.62	3862.17	1283.26	1180.35	1151.99	1021.06	1318.67	1092.73	1120.53	933.694	2057.78	1828.09	1943.64	2884.99
131	5599.9	7001.59	3695.54	1324.68	786.148	1759.1	240.839	3887.93	1646.51	1162.57	1496.53	1630.45	672.148	1020.36	1034.89	920.049	1206.73	677.227	1656.03	1532.65	1354.03	1327.37	2327.38
132	4164.6	5710.08	2323.74	1062.12	1615.61	2934.37	1230.72	2493.38	1332.73	2312.73	992.561	1243.18	2686.33	618.252	1080.88	436.216	770.487	323.799	1078.36	1921.91	1743.44	1016.55	1029.72
133	4865.04	5748.68	3118.63	1330.05	1467.47	2319.08	2436.32	3330.86	1519.67	1254.7	1521.22	646.587	1995.14	1588.38	1326.38	718.301	1238.2	1562.14	2752.49	1629.86	715.462	1815.25	1806.8
134	7061.78	10145.8	2407.97	1298.72	1329.2	2460.45	1088.78	3527.88	1868.44	1266.98	1324.83	1662.81	1147.9	1031.92	2374.11	1293.19	584.955	1224.93	1046.47	739.73	1496.25	1988.79	2168.25
135	8534.13	3253.87	1740.05	1664	745.938	3508.18	1710.28	3567.7	1945.19	1763.61	2230.9	1635.27	1742.87	3167.59	1205.18	1086.15	1061.13	1311.7	1086.29	2130.02	1147.9	1350.5	1309.1
136	6835.78	12228.4	1093.72	1312.27	826.076	2589.12	484.782	4652.88	2782.7	1636.07	2326.84	2184.21	2720.62	932.88	304.329	1804.73	1502.6	1468.31	2429.33	735.074	1979.48	1964.24	2844.53
137	4958	8841.28	1580.76	730.7	621.356	2207.62	1385.92	2286.9	3082.8	3009.29	1276.29	2368.75	1935.04	2309.77	3156.3	1335.24	895.492	1893.27	797.942	642.378	2482.04	2189.7	2126.64
138	8376.58	7442.96	2759.7	1331.32	837.363	1792.39	1399.6	3916.06	2768.59	2219.05	1146.77	695.753	3048.65	1605.59	1972	736.541	767.524	1820.61	1813.78	1566.37	2357.17	2586.3	1301.66
139	6301.71	6073.24	4270.62	963.073	1536.18	1070.44	1628.45	5236.4	3388.53	1730.88	2115.21	907.839	2188.71	552.928	852.319	1248.64	1048.71	1660.62	1491.18	1447.57	1562	1082.01	1287.94
140	4118.74	3618.18	1807.77	1771.65	843.43	3793.04	1251.32	1281.08	2496.01	1109.66	2304.69	1927.09	1653.85	1060.99	1156.79	1011.94	1227.33	1325.39	618.611	776.272	1835	544.462	2128.93
141	6456.78	3299.48	3135.84	1803.12	694.158	2199.72	2296.36	2137.64	3491.11	1205.18	1251.74	2654.66	491.131	1167.79	1293.64	937.175	1227.9	952.915	464.341	577.195	664.388	2302.57	3565.71
142	6017.46	6476.86	2120.71	1254.42	1659.63	2380.03	1392.27	3190.51	1884.95	1893.27	1177.53	1827.11	578.465	1337.52	1092.45	1015.42	1367.15	760.329	943.997	740.717	1502.6	2810.49	1660.68
143	4872.06	3114.04	1799.31	1073.12	1212.8	2553.57	2023.92	1677.89	2424.33	1311.56	2025.19	2261.33	1543.8	924.415	1015.28	1001.64	943.744	1222.68	1655.48	1363.77	2265.47	999.616	2136.51
144	1722.86	7241.22	2829.82	1803.54	1641.15	2472.73	2839.56	7296.48	3397.28	2529.73	1434.45	2168.1	3399.96	1232.69	2223.84	953.465	1001.73	697.403	521.426	1184.87	3402.36	659.309	2016.84
145	3709.72	4844.35	3027.63	1727.92	365.138	2407.54	939.229	3523.84	1638.89	1478.75	1349.66	688.591	1526.16	1265.14	1084.41	1385.92	1506.69	1585.42	1970.42	153.646	1975.81	1171.18	3862.67
146	6944.17	3916.86	2368.46	2201.55	1211.25	3449.2	1536.88	3434.45	4095.67	1858.57	1359.25	1044.32	1248.07	662.272	1676.28	819.245	1047.3	832.284	706.606	612.185	1642.56	1051.82	3240.86
147	5456.81	5549.52	2282.96	1979.62	711.371	3114.96	1407.36	3472.32	1873.52	2140.18	1049	511.073	1839.66	461.643	1047.73	772.184	916.232	630.386	1419.76	1075.1	1240.6	962.509	3208.98
148	2780.53	7742.07	2837.72	1575.4	1399.74	1637.34	1731.44	2360.55	3150.94	1248.36	427.076	603.895	1033.48	632.22	2078.95	935.782	1007.66	905.509	1224.55	1223.81	368.242	668.197	3390.56
149	5137.58	5388.81	2135.66	1597.83	2948.62	285.423	1876.2	2974.57	1917.54	2690	1764.6	3342.84	3137.68	1393.68	1501.33	1035.19	1017.25	1034.46	516.275	586.93	1763.47	1529.26	2398.87
150	5130.28	5008.77	2251.07	935.561	3140.92	1108.25	2457.21	2229.25	3285.4	1231.57	273.148	3529.03	1838.39	1362.36	2418.26	1197.96	1346.84	1340.35	1072.93	303.482	2044.94	1336.39	3409.86
151	5345.53	2917.16	2224.55	2468.07	594.831	796.306	1289.98	3044.88	4183.29	3999.03	2067.94	1194.84	2200.42	1067.06	2504.75	816.739	1957.61	1638.61	1757.95	470.391	982.403	2063.57	1832.54
152	4441	5963.33	1671.62	2010.8	2191.68	2382.85	1150.16	1731.78	5814.7	1209.41	1904.56	1428.83	1083.42	842.725	784.596	1167.74	870.942	792.356	2669.51	223.767	2605.35	1905.69	2329.1
153	4716.85	12193.2	2271.53	3463.59	1158.2	1960.57	597.653	4645.08	2108.15	2695.79	1813.56	1451.41	975.913	1131.39	793.626	1593.66	1717.34	598.641	1219.4	342.282	3282.86	3106.36	1994.24
154	4863.52	8867.45	1914.72	2882.03	1555.51	2849.01	1312.83	5781.91	1044.9	3024.67	642.66	2308.85	3206.11	2925.62	1674.44	1866.83	607.952	1616.74	684.746	1323.84	1870.98	1047.02	1051.31
155	4357.96	7443.24	658.321	3012.81	1600.37	1434.17	1343.31	4142.59	1307.61	1965.37	2238.66	1099.27	3075.32	1068.75	1017.25	1535.6	668.903	1692.93	1265.48	892.106	1689.82	1051.54	1356.28
156	6150.36	6467.35	1685.59	1952.95	930.482	1698.15	1769.96	5944.95	1178.66	3352.84	956.301	1248	969.987	1886.64	2437.17	1389.54	2410.93	1471.56	2077.07	327.75	2144.13	1577.94	1291.23
157	2441.74	8014.37	1769.4	2795.68	1292.8	1680.51	942.192	2989.32	1354.74	2295.94	2476.68	1547.27	778.952	468.415	1092.03	362.144	2838.43	1248.36	557.905	587.636	3217.82	1197.14	1927.9
158	6902.72	3437.79	808.722	2874.41	1802.41	2752.79	913.269	5703.25	3354.81	968.294	1620.41	1219.63	778.952	1071.99	2115.35	645.9	1541.82	1828.94	2060.78	1541.54	955.878	1397.63	513.002
159	5961.27	9906.54	729.994	1729.89	799.692	779.517	1253.29	8336.55	3089.14	2514.35	287.257	1306.4	778.952	1132.8	1648.62	1506.36	1745.41	424.255	1418.5	329.725	2123.11	1634.38	3246.15
160	6511.73	5052.47	977.182	1127.02	1176.96	2641.75	705.022	4158.32	4022.31	3378.94	1494.84	1096.79	1553.53	1464.36	792.779	1439.53	1497.66	453.037	1348.47	296.992	652.396	2104.2	1427.63
161	3611.8	7719.89	586.225	1516.71	1208.99	2133.97	515.116	782.766	737.472	2902.48	1795.92	1660.74	1469.72	323.517	1227.9	1154.66	1470.29	593.844	1609.81	756.378	1316.08	2597.45	4284.88
162	3778.3	9445.54	1368.85	1927.42	1120.81	2723.72	1872.82	899.164	2573.46	2965.97	1011.33	1167.44	303.2	2156.69	855.987	1700.17	1094.85	1494.98	1531.7	257.205	1329.48	741.705	940.218
163	4860.35	4845.99	617.688	3152.35	2040.43	1074.53	520.759	2066.07	893.234	4298.98	1801.14	647.827	1472.69	1865.48	866.145	2183.17	1141.55	2503.06	1163.01	387.289	921.17	1134.64	1255.34
164	5873.82	6527.92	496.21	2221.02	2221.45	286.552	1466.9	1085.88	2481.9	2916.73	1642.98	1285.74	1432.76	1232.27	759.2	2199.04	584.814	2359.71	1492.99	693.594	1025.15	3016.62	2291.35
165	5898.61	5545.5	1320.88	2154.99	1415.83	946.284	1623.79	1538.8	2306.1	3716.99	1906.11	1318.52	1042.79	1813.7	1464.79	1201.02	503.829	731.829	1716.32	1336.54	1472.55	407.747	2565.01
166	4772.77	7088.89	1700.97	1453.22	2326.7	711.512	387.995	2090.58	2907.7	1876.62	587.636	1167.3	1224.65	588.2	1108.82	996.07	853.871	610.633	1409.59	873.764	1413.15	921.029	829.124
167	3701.18	7780.6	1386.34	1113.19	2724.43	1726.51	934.291	1917.79	4431.75	2851.55	978.029	548.119	1400.45	592.856	199.641	1039.93	1389.44	1665.41	1731.5	772.603	1325.11	2754.9	1627.37
168	3973.86	3196.78	1384.22	3457.67	848.086	1723.12	125.005	1022.25	2478.79	3263.39	1018.8	943.921	2729.23	1892.14	1114.04	1167.19	1576.39	933.022	812.422	296.287	1814.12	2420.24	891.748
169	5108.66	4742.96	1632.54	3225.86	659.591	1808.62	400.128	1086.57	4873.64	3533.43	1396.22	1338.35	1806.36	257.064	1110.79	1076.83	588.482	699.096	1772.57	558.854	1438.97	3173.37	1803.51
170	5298.85	4681.98	1360.38	1254.56	2525.49	1437.7	1144.51	2287.03	3732.23	1539.42	1715.08	1043.22	2945.66	843.571	942.192	669.57	958.135	2452.27	1218.84	535.292	870.801	2451.99	1423.05
171	5271.03	4676.13	2063.28	1659.49	748.618	2152.59	150.824	1120.4	3363.28	1557.48	1775.89	591.362	1945.76	1758.53	1302.82	1520	1022.89	1051.68	848.205	667.492	1234.53	2134.82	1532.86
172	3698.56	6996.72	2308.64	3278.63	2270.69	1644.53	586.084	1735.95	2537.49	2746.58	948.259	1989.89	762.586	1260.21	1555.79	981.451	1387.61	3146.28	2715.87	2290.44	3048.23	2719.49	1095.2
173	4296.81	3793.53	1561.71	1894.97	2174.61	1704.21		834.421	1159.33	3459.22	1690.95	1417.53	278.651	2276.05	2326.98	965.857	1713.38	2310.9	1796.1	410.71	2602.24	1300.13	259.075
174	3872.5	3395.74	1938.56	1545.35	2325.57	1809.47	2070.62	1717.57	1311.42	2809.36	1967.06	1396.05	2038.74	1769.26	616.841	768.286	2232.31	239.569	1057.89	450.779	1345.99	1172.59	256.787
175	5575.52	5349.73	2030.69	1750.49	2449.87	1504.57	508.485	2327.55	1850.52	2587.57	1041.66	1851.62	1332.87	1540.27	317.027	509.452	1082.86	1220	892.899	144.898	1423.73	1316.36	1238.61
176	2193.03	7694.97	2069.21	1919.94	1377.31	965.049	653.101	1097.71	4360.92	3283.7	2230.48	107.42	462.631	2871.87	470.109	1062.76	2598.72	1166.95	1883.68	514.41	2041.42	2426.45	905.188
177	4969.43	3267.93	1036.58	635.465	1305.64	3020.86	1192.34	2118.7	1991.19	1653.85	1714.8	1565.31	541.641	1132.38	1208.99	1202.55	2247.55	1086.1	1232.49	1405.25	2495.44	1286.87	1244.9
178	2389.28	4395.02	996.37	1578.93	903.393	3786.55	381.505	2059.81	2775.93	1515.01	1072.28	939.79	688.938	1624.64	1303.38	1265.21	1392.83	3244.2	1825.76	1368.14	1750.07	1195.31	2261.33
179	3664.55	1495.78	1088.36	2049.03	1223.81	2456.08	184.544	3087.62	3103.39	971.257	1647.5	422.795	2547.08	727.455	1094	752.274	2221.73	905.368	1598.25	968.576	2501.51	2092.91	1844.12
180	5639.29	6421.97	809.286	3295.98	2912.78	1441.37	2208.47	2082.78	2192.1	1335.83	1207.58	1895.69	2724.99	375.861	852.178	2154.62	1341.05	740.012	1743.33	1137.04	1989.78	1383.66	769.217
181	5361.51	1338.44	3117.22	2422.92	1740.76	1199.82	895.774	1618.86	3864.71	1923.61	1405.67	304.357	1618.29	798.987	1006.39	1126.53	490.849	851.19	1180.55	1167.51	2539.6	1782.94	680.857
182	3532.06	3231.45	1163.42	2578.54	3495.48	1812.01	313.923	1030.6	1993.45	1736.1	1228.74	551.975	2018	298.121	1110.37	1410.29	1065.36	853.73	1714.79	832.707	1882.83	762.022	2746.16
183	4404.78	2133.04	1960.86	2509.69	1767.56	1438.26	1098.38	644.09	2842.66	1570.46	1047.02	1121.3	922.722	373.604	906.779	661.355	230.398	1145.36	2245.96	1032.91	1720.72	1489.19	1211.59
184	5252.99	4510.72	2597.45	2139.19	2673.78	2615.37	245.918	859.901	2325.29	2534.38	1539.7	911.42	3713.18	1172.45	2215.38	510.148	1064.23	1970.59	1031.57	1378.58	1205.04	1932.5	3791.04
185	2046.36	4128.39	2589.41	1827.81	1173.72	2369.87	1707.18	1122.35	1330.75	1231.99	1648.62	2427.97	1425.7	608.376	1177.39	1233.18	1803.12	2071.75	782.905	1529.12	2132.98	963.356	1495.11
186	5042.56	747.679	3031.58	759.341	2104.62	5374.22	1212.24	1469.32	1944.49	2507.29	1781.81	1368.37	1907.52	1244.4	788.405	829.966	1513.6	2125.36	1927.82	546.297	4246.92	2696.78	1075.33
187	4435.49	4500.69	2287.62	1522.63	411.698	2677.16	2980.93	1430.06	1691.38	2457.21	999.757	2165.76	1574.69	1549.16	563.227	798.36	796.588	689.502	1757.67	1020.64	618.393	864.311	1976.37
188	3063.41	2417.08	1688.27	826.923	3726.44	851.472	1868.02	1792.76	1514.03	1793.24	1462.81	1931.64	898.737	418.752	1618.86	734.034	72.52	912.846	1964.85	850.626	1193.19	1620.41	1151.25
189	3665.51	2768.22	3170.97	2054.54	1081.16	2465.95	2351.11	779.703	1231.99	1536.88	1362.36	147.634	2227.37	622.061	990.727	729.161	600.334	1294.63	1196.29	480.408	2600.98	1473.82	1424.34
190	1930.26	2308.34	886.744	1603.48	1304.79	1721	2836.88	686.417	1208.43	2303.84	1119.4	1809.76	1314.38	1291.25	1240.31	651.191	505.099	1813.28	2517.74	590.74	1361.51	3146.71	2531.12
191	3142.73	3172	4298.98	1434.45	1673.03	1980.33	2421.51	858.648	875.88	2152.17	1538.58	1021.59	1495.97	753.697	827.205	1608.69	1872.39	3023.11	1167.05	830.591	1414.13	810.556	1228.75
192	2936.15	2868.89	3686.37	1502.17	1840.08	1101.34	2442.39	1934.5	1426.13	1430.5	769.076	451.578	1356.57	1496.11	1669.79	782.348	383.198	1498.22	962.097	1216.19	1126.31	966.601	372.027
193	6330.5	995.513	3892.08	2099.97	1598.82	953.621	1611.66	2492.54	894.786	1526.87	1173.15	1907.67	1042.93	1330.33	541.641	346.411	419.175	857.539	1454.01	1614.2	2289.03	1211.67	1911.46
194	6097.75	5924.21	1176.12	3017.89	1371.53	1117.85	1534.48	1959.14	1588.38	926.673	1481.29	1192.92	2007.84	1859.41	867.133	426.47	546.579	1333.86	758.818	883.217	2009.11	1732.57	1651.67
195	5655.13	4878.02	2671.52	472.507	957.994	1395.65	2009.95	1709.78	561.957	3209.21	1328.78	1556.49	999.898	2515.9	1380.13	632.534	2617.48	2301.16	893.177	1273.05	2719.49	951.504	2496.52
196	5467	3068.41	2363.24	541.076	942.192	2458.48	1755.71	1049.95	1722.27	1858.99	1382.11	2257.34	2464.26	2021.1	1802.41	824.396	448.945	500.584	2010.66	1601.22	962.509	2805.41	2903.58
197	4894.92	3591.51	1963.39	924.133	1676.28	2133.41	2095.03	2633.72	1321.44	1813.28	2262.78	887.457	530.071	1978.49	2910.1	2040.87	1508.66	1159.61	551.222	104.829	732.534	2059.9	2728.58
198	3020.85	2167.85	1604.04	1949.99	1437.13	730.982	1157.07	1890.92	1238.06	1879.73	1941.53	1784	1963.82	1652.29	1121.66	1876.02	509.613	2281.83	415.749	1231	1693.21	2501.23	490.984
199	5420.45	2921.38	2771.97	1865.34	2394.84	2102.51	2706.37	1586.28	1931.93	2924.78	1789.71	766.54	1086.53	707.843	1892.14	911.556	900.994	1184.87	1417.67	466.722	1495.54	1487.78	2652.08
200	4465.24	6978.34	1641.01	2908.69	1611.94	2065.26	2129.74	1666.75	1966.5	1372.09	1202.08	1078.33	1003.85	1219.71	2749.54	868.672	2264.2	2279.86	882.874	1187.55	685.41	1837.68	888.603
201	3698.15	2670.34	1931.79	2656.71	1459.42	2492.62	1320.73	2206.28	1849.82	3259.86	2384.97	2362.42	879.126	930.482	1624.64	1572.21	1297.17	2039.44	2143.07	1629.3	528.519	1309.02	1119.94
202	5950.81	5728.86	1952.95	1517.55	2055.67	2125.65	767.242	2481.68	1811.02	739.73	1720.86	1018.43	2763.65	810.98	864.593	684.189	2492.2	1228.04	1316.17	1030.23	937.819	1829.22	693.01
203	5937.31	2221.87	1490.61	2025.76	1707.18	1064.38	640.826	820.08	1241.87	2801.46	2506.87	375.42	1046.03	761.739	1894.4	1500.23	1746.68	1043.21	1515.41	1577.38	732.957	1744.42	2765.18
204	3307.03	4497.91	4299.26	2145.96	1395.79	2515.05	2596.32	1311.01	2114.22	1768.41	1613.49	562.717	1199.82	480.408	1321.44	1557.73	1536.88	1820.33	1140.32	1487.78	566.896	1238.62	1323.68
205	2528.37	3201.65	1589.65	1802.84	2059.9	2137.07	636.029	2184	2310.05	2895.99	1752.61	489.451	1845.87	2322.89	1317.49	1713.54	594.267	332.123	1598.11	834.682	1332.16	2382.71	281.951
206	4371.04	4147.74	1795.08	2405.28	1236.64	3530.61	1376.18	1618.58	1712.96	1246.38	1867.17	2462.54	1702.52	1051.11	222.356	1135.3	2303.28	984.237	1776.05	702.905	1171.74	2521.4	1083.77
207	4853.74	3010.21	1357.84	2055.38	2787.21	1194.6	1345.71	1786.63	2648.52	4111.33	1756.7	1483.36	2020.68	1290.4	897.608	1012.08	459.95	1161.87	2000.22	1959.3	949.811	402.386	722.749
208	3606.02	6232.33	1532.09	2106.32	1489.48	2095.74	2892.75	1028.23	1223.95	2593.22	1072.28	1535.28	1646.65	2727.39	1108.39	2191.8	1933.06	1786.75	1443.15	1112.2	932.457	1336.96	1713.58
209	2365.04	2711.83	1600.94	1975.11	2682.24	1462.39	2312.31	1696.69	1496.67	3306	1647.5	1893.63	2691.27	619.804	670.314	821.751	2176.3	2841.25	1322.29	324.081	651.972	2163.6	670.42
210	5398.69	4509.05	1659.63	2001.77	621.92	1721.43	1979.34	1898.44	2446.06	4436.12	1207.58	1436.95	1096.54	838.069	1234.39	654.393	2271.53	2223.99	1360.44	568.306	1790.42	2095.59	612.657
211	3617.72	4207.47	1307.47	2653.74	1444.89	2054.11	2686.9	998.437	1439.81	3947.81	1405.67	1388.2	3004.49	1303.94	2540.73	1604.1	932.739	1983.15	1054.97	1303.38	2341.8	2869.47	2951.33
212	5499.09	3887.65	828.757	1776.73	2083.04	3833.53	2816.42	1052.32	1425.7	3321.8	1228.74	1528.81	3088.72	1533.64	1066.49	728.744	1476.64	2403.45	1323.55	1030.51	1366.02	1639.31	1338.12
213	6749.85	4873.7	1181.76	2783.12	1826.12	1013.72	2896.42	1783.15	1335.12	3479.68	1047.02	1097.06	2276.05	1138.45	3233.9	1586.56	2920.97	2602.67	2126.22	1388.74	2667.57	1566.37	1700.57
214	6971.02	4593.28	967.871	1875.36	2074.86	2753.21	2713.71	1113.44	1355.87	1918.39	1539.7	1152.43	1117.28	1671.06	2461.86	1169.55	1205.89	2735.29	1703.09	1127.16	1982.72	1513.18	3162.8
215	3786.15	4944.57	486.475	1694.2	1203.77	1492.3	1101.62	1686.25	1137.04	2414.6	1648.62	2504.55	707.843	691.336	714.757	2144.6	319.99	2350.26	1658.82	422.562	800.116	1593.46	2077.89
216	1763.9	7047.54	1155.24	1788.73	1679.52	2027.03	1805.66	823.282	2073.87	4614.74	1781.81	1574.81	186.237	1345.14	1598.26	735.009	1259.64	3324.34	1502.32	698.814	905.932	1365.74	1795.36
217	2620.5	6670.64	1004.27	1620.41	1563.55	1765.16	2162.47	2329.08	2157.82	1926.99	999.757	551.837	1235.38	863.747	1620.27	579.486	1202.5	2104.62	1821.16	1439.81	699.237	2595.76	2477.79
218	4796.45	2197.65	2222.29	2035.91	2113.37	1687.42	1542.53	1179.02	1410.89	4375.45	1462.81	2256.1	2368.46	1030.65	2249.24	1008.04	1175.13	1743.86	1433.4	728.16	701.636	1778.14	3372.26
219	4566.88	3296.75	1899.34	1966.22	3343.24	806.888	1368.42	1672.32	2086.28	1652.15	1362.36	1573.02	2018.56	1995.14	2368.46	1872.4	845.97	2074.01	1488.4	1172.87	1164.97	1179.5	2689.69
220	6952.29	5041.61	1190.09	2933.8	992.279	1394.38	1553.81	1599.5	2386.24	1495.83	1119.4	1264.12	2333.75	314.911	496.774	2710.44	728.301	1151.71	1117.76	993.69	1049	1049.84	2321.66
221	3961.74	5495.37	1056.9	3895.33	2223.84	1152.27	1852.22	454.734	2070.48	1426.41	1538.58	1794.06	1274.46	1314.53	1428.67	1217.31	1887.35	230.681	1937.84	1008.79	2347.86	620.509	1635.94
222	6638.57	4692.7	1279.11	1263.17	1892.43	1795.08	3688.77	2239.84	2057.92	1082.72	769.076	831.268	1627.32	285.282	2572.19	1612.31	1502.46	1141.69	1764.49	1880.29	2203.39	1438.12	754.776
223	5986.06	3855.49	1493.14	1049.84	2428.85	1430.64	1298.3	466.569	1378.02	987.2	1173.15	2353.33	1415.55	1564.25	784.455	1009.44	785.584	1784.49	1539.22	620.227	2446.91	1505.84	997.123
224	3836.83	5134.2	1422.46	1859.98	1318.05	1468.74	1958.88	1534.9	2646.41	813.942	1481.29	2381.56	1447.43	1534.34	1828.94	1373.53	1911.9	1879.31	871.457	716.45	1453.36	2799.77	3334.08
225	3820.03	3239.39	1833.17	1854.05	1494.84	2206.91	1520.09	1259.22	2444.09	1665.7	1328.78	1683.06	489.72	2602.53	1488.63	1478.23	297.98	2405.43	1710.89	373.604	1787.88	2166.7	532.447
226	1835.65	4797.26	715.886	2502.35	1144.09	1825.83	2099.69	1531.98	840.467	1490.89	1382.11	2312.84	795.46	477.727	513	1296.12	793.343	967.165	1454.01	1035.45	1513.46	1592.75	868.586
227	4358.92	6128.6	984.237	1220.14	694.017	1596	974.502	901.531	1545.63	642.378	2262.78	3023.61	1245.25	814.225	1165.96	1174.15	1006.95	2940.58	1417.67	849.215	2103.78	2354.63	1935.2
228	5771.22	5486.32	1534.2	733.522	599.487	946.284	1525.74	1368.93	2155.28	999.474	1941.53	1312.32	2574.87	1952.81	1800.15	1746.81	823.536	2220.6	1553.56	991.856	1094.71	2050.02	1676.26
229	6919.1	5355.58	1545.49	2033.23	824.383	1083.42	2303.7	1471.27	1719.31	1312.83	1789.71	1518.07	3837.06	1070.87	743.398	1310.74	554.339	2377.91	1733.72	693.17	626.294	2918.57	589.924
230	4930.86	4016.3	1964.66	1573.71	687.244	1359.67	2050.45	629.053	2855.22	730.418	1202.08	2861.51	1633.11	1197	522.17	1185.98	778.388	1324.12	1207.42	456.846	669.891	1571.17	1665.68
231	4274.91	5575.85	1964.66	1094.14	1904.98	2219.75	2196.19	643.672	2445.78	1984.7	2384.97	2245.63	594.831	1874.65	1314.1	564.728	272.302	2051.01	1661.46	1596.99	1469.16	1447.29	2783.91
232	4820.41	3234.51	1605.59	1588.94	2830.53	2970.21	2853.24	726.655	1808.9	507.497	1720.86	2246.32	1819.91	896.338	660.014	1399.15	371.487	724.774	1023.64	920.324	1108.54	894.363	3939.16
233	5282.74	6139.6	996.229	1227.9	1095.98	3091.97	4192.18	1053.71	965.049	887.168	2506.87	946.675	768.653	885.616	1627.6	1015.01	349.477	1523.2	1426.86	945.437	1279.82	1892.57	1064.89
234	5534.76	2465.39	1451.66	1620.69	1899.06	1354.03	2035.35	568.208	2972.46	1659.77	1613.49	2747.89	768.653	1170.33	261.579	1196.29	576.207	1459	1915.56	540.935	2178.7	2054.11	1334.69
235	4268.3	3112.68	1433.46	2609.44	1307.61	2077.68	2185.75	1227.89	2145.68	1274.17	1752.61	2009.31	2664.47	685.41	1029.38	1539.08	686.539	1315.8	1339.56	771.898	2184.9	1311.42	2970.78
236	7496.42	2298.73	1248.5	1479.88	1455.33	2702.56	2261.37	1354.45	1864.49	97.492	1867.17	762.822	2651.06	1257.1	1379.14	1217.17	974.361	1454.77	1109.41	763.433	2876.8	2008.68	1259.63
237	1785.91	7345.08	1833.03	2595.9	1530.82	573.103	3223.74	2151.01	289.091	2737.83	1756.7	2989.31	808.722	1233.54	2130.44	1571.38	1400.87	2099.12	1715.76	884.064	947.272	2155.98	2521.4
238	4736.75	3480.54	1468.6	1405.95	1045.05	333.534	1748.38	2056.47	1887.49	1203.35	1665.27	1602.77	537.972	1722.13	1168.36	1854.16	599.487	2399.78	1989.63	1134.07	1787.17	1587.11	1875.43
239	4021.39	4655.1	1281.09	2210.72	875.88	1526.87	1576.25	2803.45	1103.88	1128.99	1016.4	1955.6	2132.28	881.524	1052.52	1199.35	1205.75	1033.34	1326.61	894.786	2325.29	1613.49	960.806
240	2597.64	3697.04	881.383	2040.01	975.489	1003	569.153	3495.3	2107.3	1337.81	1545.49	2526.99	2538.76	1587.82	1921.49	1850.12	2234.28	684.705	973.375	674.97	2494.88	1638.89	650.832
241	4566.33	3929.7	3484.47	2758.15	1666.68	2185.33	2616.49	4327.63	2008.54	1296.18	1148.61	2027.08	3028.19	1657.37	962.227	1485.61	676.381	1436.14	1278.57	1338.93	1815.39	1113.76	1377.87
242	6008.28	3645.25	3301.2	2302.29	1738.92	868.826	2616.49	1889.66	2421.65	419.881	1349.38	958.106	3607.22	1641.29	2580.38	1841.35	771.898	1500.06	1145.61	492.118	1434.03	2199.44	658.696
243	5100.33	5253.11	3267.62	2771.83	3076.87	1059.86	676.098	2185.95	1568.35	1848.55	1062.4	616.978	2661.08	1089.63	960.675	1738.46	1130.69	863.606	1265.07	818.175	1643.55	1559.03	1363.14
244	7022.97	3320.56	2140.74	2568.67	1839.8	2305.68	1196.86	2407.61	747.631	323.376	837.081	746.02	2151.47	495.222	603.014	901.67	1271.92	3041.74	2912.75	959.687	2144.55	2043.39	2220.29
245	3673.02	4198.28	2494.59	1889.46	2126.78	1308.88	2438.3	2019.15	1228.04	1104.87	352.722	2367.65	3989.43	430.039	1403.27	1117.48	1041.1	1600.23	1890.92	1433.75	900.712	1326.8	2731.72
246	3015.51	4035.8	2855.92	1297.17	1653.7	2528.46	2116.48	3213.77	1086.95	2483.31	627.141	1946.23	871.507	448.522	1096.68	1589.76	801.527	2430.82	1821.58	1387.61	960.816	1386.34	4162.06
247	1920.51	7258.2	3611.17	2118.88	1022.89	255.371	3282.43	1999.66	1922.9	1911.19	1369.55	608.715	2085.58	583.262	681.037	1507.33	1259.92	974.784	1434.51	904.522	1785.34	955.878	2670.67
248	1907.15	3502.81	2417	4873.64	1447.71	1484.96	2067.52	866.862	2810.35	5862.39	2860.3	2035.06	1697.16	1116.3	1807.49	2127.47	1767.7	2727.96	1255.74	810.838	1433.75	3175.35	2500.24
249	5311.68	3266.82	1402.14	3753.25	892.388	1084.27	2690.57	3165.87	1174.42	2524.65	1356.29	1272.24	1439.39	972.526	507.356	1802.23	1579.49	998.346	1343.46	434.836	722.658	2018.56	1137.24
250	4921.38	3362.61	3450.47	3180.29	1319.89	908.754	879.126	2626.62	2985.72	944.45	884.487	1899.96	1791.41	1233.82	1960.71	515.857	193.292	1559.74	180.167	453.46	748.9	1086.1	1137.95
251	2370.79	3603.06	2049.46	4819.6	2373.54	493.811	2257.99	2280.77	1592.75	2789.05	1803.96	625.241	489.156	871.225	1167.79	1557.32	347.925	3563.63	2351.08	838.069	2312.31	2722.74	2602.33
252	2932.79	5918.78	2396.11	2866.22	1711.83	1956.76	800.116	3934.43	3158.98	2252.63	1539.85	2191.37	2437.17	2724.15	761.598	1651.86	329.866	723.928	2931.54	345.527	2492.9	2483.45	4290.31
253	4230.9	3725.59	2712.44	1921.49	2191.11	1343.45	1047.16	2779.08	2794.41	4647.75	1661.32	2408.14	1710.42	1049.14	1245.25	1234.71	2086.99	725.762	1457.07	619.099	1871.69	917.784	2813.36
254	4422.64	7334.64	3386.7	5170.21	845.687	1674.59	2819.1	2357.9	2464.26	2474	1447.86	1606.21	1279.39	1612.93	1581.89	463.645	1789.43	1791.69	2740.38	743.398	1645.1	917.784	902.472
255	2466.87	5377.72	2556.96	9377.48	1655.68	2254.18	1446.59	2360.69	2755.75	1405.95	1659.35	2271.11	1157.07	885.757	1312.41	1009.3	1399.46	1087.09	1437.44	1066.91	1743.44	697.826	2702.27
256	4463.57	3812.61	2419.96	3317.43	1005.26	4893.11	698.814	2130.4	2353.22	2146.81	1659.35	2155.43	2492.34	2167.27	1425.56	1146.86	814.789	1142.26	1830.49	731.264	2687.32	1383.66	1818.95
257	3418.03	5549.12	2974.01	2937.05	1645.52	1713.95	1646.65	1624.43	3896.74	1682.91	1986.67	1859.61	2025.62	2227.37	770.064	649.799	2192.95	810.697	550.387	576.207	1078.91	1400.73	1818.95
259	6835.07	2852.46	1951.4	1233.96	1455.47	2197.88	911.717	1152.43	3642.92	1872.96	1165.54	1867.18	1532.51	2682.38	1165.11	598.004	1204.05	1404.4	2657.11	71.955	877.574	1359.39	1773.63
260	4214.12	2837.56	2604.64	2385.25	1591.2	2333.33	1890.17	2431.14	3528.64	2423.06	1024.59	1728.23	2215.52	1904	1913.31	1028.23	1086.53	2229.35	2469.43	1726.79	883.923	1923.61	2169.96
261	5250.14	6030.72	1670.49	3114.4	1831.76	2069.07	1772.5	3275.31	2005.02	2537.06	1431.49	2095.52	2029.14	1916.69	594.126	1265.07	559.277	480.69	1902.61	1066.63	1772.36	1696.6	398.906
262	5197.12	5301.56	2826.01	896.479	1486.23	3010.56	2794.41	2353.87	1620.41	866.851	2677.3	1530.88	1592.61	2231.89	857.398	662.33	903.816	1764.88	2484.74	800.116	1488.07	1696.6	1902.6
263	4467.27	4239.35	3335.34	7414.37	3446.1	2340.81	653.665	1495.78	999.474	896.338	1031.92	1939.49	1796.49	2476.39	1790.98	821.89	702.764	295.864	1584.19	1087.8	2196.76	1189.38	1810.23
264	4582.11	7682.58	2662.49	1344.72	2720.9	2744.18	2803.72	2270.33	3962.63	1217.6	1004.55	1207.24	2383.28	1523.76	1394.66	800.031	1220.7	3090.41	3004.78	904.38	1918.11	1157.35	2518.83
265	6566.72	3416.63	2223.7	1679.66	2018	580.581	477.586	3731.3	4450.51	2180.39	1924.6	1777.25	1204.48	929.212	1144.94	723.731	969.987	1718.18	2252.92	887.591	1918.25	875.88	2111.77
266	4622.76	5710.63	1428.1	1063.95	1503.87	2387.93	1732.86	3773.48	2984.88	1702.24	2098.98	2570.79	597.089	1241.87	1815.82	351.005	580.017	1780.83	2370.99	560.97	1447.29	1621.11	2013.12
267	4784.65	3853.4	2559.49	3157.43	2186.17	2033.66	2921.25	2518.16	1808.62	733.945	767.806	1725.2	2211.01	268.21	598.076	1077.8	1940.68	2976.13	1280.52	1049.42	2274.64	932.316	1833.4
268	4614.52	4770.81	2785.24	3587.61	1508.95	1400.59	845.546	2518.02	3836.07	2091.08	1798.6	2624.5	1049.56	2043.53	1899.48	1272.31	2312.31	1936.02	2996.15	1556.35	1056.47	1488.07	823.977
269	4724.95	4593.42	2247.69	2719.49	2406.55	1804.67	1625.77	728.047	1575.12	2150.05	771.757	2033.41	1815.96	1594.59	1333.29	1547.43	1625.63	941.91	3658.06	267.928	1784.07	2386.8	1236.32
270	3452.14	6279.04	1212.94	2761.39	990.021	2511.67	817.187	1200.18	3016.62	1762.77	1551.7	2092.91	3116.51	2038.03	1273.05	776.5	1326.38	2674.34	1311.85	262.849	2151.18	1529.69	1569.89
271	5232.94	3783.6	4136.73	2800.47	630.103	911.858	914.257	1754.47	2869.75	1751.2	1368.56	2566.66	1327.93	1280.81	1039.12	922.973	1368.7	1101.34	1648.24	516.527	923.004	1093.72	2138.37
272	4613.09	4219.24	1705.34	4198.67	1366.16	1114.18	2333.47	1014.17	2754.62	1878.88	1527.43	2703	2246	1549.72	738.46	1355.43	1189.52	1670.63	2760.15	2236.54	1838.81	1220.98	1704.86
273	3671.74	3736.27	2300.46	1941.1	1710.99	984.801	1617.73	2235.24	2767.32	3636.57	1598.54	1650.83	617.547	422.138	2738.82	1559.82	1130.4	791.933	2486.55	1104.3	965.895	1070.44	709.739
274	3218.76	2533.82	1026.56	3202.44	1263.59	2266.59	1057.46	1585.02	1074.82	1596.14	852.742	2576.99	2223.28	2287.19	1174.71	1684.71	594.126	1252.59	4365.08	1074.25	1732.71	915.668	1777.63
275	6203	3457.83	2270.26	1961	463.477	1557.62	1639.6	2438.94	2404.16	3070.38	2256.01	1327.88	3257.89	348.349	821.42	1197.54	831.155	3041.74	3543.89	1977.64	1204.76	4308.86	1217.88
276	6279.61	4614.09	1860.96	1987.24	1923.47	1931.79	1693.63	658.57	2773.81	2936.63	1362.36	2353.33	2687.04	2107.3	655.217	909.328	1196.01	1600.23	2267.68	1031.78	1012.74	2897.55	1728.59
277	4600.02	5321.2	733.24	2215.94	2042.97	964.625	911.717	491.213	1088.22	2435.9	802.655	1836.61	1188.25	1499.92	783.185	1343.18	2436.47	2430.82	2556.45	391.24	1574.13	1395.23	3201.54
278	5174.24	3031	910.729	2182.36	685.975	3131.33	1650.32	1161.76	1450.11	891.965	1536.88	783.066	1929.53	769.64	1008.36	1116.37	785.16	974.784	1354.04	405.349	1517.98	1807.07	2413.17
279	3399.84	3643.74	1458.72	1484.4	899.019	637.863	1113.62	2505.07	1392.69	2667.15	906.779	1520.55	1294.63	1395.37	1231.71	1381.88	1228.32	2727.96	1146.72	866.71	1815.53	1428.67	779.797
280	2911.89	5513.51	1961	2568.24	997.499	907.908	949.454	372.169	1203.77	667.351	1237.77	1865.53	1569.76	584.391	1349.52	1163.15	1710.56	998.346	1736.79	1080.04	1914.01	2209.03	1855.27
281	4305.09	3642.18	2524.08	984.801	2377.77	1889.46	874.549	626.686	3905.63	2287.34	1866.75	1906.85	1585.13	1676.98	1386.9	1259.36	786.571	1559.74	1733.17	587.918	870.801	1720.58	957.804
282	4233.17	2064.07	2207.48	1483.13	3512.27	2013.9	1428.59	3573.41	1045.05	3212.45	1258.37	2814.96	683.435	876.022	1391.28	569.388	1084.97	3563.63	1985.18	999.333	2359.29	1680.79	3130.77
283	4302.25	3649.57	2710.88	1009.63	2686.76	931.187	1662.4	692.682	2189.42	2187.16	1408.63	1949.54	2360.98	1312.83	1123.21	1247.08	343.128	723.928	3546.12	1244.12	1491.03	1858.57	2301.36
284	3876.98	4467.41	2695.36	1138.45	1755.71	2379.47	937.514	1133.21	671.16	2492.34	1669.22	2407.87	2014.33	1346.13	1560.87	841.006	1662.31	725.762	3023.3	825.653	2356.47	1741.32	2186.84
285	4276.95	3382.5	700.366	1909.36	807.452	1885.65	1422.05	1664.66	2865.52	2616.07	1171.74	1580.73	960.675	2091.22	1048.15	2719.73	2073.59	1791.69	2873.62	1272.06	437.799	2001.63	2371.99
286	5685.35	2445.13	3348.47	1988.37	2774.66	2027.87	523.337	1422.54	691.618	2465.95	1579.21	947.226	638.71	934.997	1580.06	1580.39	580.44	1087.09	677.506	489.861	1464.64	1530.96	1214.02
287	5658.35	6564.31	1937.01	1201.37	1984.42	2967.24	1556.93	858.648	1173.01	1763.47	1043.07	722.195	1278.69	2264.34	963.92	1809.51	426.653	1142.26	2605.88	559.7	1538.58	1806.93	848.283
288	5439.74	7753.82	711.935	998.91	1686.58	2524.08	2138.26	572.385	2227.65	2273.65	1347.26	2099.93	1507.68	2864.11	467.851	2148.35	700.084	810.697	2494.35	638.71	1505.28	1755.01	2218.43
289	5301.59	5208.49	1298.72	3826.76	782.762	1220	556.312	1777.86	1228.04	2291	1712.12	1249.11	1947.45	1727.07	1269.8	1422.76	800.539	1404.4	1672.88	1666.54	1536.18	1782.38	3171.66
290	5788.4	4298.98	2355.06	2097.71	2132.84	1783.65	1760.33	2232.32	2636.81	2042.83	688.938	2083.82	1577.66	686.68	276.252	927.423	678.92	2229.35	1333.57	1633.25	2158.38	1876.77	1994.67
291	5356.45	6711.27	3505.78	952.492	3073.76	1431.21	1786.76	797.803	3852.86	1014.99	1114.74	1642.43	1596.42	742.975	1384.65	1741	708.549	480.69	1578.48	1266.84	1297.17	1543.23	761.496
292	6110.33	5721.45	1922.48	2256.58	1618.29	943.744	1931.17	1165.93	3899.42	689.643	2000.64	1769.54	1685.31	2480.91	656.628	968.215	936.69	1764.88	1635.29	1445.46	2785.38	1504.01	724.894
293	3610.06	6013.97	3908.87	2672.93	1967.2	2454.95	1127.83	2456.76	4470.4	3012.67	532.752	1375.26	2342.5	1641.57	1180.07	974.611	917.502	295.864	893.456	428.205	1467.47	1067.06	2598.47
294	4347.73	3686.38	2672.37	1262.75	2502.5	2718.93	945.9	2653.77	3010.84	2141.59	1347.54	729.081	2541.3	747.631	1107.69	909.088	1668.8	3090.41	1031.57	1415.12	2792.86	2996.17	1867.57
295	2130.59	6648.73	3690.89	1718.46	1095.13	1867.74	1950.64	1021.69	1996.13	654.935	1489.34	2399.47	1866.04	944.591	1502.17	433.934	1077.64	1718.18	1802.51	1467.47	1618.15	2577.84	2081.89
296	4289.74	4290.73	1589.79	2167.83	2159.79	3699.64	3679.28	2384.22	2685.49	6865.25	1449.69	1385.86	1833.45	1314.38	1401.01	1677.75	1130.4	1780.83	921.302	1135.06	1283.77	1979.76	797.384
297		6517.4	1147.76	1215.06	1854.05	2626.8	2176.35	1658.54	1401.86	2482.32	2935.64	1680.16	2524.79	1292.8	1819.06	452.412	992.279	2976.13	1230.68	2071.19	2296.51	1875.36	1137.38
298		4657.01	2243.03	3163.92	2277.03	865.299	1588.91	2509.81	2818.53	2012.49	1587.96	2065.77	1404.26	587.212	1102.75	1783.92	1459.85	1936.02	1052.88	566.613	1721.14	1844.17	2078.6
299		7569.34	2370.15	3071.93	3403.77	2601.12	918.611	1212.16	4149.99	2471.17	952.069	970.363	2124.52	1319.32	718.284	659.359	560.688	941.91	1289.71	1506.83	1522.49	1857.3	2967.2
300		6352.81	717.296	2706.65	1779.84	1533.36	1733.75	2411.51	2696.78	3654.35		2031.07	1815.39	933.445	2155.13		2165.15	2674.34	917.821	838.774	428.911	1345.71	1984.81
301		5095.35	2448.74	673.982	1408.35	2268.43	2033.79	4634.5	1891.16	2451.28		2089.88	866.71	1957.75	329.725		1034.18	1101.34	2927.23	740.576	2131.57	2408.81	2633.78
302		4812.79		1232.27	1656.38	828.898	3619.72	3562.13	1950.13	2667.57		1161.93	928.507	2202.12	1231.85		1839.8	1670.63	1171.78		865.017	1265.14	2098.33
303		4701.36		1049	1488.35	4155.07	1009.72	2760.84	1876.06	1133.09		987.853	1165.25	499.314	829.321		2147.8	791.933	2509.25			3296.54	2849.11
304		3194.6		1544.22	2339.68		568.109	2483.49	3249.14	2866.79		683.909	1177.95	1355.58			1585.7	1252.59	1396.22			1789.01	856.719
305		4945.83		1799.73	2581.22		884.499	3194.83	3426.2	1720.44		1216.05	1180.35				1796.77		1006.37			2809.22
306		5973.03		1148.46	2406.13		1412.38	2272.83	1198.69			1198.7	1659.07				1445.03		1287.9			2869.89
307				1571.31	2396.82			2197.65	3455.69			955.352	2298.62				2486.27		1179.3			1639.6
308								3805.92	2396.11			1189.47	703.329				383.762		1253.65			1854.33
309								2550.6				1798.33	1632.68						2307.09			1872.67
310								2259.74				1584.59	1855.32						603.295
311								2255.43				763.648							1151.04
312								1651.58				2423.7							1909.02
313								3161.42				1739.8							911.834
314								2853.85				2365.04							1842.19
315								1445.1				1675.48							1030.74
316								2852.6				2248.8							2136.11
317								1594.07
318								1968.19
319								2252.51
320								1369.07
321								2213.52
322								816.182
323								1854.16
324								1683.04
325								2296.5
326								2068.44
Median	4694.27	4080	1803.54	1661.75	1748.23	1926.92	1372.73	1959.14	2098.42	1865.97	1394.1	1450.86	1526.16	1153.12	1291.88	1085.04	1061.13	1228.04	1530.58	904.451	1732.71	1553.74	1736.89

## Sheet: Figure 2J
Figure 2J - Plasma NEFA (mg/dL)
M AL Young	M CR Young	F AL Young	F CR Young
19.5201	42.7643	31.2723	55.7727
25.7344	30.0086	28.8044	41.9392
31.3912	52.9183	32.8035	42.4287
40.2369	22.0177	30.2762	29.26
32.2519	55.7849	39.6867	33.918
27.6564	37.5278	48.5723	16.8812
31.0493	58.4785	30.69	42.8136
27.0055	35.9797	24.7904	25.5092
34.3623	36.063	27.1573	20.5125
20.8631	38.8864	31.0494	29.5066
40.5344	35.9234	23.4579	23.1423
27.3501	28.6124	21.1963	26.3683
17.83	31.3825	21.1612	35.4676
	33.9247	23.1774

## Sheet: Figure 2L
Figures 2L and Figure 2-figure supplement 3C: quantification of bands for P-HSL, total HSL and beta-actin from Western Blots
Signal strength (Raw signal values from LI-COR analysis)												Data normalised by ladder intensity within each gel
Gel number	Lane number	Sex	Diet	Mouse ID	pHSL	totalHSL	ActB	pHSL/HSL	pHSL/ActB	HSL/ActB		Gel number	Lane number	Sex	Diet	Mouse ID	pHSL	totalHSL	ActB	pHSL/HSL	pHSL/ActB	HSL/ActB
1	1	na	na	ladder	435091	318376	2303.36					1	1	na	na	ladder	1.02214	1.0533	0.970934
1	2	Male	AL	627	95912.5	58960	364.105	1.62674	263.42	161.931		1	2	Male	AL	627	0.225323	0.195061	0.153481	1.15514	1.46808	1.27091
1	3	Male	AL	684	115022	50459	1620.41	2.27952	70.9834	31.1396		1	3	Male	AL	684	0.270217	0.166937	0.683051	1.61868	0.395602	0.244399
1	4	Male	AL	591	93392	37585.2	303.316	2.4848	307.903	123.914		1	4	Male	AL	591	0.219401	0.124346	0.127857	1.76445	1.71599	0.97254
1	5	Male	AL	594	125201	37767.2	403.27	3.31508	310.466	93.6526		1	5	Male	AL	594	0.29413	0.124948	0.16999	2.35402	1.73028	0.735032
1	6	Male	AL	595	134036	30668	478.941	4.37057	279.86	64.0329		1	6	Male	AL	595	0.314885	0.101461	0.201888	3.10351	1.55971	0.502561
1	7	Male	AL	656	2585.5	16250.5	571.758	0.159103	4.52202	28.422		1	7	Male	AL	656	0.00607399	0.0537626	0.241012	0.112978	0.025202	0.22307
1	8	Male	AL	664	10823	24613	556.121	0.439727	19.4616	44.2583		1	8	Male	AL	664	0.0254259	0.0814287	0.234421	0.312248	0.108463	0.347361
1	9	Male	AL	683	38314.5	25483.2	715.535	1.50352	53.5466	35.6143		1	9	Male	AL	683	0.0900104	0.0843079	0.301619	1.06764	0.298424	0.279518
1	10	Male	CR	590	292595	62361.2	355.43	4.69194	823.216	175.453		1	10	Male	CR	590	0.68738	0.206314	0.149824	3.33172	4.58792	1.37704
1	11	Male	CR	597	186622	48972.5	794.59	3.81075	234.866	61.6324		1	11	Male	CR	597	0.438422	0.162019	0.334942	2.70599	1.30895	0.483721
1	12	Male	CR	602	58422	23130	263.246	2.52581	221.929	87.8646		1	12	Male	CR	602	0.137248	0.0765224	0.110966	1.79356	1.23685	0.689604
1	13	Male	CR	634	175282	41296	677.496	4.24453	258.72	60.9539		1	13	Male	CR	634	0.411781	0.136622	0.285584	3.01402	1.44189	0.478396
1	14	Male	CR	642	91360.5	41778.2	551.605	2.1868	165.627	75.7394		1	14	Male	CR	642	0.214629	0.138218	0.232518	1.55283	0.923065	0.59444
1	15	Male	CR	676	176715	55068	603.346	3.20903	292.892	91.2711		1	15	Male	CR	676	0.415148	0.182185	0.254328	2.27872	1.63234	0.71634
1	16	na	na	ladder	416244	286152	2441.27					1	16	na	na	ladder	0.977862	0.946696	1.02907
1	17	Female	AL	592	13552	49699	661.178	0.272682	20.4968	75.1674		1	17	Female	AL	592	0.031837	0.164422	0.278705	0.19363	0.114232	0.58995
1	18	Female	AL	563	2360.5	34146	374.738	0.0691296	6.29906	91.1196		1	18	Female	AL	563	0.00554541	0.112967	0.157963	0.0490886	0.0351057	0.715151
1	19	Female	AL	660	16787	35218.5	744.531	0.476653	22.5471	47.3029		1	19	Female	AL	660	0.0394369	0.116516	0.313841	0.338469	0.125659	0.371256
1	20	Female	AL	671	22760	35681.5	516.523	0.637866	44.0638	69.0801		1	20	Female	AL	671	0.0534689	0.118047	0.217729	0.452945	0.245575	0.542174
1	21	Female	CR	570	4889.5	36678.5	150.727	0.133307	32.4395	243.345		1	21	Female	CR	570	0.0114867	0.121346	0.0635356	0.0946606	0.180791	1.90989
1	22	Female	CR	610	47915	47686	217.164	1.0048	220.64	219.585		1	22	Female	CR	610	0.112564	0.157763	0.0915409	0.713505	1.22966	1.72341
1	23	Female	CR	643	56031.5	55444	440.512	1.0106	127.196	125.863		1	23	Female	CR	643	0.131632	0.183429	0.185688	0.717619	0.708887	0.987832
1	24	Female	CR	661	11466.5	58172	306.398	0.197114	37.4235	189.857		1	24	Female	CR	661	0.0269377	0.192454	0.129156	0.139969	0.208567	1.49009
1	25	Female	CR	687	133365	67825	145.156	1.96632	918.772	467.255		1	25	Female	CR	687	0.313309	0.22439	0.0611875	1.39627	5.12047	3.66725
1	26	Female	CR	659	65501	53492.8	311.969	1.22448	209.96	171.468		1	26	Female	CR	659	0.153878	0.176973	0.131504	0.869499	1.17014	1.34577
2	1	na	na	ladder	620688	1240234	6530.93					2	1	na	na	ladder	0.962371	18.9346	0.12209
2	2	Male	AL	620	447	14125	174.09	0.031646	2.56764	81.1363		2	2	Male	AL	620	0.00069307	0.215646	0.00325446	0.00321393	0.21296	66.2616
2	3	Male	AL	580	9831	25398	945.633	0.387078	10.3962	26.8582		2	3	Male	AL	580	0.0152429	0.38775	0.0176778	0.0393111	0.862262	21.9343
2	4	Male	AL	651	20671.5	20588	1038.43	1.00406	19.9064	19.826		2	4	Male	AL	651	0.032051	0.314316	0.0194126	0.101971	1.65104	16.1913
2	5	Male	AL	721	42719.8	20813.8	1028.92	2.05248	41.5192	20.2288		2	5	Male	AL	721	0.0662366	0.317762	0.0192347	0.208447	3.4436	16.5203
2	6	Male	CR	582	40310.2	13259.5	614.227	3.0401	65.6277	21.5873		2	6	Male	CR	582	0.0625007	0.202432	0.0114824	0.308749	5.44316	17.6297
2	7	Male	CR	619	130552	26374.7	641.185	4.9499	203.611	41.1344		2	7	Male	CR	619	0.20242	0.402662	0.0119864	0.502705	16.8875	33.5933
2	8	Male	CR	663	120934	22843.5	1066.44	5.29402	113.4	21.4204		2	8	Male	CR	663	0.187507	0.34875	0.0199361	0.537654	9.4054	17.4934
2	9	Male	CR	701	152151	27119	751.07	5.61049	202.579	36.1071		2	9	Male	CR	701	0.235909	0.414024	0.0140406	0.569795	16.8019	29.4876
2	10	Male	CR	608	153937	28363	1198.99	5.42739	128.388	23.6556		2	10	Male	CR	608	0.238678	0.433016	0.0224142	0.551199	10.6485	19.3189
2	11	na	na	ladder	693858	1347320	7493.04	0.514991				2	11	na	na	ladder	1.07582	20.5695	0.140076	0.0523018
2	12	Female	AL	583	32700	19627	1006.38	1.66607	32.4927	19.5026		2	12	Female	AL	583	0.0507011	0.299644	0.0188134	0.169204	2.69495	15.9272
2	13	Female	AL	586	26357	17019	643.193	1.54868	40.9784	26.4602		2	13	Female	AL	586	0.0408663	0.259828	0.0120239	0.157282	3.39875	21.6093
2	14	Female	AL	593	26337	15775	634.573	1.66954	41.5035	24.8592		2	14	Female	AL	593	0.0408353	0.240836	0.0118628	0.169556	3.4423	20.3018
2	15	Female	AL	599	4578.5	18053.8	748.385	0.253604	6.11784	24.1236		2	15	Female	AL	599	0.00709892	0.275626	0.0139904	0.0257557	0.507414	19.701
2	16	Female	AL	607	2516.5	20784	1095.6	0.121079	2.29691	18.9704		2	16	Female	AL	607	0.00390181	0.317308	0.0204814	0.0122966	0.190506	15.4925
2	17	Female	AL	657	5680.5	20916	1144.07	0.271586	4.96517	18.2821		2	17	Female	AL	657	0.00880757	0.319323	0.0213874	0.027582	0.411811	14.9305
2	18	Female	AL	685	5581.25	19432	954.685	0.28722	5.84617	20.3544		2	18	Female	AL	685	0.00865368	0.296667	0.017847	0.0291697	0.484882	16.6228
2	19	Female	CR	584	59703.5	19593.5	888.073	3.04711	67.2282	22.0629		2	19	Female	CR	584	0.0925698	0.299133	0.0166017	0.30946	5.57591	18.0182
2	20	Female	CR	585	33370	21212.8	648.706	1.57311	51.4409	32.7001		2	20	Female	CR	585	0.0517399	0.323854	0.012127	0.159763	4.26651	26.7052
2	21	Female	CR	600	102199	26403.3	598.359	3.87069	170.798	44.1261		2	21	Female	CR	600	0.158458	0.403097	0.0111858	0.393102	14.166	36.0365
2	22	Female	CR	632	18299.5	12449.5	949.146	1.4699	19.28	13.1165		2	22	Female	CR	632	0.0283732	0.190066	0.0177434	0.149281	1.59908	10.7119
2	23	Female	CR	662	14168.5	31149.8	906.076	0.454851	15.6372	34.3788		2	23	Female	CR	662	0.0219681	0.475561	0.0169383	0.0461941	1.29695	28.0761
2	24	Female	CR	686	854	3681.25	971.307	0.231986	0.879227	3.79		2	24	Female	CR	686	0.00132412	0.0562014	0.0181577	0.0235602	0.0729232	3.09518
2	25	Female	CR	598	29727	27900.5	415.029	1.06546	71.6264	67.2255		2	25	Female	CR	598	0.0460915	0.425955	0.0077586	0.108207	5.9407	54.9011
2	26	na	na	ladder	620325	1338045	7596.32					2	26	na	na	ladder	0.961809	20.4279	0.142006
ladder average, gel 1	425668	302264	2372.32
ladder average, Gel 2	644957	1308533	7206.76
Data arranged by sex and diet
			Normalised by ladder bands									Figure 2L		Figure S4C		Figure S4C
Sex	Diet	Mouse ID	pHSL	totalHSL	ActB	pHSL/HSL	pHSL/ActB	HSL/ActB	Sample excluded?	Reason for exclusion?	Average of pHSL/HSL	pHSL/HSL Normalised by its Ave.	Average of AL pHSL/ActB	pHSL/ActB Normalised by its Ave.	Average of HSL/ActB	HSL/ActB Normalised by its Ave.
Male	AL	627	0.225323	0.195061	0.153481	1.15514	1.46808	1.27091	No	na	1.07622	0.786835	1.20533	0.00234144	5.38376	6.51547
Male	AL	684	0.270217	0.166937	0.683051	1.61868	0.395602	0.244399	No	na		1.10258		0.000630945		1.25293
Male	AL	591	0.219401	0.124346	0.127857	1.76445	1.71599	0.97254	No	na		1.20187		0.00273683		4.98582
Male	AL	594	0.29413	0.124948	0.16999	2.35402	1.73028	0.735032	No	na		1.60347		0.00275962		3.76821
Male	AL	595	0.314885	0.101461	0.201888	3.10351	1.55971	0.502561	No	na		2.11399		0.00248757		2.57643
Male	AL	656	0.00607399	0.0537626	0.241012	0.112978	0.025202	0.22307	No	na		0.0769562		4.01945e-05		1.14359
Male	AL	664	0.0254259	0.0814287	0.234421	0.312248	0.108463	0.347361	No	na		0.212691		0.000172987		1.78078
Male	AL	683	0.0900104	0.0843079	0.301619	1.06764	0.298424	0.279518	No	na		0.727234		0.000475956		1.43298
Male	AL	620	0.00069307	0.215646	0.00325446	0.00321393	0.21296	66.2616	Yes	Very low loading		0.0021892		0.000339649		339.697
Male	AL	580	0.0152429	0.38775	0.0176778	0.0393111	0.862262	21.9343	No	na		0.0267772		0.00137522		112.448
Male	AL	651	0.032051	0.314316	0.0194126	0.101971	1.65104	16.1913	No	na		0.0694584		0.00263324		83.0065
Male	AL	721	0.0662366	0.317762	0.0192347	0.208447	3.4436	16.5203	No	na		0.141986		0.00549219		84.6928
Male	CR	590	0.68738	0.206314	0.149824	3.33172	4.58792	1.37704	No	na		2.26944		0.00731726		7.05954
Male	CR	597	0.438422	0.162019	0.334942	2.70599	1.30895	0.483721	No	na		1.84322		0.00208763		2.47985
Male	CR	602	0.137248	0.0765224	0.110966	1.79356	1.23685	0.689604	No	na		1.22171		0.00197265		3.53532
Male	CR	634	0.411781	0.136622	0.285584	3.01402	1.44189	0.478396	No	na		2.05303		0.00229967		2.45254
Male	CR	642	0.214629	0.138218	0.232518	1.55283	0.923065	0.59444	No	na		1.05773		0.00147219		3.04745
Male	CR	676	0.415148	0.182185	0.254328	2.27872	1.63234	0.71634	No	na		1.55217		0.00260341		3.67239
Male	CR	582	0.0625007	0.202432	0.0114824	0.308749	5.44316	17.6297	No	na		0.210308		0.00868128		90.3805
Male	CR	619	0.20242	0.402662	0.0119864	0.502705	16.8875	33.5933	No	na		0.342423		0.0269338		172.219
Male	CR	663	0.187507	0.34875	0.0199361	0.537654	9.4054	17.4934	No	na		0.366229		0.0150006		89.6816
Male	CR	701	0.235909	0.414024	0.0140406	0.569795	16.8019	29.4876	No	na		0.388122		0.0267973		151.171
Male	CR	608	0.238678	0.433016	0.0224142	0.551199	10.6485	19.3189	No	na		0.375455		0.0169833		99.0401
Female	AL	592	0.031837	0.164422	0.278705	0.19363	0.114232	0.58995	No	na		0.131893		0.000182188		3.02444
Female	AL	563	0.00554541	0.112967	0.157963	0.0490886	0.0351057	0.715151	No	na		0.0334372		5.599e-05		3.66629
Female	AL	660	0.0394369	0.116516	0.313841	0.338469	0.125659	0.371256	No	na		0.230552		0.000200412		1.90328
Female	AL	671	0.0534689	0.118047	0.217729	0.452945	0.245575	0.542174	No	na		0.308528		0.000391667		2.77951
Female	AL	583	0.0507011	0.299644	0.0188134	0.169204	2.69495	15.9272	No	na		0.115255		0.00429816		81.6524
Female	AL	586	0.0408663	0.259828	0.0120239	0.157282	3.39875	21.6093	No	na		0.107134		0.00542065		110.782
Female	AL	593	0.0408353	0.240836	0.0118628	0.169556	3.4423	20.3018	No	na		0.115495		0.00549012		104.079
Female	AL	599	0.00709892	0.275626	0.0139904	0.0257557	0.507414	19.701	No	na		0.0175438		0.000809272		100.999
Female	AL	607	0.00390181	0.317308	0.0204814	0.0122966	0.190506	15.4925	No	na		0.00837597		0.000303837		79.424
Female	AL	657	0.00880757	0.319323	0.0213874	0.027582	0.411811	14.9305	No	na		0.0187878		0.000656796		76.5424
Female	AL	685	0.00865368	0.296667	0.017847	0.0291697	0.484882	16.6228	No	na		0.0198692		0.000773336		85.2185
Female	CR	570	0.0114867	0.121346	0.0635356	0.0946606	0.180791	1.90989	No	na		0.0644791		0.000288343		9.79123
Female	CR	610	0.112564	0.157763	0.0915409	0.713505	1.22966	1.72341	No	na		0.486012		0.00196118		8.83524
Female	CR	643	0.131632	0.183429	0.185688	0.717619	0.708887	0.987832	No	na		0.488814		0.0011306		5.06422
Female	CR	661	0.0269377	0.192454	0.129156	0.139969	0.208567	1.49009	No	na		0.0953417		0.000332643		7.63911
Female	CR	687	0.313309	0.22439	0.0611875	1.39627	5.12047	3.66725	No	na		0.951086		0.00816662		18.8005
Female	CR	659	0.153878	0.176973	0.131504	0.869499	1.17014	1.34577	No	na		0.592269		0.00186626		6.89921
Female	CR	584	0.0925698	0.299133	0.0166017	0.30946	5.57591	18.0182	No	na		0.210792		0.00889299		92.3719
Female	CR	585	0.0517399	0.323854	0.012127	0.159763	4.26651	26.7052	No	na		0.108824		0.00680464		136.907
Female	CR	600	0.158458	0.403097	0.0111858	0.393102	14.166	36.0365	No	na		0.267766		0.0225933		184.745
Female	CR	632	0.0283732	0.190066	0.0177434	0.149281	1.59908	10.7119	No	na		0.101684		0.00255037		54.9155
Female	CR	662	0.0219681	0.475561	0.0169383	0.0461941	1.29695	28.0761	No	na		0.0314656		0.0020685		143.935
Female	CR	686	0.00132412	0.0562014	0.0181577	0.0235602	0.0729232	3.09518	No	na		0.0160483		0.000116305		15.8677
Female	CR	598	0.0460915	0.425955	0.0077586	0.108207	5.9407	54.9011	No	na		0.0737066		0.00947479		281.456
