# Supplementary material for: The effects of caloric restriction on adipose tissue and metabolic health are sex- and age-dependent
Source: eLife journal article supplement (doi:10.7554/elife.88080), 2023-04-18
Supplement: supp [file Figure 3-figure supplement 1_Source_Data.xlsx]

## Sheet: Fig 3-fig supp 1
Figure 3-figure supplement 1: Data from Indirect Calorimetry at weeks 1 and 3
Readout	Time period	Female AL	Female AL	Female AL	Female AL	Female AL	Female AL	Female AL	Female AL	Female AL	Female AL	Female CR	Female CR	Female CR	Female CR	Female CR	Female CR	Female CR	Female CR	Female CR	Female CR	Male AL	Male AL	Male AL	Male AL	Male AL	Male AL	Male AL	Male AL	Male AL	Male AL	Male CR	Male CR	Male CR	Male CR	Male CR	Male CR	Male CR	Male CR	Male CR
Figure 3-figure supplement 1A: Energy expenditure/lean mass (kcal/g)	Day - Week 1	0.375286	0.332901	0.332496	0.343241	0.374936	0.405385	0.424269	0.36798	0.38889	0.341304	0.38197	0.353349	0.36242	0.353148	0.365887	0.357251	0.346696	0.330859	0.392398		0.282053	0.302644	0.335221	0.31082	0.280199	0.297744	0.302059	0.282552	0.285987		0.320609	0.329456	0.330262	0.319812	0.314108	0.293368	0.328427	0.291286
Figure 3-figure supplement 1A: Energy expenditure/lean mass (kcal/g)	Day - Week 3	0.390603	0.384364	0.353641	0.32896	0.351269	0.374539	0.39813	0.381109	0.384465	0.348626	0.361489	0.352412	0.356869	0.352506	0.3799	0.365207	0.355916	0.370883	0.409233		0.310646	0.31907	0.338252	0.304691	0.309765	0.275232	0.294646	0.327533	0.309178		0.318849	0.326205	0.335644	0.342462	0.32289	0.308419	0.324244	0.339068
Figure 3-figure supplement 1A: Energy expenditure/lean mass (kcal/g)	NIght - Week 1	0.419622	0.368171	0.450463	0.409113	0.436252	0.450399	0.484454	0.438061	0.468314	0.439533	0.315033	0.285443	0.286427	0.316084	0.337776	0.310761	0.329587	0.310474	0.369079		0.38063	0.385953	0.408649	0.363586	0.336515	0.383557	0.362896	0.365504	0.356854		0.313991	0.296623	0.315318	0.303105	0.29893	0.2562	0.309617	0.280018
Figure 3-figure supplement 1A: Energy expenditure/lean mass (kcal/g)	Night - Week 3	0.468476	0.447245	0.51619	0.414637	0.437645	0.45432	0.46974	0.434415	0.440611	0.479666	0.301896	0.217784	0.208969	0.221647	0.230059	0.297724	0.281309	0.334866	0.340096		0.379833	0.370229	0.406507	0.373999	0.349498	0.369607	0.359603	0.382706	0.35583		0.288153	0.247886	0.262116	0.254741	0.251577	0.207386	0.264022	0.264588
Figure 3-figure supplement 1A: Energy expenditure/lean mass (kcal/g)	Total - Week 1	0.794908	0.701072	0.782958	0.752354	0.811188	0.855785	0.908723	0.806042	0.857204	0.780837	0.697003	0.638792	0.648846	0.669232	0.703663	0.668011	0.676283	0.641332	0.761477		0.662682	0.688597	0.743869	0.674406	0.616714	0.681302	0.664955	0.648055	0.642841		0.6346	0.626079	0.64558	0.622917	0.613038	0.549568	0.638044	0.571304
Figure 3-figure supplement 1A: Energy expenditure/lean mass (kcal/g)	Total - Week 3	0.893278	0.867903	0.905638	0.770354	0.821001	0.85694	0.90458	0.849282	0.85763	0.861332	0.679212	0.586144	0.577427	0.588163	0.642589	0.691142	0.659402	0.72363	0.779824		0.716447	0.719609	0.775342	0.706743	0.685627	0.669779	0.68119	0.740534	0.692658		0.62525	0.598324	0.620446	0.617246	0.597397	0.538642	0.611127	0.624119
Figure 3-figure supplement 1C: Distance moved (metres)	Day - Week 1	46.079	47.495	39.2254	33.707	57.3646	52.2338	54.557	41.7075	48.2368	42.1209	84.7212	45.4226	107.049	153.923	124.042	101.319	147.803	55.4594	119.256		36.9596	55.7815	53.5097	32.6064	23.2374	21.1995	26.2373	26.9201	29.3314		46.4965	58.349	82.3973	77.7304	90.1652	75.6247	54.1154	81.1828
Figure 3-figure supplement 1C: Distance moved (metres)	Day - Week 3	34.1297	52.6679	38.5736	42.3469	43.4733	39.6113	31.8036	38.6288	60.3493	48.0632	101.116	94.4258	80.0687	87.8941	91.5929	106.959	97.7157	85.613	135.343		36.7357	32.5506	43.0042	27.193	29.721	22.9898	26.9344	41.0526	30.8784		77.3812	106.486	99.5972	72.3499	148.855	65.3269	67.0288	89.9823
Figure 3-figure supplement 1C: Distance moved (metres)	NIght - Week 1	95.1201	93.1391	155.368	101.374	149.83	170.584	100.422	128.077	168.819	153.778	173.581	67.354	163.179	198.152	241.239	134.069	300.174	142.434	192.349		107.766	166.118	117.996	74.1608	53.4568	88.2113	65.0745	62.8524	83.4133		131.468	95.3051	136.1	123.541	121.128	93.519	131.223	140.215
Figure 3-figure supplement 1C: Distance moved (metres)	Night - Week 3	149.901	124.265	148.393	96.7473	142.373	145.134	104.003	169.061	132.25	188.882	154.585	60.0615	57.2151	76.298	89.2402	111.146	126.214	134.492	134.567		76.1711	91.2292	120.362	65.6352	68.4212	116.227	79.7552	118.191	72.0257		105.448	76.7172	94.773	73.3203	118.824	59.2345	69.3649	65.3081
Figure 3-figure supplement 1C: Distance moved (metres)	Total - Week 1	141.199	140.634	194.594	135.081	207.195	222.818	154.979	169.784	217.055	195.899	258.302	112.777	270.228	352.075	365.281	235.388	447.977	197.894	311.604		144.726	221.899	171.505	106.767	76.6942	109.411	91.3118	89.7725	112.745		177.965	153.654	218.497	201.271	211.293	169.144	185.338	221.398
Figure 3-figure supplement 1C: Distance moved (metres)	Total - Week 3	184.031	176.933	186.966	139.094	185.846	184.746	135.807	207.689	192.599	236.945	255.702	154.487	137.284	164.192	180.833	218.105	223.929	220.105	269.91		112.907	123.78	163.366	92.8282	98.1422	139.217	106.69	159.243	102.904		182.83	183.203	194.37	145.67	267.678	124.561	136.394	155.29
Figure 3-figure supplement 1B: Linear regression of Total energy expenditure (kJ) vs lean mass (g) for each group - WEEK 3
Lean mass (g)	Energy expenditure - Male AL	Energy expenditure - Male CR	Energy expenditure - Female AL	Energy expenditure - Female CR
13.923			12.4371
14.005			12.155
14.06			12.7333
14.978			11.5384
15.0535			12.3589
13.602			11.6561
12.353			11.1743
12.459			10.5812
13.346			11.4459
15.052			12.9648
10.1				6.86004
11.279				6.61111
10.6945				6.1753
10.599				6.23394
10.462				6.72277
10.976				7.58598
11.1385				7.34475
10.326				7.4722
10.6905				8.3367
17.0875	12.2423
18.1145	13.0354
16.289	12.6296
17.995	12.7178
19.38	13.2875
17.777	11.9067
19.116	13.0216
19.8295	14.6844
18.8915	13.0853
13.8005		8.62877
13.2445		7.9245
12.5285		7.77326
12.027		7.42362
13.2945		7.9421
14.213		7.65572
12.2675		7.497
13.3645		8.34104
