# Supplementary material for: The effects of caloric restriction on adipose tissue and metabolic health are sex- and age-dependent
Source: eLife journal article supplement (doi:10.7554/elife.88080), 2023-04-18
Supplement: supp [file Figure 3-figure supplement 2_Source_Data.xlsx]

## Sheet: Fig 3-fig supp2A-B
Figure 3-figure supplement 2A-B: Data from Indirect Calorimetry at weeks 1 and 3
Readout	Time period	Female AL	Female AL	Female AL	Female AL	Female AL	Female AL	Female AL	Female AL	Female AL	Female AL	Female CR	Female CR	Female CR	Female CR	Female CR	Female CR	Female CR	Female CR	Female CR	Female CR	Male AL	Male AL	Male AL	Male AL	Male AL	Male AL	Male AL	Male AL	Male AL	Male AL	Male CR	Male CR	Male CR	Male CR	Male CR	Male CR	Male CR	Male CR	Male CR
Figure 3-figure supplement 2A: RER	Day - Week 1	0.871521	0.909013	0.849377	0.920636	0.912497	0.930074	0.826412	0.889739	0.872466	0.893815	0.992725	1.00202	0.996992	0.965507	0.939086	0.950031	0.962916	0.963992	0.965447		0.872744	0.865613	0.843936	0.817894	0.896303	0.94616	0.901925	0.847929	0.850497		0.980568	0.978271	0.951193	0.921307	0.940825	0.930265	0.917483	0.931883
Figure 3-figure supplement 2A: RER	Day - Week 3	0.861645	0.936143	0.888256	0.824682	0.857352	0.91682	0.791346	0.824509	0.827946	0.802637	1.02206	1.01714	1.00183	1.00488	0.993338	1.01196	1.01124	0.992961	0.984543		0.902621	0.946204	0.894131	0.903971	0.827286	0.936354	0.901565	0.820948	0.853489		1.01317	1.00896	0.986689	0.988956	0.987031	0.979936	0.987167	0.977054
Figure 3-figure supplement 2A: RER	NIght - Week 1	0.950636	1.088	1.05389	1.08487	1.06025	0.980144	1.05206	1.02386	1.02578	0.8997	0.758596	0.793499	0.803035	0.786422	0.870652	0.807509	0.792602	0.784046	0.772387		1.07226	1.05349	1.03989	1.02993	1.02271	1.04137	0.999257	1.04134	1.02264		0.780545	0.800237	0.805142	0.828913	0.807027	0.800323	0.791704	0.763563
Figure 3-figure supplement 2A: RER	Night - Week 3	1.00422	0.978047	1.03916	1.04079	0.993748	1.08676	1.02546	1.04749	1.03017	0.96243	0.806089	0.823866	0.774686	0.845319	0.806751	0.83007	0.80539	0.821543	0.78935		1.06157	1.03871	1.07151	1.03101	1.02932	1.01771	1.00161	1.02905	1.0094		0.807718	0.814073	0.795034	0.831892	0.822904	0.842807	0.825241	0.799994
Figure 3-figure supplement 2B: RER	Fasted (04.00-09.00) - Week 1	na	na	na	na	na	na	na	na	na	na	0.741788	0.743614	0.739494	0.736075	0.734849	0.723325	0.720687	0.722537	0.728635		na	na	na	na	na	na	na	na	na	na	0.73301	0.751948	0.721266	0.735114	0.731167	0.721397	0.721215	0.724201
Figure 3-figure supplement 2B: RER	Fasted (04.00-09.00) - Week 3	na	na	na	na	na	na	na	na	na	na	0.760823	0.759147	0.735012	0.759601	0.74123	0.761567	0.743672	0.757646	0.740144		na	na	na	na	na	na	na	na	na	na	0.751955	0.766954	0.743338	0.772301	0.756523	0.762805	0.754975	0.770813

## Sheet: Fig 3-fig supp 2C
Figure 3-figure supplement 2C: Fatty acid oxidation (kcal/h) from indirect calorimetry - WEEK 1
Time of day	Female AL	Female AL	Female AL	Female AL	Female AL	Female AL	Female AL	Female AL	Female AL	Female AL	Female CR	Female CR	Female CR	Female CR	Female CR	Female CR	Female CR	Female CR	Female CR	Female CR	Male AL	Male AL	Male AL	Male AL	Male AL	Male AL	Male AL	Male AL	Male AL	Male AL	Male CR	Male CR	Male CR	Male CR	Male CR	Male CR	Male CR	Male CR	Male CR	Male CR
07:00:00	0.176307	0.0271591	0.152885	0	0.0865796	0.0710152	0.0230167	0	0.192161	0	0.206663	0.140563	0.272487	0.261515	0.207338	0.20369	0.222673	0.250579	0.221156		0.0568078	0.130817	0.175924	0.104131	0.00573254	0	0.119961	0.0148223	0.0643562		0.251089	0.209879	0.342652	0.271531	0.268999	0.232698	0.348046	0.250857
08:00:00	0.203129	0.0945957	0.212176	0	0.127314	0.138191	0.101434	0.0896253	0.241521	0.0775036	0.253534	0.153502	0.190659	0.233411	0.257063	0.268429	0.235761	0.199645	0.246988		0.145164	0.217811	0.222267	0.2042	0.10001	0	0.211383	0.0955537	0.148945		0.263942	0.247786	0.30522	0.324046	0.281244	0.258948	0.216535	0.295108
09:00:00	0.223832	0.159035	0.239114	0.0838997	0.143304	0.0872037	0.142907	0.143007	0.18829	0.160521	0.180542	0.189155	0.285069	0.20958	0.174486	0.21688	0.291817	0.251596	0.264858		0.182945	0.257842	0.250672	0.237551	0.0443825	0.0617398	0.256943	0.183311	0.177438		0.271427	0.223601	0.350261	0.265155	0.275315	0.265228	0.312561	0.25308
10:00:00	0.165278	0.197254	0.276869	0.179058	0.172138	0.100834	0.184927	0.200734	0.19567	0.181988	0.174801	0.194917	0.200034	0.233605	0.137998	0.202282	0.263537	0.287289	0.264999		0.227308	0.288025	0.25131	0.297651	0.14273	0.162127	0.323011	0.199677	0.285857		0.212786	0.19457	0.321241	0.284658	0.288755	0.255625	0.269268	0.368826
11:00:00	0.227854	0.169475	0.267126	0.197924	0.237059	0.104582	0.267103	0.263434	0.258721	0.202339	0	0	0	0.0628453	0.131209	0.0818372	0	0	0		0.250827	0.3176	0.253792	0.338026	0.127633	0.226547	0.343856	0.222537	0.344638		0	0	0.0797461	0.288664	0.203603	0.117617	0.151843	0.0487298
12:00:00	0.245889	0.175668	0.264888	0.223352	0.15688	0.132371	0.274648	0.268612	0.199144	0.262761	0	0	0	0	0	0	0	0	0		0.283556	0.285833	0.243897	0.346893	0.0609481	0.231773	0.313859	0.235334	0.253373		0	0	0	0	0	0	0	0
13:00:00	0.107374	0.096474	0.258396	0.0358765	0.205187	0.123649	0.295915	0.175145	0.11197	0.267453	0	0	0	0	0	0	0	0	0		0.297687	0.274574	0.231149	0.323919	0.1278	0.0782225	0.206069	0.203213	0.268892		0	0	0	0	0	0	0	0
14:00:00	0.135221	0.165408	0.200134	0.14891	0.0748212	0.0629884	0.285123	0.223067	0.204908	0.147589	0	0	0	0	0	0	0	0	0		0.305998	0.159444	0.260476	0.316869	0.171108	0.187669	0.236925	0.267008	0.261824		0	0	0	0	0	0	0	0
15:00:00	0.17895	0.162933	0.204341	0.173424	0.145554	0.0544669	0.28155	0.239985	0.212793	0.241724	0	0	0	0	0	0	0	0	0		0.246092	0.141284	0.1684	0.303252	0.247582	0.138031	0	0.285372	0.281104		0	0	0	0	0	0	0	0
16:00:00	0.127304	0.0594041	0.0791577	0.107573	0.0513109	0.0410332	0.290076	0.106326	0.201833	0.193522	0	0	0	0	0	0	0	0	0		0.083611	0.111255	0.187886	0.284892	0.288489	0	0	0.294013	0.26882		0	0	0	0	0	0	0	0
17:00:00	0.0633171	0.058285	0.029505	0.13089	0	0.0333541	0.211311	0.113626	0.210963	0	0	0	0	0	0	0	0	0	0		0.13603	0.116101	0.109543	0.216558	0.259567	0	0	0.287214	0.291123		0	0	0	0	0	0	0	0
18:00:00	0	0	0	0.0699524	0	0	0.0792459	0	0	0.0301362	0	0	0	0	0	0	0	0	0		0.0662949	0	0.0597279	0.184784	0.21331	0.034293	0	0.294754	0.244923		0	0	0	0	0	0	0	0
19:00:00	0	0	0	0	0	0.0228605	0	0	0.0573588	0	0	0	0	0	0	0	0	0	0		0	0	0	0	0	0.0131421	0	0	0.134458		0	0	0	0	0	0	0	0
20:00:00	0	0	0	0	0	0	0	0	0	0.00269989	0.335754	0.0581686	0.00206877	0.115437	0	0	0.0570664	0.108188	0.0818894		0	0	0	0	0	0	0	0	0		0.122098	0.125555	0	0	0	0.0334897	0.0363546	0.201182
21:00:00	0	0	0	0	0	0	0	0	0	0.058546	0.412851	0.232431	0.151933	0.201209	0	0.0788244	0.166884	0.237493	0.233635		0	0	0	0	0	0	0	0	0		0.234059	0.200343	0.181993	0.0424678	0.153992	0.109237	0.173505	0.308448
22:00:00	0	0	0	0	0	0	0	0	0	0.141021	0.278745	0.219865	0.268748	0.295523	0.0646748	0.163477	0.238474	0.305319	0.279204		0	0	0	0	0	0	0	0	0		0.304478	0.213623	0.310648	0.17718	0.256762	0.191176	0.244377	0.352029
23:00:00	0	0	0	0	0	0	0	0	0	0.266318	0.417018	0.270469	0.253065	0.327027	0.151131	0.176867	0.242438	0.24278	0.255101		0	0	0	0	0	0	0	0	0		0.288381	0.272351	0.305491	0.209448	0.300951	0.25623	0.334457	0.327134
1900-01-01	0.0991893	0	0	0	0	0	0	0	0	0.245056	0.179798	0.283773	0.286861	0.282513	0.122638	0.294977	0.190571	0.28763	0.274369		0	0	0	0	0	0	0	0	0		0.342084	0.305417	0.384468	0.326038	0.328171	0.268318	0.30661	0.300701
1900-01-01 01:00:00	0.0598461	0	0	0	0	0.0088146	0	0	0	0.184669	0.386284	0.12074	0.277995	0.273045	0.158422	0.14955	0.286646	0.221158	0.304018		0	0	0	0	0	0	0	0	0		0.306746	0.243333	0.340303	0.288319	0.294955	0.288781	0.29979	0.327174
1900-01-01 02:00:00	0.124159	0	0	0	0	0.0700848	0	0	0.0152266	0.246902	0.139084	0.236719	0.146588	0.141122	0.172001	0.204085	0.22198	0.231043	0.259653		0	0	0	0	0.0190988	0	0.0228648	0	0		0.278447	0.29706	0.381653	0.351265	0.262515	0.272016	0.278872	0.319423
1900-01-01 03:00:00	0.236204	0	0.034301	0	0	0.0824675	0	0.0858185	0	0.0703414	0.244939	0.267041	0.298198	0.342924	0.125539	0.114452	0.264591	0.261331	0.275877		0	0	0	0	0	0	0.0558845	0	0		0.311511	0.255743	0.393797	0.323594	0.343548	0.250155	0.310372	0.241245
1900-01-01 04:00:00	0.1824	0	0	0	0	0.0667209	0	0.116837	0	0.186054	0.320944	0.239009	0.25389	0.0755883	0.124356	0.199368	0.126884	0.19082	0.191573		0	0	0	0	0	0	0.117234	0.00981778	0		0.285532	0.26131	0.291313	0.3223	0.231894	0.24378	0.250528	0.311658
1900-01-01 05:00:00	0.212027	0	0.0427995	0	0.028225	0.0157016	0	0.123378	0	0.189753	0.116842	0.180068	0.244559	0.0499629	0.151817	0.19554	0.281211	0.143767	0.291912		0	0	0.0210167	0	0.0444948	0	0.144181	0	0.00163611		0.262861	0.208247	0.348721	0.267126	0.334909	0.243146	0.31423	0.236454
1900-01-01 06:00:00	0.224852	0.0165226	0.014221	0	0.103897	0.101017	0	0.192882	0.0435527	0.226397	0.309491	0.161959	0.256738	0.0736996	0.125178	0.129603	0.212958	0.319927	0.14641		0	0	0.107923	0.079265	0.0109197	0.131789	0.231273	0.103023	0.0362331		0.254572	0.256027	0.269842	0.335525	0.212297	0.293053	0.168613	0.25998
1900-01-01 07:00:00	0.221902	0.118415	0.148342	0	0.222284	0.0367988	0.0267354	0.171686	0.149776	0.120367	0.175809	0.06929	0.226504	0.301318	0.152957	0.163391	0.231016	0.186959	0.228158		0.0496064	0.136193	0.164262	0.223761	0.0167205	0.155634	0.102828	0.0970398	0.00097847		0.251824	0.215243	0.320882	0.262667	0.267059	0.20968	0.330224	0.285703
Figure 3-figure supplement 2C: Fatty acid oxidation (kcal/h) from indirect calorimetry - WEEK 3
Time of day	Female AL	Female AL	Female AL	Female AL	Female AL	Female AL	Female AL	Female AL	Female AL	Female AL	Female CR	Female CR	Female CR	Female CR	Female CR	Female CR	Female CR	Female CR	Female CR	Female CR	Male AL	Male AL	Male AL	Male AL	Male AL	Male AL	Male AL	Male AL	Male AL	Male AL	Male CR	Male CR	Male CR	Male CR	Male CR	Male CR	Male CR	Male CR	Male CR	Male CR
07:00:00	0.312694	0	0.058337	0.199317	0.0504312	0	0.14843	0.0480404	0.171932	0.20528	0.18167	0.176819	0.252345	0.197149	0.172326	0.120426	0.133593	0.278252	0.225585		0.142723	0	0.0752735	0.00044434	0.150045	0	0.124846	0.117814	0.19798		0.188019	0.199722	0.275933	0.241512	0.289978	0.239988	0.209031	0.240302
08:00:00	0.222858	0.0637688	0.244345	0.201691	0.230303	0.0103619	0.227515	0.0858378	0.246669	0.27132	0.21855	0.136031	0.209006	0.189968	0.255379	0.168061	0.241861	0.202815	0.1902		0.243804	0	0.107576	0.0814975	0.164651	0	0.220468	0.218783	0.182314		0.223084	0.241197	0.215919	0.213618	0.217293	0.261733	0.31894	0.271926
09:00:00	0.250397	0.0221106	0.281164	0.275408	0.186035	0.0994454	0.251012	0.142048	0.282002	0.316797	0.236659	0.229839	0.287009	0.209553	0.228703	0.239258	0.239102	0.246157	0.274942		0.213769	0	0.122433	0.0865578	0.263494	0	0.253881	0.24825	0.194536		0.229733	0.296373	0.218751	0.244283	0.263669	0.268983	0.332322	0.248901
10:00:00	0.235886	0.0757921	0.309172	0.29556	0.230748	0.165199	0.32263	0.217683	0.261724	0.294891	0.193318	0.205244	0.245771	0.157264	0.115938	0.196438	0.275054	0.242188	0.29132		0.196275	0.0649777	0.181551	0.229377	0.317765	0.12545	0.329752	0.320687	0.243344		0.197599	0.252469	0.233523	0.24628	0.228753	0.257938	0.257583	0.354786
11:00:00	0.264067	0.118093	0.171204	0.321257	0.27274	0.205362	0.359092	0.244544	0.344198	0.346224	0	0	0	0.0542479	0.0864299	0	0	0	0		0.190209	0.117016	0.251515	0.196622	0.286351	0.148421	0.308608	0.293843	0.310777		0	0	0.0818237	0.0751432	0.0917423	0	0	0
12:00:00	0.283358	0.18527	0.27628	0.339767	0.316162	0.225679	0.348015	0.243664	0.342491	0.338988	0	0	0	0	0	0	0	0	0		0.131222	0.181679	0.27895	0.218195	0.318017	0.146815	0.18663	0.304054	0.322846		0	0	0	0	0	0	0	0
13:00:00	0.221687	0.172169	0.209824	0.229203	0.319535	0.213221	0.335471	0.298578	0.344521	0.34147	0	0	0	0	0	0	0	0	0		0.193915	0.14738	0.283559	0.139244	0.339342	0.112469	0.167514	0.311024	0.213449		0	0	0	0	0	0	0	0
14:00:00	0.227577	0.193417	0.117564	0.20501	0.243604	0.237695	0.340569	0.307735	0.270203	0.344118	0	0	0	0	0	0	0	0	0		0.197161	0.184207	0.270666	0.14028	0.302363	0.150281	0.140475	0.342254	0.175527		0	0	0	0	0	0	0	0
15:00:00	0.10643	0.0710024	0.236356	0.229636	0.279522	0.195871	0.24716	0.319172	0.304912	0.288062	0	0	0	0	0	0	0	0	0		0.173555	0.162997	0.213281	0.132411	0.321904	0.155711	0.118683	0.264584	0.181542		0	0	0	0	0	0	0	0
16:00:00	0.112963	0.048399	0.0266012	0.26879	0.221449	0.192065	0.280885	0.291381	0.242488	0.283507	0	0	0	0	0	0	0	0	0		0.168395	0.111717	0.149451	0.228666	0.246867	0.159955	0	0.255018	0.243801		0	0	0	0	0	0	0	0
17:00:00	0.0576736	0.108823	0	0.200903	0.21472	0	0.316945	0.325111	0.140821	0.132307	0	0	0	0	0	0	0	0	0		0.0826819	0.116021	0	0.23566	0.197201	0.180565	0.0594152	0.105111	0.257408		0	0	0	0	0	0	0	0
18:00:00	0	0	0	0.293938	0	0	0.253113	0.342848	0.0251901	0.115822	0	0	0	0	0	0	0	0	0		0.159341	0.0491723	0	0.128411	0.21026	0.156824	0.026192	0.0903485	0.20177		0	0	0	0	0	0	0	0
19:00:00	0	0	0	0.0794899	0	0	0.00907766	0.0446744	0.0508649	0.0499248	0	0	0	0	0	0	0	0	0		0	0.0689809	0	0.0994287	0	0.148488	0	0.0284041	0.253597		0	0	0	0	0	0	0	0
20:00:00	0	0	0	0	0	0	0	0	0.0154467	0	0.0375911	0	0.10174	0	0.010069	0.00607577	0.0019026	0.0186767	0.037		0	0	0	0	0	0	0	0	0.0712075		0.0152517	0.0301128	0.0250245	0.0300857	0	0.0194944	0	0.0557071
21:00:00	0	0	0	0	0	0	0	0	0	0	0.119452	0.0780658	0.18412	0.0346829	0.105361	0.0437066	0.0557945	0.103759	0.147082		0	0	0	0	0	0	0	0	0		0.15154	0.138883	0.182556	0.0842147	0.110927	0.0693189	0.109554	0.196889
22:00:00	0	0.0857569	0	0	0	0	0	0	0	0	0.216919	0.221568	0.266416	0.118015	0.173502	0.0825262	0.154163	0.153574	0.248638		0	0	0	0	0	0	0	0	0		0.201228	0.207979	0.281079	0.169893	0.168927	0.150879	0.145025	0.205785
23:00:00	0	0.0470719	0	0	0	0	0	0	0	0.0127344	0.203953	0.237339	0.282357	0.152231	0.22262	0.2128	0.186613	0.1064	0.162947		0	0	0	0	0	0	0	0	0		0.232703	0.265467	0.259295	0.163013	0.201663	0.164161	0.255495	0.311424
1900-01-01	0	0.113145	0	0	0	0	0	0	0	0.0195889	0.259133	0.180536	0.222855	0.0999798	0.15278	0.0883928	0.103905	0.0441511	0.230276		0	0	0	0	0	0	0	0	0		0.251691	0.209444	0.291945	0.207923	0.166975	0.201168	0.168942	0.154027
1900-01-01 01:00:00	0	0	0	0	0	0	0	0	0	0.0354949	0.132732	0.263501	0.327396	0.28205	0.244907	0.0535161	0.0533411	0.057527	0.320317		0	0	0	0	0	0	0	0	0		0.209902	0.260611	0.258575	0.203234	0.20107	0.203709	0.271477	0.242164
1900-01-01 02:00:00	0	0	0	0	0	0	0	0	0	0.131676	0.267014	0.202635	0.181078	0.125722	0.233537	0.103543	0.125849	0.303988	0.151639		0	0	0	0	0	0	0.0008543	0	0		0.21895	0.199127	0.366775	0.151989	0.204008	0.194674	0.139642	0.231583
1900-01-01 03:00:00	0.0852899	0.0679376	0	0	0.00673565	0	0	0	0	0.14952	0.190144	0.207611	0.289971	0.224487	0.0916895	0.148389	0.245329	0.130192	0.194507		0	0	0	0	0	0.0163566	0.053019	0	0		0.178618	0.229574	0.198338	0.215679	0.0990406	0.202394	0.209812	0.111918
1900-01-01 04:00:00	0.211175	0.139546	0.0124659	0	0.133198	0	0	0	0	0.177151	0.0521438	0.245531	0.23382	0.117199	0.0430981	0.209378	0.110693	0.0650022	0.162322		0	0	0	0.0213301	0.00961729	0.064843	0.0506086	0	0.0235503		0.231942	0.181096	0.329783	0.184798	0.224827	0.110783	0.245896	0.175382
1900-01-01 05:00:00	0.0785398	0.191093	0.0685235	0.0133828	0.220248	0	0	0	0	0.0494909	0.27222	0.177618	0.310325	0.147081	0.0452466	0.0920899	0.0467588	0.0689614	0.246033		0	0	0.0894247	0.0245564	0.109771	0	0.149543	0	0		0.216821	0.210794	0.178044	0.150686	0.222815	0.0522157	0.190889	0.0550133
1900-01-01 06:00:00	0.148854	0.108514	0.0403321	0	0.196575	0	0.0485042	0	0.0522272	0.174849	0.121132	0.14986	0.140836	0.171726	0.0401392	0.0409577	0.229603	0.148966	0.183459		0	0.0106326	0.0645913	0	0.0878318	0.0210877	0.109354	0.0326948	0.0583395		0.111465	0.201146	0.26349	0.19935	0.207219	0.0511807	0.188944	0.0924938
1900-01-01 07:00:00	0.138123	0.0119379	0.162611	0.10916	0.16561	0	0.0777826	0.0895339	0.154884	0.26722	0.180855	0.153043	0.273759	0.134641	0.15281	0.0893976	0.131133	0.266802	0.264737		0.0449475	0.0596504	0.214941	0.0249049	0.275958	0.124241	0.289758	0.108822	0.0704429		0.232257	0.208496	0.210461	0.237961	0.226132	0.179771	0.237212	0.242275
