# Supplementary material for: The effects of caloric restriction on adipose tissue and metabolic health are sex- and age-dependent
Source: eLife journal article supplement (doi:10.7554/elife.88080), 2023-04-18
Supplement: supp [file Figure 3_Source_Data.xlsx]

## Sheet: Figures 3A, 3D
Figure 3A: Energy Expenditure (kcal/h) from indirect calorimetry - WEEK 1
Time of day	Female AL	Female AL	Female AL	Female AL	Female AL	Female AL	Female AL	Female AL	Female AL	Female AL	Female CR	Female CR	Female CR	Female CR	Female CR	Female CR	Female CR	Female CR	Female CR	Female CR	Male AL	Male AL	Male AL	Male AL	Male AL	Male AL	Male AL	Male AL	Male AL	Male AL	Male CR	Male CR	Male CR	Male CR	Male CR	Male CR	Male CR	Male CR	Male CR	Male CR
07:00:00	0.319547	0.400977	0.399514	0.364285	0.378955	0.312965	0.362653	0.39033	0.413054	0.405738	0.236598	0.159988	0.321707	0.298535	0.221586	0.223031	0.228828	0.267248	0.249405		0.477052	0.450422	0.348271	0.49852	0.46875	0.556024	0.460162	0.434862	0.487114		0.281975	0.241462	0.352161	0.306983	0.295254	0.243833	0.38822	0.26596
08:00:00	0.323225	0.353561	0.348453	0.368214	0.358063	0.359232	0.366164	0.417488	0.412746	0.382918	0.309138	0.189244	0.214441	0.268612	0.294729	0.304512	0.260924	0.220657	0.296006		0.435524	0.419955	0.383701	0.432909	0.416503	0.523155	0.468663	0.433016	0.545411		0.299657	0.323233	0.320228	0.392207	0.328322	0.289369	0.221586	0.344931
09:00:00	0.308865	0.322712	0.352803	0.408199	0.336404	0.304922	0.387533	0.396914	0.454957	0.380122	0.214443	0.227242	0.342277	0.250373	0.203164	0.234568	0.337145	0.283409	0.306311		0.434316	0.38727	0.394456	0.457616	0.451078	0.477583	0.447399	0.435699	0.476828		0.315306	0.262188	0.38919	0.290741	0.317222	0.284283	0.342907	0.273368
10:00:00	0.423241	0.3442	0.385555	0.387604	0.36984	0.312464	0.342994	0.40257	0.467471	0.427529	0.378168	0.371373	0.376132	0.296441	0.163895	0.215854	0.302094	0.338908	0.291576		0.458142	0.404715	0.344347	0.404088	0.424584	0.489923	0.424962	0.483448	0.499185		0.399598	0.415463	0.32123	0.338096	0.329359	0.275665	0.279761	0.444101
11:00:00	0.345138	0.381643	0.330603	0.337746	0.395734	0.382638	0.365149	0.407912	0.452687	0.443453	0.417578	0.369256	0.37796	0.494346	0.467236	0.380076	0.467436	0.459907	0.453641		0.426908	0.465187	0.446052	0.497608	0.48642	0.478714	0.411538	0.450846	0.477026		0.415408	0.400595	0.612998	0.440663	0.490273	0.426251	0.481525	0.555554
12:00:00	0.324832	0.345782	0.33889	0.386743	0.384117	0.297549	0.33968	0.342661	0.467823	0.360173	0.39407	0.384254	0.385432	0.46732	0.491581	0.354661	0.398788	0.388194	0.388994		0.502396	0.399266	0.361313	0.421179	0.501474	0.534664	0.489892	0.406258	0.523229		0.403228	0.395828	0.431871	0.606257	0.488867	0.37999	0.418737	0.468723
13:00:00	0.445007	0.364327	0.357281	0.437457	0.371589	0.321684	0.336769	0.439916	0.403951	0.442738	0.407067	0.373226	0.335466	0.332768	0.456347	0.344951	0.353971	0.37906	0.352875		0.44728	0.442011	0.375899	0.384341	0.40977	0.444692	0.419931	0.456921	0.436067		0.41565	0.342909	0.447229	0.449319	0.458787	0.38852	0.364887	0.413011
14:00:00	0.358421	0.348202	0.338208	0.33464	0.415557	0.33558	0.321889	0.357797	0.379424	0.392444	0.386007	0.391767	0.35527	0.325663	0.343095	0.389769	0.359295	0.401305	0.410277		0.38791	0.38579	0.391253	0.423008	0.446374	0.479793	0.504314	0.409329	0.510506		0.388353	0.430208	0.501501	0.446055	0.439807	0.366405	0.365273	0.44121
15:00:00	0.34296	0.412392	0.373308	0.399611	0.381144	0.324676	0.326331	0.396257	0.425162	0.408399	0.496413	0.338163	0.358396	0.386528	0.506344	0.309449	0.290929	0.355173	0.339753		0.444031	0.493226	0.40287	0.418945	0.401513	0.471263	0.509602	0.387665	0.435197		0.41149	0.370181	0.462599	0.551266	0.399171	0.395062	0.311452	0.370746
16:00:00	0.424822	0.379767	0.389731	0.385406	0.412694	0.35642	0.345565	0.374803	0.393111	0.426395	0.311947	0.34695	0.416798	0.381669	0.38898	0.411082	0.381019	0.394259	0.380106		0.556347	0.494243	0.403112	0.392786	0.397304	0.50154	0.526715	0.400824	0.477982		0.392261	0.329229	0.441313	0.530242	0.365473	0.330323	0.42381	0.41974
17:00:00	0.390312	0.389173	0.391104	0.473134	0.424212	0.36154	0.411882	0.427029	0.453696	0.450083	0.477883	0.326012	0.317321	0.435791	0.364429	0.291817	0.302973	0.359103	0.352693		0.46552	0.432532	0.422617	0.474731	0.447603	0.480931	0.514423	0.401885	0.500203		0.36309	0.41278	0.463559	0.494258	0.475825	0.344767	0.351355	0.495615
18:00:00	0.410275	0.439998	0.414677	0.437022	0.478341	0.352937	0.451909	0.436075	0.469153	0.481045	0.374252	0.346919	0.363319	0.332193	0.414946	0.371005	0.373565	0.333035	0.391418		0.564609	0.577495	0.478273	0.531244	0.464554	0.533816	0.514222	0.460497	0.486366		0.396194	0.35797	0.494074	0.532779	0.454431	0.375522	0.43104	0.430336
19:00:00	0.477216	0.499735	0.485963	0.555991	0.481606	0.395582	0.531577	0.542249	0.582377	0.531413	0.512936	0.43971	0.419499	0.451081	0.466733	0.39085	0.420336	0.444016	0.40558		0.624952	0.627138	0.574386	0.567637	0.573498	0.642116	0.617314	0.611208	0.596809		0.450552	0.409781	0.513149	0.479612	0.529639	0.42671	0.410372	0.484067
20:00:00	0.495193	0.498531	0.500589	0.555163	0.501617	0.388263	0.539899	0.505264	0.531125	0.508868	0.532907	0.421346	0.413942	0.448254	0.382196	0.413826	0.384623	0.437787	0.420714		0.650665	0.594768	0.608913	0.579365	0.574073	0.6246	0.586809	0.60309	0.586075		0.385781	0.453651	0.50372	0.486651	0.529904	0.404885	0.42963	0.497144
21:00:00	0.423926	0.501703	0.481492	0.555729	0.478192	0.368887	0.495373	0.534588	0.563421	0.486001	0.489955	0.408993	0.39886	0.446577	0.373536	0.275544	0.395673	0.451482	0.393809		0.649342	0.537212	0.602796	0.584334	0.540554	0.589523	0.656624	0.629796	0.605633		0.397104	0.380901	0.483086	0.485282	0.500093	0.321692	0.438598	0.40338
22:00:00	0.441709	0.448836	0.476903	0.556833	0.418154	0.400094	0.551023	0.518369	0.548031	0.439097	0.304228	0.277287	0.405435	0.416258	0.387518	0.277257	0.361319	0.39496	0.327259		0.622505	0.591928	0.589007	0.659099	0.625069	0.610106	0.551611	0.557523	0.57289		0.400767	0.302394	0.484185	0.480701	0.407471	0.345214	0.352638	0.424041
23:00:00	0.424321	0.497394	0.454255	0.531579	0.526062	0.364893	0.552702	0.489548	0.436398	0.519274	0.466492	0.322951	0.291835	0.397802	0.392143	0.234176	0.305005	0.280747	0.279685		0.585447	0.614521	0.586304	0.605872	0.579954	0.614257	0.61447	0.546504	0.632874		0.329324	0.349738	0.384511	0.314813	0.393599	0.347894	0.437396	0.362173
1900-01-01	0.343985	0.426656	0.409467	0.477628	0.457861	0.386853	0.438697	0.411644	0.452604	0.43475	0.178202	0.339944	0.334585	0.31329	0.272392	0.348697	0.224652	0.349415	0.288047		0.593399	0.629808	0.559231	0.580327	0.538493	0.544775	0.526813	0.578678	0.644452		0.395911	0.395182	0.493412	0.47395	0.399962	0.310547	0.35391	0.318433
1900-01-01 01:00:00	0.46573	0.407014	0.454999	0.570043	0.479831	0.413769	0.484316	0.549054	0.535048	0.417451	0.438469	0.134681	0.305171	0.291131	0.326214	0.163673	0.339092	0.242772	0.311119		0.631364	0.510017	0.451008	0.579946	0.500731	0.569062	0.56508	0.54315	0.53524		0.336485	0.285706	0.374196	0.317932	0.330184	0.323177	0.322833	0.34866
1900-01-01 02:00:00	0.389947	0.450859	0.373077	0.462911	0.343352	0.305689	0.512848	0.423797	0.458493	0.47811	0.149136	0.269122	0.155962	0.151153	0.255656	0.228838	0.237131	0.261773	0.271407		0.581224	0.498306	0.56281	0.483788	0.531068	0.608357	0.569352	0.565798	0.612753		0.299057	0.360743	0.448835	0.410938	0.272895	0.288897	0.296997	0.340997
1900-01-01 03:00:00	0.31479	0.427	0.38536	0.452752	0.475039	0.343378	0.493585	0.432169	0.539331	0.431131	0.265298	0.306059	0.333841	0.384247	0.169519	0.132491	0.299717	0.298695	0.29023		0.55398	0.577161	0.44208	0.544762	0.494183	0.532452	0.527259	0.521936	0.579565		0.340786	0.296177	0.434287	0.35212	0.402234	0.276644	0.33662	0.251728
1900-01-01 04:00:00	0.470079	0.377675	0.460908	0.409736	0.347442	0.401881	0.386168	0.489587	0.41938	0.415578	0.362261	0.275052	0.281731	0.0886406	0.141434	0.226156	0.12787	0.201726	0.197945		0.604606	0.499773	0.555082	0.566238	0.540435	0.550331	0.570733	0.514114	0.551593		0.313113	0.317486	0.313765	0.368614	0.249218	0.263791	0.260215	0.335893
1900-01-01 05:00:00	0.368205	0.422264	0.377937	0.46794	0.434596	0.320055	0.459332	0.375609	0.49793	0.420366	0.135921	0.202363	0.287236	0.0646778	0.187133	0.200948	0.311005	0.152998	0.331628		0.554911	0.514913	0.408564	0.494908	0.451834	0.557119	0.519225	0.481962	0.567521		0.297914	0.246721	0.428558	0.288206	0.380024	0.254672	0.346624	0.251528
1900-01-01 06:00:00	0.428061	0.378798	0.461909	0.482222	0.318941	0.359457	0.459374	0.437092	0.478387	0.474311	0.350439	0.191255	0.288938	0.0687984	0.13236	0.135076	0.224747	0.342716	0.147376		0.591704	0.482796	0.472857	0.559819	0.530462	0.543243	0.530505	0.495017	0.548966		0.278698	0.317923	0.268116	0.383996	0.228442	0.32168	0.183046	0.281513
1900-01-01 07:00:00	0.353158	0.3804	0.387917	0.377666	0.379162	0.433505	0.385877	0.398315	0.429622	0.411861	0.193898	0.0845282	0.260213	0.343736	0.174818	0.175555	0.24488	0.194449	0.25731		0.483716	0.463635	0.419635	0.510375	0.498318	0.534671	0.529535	0.453625	0.520554		0.300749	0.24996	0.359796	0.287254	0.298114	0.217611	0.367224	0.3124
Figure 3A: Energy Expenditure (kcal/h) from indirect calorimetry - WEEK 3
Time of day	Female AL	Female AL	Female AL	Female AL	Female AL	Female AL	Female AL	Female AL	Female AL	Female AL	Female CR	Female CR	Female CR	Female CR	Female CR	Female CR	Female CR	Female CR	Female CR	Female CR	Male AL	Male AL	Male AL	Male AL	Male AL	Male AL	Male AL	Male AL	Male AL	Male AL	Male CR	Male CR	Male CR	Male CR	Male CR	Male CR	Male CR	Male CR	Male CR	Male CR
07:00:00	0.392416	0.426562	0.445187	0.419348	0.485432	0.536528	0.428807	0.415932	0.469893	0.417364	0.238214	0.218193	0.298122	0.244486	0.21466	0.139532	0.157553	0.350973	0.257629		0.564926	0.540314	0.463188	0.561867	0.531923	0.433558	0.490613	0.407157	0.529673		0.221939	0.26227	0.354153	0.339694	0.3814	0.286667	0.257928	0.29295
08:00:00	0.411416	0.353048	0.384926	0.477735	0.421792	0.449279	0.445368	0.42489	0.405816	0.42591	0.288443	0.177958	0.251048	0.237289	0.310071	0.243902	0.308731	0.254767	0.213049		0.51232	0.461747	0.414179	0.446774	0.450786	0.511839	0.494319	0.380697	0.49037		0.284662	0.330321	0.248185	0.270903	0.267133	0.314234	0.402511	0.328406
09:00:00	0.385489	0.417801	0.378152	0.423917	0.464076	0.447634	0.41106	0.411922	0.49463	0.384964	0.299097	0.29159	0.371832	0.286293	0.294534	0.280228	0.2901	0.294573	0.31547		0.535446	0.49783	0.396776	0.472007	0.464736	0.468238	0.425579	0.396271	0.451132		0.27868	0.394571	0.269517	0.315156	0.328348	0.314759	0.400672	0.288804
10:00:00	0.39059	0.365581	0.427893	0.464175	0.416159	0.406213	0.42206	0.429352	0.474377	0.447049	0.366024	0.337606	0.403914	0.19705	0.129982	0.339147	0.372258	0.31415	0.368252		0.549692	0.45897	0.468894	0.482974	0.421043	0.479044	0.5147	0.449944	0.502745		0.357674	0.460675	0.28217	0.308191	0.268765	0.399184	0.407176	0.468279
11:00:00	0.410682	0.390341	0.427692	0.44938	0.470712	0.481825	0.420462	0.406366	0.432336	0.40489	0.409335	0.418742	0.439418	0.444671	0.432313	0.40561	0.446058	0.448211	0.467756		0.524781	0.488587	0.402975	0.498525	0.490993	0.42526	0.457824	0.366054	0.463248		0.428052	0.493803	0.489757	0.501335	0.491054	0.45117	0.436859	0.479044
12:00:00	0.388044	0.340285	0.392618	0.43417	0.421306	0.397811	0.381642	0.37265	0.383443	0.407371	0.387093	0.334892	0.428986	0.364542	0.417817	0.392344	0.306323	0.34236	0.362342		0.559394	0.469178	0.446155	0.430676	0.403762	0.443653	0.511291	0.377207	0.441153		0.359958	0.419069	0.379075	0.443923	0.35231	0.345022	0.41036	0.343914
13:00:00	0.409042	0.393775	0.460155	0.430163	0.451249	0.410614	0.38385	0.416648	0.449541	0.412878	0.3103	0.364152	0.347915	0.309174	0.361997	0.351908	0.304654	0.365084	0.312607		0.52411	0.493778	0.418118	0.491287	0.425323	0.433347	0.528852	0.369712	0.448747		0.346047	0.355806	0.395701	0.372573	0.357114	0.321706	0.313223	0.346224
14:00:00	0.390646	0.398729	0.395096	0.41784	0.458661	0.444915	0.402853	0.384455	0.431734	0.366971	0.31828	0.312722	0.404168	0.299854	0.345164	0.313859	0.32114	0.284305	0.344885		0.53917	0.421931	0.389789	0.454128	0.454433	0.413531	0.44651	0.401693	0.435996		0.350964	0.330035	0.404207	0.317876	0.327749	0.327518	0.285997	0.35064
15:00:00	0.421564	0.389851	0.414328	0.40901	0.433362	0.389828	0.411159	0.394942	0.399737	0.439474	0.326639	0.27352	0.351841	0.269931	0.420251	0.332438	0.293519	0.379067	0.325711		0.566145	0.514968	0.441891	0.451316	0.439126	0.412059	0.564657	0.416089	0.499281		0.36971	0.402289	0.362515	0.397566	0.325462	0.308999	0.320857	0.35592
16:00:00	0.411702	0.377791	0.448574	0.438394	0.458788	0.4291	0.398343	0.375409	0.428838	0.432574	0.37244	0.335102	0.306364	0.358319	0.303594	0.339592	0.299549	0.245718	0.348479		0.52171	0.492073	0.472939	0.456293	0.493301	0.485498	0.527129	0.44476	0.420204		0.304644	0.357613	0.43492	0.393226	0.375522	0.341563	0.392008	0.374589
17:00:00	0.464309	0.429623	0.484837	0.463289	0.465887	0.461116	0.417831	0.446251	0.43367	0.471196	0.286001	0.383016	0.441914	0.329726	0.411602	0.360278	0.310429	0.346144	0.374781		0.573009	0.469312	0.481971	0.500139	0.463644	0.476095	0.495997	0.409211	0.451592		0.286492	0.35412	0.387902	0.300392	0.373578	0.340393	0.313896	0.360949
18:00:00	0.442204	0.46485	0.471614	0.420106	0.490939	0.52815	0.448763	0.448339	0.483817	0.483843	0.362511	0.382247	0.329383	0.3097	0.332874	0.317702	0.325903	0.349156	0.317552		0.52411	0.532156	0.511297	0.533801	0.470722	0.5008	0.545784	0.474003	0.498318		0.388847	0.370899	0.392173	0.359584	0.356678	0.367581	0.351169	0.393833
19:00:00	0.517242	0.502402	0.53408	0.570309	0.539084	0.530227	0.5622	0.563099	0.578997	0.551947	0.360783	0.345458	0.431043	0.378239	0.343177	0.400003	0.343252	0.374999	0.397076		0.694253	0.616511	0.619799	0.61407	0.610316	0.579975	0.610555	0.570586	0.564767		0.368309	0.377116	0.438273	0.341678	0.392708	0.346306	0.341911	0.372583
20:00:00	0.519889	0.49593	0.538433	0.547172	0.567694	0.554309	0.613132	0.569072	0.610946	0.565868	0.36268	0.315708	0.348564	0.330075	0.304462	0.278156	0.303763	0.24351	0.356529		0.668905	0.599618	0.621953	0.584034	0.568011	0.63356	0.620806	0.640787	0.58762		0.300072	0.323548	0.35749	0.385137	0.301114	0.324061	0.31118	0.363668
21:00:00	0.468486	0.505261	0.533281	0.618962	0.57715	0.505148	0.624664	0.544163	0.562198	0.562754	0.289048	0.338928	0.348548	0.338542	0.197605	0.101582	0.172919	0.303161	0.331739		0.646388	0.576076	0.584302	0.574246	0.592341	0.586546	0.587851	0.498343	0.601115		0.326501	0.320785	0.379761	0.261435	0.411392	0.334439	0.37637	0.32438
22:00:00	0.546446	0.496501	0.520612	0.647857	0.586054	0.52133	0.553842	0.551095	0.610514	0.553403	0.320537	0.401992	0.354365	0.281721	0.272161	0.166631	0.24536	0.313131	0.344413		0.670171	0.537896	0.573591	0.590354	0.553942	0.571219	0.499084	0.585246	0.590357		0.29561	0.317373	0.385813	0.350711	0.305365	0.338895	0.240111	0.26114
23:00:00	0.500329	0.436969	0.498013	0.663413	0.575244	0.546176	0.658952	0.55401	0.460739	0.521548	0.259329	0.319314	0.311179	0.240322	0.316307	0.343575	0.259388	0.147081	0.184431		0.646069	0.554158	0.548249	0.525024	0.519032	0.57096	0.563888	0.541912	0.605762		0.288286	0.342975	0.296639	0.223306	0.292487	0.304163	0.341762	0.366384
1900-01-01	0.46138	0.454228	0.477706	0.652391	0.497019	0.549724	0.67877	0.485406	0.649753	0.562875	0.302224	0.220252	0.239576	0.127928	0.190078	0.103507	0.119517	0.0566557	0.245072		0.675564	0.543575	0.558621	0.608047	0.591304	0.555715	0.609608	0.559741	0.61158		0.290255	0.254124	0.335046	0.27923	0.217234	0.314271	0.197876	0.168947
1900-01-01 01:00:00	0.439345	0.432984	0.424996	0.668285	0.570255	0.575345	0.677664	0.52313	0.54598	0.51326	0.143418	0.318118	0.354723	0.374453	0.329753	0.0738163	0.0551161	0.0776203	0.361609		0.627503	0.560625	0.539249	0.540893	0.536644	0.586581	0.544101	0.610822	0.561412		0.226853	0.325951	0.29043	0.279759	0.229107	0.300449	0.35864	0.274738
1900-01-01 02:00:00	0.515894	0.465361	0.464734	0.66659	0.546042	0.508891	0.643414	0.447493	0.520378	0.443849	0.325264	0.241707	0.190696	0.154067	0.268595	0.124844	0.129213	0.379839	0.150675		0.614459	0.525819	0.493765	0.497861	0.522206	0.544359	0.56478	0.500808	0.578549		0.251742	0.242482	0.411279	0.174599	0.226542	0.252967	0.163993	0.259154
1900-01-01 03:00:00	0.437802	0.418045	0.48305	0.637216	0.552813	0.495384	0.571238	0.558611	0.492877	0.465379	0.218807	0.258831	0.32207	0.296143	0.0951375	0.2103	0.280149	0.157558	0.198724		0.528187	0.572746	0.530255	0.553272	0.538973	0.548963	0.503653	0.572037	0.539184		0.221776	0.295933	0.203823	0.281559	0.118273	0.25695	0.253552	0.1142
1900-01-01 04:00:00	0.432774	0.383429	0.45758	0.546447	0.500988	0.438615	0.540606	0.440678	0.511143	0.482692	0.0622718	0.292241	0.251909	0.147885	0.0487629	0.265045	0.116262	0.0714092	0.182108		0.581762	0.568148	0.471629	0.527255	0.533115	0.518216	0.576836	0.514503	0.527953		0.268622	0.223877	0.384571	0.257184	0.260455	0.152901	0.290831	0.195073
1900-01-01 05:00:00	0.489611	0.369229	0.458113	0.433365	0.481062	0.492151	0.59347	0.498373	0.522027	0.467356	0.346212	0.206873	0.345323	0.180789	0.0468816	0.113626	0.053724	0.0985116	0.294614		0.571516	0.53962	0.485973	0.518076	0.520124	0.536125	0.559806	0.512101	0.550587		0.266208	0.25846	0.185605	0.193074	0.284092	0.0685559	0.229425	0.103717
1900-01-01 06:00:00	0.4735	0.452033	0.489802	0.567933	0.529182	0.546364	0.539676	0.475299	0.522535	0.488732	0.142787	0.198408	0.137797	0.198984	0.0434619	0.0537291	0.270577	0.183398	0.220834		0.664082	0.527375	0.463013	0.573382	0.535582	0.497886	0.532309	0.46362	0.555287		0.134658	0.253457	0.307932	0.255459	0.24515	0.0698187	0.23894	0.143598
1900-01-01 07:00:00	0.453481	0.420593	0.434455	0.497303	0.476162	0.5083	0.503435	0.400783	0.483017	0.381951	0.247009	0.184632	0.326006	0.159859	0.179871	0.123943	0.14849	0.341381	0.309643		0.600739	0.522329	0.443713	0.549057	0.498166	0.504812	0.510926	0.44335	0.514992		0.280442	0.273491	0.251832	0.320952	0.284225	0.241049	0.30485	0.324582
Figure 3D: Respiratory Exchange Ratio (RER) from indirect calorimetry - WEEK 1
Time of day	Female AL	Female AL	Female AL	Female AL	Female AL	Female AL	Female AL	Female AL	Female AL	Female AL	Female CR	Female CR	Female CR	Female CR	Female CR	Female CR	Female CR	Female CR	Female CR	Female CR	Male AL	Male AL	Male AL	Male AL	Male AL	Male AL	Male AL	Male AL	Male AL	Male AL	Male CR	Male CR	Male CR	Male CR	Male CR	Male CR	Male CR	Male CR	Male CR	Male CR
07:00:00	0.834478	0.97968	0.885197	1.07218	0.931459	0.931927	0.98096	1.00434	0.860434	1.02237	0.737958	0.736425	0.745898	0.737202	0.719291	0.726016	0.708069	0.718712	0.733979		0.964276	0.91287	0.848459	0.937336	0.996331	1.00491	0.921792	0.989775	0.960365		0.732861	0.73924	0.7081	0.734645	0.726677	0.7137	0.731044	0.717036
08:00:00	0.811466	0.919735	0.817327	1.0278	0.893331	0.884595	0.916895	0.935597	0.824453	0.939279	0.75396	0.756661	0.733271	0.739315	0.73834	0.735549	0.728931	0.728568	0.749679		0.900007	0.844404	0.826218	0.858492	0.927964	1.0115	0.86469	0.933799	0.918074		0.735756	0.770024	0.71406	0.752137	0.743017	0.731538	0.706838	0.743333
09:00:00	0.782592	0.852158	0.796673	0.938339	0.872204	0.914204	0.889372	0.891911	0.875841	0.873314	0.747428	0.750282	0.750142	0.748879	0.742348	0.722622	0.740335	0.733675	0.7406		0.873632	0.800262	0.809353	0.844268	0.970482	0.961217	0.827709	0.873782	0.888363		0.741749	0.744152	0.730008	0.726401	0.739632	0.720108	0.726548	0.722265
10:00:00	0.882849	0.828076	0.784568	0.861412	0.860368	0.903188	0.838254	0.85041	0.874429	0.872298	0.86133	0.842543	0.840455	0.763591	0.747402	0.718863	0.73829	0.745693	0.727344		0.851155	0.786498	0.781055	0.77902	0.89915	0.900723	0.771972	0.876092	0.828206		0.84025	0.859504	0.699989	0.747417	0.736984	0.721809	0.711253	0.750849
11:00:00	0.801945	0.86678	0.757602	0.824196	0.820289	0.918004	0.780553	0.806257	0.828543	0.863116	1.09618	1.10292	1.08654	0.961862	0.915754	0.935405	1.0115	1.01974	1.01702		0.823737	0.795179	0.829308	0.796209	0.921282	0.858028	0.749338	0.85192	0.783258		1.06894	1.05856	0.960972	0.80348	0.875415	0.91722	0.905399	0.973686
12:00:00	0.772908	0.847591	0.76551	0.826744	0.877475	0.866538	0.757436	0.76483	0.872296	0.781138	1.11209	1.121	1.09609	1.06527	1.03196	1.08148	1.0583	1.08002	1.07955		0.830678	0.785231	0.797491	0.752913	0.963539	0.869952	0.807799	0.826219	0.854726		1.08243	1.078	1.0627	1.01104	1.03394	1.0447	1.01778	1.01659
13:00:00	0.927614	0.92056	0.783031	0.975397	0.834343	0.884686	0.736394	0.88056	0.916844	0.818773	1.10374	1.12405	1.10473	1.10235	1.04862	1.07547	1.08123	1.08268	1.08913		0.800335	0.813642	0.815523	0.747163	0.906435	0.947229	0.852784	0.866577	0.815011		1.08393	1.07479	1.09309	1.03752	1.05601	1.04059	1.03365	1.02898
14:00:00	0.886819	0.85749	0.822476	0.866504	0.945985	0.94369	0.734266	0.812966	0.837985	0.887177	1.121	1.11764	1.11923	1.09546	1.0677	1.06579	1.09127	1.09154	1.08838		0.763349	0.876012	0.800275	0.775274	0.885001	0.882656	0.859061	0.804309	0.846138		1.09774	1.0807	1.08624	1.04422	1.06542	1.05044	1.03004	1.04077
15:00:00	0.843465	0.881472	0.835787	0.869806	0.885434	0.949673	0.741168	0.818311	0.849851	0.822436	1.08201	1.12579	1.11856	1.09902	1.05379	1.0919	1.11585	1.09518	1.10692		0.833733	0.914066	0.8746	0.782846	0.815013	0.912131	1.04121	0.77916	0.806223		1.10095	1.08433	1.09275	1.04246	1.07378	1.0458	1.04159	1.04861
16:00:00	0.910101	0.953073	0.939067	0.916265	0.962701	0.965462	0.748173	0.914895	0.845972	0.863843	1.12825	1.12551	1.11552	1.09484	1.06075	1.07509	1.08784	1.08852	1.08847		0.954914	0.932469	0.860174	0.782407	0.782165	1.00662	1.00049	0.779944	0.831278		1.09833	1.1004	1.10265	1.04465	1.08882	1.06317	1.03523	1.05955
17:00:00	0.951333	0.95507	0.977368	0.917007	1.0216	0.972323	0.846089	0.920175	0.860503	1.00082	1.08982	1.11779	1.131	1.08199	1.07214	1.08923	1.1139	1.09512	1.0963		0.912337	0.919473	0.922239	0.863149	0.826029	1.01822	1.05613	0.7856	0.825397		1.10189	1.07505	1.08392	1.04615	1.07373	1.05816	1.04241	1.04275
18:00:00	1.05268	1.04648	1.02792	0.95198	1.04477	1.0266	0.947393	1.07662	1.02244	0.981206	1.07893	1.10366	1.12245	1.0963	1.07094	1.08296	1.07947	1.08846	1.06799		0.964775	1.00725	0.962535	0.89565	0.862248	0.980728	1.07012	0.807977	0.848927		1.08198	1.07451	1.07985	1.06557	1.07648	1.05595	1.028	1.03818
19:00:00	1.05141	1.08792	1.07331	1.01302	1.06975	0.982663	1.00593	1.09274	0.970453	1.00295	1.00037	1.04971	1.08398	1.01776	1.04765	1.07177	1.0257	1.02507	1.03812		1.05418	1.04544	1.02049	1.00188	1.00259	0.99386	1.06394	1.01435	0.932411		1.0275	1.02439	1.06094	1.05488	1.06881	1.03564	1.01574	1.00435
20:00:00	1.07697	1.13637	1.09308	1.04378	1.09169	1.01817	1.06295	1.10729	1.05254	0.998408	0.810987	0.958584	0.998501	0.922742	1.05674	1.00646	0.955489	0.925863	0.941607		1.07156	1.05359	1.01572	1.02853	1.04325	1.0556	1.05154	1.06714	1.03592		0.905051	0.91697	1.00289	1.04156	1.00761	0.975186	0.974614	0.878597
21:00:00	1.08451	1.13371	1.09713	1.10021	1.10682	1.03115	1.07053	1.10146	1.06357	0.963861	0.747211	0.82951	0.885725	0.864832	1.00477	0.914179	0.873468	0.842191	0.822019		1.08142	1.06338	1.0636	1.03702	1.05849	1.08311	1.05701	1.08256	1.05077		0.823175	0.842209	0.886981	0.973746	0.907622	0.898129	0.881323	0.770603
22:00:00	1.06962	1.14542	1.1032	1.10154	1.1359	1.01903	1.06966	1.10092	1.06062	0.903652	0.725129	0.762125	0.801141	0.787014	0.949932	0.823114	0.801997	0.768089	0.744052		1.09125	1.07019	1.07699	1.04988	1.05566	1.07544	1.06128	1.0765	1.04969		0.772078	0.788068	0.807524	0.889424	0.81096	0.833863	0.792101	0.750947
23:00:00	1.01755	1.12994	1.10673	1.08808	1.112	1.00267	1.07322	1.10002	1.06937	0.846141	0.731816	0.748753	0.739854	0.753374	0.884381	0.773418	0.76154	0.74057	0.72637		1.09893	1.06038	1.06823	1.05427	1.05046	1.07708	1.04694	1.09268	1.04903		0.737297	0.766381	0.761653	0.800407	0.770616	0.779044	0.770603	0.729024
1900-01-01	0.913494	1.12693	1.07636	1.04722	1.10641	1.0041	1.082	1.06899	1.04857	0.830899	0.697313	0.749571	0.742791	0.729471	0.864932	0.746218	0.745512	0.753048	0.714246		1.08659	1.05508	1.06209	1.05516	1.06154	1.03541	1.01813	1.04749	1.04726		0.740788	0.768144	0.766239	0.793625	0.753848	0.740795	0.740095	0.716705
1900-01-01 01:00:00	0.96145	1.08098	1.07288	1.09376	1.0675	0.993609	1.06423	1.06437	1.02902	0.867288	0.735704	0.731053	0.726715	0.718637	0.854309	0.725888	0.746399	0.726708	0.706847		1.07064	1.06027	1.07592	1.05231	1.01708	1.06207	1.01179	1.0471	1.03989		0.726515	0.744494	0.727172	0.727943	0.732009	0.731929	0.721414	0.718487
1900-01-01 02:00:00	0.90448	1.09703	1.05692	1.1231	1.09935	0.931219	1.05267	1.0126	0.990037	0.845076	0.72022	0.736121	0.718032	0.719909	0.798165	0.73245	0.719168	0.735218	0.712993		1.06387	1.05723	1.06721	1.04653	0.989211	1.07159	0.987952	1.06087	1.03439		0.720675	0.75296	0.744904	0.743563	0.71141	0.71753	0.718309	0.718981
1900-01-01 03:00:00	0.774894	1.07961	0.973297	1.12624	1.03316	0.927951	1.06827	0.940427	1.00393	0.951053	0.723023	0.738246	0.732029	0.732263	0.777832	0.740846	0.735159	0.737528	0.714836		1.06947	1.06394	1.05757	1.04603	1.02192	1.03481	0.968203	1.05933	1.03343		0.725772	0.740957	0.727969	0.724303	0.74377	0.728726	0.723393	0.712493
1900-01-01 04:00:00	0.883594	1.02745	1.03702	1.09374	1.01758	0.950194	1.03479	0.928407	1.03619	0.86569	0.734216	0.739312	0.729647	0.744175	0.736225	0.735534	0.702312	0.716218	0.709657		1.07543	1.05838	1.05475	1.0284	1.00806	1.02321	0.938377	0.994271	1.01957		0.726425	0.753082	0.721467	0.737693	0.720855	0.722757	0.711167	0.721645
1900-01-01 05:00:00	0.827248	1.02372	0.966026	1.08935	0.980516	0.985282	1.01479	0.901458	1.01236	0.864581	0.74211	0.733053	0.744573	0.768253	0.756617	0.708073	0.728739	0.718102	0.735929		1.05907	1.04298	0.984568	1.00163	0.970457	1.05703	0.916695	1.01622	0.999135		0.735298	0.746783	0.755888	0.721943	0.735615	0.713577	0.728037	0.717979
1900-01-01 06:00:00	0.842416	0.986914	0.990764	1.09839	0.902273	0.915692	1.0257	0.867615	0.972688	0.856805	0.735055	0.745953	0.733433	0.678628	0.716277	0.712154	0.715737	0.719948	0.701967		1.04471	1.01101	0.931529	0.957523	0.993824	0.927221	0.869216	0.937564	0.980199		0.725971	0.758407	0.69807	0.737868	0.721203	0.726697	0.723655	0.722947
1900-01-01 07:00:00	0.811499	0.906613	0.885278	1.04922	0.824125	0.974534	0.979215	0.870691	0.895413	0.912324	0.727987	0.754082	0.738863	0.737021	0.737516	0.720787	0.716984	0.711557	0.733989		0.969234	0.911875	0.882568	0.868473	0.989934	0.912675	0.941744	0.935824	0.999436		0.748803	0.741668	0.732447	0.725678	0.731251	0.710934	0.730226	0.725638
Figure 3D: Respiratory Exchange Ratio (RER) from indirect calorimetry - WEEK 3
Time of day	Female AL	Female AL	Female AL	Female AL	Female AL	Female AL	Female AL	Female AL	Female AL	Female AL	Female CR	Female CR	Female CR	Female CR	Female CR	Female CR	Female CR	Female CR	Female CR	Female CR	Male AL	Male AL	Male AL	Male AL	Male AL	Male AL	Male AL	Male AL	Male AL	Male AL	Male CR	Male CR	Male CR	Male CR	Male CR	Male CR	Male CR	Male CR	Male CR	Male CR
07:00:00	0.760947	1.04144	0.960688	0.85741	0.968833	1.06698	0.896156	0.96535	0.890231	0.852446	0.771211	0.756886	0.746066	0.758086	0.759163	0.741078	0.745623	0.762159	0.737314		0.924208	1.04257	0.951246	0.999763	0.915376	1.05928	0.92366	0.913193	0.887867		0.745851	0.771546	0.76626	0.786709	0.771911	0.74885	0.756873	0.753915
08:00:00	0.837495	0.945813	0.809564	0.873346	0.836197	0.993081	0.846746	0.939393	0.81765	0.808889	0.772693	0.77068	0.75024	0.759828	0.752916	0.793284	0.764979	0.761176	0.732174		0.857235	1.02566	0.92208	0.945276	0.890424	1.04137	0.866199	0.827593	0.888463		0.764895	0.780943	0.739002	0.763437	0.755971	0.750123	0.762287	0.751594
09:00:00	0.805133	0.984124	0.776943	0.805098	0.879739	0.933353	0.816806	0.896547	0.828962	0.753122	0.762627	0.763532	0.768436	0.780414	0.767052	0.74386	0.752738	0.749309	0.73854		0.880229	1.00217	0.907429	0.944985	0.829907	1.02495	0.821034	0.812061	0.870635		0.752691	0.774662	0.756508	0.767465	0.759095	0.74363	0.751177	0.74145
10:00:00	0.818823	0.937804	0.783237	0.808977	0.833659	0.877996	0.770675	0.847899	0.834483	0.802108	0.841553	0.817618	0.817458	0.760572	0.732414	0.826237	0.778336	0.768721	0.762673		0.892881	0.957528	0.883843	0.857522	0.773587	0.921437	0.807799	0.786182	0.854791		0.834263	0.835587	0.751722	0.760266	0.744662	0.806151	0.810217	0.772709
11:00:00	0.807101	0.909239	0.879911	0.785533	0.826174	0.872135	0.743788	0.819465	0.761159	0.743468	1.11933	1.09693	1.09862	0.963401	0.940023	1.07195	1.07708	1.06712	1.05651		0.891264	0.92815	0.812757	0.881678	0.825038	0.895297	0.797777	0.75918	0.79874		1.09748	1.08055	0.949879	0.955034	0.943952	1.0228	1.02931	1.03232
12:00:00	0.780934	0.836663	0.788894	0.76523	0.77487	0.82981	0.726433	0.803839	0.73204	0.750359	1.13165	1.14143	1.1132	1.12093	1.12891	1.10968	1.15161	1.11926	1.11437		0.929626	0.883832	0.81243	0.84801	0.763709	0.900723	0.890494	0.75818	0.780453		1.11643	1.11295	1.11114	1.09734	1.12219	1.07557	1.07759	1.09458
13:00:00	0.83741	0.868832	0.863204	0.840151	0.787566	0.844218	0.737811	0.785014	0.770085	0.751885	1.17483	1.14867	1.12852	1.17084	1.16546	1.1299	1.1569	1.12035	1.13163		0.889003	0.910458	0.796546	0.914972	0.760646	0.922139	0.904975	0.747622	0.857304		1.13684	1.13054	1.1284	1.135	1.13792	1.11276	1.09087	1.09446
14:00:00	0.82523	0.854475	0.910732	0.852807	0.840664	0.839726	0.746383	0.759867	0.812243	0.718683	1.17472	1.15245	1.13522	1.14364	1.16068	1.14868	1.13798	1.13515	1.12368		0.890298	0.869025	0.791682	0.90733	0.800391	0.890977	0.905618	0.744392	0.879224		1.14975	1.15035	1.12808	1.15333	1.1278	1.10862	1.11944	1.10059
15:00:00	0.924261	0.945362	0.828863	0.831567	0.806497	0.849263	0.819661	0.757556	0.771166	0.803359	1.17712	1.17271	1.14155	1.16155	1.1312	1.15386	1.16398	1.11106	1.131		0.908033	0.905044	0.855203	0.911983	0.780083	0.886635	0.936944	0.809235	0.890918		1.15082	1.13659	1.13967	1.13308	1.13079	1.1283	1.12375	1.10447
16:00:00	0.917685	0.961567	0.982209	0.816063	0.855195	0.86572	0.78846	0.767149	0.830364	0.803381	1.13618	1.15303	1.13569	1.14162	1.16219	1.16918	1.14481	1.13974	1.12423		0.903167	0.93189	0.905199	0.849658	0.849868	0.90116	1.01461	0.827985	0.825941		1.14299	1.12579	1.11405	1.11356	1.13063	1.13097	1.12953	1.09919
17:00:00	0.962736	0.92401	1.00052	0.869906	0.861735	1.00018	0.772436	0.781439	0.902584	0.915763	1.13359	1.12629	1.10397	1.14139	1.12014	1.13983	1.15418	1.09826	1.09043		0.956712	0.925836	1.01588	0.858644	0.872401	0.886221	0.964063	0.922941	0.829		1.14752	1.11316	1.1299	1.11375	1.11091	1.08726	1.11503	1.10353
18:00:00	1.06198	1.02438	1.07431	0.790098	1.01709	1.02938	0.830793	0.770588	0.98438	0.928186	1.0692	1.1055	1.08296	1.15627	1.0999	1.116	1.10671	1.08323	1.07195		0.908793	0.972279	1.07528	0.927832	0.865997	0.906056	0.985603	0.942818	0.87853		1.11848	1.09485	1.12566	1.0885	1.10854	1.0442	1.07994	1.07584
19:00:00	1.06467	1.11382	1.08055	0.958186	1.06767	1.09367	0.995156	0.976199	0.973645	0.972864	1.05054	1.06233	1.00562	1.10668	1.09895	1.07387	1.07505	1.01924	1.02833		1.00011	0.966433	1.08316	0.951425	1.03253	0.923192	1.01502	0.985066	0.865291		1.08545	1.04712	1.07613	1.08319	1.07531	1.01778	1.08393	1.04148
20:00:00	1.07138	1.09199	1.06909	1.03615	1.0544	1.10699	1.03182	1.05197	0.992415	1.00651	0.968906	1.00425	0.912435	1.05696	0.990079	0.993447	0.998121	0.976991	0.968867		1.04063	1.03086	1.10285	1.06558	1.07608	1.03306	1.0463	1.03164	0.963646		0.984752	0.972079	0.979	0.976565	1.01633	0.981953	1.03917	0.954046
21:00:00	1.06833	1.04025	1.06948	1.05227	1.03501	1.09713	1.01656	1.0738	1.05748	1.03091	0.876022	0.930901	0.841526	0.969266	0.840043	0.870923	0.903201	0.897323	0.866991		1.0598	1.07406	1.11303	1.07838	1.07854	1.0637	1.05288	1.04552	1.03342		0.86076	0.870116	0.855786	0.903363	0.919109	0.937819	0.912676	0.817909
22:00:00	1.07493	0.948183	1.0704	1.08347	1.00749	1.10433	1.04381	1.07449	1.04494	1.01197	0.796979	0.834647	0.774456	0.874328	0.808751	0.851421	0.811505	0.852866	0.783425		1.074	1.06479	1.12144	1.07844	1.08748	1.0379	1.05733	1.04298	1.05188		0.795784	0.803406	0.781439	0.854673	0.834041	0.866438	0.818802	0.763593
23:00:00	1.07309	0.967683	1.08192	1.08281	1.02844	1.09599	1.04489	1.05617	1.04353	0.992675	0.764061	0.777016	0.727786	0.809967	0.788857	0.814189	0.78417	0.782976	0.734945		1.0792	1.06193	1.11179	1.07671	1.07679	1.04793	1.01776	1.04918	1.04842		0.757842	0.767796	0.737767	0.781	0.793157	0.838086	0.775725	0.745002
1900-01-01	1.01589	0.925272	1.05724	1.08634	1.00504	1.10079	1.0463	1.04129	1.04558	0.98956	0.742774	0.754097	0.720938	0.76554	0.758868	0.743807	0.739187	0.766214	0.718112		1.08292	1.04312	1.11544	1.06744	1.06574	1.04706	1.00889	1.0403	1.04613		0.739859	0.752746	0.738593	0.776611	0.769408	0.807968	0.743867	0.726494
1900-01-01 01:00:00	1.00785	1.03163	1.02367	1.07661	1.02919	1.1037	1.04349	1.06447	1.05878	0.979253	0.722353	0.751506	0.723111	0.774031	0.77719	0.782503	0.709661	0.77766	0.734256		1.07805	1.03189	1.10948	1.04514	1.02118	1.04118	1.02129	1.04167	1.05126		0.722416	0.760138	0.732905	0.782062	0.736711	0.796595	0.772912	0.735569
1900-01-01 02:00:00	1.02181	1.00296	1.03808	1.02857	1.02996	1.10064	1.03671	1.05506	1.05712	0.911	0.753725	0.748495	0.71513	0.755194	0.739157	0.751187	0.70781	0.759908	0.698082		1.08717	1.03081	1.0897	1.00491	1.00319	1.03204	0.999546	1.04564	1.04536		0.739077	0.753639	0.732462	0.738849	0.729841	0.769131	0.744546	0.731917
1900-01-01 03:00:00	0.941556	0.951246	1.05722	1.02626	0.996345	1.0888	1.03407	1.02713	1.04841	0.903614	0.739298	0.759367	0.7299	0.77259	0.710873	0.788319	0.737288	0.752107	0.706365		1.08044	1.05415	1.08352	1.02441	1.02821	0.991061	0.968419	1.03849	1.03293		0.758381	0.767271	0.708073	0.770195	0.748783	0.763696	0.751752	0.705993
1900-01-01 04:00:00	0.853613	0.890818	0.991827	1.04544	0.920239	1.06188	1.03295	1.05664	1.04022	0.889898	0.748792	0.747951	0.721542	0.762249	0.734851	0.763009	0.71437	0.726916	0.732595		1.05685	1.05977	1.02482	0.987863	0.994588	0.962462	0.97368	1.03711	0.986618		0.740965	0.757327	0.742739	0.784437	0.741037	0.782638	0.746351	0.730281
1900-01-01 05:00:00	0.951876	0.844736	0.955127	0.990736	0.862649	1.03752	1.00668	1.05161	1.02988	0.968231	0.764116	0.742425	0.730405	0.755935	0.710463	0.75686	0.738894	0.78999	0.749469		1.05614	1.05272	0.944796	0.98578	0.936686	1.04562	0.91986	1.01211	1.01936		0.755656	0.755327	0.712221	0.765863	0.764708	0.771505	0.750391	0.840875
1900-01-01 06:00:00	0.905689	0.927983	0.975297	1.02258	0.888559	1.04975	0.973037	1.04101	0.970015	0.892672	0.745497	0.773407	0.693385	0.741095	0.722935	0.77131	0.745429	0.756324	0.750773		1.04346	0.993952	0.958149	1.006	0.950802	0.987294	0.93837	0.978844	0.968481		0.751671	0.761917	0.743297	0.765892	0.746418	0.780085	0.762772	0.806765
1900-01-01 07:00:00	0.908625	0.991485	0.887713	0.934149	0.895659	1.03445	0.953649	0.932981	0.903802	0.790114	0.780346	0.751327	0.74808	0.747325	0.745134	0.783616	0.735067	0.765539	0.743508		0.977554	0.96574	0.854675	0.986392	0.833816	0.926166	0.829863	0.926364	0.958965		0.751545	0.771294	0.749283	0.777573	0.761317	0.776264	0.766561	0.776073

## Sheet: Figures 3B-C, 3E-G
Figures 3B, C, E, F, G: Data from Indirect Calorimetry at weeks 1 and 3
Readout	Time period	Female AL	Female AL	Female AL	Female AL	Female AL	Female AL	Female AL	Female AL	Female AL	Female AL	Female CR	Female CR	Female CR	Female CR	Female CR	Female CR	Female CR	Female CR	Female CR	Female CR	Male AL	Male AL	Male AL	Male AL	Male AL	Male AL	Male AL	Male AL	Male AL	Male AL	Male CR	Male CR	Male CR	Male CR	Male CR	Male CR	Male CR	Male CR	Male CR
Figure 3B: Energy expenditure (kcal)	Day - Week 1	4.41665	4.48273	4.42013	4.72006	4.70665	4.02261	4.35852	4.78975	5.19324	5.00104	4.40356	3.82439	4.16452	4.27024	4.31633	3.83078	4.05697	4.18026	4.21306		5.60004	5.35211	4.75216	5.33697	5.31593	5.9721	5.69182	5.16125	5.85511		4.48221	4.28205	5.23795	5.37887	4.84279	4.09999	4.38055	4.9233
Figure 3B: Energy expenditure (kcal)	Day - Week 3	4.9181	4.74824	5.13107	5.24753	5.43836	5.38301	4.9722	4.92716	5.28783	5.09448	3.96438	3.82974	4.3749	3.65104	3.97486	3.81654	3.73622	3.97451	4.00851		6.49481	5.84084	5.30817	5.77979	5.50979	5.48292	6.00325	4.8928	5.63246		3.97767	4.53147	4.40027	4.32042	4.20511	4.1188	4.29266	4.38355
Figure 3B: Energy expenditure (kcal)	NIght - Week 1	5.04316	5.33647	5.32286	6.07853	5.26269	4.4488	5.90489	5.70897	6.04252	5.55635	4.18624	3.58876	3.91704	3.52191	3.48683	3.02753	3.63117	3.85909	3.6648		7.2441	6.67834	6.41304	6.80609	6.48035	6.98594	6.83579	6.64878	7.03437		4.22549	4.1164	5.12982	4.84282	4.62367	3.8858	4.16888	4.29956
Figure 3B: Energy expenditure (kcal)	Night - Week 3	5.8027	5.41237	5.8804	7.21994	6.52259	6.26366	7.25763	6.21043	6.58809	6.17966	3.13336	3.45783	3.63579	3.04915	2.45638	2.23481	2.34924	2.40688	3.26782		7.58886	6.72217	6.4904	6.70651	6.62159	6.7301	6.77328	6.5705	6.87417		3.23889	3.53608	3.97666	3.28313	3.28392	3.06378	3.34459	2.94758
Figure 3B: Energy expenditure (kcal)	Total - Week 1	9.45981	9.8192	9.74299	10.7986	9.96934	8.47141	10.2634	10.4987	11.2358	10.5574	8.58981	7.41316	8.08156	7.79215	7.80316	6.85831	7.68814	8.03935	7.87786		12.8441	12.0305	11.1652	12.1431	11.7963	12.958	12.5276	11.81	12.8895		8.7077	8.39845	10.3678	10.2217	9.46646	7.98579	8.54943	9.22285
Figure 3B: Energy expenditure (kcal)	Total - Week 3	10.7208	10.1606	11.0115	12.4675	11.9609	11.6467	12.2298	11.1376	11.8759	11.2741	7.09774	7.28757	8.0107	6.70019	6.43124	6.05135	6.08545	6.38138	7.27634		14.0837	12.563	11.7986	12.4863	12.1314	12.213	12.7765	11.4633	12.5066		7.21656	8.06755	8.37694	7.60355	7.48903	7.18257	7.63725	7.33114
Figure 3E: RER	Total - Week 1	0.911078	0.998506	0.951635	1.00275	0.986372	0.955109	0.939236	0.956798	0.949123	0.896757	0.875661	0.897761	0.900013	0.875965	0.904869	0.87877	0.877759	0.874019	0.868917		0.972502	0.959551	0.941913	0.923912	0.959508	0.993765	0.950591	0.944634	0.936569		0.880557	0.889254	0.878167	0.87511	0.873926	0.865294	0.854594	0.847723
Figure 3E: RER	Total - Week 3	0.932934	0.957095	0.963707	0.932734	0.92555	1.00179	0.908401	0.935998	0.929057	0.882534	0.914074	0.920505	0.888257	0.925098	0.900044	0.921016	0.908317	0.907252	0.886947		0.982093	0.992456	0.982823	0.967488	0.928302	0.977031	0.951589	0.924998	0.931444		0.910443	0.911517	0.890862	0.910424	0.904968	0.911372	0.906204	0.888524
Figure 3F: RER	Postprandial - Week 1	na	na	na	na	na	na	na	na	na	na	1.10615	1.12196	1.11419	1.08982	1.05583	1.07983	1.0914	1.08884	1.09146		na	na	na	na	na	na	na	na	na	na	1.09421	1.08221	1.08689	1.03767	1.06528	1.05048	1.03345	1.03954
Figure 3F: RER	Postprandial - Week 3	na	na	na	na	na	na	na	na	na	na	1.15468	1.1491	1.12636	1.14666	1.14476	1.14185	1.15158	1.12064	1.11923		na	na	na	na	na	na	na	na	na	na	1.14073	1.12823	1.12521	1.12434	1.12671	1.10725	1.10937	1.09947
Figure 3G: FA oxidation (kcal)	Total - Week 1	3.016	1.428	2.274	1.351	1.6	1.3	2.439	2.428	2.313	3.643	3.942	2.913	3.366	3.199	2.077	2.66	3.308	3.507	3.595		2.279	2.303	2.538	3.298	1.869	1.343	2.575	2.737	3.032		3.99	3.518	4.596	4.073	4.037	3.568	4.007	4.419
Figure 3G: FA oxidation (kcal)	Total - Week 3	2.732	1.818	2.104	3.108	3.18	1.545	3.453	2.932	3.087	4.11	2.702	2.7	3.546	2.25	2.212	1.79	2.202	2.165	3.086		2.044	1.245	2.158	1.975	3.388	1.649	2.382	2.928	3.068		2.881	3.128	3.628	2.78	2.867	2.419	3.058	2.949
Figure 3C: Linear regression of Total energy expenditure (kJ) vs lean mass (g) for each group - WEEK 1
Lean mass (g)	Energy expenditure - Male AL	Energy expenditure - Male CR	Energy expenditure - Female AL	Energy expenditure - Female CR
12.5415			9.96934
12.0835			8.47141
13.1085			10.2634
13.9545			10.4987
13.851			11.2358
12.3365			10.5574
10.41			9.45981
12.182			9.8192
11.366			9.74299
13.8295			10.7986
11.1795				7.79215
12.2155				7.80316
10.57				6.85831
11.488				7.68814
11.425				8.03935
11.793				7.87786
12.7015				8.58981
11.559				7.41316
10.613				8.08156
16.8485	11.1652
17.6345	12.1431
15.858	11.7963
19.214	12.958
20.3135	12.5276
17.3345	11.81
19.384	12.8895
19.8195	12.8441
18.7145	12.0305
16.3375		10.3678
16.3265		10.2217
14.6635		9.46646
12.82		7.98579
13.946		8.54943
16.782		9.22285
13.6475		8.7077
14.7005		8.39845
