# Supplementary material for: The effects of caloric restriction on adipose tissue and metabolic health are sex- and age-dependent
Source: eLife journal article supplement (doi:10.7554/elife.88080), 2023-04-18
Supplement: supp [file Figure 4-figure supplement 1_Source_Data.xlsx]

## Sheet: Figures S7A-H, S8A-B
Figure 4-figure supplement 1A-B: OGTT data
	Group	M AL PM-Fed	M AL PM-Fed	M AL PM-Fed	M AL PM-Fed	M AL PM-Fed	M CR PM-Fed	M CR PM-Fed	M CR PM-Fed	M CR PM-Fed	M CR PM-Fed	M CR PM-Fed	F AL PM-Fed	F AL PM-Fed	F AL PM-Fed	F AL PM-Fed	F AL PM-Fed	F CR PM-Fed	F CR PM-Fed	F CR PM-Fed	F CR PM-Fed	F CR PM-Fed	F CR PM-Fed
	Study	bEX4	bEX4	bEX4	bEX4	bEX4	bEX4	bEX4	bEX4	bEX4	bEX4	bEX4	bEX4	bEX4	bEX4	bEX4	bEX4	bEX4	bEX4	bEX4	bEX4	bEX4	bEX4
	Mouse ID	35/ 5341	38/ 5344	43/ 5371	46/ 5374	55/ 5383	36/ 5342	37/ 5343	39/ 5345	44/ 5372	45/ 5373	54/ 5382	42/ 5348	48/ 5376	50/ 5378	51/ 5379	52/ 5380	40/ 5346	41/ 5347	47/ 5375	49/ 5377	53/ 5381	56/ 5384
Figure
Figure 4-figure supplement 1A: OGTT glucose (mM)	0 min	9.4	9.2	11.4	10.5	11.1	9.4	6.6	7.7	10.2	11	8.8	9.2	9	10.3	8.8	10.4	8.9	9.3	9.7	11.8	8.7	8.4
Figure 4-figure supplement 1A: OGTT glucose (mM)	15 min	14.7	13.3	20.1	17.7	18	15	11.4	9.9	13.5	13.2	13	15.5	20	13.4	15.9	13.5	16.4	17	16.4	21.4	15.4	10.8
Figure 4-figure supplement 1A: OGTT glucose (mM)	30 min	16.5	14.5	14.6	14.3	13.2	13.8	9.9	13	11.4	11.8	10.5	12.6	16.4	12.2	16.5	14.8	8.3	11.8	11	15.6	11.2	9.8
Figure 4-figure supplement 1A: OGTT glucose (mM)	60 min	14	11.2	14.1	10.4	12.7	11.2	9	10.2	10.2	10.1	9.7	11.4	13.4	9.5	10.7	12	8.2	11	10.5	10.3	9.4	7.9
Figure 4-figure supplement 1A: OGTT glucose (mM)	120 min	11.3	9.6	10.3	10.3	11.5	9.4	8.4	7.4	9.2	8.1	7.9	9.2	10.6	8	7.8	9	6.8	7.4	8.5	9	7.7	7.2
Figure 4-figure supplement 1B: OGTT AUC (mM*min)	tAUC	1631	1387	1659	1443	1567	1392	1100	1180	1271	1244	1171	1374	1658	1220	1391	1424	1073	1307	1294	1494	1202	1017
Figure 4-figure supplement 1B: OGTT AUC (mM*min)	iAUC	503.3	282.8	310.1	192	234.8	264	308.3	256.7	106.5	165.8	141.8	270	577.5	177.4	355.9	214.7	212.2	251.4	173	348.7	193.5	114.9
