# Supplementary material for: The effects of caloric restriction on adipose tissue and metabolic health are sex- and age-dependent
Source: eLife journal article supplement (doi:10.7554/elife.88080), 2023-04-18
Supplement: supp [file Figure 4_Source_Data.xlsx]

## Sheet: Figures 4A-E
Figure 4A – random-fed blood glucose (mM). Data with * have been excluded because these mice were sick after being injured during gavage for OGTT
Group	M AL Young	M AL Young	M AL Young	M AL Young	M AL Young	M AL Young	M AL Young	M AL Young	M AL Young	M AL Young	M AL Young	M AL Young	M AL Young	M AL Young	M AL Young	M AL Young	M AL Young	M AL Young	M AL Young	M AL Young	M AL Young	M AL Young	M AL Young	M AL Young	M AL Young	M AL Young	M AL Young	M AL Young	M AL Young	M AL Young	M AL Young	M AL Young	M AL Young	M AL Young	M AL Young	M AL Young	M AL Young	M AL Young	M AL Young	M AL Young	M AL Young	M AL Young	M AL Young	M AL Young	M AL Young	M AL Young	M AL Young	M AL Young	M AL Young
Study	Ben_CR	Ben_CR	Ben_CR	Ben_CR	Ben_CR	Ben_CR	Ben_CR	Ben_CR	Ben_CR	Exp054_CRTC	Exp054_CRTC	Exp054_CRTC	Exp054_CRTC	Exp054_CRTC	Exp054_CRTC	Exp054_CRTC	Exp054_CRTC	Exp054_CRTC	Exp054_CRTC	Exp054_CRTC	Exp054_CRTC	Exp054_CRTC	Exp054_CRTC	Exp054_CRTC	Exp054_CRTC	Exp054_CRTC	Exp054_CRTC	Exp054_CRTC	Exp046_Del1_WT	Exp046_Del1_WT	Exp046_Del1_WT	Exp046_Del1_WT	Exp046_Del1_WT	Exp046_Del1_WT	Exp046_Del1_WT	Exp064_CR_PETCT	Exp064_CR_PETCT	Exp064_CR_PETCT	Exp064_CR_PETCT	Exp064_CR_PETCT	Exp064_CR_PETCT	Exp064_CR_PETCT
Mouse ID	1/ 4750	6/ 4790	7/ 4791	24/ 5075	25/ 5096	26/ 5097	29/ 5100	58/ 5816	60/ 5818	78	86	88	94	96	170	172	173	292	300	313	315	A91	153	156	158	197	198	201	448110//291//3	448207//300//3	448210//303//11	469240//345//3	476354//356//1	486641//382//3	486642//383//4	0m C1	1m C1	0m C2	1m C3	3m C3	4585 C4	4587 C4
Week 0	8.1	9.3	7.3	9.9	10	11.7	11.8	10.9	13.7	12	11	14.7	10.7	10.3	7.8	8.3	8.9	11.5	10.3	10.2	12.8	9.7	12	9.8	10.3	10	9.8	8.2	9.3	10.8	11.1	10	9.1	8.7	8.9	10	8.4	9.5	10.2	10.3	9.9	12.5
Week 1		9.1	7.9	8.4	11	9.8	12.7	10.6	13.6	11.1	9.3	9.7	8.2	10				9.8	9.7	10.9	12.2	9.8	11.9	14.5	9.6	10.2	10.2	9.6	9.2	11	13.5	8.9	8.6	8.5	8.9	9.3	10.9	6	10.7	11.7
Week 2	10.8	8.7	9.3	8.4	9.5	9.3	7.9	12.4	1.1	9.6	11.3	6.3	10.1	9.8	8.9	14.7	9.4	11.5	12.3	8.4	9	8.2							7.9	9.7	12.1	9.9	7.8	8.2	8.5	11	10.2	5.8	9.4	10.6	10.3	12.9
Week 3	8.3	9.5	7.5	10	11	10.8	9.4	13.7	13.7	13.9	11.2	9.8	11	10.2	8.7	11.4	8.8	14.3	9.4	8.5	10.4	8.4							8	11.5	9	11.7	8.9	9.8	9	8.9	11.5	6.7	10.8	12.7
Week 4	9.5	10.8	7	10.1	10.6	9.5	10.4	13.2	12	8.9	9	12.3	9	9	7	10.7	9.5												7	10.8	8.9	8.4	8.1	9.9	10	10.5	10.1	4.8	11.2	11.9
Week 5	7.6	9.1	9.9	8.1				11	12.2	10.1	8.8	9.2	11	8.7	8.2	12.1	11.5												8.9	10.9	9.4	9.8	8.5	10.5	9.8	11.1	9.9	5.3	10.1	10.7
Week 6	7.5	9.7	7.7	7.8	9.4	7.2	8.9	8	8.8	12.2	10	5.2*	15.7	3.1*	11.2	10.8	13.4												6.3	9.8	10	9.4	7.5	10.5	10.7
Figure 4B – blood glucose (mM) during oral glucose tolerance tests. Injured mice were excluded from the analysis, and some mice did not undergo OGTTs.
Group	M AL Young	M AL Young	M AL Young	M AL Young	M AL Young	M AL Young	M AL Young	M AL Young	M AL Young	M AL Young	M AL Young	M AL Young	M AL Young	M AL Young	M AL Young	M AL Young	M AL Young	M AL Young	M AL Young	M AL Young	M AL Young	M AL Young	M AL Young	M AL Young	M AL Young	M AL Young	M AL Young	M AL Young	M AL Young	M AL Young	M AL Young	M AL Young	M AL Young	M AL Young	M AL Young	M AL Young	M AL Young	M AL Young	M AL Young	M AL Young	M AL Young	M AL Young	M AL Young	M AL Young	M AL Young	M AL Young	M AL Young	M AL Young	M AL Young
Study	Ben_CR	Ben_CR	Ben_CR	Ben_CR	Ben_CR	Ben_CR	Ben_CR	Ben_CR	Ben_CR	Exp054_CRTC	Exp054_CRTC	Exp054_CRTC	Exp054_CRTC	Exp054_CRTC	Exp054_CRTC	Exp054_CRTC	Exp054_CRTC	Exp054_CRTC	Exp054_CRTC	Exp054_CRTC	Exp054_CRTC	Exp054_CRTC	Exp054_CRTC	Exp054_CRTC	Exp054_CRTC	Exp054_CRTC	Exp054_CRTC	Exp054_CRTC	Exp046_Del1_WT	Exp046_Del1_WT	Exp046_Del1_WT	Exp046_Del1_WT	Exp046_Del1_WT	Exp046_Del1_WT	Exp046_Del1_WT	Exp064_CR_PETCT	Exp064_CR_PETCT	Exp064_CR_PETCT	Exp064_CR_PETCT	Exp064_CR_PETCT	Exp064_CR_PETCT	Exp064_CR_PETCT
Mouse ID	1/ 4750	6/ 4790	7/ 4791	24/ 5075	25/ 5096	26/ 5097	29/ 5100	58/ 5816	60/ 5818	78	86	88	94	96	170	172	173	292	300	313	315	A91	153	156	158	197	198	201	448110//291//3	448207//300//3	448210//303//11	469240//345//3	476354//356//1	486641//382//3	486642//383//4	0m C1	1m C1	0m C2	1m C3	3m C3	4585 C4	4587 C4
Time post-gavage (min)
0	9.5	10.8	7	10.1	11	10.8	9.4	13.2	12	13.8	12.7	Injured	9.7	Injured	8.9	10.4	10.9	13.8	10.7	11.5	13.4	12.8	No OGTT	No OGTT	No OGTT	No OGTT	No OGTT	No OGTT								10.7	11.7	7.7	9.5	12.2	5.7	12
15	19.2	22.2	15.3	15.2	18.7	16.6	17.2	22.1	21.2	15.5	20.1	Injured	20.9	Injured	15.5	17.5	19.3	19.7	16.4	14.4	15.9	12.8	No OGTT	No OGTT	No OGTT	No OGTT	No OGTT	No OGTT								14	12.4	15	11.3	16.7	14.9	21.8
30	15.1	22.3	9.7	15.5	18.4	18.3	16	20	10.1	21.3	18.1	Injured	17.8	Injured	19.4	17	18.8	17.1	15.4	13.1	13.8	14.9	No OGTT	No OGTT	No OGTT	No OGTT	No OGTT	No OGTT								15.6	11	10.2	16.5	15.7	11.1	19.1
60	13.5	16.8	7.7	13.1	17.3	17.4	11.2	14.1	12.3	20.5	20.9	Injured	17.4	Injured	17.7	15	17.8	15.2	14.8	11.6	13.7	14	No OGTT	No OGTT	No OGTT	No OGTT	No OGTT	No OGTT								14.8	14.4	20.3	17.9	16.8	9.6	12.5
120	11.7	11.7	5.7	10.5	12.6	10.5	11.5	11.7	10.7	12.3	14.5	Injured	12.3	Injured	12.4	11.7	12.6	11.4	10.2	11.2	15.4	10.7	No OGTT	No OGTT	No OGTT	No OGTT	No OGTT	No OGTT								11.6	12.7	9.2	12.3	13.3	8.4	9.7
Figure 4C – Glucose AUCs (mM*min) during oral glucose tolerance tests. Injured mice were excluded from the analysis, and some mice did not undergo OGTTs.
Group	M AL Young	M AL Young	M AL Young	M AL Young	M AL Young	M AL Young	M AL Young	M AL Young	M AL Young	M AL Young	M AL Young	M AL Young	M AL Young	M AL Young	M AL Young	M AL Young	M AL Young	M AL Young	M AL Young	M AL Young	M AL Young	M AL Young	M AL Young	M AL Young	M AL Young	M AL Young	M AL Young	M AL Young	M AL Young	M AL Young	M AL Young	M AL Young	M AL Young	M AL Young	M AL Young	M AL Young	M AL Young	M AL Young	M AL Young	M AL Young	M AL Young	M AL Young	M AL Young	M AL Young	M AL Young	M AL Young	M AL Young	M AL Young	M AL Young
Study	Ben_CR	Ben_CR	Ben_CR	Ben_CR	Ben_CR	Ben_CR	Ben_CR	Ben_CR	Ben_CR	Exp054_CRTC	Exp054_CRTC	Exp054_CRTC	Exp054_CRTC	Exp054_CRTC	Exp054_CRTC	Exp054_CRTC	Exp054_CRTC	Exp054_CRTC	Exp054_CRTC	Exp054_CRTC	Exp054_CRTC	Exp054_CRTC	Exp054_CRTC	Exp054_CRTC	Exp054_CRTC	Exp054_CRTC	Exp054_CRTC	Exp054_CRTC	Exp046_Del1_WT	Exp046_Del1_WT	Exp046_Del1_WT	Exp046_Del1_WT	Exp046_Del1_WT	Exp046_Del1_WT	Exp046_Del1_WT	Exp064_CR_PETCT	Exp064_CR_PETCT	Exp064_CR_PETCT	Exp064_CR_PETCT	Exp064_CR_PETCT	Exp064_CR_PETCT	Exp064_CR_PETCT
Mouse ID	1/ 4750	6/ 4790	7/ 4791	24/ 5075	25/ 5096	26/ 5097	29/ 5100	58/ 5816	60/ 5818	78	86	88	94	96	170	172	173	292	300	313	315	A91	153	156	158	197	198	201	448110//291//3	448207//300//3	448210//303//11	469240//345//3	476354//356//1	486641//382//3	486642//383//4	0m C1	1m C1	0m C2	1m C3	3m C3	4585 C4	4587 C4
tAUC	1658	2023	1018	1557	1934	1840	1538	1866	1510	2107	2180		1939		1904	1749	1973	1810	1645	1455	1728	1574														1655	1550	1702	1787	1850	1200	1700
iAUC	517.5	726.8	228.5	345	613.5	544.1	409.5	338.3	184.9	467.2	655.5		774.8		836.3	501	665.3	244.7	362.4	81.75	120	118.4														371.3	155.8	777.8	646.5	386.3	516	373.6
Figure 4D – Plasma insulin concentrations (ng/mL) during OGTT. Only a subset of OGTT mice were used for Insulin analysis
Group	M AL Young	M AL Young	M AL Young	M AL Young	M AL Young	M AL Young	M AL Young	M AL Young	M AL Young	M CR Young	M CR Young	M CR Young	M CR Young	M CR Young	M CR Young	M CR Young	M CR Young	M CR Young	M CR Young	M CR Young	M CR Young	M CR Young	M CR Young	M CR Young	M CR Young	M CR Young	F AL Young	F AL Young	F AL Young	F AL Young	F AL Young	F AL Young	F AL Young	F AL Young	F AL Young	F AL Young	F AL Young	F CR Young	F CR Young	F CR Young	F CR Young	F CR Young	F CR Young	F CR Young	F CR Young	F CR Young	F CR Young	F CR Young
Time post-gavage (min)
0	0.993601	1.16579	2.13479	2.7698	2.09406	1.21451	1.16905	1.13008	0.504464	2.72245	0.840546	0.742591	0.703562	0.591833	0.785515	0.507914	0.304731	0.902533	0.535853	1.1879	0.558965	0.476841	0.405322	0.666301	1.28805	1.21925	0.676013	0.582649	0.464669	0.28302	0.903391	0.723552	0.588825	0.849492	1.10828	1.20991	0.921056	1.4286	0.753305	0.330875	0.63416	0.446206	0.741061	0.356388	0.562476		0.572083	0.440603
15	1.61271	1.38619	2.84147	4.09755	3.63379	1.32447	2.09137	0.124596	2.72298	3.07747				0.815292		0.471644	0.537254	0.755601	0.769776	1.30066	0.601117	1.69831	0.828789	2.84361	0.659118	1.34362	1.31272	0.685196	0.674614	0.636706	1.63157	1.19452	1.15721	0.953947	0.861725	1.04899	0.863625	0.732506	1.08467	0.93697	0.369113	0.593283	1.16478	0.994411	1.46869	0.933782	0.719951	0.760671
30	1.31502	1.37853	2.47797	3.21366	2.99402	1.16829	1.36235	2.03667	0.0811396	1.28283	0.803048	1.48261		0.607138	0.561621	0.542091	0.366364	0.521427	0.506437	0.955374	0.973492	0.490957	0.687633	1.05516	0.689934	0.825891	1.54842	0.741826	0.57836		0.906879	0.60786	0.481546	0.75727	0.611409	0.869254	1.28385	0.735993	0.751009	0.369903	0.423517	0.601688	1.25023	0.526716	1.16286	0.935281	0.60068	0.598886
60	1.33491	1.30736	2.40934	2.17595	2.79046	0.955374	0.903063	1.50546	0.65731	2.48809	0.5	0.929318			0.450022	0.463274	0.287922	0.416585	0.503636	0.874131	0.75857	0.749742	0.484369	0.725492	0.537954	0.664054	0.958398	0.638514	0.443744		1.17611	0.703241	0.6387	0.995353	0.463667	0.840081	0.89234	0.694841	1.11298	0.284193	0.417937	0.653515	1.07514	0.397794	0.825025	0.533685	0.457694	0.373367
120	1.45889	0.946919	1.85465	2.98101	1.15813	0.944868	1.08963	1.45676	0.586132		0.915543			0.663003		0.619512			0.504336	1.09615	0.403316	0.582237	0.458961	0.688029	0.745263	0.664054	0.995131	0.724225	0.443744			1.03171	0.562476	0.788324	0.645287		0.782383		1.11375	0.343119	0.350281	0.354457	1.2047	0.462726	0.664108	0.618349	0.367718	0.620598
Figure 4E – HOMA-IR and Matsuda Index values from OGTT mice
HOMA-IR	16.6129	18.8967	36.2385	48.7853	14.6999	19.6864	18.6511	16.1544	7.21124		9.54803	7.86665	9.33895	3.70132	8.0206	7.00125	2.64477	9.67619	3.89836	9.40009	3.13906	5.17315	3.15568	6.03797	10.6858	15.4059	7.67904	5.57738	5.27832	2.5647			8.0414	9.4328	11.4576	16.2145	12.5786		5.48034	3.50513	6.79892	5.80895	7.85044	3.86638	5.59964		3.57781	3.20541
Matsuda Index	4.51504	4.40587	2.14718	1.82778	4.35161	5.06539	5.10097	4.66558	9.82108	8.09231	12.0361		18.5813	18.8934	13.8939	42.2537	16.1481	20.3938	8.80998	21.4794	12.7737	20.6129	10.8614	9.65096	7.31607	1.86594	8.63592	14.269	15.2644	59.3897			10.9036	8.89406	9.69296	8.78302	6.91615		12.4682	23.6317	15.7738	15.0958	7.99343	18.3506	10.6917		21.9177	21.9744
[truncated: 159 more columns]
