# Supplementary material for: The effects of caloric restriction on adipose tissue and metabolic health are sex- and age-dependent
Source: eLife journal article supplement (doi:10.7554/elife.88080), 2023-04-18
Supplement: supp [file Figure 5-figure supplement 1_Source_Data.xlsx]

## Sheet: Fig 5-fig supp 1
Figure 5-figure supplement 1A-B - SUV and gamma counts from PET/CT studies. Note that female 19A0131B is excluded because this mouse was accidentally injected twice with 18F-FDG
		Male AL	Male AL	Male AL	Male AL	Male AL	Male AL	Male AL	Male CR	Male CR	Male CR	Male CR	Male CR	Male CR	Male CR	Female AL	Female AL	Female AL	Female AL	Female AL	Female AL	Female AL	Female CR	Female CR	Female CR	Female CR	Female CR	Female CR	Female CR
Figure		OM	1M	OM	3M c3	1M c3	19A0131C	19A0204D	3M	4M	1M	13M c3	11M c3	19A0131A	19A0204B	10F	359F	1F	10F c3	3F c3	19A0131D	19A0204C	11F	13F	0F	11F c3	4F c3	19A0204A	19A0131B
Figure 5-figure supplement 1A: SUV (g/mL)	dTibia	0.315462	0.389358	0.981336	0.524862	0.451885	0.4964	0.497872	0.189631	0.291934	0.454266	0.301991	0.360035	0.240942	0.302645	0.193142	0.30775	0.604531	0.234403	0.717012	0.181457	0.262426	0.275238	0.141171	0.347875	0.206305	0.298457	0.298538	not assessed
Figure 5-figure supplement 1A: SUV (g/mL)	Femur	0.52482	0.611598	0.46385	0.97455	1.04327	1.04046	1.09272	0.575869	0.647081	0.503178	1.2176	1.36425	0.752969	0.689697	0.993237	0.390368	0.719093	0.944466	1.07728	0.518422	0.640713	0.442309	0.438084	0.578945	0.941122	0.977107	0.803099	not assessed
Figure 5-figure supplement 1A: SUV (g/mL)	Femur BM	0.522849	0.722143	0.551972	0.985035	1.19042	1.2209	1.13614	0.68661	0.649351	0.551197	1.43635	1.5746	0.83179	0.697594	1.31607	0.451377	0.761514	1.17647	1.31656	0.591927	0.991334	0.501469	0.479422	0.616584	1.00742	1.1294	0.950538	not assessed
Figure 5-figure supplement 1A: SUV (g/mL)	Tail	0.497386	0.429349	1.06595	0.461899	0.453906	0.770223	0.676274	0.397673	0.54925	0.660469	0.755466	0.742538	0.413935	0.529979	0.331398	0.263697	0.732819	0.951012	0.649142	0.423464	0.71417	0.387817	0.377422	0.560596	0.399524	0.619389	0.556059	not assessed
Figure 5-figure supplement 1A: SUV (g/mL)	Tail BM	1.15397	0.713384	0.754918	0.417878	0.401223	0.672688	0.696623	0.498614	0.569084	0.410973	0.632254	0.638951	0.32116	0.377853	0.325727	0.206819	0.672902	0.761542	0.621546	0.325976	0.617761	0.446942	0.390039	0.581149	0.401444	0.495631	0.51577	not assessed
Figure 5-figure supplement 1A: SUV (g/mL)	Quads	0.307084	0.236256	0.188199	0.485892	0.464683	0.512243	0.756259	0.23645	0.510493	0.322765	0.346688	1.063	1.25281	0.263068	0.175093	0.10219	0.418507	0.362586	1.07007	0.185367	0.224325	0.243359	0.316791	0.305285	0.951305	0.454015	0.299748	not assessed
Figure 5-figure supplement 1B: gamma counts (%ID/g)	Liver	3.667	1.381	5.546	2.126	1.986	1.922	1.633	3.307	2.475	5.904	2.21	2.338	2.057	0.709	4.995	3.983	1.801	2.5	2.692	2.414	3.302	7.625	3.095	5.312	2.156	3.217	3.884	5.076*
Figure 5-figure supplement 1B: gamma counts (%ID/g)	Pancreas	10	10	12	5.7	5.1	3.8	4.9	7.8	15	16	4.7	8.3	5	7	11	13	8.6	4.2	7.5	3.8	6.4	14	8.3	12	10	6.8	5	17*
Figure 5-figure supplement 1B: gamma counts (%ID/g)	Spleen	15.5842	12.4124	16.7994	6.60558	not recorded	5.33963	5.76758	16.3708	18.8666	34.8967	7.20788	not recorded	6.51342	7.69473	16.2234	16.8186	12.7833	7.93307	13.3007	4.93325	10.0935	26.2187	23.2263	22.1242	8.00587	8.49686	7.23713	18.13305*
Figure 5-figure supplement 1B: gamma counts (%ID/g)	Thymus	10.8968	11.267	15.0649	7.74323	7.36739	8.72911	6.15115	14.1847	12.7422	29.9199	11.7282	7.32067	18.7629	9.38123	27.3151	11.1076	9.64433	8.2555	9.37861	6.15431	13.922	17.9989	12.0162	13.8201	12.2842	9.15718	10.8806	26.797119*
