# Supplementary material for: The effects of caloric restriction on adipose tissue and metabolic health are sex- and age-dependent
Source: eLife journal article supplement (doi:10.7554/elife.88080), 2023-04-18
Supplement: supp [file Figure 5_Source_Data.xlsx]

## Sheet: Figures 5A, 5C
Figures 5A and 5C - SUV and gamma counts from PET/CT studies. Note that female 19A0131B is excluded because this mouse was accidentally injected twice with 18F-FDG
		Male AL	Male AL	Male AL	Male AL	Male AL	Male AL	Male AL	Male CR	Male CR	Male CR	Male CR	Male CR	Male CR	Male CR	Female AL	Female AL	Female AL	Female AL	Female AL	Female AL	Female AL	Female CR	Female CR	Female CR	Female CR	Female CR	Female CR	Female CR
Figure		OM	1M	OM	3M c3	1M c3	19A0131C	19A0204D	3M	4M	1M	13M c3	11M c3	19A0131A	19A0204B	10F	359F	1F	10F c3	3F c3	19A0131D	19A0204C	11F	13F	0F	11F c3	4F c3	19A0204A	19A0131B
Fig.5A: SUV (g/mL)	BAT	2.438	1.99352	1.50219	1.79596	1.78156	2.28873	2.13937	1.22133	1.2952	2.22205	1.86701	1.69274	2.13422	1.91533	4.5525	3.21318	3.21671	1.21634	5.99917	2.49735	3.03251	2.05374	1.48012	3.68057	2.8488	2.80052	2.71836	not assessed
Fig.5A: SUV (g/mL)	Brain	1.41004	1.24569	2.91186	1.28351	1.04833	1.50921	1.68487	1.54111	2.0288	2.54796	1.77281	2.1205	1.20627	1.90887	1.0982	1.24955	1.71027	2.01512	1.24984	1.09488	2.02238	2.25501	1.60199	1.80663	0.975297	1.76105	2.08615	not assessed
Fig.5A: SUV (g/mL)	Tibia	1.33255	0.955137	1.61624	1.26423	0.911023	0.993259	1.51545	0.637087	0.999168	0.887962	1.19737	1.00898	0.967001	1.10926	0.595501	0.949681	1.17219	1.38163	1.22494	0.820284	0.930712	0.997755	0.781647	0.815848	0.690403	0.934837	1.01112	not assessed
Fig.5A: SUV (g/mL)	Tibia BM	1.48554	1.01108	1.67218	1.32816	0.837514	1.35301	1.26559	0.694234	0.856097	1.0697	1.5903	1.23915	1.09277	1.20091	0.501956	0.729054	1.2638	1.59508	1.45041	1.10727	0.821718	0.972514	0.81335	0.967416	0.943096	0.987279	0.860571	not assessed
Fig.5A: SUV (g/mL)	Heart	0.570652	0.555022	0.324306	0.679334	0.600284	0.550399	0.551556	0.274033	0.287618	0.30528	0.465075	0.427515	0.337536	0.324142	1.40821	0.688286	0.900009	0.315203	2.09043	1.14109	0.88123	0.622697	0.440023	0.820309	0.991541	1.05677	0.619216	not assessed
Fig.5C: gamma counts (%ID/g)	Gastroc	6.2475	7.37564	6.0297	5.4256	8.11593	9.95042	13.242	6.06549	11.263	5.93015	9.63541	8.65421	10.0743	9.04182	7.80517	5.37966	7.1968	7.35079	4.91537	4.85841	7.31724	5.38683	5.39248	6.20079	7.13028	8.19886	9.72866	8.617297458*
Fig.5C: gamma counts (%ID/g)	iWAT	2.0316	12.9104	17.0283	3.16041	5.36406	2.18485	3.15172	11.2787	8.31713	10.0688	16.4892	5.73116	6.28801	9.90345	9.90116	8.69613	4.64066	6.77722	10.332	3.11157	5.59183	6.6577	14.8056	6.16038	4.87398	28.5843	8.65571	53.49763352*
Fig.5C: gamma counts (%ID/g)	gWAT	0.944029	4.62333	4.67016	1.39588	1.26434	0.98205	1.79365	7.28121	5.09251	21.3143	0.852207	1.95607	8.67317	3.81395	8.23228	11.1594	4.8484	10.9981	8.52138	3.44661	3.98739	10.9914	14.0007	9.47947	10.0357	4.76759	6.03181	35.45887828*
Fig.5C: gamma counts (%ID/g)	mWAT	4.06414	12.0256	16.774	5.1233		3.53799	3.94053	10.8219	9.846	67.0257	2.11744	5.80205	10.4203	11.104	8.29608	9.40404	10.3689	19.8342	13.5016	6.26604	5.19591	17.3617	15.0549	32.0837	10.066	12.2835	5.66443	44.46563658*
Fig.5C: gamma counts (%ID/g)	pWAT	1.66128	8.1374	22.2697	2.98272	2.28409	1.12166	5.85273	14.8365	14.0107	30.7769	1.07372	4.91838	11.7229	15.5202	12.8414	12.1575	3.9489	5.97454	10.3238	3.05558	3.93113	13.2908	9.51965	11.9796	6.10043	7.57882	4.50075	36.65273129*
Fig.5C: gamma counts (%ID/g)	WAT (all)	1.56821	8.42928	11.7088	2.42597	2.75905	1.5565	3.03864	9.81005	7.90981	22.2089	6.81692	4.09851	8.45354	7.99701	9.87689	10.1357	5.41237	10.7083	10.0525	3.43717	5.2344	10.7071	13.3744	10.2733	8.03163	15.5226	6.92757	46.22167026*
Fig.5C: gamma counts (%ID/g)	Humerus	8.2511	12.8694	8.1469	5.9004	9.17544	6.28357	9.69766	9.42789	4.88027	10.3485	10.0163	8.96021	7.33357	8.02263	9.38389	12.8857	12.8098	9.08439	11.1048	8.25929	11.3643	16.492	9.90538	16.171	7.67635	8.50618	8.57649	24.637815*
Fig.5C: gamma counts (%ID/g)	Forearm	7.95785	5.34635	9.10947	6.2175	7.45078	7.39442	7.00082	8.65364	6.36217	9.25232	8.42542	7.2958	2.57584	6.38998	37.3942	27.6554	37.963	11.5657	15.4357	not recorded	7.14885	30.9845	35.739	36.2974	9.91396	10.2028	6.0447	11.806233*
Fig.5C: gamma counts (%ID/g)	All bones	7.0939	8.56679	10.4981	5.73533	7.58654	8.05763	7.79284	8.37807	9.40845	10.7243	7.75717	8.04174	8.30772	9.46542	9.53948	9.51852	11.2122	7.14758	8.23924	8.23018	9.88742	11.5996	11.6594	12.9363	7.43446	6.41968	7.81503	18.179482*
Fig.5C: gamma counts (%ID/g)	Kidneys	3.9537	7.6338	7.7215	3.3405	3.6297	3.1722	3.4877	7.3223	7.282	8.4634	5.356	4.148	6.0141	5.5632	6.7727	6.0619	7.5747	5.2363	5.3215	4.4523	7.6827	15.074	9.7686	15.336	6.7072	6.5363	7.4564	23.122*
