# Supplementary material for: The effects of caloric restriction on adipose tissue and metabolic health are sex- and age-dependent
Source: eLife journal article supplement (doi:10.7554/elife.88080), 2023-04-18
Supplement: supp [file Figure 6-figure supplement 1_Source_Data.xlsx]

## Sheet: Fig 6-fig supp 1
Figure 6-figure supplement 1A-C: Hepatic ceramide and dihydroceramide (DHC) content
	Group	M AL Young	M AL Young	M AL Young	M AL Young	M AL Young	M AL Young	M CR Young	M CR Young	M CR Young	M CR Young	M CR Young	M CR Young	F AL Young	F AL Young	F AL Young	F AL Young	F AL Young	F AL Young	F CR Young	F CR Young	F CR Young	F CR Young	F CR Young	F CR Young
	Mouse ID	78	86	94	170	172	173	79	87	89	90	95	171	80	81	92	97	174	177	83	98	175	176	178	179
Figure	Ceramide species
Figure 6-figure supplement 1A: Ceramides (pmol/100 mg liver)	16:0	1199.45	1284.02	1178.12	773.836	1069.84	988.452	2507.13	2336.44	1656.38	1932.03	1795.83	1480.27	1531.05	1366.05	874.281	1668.05	1016.26	1168.66	1373.4	1793.2	1380.65	1672.12	1327.9	1583.28
Figure 6-figure supplement 1A: Ceramides (pmol/100 mg liver)	18:0	251.14	273.938	325.782	135.458	218.643	255.395	949.853	564.289	585.776	531.334	640.39	614.234	524.495	486.317	284.982	505.365	445.391	507.895	678.147	838.049	475.899	711.664	498.737	664.579
Figure 6-figure supplement 1A: Ceramides (pmol/100 mg liver)	20:0	818.625	897.138	965.63	455.125	726.535	865.298	890.104	421.813	554.787	857.603	778.826	694.21	1046.92	293.492	526.438	1230.44	389.587	903.704	711.037	293.817	219.285	278.072	858.114	387.126
Figure 6-figure supplement 1A: Ceramides (pmol/100 mg liver)	22:0	4277.32	5173.23	3543.86	3471.52	3670.44	3988.06	2038.94	1968.31	2010.91	1725.9	1634.33	1465.55	1955.1	1349.66	1257.45	1879.8	1326.93	1900.01	1138.74	1218.87	1141.38	969.901	1383.84	1239.94
Figure 6-figure supplement 1A: Ceramides (pmol/100 mg liver)	22:1	918.2	818.991	966.939	555.498	706.458	741.439	346.521	336.674	326.61	336.883	224.523	352.936	218.006	104.551	135.677	335.544	143.248	183.271	159.005	94.659	90.613	134.661	245.8	156.374
Figure 6-figure supplement 1A: Ceramides (pmol/100 mg liver)	23:0	1025.25	1232.45	736.387	686.96	897.182	1015.99	1850.67	1479.71	1366.84	1645.54	1390.82	1173.05	1716.82	1351.18	1029.21	1393.44	1231.15	1514.56	1076.26	1489.61	1405.65	1023.04	1451.52	1476.69
Figure 6-figure supplement 1A: Ceramides (pmol/100 mg liver)	24:0	1842.13	2704.26	1455.27	1771.14	1623.23	2431.56	2625.29	2133.93	1920.91	2270.41	2040.23	1669.04	2970.05	2187.12	1852.95	2672.24	2017.75	2731.22	1830.46	2212.64	2034.68	1644.13	2474.59	2173.35
Figure 6-figure supplement 1A: Ceramides (pmol/100 mg liver)	24:1	2869.27	3373.27	2622.58	2216.63	2343.49	3062.23	3497.13	5469.21	3191.74	3453.36	2595.64	2395.92	3799.09	2314.72	2549.45	3725.53	1989.8	3202.3	2460.07	2262.92	2235.8	1837.07	3222.61	2314.04
Figure 6-figure supplement 1A: Ceramides (pmol/100 mg liver)	14:0	12.332	16.917	12.552	8.016	9.725	16.471	58.441	29.435	28.489	45.046	38.943	32.55	35.225	29.793	17.978	48.859	20.617	52.393	44.796	49.586	52.209	35.421	51.969	58.023
Figure 6-figure supplement 1A: Ceramides (pmol/100 mg liver)	18:1	3.856	5.833	6.104	3.608	3.994	7.267	15.318	20.308	16.082	17.389	13.361	12.455	10.286	10.12	4.037	15.436	7.048	6.996	9.971	17.348	10.23	11.793	8.438	15.609
Figure 6-figure supplement 1A: Ceramides (pmol/100 mg liver)	20:1	13.146	11.293	21.31	6.234	9.117	13.466	32.761	15.93	24.187	32.069	23.053	28.192	18.521	20.006	11.263	36.291	22.302	14.445	17.603	19.041	10.268	24.644	19.529	24.913
Figure 6-figure supplement 1A: Ceramides (pmol/100 mg liver)	23:1	87.153	101.325	60.888	52.813	67.997	86.302	112.949	100.462	83.641	93.83	74.827	62.674	54.718	46.711	32.55	72.172	47.374	44.924	49.134	43.541	59.313	28.58	46.27	55.32
Figure 6-figure supplement 1A: Ceramides (pmol/100 mg liver)	26:0	5.599	11.193	4.567	5.716	7.356	5.549	23.366	15.26	13.799	22.103	14.58	13.369	16.966	12.193	10.461	22.965	11.851	15.145	15.224	15.019	8.628	15.951	23.505	16.821
Figure 6-figure supplement 1A: Ceramides (pmol/100 mg liver)	26:1	9.838	12.481	8.448	7.053	8.265	11.227	29.489	21.547	20.873	28.139	24.372	15.62	20.27	12.59	11.039	20.318	20.913	15.684	13.633	15.99	15.845	12.104	24.127	20.304
Figure 6-figure supplement 1B: DHCs (pmol/100 mg liver)	16:0	68.329	55.53	123.401	41.006	46.231	46.498	202.431	134.979	141.772	165.971	137.807	93.161	248.757	159.839	68.221	128.033	105.779	90.732	153.534	190.689	121.295	172.322	144.858	169.012
Figure 6-figure supplement 1B: DHCs (pmol/100 mg liver)	18:0	21.175	26.805	47.483	14.489	23.097	22.101	167.989	72.413	122.672	115.666	103.779	100.736	175.575	103.526	44.761	122.65	96.447	82.182	158.392	170.06	78.444	183.962	138.047	110.655
Figure 6-figure supplement 1B: DHCs (pmol/100 mg liver)	20:0	36.002	29.133	70.643	21.521	25.528	35.048	77.126	26.588	82.617	87.691	57.3	60.918	51.667	47.551	20.524	52.922	71.583	52.036	45.221	51.311	27.808	71.013	67.805	71.897
Figure 6-figure supplement 1B: DHCs (pmol/100 mg liver)	22:0	152.463	135.83	181.386	114.431	115.861	125.775	114.94	49.896	139.84	122.353	98.639	86.867	121.612	124.323	51.629	99.808	138.313	112.803	84.746	93.99	75.313	108.814	87.052	108.031
Figure 6-figure supplement 1B: DHCs (pmol/100 mg liver)	22:1	34.148	29.496	66.505	18.553	21.6	21.947	29.957	13.622	36.897	32.127	16.437	25.345	36.361	15.337	12.317	28.186	37.693	15.459	10.095	13.567	7.841	40.487	32.401	30.311
Figure 6-figure supplement 1B: DHCs (pmol/100 mg liver)	23:0	27.295	39.128	38.496	21.689	29.09	32.816	144.099	57.746	123.752	122.875	99.382	61.626	104.05	115.33	57.829	98.388	104.751	101.477	95.159	100.27	86.828	105.845	91.381	133.087
Figure 6-figure supplement 1B: DHCs (pmol/100 mg liver)	24:0	66.018	75.828	71.231	54.056	68.78	84.405	183.299	69.796	178.253	182.119	137.907	96.76	167.503	171.697	84.536	169.444	177.386	157.971	125.825	126.442	113.342	134.134	141.847	156.89
Figure 6-figure supplement 1B: DHCs (pmol/100 mg liver)	24:1	104.491	106.358	155.255	92.947	93.044	114.817	221.844	172.805	296.742	230.927	201.676	144.026	415.252	302.968	166.956	281.102	283.108	228.377	249.969	240.24	200.941	248.412	323.152	324.229
Figure 6-figure supplement 1B: DHCs (pmol/100 mg liver)	14:0	0.865	1.266	1.519	1.18	0.923	1.115	6.313	3.727	6.181	8.611	4.642	3.578	0.986	0.562	1.89	1.284	0.76	2.056	3.317	2.644	2.857	5.186	2.002	2.805
Figure 6-figure supplement 1B: DHCs (pmol/100 mg liver)	18:1	3.87	1.616	4.655	0.658	1.168	2.411	8.51	7.312	9.783	14.106	12.041	4.734	6.431	4.408	2.796	4.699	2.77	4.2	5.766	11.119	4.341	7.374	2.052	5.13
Figure 6-figure supplement 1B: DHCs (pmol/100 mg liver)	20:1	not detected	not detected	1.701	not detected	not detected	not detected	4.381	1.368	5.611	6.988	3.569	4.447	3.802	1.636	0.924	5.165	2.668	1.198	3.917	4.88	1.262	8.62	2.641	4.323
Figure 6-figure supplement 1B: DHCs (pmol/100 mg liver)	26:0	not detected	not detected	not detected	not detected	not detected	not detected	not detected	not detected	not detected	not detected	not detected	0.937	0.158	0.112	0.338	0.718	0.317	0.175	0.124	0.099	0.14	0.124	0.88	0.721
Figure 6-figure supplement 1B: DHCs (pmol/100 mg liver)	26:1	0.531	1.111	0.81	0.61	0.62	0.988	2.279	1.324	1.739	1.347	0.852	1.44	0.346	1.388	0.538	1.354	0.124	2.298	0.615	0.138	0.734	1.365	3.331	2.726
Figure 6-figure supplement 1C: Ceramide:DHC ratio	16:0	17.5541	23.123	9.54705	18.8713	23.1412	21.2579	12.3851	17.3096	11.6834	11.6408	13.0315	15.8893	6.15482	8.5464	12.8154	13.0283	9.60743	12.8804	8.94524	9.40381	11.3826	9.70347	9.16692	9.36786
Figure 6-figure supplement 1C: Ceramide:DHC ratio	18:0	11.8602	10.2197	6.86102	9.34902	9.46629	11.5558	5.65426	7.79265	4.77514	4.59369	6.17071	6.09746	2.9873	4.69753	6.36675	4.12038	4.61799	6.18012	4.28145	4.92796	6.06674	3.86854	3.61281	6.00587
Figure 6-figure supplement 1C: Ceramide:DHC ratio	20:0	22.7383	30.7946	13.6692	21.1479	28.4603	24.6889	11.5409	15.8648	6.71517	9.77983	13.5921	11.3958	20.2629	6.17215	25.6499	23.25	5.44245	17.3669	15.7236	5.7262	7.88568	3.91579	12.6556	5.38445
Figure 6-figure supplement 1C: Ceramide:DHC ratio	22:0	28.0548	38.086	19.5377	30.3372	31.6797	31.7079	17.7392	39.4483	14.3801	14.1059	16.5688	16.8712	16.0765	10.8561	24.3556	18.8342	9.59366	16.8436	13.4371	12.9681	15.1552	8.91338	15.8967	11.4777
Figure 6-figure supplement 1C: Ceramide:DHC ratio	22:1	26.8888	27.7662	14.5393	29.9411	32.7064	33.7832	11.5673	24.7155	8.85194	10.486	13.6596	13.9253	5.9956	6.81691	11.0154	11.9046	3.80039	11.8553	15.7509	6.97715	11.5563	3.32603	7.58619	5.15899
Figure 6-figure supplement 1C: Ceramide:DHC ratio	23:0	37.5618	31.4978	19.1289	31.6732	30.8416	30.9602	12.8431	25.6244	11.045	13.392	13.9947	19.035	16.5	11.7158	17.7975	14.1627	11.7531	14.9251	11.3101	14.856	16.1889	9.66544	15.8843	11.0957
Figure 6-figure supplement 1C: Ceramide:DHC ratio	24:0	27.9035	35.6631	20.4303	32.7649	23.6003	28.8083	14.3225	30.5738	10.7763	12.4666	14.7943	17.2493	17.7313	12.7382	21.9191	15.7706	11.3749	17.2894	14.5477	17.4992	17.9517	12.2574	17.4455	13.8527
Figure 6-figure supplement 1C: Ceramide:DHC ratio	24:1	27.4595	31.7162	16.8921	23.8484	25.1868	26.6706	15.7639	31.6496	10.7559	14.9543	12.8704	16.6353	9.14887	7.64015	15.2702	13.2533	7.02842	14.022	9.8415	9.41942	11.1266	7.39526	9.97241	7.13704
Figure 6-figure supplement 1C: Ceramide:DHC ratio	14:0	14.2566	13.3626	8.26333	6.79322	10.5363	14.7722	9.25725	7.89777	4.60912	5.23122	8.38927	9.09726	35.7252	53.0125	9.51217	38.0522	27.1276	25.483	13.505	18.7542	18.2741	6.83012	25.9585	20.6856
Figure 6-figure supplement 1C: Ceramide:DHC ratio	18:1	0.996382	3.60953	1.31128	5.48328	3.41952	3.0141	1.8	2.77735	1.64387	1.23274	1.10963	2.63097	1.59944	2.29583	1.44385	3.28495	2.5444	1.66571	1.72928	1.56021	2.3566	1.59927	4.11209	3.04269
Figure 6-figure supplement 1C: Ceramide:DHC ratio	20:1	N/A	N/A	12.5279	N/A	N/A	N/A	7.47797	11.6447	4.31064	4.58915	6.45923	6.33955	4.87138	12.2286	12.1894	7.02633	8.35907	12.0576	4.494	3.90184	8.13629	2.85893	7.39455	5.7629
Figure 6-figure supplement 1C: Ceramide:DHC ratio	26:0	N/A	N/A	N/A	N/A	N/A	N/A	N/A	N/A	N/A	N/A	N/A	14.2679	107.38	108.866	30.9497	31.9847	37.3849	86.5429	122.774	151.707	61.6286	128.637	26.7102	23.3301
Figure 6-figure supplement 1C: Ceramide:DHC ratio	26:1	18.5273	11.234	10.4296	11.5623	13.3306	11.3634	12.9394	16.2742	12.0029	20.8901	28.6056	10.8472	58.5838	9.07061	20.5186	15.0059	168.653	6.82507	22.1675	115.87	21.5872	8.8674	7.24317	7.44828
