# Supplementary material for: The effects of caloric restriction on adipose tissue and metabolic health are sex- and age-dependent
Source: eLife journal article supplement (doi:10.7554/elife.88080), 2023-04-18
Supplement: supp [file Figure 6_Source_Data.xlsx]

## Sheet: Figures 6A, 6B-C
Figure 6A: hepatic triglyceride data (including raw data from assays)
	Group	M AL Young	M AL Young	M AL Young	M AL Young	M AL Young	M AL Young	M AL Young	M AL Young	M AL Young	M AL Young	M CR Young	M CR Young	M CR Young	M CR Young	M CR Young	M CR Young	M CR Young	M CR Young	M CR Young	F AL Young	F AL Young	F AL Young	F AL Young	F AL Young	F AL Young	F AL Young	F CR Young	F CR Young	F CR Young	F CR Young	F CR Young	F CR Young	F CR Young	F CR Young
	Mouse ID	169	181	188	210	269	291	296	304	323	339	170	171	183	268	290	298	325	342	346	178	186	201	208	275	311	344	175	187	195	213	274	310	341	351
Fig.6A: Liver Triglycerides (background data for analysis)	Liver mass (mg)	64.1	65.9	82.7	57	49.6	84.9	79.2	83.3	51.4	41.3	73.3	52.3	54.4	54	71	68.5	58.2	52.1	45	55.1	62.3	78.3	52.6	46.5	67.6	55.8	69.1	66.7	63.5	56.3	58.7	77.4	42.7	74
Fig.6A: Liver Triglycerides (background data for analysis)	Liver mass (g)	0.0641	0.0659	0.0827	0.057	0.0496	0.0849	0.0792	0.0833	0.0514	0.0413	0.0733	0.0523	0.0544	0.054	0.071	0.0685	0.0582	0.0521	0.045	0.0551	0.0623	0.0783	0.0526	0.0465	0.0676	0.0558	0.0691	0.0667	0.0635	0.0563	0.0587	0.0774	0.0427	0.074
Fig.6A: Liver Triglycerides (background data for analysis)	Absorbance 1	0.1585	0.255	0.2588	0.2913	0.3171	0.347	0.196	0.2721	0.1923	0.2015	0.3777	0.3175	0.3042	0.1682	0.1867	0.2252	0.2604	0.1428	0.1461	0.3257	0.6626	0.3031	0.3575	0.136	0.2997	0.1907	0.489	0.4161	0.279	0.1967	0.1659	0.1897	0.1384	0.356
Fig.6A: Liver Triglycerides (background data for analysis)	Absorbance 2	0.158	0.2318	0.2581	0.2718	0.3415	0.402	0.2161	0.2826	0.1833	0.2353	0.3217	0.2922	0.2992	0.1763	0.1956	0.2456	0.2997	0.1592	0.1624	0.3362	0.6863	0.2645	0.42	0.1454	0.0925	0.192	0.4729	0.4041	0.2799	0.2005	0.1755	0.1991	0.1487	0.3121
Fig.6A: Liver Triglycerides (background data for analysis)	Average	0.15825	0.2434	0.25845	0.28155	0.3293	0.3745	0.20605	0.27735	0.1878	0.2184	0.3497	0.30485	0.3017	0.17225	0.19115	0.2354	0.28005	0.151	0.15425	0.33095	0.67445	0.2838	0.38875	0.1407	0.1961	0.19135	0.48095	0.4101	0.27945	0.1986	0.1707	0.1944	0.14355	0.33405
Fig.6A: Liver Triglycerides (background data for analysis)	Blank absorbance	0.08655	0.08655	0.08655	0.08655	0.08655	0.08655	0.08655	0.08655	0.08655	0.08655	0.08655	0.08655	0.08655	0.08655	0.08655	0.08655	0.08655	0.08655	0.08655	0.08655	0.08655	0.08655	0.08655	0.08655	0.08655	0.08655	0.08655	0.08655	0.08655	0.08655	0.08655	0.08655	0.08655	0.08655
Fig.6A: Liver Triglycerides (background data for analysis)	Corrected to blank	0.0717	0.15685	0.1719	0.195	0.24275	0.28795	0.1195	0.1908	0.10125	0.13185	0.26315	0.2183	0.21515	0.0857	0.1046	0.14885	0.1935	0.06445	0.0677	0.2444	0.5879	0.19725	0.3022	0.05415	0.10955	0.1048	0.3944	0.32355	0.1929	0.11205	0.08415	0.10785	0.057	0.2475
Fig.6A: Liver Triglycerides (background data for analysis)	Slope from standard curve	0.0673172	0.0673172	0.0673172	0.0673172	0.0673172	0.0673172	0.0673172	0.0673172	0.0673172	0.0673172	0.0673172	0.0673172	0.0673172	0.0673172	0.0673172	0.0673172	0.0673172	0.0673172	0.0673172	0.0673172	0.0673172	0.0673172	0.0673172	0.0673172	0.0673172	0.0673172	0.0673172	0.0673172	0.0673172	0.0673172	0.0673172	0.0673172	0.0673172	0.0673172
Fig.6A: Liver Triglycerides (background data for analysis)	Interpolated µg TG (in 2 µL homogenate)	1.06511	2.33001	2.55358	2.89673	3.60606	4.27751	1.77518	2.83434	1.50407	1.95864	3.90911	3.24286	3.19606	1.27308	1.55384	2.21117	2.87445	0.957408	1.00569	3.63057	8.73328	2.93016	4.48919	0.804401	1.62737	1.55681	5.85883	4.80635	2.86554	1.66451	1.25005	1.60212	0.846738	3.67662
Fig.6A: Liver Triglycerides (background data for analysis)	µg TG in 1 mL homogenate (total volume)	532.553	1165.01	1276.79	1448.37	1803.03	2138.76	887.589	1417.17	752.037	979.319	1954.55	1621.43	1598.03	636.539	776.919	1105.59	1437.23	478.704	502.843	1815.29	4366.64	1465.08	2244.6	402.2	813.685	778.404	2929.42	2403.18	1432.77	832.254	625.026	801.058	423.369	1838.31
Fig.6A: Liver Triglycerides (background data for analysis)	µg TG per g liver	8308.17	17678.4	15438.8	25409.9	36351.4	25191.5	11206.9	17012.9	14631.1	23712.3	26665.1	31002.5	29375.6	11787.8	10942.5	16140	24694.6	9188.17	11174.3	32945.3	70090.5	18711.1	42673	8649.47	12036.8	13949.9	42393.8	36029.6	22563.3	14782.5	10647.8	10349.6	9914.96	24842.1
Fig.6A: Liver Triglycerides - FINAL DATA REPORTED	Total liver TG (mg/g)	8.30817	17.6784	15.4388	25.4099	36.3514	25.1915	11.2069	17.0129	14.6311	23.7123	26.6651	31.0025	29.3756	11.7878	10.9425	16.14	24.6946	9.18817	11.1743	32.9453	70.0905	18.7111	42.673	8.64947	12.0368	13.9499	42.3938	36.0296	22.5633	14.7825	10.6478	10.3496	9.91496	24.8421
Figures 6B-C, S10A-C: Hepatic ceramide and dihydroceramide (DHC) content
	Group	M AL Young	M AL Young	M AL Young	M AL Young	M AL Young	M AL Young	M CR Young	M CR Young	M CR Young	M CR Young	M CR Young	M CR Young	F AL Young	F AL Young	F AL Young	F AL Young	F AL Young	F AL Young	F CR Young	F CR Young	F CR Young	F CR Young	F CR Young	F CR Young
	Mouse ID	78	86	94	170	172	173	79	87	89	90	95	171	80	81	92	97	174	177	83	98	175	176	178	179
Figure	Species
Fig.6B: Ceramides (pmol/100 mg liver)	Total	13333.3	15916.3	11908.4	10149.6	11362.3	13488.7	14978	14913.3	11801	12991.6	11289.7	10010.1	13917.5	9584.5	8597.78	13626.5	8690.23	12261.2	9577.48	10364.3	9140.46	8399.15	11637	10186.4
Fig.6B: Ceramides (pmol/100 mg liver)	22:0	4277.32	5173.23	3543.86	3471.52	3670.44	3988.06	2038.94	1968.31	2010.91	1725.9	1634.33	1465.55	1955.1	1349.66	1257.45	1879.8	1326.93	1900.01	1138.74	1218.87	1141.38	969.901	1383.84	1239.94
Fig.6B: Ceramides (pmol/100 mg liver)	23:0	1025.25	1232.45	736.387	686.96	897.182	1015.99	1850.67	1479.71	1366.84	1645.54	1390.82	1173.05	1716.82	1351.18	1029.21	1393.44	1231.15	1514.56	1076.26	1489.61	1405.65	1023.04	1451.52	1476.69
Fig.6C: DHCs (pmol/100 mg liver)	Total	515.536	502.257	763.085	381.238	426.355	488.357	1163.17	611.575	1145.86	1090.78	874.032	684.575	583.26	476.165	252.368	452.618	460.936	388.821	376.533	366.92	315.158	384.036	469.21	484.567
Fig.6C: DHCs (pmol/100 mg liver)	22:0	152.463	135.83	181.386	114.431	115.861	125.775	114.94	49.896	139.84	122.353	98.639	86.867	121.612	124.323	51.629	99.808	138.313	112.803	84.746	93.99	75.313	108.814	87.052	108.031
Fig.6C: DHCs (pmol/100 mg liver)	23:0	27.295	39.128	38.496	21.689	29.09	32.816	144.099	57.746	123.752	122.875	99.382	61.626	104.05	115.33	57.829	98.388	104.751	101.477	95.159	100.27	86.828	105.845	91.381	133.087
Fig.6C: Ceramide:DHC ratio	Total	25.863	31.6896	15.6056	26.6228	26.6498	27.6206	12.8769	24.3851	10.2988	11.9104	12.9168	14.6223	23.8616	20.1285	34.0684	30.1059	18.8534	31.5343	25.436	28.2467	29.0028	21.8707	24.8012	21.0216

## Sheet: Figure 6D
eig
	eigenvalue	percentage of variance	cumulative percentage of variance
comp 1	12.8081	47.4373	47.4373
comp 2	3.7995	14.072	61.5093
comp 3	2.8293	10.4787	71.9881
comp 4	2.4383	9.0306	81.0187
comp 5	1.449	5.3668	86.3855
comp 6	0.8672	3.2118	89.5972
comp 7	0.6474	2.3977	91.9949
comp 8	0.5382	1.9934	93.9883
comp 9	0.4492	1.6637	95.6519
comp 10	0.2584	0.9571	96.609
comp 11	0.2321	0.8596	97.4686
comp 12	0.1955	0.7241	98.1927
comp 13	0.1145	0.4242	98.617
comp 14	0.0971	0.3595	98.9765
comp 15	0.0866	0.3206	99.2971
comp 16	0.073	0.2702	99.5673
comp 17	0.0429	0.1588	99.7261
comp 18	0.0298	0.1104	99.8365
comp 19	0.019	0.0706	99.9071
comp 20	0.0117	0.0434	99.9505
comp 21	0.0088	0.0328	99.9833
comp 22	0.0035	0.0129	99.9962
comp 23	0.001	0.0038	100
var
coord
	Dim.1	Dim.2	Dim.3
Cer.14.0	0.8441	-0.153	-0.214
Cer.16.0	0.7712	0.3625	-0.2319
Cer.18.0	0.883	-0.0958	-0.0027
Cer.18.1	0.8146	0.1509	-0.1859
Cer.20.0	-0.0025	0.6736	0.0199
Cer.20.1	0.7772	0.265	0.3267
Cer.22.0	-0.7229	0.6341	0.0091
Cer.22.1	-0.6785	0.6746	0.1899
Cer.23.0	0.8277	0.1873	-0.36
Cer.23.1	0.0439	0.8706	-0.2954
Cer.24.0	0.3968	0.3192	-0.4429
Cer.24.1	0.2292	0.6241	-0.5614
Cer.26.0	0.8839	0.1033	-0.1558
Cer.26.1	0.8496	0.2846	-0.1745
DHC.14.0	0.6491	0.2426	0.0634
DHC.16.0	0.8474	-0.0349	0.1278
DHC.18.0	0.881	-0.2043	0.1582
DHC.18.1	0.7152	0.2062	0.0718
DHC.20.0	0.7148	0.2096	0.6092
DHC.20.1	0.8085	-0.0605	0.3878
DHC.22.0	-0.237	0.495	0.7125
DHC.22.1	0.0181	0.4604	0.7785
DHC.23.0	0.9266	-0.1374	0.1171
DHC.24.0	0.8428	-0.0386	0.1936
DHC.24.1	0.7544	-0.2372	0.1582
DHC.26.0	0.2756	-0.3273	0.0253
DHC.26.1	0.4563	0.1509	-0.0797
cor
	Dim.1	Dim.2	Dim.3
Cer.14.0	0.8441	-0.153	-0.214
Cer.16.0	0.7712	0.3625	-0.2319
Cer.18.0	0.883	-0.0958	-0.0027
Cer.18.1	0.8146	0.1509	-0.1859
Cer.20.0	-0.0025	0.6736	0.0199
Cer.20.1	0.7772	0.265	0.3267
Cer.22.0	-0.7229	0.6341	0.0091
Cer.22.1	-0.6785	0.6746	0.1899
Cer.23.0	0.8277	0.1873	-0.36
Cer.23.1	0.0439	0.8706	-0.2954
Cer.24.0	0.3968	0.3192	-0.4429
Cer.24.1	0.2292	0.6241	-0.5614
Cer.26.0	0.8839	0.1033	-0.1558
Cer.26.1	0.8496	0.2846	-0.1745
DHC.14.0	0.6491	0.2426	0.0634
DHC.16.0	0.8474	-0.0349	0.1278
DHC.18.0	0.881	-0.2043	0.1582
DHC.18.1	0.7152	0.2062	0.0718
DHC.20.0	0.7148	0.2096	0.6092
DHC.20.1	0.8085	-0.0605	0.3878
DHC.22.0	-0.237	0.495	0.7125
DHC.22.1	0.0181	0.4604	0.7785
DHC.23.0	0.9266	-0.1374	0.1171
DHC.24.0	0.8428	-0.0386	0.1936
DHC.24.1	0.7544	-0.2372	0.1582
DHC.26.0	0.2756	-0.3273	0.0253
DHC.26.1	0.4563	0.1509	-0.0797
cos2
	Dim.1	Dim.2	Dim.3
Cer.14.0	0.7126	0.0234	0.0458
Cer.16.0	0.5947	0.1314	0.0538
Cer.18.0	0.7798	0.0092	0
Cer.18.1	0.6636	0.0228	0.0346
Cer.20.0	0	0.4538	0.0004
Cer.20.1	0.604	0.0702	0.1067
Cer.22.0	0.5226	0.4021	0.0001
Cer.22.1	0.4603	0.4551	0.036
Cer.23.0	0.6851	0.0351	0.1296
Cer.23.1	0.0019	0.7579	0.0873
Cer.24.0	0.1574	0.1019	0.1961
Cer.24.1	0.0525	0.3895	0.3152
Cer.26.0	0.7814	0.0107	0.0243
Cer.26.1	0.7218	0.081	0.0304
DHC.14.0	0.4214	0.0589	0.004
DHC.16.0	0.718	0.0012	0.0163
DHC.18.0	0.7762	0.0417	0.025
DHC.18.1	0.5114	0.0425	0.0052
DHC.20.0	0.511	0.0439	0.3712
DHC.20.1	0.6537	0.0037	0.1504
DHC.22.0	0.0562	0.2451	0.5077
DHC.22.1	0.0003	0.212	0.606
DHC.23.0	0.8586	0.0189	0.0137
DHC.24.0	0.7103	0.0015	0.0375
DHC.24.1	0.5691	0.0563	0.025
DHC.26.0	0.076	0.1071	0.0006
DHC.26.1	0.2082	0.0228	0.0063
contrib
	Dim.1	Dim.2	Dim.3
Cer.14.0	5.5636	0.6161	1.6187
Cer.16.0	4.6432	3.4586	1.9011
Cer.18.0	6.088	0.2414	0.0003
Cer.18.1	5.1807	0.599	1.2218
Cer.20.0	0.0001	11.9436	0.0141
Cer.20.1	4.7159	1.8478	3.773
Cer.22.0	4.0799	10.5836	0.003
Cer.22.1	3.594	11.9778	1.2741
Cer.23.0	5.349	0.9229	4.5797
Cer.23.1	0.015	19.9476	3.0845
Cer.24.0	1.229	2.6821	6.9327
Cer.24.1	0.4103	10.2519	11.14
Cer.26.0	6.1006	0.2809	0.8574
Cer.26.1	5.6359	2.1315	1.0757
DHC.14.0	3.29	1.5489	0.142
DHC.16.0	5.6059	0.032	0.577
DHC.18.0	6.0601	1.098	0.8851
DHC.18.1	3.9931	1.1193	0.1824
DHC.20.0	3.9896	1.1558	13.1192
DHC.20.1	5.1037	0.0964	5.3154
DHC.22.0	0.4386	6.4496	17.9438
DHC.22.1	0.0026	5.5785	21.4189
DHC.23.0	6.7038	0.4971	0.4845
DHC.24.0	5.5458	0.0392	1.3243
DHC.24.1	4.443	1.481	0.8844
DHC.26.0	0.593	2.8197	0.0226
DHC.26.1	1.6258	0.5997	0.2244
ind
coord
	Group	Dim.1	Dim.2	Dim.3
1	Male AL	-6.6583	-1.1417	-0.1333
2	Male AL	-5.9112	0.0731	-0.1024
3	Male AL	-4.8055	1.7076	-0.7721
4	Male AL	-5.4602	2.1559	0.6638
5	Male AL	-4.4852	3.1258	-1.2635
6	Male AL	-4.2078	2.3617	4.28
7	Male CR	6.1403	3.2051	-0.727
8	Male CR	0.7722	1.623	-4.4305
9	Male CR	2.8677	1.3882	1.769
10	Male CR	5.0506	2.8309	0.721
11	Male CR	0.2396	-0.9049	0.5527
12	Male CR	2.0563	0.3798	-0.4499
13	Female AL	2.7506	0.6049	-0.0608
14	Female AL	0.4395	-2.1332	0.2379
15	Female AL	-3.3939	-3.1761	-1.4266
16	Female AL	2.8717	1.2508	-0.5222
17	Female AL	-0.1749	-1.664	2.2789
18	Female AL	0.3833	-0.4674	-1.2699
19	Female CR	0.8811	-2.1594	-0.212
20	Female CR	2.8235	-2.1023	-0.4114
21	Female CR	-0.5837	-2.6729	-1.9213
22	Female CR	2.4554	-2.2502	2.9806
23	Female CR	2.4454	-0.6717	-0.4472
24	Female CR	3.5032	-1.363	0.6663
cos2
	Group	Dim.1	Dim.2	Dim.3
1	Male AL	0.9441	0.0278	0.0004
2	Male AL	0.9662	0.0001	0.0003
3	Male AL	0.8161	0.1031	0.0211
4	Male AL	0.8295	0.1293	0.0123
5	Male AL	0.5798	0.2816	0.046
6	Male AL	0.3912	0.1233	0.4048
7	Male CR	0.7058	0.1923	0.0099
8	Male CR	0.0168	0.074	0.5517
9	Male CR	0.4355	0.1021	0.1657
10	Male CR	0.6079	0.191	0.0124
11	Male CR	0.0041	0.0589	0.022
12	Male CR	0.386	0.0132	0.0185
13	Female AL	0.2617	0.0127	0.0001
14	Female AL	0.017	0.4008	0.005
15	Female AL	0.4247	0.372	0.075
16	Female AL	0.3356	0.0637	0.0111
17	Female AL	0.0019	0.1707	0.3202
18	Female AL	0.0114	0.017	0.1256
19	Female CR	0.0755	0.4536	0.0044
20	Female CR	0.3515	0.1949	0.0075
21	Female CR	0.0223	0.4668	0.2412
22	Female CR	0.2196	0.1844	0.3236
23	Female CR	0.2202	0.0166	0.0074
24	Female CR	0.555	0.084	0.0201
contrib
	Group	Dim.1	Dim.2	Dim.3
1	Male AL	14.4223	1.4295	0.0262
2	Male AL	11.3671	0.0059	0.0154
3	Male AL	7.5123	3.1977	0.878
4	Male AL	9.699	5.0969	0.6488
5	Male AL	6.5443	10.7148	2.3512
6	Male AL	5.7599	6.1169	26.9773
7	Male CR	12.2653	11.2655	0.7783
8	Male CR	0.194	2.8886	28.9083
9	Male CR	2.6753	2.1135	4.6086
10	Male CR	8.2982	8.7884	0.7655
11	Male CR	0.0187	0.898	0.4499
12	Male CR	1.3756	0.1582	0.298
13	Female AL	2.4614	0.4013	0.0054
14	Female AL	0.0628	4.9904	0.0833
15	Female AL	3.7471	11.0627	2.9974
16	Female AL	2.6828	1.7158	0.4016
17	Female AL	0.0099	3.0365	7.6485
18	Female AL	0.0478	0.2396	2.3749
19	Female CR	0.2525	5.1137	0.0662
20	Female CR	2.5935	4.8467	0.2493
21	Female CR	0.1108	7.8349	5.4365
22	Female CR	1.9614	5.5526	13.083
23	Female CR	1.9454	0.4948	0.2945
24	Female CR	3.9924	2.0374	0.6538
dist
6.85276	6.01382	5.31929	5.99506	5.89024	6.7272	7.30882	5.96471	4.34533	6.47749	3.72862	3.30982	5.37677	3.36943	5.20768	4.95689	4.0272	3.58326	3.20618	4.7623	3.91202	5.23964	5.2108	4.70246
svd
vs
3.57884	1.94922	1.68204	1.5615	1.20376	0.931222	0.804591	0.733637	0.670215	0.508344	0.48175	0.442175	0.338447	0.311562	0.2942	0.270111	0.207051	0.172677	0.138021	0.108294	0.0940706	0.0591088	0.031935
U
	-1.8605	-0.5857	-0.0792
	-1.6517	0.0375	-0.0609
	-1.3427	0.876	-0.459
	-1.5257	1.106	0.3946
	-1.2532	1.6036	-0.7512
	-1.1757	1.2116	2.5445
	1.7157	1.6443	-0.4322
	0.2158	0.8326	-2.634
	0.8013	0.7122	1.0517
	1.4112	1.4523	0.4286
	0.067	-0.4643	0.3286
	0.5746	0.1948	-0.2674
	0.7686	0.3103	-0.0361
	0.1228	-1.0944	0.1414
	-0.9483	-1.6294	-0.8482
	0.8024	0.6417	-0.3105
	-0.0489	-0.8537	1.3549
	0.1071	-0.2398	-0.755
	0.2462	-1.1078	-0.126
	0.7889	-1.0785	-0.2446
	-0.1631	-1.3713	-1.1423
	0.6861	-1.1544	1.772
	0.6833	-0.3446	-0.2658
	0.9789	-0.6993	0.3961
V
	0.2359	-0.0785	-0.1272
	0.2155	0.186	-0.1379
	0.2467	-0.0491	-0.0016
	0.2276	0.0774	-0.1105
	-0.0007	0.3456	0.0119
	0.2172	0.1359	0.1942
	-0.202	0.3253	0.0054
	-0.1896	0.3461	0.1129
	0.2313	0.0961	-0.214
	0.0123	0.4466	-0.1756
	0.1109	0.1638	-0.2633
	0.0641	0.3202	-0.3338
	0.247	0.053	-0.0926
	0.2374	0.146	-0.1037
	0.1814	0.1245	0.0377
	0.2368	-0.0179	0.076
	0.2462	-0.1048	0.0941
	0.1998	0.1058	0.0427
	0.1997	0.1075	0.3622
	0.2259	-0.0311	0.2306
	-0.0662	0.254	0.4236
	0.0051	0.2362	0.4628
	0.2589	-0.0705	0.0696
	0.2355	-0.0198	0.1151
	0.2108	-0.1217	0.094
	0.077	-0.1679	0.015
	0.1275	0.0774	-0.0474
quali.sup
coord
	Dim.1	Dim.2	Dim.3
Female	1.2001	-1.4004	-0.009
Male	-1.2001	1.4004	0.009
AL	-2.3876	0.2248	0.1591
CR	2.3876	-0.2248	-0.1591
cos2
	Dim.1	Dim.2	Dim.3
Female	0.3651	0.4971	0
Male	0.3651	0.4971	0
AL	0.8758	0.0078	0.0039
CR	0.8758	0.0078	0.0039
v.test
	Dim.1	Dim.2	Dim.3
Female	1.6082	-3.4454	-0.0256
Male	-1.6082	3.4454	0.0256
AL	-3.1996	0.5531	0.4537
CR	3.1996	-0.5531	-0.4537
dist
1.98613	1.98613	2.55137	2.55137
eta2
	Dim.1	Dim.2	Dim.3
Sex	0.1125	0.5161	0
Diet	0.4451	0.0133	0.009
