# Supplementary material for: The effects of caloric restriction on adipose tissue and metabolic health are sex- and age-dependent
Source: eLife journal article supplement (doi:10.7554/elife.88080), 2023-04-18
Supplement: supp [file Figure 7-figure supplement 1_Source_Data.xlsx]

## Sheet: Fig 7-fig supp 1
Figure 7-figure supplement 1D - RNAseq data
Normalised counts from RNAseq	Sex	Male	Male	Male	Male	Male	Male	Male	Male	Male	Male	Male	Female	Female	Female	Female	Female	Female	Female	Female	Female	Female	Female
	Diet	AL	AL	AL	AL	AL	AL	CR	CR	CR	CR	CR	AL	AL	AL	AL	AL	CR	CR	CR	CR	CR	CR
	Mouse ID	X181	X210	X291	X296	X339	A	X183	X268	X298	X325	B	X201	X186	X311	X610	X609	X175	X187	X213	X274	X351	X613
	GeneName	Counts.normalised	Counts.normalised	Counts.normalised	Counts.normalised	Counts.normalised	Counts.normalised	Counts.normalised	Counts.normalised	Counts.normalised	Counts.normalised	Counts.normalised	Counts.normalised	Counts.normalised	Counts.normalised	Counts.normalised	Counts.normalised	Counts.normalised	Counts.normalised	Counts.normalised	Counts.normalised	Counts.normalised	Counts.normalised		Average	STDEV
Biosynthesis of unsaturated fatty acids	Acot3	442.929	327.645	806.168	1707.84	579.802	813.513	9201.24	3665.56	5891.82	3724.24	6114.53	4339.47	1959.21	4247.14	2906.29	1805.25	6337.24	11363.6	7110.4	11110.7	7690.48	8532.18		4576.24	3490.59
	Acot4	519.297	392.389	585.748	595.096	527.092	671.1	1950.03	1266.62	1647.58	1480.91	1574.22	1051.7	721.706	1319.65	892.64	742.09	1729.88	3048.03	2141.18	2289.38	1455.35	1922.38		1296.55	700.25
	Acot5	5.4548	5.88584	3.0614	9.03617	6.70845	1.95087	51.6759	24.4167	44.9991	31.1192	38.4944	30.5395	14.5589	39.1699	25.0273	15.1447	36.7458	105.005	60.9239	58.9248	55.5082	44.4539		32.2184	25.1296
	Acot7	634.938	565.041	700.04	1024.96	521.342	558.925	1151.5	1048.9	1111.68	1127.62	1128.49	610.79	597.955	613.662	593.355	575.498	780.142	995.136	1140.85	1297.31	840.428	1031.33		847.722	257.105
	Elovl6	1202.24	630.766	971.484	735.802	456.174	1158.82	10200.6	68533.6	7792.01	3106.43	5248.4	839.836	1076.32	2260.66	838.414	549.247	6685.85	9147.93	13923.1	26015.8	14590	10553.4		8478.04	14886.4
	Fads1	13742.8	11639.2	16541.8	15267.2	13410.2	10175.7	34579	26739.3	27002.5	15400.4	24030.6	15983.6	9677.52	24172.5	13147.7	18822.8	34290.4	33803.8	34179.3	28214.4	26124.4	35122.5		21912.2	8904.9
	Fads2	13978.5	13425.6	19262.3	14712.2	14556.4	10419.6	41938.4	26379.2	30268	16198.5	30913	14834.6	9604.73	22499.4	9991.1	13669.6	49452.3	44482.5	40332.6	29146.5	31214.7	41595		24494.3	12692.8
	Scd2	300.014	173.632	115.313	232.359	120.752	212.645	299.33	763.022	435.673	253.53	246.161	128.839	157.028	367.451	155.378	167.601	367.458	384.375	442.189	480.093	355.599	366.498		296.588	153.775
Fatty acid biosynthesis	Acaca	1860.09	1258.59	1591.93	1791.74	1382.9	1652.39	7984.42	35765.4	7305.2	4310.93	5300.07	1562.29	1720.03	2342.73	1509.98	1413.5	6760.29	6434.19	7788.43	14720.6	7733.85	8853.24		5956.49	7545.56
	Acacb	2538.66	1357.67	1862.35	3360.16	1658.9	1763.59	6125.06	14044.7	5255.69	3901.8	3763.33	1959.3	2201.52	5536.95	1708.11	1346.87	7991.74	6839.75	9859.84	9919.66	5611.53	6621.65		4783.13	3401.97
	Acsl3	219.283	171.67	153.07	222.032	180.17	245.81	477.759	1483.31	551.239	404.55	579.442	293.943	165.348	203.311	169.977	290.778	499.366	515.39	750.739	875.179	581.101	652.978		440.293	315.26
	Acsl4	565.117	436.533	590.85	396.3	494.508	473.086	1161.25	1650.16	1183.27	1042.49	797.239	485.769	758.104	930.752	719.534	900.604	1559.34	1309.19	1450.38	1260.61	1082.41	1211.12		929.937	386.42
	Acsl5	7998.91	7302.36	7622.88	8248.73	6663.41	6862.19	13185.2	18702.2	12461.7	9076.75	9738.06	7598.61	5758.05	11149.4	9134.96	6370.87	13117.3	13950.2	13097.6	18265.7	12016.7	13348		10530.4	3684.97
	Fasn	4330.02	3023.36	4127.79	6113.61	2297.16	3328.19	27679.8	218575	25785.5	9871.21	18580.6	4192.5	4421.75	5731.86	3521.55	3442.89	27989.9	16204.4	22228.4	49611.8	62575	31645.2		25239.9	46159.7
Log(2) for normalised counts	Sex	Male	Male	Male	Male	Male	Male	Male	Male	Male	Male	Male	Female	Female	Female	Female	Female	Female	Female	Female	Female	Female	Female
	Diet	AL	AL	AL	AL	AL	AL	CR	CR	CR	CR	CR	AL	AL	AL	AL	AL	CR	CR	CR	CR	CR	CR
	Mouse ID	X181	X210	X291	X296	X339	A	X183	X268	X298	X325	B	X201	X186	X311	X610	X609	X175	X187	X213	X274	X351	X613
	GeneName	Z score	Z score	Z score	Z score	Z score	Z score	Z score	Z score	Z score	Z score	Z score	Z score	Z score	Z score	Z score	Z score	Z score	Z score	Z score	Z score	Z score	Z score		Average	STDEV
Biosynthesis of unsaturated fatty acids	Acot3	8.79093	8.35599	9.65494	10.738	9.17942	9.66802	13.1676	11.8398	12.5245	11.8627	12.578	12.0833	10.9361	12.0523	11.505	10.818	12.6296	13.4721	12.7957	13.4397	12.9089	13.0587		11.5481	1.56735
	Acot4	9.02041	8.61614	9.19414	9.21698	9.04191	9.39038	10.9293	10.3068	10.6861	10.5323	10.6204	10.0385	9.49527	10.3659	9.80193	9.53545	10.7565	11.5737	11.0642	11.1607	10.5072	10.9087		10.1256	0.829027
	Acot5	2.44753	2.55725	1.61419	3.17571	2.74598	0.964119	5.69142	4.6098	5.49183	4.95974	5.26658	4.9326	3.86383	5.29167	4.64543	3.92074	5.19951	6.71431	5.92894	5.8808	5.79463	5.47424		4.41686	1.54691
	Acot7	9.31047	9.14221	9.45129	10.0014	9.02609	9.12651	10.1693	10.0347	10.1185	10.1391	10.1402	9.25453	9.22389	9.2613	9.21275	9.16867	9.60759	9.95875	10.1559	10.3413	9.71498	10.0103		9.66226	0.446659
	Elovl6	10.2315	9.30096	9.92405	9.52317	8.83344	10.1784	13.3164	16.0645	12.9278	11.601	12.3577	9.71396	10.0719	11.1425	9.71152	9.10131	12.7069	13.1592	13.7652	14.6671	13.8327	13.3654		11.6135	2.08087
	Fads1	13.7464	13.5067	14.0138	13.8982	13.711	13.3128	15.0776	14.7067	14.7208	13.9107	14.5526	13.9643	13.2404	14.5611	13.6825	14.2002	15.0655	15.0449	15.0608	14.7841	14.6731	15.1001		14.297	0.620721
	Fads2	13.7709	13.7127	14.2335	13.8447	13.8294	13.347	15.356	14.6871	14.8855	13.9836	14.9159	13.8567	13.2295	14.4576	13.2864	13.7387	15.5938	15.4409	15.2997	14.831	14.9299	15.3441		14.3898	0.766248
	Scd2	8.22888	7.43989	6.84941	7.86021	6.9159	7.7323	8.22559	9.57558	8.7671	7.98601	7.94346	7.00942	7.29488	8.52141	7.27964	7.38889	8.52144	8.58637	8.78852	8.90717	8.47411	8.51766		8.03699	0.731841
Fatty acid biosynthesis	Acaca	10.8612	10.2976	10.6366	10.8071	10.4335	10.6903	12.963	15.1263	12.8347	12.0738	12.3718	10.6094	10.7482	11.194	10.5603	10.4651	12.7229	12.6515	12.9271	13.8455	12.917	13.112		11.8568	1.35586
	Acacb	11.3099	10.4069	10.8629	11.7143	10.696	10.7843	12.5805	13.7777	12.3597	11.9299	11.8778	10.9361	11.1043	12.4349	10.7382	10.3954	12.9643	12.7397	13.2673	13.2761	12.4542	12.693		11.8774	1.03674
	Acsl3	7.77665	7.4235	7.25805	7.79462	7.49321	7.9414	8.90014	10.5346	9.10653	8.66017	9.17852	8.19939	7.36936	7.66754	7.4092	8.18377	8.96395	9.00952	9.55217	9.77343	9.18265	9.35089		8.48769	0.924359
	Acsl4	9.14241	8.76995	9.20665	8.63045	8.94985	8.88596	10.1815	10.6884	10.2086	10.0258	9.63887	8.92413	9.56625	9.86225	9.49092	9.81475	10.6067	10.3545	10.5022	10.2999	10.08	10.2421		9.73055	0.645152
	Acsl5	12.9656	12.8341	12.8961	13.01	12.702	12.7445	13.6866	14.1909	13.6052	13.148	13.2494	12.8915	12.4914	13.4447	13.1572	12.6373	13.6792	13.768	13.677	14.1569	13.5527	13.7043		13.2815	0.491091
	Fasn	12.0802	11.5619	12.0112	12.5778	11.1656	11.7005	14.7565	17.7378	14.6543	13.269	14.1815	12.0336	12.1104	12.4848	11.782	11.7494	14.7726	13.9841	14.4401	15.5984	15.9333	14.9497		13.4334	1.7608
Z scores shown in heatmaps	Sex	Male	Male	Male	Male	Male	Male	Male	Male	Male	Male	Male	Female	Female	Female	Female	Female	Female	Female	Female	Female	Female	Female	Male	Male	Male	Male	Male	Female	Female	Female	Female	Female	Female
	Diet	AL	AL	AL	AL	AL	AL	CR	CR	CR	CR	CR	AL	AL	AL	AL	AL	CR	CR	CR	CR	CR	CR	CR	CR	CR	CR	CR	CR	CR	CR	CR	CR	CR
	Mouse ID	X181	X210	X291	X296	X339	A	X183	X268	X298	X325	B	X201	X186	X311	X610	X609	X175	X187	X213	X274	X351	X613	X183	X268	X298	X325	B	X175	X187	X213	X274	X351	X613
	GeneName	Z score	Z score	Z score	Z score	Z score	Z score	Z score	Z score	Z score	Z score	Z score	Z score	Z score	Z score	Z score	Z score	Z score	Z score	Z score	Z score	Z score	Z score	Z score	Z score	Z score	Z score	Z score	Z score	Z score	Z score	Z score	Z score	Z score
Biosynthesis of unsaturated fatty acids	Acot3	-1.75916	-2.03666	-1.20791	-0.51692	-1.5113	-1.19956	1.03325	0.186092	0.622931	0.200711	0.657083	0.341441	-0.390524	0.321644	-0.0275512	-0.465861	0.690014	1.22754	0.795974	1.20683	0.868161	0.963763	1.03325	0.186092	0.622931	0.200711	0.657083	0.690014	1.22754	0.795974	1.20683	0.868161	0.963763
	Acot4	-1.33309	-1.82074	-1.12354	-1.09599	-1.30716	-0.886821	0.969451	0.218547	0.676156	0.490557	0.596887	-0.105026	-0.760306	0.28993	-0.390396	-0.711838	0.76098	1.74672	1.13218	1.24864	0.460265	0.944598	0.969451	0.218547	0.676156	0.490557	0.596887	0.76098	1.74672	1.13218	1.24864	0.460265	0.944598
	Acot5	-1.27308	-1.20215	-1.81179	-0.802341	-1.08014	-2.23203	0.823945	0.124727	0.694916	0.350945	0.549303	0.333407	-0.357504	0.565528	0.147762	-0.320715	0.505947	1.48519	0.977487	0.946372	0.890664	0.683547	0.823945	0.124727	0.694916	0.350945	0.549303	0.505947	1.48519	0.977487	0.946372	0.890664	0.683547
	Acot7	-0.787588	-1.1643	-0.472312	0.759184	-1.42428	-1.19945	1.13518	0.833764	1.02153	1.06749	1.07	-0.912828	-0.981423	-0.897676	-1.00637	-1.10507	-0.122381	0.663807	1.10518	1.5203	0.118045	0.779198	1.13518	0.833764	1.02153	1.06749	1.07	-0.122381	0.663807	1.10518	1.5203	0.118045	0.779198
	Elovl6	-0.664135	-1.11133	-0.811891	-1.00454	-1.336	-0.689638	0.818352	2.13903	0.631608	-0.0059794	0.357628	-0.912849	-0.740841	-0.226326	-0.914024	-1.20727	0.525458	0.742835	1.03404	1.46747	1.06648	0.841921	0.818352	2.13903	0.631608	-0.0059794	0.357628	0.525458	0.742835	1.03404	1.46747	1.06648	0.841921
	Fads1	-0.887084	-1.27322	-0.456237	-0.642589	-0.94403	-1.58553	1.25755	0.659968	0.682734	-0.622412	0.411724	-0.536014	-1.70221	0.425406	-0.989981	-0.155988	1.23807	1.20485	1.23053	0.784769	0.605892	1.2938	1.25755	0.659968	0.682734	-0.622412	0.411724	1.23807	1.20485	1.23053	0.784769	0.605892	1.2938
	Fads2	-0.807625	-0.883604	-0.203935	-0.711305	-0.73135	-1.36085	1.26099	0.388066	0.646984	-0.530099	0.686682	-0.695707	-1.51417	0.088535	-1.43991	-0.849693	1.57128	1.37187	1.18747	0.575896	0.704966	1.2455	1.26099	0.388066	0.646984	-0.530099	0.686682	1.57128	1.37187	1.18747	0.575896	0.704966	1.2455
	Scd2	0.262204	-0.815891	-1.62274	-0.241561	-1.53188	-0.416334	0.257708	2.10235	0.997635	-0.0696582	-0.127805	-1.40409	-1.01404	0.661913	-1.03487	-0.885581	0.661951	0.750679	1.0269	1.18902	0.597282	0.656792	0.257708	2.10235	0.997635	-0.0696582	-0.127805	0.661951	0.750679	1.0269	1.18902	0.597282	0.656792
Fatty acid biosynthesis	Acaca	-0.734306	-1.14996	-0.899954	-0.774137	-1.04973	-0.86029	0.815873	2.4114	0.721273	0.16006	0.379855	-0.919953	-0.817599	-0.488834	-0.956188	-1.02644	0.638787	0.586181	0.789428	1.46681	0.781945	0.92578	0.815873	2.4114	0.721273	0.16006	0.379855	0.638787	0.586181	0.789428	1.46681	0.781945	0.92578
	Acacb	-0.547461	-1.4184	-0.978565	-0.157331	-1.13955	-1.05439	0.678165	1.83297	0.465149	0.0506383	0.000354514	-0.907946	-0.745746	0.537693	-1.09887	-1.42951	1.04835	0.831743	1.34066	1.34908	0.556312	0.786647	0.678165	1.83297	0.465149	0.0506383	0.000354514	1.04835	0.831743	1.34066	1.34908	0.556312	0.786647
	Acsl3	-0.769231	-1.15128	-1.33027	-0.749788	-1.07586	-0.590999	0.446194	2.21442	0.669481	0.186595	0.747356	-0.311895	-1.20985	-0.887267	-1.16675	-0.32879	0.515233	0.564528	1.15158	1.39095	0.751819	0.933833	0.446194	2.21442	0.669481	0.186595	0.747356	0.515233	0.564528	1.15158	1.39095	0.751819	0.933833
	Acsl4	-0.911639	-1.48896	-0.812062	-1.70518	-1.2101	-1.30914	0.698915	1.48468	0.740935	0.45768	-0.142111	-1.24998	-0.254668	0.20414	-0.371434	0.130509	1.35808	0.967066	1.1961	0.882505	0.541701	0.792956	0.698915	1.48468	0.740935	0.45768	-0.142111	1.35808	0.967066	1.1961	0.882505	0.541701	0.792956
	Acsl5	-0.64325	-0.9109	-0.784705	-0.552904	-1.1799	-1.09354	0.82499	1.85187	0.659205	-0.271889	-0.0652902	-0.794074	-1.6089	0.332323	-0.25311	-1.31179	0.809834	0.990686	0.805426	1.7825	0.552372	0.861054	0.82499	1.85187	0.659205	-0.271889	-0.0652902	0.809834	0.990686	0.805426	1.7825	0.552372	0.861054
	Fasn	-0.768539	-1.06285	-0.807729	-0.48591	-1.28792	-0.984144	0.751449	2.44456	0.693366	-0.0933593	0.424873	-0.794983	-0.751363	-0.538739	-0.937874	-0.956382	0.760579	0.312759	0.57174	1.22956	1.41976	0.861147	0.751449	2.44456	0.693366	-0.0933593	0.424873	0.760579	0.312759	0.57174	1.22956	1.41976	0.861147
