# Supplementary material for: The effects of caloric restriction on adipose tissue and metabolic health are sex- and age-dependent
Source: eLife journal article supplement (doi:10.7554/elife.88080), 2023-04-18
Supplement: supp [file Figure 7_Source_Data.xlsx]

## Sheet: Figure 7A
Figure 7A - RNAseq data - principal component analysis
Sex	Diet	ID	PC1	PC2	PC3	PC4	PC5	PC6	PC7	PC8	PC9	PC10	PC11	PC12	PC13	PC14	PC15	PC16	PC17	PC18	PC19	PC20	PC21	PC22
Female	CR	175	-1.84314	-20.3171	7.17366	3.1332	6.33318	-2.24755	3.22318	-0.450465	-4.05633	-0.634988	3.18749	-3.03977	1.91843	-6.71349	4.29056	-1.24906	-1.07008	-1.11106	-0.637234	-0.714017	-1.07625	5.2458e-15
Male	AL	181	20.3936	23.132	2.04125	3.96863	2.35801	2.21175	4.20641	4.88538	0.432389	2.55366	-0.803725	-2.25273	-4.05519	-2.28877	-0.845339	-2.14955	1.35097	0.257036	-0.356097	-1.81753	3.82983	4.50681e-15
Male	CR	183	7.83491	-13.751	-9.16641	10.445	-5.23833	-4.65188	-2.3622	3.76909	-3.82824	1.09901	0.461289	1.37332	-2.88234	-1.10637	-3.85412	1.8202	-2.16852	-3.19296	2.90692	-0.853761	-0.835843	1.27676e-14
Female	AL	186	-43.618	33.2619	-3.01909	4.74124	-7.73085	6.87779	3.75579	-6.70561	-7.23245	-0.46853	1.13335	1.15078	0.216543	1.5253	0.380989	-0.743717	-1.0028	0.0820702	-0.0508468	-1.4063	-0.0181024	-9.68409e-15
Female	CR	187	-7.59177	-25.6528	7.1191	-2.18976	1.55567	-7.11674	5.62615	-5.41851	-0.0779632	1.77331	-2.87527	1.31407	-1.22715	2.42164	-0.558648	3.16936	0.216202	-1.91445	-4.06892	-0.952115	1.15608	5.45397e-15
Female	AL	201	-21.3192	12.4724	8.95416	-0.843521	6.97954	-6.47643	-11.316	-6.81752	4.42873	-1.26048	0.965913	-3.62766	-0.334404	0.524297	-0.8176	-0.877898	-2.02926	0.0501715	1.21014	-1.14952	1.16393	6.7793e-15
Male	AL	210	6.60114	32.8663	-4.56982	3.01005	1.23052	-2.71272	3.21674	-0.217624	1.6342	-0.711073	0.333119	-5.83983	-3.09415	1.45111	0.00915574	-0.0990679	0.729011	-1.82582	-1.34077	3.87886	-2.25241	1.84089e-14
Female	CR	213	-5.1014	-30.312	1.91762	6.51706	-5.06589	2.18257	8.03456	-3.70647	6.20516	-5.70375	0.336559	0.850768	-0.794901	-0.0822928	-0.645486	-1.78029	-1.74881	1.36513	2.07051	2.25482	1.20664	-2.48204e-14
Male	CR	268	12.3862	-21.2389	-13.5299	-1.63407	3.58558	15.546	-4.86113	-3.13971	2.94169	4.04283	3.03462	-0.937572	0.457952	0.578038	-0.0572723	0.62562	-0.079948	-2.38112	-1.02659	0.445208	0.403803	9.24261e-15
Female	CR	274	-20.7132	-16.33	-6.42395	1.27262	6.66309	1.1937	2.62596	6.11479	3.33686	-1.06283	-1.39112	-1.35341	-1.15026	4.46476	0.921851	-2.33746	1.02289	0.623162	0.450407	-3.58884	-2.47137	-1.50921e-16
Male	AL	291	17.2731	20.2908	-5.35416	-1.74367	4.03993	-1.35392	2.2587	5.97384	1.0097	-4.27486	5.04742	1.70141	5.08365	1.37696	-2.33977	1.12303	-3.47003	0.672827	-2.327	-0.443088	0.46249	5.64826e-15
Male	AL	296	29.4443	10.5357	4.41754	-7.12155	-0.324792	1.93448	0.627425	-1.65754	-0.132995	2.81217	-9.44326	1.2389	2.84267	-0.413741	-0.0439962	-2.80726	-3.26065	-0.751118	0.500932	0.104119	-1.00418	2.48968e-14
Male	CR	298	12.4385	-17.452	-10.1042	6.07101	-3.93182	-0.695034	-3.93957	-2.58473	-3.29254	1.06031	-1.52581	-3.15545	0.302117	-1.70812	-3.4599	-0.193929	1.05993	5.18387	-2.23141	0.0185939	-1.02651	1.09635e-14
Female	AL	311	-12.7798	3.13427	21.9176	5.66553	1.77489	0.586258	-0.384803	3.67737	1.70989	9.25636	2.69553	3.79939	-1.40011	0.808443	1.09929	1.0159	-1.52979	2.50427	0.235886	1.63358	-0.833201	5.9952e-15
Male	CR	325	-11.5156	11.0567	-22.8445	2.92891	-9.06557	-7.76335	-1.11632	-0.349782	6.16272	3.90883	0.440999	3.51294	3.25909	-1.97625	2.27854	-1.27908	2.29978	-0.631021	-0.275112	-0.072343	0.30361	-8.62505e-15
Male	AL	339	27.2661	10.5947	7.91065	6.16548	-4.33209	2.21057	1.03387	-1.02834	1.73808	-1.35646	-1.6814	-3.28513	2.9339	1.06171	2.8009	5.78595	1.66526	0.847868	2.52323	-1.43538	0.00347205	1.71738e-14
Female	CR	351	-38.0346	7.68588	-8.54384	-1.58822	13.0758	3.25481	-1.22781	3.06772	-0.437536	-3.35871	-5.1607	3.21048	-0.154394	-3.53608	-0.769519	3.07386	1.32217	0.541339	0.544084	1.69378	0.345375	6.8695e-16
Female	AL	609	-7.38631	-2.1559	13.6853	-8.14577	-15.1979	3.43956	-6.93301	5.65575	1.75553	-5.39006	-0.844209	0.824309	-2.91342	-1.64546	1.55017	0.255955	-0.191361	-0.553588	-2.38615	-0.298365	-0.413971	1.40721e-14
Female	AL	610	-1.3224	-5.15176	22.1639	2.77273	0.252233	0.474817	-1.32843	0.84452	-2.21704	-1.02476	1.05162	1.00824	4.6341	1.01612	-3.65519	-2.543	4.7924	-1.96877	0.557507	0.913643	-0.0323617	1.266e-14
Female	CR	613	-18.5933	-12.9511	-5.70618	-23.7907	-4.49674	-2.59195	2.7308	3.27372	-3.28078	3.26213	1.55165	-4.37745	1.05056	1.00668	-0.409334	0.618746	-0.0288859	0.720203	2.23614	1.0752	1.07279	-7.09502e-15
Male	AL	A	34.0871	10.9387	-0.207138	-14.0833	4.00806	-1.17606	1.70713	-6.42778	0.0898019	-1.86833	3.82594	5.40197	-3.75109	-1.28547	-0.499307	0.0210689	1.88789	0.953826	1.22894	-1.11697	-1.59922	2.15938e-14
Male	CR	B	22.0938	-10.6568	-7.83159	4.44902	3.5275	-3.12671	-5.5774	1.24192	-6.88888	-2.65378	-0.340014	2.48243	-0.941607	4.52099	4.62403	-1.44937	0.233625	0.528141	0.235442	1.83042	1.61539	1.07345e-14
Gene	PC1	PC2
Cyp3a41a	-0.167401	-0.0561396
Cyp3a41b	-0.166616	-0.0562307
Amy2a2	-0.145677	0.144584
Amy2a3	-0.145658	0.144579
Amy2a4	-0.145639	0.144574
Amy2a5	-0.145609	0.144532
Cyp4a12a	0.139991	0.103546
Mup7	0.116422	0.13358
Ctrb1	-0.133264	0.121086
Pnlip	-0.126776	0.127495
Cyp4a12b	0.134811	0.105072
Cel	-0.125592	0.128367
Cpa1	-0.123376	0.127088
Amy2a1	-0.125496	0.124862
Cela2a	-0.122342	0.125879
Prss2	-0.118931	0.122906
Try4	-0.121276	0.117666
2210010C04Rik	-0.121292	0.117374
Cpb1	-0.119598	0.118066
Cyp3a44	-0.11772	-0.0279401
Try5	-0.115721	0.110749
Cela3b	-0.113528	0.110471
Mup15	0.0868973	0.118878
Rnase1	-0.111966	0.111971
Clps	-0.112218	0.109037
Elovl3	0.106784	0.10911
Mup20	0.115585	0.0948644
Pnliprp1	-0.107378	0.111365
Cyp2b13	-0.124727	-0.0565907
Hsd3b5	0.117916	0.0821748
Cyp2b9	-0.10134	-0.0888362
Fmo3	-0.107857	-0.0866478
Ctrl	-0.104928	0.0971239
Sycn	-0.101266	0.0982626
Cyp3a16	-0.0944119	-0.0383975
Mup17	0.0529123	0.109379
Sult2a2	-0.0977505	-0.0508108
Sult2a1	-0.0942779	-0.0516965
Zg16	-0.0977305	0.0955087
Slc22a26	-0.106014	-0.0647473
Sult3a1	-0.094084	-0.0494043
Cyp2a4	-0.104148	-0.0753437
Reg1	-0.100245	0.0808926
Cpa2	-0.0952623	0.0901943
Klk1	-0.0857534	0.0832205
Mup12	0.0618416	0.0889557
A1bg	-0.0833972	-0.0243993
Cyp2c69	-0.0837374	-0.0343477
Amy2b	-0.0828439	0.0800333
Gp2	-0.0811157	0.0799142
Pnliprp2	-0.0810762	0.0788785
Mup1	0.0558425	0.0840804
Mup21	0.0756864	0.083052
Pla2g1b	-0.0772961	0.077189
Acta1	-0.0156342	0.0329966
Cela1	-0.0642174	0.089162
Mup19	0.0517599	0.0793298
Slco1a1	0.0709599	0.0769864
Mup8	0.0526166	0.079991
Dmbt1	-0.0543238	0.0437179
Cyp2d9	0.0819199	0.0479864
Mup9	0.0501553	0.0774099
Krt13	-0.00306967	0.0203597
Sult2a5	-0.0680933	-0.0405941
Elovl6	-0.0237672	-0.0809827
Slc22a27	-0.0727891	-0.0690992
Krt4	-0.00427882	0.0173684
Dbp	-0.00633235	-0.0357761
Cux2	-0.0675077	-0.0608082
Cdkn1a	-0.0041074	0.0543491
Pdia2	-0.0680182	0.0623405
Tnnt3	-0.0130686	0.0255516
Tff2	-0.0568155	0.0591791
Mup11	0.043279	0.0712165
Cuzd1	-0.0609212	0.0570336
Gm3734	0.0302544	0.0726909
Ppp1r3g	-0.0160739	-0.0716681
Mt2	-0.0452286	0.0266767
Mb	-0.0148958	0.0206482
Mup14	0.0391159	0.0702796
Fasn	-0.0189346	-0.0644116
Myh1	-0.0164628	0.018872
Cyp2c40	-0.064118	-0.0357434
Ckm	-0.0114286	0.0231744
Chrna4	-0.0202462	-0.072372
Ins2	-0.056889	0.0474927
Serpina4-ps1	0.0413247	0.0469958
Thrsp	-0.0220515	-0.0547389
Atp2a1	-0.0106807	0.0196086
Bhmt	0.0222047	0.0496879
Mup16	0.0352211	0.0630974
Sult2a3	-0.0488666	-0.0369762
Lepr	-0.0530056	-0.0497835
Per3	-0.0188002	-0.0513257
Pcsk9	-0.0125412	-0.0639222
Hao2	-0.0618181	-0.04131
Myh2	-0.0120976	0.0102752
Cyp7b1	0.0636578	0.0456115
Try10	-0.0536368	0.0513334
Hamp2	-0.0525741	-0.0522037
Pnpla3	-0.0228418	-0.0433407
Prss3	-0.0525748	0.0489431
Wee1	-0.0126938	-0.0532088
Mup13	0.0291622	0.0614063
Gadd45g	-0.02117	0.0167101
Cyp2a22	-0.0595152	-0.0287969
Acot3	-0.0356335	-0.0631884
Mup18	0.0301029	0.0599106
Cyp8b1	0.0168476	0.0410639
Mup2	0.0284736	0.0609731
Fmo2	-0.0486778	-0.0553388
Pitx3	0.0437189	0.0506971
Susd4	0.0579385	0.0419026
C6	0.05368	0.0464973
Cyp17a1	-0.0518139	-0.045405
Tnnc2	-0.0127424	0.0172871
Serpina12	0.0503068	0.0423873
Fabp5	-0.0209403	-0.0579854
Mup10	0.0263586	0.0581489
Gstp1	0.0529398	0.0378723
Moxd1	0.034379	0.0278143
Gm40794	-0.0461703	-0.0431785
Sult2a6	-0.0459386	-0.0344812
Gm21320	0.0266532	0.0577935
Gstp2	0.0519316	0.0380077
Myl1	-0.0122112	0.0130785
Pdk4	-0.0229245	-0.043318
Idi1	-0.00955382	-0.063301
Gm38481	-0.00878239	-0.0625197
Gm3934	0.0505271	0.0379749
Acly	-0.0113887	-0.0458755
Per2	-0.0124579	-0.0459676
Slc16a5	-0.0488391	-0.043042
Ppp1r3c	0.0216882	0.0517037
C8a	0.0395762	0.0506614
Sult3a2	-0.0397888	-0.0206878
Serpini2	-0.0469194	0.0430492
Mt1	-0.0382429	0.0189084
Rad51b	-0.0476082	-0.0335094
Ins1	-0.0446341	0.0385763
Aacs	-0.0242389	-0.0259876
Gm31583	0.0404033	0.0423427
Usp2	-0.0178802	-0.0384358
Acaca	-0.0119207	-0.0537947
Cela3a	-0.0443366	0.0409168
Ckmt2	-0.00591083	0.0159383
Nt5e	-0.0469795	-0.015754
Tnni2	-0.00881872	0.0135051
Arntl	0.00958434	0.0340718
Cyp2c54	0.0297294	0.0436065
Gm4956	0.0503693	0.0252309
Gm30959	0.0150731	0.0435562
Cyp2b10	-0.0416357	-0.016799
Nipal1	-0.0397196	-0.040427
Npas2	0.00971136	0.0358101
Gm13773	0.0342176	0.0399697
Gm35696	0.040644	0.00616808
Nupr1	-0.0463261	0.0286352
Alas2	0.0474886	0.0308455
Krtdap	-0.00189132	0.0116893
Ttn	-0.014325	0.00491186
Ccnd1	-0.0489769	-0.0193137
Tff3	0.0451109	0.0313814
Fdps	-4.49179e-05	-0.0517509
Ciart	-0.0236316	-0.0217234
Sqle	-0.0148227	-0.0473373
Klk1b5	-0.0432033	0.0322702
Clec2h	0.0338075	0.0382374
Reg2	-0.0405897	0.024653
Cyp2d12	0.0474383	0.0292742
9030619P08Rik	-0.0417308	-0.0292017
Mup-ps8	0.0237933	0.034219
Myh4	0.0020296	0.0139305
Ugt1a5	-0.0264869	-0.0519596
Cyp2a5	-0.0255009	-0.0396329
Zbtb16	-0.0287185	-0.00272399
Mup-ps16	-0.0228675	-6.224e-05
Slc2a4	-0.014353	-0.037068
Fam19a2	-0.0398106	-0.0302174
Nox4	0.0392908	0.0301675
Ntrk2	-0.0425591	-0.0189525
Aqp12	-0.0390661	0.037375
Marco	-0.0126954	0.0164732
Selenbp2	0.036749	0.0307511
Nat8f5	0.0447504	0.012738
Cyp2u1	0.0434766	0.0313392
Gm10334	-0.0394953	0.035443
Reg3d	-0.0413004	0.0304789
Ddit4	-0.0119632	0.0137156
Serpine2	0.0403474	0.0338939
Abcb1a	-0.0224298	-0.0472618
Spon2	0.0169933	0.0463955
Igfbp1	-0.0122954	-0.020373
Cish	-0.0300782	-0.00142376
Spink1	-0.0332505	0.0367033
Mybpc1	-0.0120499	0.00805007
Insig2	0.0141332	0.0354348
Fabp3	-1.78737e-05	0.00885118
Eef1a2	-0.00798846	0.0121164
Slc22a7	0.0306651	0.0409542
Nat8	0.0433617	0.0228926
Ces3a	0.0305125	0.0457514
Tmed6	-0.0364348	0.0346238
Tcap	-0.0141013	0.00728104
H19	-0.0276637	-0.00184793
Cyp2c39	-0.0379485	-0.0346255
Srebf1	-0.00611675	-0.0188468
Hcn3	0.00341159	-0.0271696
Cyp2c38	-0.0352169	-0.034119
Gm36227	0.00359938	0.0435839
Nrg4	-0.025456	-0.0420497
Cox6a2	-0.00675166	0.0089008
Cckar	-0.0341886	0.0329058
Gstm3	-0.0119572	-0.0276596
Adra2a	-0.0236892	-0.0116457
C8b	0.0326046	0.0386496
Gm11695	-0.040042	-0.0261442
LOC108167326	0.000770373	0.0391831
Capn11	-0.0130189	-0.00702706
Cd99	0.0271298	-0.0190456
Dlec1	-0.00245712	-0.0490732
Ldb3	-0.0114357	0.00935259
C330002G04Rik	0.0363232	0.0361117
Sult5a1	0.0277946	0.0396598
Mylpf	-0.00755414	0.00174914
Col5a3	0.0392189	0.029748
Hmgcr	-0.0126418	-0.0410331
Socs2	-0.0234712	-0.0115043
Sprr3	-0.00553489	0.00577347
Me1	-0.00469483	-0.0341495
Osgin1	0.012891	-0.024448
Gm42078	0.0163888	0.0306953
Rbpjl	-0.0357824	0.0317572
Acss2	-0.0035315	-0.0395098
Lss	-0.00874012	-0.0428833
G6pdx	-0.0146733	-0.0422549
Vldlr	-0.0376926	-0.0305224
Actn2	-0.00973344	0.00952878
Erp27	-0.0330749	0.0338036
Arrdc3	0.00503004	-0.000230186
Atp6v0d2	-0.0314895	-0.00485842
Acot1	-0.0124634	-0.010209
Myh8	-0.00697771	0.00499328
Mup3	0.0344204	0.0382357
Hsd3b4	0.0391632	0.0286843
Ggt1	-0.034002	0.0301515
Fitm1	0.0329312	0.0227973
Sik1	-0.0043454	-0.0437448
Tcf24	-0.035611	-0.0248653
Txnip	-0.0189099	-0.0364859
Cyp7a1	-0.00931171	-0.0101684
Pnpla5	-0.00597117	-0.0319918
Gm36180	-0.0183404	-0.038408
Cyp26b1	-0.00285933	-0.0134053
Rptn	-0.00642852	0.00555238
Clpx	0.012383	0.0316521
Myot	-0.0116672	0.00852693
Myc	-0.0142986	-7.81004e-05
Ctrc	-0.0326984	0.0302587
Foxq1	-0.0113442	-0.00519852
Mid1ip1	-0.0126106	-0.0246954
Acacb	-0.0106491	-0.0415898
Pcp4l1	-0.032213	-0.0241723
LOC108168162	-0.00371396	0.0354814
Gcg	-0.0332505	0.023558
Eps8l2	0.0185847	0.0381028
Gm36041	0.015783	0.0397053
Tpm2	-0.00922627	0.0119864
Adh6-ps1	0.037216	0.0297013
Serpina1e	0.0278113	0.0293124
Abcd2	-0.0371958	-0.0286773
Egr1	-0.0131233	0.00509294
Rcan2	-0.0339812	-0.0297775
Cyp51	-0.00335168	-0.043408
Mvd	-0.00579697	-0.0346158
Pklr	0.00132443	-0.0284152
Hamp	-0.00727308	0.0151925
Onecut1	-0.0130427	-0.0151993
Gm4952	0.00832987	0.0369683
Scd3	-0.00361652	-0.0357986
Tef	-0.00835922	-0.0269559
Slc15a5	0.0387567	0.0188715
Gm42031	-0.0114206	0.0257197
Nudt7	0.0277216	0.00993987
LOC108168003	0.0142043	0.0148123
Obp2a	0.0335383	0.0289806
Tgm1	-0.0155964	-0.0318077
Pnkd	0.0156665	0.0380559
Gm42052	0.0159038	0.0212785
Bhlha15	-0.0245555	0.0314246
Rab36	0.0134673	0.030752
Mafb	0.000589962	0.0161196
Slc39a5	-0.0373251	-0.0155735
Gm30842	0.0210534	0.0375171
Serpina3k	0.0237195	0.0327658
Trdn	-0.0087716	0.00870325
Derl3	0.00240774	0.0349758
Acnat2	-0.029202	-0.000804725
Nrep	-0.0135398	-0.0149074
Gm42368	-0.020486	0.0181647
Gal	-0.0292253	0.0241389
Gm42035	-0.0210336	0.020362
Aldh3b3	-0.0372834	-0.0113696
Capn8	0.0342017	0.027084
Hsd3b7	0.0127716	0.0395229
Maff	-0.0168789	-0.0290719
Sult2a4	-0.0298732	-0.0205447
Dmkn	-0.00213072	0.00591208
Serpina6	-0.02102	-0.0365181
Odf3b	0.0185219	0.0353288
Fam222a	0.000753859	-0.0011225
Bcl6	0.0256285	0.0047329
Ddc	0.0102467	0.0307346
Cyp2f2	0.0285169	0.0357109
Lrrc16a	0.0331298	0.0212746
Ak4	-3.84269e-05	-0.0353053
Dsg1c	0.0113115	-0.0147536
Arsa	0.0337537	0.0238531
Gm32643	0.014541	0.0395265
Acot2	-0.0139922	-0.021187
Slco1a4	-0.0307854	-0.0291942
Adam11	0.00999176	0.0362144
Chka	0.0121236	0.0250943
Slc45a3	0.00752673	0.0248784
Ces2c	0.016593	0.00662734
Ugt2b37	-0.0275628	-0.00433528
LOC108169043	0.0162685	0.0156625
Nlrp12	0.0043131	0.0277199
Lad1	0.0192015	0.0372751
D130043K22Rik	-0.00119415	-0.037218
Asprv1	-0.00397584	0.00800385
G0s2	-0.00410192	-0.0312141
3930402G23Rik	-0.00851688	0.017355
Slc30a10	0.0123629	0.0300892
LOC108167434	0.0118282	0.0134726
Pvalb	-0.00766036	0.00753632
Glycam1	-0.0140689	0.00302435
1810053B23Rik	-0.0326582	-0.0246207
Rnf186	-0.000331307	-0.0218603
Gm41885	-0.000339657	0.0237836
Scd1	-0.00406481	-0.0346006
Enho	0.00196787	0.0173904
LOC108167918	0.011787	0.0118008
Upp2	-0.0251352	-0.0210488
Gm40498	0.00143915	0.0244116
Cd36	-0.0334324	-0.0163685
Car3	0.0168075	0.0347331
1500017E21Rik	0.00981282	0.0404672
Stard4	-0.00449455	-0.0338437
LOC108169093	-0.00326942	0.0234727
Myl2	-0.0059124	0.00467715
Mug1	0.0268911	0.0330834
Srgap3	0.00966752	0.0233255
Aox3	0.026792	0.0338101
4931429L15Rik	0.000996453	-0.0341086
Xirp2	-0.014119	0.00388801
Mcm10	0.0289474	0.00852346
Scd4	-0.00540057	-0.0304388
Gm3776	0.00258436	0.000719419
Gm38847	0.0220218	0.0273761
Il1rn	-0.0282494	-0.0171387
Hspa1b	-0.00217298	-0.00939927
Bhlhe41	0.0150037	0.0194587
C730027H18Rik	0.0337873	0.0224884
Gm10804	0.0251666	0.0217466
Insig1	-0.00914462	-0.0326644
Hspa1a	0.0004387	-0.00783742
Omd	0.0331487	0.0257158
Prok1	0.016614	0.0189606
Unc79	-0.0166054	-0.0264666
Rsph4a	-0.03379	-0.0145039
Lama3	0.0298807	0.0265031
Gsta1	0.00503587	-0.000914864
Msmo1	-0.000571135	-0.0258667
Gm22146	-0.0273987	-0.0241064
Hba-a2	0.00756596	0.00123272
4931408D14Rik	0.00195499	-0.0351483
Arhgdig	-0.0278372	0.0258959
Saa1	0.0156977	0.026403
Gm30365	0.0272696	0.024177
Pstpip2	-0.00661079	-0.0333503
Gm40525	-0.000901442	0.0240462
LOC108168721	-0.0210709	-0.00360267
Hba-a1	0.00761561	0.000390814
Xlr3a	-0.0176629	0.00346505
Ifi27l2b	-0.0267077	-0.0231823
Sult2a8	0.0257336	0.0306245
Ihh	0.0218007	0.0331901
Myl3	-0.00714545	0.00246318
Gm39701	-0.0145013	0.0241262
Gm32468	-0.000865232	-0.0213426
Cyp4a14	-0.0118324	0.00472586
Chga	-0.0173589	0.028201
Gm31121	0.0305383	0.026443
Phlda1	-0.00580737	0.0127406
Asap2	0.0108406	0.0260609
Tgm3	-0.00226404	0.00705164
Cspg5	0.0304063	0.0208064
Hspb1	-0.00857086	-0.00774223
Plin4	-0.016421	0.00556932
Mapk15	0.023295	0.0302737
Tsc22d1	0.0192804	0.0282634
Lcn2	-0.0177066	0.012004
Mad2l2	0.0161141	0.0345501
Hes6	0.0109712	-0.0180178
Krt23	-0.0178779	-0.00572309
Rnf145	-0.0108281	-0.0345643
LOC105244195	-0.0145796	0.0216117
Mmd2	-0.0212795	-0.0156336
Cox8b	-0.00255284	0.0117796
Sybu	-0.030067	-0.0237023
LOC108169013	-0.0146374	0.0172177
Srrm4	-0.0140108	0.0124407
Ryr1	-0.00461277	0.00377273
Gm33459	0.0118123	0.00581221
Tspan33	0.0155142	0.0336326
Crot	0.00315146	0.0340253
Gm40991	-0.015832	0.0184884
Ces2d-ps	0.0143414	0.00600548
Gm19950	0.0260937	0.0231524
Gldc	0.0113933	0.0230351
A930033H14Rik	-0.0110229	-0.024887
Gm5409	-0.024311	0.0232726
Akr1c19	0.00163048	-0.0314573
Esr1	-0.0205458	-0.0323206
Hbb-bt	0.00551861	0.000770584
Eci3	-0.0289345	-0.0145085
Rgs16	-0.0213397	-0.0169931
Sdr9c7	0.023007	0.0347265
Tymp	0.0134087	0.0290957
Fam198a	-0.00435545	0.00368073
Gm5771	-0.0250213	0.0235382
Nr0b2	0.0235876	0.00718928
Acsl3	-0.00671587	-0.0354253
Slc22a29	-0.023325	-0.0321658
Cyp26a1	-0.00371416	-0.0287957
Cers6	-0.0276383	-0.0284548
Gm11342	0.0286276	0.0216505
Adck3	0.01807	0.0257155
Nr1d1	0.015326	0.0236699
Cxcl1	0.00535134	-0.0183328
Gm31249	-0.0172199	-0.0241063
Mup-ps12	-0.00521434	0.0123992
Lgals7	0.000228058	0.00633397
Scara5	0.0182608	0.032127
Plk3	-0.00753974	-0.0130447
Ly6d	-0.0226315	0.012014
Gm34490	0.0109983	0.0242071
Gm40514	-0.0167441	0.0187052
C9	0.0234078	0.0329487
Rarres1	0.0182614	0.0264152
Nampt	-0.0126176	-0.0341819
Obscn	-0.010454	0.00106825
Gadd45b	-0.0205258	-0.00863997
Myh7	-0.0039301	0.00174186
Hbb-bs	0.00499029	-3.04446e-05
Dpy19l3	0.0288633	0.0135817
Sprr2a1	0.00826954	0.00942012
A630034I12Rik	-0.00632323	-0.0299271
Sprr2a2	0.0082416	0.00940863
Cacna1s	-0.00840243	0.00736814
Tjp3	0.0187037	0.0315912
S100a10	0.00377575	0.0300947
Atp1a2	-0.00878674	-7.05155e-05
Gm39972	-0.0157813	0.0174441
Gpc1	0.0296793	0.0189861
Mroh6	-0.0122958	-0.0342826
Gdf15	0.00656392	0.00874998
Tsku	0.00267442	-0.0142941
Cmya5	-0.00423067	0.00135452
St3gal6	-0.0281218	-0.0165257
Tox	-0.0317692	-0.0146328
Stx1b	0.00878993	0.0296418
Mtnr1a	0.028042	0.0245526
Hspb7	-0.0109881	0.00509888
Bmf	0.000909986	-0.0219449
Ccnf	0.022405	0.0274977
Trim24	-0.0290022	-0.0240058
Loxl4	-0.00241254	0.0140161
LOC108168067	0.0110581	0.0140328
Serpinb1a	-0.0167117	0.0212527
Dclk3	-0.00656758	-0.0310245
Csrp3	0.00609737	0.032781
Efna1	0.00993379	-0.0247538
Crct1	-0.0022245	0.00834062
Gm37416	0.0145757	0.0122594
Lonrf3	-0.00727052	-0.031262
Sytl5	-0.0249419	-0.0229527
Nsdhl	-0.00279701	-0.0348026
Nmrk1	-0.0119513	-0.030411
Fam107a	-0.00468344	0.0250714
Alas1	-0.0162978	-0.0110061
Mthfd1l	-0.00875321	-0.0325046
Mycl	-0.0169726	-0.0232157
Noct	-0.00982386	-0.0255527
Chac1	-0.00953075	0.0188272
Slc15a2	-0.00775441	0.011735
Dtx4	0.01055	0.0282337
AA986860	-0.0102711	-0.00367228
Abhd2	-0.0220878	-0.0156678

## Sheet: Figure 7C
Figure 7C - GSEA data
	Normalised enrichment score (NES): Female vs Male	Normalised enrichment score (NES): Female vs Male	FDR-q (-log10): Female vs Male	FDR-q (-log10): Female vs Male
Gene set	AL	CR	AL	CR
MM15392_REACTOME_GLUCONEOGENESIS	-0.729826	-1.81226	0.0362413	2.04019
MM3893_HALLMARK_OXIDATIVE_PHOSPHORYLATION	-1.57383	-2.61908	1.44263	4
REACTOME_CITRIC_ACID_CYCLE_TCA_CYCLE	0.685094	-1.742	0.0181758	1.93203
MM3894_HALLMARK_GLYCOLYSIS	0.938117	-1.39438	0.014967	1.08962
MM15462_REACTOME_MITOCHONDRIAL_FATTY_ACID_BETA_OXIDATION	0.787983	-1.02949	0	0.415298
MM15885_WP_FATTY_ACID_BIOSYNTHESIS	-0.998544	-1.31429	0.182573	0.997846
MM3872_HALLMARK_ESTROGEN_RESPONSE_EARLY	1.17227	1.26201	0.326889	0.934555
MM3873_HALLMARK_ESTROGEN_RESPONSE_LATE	1.23246	1.3465	0.177171	0.887168
	Normalised enrichment score (NES): CR vs AL	Normalised enrichment score (NES): CR vs AL	FDR-q (-log10): CR vs AL	FDR-q (-log10): CR vs AL
Gene set	Male	Female	Male	Female
MM15392_REACTOME_GLUCONEOGENESIS	1.86473	1.55039	2.43573	1.65919
MM3893_HALLMARK_OXIDATIVE_PHOSPHORYLATION	1.67902	1.22746	2.11102	0.859091
REACTOME_CITRIC_ACID_CYCLE_TCA_CYCLE	1.82678	1.29214	2.45644	0.980007
MM3894_HALLMARK_GLYCOLYSIS	1.63673	1.43568	2.02148	1.34833
MM15462_REACTOME_MITOCHONDRIAL_FATTY_ACID_BETA_OXIDATION	1.78142	1.78762	2.37679	2.22126
MM15885_WP_FATTY_ACID_BIOSYNTHESIS	2.02026	2.36682	3.24705	4
MM3872_HALLMARK_ESTROGEN_RESPONSE_EARLY	1.3445	1.6506	1.20935	1.92147
MM3873_HALLMARK_ESTROGEN_RESPONSE_LATE	1.57813	1.73829	1.88069	2.15173

## Sheet: Figure 7E
Figure 7E - plasma ketone concentrations (mM)
Week	Female AL	Female AL	Female AL	Female AL	Female AL	Female AL	Female AL	Female AL	Female AL		Female CR	Female CR	Female CR	Female CR	Female CR	Female CR	Female CR				Male AL	Male AL	Male AL	Male AL	Male AL	Male AL	Male AL				Male CR	Male CR	Male CR	Male CR	Male CR	Male CR
0	0.2	0.4	0.5	0.4	0.6	0.7	0.5	0.6	0.2		0.6	0.5	0.5	0.4	0.5	0.5	0.6				0.4	0.4	0.4	0.5	0.4	0.5	0.7				0.3	0.3	0.4	0.5	0.6	0.5
1	0.5	0.5	0.7	0.5	0.7	0.5	0.7	0.5	0.7		0.7	1.5	1.7	1.8	1	1.2	0.9				0.3	0.6	0.3	0.4	0.2	0.5	0.1				0.4	0.8	0.7	1.4	0.6	1.6
2	0.5	0.5	0.4	0.5	0.6	0.4	0.6	0.3	0.5		1	0.9	1.1	1.2	1.2	0.9	1.1				0.2	0.3	0.4	0.4	0.3	0.4	0.4				0.5	1	0.7	0.3	0.6	0.3
3	0.5	0.5	0.6	0.6	0.9	0.4	0.5	0.6	0.7		0.8	1.1	1.4	1.2	1.5	1.2	1.8				0.2	0.3	0.5	0.4	0.3	0.4	0.3				0.4	1	1.1	1.3	1	1.1
4	0.5	0.3	0.4	0.5	0.5	0.3	0.5	0.6	0.4		0.9	1.3	1.6	1.3	0.8	0.8	1				0.4	0.3	0.4	0.4	0.4	0.4	0.3				0.4	0.8	0.9	1.3	0.5	0.7
