# Supplementary material for: The effects of caloric restriction on adipose tissue and metabolic health are sex- and age-dependent
Source: eLife journal article supplement (doi:10.7554/elife.88080), 2023-04-18
Supplement: supp [file Figure 8-figure supplement 1_Source_Data.xlsx]

## Sheet: Fig 8-fig supp 1
Figure 8-figure supplement 1A-C: tissue masses (absolute and % body mass) for aged mice
	Group	M AL Old	M AL Old	M AL Old	M AL Old	M AL Old	M AL Old	M AL Old	M AL Old	M AL Old	M AL Old	M CR Old	M CR Old	M CR Old	M CR Old	M CR Old	M CR Old	M CR Old	M CR Old	M CR Old	M CR Old	F AL Old	F AL Old	F AL Old	F AL Old	F AL Old	F AL Old	F AL Old	F AL Old	F AL Old	F AL Old	F AL Old	F AL Old	F AL Old	F AL Old	F CR Old	F CR Old	F CR Old	F CR Old	F CR Old	F CR Old	F CR Old	F CR Old	F CR Old	F CR Old	F CR Old	F CR Old	F CR Old	F CR Old
Figure	Mouse ID	34/ 2488	64/ 3152	65/ 3153	70/ 3166	72/ 3232	74/ 3235	79/ 3425	80/ 3427	91/ 3738	average	33/ 2487	66/ 3154	67/ 3155	68/ 3164	69/ 3165	71/ 3167	73/ 3234	77/ 3423	78/ 3424	95/ 3748	17/ 2217	18/ 2218	20/ 2220	75/ 3237	82/ 3429	83/ 3563	85/ 3565	87/ 3567	88/ 3627	92/ 3744	99/ 3758	100/ 3760	101/ 3761	average	16/ 2216	19/ 2219	21/ 2221	76/ 3238	81/ 3428	84/ 3564	86/ 3586	89/ 3628	90/ 3630	93/ 3745	94/ 3746	96/ 3755	97/ 3756	98/ 3757
Body mass (for calculations for Fig 8D and S9B-C)	Body mass	37.3	36.4	42.4	41.4	36.1	41	30.8	41.8	39.4	38.5111	24.4	37.8	38.3	28.3	27.1	37	25.9	25.6	32.5	28	38.6	39.6	28.4	not recorded	37.7	27.87	29.72	30.31	26.85	34.4	26	23.2	27.9	30.8792	30.3	21.1	21.3	22.3	22.1	22.76	21.8	21.65	22.7	26	25.9	24.1	22.1	25.2
Figure 8-figure supplement 1A: Tissue masses (g)	gWAT	1.269	1.331	1.835	2.35	0.863	2.366	0.259	2.185	1.345	1.53367	0.104	1.04	1.326	0.598	not recorded	0.315	0.271	0.42	0.677	0.323	1.007	1.121	1.686	not recorded	1.638	0.845	1.167	1.167	0.459	1.304	not recorded	0.184	0.465	1.00391	not recorded	0.206	0.126	0.263	0.037	0.415	0.273	0.216	0.415	not recorded	0.505	0.36	0.117	0.339
Figure 8-figure supplement 1A: Tissue masses (g)	iWAT	0.427	1.689	1.793	1.366	0.515	1.307	0.233	1.798	0.746	1.09711	0.109	1.114	1.233	0.31	0.295	0.934	0.288	0.263	0.487	0.224	1.077	0.997	1.404	not recorded	1.301	0.565	0.816	0.778	0.406	0.653	0.324	0.228	0.393	0.745167	not recorded	0.256	0.205	0.217	0.228	0.342	0.25	0.284	0.404	0.29	0.404	0.473	0.36	0.325
Figure 8-figure supplement 1A: Tissue masses (g)	mWAT	0.23	0.413	0.333	0.455	0.088	0.37	0.074	0.344	0.328	0.292778	0.039	0.236	0.799	0.199	0.123	0.25	not recorded	0.181	0.17	0.167	0.564	0.276	0.552	not recorded	0.43	0.347	0.269	0.277	0.147	0.203	0.086	0.244	0.25	0.30375	0.265	0.079	0.129	0.259	0.123	0.129	0.114	0.115	0.191	0.055	0.227	0.157	0.137	0.052
Figure 8-figure supplement 1A: Tissue masses (g)	pWAT	0.598	0.342	0.675	0.526	0.183	0.555	0.098	0.555	0.544	0.452889	0.048	0.383	0.467	0.123	0.086	0.425	0.105	0.08	0.271	0.091	0.553	not recorded	0.582	not recorded	0.864	0.281	0.52	0.471	0.19	0.597	0.129	0.128	0.365	0.425455	0.485	0.139	0.087	0.143	0.104	0.182	0.13	0.072	0.148	0.145	0.214	0.224	0.118	0.13
Figure 8-figure supplement 1A: Tissue masses (g)	pcWAT	0.02	not recorded	not recorded	0.028	0.014	0.021	0.005	0.06	0.047	0.0278571	0.008	0.066	0.018	0.024	0.014	0.038	0.009	0.009	0.027	0.008	0.068	0.049	0.062	not recorded	0.127	0.015	0.039	0.054	0.038	0.046	0.016	0.012	0.036	0.0468333	0.065	0.032	0.012	0.019	0.019	0.02	0.009	0.028	not recorded	not recorded	0.012	0.034	0.019	0.015
Figure 8-figure supplement 1A: Tissue masses (g)	BAT	0.15	0.246	0.165	0.13	0.12	0.146	0.111	0.129	0.113	0.145556	0.051	0.162	0.168	0.085	0.07	0.114	0.079	0.107	0.103	0.072	0.114	0.109	0.166	not recorded	0.147	0.099	0.134	0.149	0.099	0.109	0.067	0.071	0.059	0.11025	0.119	0.049	0.074	0.269	0.068	0.071	0.081	0.084	0.087	0.059	0.063	0.071	0.062	0.069
Figure 8-figure supplement 1B: Tissue masses (g)	Liver	1.624	1.477	1.629	1.687	1.477	1.759	not recorded	1.451	1.526	1.57875	0.973	1.11	1.202	0.601	0.874	1.079	0.875	0.595	1.066	0.847	1.981	1.704	2.568	not recorded	1.597	1.417	1.574	2.007	1.717	1.57	1.198	1.155	1.53	1.66817	0.997	0.982	0.86	1.122	0.853	0.818	0.862	0.58	0.934	1.023	0.851	0.901	0.397	0.806
Figure 8-figure supplement 1B: Tissue masses (g)	Pancreas	0.21	0.165	0.16	0.168	0.209	0.203	0.124	0.166	0.156	0.173444	0.197	0.192	0.139	0.237	0.169	0.162	0.193	0.19	0.183	0.148	0.335	0.239	0.176	not recorded	0.211	0.19	0.151	0.181	0.215	0.184	0.183	0.151	0.141	0.196417	0.123	0.152	0.203	0.138	0.194	0.136	0.151	0.233	0.155	0.162	0.139	0.154	0.127	0.132
Figure 8-figure supplement 1B: Tissue masses (g)	Kidney (x2)	0.494	0.415	0.445	0.468	0.532	0.441	0.455	0.437	0.465	0.461333	0.344	0.414	0.397	0.452	0.356	0.38	0.382	0.403	0.386	0.391	0.374	not recorded	0.419	not recorded	0.366	0.322	0.331	0.363	0.357	0.358	0.362	0.325	0.39	0.360636	0.326	0.296	0.307	0.275	0.308	0.292	0.272	0.307	0.265	0.324	0.275	0.301	0.286	0.328
Figure 8-figure supplement 1B: Tissue masses (g)	Gastroc	0.271	0.317	0.29	0.328	0.318	0.323	0.269	0.409	0.399	0.324889	0.114	0.436	0.377	0.299	0.28	0.292	0.271	0.316	0.333	0.314	0.237	0.259	0.246	not recorded	0.461	0.278	0.312	0.306	0.269	0.31	0.266	0.245	0.235	0.285333	0.25	0.233	0.204	0.212	0.228	0.243	0.241	0.207	0.228	0.196	0.096	0.228	0.203	0.238
Figure 8-figure supplement 1B: Tissue masses (g)	Heart	0.191	0.147	0.156	0.172	0.171	0.154	0.195	0.188	0.154	0.169778	0.183	0.152	0.142	0.162	0.143	0.147	0.148	0.168	0.161	0.152	0.152	0.19	0.164	not recorded	0.144	0.141	0.137	0.118	0.139	0.14	0.125	0.15	0.155	0.14625	0.124	0.103	0.126	0.111	0.124	0.111	0.119	0.125	0.119	0.135	0.117	0.114	0.121	0.115
Figure 8-figure supplement 1B: Tissue masses (g)	Spleen	0.084	0.063	0.06	0.068	0.11	0.121	0.064	0.068	0.057	0.0772222	0.038	0.053	0.047	0.067	0.047	0.054	0.056	0.059	0.049	0.05	0.132	0.093	0.534	not recorded	0.1	0.079	0.117	0.185	0.159	0.119	0.075	0.072	0.206	0.155917	0.056	0.065	0.057	0.064	not recorded	0.048	0.05	0.06	0.061	0.159	0.058	0.062	0.038	0.045
Figure 8-figure supplement 1B: Tissue masses (g)	Thymus	0.056	not recorded	not recorded	0.059	0.04	0.08	0.07	0.066	0.08	0.0644286	0.042	0.058	0.049	0.031	0.023	0.06	0.059	0.035	0.042	not recorded	0.056	0.089	0.081	not recorded	0.072	0.048	0.076	0.096	0.07	0.085	0.028	0.049	0.06	0.0675	0.047	not recorded	0.035	0.045	0.033	0.035	0.063	0.023	0.025	0.023		0.044	0.035	0.028
Figure 8-figure supplement 1B: Tissue masses (g)	Adrenal Glands (x2)	0.007	0.007	0.006	0.009	0.007	0.007	not recorded	0.006	0.008	0.007125	0.006	0.005	0.006	0.006	0.009	0.008	0.008	0.007	0.009	0.009	0.019	0.012	0.013	not recorded	0.015	0.01	0.013	0.013	0.012	0.019	0.009	0.006	0.011	0.0126667	0.011	0.009	0.013	0.009	0.013	0.008	0.014	0.014	0.01	0.018	0.014	0.011	0.011	0.012
Figure 8-figure supplement 1C: Tissue masses (% body mass)	Liver	4.35389	4.05769	3.84198	4.07488	4.09141	4.29024	not recorded	3.47129	3.8731	4.00681	3.9877	2.93651	3.13838	2.12367	3.22509	2.91622	3.37838	2.32422	3.28	3.025	5.13212	4.30303	9.04225	not recorded	4.23607	5.08432	5.2961	6.62158	6.39479	4.56395	4.60769	4.97845	5.48387	5.47869	3.29043	4.65403	4.03756	5.03139	3.85973	3.59402	3.95413	2.67898	4.11454	3.93462	3.28571	3.73859	1.79638	3.19841
Figure 8-figure supplement 1C: Tissue masses (% body mass)	Pancreas	0.563003	0.453297	0.377358	0.405797	0.578947	0.495122	0.402597	0.397129	0.395939	0.452132	0.807377	0.507937	0.362924	0.837456	0.623616	0.437838	0.745174	0.742188	0.563077	0.528571	0.867876	0.603535	0.619718	not recorded	0.559682	0.681737	0.508075	0.597163	0.800745	0.534884	0.703846	0.650862	0.505376	0.636125	0.405941	0.720379	0.953052	0.618834	0.877828	0.59754	0.692661	1.07621	0.682819	0.623077	0.53668	0.639004	0.574661	0.52381
Figure 8-figure supplement 1C: Tissue masses (% body mass)	Kidney (x2)	1.3244	1.14011	1.04953	1.13043	1.47368	1.07561	1.47727	1.04545	1.1802	1.21074	1.40984	1.09524	1.03655	1.59717	1.31365	1.02703	1.4749	1.57422	1.18769	1.39643	0.968912	not recorded	1.47535	not recorded	0.970822	1.15536	1.11373	1.19762	1.32961	1.0407	1.39231	1.40086	1.39785	1.2221	1.07591	1.40284	1.44131	1.23318	1.39367	1.28295	1.24771	1.41801	1.1674	1.24615	1.06178	1.24896	1.29412	1.30159
Figure 8-figure supplement 1C: Tissue masses (% body mass)	Gastroc	0.726542	0.870879	0.683962	0.792271	0.880886	0.787805	0.873377	0.978469	1.01269	0.845209	0.467213	1.15344	0.984334	1.05654	1.03321	0.789189	1.04633	1.23437	1.02462	1.12143	0.61399	0.65404	0.866197	not recorded	1.22281	0.997488	1.0498	1.00957	1.00186	0.901163	1.02308	1.05603	0.842294	0.936527	0.825083	1.10427	0.957746	0.950673	1.03167	1.06766	1.1055	0.95612	1.00441	0.753846	0.370656	0.946058	0.918552	0.944444
Figure 8-figure supplement 1C: Tissue masses (% body mass)	Heart	0.512064	0.403846	0.367925	0.415459	0.473684	0.37561	0.633117	0.449761	0.390863	0.446925	0.75	0.402116	0.370757	0.572438	0.527675	0.397297	0.571429	0.65625	0.495385	0.542857	0.393782	0.479798	0.577465	not recorded	0.381963	0.50592	0.460969	0.38931	0.517691	0.406977	0.480769	0.646552	0.555556	0.483063	0.409241	0.488152	0.591549	0.497758	0.561086	0.487698	0.545872	0.577367	0.524229	0.519231	0.451737	0.473029	0.547511	0.456349
Figure 8-figure supplement 1C: Tissue masses (% body mass)	Spleen	0.225201	0.173077	0.141509	0.164251	0.304709	0.295122	0.207792	0.162679	0.14467	0.202112	0.155738	0.140212	0.122715	0.236749	0.173432	0.145946	0.216216	0.230469	0.150769	0.178571	0.341969	0.234848	1.88028	not recorded	0.265252	0.283459	0.393674	0.61036	0.592179	0.34593	0.288462	0.310345	0.738351	0.523759	0.184818	0.308057	0.267606	0.286996	not recorded	0.210896	0.229358	0.277136	0.268722	0.611538	0.223938	0.257261	0.171946	0.178571
Figure 8-figure supplement 1C: Tissue masses (% body mass)	Thymus	0.150134	not recorded	not recorded	0.142512	0.110803	0.195122	0.227273	0.157895	0.203046	0.169541	0.172131	0.153439	0.127937	0.109541	0.0848708	0.162162	0.227799	0.136719	0.129231	not recorded	0.145078	0.224747	0.285211	not recorded	0.190981	0.172228	0.25572	0.316727	0.260708	0.247093	0.107692	0.211207	0.215054	0.219371	0.155116	not recorded	0.164319	0.201794	0.149321	0.153779	0.288991	0.106236	0.110132	0.0884615	0	0.182573	0.158371	0.111111
Figure 8-figure supplement 1C: Tissue masses (% body mass)	Adrenal Glands (x2)	0.0187668	0.0192308	0.0141509	0.0217391	0.0193906	0.0170732	not recorded	0.0143541	0.0203046	0.0181262	0.0245902	0.0132275	0.0156658	0.0212014	0.0332103	0.0216216	0.030888	0.0273437	0.0276923	0.0321429	0.0492228	0.030303	0.0457746	not recorded	0.0397878	0.0358809	0.0437416	0.0428901	0.0446927	0.0552326	0.0346154	0.0258621	0.0394265	0.0406192	0.0363036	0.042654	0.0610329	0.0403587	0.0588235	0.0351494	0.0642202	0.0646651	0.0440529	0.0692308	0.0540541	0.0456432	0.0497738	0.047619
