# Supplementary material for: The effects of caloric restriction on adipose tissue and metabolic health are sex- and age-dependent
Source: eLife journal article supplement (doi:10.7554/elife.88080), 2023-04-18
Supplement: supp [file Figure 8_Source_Data.xlsx]

## Sheet: Figures 8A-D
Figures 8A-D: Body mass, fat mass and lean mass, and tissue masses (absolute and % body mass) for aged mice
	Group	M AL Old	M AL Old	M AL Old	M AL Old	M AL Old	M AL Old	M AL Old	M AL Old	M AL Old	M AL Old	M CR Old	M CR Old	M CR Old	M CR Old	M CR Old	M CR Old	M CR Old	M CR Old	M CR Old	M CR Old	F AL Old	F AL Old	F AL Old	F AL Old	F AL Old	F AL Old	F AL Old	F AL Old	F AL Old	F AL Old	F AL Old	F AL Old	F AL Old	F AL Old	F CR Old	F CR Old	F CR Old	F CR Old	F CR Old	F CR Old	F CR Old	F CR Old	F CR Old	F CR Old	F CR Old	F CR Old	F CR Old	F CR Old
Figure	Mouse ID	34/ 2488	64/ 3152	65/ 3153	70/ 3166	72/ 3232	74/ 3235	79/ 3425	80/ 3427	91/ 3738	average	33/ 2487	66/ 3154	67/ 3155	68/ 3164	69/ 3165	71/ 3167	73/ 3234	77/ 3423	78/ 3424	95/ 3748	17/ 2217	18/ 2218	20/ 2220	75/ 3237	82/ 3429	83/ 3563	85/ 3565	87/ 3567	88/ 3627	92/ 3744	99/ 3758	100/ 3760	101/ 3761	average	16/ 2216	19/ 2219	21/ 2221	76/ 3238	81/ 3428	84/ 3564	86/ 3586	89/ 3628	90/ 3630	93/ 3745	94/ 3746	96/ 3755	97/ 3756	98/ 3757
Fig.8A: Body mass (g)	Week 0	37.86	41.24	46.79	44	43.7	43.1	37.3	45.3	38.3	41.9544	36.37	45.22	42.08	37.6	40	44.7	37.5	30.3	45.1	40.8	36.8	34	39.79	32.5	37.6	26.5	30.9	28.8	34.2	32.7	25.8	24.9	28.2	31.7454	39.9	26.1	35.27	25.1	27.4	29.5	27.5	26.3	31.6	36.5	32.5	27.1	24.8	35.6
Fig.8A: Body mass (g)	Week 1	37.8	38.1	46.5	44.9	44.3	44	37.4	45.3		42.2875	32.1	44.8	41.5	32.3	36.6	41.5	33.9	29.3	40.5	not recorded	38.6	36.5	40.5	34.6	40.6	27.9	30	31.2	34.4	not recorded	not recorded	not recorded	not recorded	34.9222	37.3	22.6	31.4	22.1	25.2	26.1	23.8	23.4	28.4	not recorded	not recorded	not recorded	not recorded	not recorded
Fig.8A: Body mass (g)	Week 2	38.9	34.9	45.7	45.1	43	43.1	38	46.1	38.6	41.4889	29.5	42.8	41.1	28	31.7	39.4	30.8	27.2	38	32.6	36.37	35.4	38.95	32.6	38.4	29.6	29.9	30.8	37.7	34.5	26.4	24.6	29	32.6323	34.38	20.36	27.5	not recorded	22.8	24.4	21.8	22	26	28	25.7	21.7	20.2	27.5
Fig.8A: Body mass (g)	Week 3	38	36	46.1	44.9	39.2	43.3	34.6	45.1	39.2	40.7111	27.4	41.7	39.9	27.2	29.6	38.7	29.1	24.9	35.1	30.7	36.7	37.1	39.4	not recorded	39.6	not recorded	not recorded	not recorded	not recorded	34	26.2	25.3	27.3	33.2	33.2	19.8	25	18.7	20.3	not recorded	not recorded	not recorded	not recorded	26.1	24.6	21	19.8	25.7
Fig.8A: Body mass (g)	Week 4	37	37.6	45.9	44.5	37.6	43.2	33.5	44.6	39.4	40.3667	27.6	41.2	40.9	28.9	29.2	39.6	29.4	25.5	34.8	30.7	37.4	37.6	40	not recorded	38.8	28.6	30.2	30.9	32.9	33.8	25.8	23.2	27.9	32.2583	33.6	20.9	25.4	21.8	21.6	24.3	21.5	21.8	24.9	28	25.1	22	21	25.7
Fig.8A: Body mass (g)	Week 5	not recorded	not recorded	not recorded	41.4	36.1	41	30.7	43.2	39.1	38.5833	not recorded	not recorded	not recorded	28.3	27.1	37	25.9	23.5	32.7	27.9	37.8	39.3	39.2	not recorded	37.1	28.3	30.5	31.5	30.6	34.5	26.1	24.1	28.1	32.2583	31.9	20.9	23.1	22.3	21.7	22.6	21.5	21.6	23	24.8	24.6	22.7	21.1	24.4
Fig.8A: Body mass (g)	Week 6	37.3	36.4	42.4	not recorded	not recorded	not recorded	30.8	41.8	38.3	37.8333	24.4	37.8	38.3	not recorded	not recorded	not recorded	not recorded	25.6	32.5	28	38.5		38	not recorded	37.7	28.3	30.3	30.8	27.7	33.3	25.8	23.9	28.3	31.1455	30.7	20.7	21.9	not recorded	22.1	23.4	22.1	22.1	23	24.7	24.9	23.2	21.3	23.8
Fig.8B: Fat mass (g)	Week 0	7.374	19.34	21.046	16.079	13.363	15.977	6.584	18.415	9.064	14.138	7.031	19.628	18.008	6.241	12.016	17.382	8.587	3.689	13.129	9.075	11.02	5.393	16.842	4.175	13.373	3.987	8.536	6.076	11.58	7.408	2.302	2.549	2.994	7.40269	18.418	4.96	11.384	2.83	4.856	6.388	4.024	2.581	8.282	11.383	7.402	4.504	3.182	9.52
Fig.8B: Fat mass (g)	Week 1	not recorded	17.824	20.544	16.283	13.655	16.606	6.517	18.557	not recorded	15.7123	not recorded	17.943	14.918	4.861	9.242	7.315	7.816	4.187	11.49	not recorded	not recorded	not recorded	not recorded	5.034	15.72	4.712	8.146	7.215	10.774	not recorded	not recorded	not recorded	not recorded	8.60017	not recorded	not recorded	not recorded	1.81	3.623	4.767	1.981	2.018	6.046	not recorded	not recorded	not recorded	not recorded	not recorded
Fig.8B: Fat mass (g)	Week 2	8.036	14.264	20.072	17.48	13.217	16.625	0.33	19.628	9.826	13.2753	2.895	17.129	16.041	2.968	4.489	13.919	4.976	3.677	9.372	4.792	10.152	9.889	16.301	3.078	13.445	7.305	7.977	8.54	10.676	9.75	2.374	3.23	3.962	8.20608	14.712	1.54	5.461	0.079	1.404	3.817	1.093	1.353	4.789	6.007	3.334	2.935	1.331	4.714
Fig.8B: Fat mass (g)	Week 3	not recorded	10.131	19.882	16.946	8.963	17.006	5.062	19.195	10.081	13.4083	not recorded	14.64	15.117	2.549	2.867	14.084	2.945	1.754	6.955	3.764	not recorded	not recorded	not recorded	not recorded	14.984	not recorded	not recorded	not recorded	not recorded	10.158	2.963	3.322	3.282	6.9418	not recorded	not recorded	not recorded	-0.165	0.025	not recorded	not recorded	not recorded	not recorded	4.372	2.894	3.321	1.262	3.456
Fig.8B: Fat mass (g)	Week 4	not recorded	10.669	19.312	17.847	7.471	16.755	4.816	14.564	10.676	12.7637	not recorded	13.515	14.463	4.164	3.49	13.743	3.821	2.181	7.09	3.105	not recorded	not recorded	not recorded	not recorded	15.773	7.48	9.161	10.488	9.903	10.186	3.255	3.111	3.971	8.14756	not recorded	not recorded	not recorded	2.885	1.361	4.229	1.657	2.451	4.216	3.81	3.562	4.178	2.352	3.55
Fig.8B: Fat mass (g)	Week 5	not recorded	13.508	18.856	16.285	5.582	15.674	not recorded	16.716	10.622	13.8919	not recorded	13.904	14.469	4.189	2.828	11.778	1.797	2.633	6.247	2.745	not recorded	not recorded	not recorded	not recorded	14.441	7.355	10.094	10.963	not recorded	10.35	3.293	3.215	4.415	8.01575	not recorded	not recorded	not recorded	3.008	2.117	4.453	2.682	2.858	3.93	3.189	4.713	5.098	3.429	3.398
Fig.8B: Fat mass (g)	Week 6	not recorded	13.918	18.449	15.394	3.987	14.866	2.752	16.167	10.183	11.9645	not recorded	13.031	13.914	3.882	2.758	11.763	1.725	2.447	5.31	2.275	not recorded	not recorded	not recorded	not recorded	15.214	7.148	10.544	10.317	4.329	10.922	3.32	2.88	4.485	7.68433	not recorded	not recorded	not recorded	3.094	2.371	4.167	3.25	3.326	4.049	2.606	4.713	4.745	3.298	2.518
Fig.8C: Lean mass (g)	Week 0	23.141	18.556	20.905	21.12	23.241	20.698	23.408	20.492	20.844	21.3783	23.068	23.379	22.14	23.438	21.12	21.111	21.875	20.272	24.534	23.957	18.467	20.054	18.046	18.651	18.566	17.197	16.886	17.061	17.45	18.977	17.632	16.462	18.675	18.0095	17.222	16.347	18.668	16.263	16.743	17.372	17.813	17.966	18.142	19.205	19.093	16.817	16.272	19.837
Fig.8C: Lean mass (g)	Week 1	not recorded	18.191	21.061	21.378	23.196	20.73	23.407	20.553	not recorded	21.2166	not recorded	21.41	21.546	21.021	20.857	28.589	20.053	13.35	22.836	not recorded	not recorded	not recorded	not recorded	18.267	19.195	17.41	16.83	18.308	18.241	not recorded	not recorded	not recorded	not recorded	18.0418	not recorded	not recorded	not recorded	14.736	16.363	16.067	16.018	15.983	16.835	not recorded	not recorded	not recorded	not recorded	not recorded
Fig.8C: Lean mass (g)	Week 2	22.842	17.865	20.408	20.884	22.651	20.643	23.643	20.069	20.553	21.062	20.268	21.072	19.597	19.1	20.246	19.476	19.418	17.855	22.113	21.271	18.072	17.98	18.338	16.28	18.657	16.722	16.596	17.272	17.658	19.185	18.076	16.013	18.284	17.6256	15.498	14.261	16.896	14.125	15.957	15.401	15.455	15.358	15.705	16.468	16.887	14.081	13.911	17.231
Fig.8C: Lean mass (g)	Week 3	not recorded	18.372	20.393	21.078	22.709	19.897	22.06	19.721	20.842	20.634	not recorded	20.708	19.475	18.673	19.949	13.2	19.738	17.483	21.246	20.299	not recorded	not recorded	not recorded	not recorded	18.646	not recorded	not recorded	not recorded	not recorded	18.496	17.422	16.038	17.863	17.693	not recorded	not recorded	not recorded	13.546	14.91	not recorded	not recorded	not recorded	not recorded	16.329	16.119	13.415	13.878	16.965
Fig.8C: Lean mass (g)	Week 4	not recorded	18.899	20.56	21.129	23.002	19.58	22.101	19.635	20.708	20.7018	not recorded	20.441	19.257	19.038	19.566	19.73	19.51	17.752	21.096	20.752	not recorded	not recorded	not recorded	not recorded	18.128	16.739	16.561	17.075	16.936	18.823	17.716	15.71	19.967	17.5172	not recorded	not recorded	not recorded	14.346	15.544	15.203	15.159	14.772	15.334	17.391	16.345	14.056	14.097	17.011
Fig.8C: Lean mass (g)	Week 5	not recorded	19.368	20.783	19.988	23.69	19.757	not recorded	19.393	20.179	20.4511	not recorded	20.406	19.632	17.675	18.504	18.942	18.236	17.049	20.363	19.048	not recorded	not recorded	not recorded	not recorded	17.445	15.939	15.632	15.905	not recorded	18.54	17.121	15.184	17.475	16.6551	not recorded	not recorded	not recorded	14.284	14.594	13.759	14.234	13.84	14.285	16.195	15.061	13.415	13.31	15.895
Fig.8C: Lean mass (g)	Week 6	not recorded	18.827	20.508	19.65	23.045	19.692	21.13	18.972	20.315	20.2674	not recorded	19.728	19.24	18	18.46	18.985	17.742	17.404	20.458	19.168	not recorded	not recorded	not recorded	not recorded	17.235	16.083	15.425	15.798	17.24	17.655	16.983	15.614	17.517	16.6167	not recorded	not recorded	not recorded	14.331	14.779	14.447	14.054	14.135	14.111	16.869	15.314	13.862	13.37	16.022
Body mass (for calculations for Fig 8D and S9B-C)	Body mass	37.3	36.4	42.4	41.4	36.1	41	30.8	41.8	39.4	38.5111	24.4	37.8	38.3	28.3	27.1	37	25.9	25.6	32.5	28	38.6	39.6	28.4	not recorded	37.7	27.87	29.72	30.31	26.85	34.4	26	23.2	27.9	30.8792	30.3	21.1	21.3	22.3	22.1	22.76	21.8	21.65	22.7	26	25.9	24.1	22.1	25.2
Fig.8D: Tissue masses (% body mass)	gWAT	3.40214	3.65659	4.32783	5.67633	2.39058	5.77073	0.840909	5.22727	3.41371	3.85623	0.42623	2.75132	3.46214	2.11307	not recorded	0.851351	1.04633	1.64062	2.08308	1.15357	2.60881	2.83081	5.93662	not recorded	4.34483	3.03193	3.92665	3.85021	1.7095	3.7907	not recorded	0.793103	1.66667	3.13544	not recorded	0.976303	0.591549	1.17937	0.167421	1.82337	1.25229	0.997691	1.82819	not recorded	1.94981	1.49378	0.529412	1.34524
Fig.8D: Tissue masses (% body mass)	iWAT	1.14477	4.64011	4.22877	3.29952	1.42659	3.1878	0.756494	4.30144	1.8934	2.76432	0.446721	2.94709	3.21932	1.09541	1.08856	2.52432	1.11197	1.02734	1.49846	0.8	2.79016	2.51768	4.94366	not recorded	3.45093	2.02727	2.74563	2.56681	1.5121	1.89826	1.24615	0.982759	1.4086	2.34083	not recorded	1.21327	0.962441	0.973094	1.03167	1.50264	1.14679	1.31178	1.77974	1.11538	1.55985	1.96266	1.62896	1.28968
Fig.8D: Tissue masses (% body mass)	mWAT	0.616622	1.13462	0.785377	1.09903	0.243767	0.902439	0.24026	0.822967	0.832487	0.741952	0.159836	0.624339	2.08616	0.70318	0.453875	0.675676	not recorded	0.707031	0.523077	0.596429	1.46114	0.69697	1.94366	not recorded	1.14058	1.24507	0.905114	0.91389	0.547486	0.590116	0.330769	1.05172	0.896057	0.976882	0.874587	0.374408	0.605634	1.16143	0.556561	0.566784	0.522936	0.531178	0.84141	0.211538	0.876448	0.651452	0.61991	0.206349
Fig.8D: Tissue masses (% body mass)	pWAT	1.60322	0.93956	1.59198	1.27053	0.506925	1.35366	0.318182	1.32775	1.38071	1.14361	0.196721	1.01323	1.21932	0.434629	0.317343	1.14865	0.405405	0.3125	0.833846	0.325	1.43264	not recorded	2.0493	not recorded	2.29178	1.00825	1.74966	1.55394	0.707635	1.73547	0.496154	0.551724	1.30824	1.35316	1.60066	0.658768	0.408451	0.641256	0.470588	0.799649	0.59633	0.332564	0.651982	0.557692	0.826255	0.929461	0.533937	0.515873
Fig.8D: Tissue masses (% body mass)	pcWAT	0.0536193	not recorded	not recorded	0.0676329	0.0387812	0.0512195	0.0162338	0.143541	0.119289	0.0700452	0.0327869	0.174603	0.0469974	0.0848057	0.0516605	0.102703	0.034749	0.0351562	0.0830769	0.0285714	0.176166	0.123737	0.21831	not recorded	0.33687	0.0538213	0.131225	0.178159	0.141527	0.133721	0.0615385	0.0517241	0.129032	0.144653	0.214521	0.151659	0.056338	0.0852018	0.0859729	0.0878735	0.0412844	0.12933	not recorded	not recorded	0.046332	0.141079	0.0859729	0.0595238
Fig.8D: Tissue masses (% body mass)	BAT	0.402145	0.675824	0.389151	0.31401	0.33241	0.356098	0.36039	0.308612	0.286802	0.380605	0.209016	0.428571	0.438642	0.300353	0.258303	0.308108	0.305019	0.417969	0.316923	0.257143	0.295337	0.275253	0.584507	not recorded	0.38992	0.355221	0.450875	0.491587	0.368715	0.31686	0.257692	0.306034	0.21147	0.358623	0.392739	0.232227	0.347418	1.20628	0.307692	0.311951	0.37156	0.387991	0.38326	0.226923	0.243243	0.294606	0.280543	0.27381
Absolute adipose masses for calculations for Fig. 8D
Figure 8-figure supplement 1A: Tissue masses (g)	gWAT	1.269	1.331	1.835	2.35	0.863	2.366	0.259	2.185	1.345	1.53367	0.104	1.04	1.326	0.598	not recorded	0.315	0.271	0.42	0.677	0.323	1.007	1.121	1.686	not recorded	1.638	0.845	1.167	1.167	0.459	1.304	not recorded	0.184	0.465	1.00391	not recorded	0.206	0.126	0.263	0.037	0.415	0.273	0.216	0.415	not recorded	0.505	0.36	0.117	0.339
Figure 8-figure supplement 1A: Tissue masses (g)	iWAT	0.427	1.689	1.793	1.366	0.515	1.307	0.233	1.798	0.746	1.09711	0.109	1.114	1.233	0.31	0.295	0.934	0.288	0.263	0.487	0.224	1.077	0.997	1.404	not recorded	1.301	0.565	0.816	0.778	0.406	0.653	0.324	0.228	0.393	0.745167	not recorded	0.256	0.205	0.217	0.228	0.342	0.25	0.284	0.404	0.29	0.404	0.473	0.36	0.325
Figure 8-figure supplement 1A: Tissue masses (g)	mWAT	0.23	0.413	0.333	0.455	0.088	0.37	0.074	0.344	0.328	0.292778	0.039	0.236	0.799	0.199	0.123	0.25	not recorded	0.181	0.17	0.167	0.564	0.276	0.552	not recorded	0.43	0.347	0.269	0.277	0.147	0.203	0.086	0.244	0.25	0.30375	0.265	0.079	0.129	0.259	0.123	0.129	0.114	0.115	0.191	0.055	0.227	0.157	0.137	0.052
Figure 8-figure supplement 1A: Tissue masses (g)	pWAT	0.598	0.342	0.675	0.526	0.183	0.555	0.098	0.555	0.544	0.452889	0.048	0.383	0.467	0.123	0.086	0.425	0.105	0.08	0.271	0.091	0.553	not recorded	0.582	not recorded	0.864	0.281	0.52	0.471	0.19	0.597	0.129	0.128	0.365	0.425455	0.485	0.139	0.087	0.143	0.104	0.182	0.13	0.072	0.148	0.145	0.214	0.224	0.118	0.13
Figure 8-figure supplement 1A: Tissue masses (g)	pcWAT	0.02	not recorded	not recorded	0.028	0.014	0.021	0.005	0.06	0.047	0.0278571	0.008	0.066	0.018	0.024	0.014	0.038	0.009	0.009	0.027	0.008	0.068	0.049	0.062	not recorded	0.127	0.015	0.039	0.054	0.038	0.046	0.016	0.012	0.036	0.0468333	0.065	0.032	0.012	0.019	0.019	0.02	0.009	0.028	not recorded	not recorded	0.012	0.034	0.019	0.015
Figure 8-figure supplement 1A: Tissue masses (g)	BAT	0.15	0.246	0.165	0.13	0.12	0.146	0.111	0.129	0.113	0.145556	0.051	0.162	0.168	0.085	0.07	0.114	0.079	0.107	0.103	0.072	0.114	0.109	0.166	not recorded	0.147	0.099	0.134	0.149	0.099	0.109	0.067	0.071	0.059	0.11025	0.119	0.049	0.074	0.269	0.068	0.071	0.081	0.084	0.087	0.059	0.063	0.071	0.062	0.069
