# Supplementary material for: The effects of caloric restriction on adipose tissue and metabolic health are sex- and age-dependent
Source: eLife journal article supplement (doi:10.7554/elife.88080), 2023-04-18
Supplement: supp [file Figure 9_Source_Data.xlsx]

## Sheet: Figures 9A-E
Figures 9A-E: glucose and OGTT data for aged mice
	Group	M AL Old	M AL Old	M AL Old	M AL Old	M AL Old	M AL Old	M AL Old	M AL Old	M AL Old	M AL Old	M CR Old	M CR Old	M CR Old	M CR Old	M CR Old	M CR Old	M CR Old	M CR Old	M CR Old	M CR Old	F AL Old	F AL Old	F AL Old	F AL Old	F AL Old	F AL Old	F AL Old	F AL Old	F AL Old	F AL Old	F AL Old	F AL Old	F AL Old	F AL Old	F CR Old	F CR Old	F CR Old	F CR Old	F CR Old	F CR Old	F CR Old	F CR Old	F CR Old	F CR Old	F CR Old	F CR Old	F CR Old	F CR Old
Figure	Mouse ID	34/ 2488	64/ 3152	65/ 3153	70/ 3166	72/ 3232	74/ 3235	79/ 3425	80/ 3427	91/ 3738	average	33/ 2487	66/ 3154	67/ 3155	68/ 3164	69/ 3165	71/ 3167	73/ 3234	77/ 3423	78/ 3424	95/ 3748	17/ 2217	18/ 2218	20/ 2220	75/ 3237	82/ 3429	83/ 3563	85/ 3565	87/ 3567	88/ 3627	92/ 3744	99/ 3758	100/ 3760	101/ 3761	average	16/ 2216	19/ 2219	21/ 2221	76/ 3238	81/ 3428	84/ 3564	86/ 3586	89/ 3628	90/ 3630	93/ 3745	94/ 3746	96/ 3755	97/ 3756	98/ 3757
Fig.9A: Random-fed glucose (mM)	Week 0	7.4	12	12	10.5	11.4	11.3	7.2	6.8	9.3	9.76667	7.7	12.7	10	9.7	10	9.9	8.9	6.9	8.7	9.1	9.8	8.8	8.3	6*	9.3	9.5	9.6	8	7.4	10.3	7.3	7.3	8.1	8.64167	8.4	7.4	7.7	6.8	5.4	8.4	10.2	5.5	7.7	7.4	10.5	7.3	8.9	7.3
Fig.9A: Random-fed glucose (mM)	Week 1	7.7	11.4	12.3	9.9	10.2	10.6	8.7	8.9	not recorded	9.9625	8.6	11.5	11.4	6.8	9.2	10.9	7.2	7.3	10.8	not recorded	8.6	8.3	7.3	7.9*	10.7	10	8.9	10.2	9.2	not recorded	not recorded	not recorded	not recorded	9.15	8.9	7.4	6.4	7.9	9.1	6.9	7	5.2	6.1	not recorded	not recorded	not recorded	not recorded	not recorded
Fig.9A: Random-fed glucose (mM)	Week 2	7.9	9.9	10	7.2	10.2	8.1	9.5	7.2	8.3	8.7	8	10.3	9.9	5.2	6	10.3	7.4	6	10.5	5.5	9.6	8.7	7.9	6.2*	10.6	12	7.9	12.1	10.4	9.1	8.4	7.3	6.9	9.24167	6.8	6.2	4.9	6.8	7.3	6.6	8.1	4.6	7.3	6.6	5.9	6	5.8	6.5
Fig.9A: Random-fed glucose (mM)	Week 3	7.6	11.4	9.3	11.4	8.4	9.3	8.7	9.2	11.1	9.6	8	8.9	11.2	5.6	8.8	9.6	6	5.7	8.9	7	8	8	7.8	na (mouse culled early for health reasons)	12.9	not recorded	not recorded	not recorded	not recorded	10.9	8.6	7.7	8.7	9.075	6.7	4.5	5.5	7.9	4.8	not recorded	not recorded	not recorded	not recorded	7.6	6.3	6.7	5.1	5.9
Fig.9A: Random-fed glucose (mM)	Week 4	9.3	10.3	10.5	9.3	10.7	9.5	7	8.7	9.2	9.38889	5.8	7	8.1	4.9	7.5	10.5	6.1	4.6	7.1	6.3	9.5	8.9	9.5	na (mouse culled early for health reasons)	4.3	12.7	9.1	10.5	9.3	10.3	8.5	8	8.8	9.11667	7.8	6.4	6.5	5.7	5.4	8.6	7.3	5.6	7.2	7	6.5	0.5	6.8	5.2
Fig.9A: Random-fed glucose (mM)	Week 5	not recorded	not recorded	not recorded	9.9	8.2	6.4	not recorded	10.3	9.4	8.84	not recorded	not recorded	not recorded	4.5	5.9	8.5	5.5	4.9	8.9	6.6	9.5	7.9	8.2	na (mouse culled early for health reasons)	8.9	11.1	9.4	10.2	not recorded	8	8.2	8.9	9.4	9.06364	7.3	7	5.8	7.9	6.7	7.3	8.7	10.3	6.5	5.9	7.7	8.4	6.4	5.3
Fig.9A: Random-fed glucose (mM)	Week 6	8.4	8.3	7.2	6.9	7.6	8.1	4.7	8.6	10.3	7.78889	6.5	9.1	5.2	6.6	6.2	10.5	7.5	4.8	6.4	5.9	12	not recorded	8.5	na (mouse culled early for health reasons)	8.9	10.2	8.8	6.9	8.2	9.9	7.4	8.4	7.6	8.8	7.3	6	5.1	8.2	7.2	8.3	7.8	5.4	7.2	6.6	8.8	8.8	8.7	5.9
Fig.9B: OGTT glucose (mM)	0 min	9.3	10.3	10.5	9.3	10.7	9.5	7	8.7	9.2	9.38889	5.8	7	8.1	4.9	7.5	10.5	6.1	4.6	7.1	6.3	9.5	8.9	9.5	not assessed	4.3	12.7	9.1	10.5	9.3	10.3	8.5	8	8.8	9.11667	7.8	6.4	6.5	5.7	5.4	8.6	7.3	5.6	7.2	7	6.5	0.5	6.8	5.2
Fig.9B: OGTT glucose (mM)	15 min	16.7	14.5	13	16.4	9.5	16.5	5.7	14.8	12.7	13.3111	7.6	12.4	15.3	8	7.9	12.9	4.2	3.8	6.4	8	9.7	13.1	10.2	not assessed	9.9	12.9	8.9	12.2	7.3	11	10	11.1	9.8	10.5083	10.9	9.4	7.3	9.1	6.7	10	9.5	3.4	7.4	5.7	10	8.9	11.3	8.2
Fig.9B: OGTT glucose (mM)	30 min	14.9	11.5	10.9	9.9	8.5	10.5	5.1	7.6	9.7	9.84444	7.7	9.3	9.7	6.7	5.3	6.8	6.7	4.3	8	9.5	13.2	13.8	9.8	not assessed	10.8	13.9	11.2	11.4	9.2	9.8	10.3	10.9	9.7	11.1667	8.7	9.1	10	5.2	6	10.8	10.4	6.5	8.8	8.8	11.5	6.9	8.4	7.1
Fig.9B: OGTT glucose (mM)	60 min	12.2	11.9	10.9	11.8	8.3	11.4	6.3	11.9	11.8	10.7222	6.6	10.4	10.5	5.7	5.3	9.6	7	4.9	6.2	7.1	10.8	12.8	11.2	not assessed	10.6	12.7	9.7	10.8	7.4	11	8.4	8.8	8.9	10.2583	10.1	8.5	6.4	5.8	4.9	7.9	7.4	9.5	7.3	6.5	6.7	6.7	6.6	5.8
Fig.9B: OGTT glucose (mM)	120 min	9.9	9.5	11.7	9.4	8.2	9	5.9	10.2	9.7	9.27778	5.1	9.3	8.5	4.4	4.8	6.9	5.1	3.9	5.6	6.2	12.5	10.8	11.3	not assessed	9	9.5	9.4	10	5.6	10.1	7.9	7.7	9	9.4	7.3	6	4.9	4.2	5	5.1	5.3	6.3	6.3	4.7	5.3	5.1	5.1	4.9
Fig.9C: OGTT AUC (mM*min)	tAUC	1502	1374	1361	1352	1034	1338	713.3	1300	1300	1252.7	780.8	1195	1236	696	676.5	1064	727.5	525.8	776.3	886.5	1375	1474	1288	na (mouse culled early for health reasons)	1171	1458	1172	1304	887.3	1261	1061	1099	1102	1221.02	1091	956.3	818.3	683.3	646.5	966	923.3	855.8	880.5	769.5	918	747	859.5	729.8
Fig.9C: OGTT AUC (mM*min)	iAUC	385.5	154	100.5	235.5	250.5	201.1	126.8	266.7	195.8	212.933	104.4	354.8	264	119.5	230.4	245.9	77.24	36.15	96.84	130.8	234.8	405.8	147.8	na (mouse culled early for health reasons)	654.8	126	81.88	63	228.8	36.79	82.66	141.2	45.75	187.44	160.6	192.1	140.3	96.65	59.32	191.1	161.5	240.2	65.1	128.4	199.7	687	158.2	108.8
Fig.9D: Insulin concentrations (ng/mL)	0 min	not assessed	not assessed	3.69729	6.42058	not assessed	3.04513	not assessed	3.17413	3.12087	3.8916	0.755142	2.9692	4.28572	0.264835	0.642497	1.45954	0.736545	0.341404	1.98004	2.9937	1.73434	1.41422	2.75223	not assessed	4.40295	1.00438	1.0526	1.52271	1.96803	1.49969	1.28353	0.550993	1.51065	1.72469	1.90844	0.899247	0.920002	not assessed	0.647063	2.72812	0.442914	0.377567	0.558378	1.98004	1.25951	0.815186	0.683089	0.666866
Fig.9D: Insulin concentrations (ng/mL)	15 min	not assessed	not assessed	11.1668	28.5865	not assessed	16.4205	not assessed	13.0706	8.39272	15.5274	1.6558	10.9129	14.277	1.98415	1.26997	17.314	3.12449	1.24546	2.96476	3.20825	2.50289	1.72763	7.58594	not assessed	2.50876	1.95666	1.66736	3.82505	2.96476	2.46039	1.77589	0.803177	2.08925	2.65565	2.33034	2.10012	0.968219	not assessed	0.707107	9.91238	0.863221	0.486054	1.04054	3.04882	0.995317	2.37633	1.54772	1.47449
Fig.9D: Insulin concentrations (ng/mL)	30 min	not assessed	not assessed	5.87088	6.48671	not assessed	3.3067	not assessed	3.2585	4.15363	4.61528	1.13942	3.2585	5.34249	0.84088	0.226628	4.95989	2.0591	0.775353	2.65253	3.37871	2.0591	2.30623	2.72812	not assessed	3.18327	1.71558	2.19774	3.70451	3.39707	1.76388	1.35558	0.695098	1.28163	2.19898	1.70352	0.923265	0.715082	not assessed	0.899247	4.62062	0.743133	0.510162	1.10081	5.64271	2.43637	1.57174	0.863221	1.07671
Fig.9D: Insulin concentrations (ng/mL)	60 min	not assessed	not assessed	4.28572	7.53152	not assessed	5.21853	not assessed	2.18569	4.36978	4.71825	1.51169	4.94608	4.22568	0.5749	0.200177	2.05616	2.11494	0.630703	2.0641	1.56534	1.23618	1.16109	2.31828	not assessed	1.78724	1.22136	1.28163	1.31779	2.29227	2.80864	1.03134	1.01933	1.86022	1.61128	1.31779	0.923265	0.787407	not assessed	0.538984	3.92148	0.57501	0.582487	0.73919	2.4724	2.66454	1.33156	0.550993	1.10081
Fig.9D: Insulin concentrations (ng/mL)	120 min	not assessed	not assessed	6.49534	7.41543	not assessed	4.48671	not assessed	2.77634	4.65799	5.16636	1.13942	4.71705	5.34249	1.91656	0.5749	4.20016	1.60943	0.88384	2.0641	1.56534	3.46247	1.12492	2.01693	not assessed	1.55359	1.26957	1.17314	1.86022	1.87196	2.22021	0.983308	0.647063	1.57093	1.64619	1.54682	1.07938	0.715082	not assessed	0.563001	3.92148	0.502957	0.365512	0.920002	1.83593	1.31955	1.07938	0.611036	0.799461
Fig.9E: HOMA-IR and Matsuda Index	HOMA-IR	na	na	49.549	76.2113	na	36.9226	na	35.2456	36.6459	46.9149	5.59009	26.5277	44.3069	1.65628	6.15028	19.5599	5.73445	2.00442	17.9429	24.0719	21.029	16.0646	33.3711	na	24.1643	16.2804	12.2255	20.4065	23.3602	19.7151	13.9247	5.62597	16.9672	18.5945	18.9992	7.34549	7.63246	na	4.45966	29.945	4.12671	2.69863	5.13125	17.6902	10.4491	0.520222	5.92855	4.42592
Fig.9E: HOMA-IR and Matsuda Index	Matsuda Index	na	na	0.377758	0.237463	na	0.441908	na	0.562324	0.499357	0.423762	3.15487	0.590045	0.418568	6.67224	5.47123	0.741607	2.6092	8.3504	1.34298	1.10499	0.963306	1.2906	0.666185	na	0.950147	1.31124	1.655	0.983352	1.06067	0.99265	1.80691	3.38485	1.34847	1.36778	1.31008	2.71392	3.41562	na	5.57161	0.64747	4.94051	7.11834	3.79982	1.19497	1.73335	10.2217	3.8539	4.12967
