# Supplementary material for: The effects of caloric restriction on adipose tissue and metabolic health are sex- and age-dependent
Source: eLife journal article supplement (doi:10.7554/elife.88080), 2023-04-18
Supplement: supp [file Figure 10-figure supplement 2_Source_Data.xlsx]

## Sheet: Fig 10-fig supp 2
Figure 10-figure supplement 2 – fat mass (fold-change vs the [fold-change vs week 0] for AL mice in each sex)
	Group	M CR Young	M CR Young	M CR Young	M CR Young	M CR Young	M CR Young	M CR Young	M CR Young	M CR Young	M CR Young	M CR Young	M CR Young	M CR Young	M CR Young	M CR Young	M CR Young	M CR Young	M CR Young	M CR Young	M CR Young	M CR Young	M CR Young	M CR Young	M CR Young	M CR Young	M CR Young	M CR Young	M CR Young	M CR Young	M CR Young	M CR Young	M CR Young	M CR Young	M CR Young	M CR Young	M CR Young	M CR Young	M CR Young	M CR Young	M CR Young	M CR Young	M CR Young	M CR Young	M CR Young	M CR Young	F CR Young	F CR Young	F CR Young
	Study	Ben_CR	Ben_CR	Ben_CR	Ben_CR	Ben_CR	Ben_CR	Ben_CR	Ben_CR	Ben_CR	Exp054_CRTC	Exp054_CRTC	Exp054_CRTC	Exp054_CRTC	Exp054_CRTC	Exp054_CRTC	Exp054_CRTC	Exp054_CRTC	Exp054_CRTC	Exp054_CRTC	Exp054_CRTC	Exp054_CRTC	Exp054_CRTC	Exp054_CRTC	Exp054_CRTC	Exp054_CRTC	Exp054_CRTC	Exp046_Del1_WT	Exp046_Del1_WT	Exp046_Del1_WT	Exp046_Del1_WT	Exp046_Del1_WT	Exp046_Del1_WT	Exp046_Del1_WT	Exp046_Del1_WT	Exp046_Del1_WT	Exp046_Del1_WT	Exp046_Del1_WT	Exp064_CR_PETCT	Exp064_CR_PETCT	Exp064_CR_PETCT	Exp064_CR_PETCT	Exp064_CR_PETCT	Exp064_CR_PETCT	Exp064_CR_PETCT		Ben_CR	Ben_CR	Ben_CR
	Mouse ID	2/ 4751	8/ 4792	9/ 4793	22/ 5073	23/ 5074	27/ 5098	28/ 5099	57/ 5815	59/ 5817	79	87	89	90	95	171	301	502	503	504	A95	154	155	157	196	199	200	448153//297//3	453962//318//3	458753//319//1	469192//341//1	480391//364//3	486644//385//11	486666//387//1	486670//391//11	486761//394//1	626401//485//3	448109//290//1	3m C1	4m C1	1m C2	11m C3	13m C3	4584 C4	4586 C4	AVERAGE	3/ 4752	4/ 4753	10/ 4794
	Week 0	1	1	1	1	1	1	1	1	1	1	1	1	1	1	1	1	1	1	1	1	1	1	1	1	1	1	1	1	1	1	1	1	1	1	1	1	1	1	1	1	1	1	1	1	1	1	1	1
	Week 1																				0.0424766							0.778488	0.448685	0.459735	0.231018	0.660921	0.566886	0.240124	-0.16988	0.524477	0.475987	0.663404	1.19142	1.31306	0.906939	0.401899				0.545978
	Week 2	0.375977	0.0274241				0.415709		0.00622129	0.245733	0.269935	0.0910435	0.132244		0.115823	0.159032			0.724847		0.343421	2.73698	0.821465	0.849518	0.911218	0.402931	0.530856	0.422577	0.241044	0.18483	-0.0564334	0.433202	0.102645	0.161699	0.337279	0.275361	0.489277	0.26497	0.296466	0.247143	0.522213	0.26076	0.17015	0.227127	0.16909	0.386383	0.227544	0.205309	0.271053
	Week 3																											0.590072	0.306709	0.178011	0.0935346	0.411414	0.13137	0.142329	0.154096	0.0822441	0.523541	0.298575	0.179063	0.559323	0.605692	0.312115	0.576104			0.321512
FINAL DATA FOR Figure 10-figure supplement 2	Week 4										0.0596788	0.256793	0.401012	0.0636074	0.0489899	0.516832	0.765295	0.691561	0.884409	0.25419								0.274283	0.232982	0.141564	0.089143	0.304102	0.506791	0.311969	0.3223	0.144454	0.223266	0.1387	0.191003	0.452186	0.555057	0.222846	0.570022			0.331655
	Week 5																											0.425729	0.228407	0.181903	0.111594	0.354796	0.440563	0.139079	0.302492	0.249571	0.337866	0.118336	0.125968	0.123363	0.629906	0.18034	0.609953			0.284991
	Week 6										0.258156	0.752843	1.04535	0.463473	0.241105	1.31526												0.354628	0.293429	0.368663	0.0997867	0.59414	0.472113	0.201492	0.26115	0.145802	0.329974	0.107779								0.429714
Figure 10-figure supplement 2 - underlying calcluations for Fat mass vs week 0 in CR and AL mice
	Group	M CR Young	M CR Young	M CR Young	M CR Young	M CR Young	M CR Young	M CR Young	M CR Young	M CR Young	M CR Young	M CR Young	M CR Young	M CR Young	M CR Young	M CR Young	M CR Young	M CR Young	M CR Young	M CR Young	M CR Young	M CR Young	M CR Young	M CR Young	M CR Young	M CR Young	M CR Young	M CR Young	M CR Young	M CR Young	M CR Young	M CR Young	M CR Young	M CR Young	M CR Young	M CR Young	M CR Young	M CR Young	M CR Young	M CR Young	M CR Young	M CR Young	M CR Young	M CR Young	M CR Young	M CR Young	F CR Young	F CR Young	F CR Young
	Study	Ben_CR	Ben_CR	Ben_CR	Ben_CR	Ben_CR	Ben_CR	Ben_CR	Ben_CR	Ben_CR	Exp054_CRTC	Exp054_CRTC	Exp054_CRTC	Exp054_CRTC	Exp054_CRTC	Exp054_CRTC	Exp054_CRTC	Exp054_CRTC	Exp054_CRTC	Exp054_CRTC	Exp054_CRTC	Exp054_CRTC	Exp054_CRTC	Exp054_CRTC	Exp054_CRTC	Exp054_CRTC	Exp054_CRTC	Exp046_Del1_WT	Exp046_Del1_WT	Exp046_Del1_WT	Exp046_Del1_WT	Exp046_Del1_WT	Exp046_Del1_WT	Exp046_Del1_WT	Exp046_Del1_WT	Exp046_Del1_WT	Exp046_Del1_WT	Exp046_Del1_WT	Exp064_CR_PETCT	Exp064_CR_PETCT	Exp064_CR_PETCT	Exp064_CR_PETCT	Exp064_CR_PETCT	Exp064_CR_PETCT	Exp064_CR_PETCT		Ben_CR	Ben_CR	Ben_CR
	Mouse ID	2/ 4751	8/ 4792	9/ 4793	22/ 5073	23/ 5074	27/ 5098	28/ 5099	57/ 5815	59/ 5817	79	87	89	90	95	171	301	502	503	504	A95	154	155	157	196	199	200	448153//297//3	453962//318//3	458753//319//1	469192//341//1	480391//364//3	486644//385//11	486666//387//1	486670//391//11	486761//394//1	626401//485//3	448109//290//1	3m C1	4m C1	1m C2	11m C3	13m C3	4584 C4	4586 C4	AVERAGE	3/ 4752	4/ 4753	10/ 4794
Fat mass (g)	Week 0	1.685	2.228	1.868	1.093	0.909	0.976	0.42	2.843	1.433	2.339	1.042	0.766	1.528	2.286	0.883	0.993	0.668	0.857	2.066	1.723	0.366	1.087	1.4	0.847	2.82	1.99	1.763	1.303	1.65	1.871	1.648	0.966	1.359	0.963	3.198	1.297	3.198	2.249	0.72	1.519	2.633	0.882	1.397	2.054	1.54059	1.413	1.547	1.145
Fat mass (g)	Week 1																				0.085							1.594	0.679	0.881	0.502	1.265	0.636	0.379	-0.19	1.948	0.717	2.464	3.112	1.098	1.6	1.229		X	X	1.12494
Fat mass (g)	Week 2	1.182	0.114	-0.094*	-0.044*	-0.206*	0.757	-0.023*	0.033	0.657	1.178	0.177	0.189	0*	0.494	0.262	0*	0*	1.159	0*	1.104	1.869	1.666	2.219	1.44	2.12	1.971	1.39	0.586	0.569	-0.197	1.332	0.185	0.41	0.606	1.643	1.184	1.581	1.244	0.332	1.48	1.281	0.28	0.592	0.648	0.937139	0.576	0.569	0.556
Fat mass (g)	Week 3																											2.033	0.781	0.574	0.342	1.325	0.248	0.378	0.29	0.514	1.327	1.866	0.787	0.787	1.798	1.606	0.993	X	X	0.978063
Fat mass (g)	Week 4										0.349	0.669	0.768	0.243	0.28	1.141	1.9	1.155	1.895	1.313								1.209	0.759	0.584	0.417	1.253	1.224	1.06	0.776	1.155	0.724	1.109	1.074	0.814	2.108	1.467	1.257	X	X	1.02704
Fat mass (g)	Week 5																											1.783	0.707	0.713	0.496	1.389	1.011	0.449	0.692	1.896	1.041	0.899	0.673	0.211	2.273	1.128	1.278	X	X	1.03994
Fat mass (g)	Week 6										1.892	2.458	2.509	2.219	1.727	3.639												1.959	1.198	1.906	0.585	3.068	1.429	0.858	0.788	1.461	1.341	1.08								1.77159
Fat mass (vs week 0)	Week 0	1	1	1	1	1	1	1	1	1	1	1	1	1	1	1	1	1	1	1	1	1	1	1	1	1	1	1	1	1	1	1	1	1	1	1	1	1	1	1	1	1	1	1	1	1	1	1	1
Fat mass (vs week 0)	Week 1																				0.0493326							0.904141	0.521105	0.533939	0.268306	0.767597	0.658385	0.278882	-0.1973	0.609131	0.552814	0.770482	1.38373	1.525	1.05332	0.466768				0.634102
Fat mass (vs week 0)	Week 2	0.701484	0.051167				0.775615		0.0116075	0.458479	0.503634	0.169866	0.246736		0.216098	0.296716			1.35239		0.640743	5.10656	1.53266	1.585	1.70012	0.751773	0.990452	0.788429	0.449731	0.344848	-0.105291	0.808252	0.191511	0.301692	0.629283	0.513759	0.912876	0.494371	0.553135	0.461111	0.974325	0.486517	0.31746	0.423765	0.315482	0.720899	0.407643	0.367809	0.48559
Fat mass (vs week 0)	Week 3																											1.15315	0.599386	0.347879	0.18279	0.804005	0.256729	0.278146	0.301142	0.160725	1.02313	0.58349	0.349933	1.09306	1.18367	0.609951	1.12585			0.628315
Fat mass (vs week 0)	Week 4										0.149209	0.642035	1.00261	0.159031	0.122485	1.29219	1.91339	1.72904	2.2112	0.635528								0.685763	0.582502	0.353939	0.222875	0.760316	1.26708	0.779985	0.805815	0.361163	0.558211	0.346779	0.477546	1.13056	1.38776	0.557159	1.42517			0.829205
Fat mass (vs week 0)	Week 5																											1.01134	0.542594	0.432121	0.265099	0.84284	1.04658	0.33039	0.718588	0.592871	0.802621	0.281113	0.299244	0.293056	1.49638	0.428409	1.44898			0.677015
Fat mass (vs week 0)	Week 6										0.808893	2.35893	3.27546	1.45223	0.755468	4.12118												1.11117	0.919417	1.15515	0.312667	1.86165	1.4793	0.631347	0.818276	0.456848	1.03392	0.337711								1.34645
[truncated: 187 more columns]
