# Supplementary material for: The effects of caloric restriction on adipose tissue and metabolic health are sex- and age-dependent
Source: eLife journal article supplement (doi:10.7554/elife.88080), 2023-04-18
Supplement: supp [file Figure 10-figure supplement 3_Source_Data.xlsx]

## Sheet: Fig 10-fig supp 3
Figure 10-figure supplement 3: baseline % fat mass in human subjects
	Sex	Females	Females	Females	Females	Females	Females	Females	Females	Females	Females	Females	Females	Females	Females	Females	Females	Females	Females	Females	Females	Females	Females	Males	Males	Males	Males	Males	Males	Males	Males	Males	Males	Males	Males	Males	Males	Males	Males	Males	Males	Males	Males
	ID	008	006	014	040	010	024	038	018	002	032	044	022	016	020	042	034	004	012	026	030	046	028	021	025	015	007	003	005	023	033	009	019	011	043	037	029	017	039	013	027	031	035
Fig.S15: Fat mass (% body mass)	Week 0	43.6184	52.4455	46.0151	52.9482	42.9194	33.518	43.5009	46.7632	52.5901	42.6939	41.0429	46.269	45.3165	46.8647	50.2187	52.6365	46.2887	44.0143	42.2947	50.0872	49.5782	49.1958	28.9742	30.9669	39.2755	42.5609	30.5769	41.9326	44.2479	37.9157	40.7352	32.2179	30.2052	43.7937	44.4621	33.0906	43.2124	34.6249	37.1646	35.2357	38.0682	34.6394
Data from Figure 10, used for calculations above
	Sex	Females	Females	Females	Females	Females	Females	Females	Females	Females	Females	Females	Females	Females	Females	Females	Females	Females	Females	Females	Females	Females	Females	Males	Males	Males	Males	Males	Males	Males	Males	Males	Males	Males	Males	Males	Males	Males	Males	Males	Males	Males	Males
	ID	008	006	014	040	010	024	038	018	002	032	044	022	016	020	042	034	004	012	026	030	046	028	021	025	015	007	003	005	023	033	009	019	011	043	037	029	017	039	013	027	031	035
Fig.10A: Body mass (kg)	Week 0	78.85	102.6	74.6	117.75	76.15	71.9	70.6	80.75	103	84.25	73.65	79.45	74.5	79.25	92	107.6	78.7	85.1	76.8	74	84.05	79.95	91.9	109.2	135.75	107.6	94.65	120.7	135.15	102.65	123.65	85.6	98.2	105.65	125.3	91.6	109.65	92.35	116.95	105.85	126.05	107.75
Fig.10C: Fat mass (kg)	Week 0	34.3931	53.8091	34.3272	62.3465	32.6831	24.0995	30.7117	37.7613	54.1678	35.9696	30.2281	36.7607	33.7608	37.1403	46.2012	56.6369	36.4292	37.4562	32.4823	37.0645	41.6705	39.3321	26.6273	33.8158	53.3164	45.7956	28.941	50.6127	59.801	38.9204	50.3691	27.5785	29.6615	46.268	55.711	30.311	47.3823	31.9761	43.464	37.297	47.9849	37.324
