# Supplementary material for: The effects of caloric restriction on adipose tissue and metabolic health are sex- and age-dependent
Source: eLife journal article supplement (doi:10.7554/elife.88080), 2023-04-18
Supplement: supp [file Figure 10_Source_Data.xlsx]

## Sheet: Figures 10A-L
Figures 10A-L: human weight loss study
	Sex	Females	Females	Females	Females	Females	Females	Females	Females	Females	Females	Females	Females	Females	Females	Females	Females	Females	Females	Females	Females	Females	Females	Males	Males	Males	Males	Males	Males	Males	Males	Males	Males	Males	Males	Males	Males	Males	Males	Males	Males	Males	Males
	ID	008	006	014	040	010	024	038	018	002	032	044	022	016	020	042	034	004	012	026	030	046	028	021	025	015	007	003	005	023	033	009	019	011	043	037	029	017	039	013	027	031	035
Fig 10G, 10H and 10I (Ages for x-axes)	Age	21	29	29	37	39	39	41	42	43	43	45	46	49	50	50	51	52	53	53	56	57	58	23	26	35	39	43	46	48	49	50	51	52	52	53	55	56	56	59	59	59	61
Fig.10A: Body mass (kg)	Week 0	78.85	102.6	74.6	117.75	76.15	71.9	70.6	80.75	103	84.25	73.65	79.45	74.5	79.25	92	107.6	78.7	85.1	76.8	74	84.05	79.95	91.9	109.2	135.75	107.6	94.65	120.7	135.15	102.65	123.65	85.6	98.2	105.65	125.3	91.6	109.65	92.35	116.95	105.85	126.05	107.75
Fig.10A: Body mass (kg)	Week 1	77.45	99.9	74	115.45	74.7	69.65	70.2	79.6	102.25	83.3	71.7	77.85	73.5	77.85	90.1	105.85	76.6	83.75	75.2	73.2	82.25	77.95	89.9	107.75	132.7	104.6	92.9	118.35	132.55	99.95	121.15	83.4	96.65	103.25	122.6	89.65	105.95	89.6	113.1	102.95	123.4	103.85
Fig.10A: Body mass (kg)	Week 2	76.95	97.45	73.25	115.4	74.95	69.15	69.55	78.65	101.15	82.15	70.5	76.9	72.95	78.05	89.65	105.15	75.8	82.65	74.1	72.45	81.55	77.1	88.45	107.45	130.5	103.3	92.1	117.2	132.05	98.8	119.55	83.15	95.3	102.65	120.8	88.4	104.1	89.35	111.55	102.1	122.6	104.25
Fig.10A: Body mass (kg)	Week 3	77.15	99.1	73	113.4	74.6	67.95	69.15	77.9	98.9	81.2	69.75	75.7	72.25	76.45	89.15	105.25	75.25	81.65	73.45	72.15	80.8	76.1	87.55	106.5	128.65	102	90.6	115.7	130.3	97.25	120.25	83	94.45	102.1	120.2	87.35	102.2	86.15	110.5	101.3	121.2	103.55
Fig.10A: Body mass (kg)	Week 4	76.25	97.45	71.75	112.6	73.25	67.35	69.1	77	98.35	80.9	69.803	74.6	71.9	75.45	87.8	104.1	74.65	80.9	72.7	71.95	80.6	75.2	86.5	105.4	126.45	100.75	89.55	114.75	129.35	96.55	119.5	81.55	93.05	100.65	119.15	86.85	100.9	87.65	110.3	100.8	120.75	99.1
Fig.10B: Body mass (fold vs week 0)	Week 0	1	1	1	1	1	1	1	1	1	1	1	1	1	1	1	1	1	1	1	1	1	1	1	1	1	1	1	1	1	1	1	1	1	1	1	1	1	1	1	1	1	1
Fig.10B: Body mass (fold vs week 0)	Week 1	0.982245	0.973684	0.991957	0.980467	0.980959	0.968707	0.994334	0.985759	0.992718	0.988724	0.973523	0.979862	0.986577	0.982334	0.979348	0.983736	0.973316	0.984136	0.979167	0.989189	0.978584	0.974984	0.978237	0.986722	0.977532	0.972119	0.981511	0.98053	0.980762	0.973697	0.979782	0.974299	0.984216	0.977283	0.978452	0.978712	0.966256	0.970222	0.96708	0.972603	0.978977	0.963805
Fig.10B: Body mass (fold vs week 0)	Week 2	0.975904	0.949805	0.981903	0.980042	0.984242	0.961752	0.985127	0.973994	0.982039	0.975074	0.95723	0.967904	0.979195	0.984858	0.974457	0.97723	0.963151	0.97121	0.964844	0.979054	0.970256	0.964353	0.962459	0.983974	0.961326	0.960037	0.973059	0.971002	0.977063	0.962494	0.966842	0.971379	0.970468	0.971604	0.964086	0.965066	0.949384	0.967515	0.953826	0.964573	0.97263	0.967517
Fig.10B: Body mass (fold vs week 0)	Week 3	0.97844	0.965887	0.978552	0.963057	0.979645	0.945063	0.979462	0.964706	0.960194	0.963798	0.947047	0.952801	0.969799	0.964669	0.969022	0.97816	0.956163	0.959459	0.95638	0.975	0.961333	0.951845	0.952666	0.975275	0.947698	0.947955	0.957211	0.958575	0.964114	0.947394	0.972503	0.969626	0.961813	0.966398	0.959298	0.953603	0.932057	0.932864	0.944848	0.957015	0.961523	0.961021
Fig.10B, 10G and 10J: Body mass (fold vs week 0)	Week 4	0.967026	0.949805	0.961796	0.956263	0.961917	0.936718	0.978754	0.95356	0.954854	0.960237	0.947766	0.938955	0.965101	0.95205	0.954348	0.967472	0.948539	0.950646	0.946615	0.972297	0.958953	0.940588	0.94124	0.965201	0.931492	0.936338	0.946117	0.950704	0.957085	0.940575	0.966438	0.952687	0.947556	0.952674	0.950918	0.948144	0.920201	0.949107	0.943138	0.952291	0.957953	0.919722
Fig.10C: Fat mass (kg)	Week 0	34.3931	53.8091	34.3272	62.3465	32.6831	24.0995	30.7117	37.7613	54.1678	35.9696	30.2281	36.7607	33.7608	37.1403	46.2012	56.6369	36.4292	37.4562	32.4823	37.0645	41.6705	39.3321	26.6273	33.8158	53.3164	45.7956	28.941	50.6127	59.801	38.9204	50.3691	27.5785	29.6615	46.268	55.711	30.311	47.3823	31.9761	43.464	37.297	47.9849	37.324
Fig.10C: Fat mass (kg)	Week 4	33.8752	50.8711	31.5245	57.1698	30.1309	19.3722	30.1052	33.1617	50.1521	32.9224	27.4584	31.8259	30.2256	33.4999	41.977	53.1816	32.4762	30.902	29.0417	35.5728	38.2015	34.756	20.6624	28.7942	45.0215	40.6875	23.595	46.8181	56.087	33.9272	46.8448	24.7031	26.8333	43.5049	52.7791	26.2016	41.8393	27.6008	38.541	34.8547	42.5573	31.4228
Fig.10D: kg Fat mass (fold vs week 0)	Week 0	1	1	1	1	1	1	1	1	1	1	1	1	1	1	1	1	1	1	1	1	1	1	1	1	1	1	1	1	1	1	1	1	1	1	1	1	1	1	1	1	1	1
Fig.10D, 10H and 10K: kg Fat mass (fold vs week 0)	Week 4	0.984939	0.9454	0.918353	0.916969	0.92191	0.803844	0.980253	0.878192	0.925865	0.915283	0.908373	0.86576	0.895287	0.901982	0.908569	0.938992	0.891489	0.825018	0.894076	0.959755	0.916752	0.883655	0.775986	0.851501	0.844421	0.888459	0.81528	0.925026	0.937893	0.871708	0.930031	0.895738	0.904652	0.94028	0.947374	0.864425	0.883014	0.863171	0.886735	0.934517	0.886888	0.841893
Fig.10E: Fat-free mass (kg)	Week 0	44.3725	48.7028	40.2521	55.9237	43.5228	47.5935	39.9562	43.0128	48.849	48.2457	43.4248	42.7823	40.6771	42.1146	45.7454	50.8681	42.2685	47.6864	44.3799	36.9277	42.3516	40.6794	65.3477	75.2661	82.354	61.7354	65.6331	70.1138	75.1694	63.85	73.366	57.956	68.5206	59.4046	69.3998	61.2459	61.8101	60.1983	73.6667	68.46	78.1796	70.4682
Fig.10E: Fat-free mass (kg)	Week 4	42.281	46.5662	40.1932	55.597	43.1836	47.8364	39.0047	43.8565	48.16	47.9115	42.3334	42.8758	41.6184	41.816	45.7284	51.2463	42.1483	49.9912	43.7737	36.4124	42.3711	40.4976	65.9329	76.6676	81.407	60.0223	65.9011	67.8749	73.3017	62.7282	72.5708	56.7183	66.2015	57.1119	66.1375	60.7172	59.0135	60.0422	71.8752	65.8608	78.3672	67.8023
Fig.10F: kg Fat-free mass (Fold vs week 0)	Week 0	1	1	1	1	1	1	1	1	1	1	1	1	1	1	1	1	1	1	1	1	1	1	1	1	1	1	1	1	1	1	1	1	1	1	1	1	1	1	1	1	1	1
Fig.10F, 10I and 10L: kg Fat-free mass (Fold vs week 0)	Week 4	0.952866	0.956128	0.998537	0.994159	0.992206	1.0051	0.976185	1.01961	0.985895	0.993073	0.974867	1.00218	1.02314	0.992908	0.999627	1.00744	0.997156	1.04833	0.98634	0.986047	1.00046	0.995531	1.00895	1.01862	0.988502	0.97225	1.00408	0.968067	0.975153	0.98243	0.989161	0.978644	0.966155	0.961405	0.952993	0.991367	0.954755	0.997406	0.975681	0.962033	1.0024	0.962169
