# Supplementary material for: The effects of caloric restriction on adipose tissue and metabolic health are sex- and age-dependent
Source: eLife journal article supplement (doi:10.7554/elife.88080), 2023-04-18
Supplement: supp [file Literature_Search_Humans.xlsx]

## Sheet: pubmed_result Humans NOT review
PMID	Title	Authors	Citation	First Author	Journal/Book	Publication Year	Create Date	PMCID	NIHMS ID	DOI
34836280	Short-Term Pre-Operative Protein Caloric Restriction in Elective Vascular Surgery Patients: A Randomized Clinical Trial	Kip P, Sluiter TJ, Moore JK, Hart A, Ruske J, O'Leary J, Jung J, Tao M, MacArthur MR, Heindel P, de Jong A, de Vries MR, Burak MF, Mitchell SJ, Mitchell JR, Ozaki CK.	Nutrients. 2021 Nov 11;13(11):4024. doi: 10.3390/nu13114024.	Kip P	Nutrients	2021	27/11/2021	PMC8621550		10.3390/nu13114024
34836028	Elective Surgery in Adult Patients with Excess Weight: Can Preoperative Dietary Interventions Improve Surgical Outcomes? A Systematic Review	Griffin SB, Palmer MA, Strodl E, Lai R, Burstow MJ, Ross LJ.	Nutrients. 2021 Oct 25;13(11):3775. doi: 10.3390/nu13113775.	Griffin SB	Nutrients	2021	27/11/2021	PMC8623302		10.3390/nu13113775
34835943	Lower Interstitial Glucose Concentrations but Higher Glucose Variability during Low-Energy Diet Compared to Regular Diet-An Observational Study in Females with Obesity	Nilsen I, Andersson A, Laurenius A, Osterberg J, Sundbom M, Haenni A.	Nutrients. 2021 Oct 20;13(11):3687. doi: 10.3390/nu13113687.	Nilsen I	Nutrients	2021	27/11/2021	PMC8623427		10.3390/nu13113687
34836342	No Significant Effect of the Individual Chronotype on the Result of Moderate Calorie Restriction for Obesity-A Pilot Study	Strojny Z, Rutkowski R, Kanikowska A, Zawada A, Juchacz A, Grzymisławski M, Sato M, Litwinowicz M, Korybalska K, Bręborowicz A, Witowski J, Kanikowska D.	Nutrients. 2021 Nov 15;13(11):4089. doi: 10.3390/nu13114089.	Strojny Z	Nutrients	2021	27/11/2021	PMC8617879		10.3390/nu13114089
34835951	Reply to Landry et al. Findings from Diet Comparison Difficult to Interpret in the Absence of Adherence Assessment. Comment on "Tricò et al. Effects of Low-Carbohydrate versus Mediterranean Diets on Weight Loss, Glucose Metabolism, Insulin Kinetics and β-Cell Function in Morbidly Obese Individuals. Nutrients 2021, 13, 1345"	Tricò D, Moriconi D, Nannipieri M.	Nutrients. 2021 Oct 21;13(11):3695. doi: 10.3390/nu13113695.	Tricò D	Nutrients	2021	27/11/2021	PMC8617652		10.3390/nu13113695
34836064	Colonic Medium-Chain Fatty Acids Act as a Source of Energy and for Colon Maintenance but Are Not Utilized to Acylate Ghrelin	Gregor A, Auernigg-Haselmaier S, Trajanoski S, König J, Duszka K.	Nutrients. 2021 Oct 26;13(11):3807. doi: 10.3390/nu13113807.	Gregor A	Nutrients	2021	27/11/2021	PMC8617845		10.3390/nu13113807
34770157	The Comparison of the Effects between Continuous and Intermittent Energy Restriction in Short-Term Bodyweight Loss for Sedentary Population: A Randomized, Double-Blind, Controlled Trial	Xu M, Li J, Zou Y, Xu Y.	Int J Environ Res Public Health. 2021 Nov 5;18(21):11645. doi: 10.3390/ijerph182111645.	Xu M	Int J Environ Res Public Health	2021	13/11/2021	PMC8583133		10.3390/ijerph182111645
34684551	Eucaloric Balanced Diet Improved Objective Sleep in Adolescents with Obesity	Saidi O, Rochette E, Del Sordo G, Doré É, Merlin É, Walrand S, Duché P.	Nutrients. 2021 Oct 10;13(10):3550. doi: 10.3390/nu13103550.	Saidi O	Nutrients	2021	23/10/2021	PMC8537106		10.3390/nu13103550
34684431	Hypocaloric Dieting Unsettles the Neuroenergetic Homeostasis in Humans	Wardzinski EK, Hyzy C, Duysen KU, Melchert UH, Jauch-Chara K, Oltmanns KM.	Nutrients. 2021 Sep 28;13(10):3433. doi: 10.3390/nu13103433.	Wardzinski EK	Nutrients	2021	23/10/2021	PMC8541113		10.3390/nu13103433
34684639	Insulin/IGF-1 Signaling Is Downregulated in Barrett's Esophagus Patients Undergoing a Moderate Calorie and Protein Restriction Program: A Randomized 2-Year Trial	Arcidiacono D, Zaramella A, Fabris F, Sánchez-Rodríguez R, Nucci D, Fassan M, Nardi M, Benna C, Cristofori C, Morbin T, Pucciarelli S, Fantin A, Realdon S.	Nutrients. 2021 Oct 17;13(10):3638. doi: 10.3390/nu13103638.	Arcidiacono D	Nutrients	2021	23/10/2021	PMC8537306		10.3390/nu13103638
34684496	The iMPROVE Study; Design, Dietary Patterns, and Development of a Lifestyle Index in Overweight and Obese Greek Adults	Kafyra M, Kalafati IP, Katsareli EA, Lambrinou S, Varlamis I, Kaliora AC, Dedoussis GV.	Nutrients. 2021 Oct 3;13(10):3495. doi: 10.3390/nu13103495.	Kafyra M	Nutrients	2021	23/10/2021	PMC8537271		10.3390/nu13103495
34684393	Effects of a Calorie-Restricted Mediterranean-Style Diet on Plasma Lipids in Hypercholesterolemic South Korean Patients	Son DH, Kwon YJ, Lee HS, Kim HM, Lee JW.	Nutrients. 2021 Sep 27;13(10):3393. doi: 10.3390/nu13103393.	Son DH	Nutrients	2021	23/10/2021	PMC8539389		10.3390/nu13103393
34673700	Exercise Plus Weight Loss Improves Aortic Stiffness in Obese Older Adults	Rosenberg K.	Am J Nurs. 2021 Nov 1;121(11):69. doi: 10.1097/01.NAJ.0000799032.97847.64.	Rosenberg K	Am J Nurs	2021	21/10/2021			10.1097/01.NAJ.0000799032.97847.64
34639544	Weight Loss Barriers and Dietary Quality of Intermittent and Continuous Dieters in Women with a History of Gestational Diabetes	Gray KL, Clifton PM, Keogh JB.	Int J Environ Res Public Health. 2021 Sep 29;18(19):10243. doi: 10.3390/ijerph181910243.	Gray KL	Int J Environ Res Public Health	2021	13/10/2021	PMC8508568		10.3390/ijerph181910243
34629067	Rationale and design of the Diet Restriction and Exercise-induced Adaptations in Metastatic breast cancer (DREAM) study: a 2-arm, parallel-group, phase II, randomized control trial of a short-term, calorie-restricted, and ketogenic diet plus exercise during intravenous chemotherapy versus usual care	Kirkham AA, King K, Joy AA, Pelletier AB, Mackey JR, Young K, Zhu X, Meza-Junco J, Basi SK, Hiller JP, Brkin T, Michalowski B, Pituskin E, Paterson DI, Courneya KS, Thompson RB, Prado CM.	BMC Cancer. 2021 Oct 10;21(1):1093. doi: 10.1186/s12885-021-08808-2.	Kirkham AA	BMC Cancer	2021	2021-11-10	PMC8504029		10.1186/s12885-021-08808-2
34624324	Neurons die with heightened but functional macro- and chaperone mediated autophagy upon increased amyloid-ß induced toxicity with region-specific protection in prolonged intermittent fasting	Ntsapi CM, Loos B.	Exp Cell Res. 2021 Nov 15;408(2):112840. doi: 10.1016/j.yexcr.2021.112840. Epub 2021 Oct 9.	Ntsapi CM	Exp Cell Res	2021	2021-08-10			10.1016/j.yexcr.2021.112840
34609449	Intermittent Fasting	Li Z, Heber D.	JAMA. 2021 Oct 5;326(13):1338. doi: 10.1001/jama.2020.15140.	Li Z	JAMA	2021	2021-05-10			10.1001/jama.2020.15140
34579167	Gut Microbiota Predicts Healthy Late-Life Aging in Male Mice	Ke S, Mitchell SJ, MacArthur MR, Kane AE, Sinclair DA, Venable EM, Chadaideh KS, Carmody RN, Grodstein F, Mitchell JR, Liu Y.	Nutrients. 2021 Sep 21;13(9):3290. doi: 10.3390/nu13093290.	Ke S	Nutrients	2021	28/09/2021	PMC8467910		10.3390/nu13093290
34579097	Effects of Caloric Restriction and Rope-Skipping Exercise on Cardiometabolic Health: A Pilot Randomized Controlled Trial in Young Adults	Tang Z, Ming Y, Wu M, Jing J, Xu S, Li H, Zhu Y.	Nutrients. 2021 Sep 16;13(9):3222. doi: 10.3390/nu13093222.	Tang Z	Nutrients	2021	28/09/2021	PMC8467906		10.3390/nu13093222
34579125	The Gut Microbiota during a Behavioral Weight Loss Intervention	Stanislawski MA, Frank DN, Borengasser SJ, Ostendorf DM, Ir D, Jambal P, Bing K, Wayland L, Siebert JC, Bessesen DH, MacLean PS, Melanson EL, Catenacci VA.	Nutrients. 2021 Sep 18;13(9):3248. doi: 10.3390/nu13093248.	Stanislawski MA	Nutrients	2021	28/09/2021	PMC8471894		10.3390/nu13093248
34579145	Safety, Feasibility, and Effects of Short-Term Calorie Reduction during Induction Chemotherapy in Patients with Diffuse Large B-Cell Lymphoma: A Pilot Study	Tang CC, Huang TC, Tien FM, Lin JM, Yeh YC, Lee CY.	Nutrients. 2021 Sep 19;13(9):3268. doi: 10.3390/nu13093268.	Tang CC	Nutrients	2021	28/09/2021	PMC8471174		10.3390/nu13093268
34578973	The Effect of Caloric Restriction with and without n-3 PUFA Supplementation on Bone Turnover Markers in Blood of Subjects with Abdominal Obesity: A Randomized Placebo-Controlled Trial	Razny U, Goralska J, Calder PC, Gruca A, Childs CE, Kapusta M, Slowinska-Solnica K, Dembinska-Kiec A, Solnica B, Malczewska-Malec M.	Nutrients. 2021 Sep 2;13(9):3096. doi: 10.3390/nu13093096.	Razny U	Nutrients	2021	28/09/2021	PMC8465881		10.3390/nu13093096
34543722	Association between the FTO rs9939609 single nucleotide polymorphism and dietary adherence during a 2-year caloric restriction intervention: Exploratory analyses from CALERIE™ phase 2	Dorling JL, Belsky DW, Racette SB, Das SK, Ravussin E, Redman LM, Höchsmann C, Huffman KM, Kraus WE, Kobor MS, MacIsaac JL, Lin DTS, Corcoran DL, Martin CK.	Exp Gerontol. 2021 Nov;155:111555. doi: 10.1016/j.exger.2021.111555. Epub 2021 Sep 20.	Dorling JL	Exp Gerontol	2021	20/09/2021			10.1016/j.exger.2021.111555
34508090	A randomized controlled trial of pharmacist-led therapeutic carbohydrate and energy restriction in type 2 diabetes	Durrer C, McKelvey S, Singer J, Batterham AM, Johnson JD, Gudmundson K, Wortman J, Little JP.	Nat Commun. 2021 Sep 10;12(1):5367. doi: 10.1038/s41467-021-25667-4.	Durrer C	Nat Commun	2021	2021-11-09	PMC8433183		10.1038/s41467-021-25667-4
34494373	Intermittent Versus Continuous Energy Restriction for Weight Loss and Metabolic Improvement: A Meta-Analysis and Systematic Review	He S, Wang J, Zhang J, Xu J.	Obesity (Silver Spring). 2021 Jan;29(1):108-115. doi: 10.1002/oby.23023.	He S	Obesity (Silver Spring)	2021	2021-08-09			10.1002/oby.23023
34468618	The relationship between intermittent fasting and weight loss	Lo SC.	Rev Assoc Med Bras (1992). 2021 Aug 27;67(3):479. doi: 10.1590/1806-9282.20200858. eCollection 2021.	Lo SC	Rev Assoc Med Bras (1992)	2021	2021-01-09			10.1590/1806-9282.20200858
34469667	Editorial Comment: Effect of a low-calorie diet on 24-hour urinary parameters of obese adults with idiopathic calcium oxalate kidney stones	da Silva SB.	Int Braz J Urol. 2021 Nov-Dec;47(6):1148-1149. doi: 10.1590/S1677-5538.IBJU.2021.0140.1.	da Silva SB	Int Braz J Urol	2021	2021-01-09	PMC8486437		10.1590/S1677-5538.IBJU.2021.0140.1
34469666	Effect of a low-calorie diet on 24-hour urinary parameters of obese adults with idiopathic calcium oxalate kidney stones	Danilovic A, Marchini GS, Pucci ND, Coimbra B, Torricelli FCM, Batagello C, Vicentini FC, Srougi M, Nahas WC, Mazzucchi E.	Int Braz J Urol. 2021 Nov-Dec;47(6):1136-1147. doi: 10.1590/S1677-5538.IBJU.2021.0140.	Danilovic A	Int Braz J Urol	2021	2021-01-09	PMC8486438		10.1590/S1677-5538.IBJU.2021.0140
34444230	Very Low-Calorie Ketogenic Diet Modulates the Autonomic Nervous System Activity through Salivary Amylase in Obese Population Subjects	Polito R, Valenzano A, Scarinci A, Villano I, Monda M, Messina A, Cibelli G, Porro C, La Torre E, Pisanelli D, Moscatelli F, Messina G, Monda V.	Int J Environ Res Public Health. 2021 Aug 11;18(16):8475. doi: 10.3390/ijerph18168475.	Polito R	Int J Environ Res Public Health	2021	27/08/2021	PMC8393849		10.3390/ijerph18168475
34445036	Is the Activity-Based Anorexia Model a Reliable Method of Presenting Peripheral Clinical Features of Anorexia Nervosa?	Skowron K, Kurnik-Łucka M, Jurczyk M, Aleksandrovych V, Stach P, Dadański E, Kuśnierz-Cabala B, Jasiński K, Węglarz WP, Mazur P, Podlasz P, Wąsowicz K, Gil K.	Nutrients. 2021 Aug 21;13(8):2876. doi: 10.3390/nu13082876.	Skowron K	Nutrients	2021	27/08/2021	PMC8399373		10.3390/nu13082876
34445008	Bone Mineral Density Changes during Weight Regain following Weight Loss with and without Exercise	Serra MC, Ryan AS.	Nutrients. 2021 Aug 19;13(8):2848. doi: 10.3390/nu13082848.	Serra MC	Nutrients	2021	27/08/2021	PMC8400683		10.3390/nu13082848
34435551	Intermittent fasting: promising premises or broken promises?	Grosso G.	Int J Food Sci Nutr. 2021 Sep;72(6):721-722. doi: 10.1080/09637486.2021.1967301.	Grosso G	Int J Food Sci Nutr	2021	26/08/2021			10.1080/09637486.2021.1967301
34417460	O-GlcNAcylated p53 in the liver modulates hepatic glucose production	Gonzalez-Rellan MJ, Fondevila MF, Fernandez U, Rodríguez A, Varela-Rey M, Veyrat-Durebex C, Seoane S, Bernardo G, Lopitz-Otsoa F, Fernández-Ramos D, Bilbao J, Iglesias C, Novoa E, Ameneiro C, Senra A, Beiroa D, Cuñarro J, Dp Chantada-Vazquez M, Garcia-Vence M, Bravo SB, Da Silva Lima N, Porteiro B, Carneiro C, Vidal A, Tovar S, Müller TD, Ferno J, Guallar D, Fidalgo M, Sabio G, Herzig S, Yang WH,…	Nat Commun. 2021 Aug 20;12(1):5068. doi: 10.1038/s41467-021-25390-0.	Gonzalez-Rellan MJ	Nat Commun	2021	21/08/2021	PMC8379189		10.1038/s41467-021-25390-0
34371966	TIMER: A Clinical Study of Energy Restriction in Women with Gestational Diabetes Mellitus	Tsirou E, Grammatikopoulou MG, Nigdelis MP, Taousani E, Savvaki D, Assimakopoulos E, Tsapas A, Goulis DG.	Nutrients. 2021 Jul 18;13(7):2457. doi: 10.3390/nu13072457.	Tsirou E	Nutrients	2021	2021-10-08	PMC8308500		10.3390/nu13072457
34364265	Effect of the consumption of yacon flour and energy-restricted diet on glycation markers, and association between these markers and factors linked to obesity in adults with excess body weight: A randomized, double-blind, placebo-controlled clinical trial	Ribeiro PVM, Machado AM, da Silva NBM, de Oliveira LL, Alfenas RCG.	Nutrition. 2021 Nov-Dec;91-92:111395. doi: 10.1016/j.nut.2021.111395. Epub 2021 Jun 19.	Ribeiro PVM	Nutrition	2021	2021-07-08			10.1016/j.nut.2021.111395
34364236	Validity of the energy-restricted Mediterranean Diet Adherence Screener	Schröder H, Zomeño MD, Martínez-González MA, Salas-Salvadó J, Corella D, Vioque J, Romaguera D, Martínez JA, Tinahones FJ, Miranda JL, Estruch R, Bueno-Cavanillas A, Alonso Gómez AM, Tur JA, Warnberg J, Serra-Majem L, Martín V, Vázquez C, Lapetra J, Pintó X, Vidal J, Daimiel L, Gaforio JJ, Matía-Martín P, Ros E, Lassale C, Ruiz-Canela M, Babio N, Sorlí JV, García-Arellano A, Díaz-López A, Fitó M,…	Clin Nutr. 2021 Aug;40(8):4971-4979. doi: 10.1016/j.clnu.2021.06.030. Epub 2021 Jul 6.	Schröder H	Clin Nutr	2021	2021-07-08			10.1016/j.clnu.2021.06.030
34358822	Association between ketosis and metabolic adaptation at the level of resting metabolic rate	Martins C, Roekenes J, Hunter GR, Gower BA.	Clin Nutr. 2021 Aug;40(8):4824-4829. doi: 10.1016/j.clnu.2021.06.029. Epub 2021 Jul 6.	Martins C	Clin Nutr	2021	2021-06-08			10.1016/j.clnu.2021.06.029
34341379	Protein supplementation during an energy-restricted diet induces visceral fat loss and gut microbiota amino acid metabolism activation: a randomized trial	Bel Lassen P, Belda E, Prifti E, Dao MC, Specque F, Henegar C, Rinaldi L, Wang X, Kennedy SP, Zucker JD, Calame W, Lamarche B, Claus SP, Clément K.	Sci Rep. 2021 Aug 2;11(1):15620. doi: 10.1038/s41598-021-94916-9.	Bel Lassen P	Sci Rep	2021	2021-03-08	PMC8329187		10.1038/s41598-021-94916-9
34330839	Profile of John R. Speakman	Ravindran S.	Proc Natl Acad Sci U S A. 2021 Aug 3;118(31):e2111255118. doi: 10.1073/pnas.2111255118.	Ravindran S	Proc Natl Acad Sci U S A	2021	31/07/2021	PMC8346887		10.1073/pnas.2111255118
34326098	Factors associated with engagement and adherence to a low-energy diet to promote 10% weight loss in patients with clinically significant non-alcoholic fatty liver disease	Scragg J, Hallsworth K, Taylor G, Cassidy S, Haigh L, Boyle M, Anstee Q, McPherson S, Avery L.	BMJ Open Gastroenterol. 2021 Jul;8(1):e000678. doi: 10.1136/bmjgast-2021-000678.	Scragg J	BMJ Open Gastroenterol	2021	30/07/2021	PMC8323391		10.1136/bmjgast-2021-000678
34303715	Weight loss from caloric restriction vs Roux-en-Y gastric bypass surgery differentially regulates systemic and portal vein GDF15 levels in obese Zucker fatty rats	Seyfried F, Hoffmann A, Rullmann M, Schlegel N, Otto C, Hankir MK.	Physiol Behav. 2021 Oct 15;240:113534. doi: 10.1016/j.physbeh.2021.113534. Epub 2021 Jul 23.	Seyfried F	Physiol Behav	2021	25/07/2021			10.1016/j.physbeh.2021.113534
34274552	Eight weeks of intermittent fasting versus calorie restriction does not alter eating behaviors, mood, sleep quality, quality of life and cognitive performance in women with overweight	Teong XT, Hutchison AT, Liu B, Wittert GA, Lange K, Banks S, Heilbronn LK.	Nutr Res. 2021 Aug;92:32-39. doi: 10.1016/j.nutres.2021.06.006. Epub 2021 Jun 24.	Teong XT	Nutr Res	2021	18/07/2021			10.1016/j.nutres.2021.06.006
34264561	[Assessment of the professional community awareness about innovative diets prescribed for hypertension]	Vasil'ev YL, Kashtanov AD, Smetneva NS, Dydykina IS, Davydova SS.	Vopr Pitan. 2021;90(3):93-103. doi: 10.33029/0042-8833-2021-90-3-93-103. Epub 2021 May 17.	Vasil'ev YL	Vopr Pitan	2021	15/07/2021			10.33029/0042-8833-2021-90-3-93-103
34233884	Nutritional basis of type 2 diabetes remission	Taylor R, Ramachandran A, Yancy WS Jr, Forouhi NG.	BMJ. 2021 Jul 7;374:n1449. doi: 10.1136/bmj.n1449.	Taylor R	BMJ	2021	2021-08-07	PMC8261662		10.1136/bmj.n1449
34163067	Caloric restriction disrupts the microbiota and colonization resistance	von Schwartzenberg RJ, Bisanz JE, Lyalina S, Spanogiannopoulos P, Ang QY, Cai J, Dickmann S, Friedrich M, Liu SY, Collins SL, Ingebrigtsen D, Miller S, Turnbaugh JA, Patterson AD, Pollard KS, Mai K, Spranger J, Turnbaugh PJ.	Nature. 2021 Jul;595(7866):272-277. doi: 10.1038/s41586-021-03663-4. Epub 2021 Jun 23.	von Schwartzenberg RJ	Nature	2021	24/06/2021			10.1038/s41586-021-03663-4
34158363	Weight Loss by Low-Calorie Diet Versus Gastric Bypass Surgery in People With Diabetes Results in Divergent Brain Activation Patterns: A Functional MRI Study	Salem V, Demetriou L, Behary P, Alexiadou K, Scholtz S, Tharakan G, Miras AD, Purkayastha S, Ahmed AR, Bloom SR, Wall MB, Dhillo WS, Tan TM.	Diabetes Care. 2021 Aug;44(8):1842-1851. doi: 10.2337/dc20-2641. Epub 2021 Jun 22.	Salem V	Diabetes Care	2021	23/06/2021	PMC8385466		10.2337/dc20-2641
34159359	Effect of 2-year caloric restriction on organ and tissue size in nonobese 21- to 50-year-old adults in a randomized clinical trial: the CALERIE study	Shen W, Chen J, Zhou J, Martin CK, Ravussin E, Redman LM.	Am J Clin Nutr. 2021 Oct 4;114(4):1295-1303. doi: 10.1093/ajcn/nqab205.	Shen W	Am J Clin Nutr	2021	23/06/2021	PMC8645192		10.1093/ajcn/nqab205
34145977	Weight and weight control behaviors during long-term endometrial cancer survivorship: Results of the Laparoscopic Approach to Cancer of the Endometrium long-term follow-up study	Janda M, Forder P, Gebski V, Sandjia S, Armfield N, Obemair A.	Cancer Med. 2021 Jul;10(14):4896-4904. doi: 10.1002/cam4.4032. Epub 2021 Jun 18.	Janda M	Cancer Med	2021	19/06/2021	PMC8290251		10.1002/cam4.4032
34144920	The Effect of Meal Replacement on Weight Loss According to Calorie-Restriction Type and Proportion of Energy Intake: A Systematic Review and Meta-Analysis of Randomized Controlled Trials	Min J, Kim SY, Shin IS, Park YB, Lim YW.	J Acad Nutr Diet. 2021 Aug;121(8):1551-1564.e3. doi: 10.1016/j.jand.2021.05.001. Epub 2021 Jun 16.	Min J	J Acad Nutr Diet	2021	19/06/2021			10.1016/j.jand.2021.05.001
34138917	Dietary adherence and program attrition during a severely energy-restricted diet among people with complex class III obesity: A qualitative exploration	Maston G, Franklin J, Hocking S, Swinbourne J, Gibson A, Manson E, Sainsbury A, Markovic T.	PLoS One. 2021 Jun 17;16(6):e0253127. doi: 10.1371/journal.pone.0253127. eCollection 2021.	Maston G	PLoS One	2021	17/06/2021	PMC8211265		10.1371/journal.pone.0253127
34135111	A randomized controlled trial to isolate the effects of fasting and energy restriction on weight loss and metabolic health in lean adults	Templeman I, Smith HA, Chowdhury E, Chen YC, Carroll H, Johnson-Bonson D, Hengist A, Smith R, Creighton J, Clayton D, Varley I, Karagounis LG, Wilhelmsen A, Tsintzas K, Reeves S, Walhin JP, Gonzalez JT, Thompson D, Betts JA.	Sci Transl Med. 2021 Jun 16;13(598):eabd8034. doi: 10.1126/scitranslmed.abd8034.	Templeman I	Sci Transl Med	2021	17/06/2021			10.1126/scitranslmed.abd8034
34134143	Are metabolic adaptations to weight changes an artefact?	Müller MJ, Heymsfield SB, Bosy-Westphal A.	Am J Clin Nutr. 2021 Oct 4;114(4):1386-1395. doi: 10.1093/ajcn/nqab184.	Müller MJ	Am J Clin Nutr	2021	16/06/2021			10.1093/ajcn/nqab184
34114650	Lifestyle modifications for nonalcohol-related fatty liver disease: a network meta-analysis	Buzzetti E, Linden A, Best LM, Madden AM, Roberts D, Chase TJG, Freeman SC, Cooper NJ, Sutton AJ, Fritche D, Milne EJ, Wright K, Pavlov CS, Davidson BR, Tsochatzis E, Gurusamy KS.	Cochrane Database Syst Rev. 2021 Jun 11;6(6):CD013156. doi: 10.1002/14651858.CD013156.pub2.	Buzzetti E	Cochrane Database Syst Rev	2021	2021-11-06	PMC8193812		10.1002/14651858.CD013156.pub2
34067055	Fasting: How to Guide	Attinà A, Leggeri C, Paroni R, Pivari F, Dei Cas M, Mingione A, Dri M, Marchetti M, Di Renzo L.	Nutrients. 2021 May 7;13(5):1570. doi: 10.3390/nu13051570.	Attinà A	Nutrients	2021	2021-02-06	PMC8151159		10.3390/nu13051570
34074289	Effect of probiotic supplementation along with calorie restriction on metabolic endotoxemia, and inflammation markers in coronary artery disease patients: a double blind placebo controlled randomized clinical trial	Moludi J, Kafil HS, Qaisar SA, Gholizadeh P, Alizadeh M, Vayghyan HJ.	Nutr J. 2021 Jun 1;20(1):47. doi: 10.1186/s12937-021-00703-7.	Moludi J	Nutr J	2021	2021-02-06	PMC8170788		10.1186/s12937-021-00703-7
34068089	Iron Beats Electricity: Resistance Training but Not Whole-Body Electromyostimulation Improves Cardiometabolic Health in Obese Metabolic Syndrome Patients during Caloric Restriction-A Randomized-Controlled Study	Reljic D, Herrmann HJ, Neurath MF, Zopf Y.	Nutrients. 2021 May 13;13(5):1640. doi: 10.3390/nu13051640.	Reljic D	Nutrients	2021	2021-02-06	PMC8152778		10.3390/nu13051640
34067475	Modulation of Endocannabinoids by Caloric Restriction Is Conserved in Mice but Is Not Required for Protection from Acute Kidney Injury	Hoyer-Allo KJR, Späth MR, Hanssen R, Johnsen M, Brodesser S, Kaufmann K, Kiefer K, Koehler FC, Göbel H, Kubacki T, Grundmann F, Schermer B, Brüning J, Benzing T, Burst V, Müller RU.	Int J Mol Sci. 2021 May 22;22(11):5485. doi: 10.3390/ijms22115485.	Hoyer-Allo KJR	Int J Mol Sci	2021	2021-02-06	PMC8196977		10.3390/ijms22115485
34073587	Adiponectin Gene Variant rs3774261, Effects on Lipid Profile and Adiponectin Levels after a High Polyunsaturated Fat Hypocaloric Diet with Mediterranean Pattern	de Luis Roman DA, Primo D, IZaola O, Gómez E, López JJ.	Nutrients. 2021 May 26;13(6):1811. doi: 10.3390/nu13061811.	de Luis Roman DA	Nutrients	2021	2021-02-06	PMC8229318		10.3390/nu13061811
34068687	Sexual Dimorphism in Body Weight Loss, Improvements in Cardiometabolic Risk Factors and Maintenance of Beneficial Effects 6 Months after a Low-Calorie Diet: Results from the Randomized Controlled DiOGenes Trial	Trouwborst I, Goossens GH, Astrup A, Saris WHM, Blaak EE.	Nutrients. 2021 May 10;13(5):1588. doi: 10.3390/nu13051588.	Trouwborst I	Nutrients	2021	2021-02-06	PMC8151806		10.3390/nu13051588
34073163	Comparison of Resveratrol Supplementation and Energy Restriction Effects on Sympathetic Nervous System Activity and Vascular Reactivity: A Randomized Clinical Trial	Gonçalinho GHF, Roggerio A, Goes MFDS, Avakian SD, Leal DP, Strunz CMC, Mansur AP.	Molecules. 2021 May 26;26(11):3168. doi: 10.3390/molecules26113168.	Gonçalinho GHF	Molecules	2021	2021-02-06	PMC8199010		10.3390/molecules26113168
34057907	mTORC1 is also involved in longevity between species	Barja G, Pamplona R.	Aging (Albany NY). 2021 May 29;13(11):14544-14545. doi: 10.18632/aging.203129. Epub 2021 May 29.	Barja G	Aging (Albany NY)	2021	31/05/2021	PMC8221316		10.18632/aging.203129
34028197	Current preoperative strategies applied in the Dutch bariatric centers: A national survey	Kolen AM, Romeijn MM, Holthuijsen DDB, Janssen L, Greve JWM, Leclercq WKG, van Dielen FMH.	Clin Obes. 2021 Aug;11(4):e12461. doi: 10.1111/cob.12461. Epub 2021 May 24.	Kolen AM	Clin Obes	2021	24/05/2021	PMC8365720		10.1111/cob.12461
34020445	Effect on gut microbiota of a 1-y lifestyle intervention with Mediterranean diet compared with energy-reduced Mediterranean diet and physical activity promotion: PREDIMED-Plus Study	Muralidharan J, Moreno-Indias I, Bulló M, Lopez JV, Corella D, Castañer O, Vidal J, Atzeni A, Fernandez-García JC, Torres-Collado L, Fernández-Carrión R, Fito M, Olbeyra R, Gomez-Perez AM, Galiè S, Bernal-López MR, Martinez-Gonzalez MA, Salas-Salvadó J, Tinahones FJ.	Am J Clin Nutr. 2021 Sep 1;114(3):1148-1158. doi: 10.1093/ajcn/nqab150.	Muralidharan J	Am J Clin Nutr	2021	21/05/2021	PMC8408861		10.1093/ajcn/nqab150
33992572	An update to the study protocol for a randomized controlled trial comparing daily calorie restriction versus intermittent fasting to improve glycaemia in individuals at increased risk of developing type 2 diabetes	Teong XT, Liu K, Hutchison AT, Liu B, Feinle-Bisset C, Wittert GA, Lange K, Vincent AD, Heilbronn LK.	Obes Res Clin Pract. 2021 May-Jun;15(3):306. doi: 10.1016/j.orcp.2021.04.009. Epub 2021 May 13.	Teong XT	Obes Res Clin Pract	2021	16/05/2021			10.1016/j.orcp.2021.04.009
33975472	Transgenerational fitness effects of lifespan extension by dietary restriction in Caenorhabditis elegans	Ivimey-Cook ER, Sales K, Carlsson H, Immler S, Chapman T, Maklakov AA.	Proc Biol Sci. 2021 May 12;288(1950):20210701. doi: 10.1098/rspb.2021.0701. Epub 2021 May 12.	Ivimey-Cook ER	Proc Biol Sci	2021	2021-12-05	PMC8113902		10.1098/rspb.2021.0701
33975734	Effect of intermittent and continuous caloric restriction on Sirtuin1 concentration depends on sex and body mass index	Opstad TB, Sundfør T, Tonstad S, Seljeflot I.	Nutr Metab Cardiovasc Dis. 2021 Jun 7;31(6):1871-1878. doi: 10.1016/j.numecd.2021.03.005. Epub 2021 Mar 19.	Opstad TB	Nutr Metab Cardiovasc Dis	2021	2021-12-05			10.1016/j.numecd.2021.03.005
33958571	A 41-Year-Old Woman with Excessive Fat of the Lower Body Since Puberty with Progression to Swollen Ankles and Feet Despite Caloric Restriction, Due to Lipedema and Protein-Calorie Malnutrition: A Case of Stage 3 Lipedema	Wright TF, Herbst KL.	Am J Case Rep. 2021 May 7;22:e930306. doi: 10.12659/AJCR.930306.	Wright TF	Am J Case Rep	2021	2021-07-05	PMC8112463		10.12659/AJCR.930306
33946428	An Intermittent Fasting Mimicking Nutrition Bar Extends Physiologic Ketosis in Time Restricted Eating: A Randomized, Controlled, Parallel-Arm Study	Huang AW, Wei M, Caputo S, Wilson ML, Antoun J, Hsu WC.	Nutrients. 2021 Apr 30;13(5):1523. doi: 10.3390/nu13051523.	Huang AW	Nutrients	2021	2021-05-05	PMC8147148		10.3390/nu13051523
33951361	Healthy Weight Loss Maintenance with Exercise, Liraglutide, or Both Combined	Lundgren JR, Janus C, Jensen SBK, Juhl CR, Olsen LM, Christensen RM, Svane MS, Bandholm T, Bojsen-Møller KN, Blond MB, Jensen JB, Stallknecht BM, Holst JJ, Madsbad S, Torekov SS.	N Engl J Med. 2021 May 6;384(18):1719-1730. doi: 10.1056/NEJMoa2028198.	Lundgren JR	N Engl J Med	2021	2021-05-05			10.1056/NEJMoa2028198
33916366	Adherence and Dietary Composition during Intermittent vs. Continuous Calorie Restriction: Follow-Up Data from a Randomized Controlled Trial in Adults with Overweight or Obesity	Pannen ST, Maldonado SG, Nonnenmacher T, Sowah SA, Gruner LF, Watzinger C, Nischwitz K, Ulrich CM, Kaaks R, Schübel R, Grafetstätter M, Kühn T.	Nutrients. 2021 Apr 5;13(4):1195. doi: 10.3390/nu13041195.	Pannen ST	Nutrients	2021	30/04/2021	PMC8067073		10.3390/nu13041195
33920153	The Ability of Exercise to Mitigate Caloric Restriction-Induced Bone Loss in Older Adults: A Structured Review of RCTs and Narrative Review of Exercise-Induced Changes in Bone Biomarkers	Wherry SJ, Miller RM, Jeong SH, Beavers KM.	Nutrients. 2021 Apr 10;13(4):1250. doi: 10.3390/nu13041250.	Wherry SJ	Nutrients	2021	30/04/2021	PMC8070587		10.3390/nu13041250
33916828	Short-Term Calorie Restriction Maintains Plasma Insulin Concentrations along with a Reduction in Hepatic Insulin-Degrading Enzyme Levels in db/db Mice	Nonaka Y, Takeda R, Kano Y, Hoshino D.	Nutrients. 2021 Apr 3;13(4):1190. doi: 10.3390/nu13041190.	Nonaka Y	Nutrients	2021	30/04/2021	PMC8065522		10.3390/nu13041190
33925808	Effect of Weight Loss by Low-Calorie Diet on Cardiovascular Health in Type 2 Diabetes: An Interventional Cohort Study	Melhem S, Steven S, Taylor R, Al-Mrabeh A.	Nutrients. 2021 Apr 26;13(5):1465. doi: 10.3390/nu13051465.	Melhem S	Nutrients	2021	30/04/2021	PMC8146720		10.3390/nu13051465
33914421	[Intermittent fasting in science and practice; what are the effects on weight and cardiometabolic health?]	Berk KAC, van der Voorn B, van Rossum EFC.	Ned Tijdschr Geneeskd. 2021 Apr 15;165:D5284.	Berk KAC	Ned Tijdschr Geneeskd	2021	29/04/2021
33894117	Effect of Calorie Restriction and Exercise on Type 2 Diabetes	Shakoor H, Apostolopoulos V, Feehan J, Ali HI, Ismail LC, Al Dhaheri ASOS, Stojanovska L.	Pril (Makedon Akad Nauk Umet Odd Med Nauki). 2021 Apr 23;42(1):109-126. doi: 10.2478/prilozi-2021-0010.	Shakoor H	Pril (Makedon Akad Nauk Umet Odd Med Nauki)	2021	24/04/2021			10.2478/prilozi-2021-0010
33879240	The effects of exercise and low-calorie diets compared with low-calorie diets alone on health: a protocol for systematic reviews and meta-analyses of controlled clinical trials	Beigrezaei S, Yazdanpanah Z, Soltani S, Rajaie SH, Mohseni-Takalloo S, Zohrabi T, Kaviani M, Forbes SC, Baker JS, Salehi-Abargouei A.	Syst Rev. 2021 Apr 20;10(1):120. doi: 10.1186/s13643-021-01669-7.	Beigrezaei S	Syst Rev	2021	21/04/2021	PMC8059276		10.1186/s13643-021-01669-7
33853407	Much ado about eating: Intermittent fasting and post-stroke neuroprotection	Vemuganti R, Arumugam TV.	J Cereb Blood Flow Metab. 2021 Jul;41(7):1791-1793. doi: 10.1177/0271678X211009362. Epub 2021 Apr 14.	Vemuganti R	J Cereb Blood Flow Metab	2021	15/04/2021	PMC8221776		10.1177/0271678X211009362
33857309	SGLT2 Inhibitors as Calorie Restriction Mimetics: Insights on Longevity Pathways and Age-Related Diseases	Hoong CWS, Chua MWJ.	Endocrinology. 2021 Aug 1;162(8):bqab079. doi: 10.1210/endocr/bqab079.	Hoong CWS	Endocrinology	2021	15/04/2021			10.1210/endocr/bqab079
33847668	The influence of fasting and caloric restriction on inflammation levels in humans: A protocol for systematic review and meta analysis	Zhou RH, Wang Q, Hu XM, Liu M, Zhang AR.	Medicine (Baltimore). 2021 Apr 16;100(15):e25509. doi: 10.1097/MD.0000000000025509.	Zhou RH	Medicine (Baltimore)	2021	13/04/2021	PMC8052001		10.1097/MD.0000000000025509
33846756	Three cases of euglycaemic diabetic ketoacidosis related to the use of sodium-glucoseco-transporter-2 inhibitors and calorie restriction	Tan KT.	Singapore Med J. 2021 Mar;62(3):153-154. doi: 10.11622/smedj.2021029.	Tan KT	Singapore Med J	2021	13/04/2021	PMC8027152		10.11622/smedj.2021029
33832095	Maternal and neonatal outcomes after energy-restricted diet for women with gestational diabetes mellitus: A systematic review and meta-analysis of randomized controlled trials	Feng Y, Zhao Z, Fu D, Gao W, Zhang F.	Medicine (Baltimore). 2021 Apr 9;100(14):e25279. doi: 10.1097/MD.0000000000025279.	Feng Y	Medicine (Baltimore)	2021	2021-09-04	PMC8036084		10.1097/MD.0000000000025279
33831950	The effect of intermittent energy restriction on weight loss and diabetes risk markers in women with a history of gestational diabetes: a 12-month randomized control trial	Gray KL, Clifton PM, Keogh JB.	Am J Clin Nutr. 2021 Aug 2;114(2):794-803. doi: 10.1093/ajcn/nqab058.	Gray KL	Am J Clin Nutr	2021	2021-08-04			10.1093/ajcn/nqab058
33810414	High-Protein or Low Glycemic Index Diet-Which Energy-Restricted Diet Is Better to Start a Weight Loss Program?	Waliłko E, Napierała M, Bryśkiewicz M, Fronczyk A, Majkowska L.	Nutrients. 2021 Mar 26;13(4):1086. doi: 10.3390/nu13041086.	Waliłko E	Nutrients	2021	2021-03-04	PMC8066419		10.3390/nu13041086
33810960	Changes in the profile of circulating HDL subfractions in severe obese adolescents following a weight reduction program	Montero D, Dutheil F, Walther G, Perez-Martin A, Soto-Esclapez L, Vinet A, Roche E.	Nutr Metab Cardiovasc Dis. 2021 May 6;31(5):1586-1593. doi: 10.1016/j.numecd.2021.01.025. Epub 2021 Feb 10.	Montero D	Nutr Metab Cardiovasc Dis	2021	2021-03-04			10.1016/j.numecd.2021.01.025
33795221	Dietary gluten avoidance in Canada: a cross-sectional study using survey data	Mudryj A, Waugh A, Slater J, Duerksen DR, Bernstein CN, Riediger ND.	CMAJ Open. 2021 Apr 1;9(2):E317-E323. doi: 10.9778/cmajo.20200082. Print 2021 Apr-Jun.	Mudryj A	CMAJ Open	2021	2021-02-04	PMC8034255		10.9778/cmajo.20200082
33743284	Effects of calorie restricted low carbohydrate high fat ketogenic vs. non-ketogenic diet on strength, body-composition, hormonal and lipid profile in trained middle-aged men	Vidić V, Ilić V, Toskić L, Janković N, Ugarković D.	Clin Nutr. 2021 Apr;40(4):1495-1502. doi: 10.1016/j.clnu.2021.02.028. Epub 2021 Feb 26.	Vidić V	Clin Nutr	2021	20/03/2021			10.1016/j.clnu.2021.02.028
33719918	Rationale and Design for a Higher (Dairy) Protein Weight Loss Intervention That Promotes Muscle Quality and Bone Health in Older Adults with Obesity: A Randomized, Controlled Pilot Study	Miller MG, Porter Starr KN, Rincker J, Orenduff MC, McDonald SR, Pieper CF, Fruik AR, Lyles KW, Bales CW.	J Nutr Gerontol Geriatr. 2021 Apr-Jun;40(2-3):150-170. doi: 10.1080/21551197.2021.1896615. Epub 2021 Mar 13.	Miller MG	J Nutr Gerontol Geriatr	2021	15/03/2021			10.1080/21551197.2021.1896615
33652834	Very-Low-Calorie Ketogenic Diet as a Safe and Valuable Tool for Long-Term Glycemic Management in Patients with Obesity and Type 2 Diabetes	Moriconi E, Camajani E, Fabbri A, Lenzi A, Caprio M.	Nutrients. 2021 Feb 26;13(3):758. doi: 10.3390/nu13030758.	Moriconi E	Nutrients	2021	2021-03-03	PMC7996853		10.3390/nu13030758
33647370	Caloric Restriction Impairs Regulatory T cells Within the Tumor Microenvironment After Radiation and Primes Effector T cells	Manukian G, Kivolowitz C, DeAngelis T, Shastri AA, Savage JE, Camphausen K, Rodeck U, Zarif JC, Simone NL.	Int J Radiat Oncol Biol Phys. 2021 Aug 1;110(5):1341-1349. doi: 10.1016/j.ijrobp.2021.02.029. Epub 2021 Feb 26.	Manukian G	Int J Radiat Oncol Biol Phys	2021	2021-01-03	PMC8286289	NIHMS1677926	10.1016/j.ijrobp.2021.02.029
33630880	A 1-week diet break improves muscle endurance during an intermittent dieting regime in adult athletes: A pre-specified secondary analysis of the ICECAP trial	Peos JJ, Helms ER, Fournier PA, Krieger J, Sainsbury A.	PLoS One. 2021 Feb 25;16(2):e0247292. doi: 10.1371/journal.pone.0247292. eCollection 2021.	Peos JJ	PLoS One	2021	25/02/2021	PMC7906362		10.1371/journal.pone.0247292
33629506	Sex, Food, and the Gut Microbiota: Disparate Response to Caloric Restriction Diet with Fiber Supplementation in Women and Men	Benítez-Páez A, Hess AL, Krautbauer S, Liebisch G, Christensen L, Hjorth MF, Larsen TM, Sanz Y; MyNewGut consortium.	Mol Nutr Food Res. 2021 Apr;65(8):e2000996. doi: 10.1002/mnfr.202000996. Epub 2021 Mar 9.	Benítez-Páez A	Mol Nutr Food Res	2021	25/02/2021			10.1002/mnfr.202000996
33608718	Pediatric weight management, dietary restraint, dieting, and eating disorder risk: a systematic review	House ET, Gow ML, Lister NB, Baur LA, Garnett SP, Paxton SJ, Jebeile H.	Nutr Rev. 2021 Sep 7;79(10):1114-1133. doi: 10.1093/nutrit/nuaa127.	House ET	Nutr Rev	2021	20/02/2021			10.1093/nutrit/nuaa127
33587549	Continuous versus Intermittent Dieting for Fat Loss and Fat-Free Mass Retention in Resistance-trained Adults: The ICECAP Trial	Peos JJ, Helms ER, Fournier PA, Ong J, Hall C, Krieger J, Sainsbury A.	Med Sci Sports Exerc. 2021 Aug 1;53(8):1685-1698. doi: 10.1249/MSS.0000000000002636.	Peos JJ	Med Sci Sports Exerc	2021	15/02/2021			10.1249/MSS.0000000000002636
33572489	Greater Loss of Central Adiposity from Low-Carbohydrate versus Low-Fat Diet in Middle-Aged Adults with Overweight and Obesity	Garr Barry V, Stewart M, Soleymani T, Desmond RA, Goss AM, Gower BA.	Nutrients. 2021 Jan 31;13(2):475. doi: 10.3390/nu13020475.	Garr Barry V	Nutrients	2021	2021-12-02	PMC7911139		10.3390/nu13020475
33560408	Of Mice and Men: Impacts of Calorie Restriction on Metabolomics of the Cerebellum	García-Flores LA, Green CL.	J Gerontol A Biol Sci Med Sci. 2021 Mar 31;76(4):547-551. doi: 10.1093/gerona/glab041.	García-Flores LA	J Gerontol A Biol Sci Med Sci	2021	2021-09-02	PMC8427710		10.1093/gerona/glab041
33549453	Effect of caloric restriction with or without physical activity on body composition and epicardial fat in type 2 diabetic patients: A pilot randomized controlled trial	Leroux-Stewart J, Elisha B, Tagougui S, Suppère C, Bernard S, Mircescu H, Desjardin K, Messier V, Iacobellis G, Rabasa-Lhoret R.	Nutr Metab Cardiovasc Dis. 2021 Mar 10;31(3):921-929. doi: 10.1016/j.numecd.2020.11.005. Epub 2020 Nov 13.	Leroux-Stewart J	Nutr Metab Cardiovasc Dis	2021	2021-07-02			10.1016/j.numecd.2020.11.005
33512717	Intermittent fasting for the prevention of cardiovascular disease	Allaf M, Elghazaly H, Mohamed OG, Fareen MFK, Zaman S, Salmasi AM, Tsilidis K, Dehghan A.	Cochrane Database Syst Rev. 2021 Jan 29;1(1):CD013496. doi: 10.1002/14651858.CD013496.pub2.	Allaf M	Cochrane Database Syst Rev	2021	29/01/2021	PMC8092432		10.1002/14651858.CD013496.pub2
33498640	The Feasibility of Using Computrition Software for Nutrition Research-A Pilot Study	Millar CL, Cohen A, Juraschek SP, Foley A, Shtivelman M, Mukamal KJ, Sahni S.	Nutrients. 2021 Jan 23;13(2):329. doi: 10.3390/nu13020329.	Millar CL	Nutrients	2021	27/01/2021	PMC7911746		10.3390/nu13020329
33498461	Higher Lipopolysaccharide Binding Protein and Chemerin Concentrations Were Associated with Metabolic Syndrome Features in Pediatric Subjects with Abdominal Obesity during a Lifestyle Intervention	Marti A, Martínez I, Ojeda-Rodríguez A, Azcona-Sanjulian MC.	Nutrients. 2021 Jan 20;13(2):289. doi: 10.3390/nu13020289.	Marti A	Nutrients	2021	27/01/2021	PMC7909441		10.3390/nu13020289
33495474	Time-restricted feeding normalizes hyperinsulinemia to inhibit breast cancer in obese postmenopausal mouse models	Das M, Ellies LG, Kumar D, Sauceda C, Oberg A, Gross E, Mandt T, Newton IG, Kaur M, Sears DD, Webster NJG.	Nat Commun. 2021 Jan 25;12(1):565. doi: 10.1038/s41467-020-20743-7.	Das M	Nat Commun	2021	26/01/2021	PMC7835248		10.1038/s41467-020-20743-7
33485708	An individualized food-based nutrition intervention reduces visceral and total body fat while preserving skeletal muscle mass in breast cancer patients under antineoplastic treatment	Limon-Miro AT, Valencia ME, Lopez-Teros V, Alemán-Mateo H, Méndez-Estrada RO, Pacheco-Moreno BI, Astiazaran-Garcia H.	Clin Nutr. 2021 Jun;40(6):4394-4403. doi: 10.1016/j.clnu.2021.01.006. Epub 2021 Jan 9.	Limon-Miro AT	Clin Nutr	2021	24/01/2021			10.1016/j.clnu.2021.01.006
33479375	Caloric restriction reduces sympathetic activity similar to beta-blockers but conveys additional mitochondrio-protective effects in aged myocardium	Niemann B, Li L, Simm A, Molenda N, Kockskämper J, Boening A, Rohrbach S.	Sci Rep. 2021 Jan 21;11(1):1931. doi: 10.1038/s41598-021-81438-7.	Niemann B	Sci Rep	2021	22/01/2021	PMC7820280		10.1038/s41598-021-81438-7
33463673	Perspective: Time-Restricted Eating Compared with Caloric Restriction: Potential Facilitators and Barriers of Long-Term Weight Loss Maintenance	O'Connor SG, Boyd P, Bailey CP, Shams-White MM, Agurs-Collins T, Hall K, Reedy J, Sauter ER, Czajkowski SM.	Adv Nutr. 2021 Mar 31;12(2):325-333. doi: 10.1093/advances/nmaa168.	O'Connor SG	Adv Nutr	2021	19/01/2021	PMC8009736		10.1093/advances/nmaa168
33431344	Investigating IGF-II and IGF2R serum markers as predictors of body weight loss following an 8-week acute weight loss intervention: PREVIEW sub-study	Lee KL, Silvestre MP, AlSaud NH, Fogelholm M, Raben A, Poppitt SD.	Obes Res Clin Pract. 2021 Jan-Feb;15(1):42-48. doi: 10.1016/j.orcp.2020.12.007. Epub 2021 Jan 9.	Lee KL	Obes Res Clin Pract	2021	2021-12-01			10.1016/j.orcp.2020.12.007
33420472	Effect of a nut-enriched low-calorie diet on body weight and selected markers of inflammation in overweight and obese stable coronary artery disease patients: a randomized controlled study	Ghanavati M, Hosseinabadi SM, Parsa SA, Safi M, Emamat H, Nasrollahzadeh J.	Eur J Clin Nutr. 2021 Jul;75(7):1099-1108. doi: 10.1038/s41430-020-00819-9. Epub 2021 Jan 8.	Ghanavati M	Eur J Clin Nutr	2021	2021-09-01			10.1038/s41430-020-00819-9
33420673	Effect of Fasting-Mimicking Diet or Continuous Energy Restriction on Weight Loss, Body Composition, and Appetite-Regulating Hormones Among Metabolically Healthy Women with Obesity: a Randomized Controlled, Parallel Trial	Sadeghian M, Hosseini SA, Zare Javid A, Ahmadi Angali K, Mashkournia A.	Obes Surg. 2021 May;31(5):2030-2039. doi: 10.1007/s11695-020-05202-y. Epub 2021 Jan 9.	Sadeghian M	Obes Surg	2021	2021-09-01			10.1007/s11695-020-05202-y
33420549	Increasing whole-body energetic stress does not augment fasting-induced changes in human skeletal muscle	Islam H, Amato A, Bonafiglia JT, Rahman FA, Preobrazenski N, Ma A, Simpson CA, Quadrilatero J, Gurd BJ.	Pflugers Arch. 2021 Feb;473(2):241-252. doi: 10.1007/s00424-020-02499-7. Epub 2021 Jan 8.	Islam H	Pflugers Arch	2021	2021-09-01			10.1007/s00424-020-02499-7
33404812	Effects of synbiotic supplementation on serum adiponectin and inflammation status of overweight and obese breast cancer survivors: a randomized, triple-blind, placebo-controlled trial	Raji Lahiji M, Zarrati M, Najafi S, Yazdani B, Cheshmazar E, Razmpoosh E, Janani L, Raji Lahiji M, Shidfar F.	Support Care Cancer. 2021 Jul;29(7):4147-4157. doi: 10.1007/s00520-020-05926-8. Epub 2021 Jan 6.	Raji Lahiji M	Support Care Cancer	2021	2021-06-01			10.1007/s00520-020-05926-8
33406285	Brief formula low-energy-diet for relapse management during weight loss maintenance in the Diabetes Remission Clinical Trial (DiRECT)	Brosnahan N, Leslie W, McCombie L, Barnes A, Thom G, McConnachie A, Messow CM, Sattar N, Taylor R, Lean MEJ.	J Hum Nutr Diet. 2021 Jun;34(3):472-479. doi: 10.1111/jhn.12839. Epub 2021 Jan 6.	Brosnahan N	J Hum Nutr Diet	2021	2021-06-01			10.1111/jhn.12839
33389084	Ten days of complete fasting affected subjective sensations but not cognitive abilities in healthy adults	Yang C, Ma Q, Zhang H, Wu F, Wu M, Yang C, Chen Y, Xiong J, Liu W, Wang H, Wu R, Dai Z, Li Y.	Eur J Nutr. 2021 Aug;60(5):2747-2758. doi: 10.1007/s00394-020-02450-7. Epub 2021 Jan 3.	Yang C	Eur J Nutr	2021	2021-03-01			10.1007/s00394-020-02450-7
33374554	Calorie-Restricted Mediterranean and Low-Fat Diets Affect Fatty Acid Status in Individuals with Nonalcoholic Fatty Liver Disease	Ristic-Medic D, Kovacic M, Takic M, Arsic A, Petrovic S, Paunovic M, Jovicic M, Vucic V.	Nutrients. 2020 Dec 23;13(1):15. doi: 10.3390/nu13010015.	Ristic-Medic D	Nutrients	2020	30/12/2020	PMC7822481		10.3390/nu13010015
33358713	Does the weight loss efficacy of alternate day fasting differ according to sex and menopausal status?	Lin S, Lima Oliveira M, Gabel K, Kalam F, Cienfuegos S, Ezpeleta M, Bhutani S, Varady KA.	Nutr Metab Cardiovasc Dis. 2021 Feb 8;31(2):641-649. doi: 10.1016/j.numecd.2020.10.018. Epub 2020 Oct 31.	Lin S	Nutr Metab Cardiovasc Dis	2021	28/12/2020	PMC7887029	NIHMS1642711	10.1016/j.numecd.2020.10.018
33336232	Nutrition to Prevent or Treat Cognitive Impairment in Older Adults: A GRADE Recommendation	Buckinx F, Aubertin-Leheudre M.	J Prev Alzheimers Dis. 2021;8(1):110-116. doi: 10.14283/jpad.2020.40.	Buckinx F	J Prev Alzheimers Dis	2021	18/12/2020			10.14283/jpad.2020.40
33315090	Obesity Genes and Weight Loss During Lifestyle Intervention in Children With Obesity	Heitkamp M, Siegrist M, Molnos S, Brandmaier S, Wahl S, Langhof H, Grallert H, Halle M.	JAMA Pediatr. 2021 Jan 1;175(1):e205142. doi: 10.1001/jamapediatrics.2020.5142. Epub 2021 Jan 4.	Heitkamp M	JAMA Pediatr	2021	14/12/2020	PMC7737153		10.1001/jamapediatrics.2020.5142
33302500	Food Timing, Circadian Rhythm and Chrononutrition: A Systematic Review of Time-Restricted Eating's Effects on Human Health	Adafer R, Messaadi W, Meddahi M, Patey A, Haderbache A, Bayen S, Messaadi N.	Nutrients. 2020 Dec 8;12(12):3770. doi: 10.3390/nu12123770.	Adafer R	Nutrients	2020	2020-11-12	PMC7763532		10.3390/nu12123770
33305526	Intermittent and continuous energy restriction result in similar weight loss, weight loss maintenance, and body composition changes in a 6 month randomized pilot study	Steger FL, Donnelly JE, Hull HR, Li X, Hu J, Sullivan DK.	Clin Obes. 2021 Apr;11(2):e12430. doi: 10.1111/cob.12430. Epub 2020 Dec 10.	Steger FL	Clin Obes	2021	2020-11-12			10.1111/cob.12430
33283400	Choosing and following a very low calorie diet program in Australia: A quasi-mixed methods study to understand experiences, barriers, and facilitators in a self-initiated environment	Roesler A, Marshall S, Rahimi-Ardabili H, Duve E, Abbott K, Blumfield M, Cassettari T, Fayet-Moore F.	Nutr Diet. 2021 Apr;78(2):202-217. doi: 10.1111/1747-0080.12645. Epub 2020 Dec 6.	Roesler A	Nutr Diet	2021	2020-07-12			10.1111/1747-0080.12645
33267558	Impact of an 8-Year Intensive Lifestyle Intervention on an Index of Multimorbidity	Espeland MA, Gaussoin SA, Bahnson J, Vaughan EM, Knowler WC, Simpson FR, Hazuda HP, Johnson KC, Munshi MN, Coday M, Pi-Sunyer X.	J Am Geriatr Soc. 2020 Oct;68(10):2249-2256. doi: 10.1111/jgs.16672. Epub 2020 Jul 17.	Espeland MA	J Am Geriatr Soc	2020	2020-03-12	PMC8299520	NIHMS1721375	10.1111/jgs.16672
33266499	The Efficacy of an Energy-Restricted Anti-Inflammatory Diet for the Management of Obesity in Younger Adults	Kenđel Jovanović G, Mrakovcic-Sutic I, Pavičić Žeželj S, Šuša B, Rahelić D, Klobučar Majanović S.	Nutrients. 2020 Nov 22;12(11):3583. doi: 10.3390/nu12113583.	Kenđel Jovanović G	Nutrients	2020	2020-03-12	PMC7700374		10.3390/nu12113583
33255361	The Influence of Response Inhibition Training on Food Consumption and Implicit Attitudes toward Food among Female Restrained Eaters	Weinbach N, Keha E, Leib H, Kalanthroff E.	Nutrients. 2020 Nov 24;12(12):3609. doi: 10.3390/nu12123609.	Weinbach N	Nutrients	2020	2020-01-12	PMC7760709		10.3390/nu12123609
33257951	Healthy Aging Interventions Reduce Repetitive Element Transcripts	Wahl D, Cavalier AN, Smith M, Seals DR, LaRocca TJ.	J Gerontol A Biol Sci Med Sci. 2021 Apr 30;76(5):805-810. doi: 10.1093/gerona/glaa302.	Wahl D	J Gerontol A Biol Sci Med Sci	2021	2020-01-12	PMC8087275		10.1093/gerona/glaa302
33230230	Peri-operative antibiotics acutely and significantly impact intestinal microbiota following bariatric surgery	Nalluri H, Kizy S, Ewing K, Luthra G, Leslie DB, Bernlohr DA, Sadowsky MJ, Ikramuddin S, Khoruts A, Staley C, Jahansouz C.	Sci Rep. 2020 Nov 23;10(1):20340. doi: 10.1038/s41598-020-77285-7.	Nalluri H	Sci Rep	2020	24/11/2020	PMC7684314		10.1038/s41598-020-77285-7
33215362	A Randomized, Controlled Trial Comparing the Impact of a Low-Calorie Ketogenic vs a Standard Low-Calorie Diet on Fat-Free Mass in Patients Receiving an Elipse™ Intragastric Balloon Treatment	Schiavo L, De Stefano G, Persico F, Gargiulo S, Di Spirito F, Griguolo G, Petrucciani N, Fontas E, Iannelli A, Pilone V.	Obes Surg. 2021 Apr;31(4):1514-1523. doi: 10.1007/s11695-020-05133-8. Epub 2020 Nov 20.	Schiavo L	Obes Surg	2021	20/11/2020	PMC8012342		10.1007/s11695-020-05133-8
33215434	Energy-restricted Central-European diet stimulates liver microsomal function in obese postmenopausal women - a randomized nutritional trial with a comparison to energy-restricted Mediterranean diet	Szczepanik M, Malesza IJ, Bajerska J, Chmurzyńska A, Muzsik A, Bermagambetova S, Mądry E, Walkowiak J, Lisowska A.	Eur Rev Med Pharmacol Sci. 2020 Nov;24(21):11165-11171. doi: 10.26355/eurrev_202011_23604.	Szczepanik M	Eur Rev Med Pharmacol Sci	2020	20/11/2020			10.26355/eurrev_202011_23604
33212907	PROFAST: A Randomized Trial Assessing the Effects of Intermittent Fasting and Lacticaseibacillus rhamnosus Probiotic among People with Prediabetes	Tay A, Pringle H, Penning E, Plank LD, Murphy R.	Nutrients. 2020 Nov 17;12(11):3530. doi: 10.3390/nu12113530.	Tay A	Nutrients	2020	20/11/2020	PMC7698325		10.3390/nu12113530
33200563	Attrition Bias in an Observational Study of Very Low-Energy Diet: A Cohort Study	Isaman DJM, Herman WH, Rothberg AE.	Obesity (Silver Spring). 2021 Jan;29(1):213-219. doi: 10.1002/oby.23031. Epub 2020 Nov 16.	Isaman DJM	Obesity (Silver Spring)	2021	17/11/2020	PMC7902335	NIHMS1630446	10.1002/oby.23031
33164516	Effect of Very-Low-Calorie Ketogenic Diet on Psoriasis Patients: A Nuclear Magnetic Resonance-Based Metabolomic Study	Castaldo G, Pagano I, Grimaldi M, Marino C, Molettieri P, Santoro A, Stillitano I, Romano R, Montoro P, D'Ursi AM, Rastrelli L.	J Proteome Res. 2021 Mar 5;20(3):1509-1521. doi: 10.1021/acs.jproteome.0c00646. Epub 2020 Nov 9.	Castaldo G	J Proteome Res	2021	2020-09-11	PMC8016365		10.1021/acs.jproteome.0c00646
33158587	The influence of fasting and energy-restricted diets on leptin and adiponectin levels in humans: A systematic review and meta-analysis	Varkaneh Kord H, M Tinsley G, O Santos H, Zand H, Nazary A, Fatahi S, Mokhtari Z, Salehi-Sahlabadi A, Tan SC, Rahmani J, Gaman MA, Sathian B, Sadeghi A, Hatami B, Soltanieh S, Aghamiri S, Bawadi H, Hekmatdoost A.	Clin Nutr. 2021 Apr;40(4):1811-1821. doi: 10.1016/j.clnu.2020.10.034. Epub 2020 Oct 24.	Varkaneh Kord H	Clin Nutr	2021	2020-07-11			10.1016/j.clnu.2020.10.034
33155479	[Assessment of nutritional-dietary status, body composition, eating behavior, and perceived image in rhythmic gymnastics athletes]	Martínez-Rodríguez A, Reche-García C, Martínez-Fernández MDC, Martínez-Sanz JM.	Nutr Hosp. 2020 Dec 16;37(6):1217-1225. doi: 10.20960/nh.03141.	Martínez-Rodríguez A	Nutr Hosp	2020	2020-06-11			10.20960/nh.03141
33151147	Very Low-Calorie Ketogenic Diets to Treat Patients With Obesity and Chronic Kidney Disease	Masi D, Risi R, Basciani S, Tuccinardi D, Mariani S, Lubrano C, Gnessi L, Watanabe M.	J Ren Nutr. 2021 Jul;31(4):340-341. doi: 10.1053/j.jrn.2020.09.001. Epub 2020 Oct 22.	Masi D	J Ren Nutr	2021	2020-05-11			10.1053/j.jrn.2020.09.001
33139960	Loss of metabolic plasticity underlies metformin toxicity in aged Caenorhabditis elegans	Espada L, Dakhovnik A, Chaudhari P, Martirosyan A, Miek L, Poliezhaieva T, Schaub Y, Nair A, Döring N, Rahnis N, Werz O, Koeberle A, Kirkpatrick J, Ori A, Ermolaeva MA.	Nat Metab. 2020 Nov;2(11):1316-1331. doi: 10.1038/s42255-020-00307-1. Epub 2020 Nov 2.	Espada L	Nat Metab	2020	2020-03-11			10.1038/s42255-020-00307-1
33119892	Effects of Protein and Calorie Restriction on the Metabolism and Toxicity Profile of Irinotecan in Cancer Patients	de Man FM, van Eerden RAG, van Doorn GM, Oomen-de Hoop E, Koolen SLW, Olieman JF, de Bruijn P, Veraart JN, van Halteren HK, Sandberg Y, Moelker A, IJzermans JNM, Lolkema MP, van Gelder T, Dollé MET, de Bruin RWF, Mathijssen RHJ.	Clin Pharmacol Ther. 2021 May;109(5):1304-1313. doi: 10.1002/cpt.2094. Epub 2020 Dec 6.	de Man FM	Clin Pharmacol Ther	2021	29/10/2020			10.1002/cpt.2094
33107071	Nutritional interventions to improve neurophysiological impairments following traumatic brain injury: A systematic review	McGeown JP, Hume PA, Theadom A, Quarrie KL, Borotkanics R.	J Neurosci Res. 2021 Feb;99(2):573-603. doi: 10.1002/jnr.24746. Epub 2020 Oct 26.	McGeown JP	J Neurosci Res	2021	27/10/2020			10.1002/jnr.24746
33096810	A High Protein Calorie Restriction Diet Alters the Gut Microbiome in Obesity	Dong TS, Luu K, Lagishetty V, Sedighian F, Woo SL, Dreskin BW, Katzka W, Chang C, Zhou Y, Arias-Jayo N, Yang J, Ahdoot A, Li Z, Pisegna JR, Jacobs JP.	Nutrients. 2020 Oct 21;12(10):3221. doi: 10.3390/nu12103221.	Dong TS	Nutrients	2020	24/10/2020	PMC7590138		10.3390/nu12103221
33096684	Does the Energy Restriction Intermittent Fasting Diet Alleviate Metabolic Syndrome Biomarkers? A Randomized Controlled Trial	Kunduraci YE, Ozbek H.	Nutrients. 2020 Oct 21;12(10):3213. doi: 10.3390/nu12103213.	Kunduraci YE	Nutrients	2020	24/10/2020	PMC7589692		10.3390/nu12103213
33094956	Feasibility of a Very Low Calorie Diet to Achieve a Sustainable 10% Weight Loss in Patients With Nonalcoholic Fatty Liver Disease	Scragg J, Avery L, Cassidy S, Taylor G, Haigh L, Boyle M, Trenell MI, Anstee QM, McPherson S, Hallsworth K.	Clin Transl Gastroenterol. 2020 Sep;11(9):e00231. doi: 10.14309/ctg.0000000000000231.	Scragg J	Clin Transl Gastroenterol	2020	23/10/2020	PMC7494144		10.14309/ctg.0000000000000231
33096550	Adults Who Are Overweight or Obese and Consuming an Energy-Restricted Healthy US-Style Eating Pattern at Either the Recommended or a Higher Protein Quantity Perceive a Shift from "Poor" to "Good" Sleep: A Randomized Controlled Trial	Hudson JL, Zhou J, Campbell WW.	J Nutr. 2020 Dec 10;150(12):3216-3223. doi: 10.1093/jn/nxaa302.	Hudson JL	J Nutr	2020	23/10/2020	PMC7726118		10.1093/jn/nxaa302
33089625	Short-term protein restriction at advanced age stimulates FGF21 signalling, energy expenditure and browning of white adipose tissue	Dommerholt MB, Blankestijn M, Vieira-Lara MA, van Dijk TH, Wolters H, Koster MH, Gerding A, van Os RP, Bloks VW, Bakker BM, Kruit JK, Jonker JW.	FEBS J. 2021 Apr;288(7):2257-2277. doi: 10.1111/febs.15604. Epub 2020 Nov 9.	Dommerholt MB	FEBS J	2021	22/10/2020	PMC8048886		10.1111/febs.15604
33077809	Determinants favoring weight regain after weight-loss therapy among postmenopausal women	Bajerska J, Chmurzynska A, Muzsik-Kazimierska A, Mądry E, Pięta B, Sobkowski M, Walkowiak J.	Sci Rep. 2020 Oct 19;10(1):17713. doi: 10.1038/s41598-020-74302-7.	Bajerska J	Sci Rep	2020	20/10/2020	PMC7572409		10.1038/s41598-020-74302-7
33065163	Metabolic impact of weight loss induced reduction of adipose ACE-2 - Potential implication in COVID-19 infections?	Li L, Spranger L, Soll D, Beer F, Brachs M, Spranger J, Mai K.	Metabolism. 2020 Dec;113:154401. doi: 10.1016/j.metabol.2020.154401. Epub 2020 Oct 13.	Li L	Metabolism	2020	16/10/2020	PMC7552972		10.1016/j.metabol.2020.154401
33044768	Grape seed extract supplementation along with a restricted-calorie diet improves cardiovascular risk factors in obese or overweight adult individuals: A randomized, placebo-controlled trial	Yousefi R, Parandoosh M, Khorsandi H, Hosseinzadeh N, Madani Tonekaboni M, Saidpour A, Babaei H, Ghorbani A.	Phytother Res. 2021 Feb;35(2):987-995. doi: 10.1002/ptr.6859. Epub 2020 Oct 12.	Yousefi R	Phytother Res	2021	2020-12-10			10.1002/ptr.6859
33042004	Efficacy of a 2-Month Very Low-Calorie Ketogenic Diet (VLCKD) Compared to a Standard Low-Calorie Diet in Reducing Visceral and Liver Fat Accumulation in Patients With Obesity	Cunha GM, Guzman G, Correa De Mello LL, Trein B, Spina L, Bussade I, Marques Prata J, Sajoux I, Countinho W.	Front Endocrinol (Lausanne). 2020 Sep 14;11:607. doi: 10.3389/fendo.2020.00607. eCollection 2020.	Cunha GM	Front Endocrinol (Lausanne)	2020	2020-12-10	PMC7521128		10.3389/fendo.2020.00607
33030983	Efficacy of L-Leucine Supplementation Coupled with a Calorie-Restricted Diet to Promote Weight Loss in Mid-Life Women	Funderburk L, Heileson J, Peterson M, Willoughby DS.	J Am Coll Nutr. 2021 Nov-Dec;40(8):699-707. doi: 10.1080/07315724.2020.1815607. Epub 2020 Oct 8.	Funderburk L	J Am Coll Nutr	2021	2020-08-10			10.1080/07315724.2020.1815607
33031557	Effects of Intermittent Fasting or Calorie Restriction on Markers of Lipid Metabolism in Human Skeletal Muscle	Liu B, Hutchison AT, Thompson CH, Lange K, Wittert GA, Heilbronn LK.	J Clin Endocrinol Metab. 2021 Mar 8;106(3):e1389-e1399. doi: 10.1210/clinem/dgaa707.	Liu B	J Clin Endocrinol Metab	2021	2020-08-10			10.1210/clinem/dgaa707
33028352	Effect of intermittent versus continuous calorie restriction on body weight and cardiometabolic risk markers in subjects with overweight or obesity and mild-to-moderate hypertriglyceridemia: a randomized trial	Maroofi M, Nasrollahzadeh J.	Lipids Health Dis. 2020 Oct 7;19(1):216. doi: 10.1186/s12944-020-01399-0.	Maroofi M	Lipids Health Dis	2020	2020-08-10	PMC7542333		10.1186/s12944-020-01399-0
33016501	Efficacy of a dietitian-led very low calorie diet (VLCD) based model of care to facilitate weight loss for obese patients prior to elective, non-bariatric surgery	Griffin SB, Ross LJ, Burstow MJ, Desbrow B, Palmer MA.	J Hum Nutr Diet. 2021 Feb;34(1):188-198. doi: 10.1111/jhn.12819. Epub 2020 Oct 5.	Griffin SB	J Hum Nutr Diet	2021	2020-05-10			10.1111/jhn.12819
33017844	Intermittent Fasting Improves Cardiometabolic Risk Factors and Alters Gut Microbiota in Metabolic Syndrome Patients	Guo Y, Luo S, Ye Y, Yin S, Fan J, Xia M.	J Clin Endocrinol Metab. 2021 Jan 1;106(1):64-79. doi: 10.1210/clinem/dgaa644.	Guo Y	J Clin Endocrinol Metab	2021	2020-05-10			10.1210/clinem/dgaa644
33006707	Diabetes medications as potential calorie restriction mimetics-a focus on the alpha-glucosidase inhibitor acarbose	Smith DL Jr, Orlandella RM, Allison DB, Norian LA.	Geroscience. 2021 Jun;43(3):1123-1133. doi: 10.1007/s11357-020-00278-x. Epub 2020 Oct 2.	Smith DL Jr	Geroscience	2021	2020-02-10	PMC8190416		10.1007/s11357-020-00278-x
32998364	Effectiveness of a Very Low Calorie Ketogenic Diet on Testicular Function in Overweight/Obese Men	Mongioì LM, Cimino L, Condorelli RA, Magagnini MC, Barbagallo F, Cannarella R, La Vignera S, Calogero AE.	Nutrients. 2020 Sep 28;12(10):2967. doi: 10.3390/nu12102967.	Mongioì LM	Nutrients	2020	2020-01-10	PMC7600614		10.3390/nu12102967
32992924	Impacts of Calorie Restriction and Intermittent Fasting on Health and Diseases: Current Trends	Chung HY, Kim DH, Bang E, Yu BP.	Nutrients. 2020 Sep 25;12(10):2948. doi: 10.3390/nu12102948.	Chung HY	Nutrients	2020	30/09/2020	PMC7599444		10.3390/nu12102948
32986097	Effects of Time-Restricted Eating on Weight Loss and Other Metabolic Parameters in Women and Men With Overweight and Obesity: The TREAT Randomized Clinical Trial	Lowe DA, Wu N, Rohdin-Bibby L, Moore AH, Kelly N, Liu YE, Philip E, Vittinghoff E, Heymsfield SB, Olgin JE, Shepherd JA, Weiss EJ.	JAMA Intern Med. 2020 Nov 1;180(11):1491-1499. doi: 10.1001/jamainternmed.2020.4153.	Lowe DA	JAMA Intern Med	2020	28/09/2020	PMC7522780		10.1001/jamainternmed.2020.4153
32976238	What is causing this postpartum patient's ketoacidosis?	Ostrom SJ, Camacho L, Carius B.	JAAPA. 2020 Oct;33(10):53-55. doi: 10.1097/01.JAA.0000697272.75661.89.	Ostrom SJ	JAAPA	2020	25/09/2020			10.1097/01.JAA.0000697272.75661.89
32966295	Lack of head sparing following third-trimester caloric restriction among Tanzanian Maasai	Powell CD, Wilson WM, Olesaningo G, Manyama M, Jamniczky H, Spritz R, Cross JC, Lukowiak K, Hallgrimsson B, Gonzalez PN.	PLoS One. 2020 Sep 23;15(9):e0237700. doi: 10.1371/journal.pone.0237700. eCollection 2020.	Powell CD	PLoS One	2020	23/09/2020	PMC7510984		10.1371/journal.pone.0237700
32940695	Effects of caloric restriction on human physiological, psychological, and behavioral outcomes: highlights from CALERIE phase 2	Dorling JL, van Vliet S, Huffman KM, Kraus WE, Bhapkar M, Pieper CF, Stewart T, Das SK, Racette SB, Roberts SB, Ravussin E, Redman LM, Martin CK; CALERIE Study Group.	Nutr Rev. 2021 Jan 1;79(1):98-113. doi: 10.1093/nutrit/nuaa085.	Dorling JL	Nutr Rev	2021	17/09/2020	PMC7727025		10.1093/nutrit/nuaa085
32940404	The beneficial effects of sumac (Rhus coriaria L.) supplementation along with restricted calorie diet on anthropometric indices, oxidative stress, and inflammation in overweight or obese women with depression: A randomized clinical trial	Hariri N, Darafshi Ghahroudi S, Jahangiri S, Borumandnia N, Narmaki E, Saidpour A.	Phytother Res. 2020 Nov;34(11):3041-3051. doi: 10.1002/ptr.6737. Epub 2020 Jul 1.	Hariri N	Phytother Res	2020	17/09/2020			10.1002/ptr.6737
32936248	Vitamin D deficiency promotes large rupture-prone abdominal aortic aneurysms and cholecalciferol supplementation limits progression of aneurysms in a mouse model	Nsengiyumva V, Krishna SM, Moran CS, Moxon JV, Morton SK, Clarke MW, Seto SW, Golledge J.	Clin Sci (Lond). 2020 Sep 30;134(18):2521-2534. doi: 10.1042/CS20200980.	Nsengiyumva V	Clin Sci (Lond)	2020	16/09/2020	PMC7536319		10.1042/CS20200980
32925495	A Low-Calorie Diet with or without Exercise Reduces Postprandial Aortic Waveform in Females with Obesity	Heiston EM, Gilbertson NM, Eichner NZM, Malin SK.	Med Sci Sports Exerc. 2021 Apr 1;53(4):796-803. doi: 10.1249/MSS.0000000000002515.	Heiston EM	Med Sci Sports Exerc	2021	14/09/2020			10.1249/MSS.0000000000002515
32907522	A Community-Based Feasibility Study of Weight-Loss in Rural, Older Adults with Obesity	Batsis JA, Petersen CL, Cook SB, Al-Nimr RI, Pidgeon D, Mackenzie TA, Bartels SJ.	J Nutr Gerontol Geriatr. 2020 Jul-Dec;39(3-4):192-204. doi: 10.1080/21551197.2020.1817226. Epub 2020 Sep 9.	Batsis JA	J Nutr Gerontol Geriatr	2020	2020-10-09	PMC7787696	NIHMS1656763	10.1080/21551197.2020.1817226
32899756	Impact of a Moderately Hypocaloric Mediterranean Diet on the Gut Microbiota Composition of Italian Obese Patients	Pisanu S, Palmas V, Madau V, Casula E, Deledda A, Cusano R, Uva P, Vascellari S, Boi F, Loviselli A, Manzin A, Velluzzi F.	Nutrients. 2020 Sep 4;12(9):2707. doi: 10.3390/nu12092707.	Pisanu S	Nutrients	2020	2020-09-09	PMC7551852		10.3390/nu12092707
32898176	Participant experiences of a low-energy total diet replacement programme: A descriptive qualitative study	Astbury NM, Albury C, Nourse R, Jebb SA.	PLoS One. 2020 Sep 8;15(9):e0238645. doi: 10.1371/journal.pone.0238645. eCollection 2020.	Astbury NM	PLoS One	2020	2020-08-09	PMC7478843		10.1371/journal.pone.0238645
32898787	Calorie restriction and synbiotics effect on quality of life and edema reduction in breast cancer-related lymphedema, a clinical trial	Vafa S, Zarrati M, Malakootinejad M, Totmaj AS, Zayeri F, Salehi M, Sanati V, Haghighat S.	Breast. 2020 Dec;54:37-45. doi: 10.1016/j.breast.2020.08.008. Epub 2020 Aug 27.	Vafa S	Breast	2020	2020-08-09	PMC7486474		10.1016/j.breast.2020.08.008
32876182	Intermittent Fasting Attenuates Exercise Training-Induced Cardiac Remodeling	Basilio PG, Oliveira APC, Castro ACF, Carvalho MR, Zagatto AM, Martinez PF, Okoshi MP, Okoshi K, Ota GE, Reis FAD, Oliveira-Junior SA.	Arq Bras Cardiol. 2020 Aug 28;115(2):184-193. doi: 10.36660/abc.20190349.	Basilio PG	Arq Bras Cardiol	2020	2020-03-09	PMC8384291		10.36660/abc.20190349
32873926	An exploratory investigation of the impact of 'fast' and 'feed' days during intermittent energy restriction on free-living energy balance behaviours and subjective states in women with overweight/obesity	Beaulieu K, Casanova N, Oustric P, Hopkins M, Varady K, Finlayson G, Gibbons C.	Eur J Clin Nutr. 2021 Mar;75(3):430-437. doi: 10.1038/s41430-020-00740-1. Epub 2020 Sep 1.	Beaulieu K	Eur J Clin Nutr	2021	2020-03-09			10.1038/s41430-020-00740-1
32843424	Moderate calorie restriction improves cardiometabolic risk factors in healthy individuals	Khong TK, Kimpton J.	Drug Ther Bull. 2020 Sep;58(9):135-136. doi: 10.1136/dtb.2020.000042.	Khong TK	Drug Ther Bull	2020	27/08/2020			10.1136/dtb.2020.000042
32840294	You Have Come A Long Way Baby: Five Decades of Research on the Biology of Aging From the Perspective of a Researcher Studying Aging	Richardson A.	J Gerontol A Biol Sci Med Sci. 2021 Jan 1;76(1):57-63. doi: 10.1093/gerona/glaa208.	Richardson A	J Gerontol A Biol Sci Med Sci	2021	26/08/2020			10.1093/gerona/glaa208
32841116	Managing Weight With Technology	Mertz L.	IEEE Pulse. 2020 Jul-Aug;11(4):26-31. doi: 10.1109/MPULS.2020.3008449.	Mertz L	IEEE Pulse	2020	26/08/2020			10.1109/MPULS.2020.3008449
32841230	Gluconeogenesis and PEPCK are critical components of healthy aging and dietary restriction life extension	Onken B, Kalinava N, Driscoll M.	PLoS Genet. 2020 Aug 25;16(8):e1008982. doi: 10.1371/journal.pgen.1008982. eCollection 2020 Aug.	Onken B	PLoS Genet	2020	26/08/2020	PMC7473531		10.1371/journal.pgen.1008982
32825404	The Effect of Acute Hypohydration on Indicators of Glycemic Regulation, Appetite, Metabolism and Stress: A Systematic Review and Meta-Analysis	Zaplatosch ME, Adams WM.	Nutrients. 2020 Aug 20;12(9):2526. doi: 10.3390/nu12092526.	Zaplatosch ME	Nutrients	2020	23/08/2020	PMC7551868		10.3390/nu12092526
32821924	Association of Sex or Race With the Effect of Weight Loss on Physical Function: A Secondary Analysis of 8 Randomized Clinical Trials	Beavers KM, Neiberg RH, Kritchevsky SB, Nicklas BJ, Kitzman DW, Messier SP, Rejeski WJ, Ard JD, Beavers DP.	JAMA Netw Open. 2020 Aug 3;3(8):e2014631. doi: 10.1001/jamanetworkopen.2020.14631.	Beavers KM	JAMA Netw Open	2020	22/08/2020	PMC7442923		10.1001/jamanetworkopen.2020.14631
32803412	Effect of 2 years of calorie restriction on liver biomarkers: results from the CALERIE phase 2 randomized controlled trial	Dorling JL, Ravussin E, Redman LM, Bhapkar M, Huffman KM, Racette SB, Das SK, Apolzan JW, Kraus WE, Höchsmann C, Martin CK; CALERIE Phase 2 Study Group.	Eur J Nutr. 2021 Apr;60(3):1633-1643. doi: 10.1007/s00394-020-02361-7. Epub 2020 Aug 14.	Dorling JL	Eur J Nutr	2021	18/08/2020	PMC7882001	NIHMS1620878	10.1007/s00394-020-02361-7
32784736	Effect of Polyglucosamine on Weight Loss and Metabolic Parameters in Overweight and Obesity: A Systemic Review and Meta-Analysis	Perna S, Basharat SNM, Ali KF, Eid A, Gasparri C, Infantino V, Faliva MA, Naso M, Cazzola R, Cestaro B, Rondanelli M.	Nutrients. 2020 Aug 7;12(8):2365. doi: 10.3390/nu12082365.	Perna S	Nutrients	2020	14/08/2020	PMC7468765		10.3390/nu12082365
32782010	The effects of spinach-derived thylakoid supplementation in combination with calorie restriction on anthropometric parameters and metabolic profiles in obese women with polycystic ovary syndrome: a randomized, double-blind, placebo-controlled clinical trial	Tabrizi FPF, Farhangi MA, Vaezi M, Hemmati S.	Nutr J. 2020 Aug 11;19(1):82. doi: 10.1186/s12937-020-00601-4.	Tabrizi FPF	Nutr J	2020	13/08/2020	PMC7422584		10.1186/s12937-020-00601-4
32780629	The Effects of Intermittent Fasting on Glycemic Control and Body Composition in Adults with Obesity and Type 2 Diabetes: A Systematic Review	Vitale R, Kim Y.	Metab Syndr Relat Disord. 2020 Dec;18(10):450-461. doi: 10.1089/met.2020.0048. Epub 2020 Aug 11.	Vitale R	Metab Syndr Relat Disord	2020	2020-12-08			10.1089/met.2020.0048
32776118	A New Concept in Diet Restriction Is Cleaning Up!	Promislow DEL.	J Gerontol A Biol Sci Med Sci. 2021 Mar 31;76(4):599-600. doi: 10.1093/gerona/glaa195.	Promislow DEL	J Gerontol A Biol Sci Med Sci	2021	2020-11-08	PMC8011697		10.1093/gerona/glaa195
32776237	Type 2 diabetes remission: 2 year within-trial and lifetime-horizon cost-effectiveness of the Diabetes Remission Clinical Trial (DiRECT)/Counterweight-Plus weight management programme	Xin Y, Davies A, Briggs A, McCombie L, Messow CM, Grieve E, Leslie WS, Taylor R, Lean MEJ.	Diabetologia. 2020 Oct;63(10):2112-2122. doi: 10.1007/s00125-020-05224-2. Epub 2020 Aug 10.	Xin Y	Diabetologia	2020	2020-11-08	PMC7476973		10.1007/s00125-020-05224-2
32768315	Effects of high versus standard essential amino acid intakes on whole-body protein turnover and mixed muscle protein synthesis during energy deficit: A randomized, crossover study	Gwin JA, Church DD, Hatch-McChesney A, Howard EE, Carrigan CT, Murphy NE, Wilson MA, Margolis LM, Carbone JW, Wolfe RR, Ferrando AA, Pasiakos SM.	Clin Nutr. 2021 Mar;40(3):767-777. doi: 10.1016/j.clnu.2020.07.019. Epub 2020 Jul 22.	Gwin JA	Clin Nutr	2021	2020-10-08			10.1016/j.clnu.2020.07.019
32751664	Is Caloric Restriction Associated with Better Healthy Aging Outcomes? A Systematic Review and Meta-Analysis of Randomized Controlled Trials	Caristia S, Vito M, Sarro A, Leone A, Pecere A, Zibetti A, Filigheddu N, Zeppegno P, Prodam F, Faggiano F, Marzullo P.	Nutrients. 2020 Jul 30;12(8):2290. doi: 10.3390/nu12082290.	Caristia S	Nutrients	2020	2020-06-08	PMC7468870		10.3390/nu12082290
32713721	Effects of time-restricted feeding on body weight, body composition and vital signs in low-income women with obesity: A 12-month randomized clinical trial	de Oliveira Maranhão Pureza IR, da Silva Junior AE, Silva Praxedes DR, Lessa Vasconcelos LG, de Lima Macena M, Vieira de Melo IS, de Menezes Toledo Florêncio TM, Bueno NB.	Clin Nutr. 2021 Mar;40(3):759-766. doi: 10.1016/j.clnu.2020.06.036. Epub 2020 Jul 14.	de Oliveira Maranhão Pureza IR	Clin Nutr	2021	28/07/2020			10.1016/j.clnu.2020.06.036
32708435	Baseline HOMA IR and Circulating FGF21 Levels Predict NAFLD Improvement in Patients Undergoing a Low Carbohydrate Dietary Intervention for Weight Loss: A Prospective Observational Pilot Study	Watanabe M, Risi R, Camajani E, Contini S, Persichetti A, Tuccinardi D, Ernesti I, Mariani S, Lubrano C, Genco A, Spera G, Gnessi L, Basciani S.	Nutrients. 2020 Jul 18;12(7):2141. doi: 10.3390/nu12072141.	Watanabe M	Nutrients	2020	26/07/2020	PMC7400878		10.3390/nu12072141
32698325	Low-Glycemic-Index/Load Desserts Decrease Glycemic and Insulinemic Response in Patients with Type 2 Diabetes Mellitus	Argiana V, Kanellos PΤ, Eleftheriadou I, Tsitsinakis G, Perrea D, Tentolouris NK.	Nutrients. 2020 Jul 20;12(7):2153. doi: 10.3390/nu12072153.	Argiana V	Nutrients	2020	24/07/2020	PMC7400801		10.3390/nu12072153
32690177	Caloric restriction in heart failure: A systematic review	Bianchi VE.	Clin Nutr ESPEN. 2020 Aug;38:50-60. doi: 10.1016/j.clnesp.2020.04.009. Epub 2020 May 13.	Bianchi VE	Clin Nutr ESPEN	2020	22/07/2020			10.1016/j.clnesp.2020.04.009
32686444	ACYL-CoA synthetase long-chain 5 polymorphism is associated with weight loss and metabolic changes in response to a partial meal-replacement hypocaloric diet	Izaola Jáuregui O, López Gómez JJ, Primo Martín D, Torres Torres B, Gómez Hoyos E, Ortolá Buigues A, Delgado E, de Luis Román DA.	Nutr Hosp. 2020 Aug 27;37(4):757-762. doi: 10.20960/nh.03019.	Izaola Jáuregui O	Nutr Hosp	2020	21/07/2020			10.20960/nh.03019
32679761	Untargeted Profiling of Bile Acids and Lysophospholipids Identifies the Lipid Signature Associated with Glycemic Outcome in an Obese Non-Diabetic Clinical Cohort	Christinat N, Valsesia A, Masoodi M.	Biomolecules. 2020 Jul 15;10(7):1049. doi: 10.3390/biom10071049.	Christinat N	Biomolecules	2020	19/07/2020	PMC7407211		10.3390/biom10071049
32675017	The effect of caloric restriction on blood pressure and cardiovascular function: A systematic review and meta-analysis of randomized controlled trials	Kirkham AA, Beka V, Prado CM.	Clin Nutr. 2021 Mar;40(3):728-739. doi: 10.1016/j.clnu.2020.06.029. Epub 2020 Jul 1.	Kirkham AA	Clin Nutr	2021	18/07/2020			10.1016/j.clnu.2020.06.029
32652516	Protein and calorie restriction may improve outcomes in living kidney donors and kidney transplant recipients	Jongbloed F, de Bruin RWF, Steeg HV, Beekhof P, Wackers P, Hesselink DA, Hoeijmakers JHJ, Dollé MET, IJzermans JNM.	Aging (Albany NY). 2020 Jul 11;12(13):12441-12467. doi: 10.18632/aging.103619. Epub 2020 Jul 11.	Jongbloed F	Aging (Albany NY)	2020	2020-12-07	PMC7377854		10.18632/aging.103619
32641437	Therapeutic use of intermittent fasting and ketogenic diet as an alternative treatment for type 2 diabetes in a normal weight woman: a 14-month case study	Lichtash C, Fung J, Ostoich KC, Ramos M.	BMJ Case Rep. 2020 Jul 7;13(7):e234223. doi: 10.1136/bcr-2019-234223.	Lichtash C	BMJ Case Rep	2020	2020-10-07	PMC7342268		10.1136/bcr-2019-234223
32641220	Higher unacylated ghrelin and insulin sensitivity following dietary restriction and weight loss in obese humans	Barazzoni R, Gortan Cappellari G, Zanetti M, Klaus KA, Semolic A, Johnson ML, Nair KS.	Clin Nutr. 2021 Feb;40(2):638-644. doi: 10.1016/j.clnu.2020.06.014. Epub 2020 Jun 25.	Barazzoni R	Clin Nutr	2021	2020-10-07	PMC7759591	NIHMS1607344	10.1016/j.clnu.2020.06.014
32639096	Hypocaloric Low-Carbohydrate and Low-Fat Diets with Fixed Protein Lead to Similar Health Outcomes in Obese Mice	Minderis P, Fokin A, Dirmontas M, Ratkevicius A.	Obesity (Silver Spring). 2020 Aug;28(8):1494-1502. doi: 10.1002/oby.22872. Epub 2020 Jul 8.	Minderis P	Obesity (Silver Spring)	2020	2020-09-07			10.1002/oby.22872
32635152	Association between the Potential Influence of a Lifestyle Intervention in Older Individuals with Excess Weight and Metabolic Syndrome on Untreated Household Cohabitants and Their Family Support: The PREDIMED-Plus Study	Basora J, Villalobos F, Pallejà-Millán M, Babio N, Goday A, Castañer O, Fitó M, Zomeño MD, Pintó X, Sacanella E, Paz-Graniel I, Salas-Salvadó J.	Nutrients. 2020 Jul 3;12(7):1975. doi: 10.3390/nu12071975.	Basora J	Nutrients	2020	2020-09-07	PMC7400558		10.3390/nu12071975
32621748	Effect of Diet on Insulin Resistance in Polycystic Ovary Syndrome	Shang Y, Zhou H, Hu M, Feng H.	J Clin Endocrinol Metab. 2020 Oct 1;105(10):dgaa425. doi: 10.1210/clinem/dgaa425.	Shang Y	J Clin Endocrinol Metab	2020	2020-05-07			10.1210/clinem/dgaa425
32619561	ERGO2: A Prospective, Randomized Trial of Calorie-Restricted Ketogenic Diet and Fasting in Addition to Reirradiation for Malignant Glioma	Voss M, Wagner M, von Mettenheim N, Harter PN, Wenger KJ, Franz K, Bojunga J, Vetter M, Gerlach R, Glatzel M, Paulsen F, Hattingen E, Baehr O, Ronellenfitsch MW, Fokas E, Imhoff D, Steinbach JP, Rödel C, Rieger J.	Int J Radiat Oncol Biol Phys. 2020 Nov 15;108(4):987-995. doi: 10.1016/j.ijrobp.2020.06.021. Epub 2020 Jun 30.	Voss M	Int J Radiat Oncol Biol Phys	2020	2020-04-07			10.1016/j.ijrobp.2020.06.021
32614382	Limited Evidence for the Health Effects and Safety of Intermittent Fasting Among Patients With Type 2 Diabetes	Horne BD, Grajower MM, Anderson JL.	JAMA. 2020 Jul 28;324(4):341-342. doi: 10.1001/jama.2020.3908.	Horne BD	JAMA	2020	2020-03-07			10.1001/jama.2020.3908
32599082	Early adaptive thermogenesis is a determinant of weight loss after six weeks of caloric restriction in overweight subjects	Heinitz S, Hollstein T, Ando T, Walter M, Basolo A, Krakoff J, Votruba SB, Piaggi P.	Metabolism. 2020 Sep;110:154303. doi: 10.1016/j.metabol.2020.154303. Epub 2020 Jun 27.	Heinitz S	Metabolism	2020	30/06/2020	PMC7484122	NIHMS1607484	10.1016/j.metabol.2020.154303
32597030	Effect of low energy availability during three consecutive days of endurance training on iron metabolism in male long distance runners	Ishibashi A, Kojima C, Tanabe Y, Iwayama K, Hiroyama T, Tsuji T, Kamei A, Goto K, Takahashi H.	Physiol Rep. 2020 Jun;8(12):e14494. doi: 10.14814/phy2.14494.	Ishibashi A	Physiol Rep	2020	30/06/2020	PMC7322269		10.14814/phy2.14494
32580282	The Effects of a Low Calorie Ketogenic Diet on Glycaemic Control Variables in Hyperinsulinemic Overweight/Obese Females	Michalczyk MM, Klonek G, Maszczyk A, Zajac A.	Nutrients. 2020 Jun 22;12(6):1854. doi: 10.3390/nu12061854.	Michalczyk MM	Nutrients	2020	26/06/2020	PMC7353458		10.3390/nu12061854
32572434	[The effects and mechanism of caloric restriction on energy metabolism]	Fan XN, Chen LX, Xu GY.	Sheng Li Xue Bao. 2020 Jun 25;72(3):371-381.	Fan XN	Sheng Li Xue Bao	2020	24/06/2020
32572955	Expression of NF-κB, IL-6, and IL-10 genes, body composition, and hepatic fibrosis in obese patients with NAFLD-Combined effects of oleoylethanolamide supplementation and calorie restriction: A triple-blind randomized controlled clinical trial	Tutunchi H, Ostadrahimi A, Saghafi-Asl M, Roshanravan N, Shakeri-Bavil A, Asghari-Jafarabadi M, Farrin N, Mobasseri M.	J Cell Physiol. 2021 Jan;236(1):417-426. doi: 10.1002/jcp.29870. Epub 2020 Jun 22.	Tutunchi H	J Cell Physiol	2021	24/06/2020			10.1002/jcp.29870
32571614	Effects of diet and exercise on adipocytokine levels in patients with moderate to severe chronic kidney disease	Aydemir N, Pike MM, Alsouqi A, Headley SAE, Tuttle K, Evans EE, Milch CM, Moody KA, Germain M, Lipworth L, Himmelfarb J, Ikizler TA, Robinson-Cohen C.	Nutr Metab Cardiovasc Dis. 2020 Jul 24;30(8):1375-1381. doi: 10.1016/j.numecd.2020.04.012. Epub 2020 Apr 21.	Aydemir N	Nutr Metab Cardiovasc Dis	2020	24/06/2020	PMC7659879	NIHMS1586285	10.1016/j.numecd.2020.04.012
32565499	Visceral adipose tissue resides within the reference range in children with Prader-Willi syndrome receiving nutritional intervention on a regular basis	Koizumi M, Ida S, Shoji Y, Nishimoto Y, Etani Y, Kawai M.	Endocr J. 2020 Oct 28;67(10):1029-1037. doi: 10.1507/endocrj.EJ19-0489. Epub 2020 Jun 19.	Koizumi M	Endocr J	2020	23/06/2020			10.1507/endocrj.EJ19-0489
32564204	The Influence of Fasting and Energy Restricting Diets on Blood Pressure in Humans: A Systematic Review and Meta-Analysis	Kord-Varkaneh H, Nazary-Vannani A, Mokhtari Z, Salehi-Sahlabadi A, Rahmani J, Clark CCT, Fatahi S, Zanghelini F, Hekmatdoost A, Okunade K, Mirmiran P.	High Blood Press Cardiovasc Prev. 2020 Aug;27(4):271-280. doi: 10.1007/s40292-020-00391-0. Epub 2020 Jun 20.	Kord-Varkaneh H	High Blood Press Cardiovasc Prev	2020	22/06/2020			10.1007/s40292-020-00391-0
32563253	Comparison of the effect of rapeseed oil or amaranth seed oil supplementation on weight loss, body composition, and changes in the metabolic profile of obese patients following 3-week body mass reduction program: a randomized clinical trial	Moszak M, Zawada A, Juchacz A, Grzymisławski M, Bogdański P.	Lipids Health Dis. 2020 Jun 20;19(1):143. doi: 10.1186/s12944-020-01330-7.	Moszak M	Lipids Health Dis	2020	22/06/2020	PMC7305596		10.1186/s12944-020-01330-7
32554843	Effects of whole-body electromyostimulation exercise and caloric restriction on cardiometabolic risk profile and muscle strength in obese women with the metabolic syndrome: a pilot study	Reljic D, Konturek PC, Herrmann HJ, Neurath MF, Zopf Y.	J Physiol Pharmacol. 2020 Feb;71(1). doi: 10.26402/jpp.2020.1.08. Epub 2020 Jun 13.	Reljic D	J Physiol Pharmacol	2020	20/06/2020			10.26402/jpp.2020.1.08
32559563	2 -Deoxy - d-glucose at chronic low dose acts as a caloric restriction mimetic through a mitohormetic induction of ROS in the brain of accelerated senescence model of rat	Kumar R, Saraswat K, Rizvi SI.	Arch Gerontol Geriatr. 2020 Sep-Oct;90:104133. doi: 10.1016/j.archger.2020.104133. Epub 2020 Jun 1.	Kumar R	Arch Gerontol Geriatr	2020	20/06/2020			10.1016/j.archger.2020.104133
32552390	mRNA expression of ageing-associated genes in calorie reduction is subject to donor variability and can be induced by calorie restriction mimetics	Matt K, Hochecker B, Schöller-Mann A, Bergemann J.	Nutr Health. 2020 Sep;26(3):253-262. doi: 10.1177/0260106020932732. Epub 2020 Jun 18.	Matt K	Nutr Health	2020	20/06/2020			10.1177/0260106020932732
32546361	The effect of ultra-processed very low-energy diets on gut microbiota and metabolic outcomes in individuals with obesity: A systematic literature review	Lane M, Howland G, West M, Hockey M, Marx W, Loughman A, O'Hely M, Jacka F, Rocks T.	Obes Res Clin Pract. 2020 May-Jun;14(3):197-204. doi: 10.1016/j.orcp.2020.04.006. Epub 2020 Jun 13.	Lane M	Obes Res Clin Pract	2020	18/06/2020			10.1016/j.orcp.2020.04.006
32544364	Triethylenetetramine (trientine): a caloric restriction mimetic with a new mode of action	Pietrocola F, Castoldi F, Madeo F, Kroemer G.	Autophagy. 2020 Aug;16(8):1534-1536. doi: 10.1080/15548627.2020.1778293. Epub 2020 Jun 16.	Pietrocola F	Autophagy	2020	17/06/2020	PMC7469548		10.1080/15548627.2020.1778293
32540806	Comparing effects of low glycemic index/high-fat, high-calorie diet and high-fat, high-calorie diet on cytokine levels of patients with cystic fibrosis: A randomized controlled clinical trial	Gorji Z, Modaresi M, Yekanni-Nejad S, Rezaei N, Mahmoudi M.	Eur Cytokine Netw. 2020 Mar 1;31(1):32-38. doi: 10.1684/ecn.2020.0442.	Gorji Z	Eur Cytokine Netw	2020	17/06/2020			10.1684/ecn.2020.0442
32544401	Does physical activity associated with chronic food restriction alleviate anxiety like behaviour, in female mice?	Duriez P, Eddarkaoui S, Blum D, Dickson SL, Gorwood P, Tolle V, Viltart O.	Horm Behav. 2020 Aug;124:104807. doi: 10.1016/j.yhbeh.2020.104807. Epub 2020 Jul 10.	Duriez P	Horm Behav	2020	17/06/2020			10.1016/j.yhbeh.2020.104807
32534949	TICACOS international: A multi-center, randomized, prospective controlled study comparing tight calorie control versus Liberal calorie administration study	Singer P, De Waele E, Sanchez C, Ruiz Santana S, Montejo JC, Laterre PF, Soroksky A, Moscovici E, Kagan I.	Clin Nutr. 2021 Feb;40(2):380-387. doi: 10.1016/j.clnu.2020.05.024. Epub 2020 May 30.	Singer P	Clin Nutr	2021	15/06/2020			10.1016/j.clnu.2020.05.024
32527768	Metabolic Effects of Gastric Bypass Surgery: Is It All About Calories?	Herzog K, Berggren J, Al Majdoub M, Balderas Arroyo C, Lindqvist A, Hedenbro J, Groop L, Wierup N, Spégel P.	Diabetes. 2020 Sep;69(9):2027-2035. doi: 10.2337/db20-0131. Epub 2020 Jun 11.	Herzog K	Diabetes	2020	13/06/2020			10.2337/db20-0131
32524941	Long-term effects of early overfeeding and food restriction during puberty on cardiac remodeling in adult rats	Chavaglia Cavalet L, Dos Santos Ribeiro LC, Rosa GB, Sousa KK, de Melo ABS, Campos DBT, Ferreira LA, Amaral NO, Calisto YTV, de Castro AG, de Castro CH, Pedrino GR, Gomes RM.	J Dev Orig Health Dis. 2020 Oct;11(5):492-498. doi: 10.1017/S2040174420000513. Epub 2020 Jun 11.	Chavaglia Cavalet L	J Dev Orig Health Dis	2020	2020-12-06			10.1017/S2040174420000513
32523094	Autologous fecal transplantation from a lean state potentiates caloric restriction effects on body weight and adiposity in obese mice	Pérez-Matute P, Íñiguez M, de Toro M, Recio-Fernández E, Oteo JA.	Sci Rep. 2020 Jun 10;10(1):9388. doi: 10.1038/s41598-020-64961-x.	Pérez-Matute P	Sci Rep	2020	2020-12-06	PMC7287061		10.1038/s41598-020-64961-x
32516639	Early-adulthood caloric restriction is beneficial to improve renal redox status as future anti-aging strategy in rats	Dağ AD, Yanar K, Atayik MC, Simsek B, Belce A, Çakatay U.	Arch Gerontol Geriatr. 2020 Sep-Oct;90:104116. doi: 10.1016/j.archger.2020.104116. Epub 2020 May 23.	Dağ AD	Arch Gerontol Geriatr	2020	2020-10-06			10.1016/j.archger.2020.104116
32498328	The Effect of Low-Carbohydrate Diet on Macrovascular and Microvascular Endothelial Function is Not Affected by the Provision of Caloric Restriction in Women with Obesity: A Randomized Study	Hwang CL, Ranieri C, Szczurek MR, Ellythy AM, Elokda A, Mahmoud AM, Phillips SA.	Nutrients. 2020 Jun 2;12(6):1649. doi: 10.3390/nu12061649.	Hwang CL	Nutrients	2020	2020-06-06	PMC7352173		10.3390/nu12061649
32493057	Health and Economic Impacts of the National Menu Calorie Labeling Law in the United States: A Microsimulation Study	Liu J, Mozaffarian D, Sy S, Lee Y, Wilde PE, Abrahams-Gessel S, Gaziano T, Micha R; FOOD-PRICE (Policy Review and Intervention Cost-Effectiveness) Project.	Circ Cardiovasc Qual Outcomes. 2020 Jun;13(6):e006313. doi: 10.1161/CIRCOUTCOMES.119.006313. Epub 2020 Jun 4.	Liu J	Circ Cardiovasc Qual Outcomes	2020	2020-05-06	PMC7299757	NIHMS1587894	10.1161/CIRCOUTCOMES.119.006313
32492154	Perspective: Do Fasting, Caloric Restriction, and Diets Increase Sensitivity to Radiotherapy? A Literature Review	Icard P, Ollivier L, Forgez P, Otz J, Alifano M, Fournel L, Loi M, Thariat J.	Adv Nutr. 2020 Sep 1;11(5):1089-1101. doi: 10.1093/advances/nmaa062.	Icard P	Adv Nutr	2020	2020-04-06	PMC7490158		10.1093/advances/nmaa062
32485641	Caloric restriction, resting metabolic rate and cognitive performance in Non-obese adults: A post-hoc analysis from CALERIE study	Grigolon RB, Brietzke E, Trevizol AP, McIntyre RS, Mansur RB.	J Psychiatr Res. 2020 Sep;128:16-22. doi: 10.1016/j.jpsychires.2020.05.018. Epub 2020 May 25.	Grigolon RB	J Psychiatr Res	2020	2020-03-06			10.1016/j.jpsychires.2020.05.018
32484877	Very-Low-Calorie Ketogenic Diets With Whey, Vegetable, or Animal Protein in Patients With Obesity: A Randomized Pilot Study	Basciani S, Camajani E, Contini S, Persichetti A, Risi R, Bertoldi L, Strigari L, Prossomariti G, Watanabe M, Mariani S, Lubrano C, Genco A, Spera G, Gnessi L.	J Clin Endocrinol Metab. 2020 Sep 1;105(9):dgaa336. doi: 10.1210/clinem/dgaa336.	Basciani S	J Clin Endocrinol Metab	2020	2020-03-06			10.1210/clinem/dgaa336
32485778	Whole-body Electromyostimulation plus Caloric Restriction in Metabolic Syndrome	Bellia A, Ruscello B, Bolognino R, Briotti G, Gabrielli PR, Silvestri A, Rosazza C, Ambruoso F, Lombardo M, Bernardini A, Calabrese C, Lauro D, D'Ottavio S.	Int J Sports Med. 2020 Oct;41(11):751-758. doi: 10.1055/a-1171-2003. Epub 2020 Jun 2.	Bellia A	Int J Sports Med	2020	2020-03-06			10.1055/a-1171-2003
32482712	Association between Subcutaneous Adipose Tissue Inflammation, Insulin Resistance, and Calorie Restriction in Obese Females	Sbierski-Kind J, Mai K, Kath J, Jurisch A, Streitz M, Kuchenbecker L, Babel N, Nienen M, Jürchott K, Spranger L, Jumpertz von Schwartzenberg R, Decker AM, Krüger U, Volk HD, Spranger J.	J Immunol. 2020 Jul 1;205(1):45-55. doi: 10.4049/jimmunol.2000108. Epub 2020 Jun 1.	Sbierski-Kind J	J Immunol	2020	2020-03-06			10.4049/jimmunol.2000108
32480254	Assessing successful completion of calorie restriction studies for the prevention and treatment of cancer	Champ CE, Klement RJ.	Nutrition. 2020 Oct;78:110829. doi: 10.1016/j.nut.2020.110829. Epub 2020 Apr 19.	Champ CE	Nutrition	2020	2020-02-06			10.1016/j.nut.2020.110829
32473928	Short-term interval exercise suppresses acylated ghrelin and hunger during caloric restriction in women with obesity	Malin SK, Heiston EM, Gilbertson NM, Eichner NZM.	Physiol Behav. 2020 Sep 1;223:112978. doi: 10.1016/j.physbeh.2020.112978. Epub 2020 May 29.	Malin SK	Physiol Behav	2020	2020-01-06			10.1016/j.physbeh.2020.112978
32475085	The Weight Optimization Revamping Lifestyle using the Dietary Guidelines (WORLD) Study: Sustained Weight Loss Over 12 Months	Psota TL, Tindall AM, Lohse B, Miller PE, Petersen KS, Kris-Etherton PM.	Obesity (Silver Spring). 2020 Jul;28(7):1235-1244. doi: 10.1002/oby.22824. Epub 2020 May 31.	Psota TL	Obesity (Silver Spring)	2020	2020-01-06	PMC7383737		10.1002/oby.22824
32434372	Efficacy of a Short-Term Low-Calorie Diet in Overweight and Obese Patients with Chronic Sciatica: A Randomized Controlled Trial	Safari MB, Nozad A, Ghaffari F, Ghavamzadeh S, Alijaniha F, Naseri M.	J Altern Complement Med. 2020 Jun;26(6):508-514. doi: 10.1089/acm.2019.0360. Epub 2020 May 20.	Safari MB	J Altern Complement Med	2020	22/05/2020			10.1089/acm.2019.0360
32428159	Impact of intermittent fasting on body weight in overweight and obese individuals	Lima CHR, Oliveira IKF, Frota KMG, Carvalho CMRG, Paiva AA, Campelo V, Martins MDCCE.	Rev Assoc Med Bras (1992). 2020 May 15;66(2):222-226. doi: 10.1590/1806-9282.66.2.222.	Lima CHR	Rev Assoc Med Bras (1992)	2020	20/05/2020			10.1590/1806-9282.66.2.222
32408153	Safety and feasibility of various fasting-mimicking diets among people with multiple sclerosis	Roman SN, Fitzgerald KC, Beier M, Mowry EM.	Mult Scler Relat Disord. 2020 Jul;42:102149. doi: 10.1016/j.msard.2020.102149. Epub 2020 May 6.	Roman SN	Mult Scler Relat Disord	2020	15/05/2020			10.1016/j.msard.2020.102149
32404008	Effects of a Hypercaloric and Hypocaloric Diet on Insulin-Induced Microvascular Recruitment, Glucose Uptake, and Lipolysis in Healthy Lean Men	Emanuel AL, Meijer RI, Woerdeman J, van Raalte DH, Diamant M, Kramer MHH, Serlie MJ, Eringa EC, Serné EH.	Arterioscler Thromb Vasc Biol. 2020 Jul;40(7):1695-1704. doi: 10.1161/ATVBAHA.120.314129. Epub 2020 May 14.	Emanuel AL	Arterioscler Thromb Vasc Biol	2020	15/05/2020			10.1161/ATVBAHA.120.314129
32394448	Protective effect of quercetin in combination with caloric restriction against oxidative stress-induced cell death of Saccharomyces cerevisiae cells	Alugoju P, Periyasamy L, Dyavaiah M.	Lett Appl Microbiol. 2020 Sep;71(3):272-279. doi: 10.1111/lam.13313. Epub 2020 Jun 15.	Alugoju P	Lett Appl Microbiol	2020	13/05/2020			10.1111/lam.13313
32384144	A Weight Loss Intervention Augmented by a Wearable Device in Rural Older Adults With Obesity: A Feasibility Study	Batsis JA, Petersen CL, Clark MM, Cook SB, Lopez-Jimenez F, Al-Nimr RI, Pidgeon D, Kotz D, Mackenzie TA, Bartels SJ.	J Gerontol A Biol Sci Med Sci. 2021 Jan 1;76(1):95-100. doi: 10.1093/gerona/glaa115.	Batsis JA	J Gerontol A Biol Sci Med Sci	2021	2020-09-05	PMC7756700		10.1093/gerona/glaa115
32370212	Short-Term Physiological Effects of a Very Low-Calorie Ketogenic Diet: Effects on Adiponectin Levels and Inflammatory States	Monda V, Polito R, Lovino A, Finaldi A, Valenzano A, Nigro E, Corso G, Sessa F, Asmundo A, Nunno ND, Cibelli G, Messina G.	Int J Mol Sci. 2020 May 2;21(9):3228. doi: 10.3390/ijms21093228.	Monda V	Int J Mol Sci	2020	2020-07-05	PMC7246656		10.3390/ijms21093228
32369989	Effectiveness of Mediterranean Diet Implementation in Dry Eye Parameters: A Study of PREDIMED-PLUS Trial	Molina-Leyva I, Molina-Leyva A, Riquelme-Gallego B, Cano-Ibáñez N, García-Molina L, Bueno-Cavanillas A.	Nutrients. 2020 May 1;12(5):1289. doi: 10.3390/nu12051289.	Molina-Leyva I	Nutrients	2020	2020-07-05	PMC7282256		10.3390/nu12051289
32350172	Effect of a Moderate Carbohydrate-Restricted Diet on DPP-4 Inhibitor Action among Individuals with Type 2 Diabetes Mellitus: A 6-Month Intervention Study	Kobayashi M, Miura T, Miura K, Hiroyama N, Akashi K.	J Nutr Sci Vitaminol (Tokyo). 2020;66(2):114-118. doi: 10.3177/jnsv.66.114.	Kobayashi M	J Nutr Sci Vitaminol (Tokyo)	2020	2020-01-05			10.3177/jnsv.66.114
32340903	Link between gut microbiota and health outcomes in inulin -treated obese patients: Lessons from the Food4Gut multicenter randomized placebo-controlled trial	Hiel S, Gianfrancesco MA, Rodriguez J, Portheault D, Leyrolle Q, Bindels LB, Gomes da Silveira Cauduro C, Mulders MDGH, Zamariola G, Azzi AS, Kalala G, Pachikian BD, Amadieu C, Neyrinck AM, Loumaye A, Cani PD, Lanthier N, Trefois P, Klein O, Luminet O, Bindelle J, Paquot N, Cnop M, Thissen JP, Delzenne NM.	Clin Nutr. 2020 Dec;39(12):3618-3628. doi: 10.1016/j.clnu.2020.04.005. Epub 2020 Apr 13.	Hiel S	Clin Nutr	2020	29/04/2020			10.1016/j.clnu.2020.04.005
32335159	Supplementation with a putative calorie restriction mimetic micronutrient blend increases glutathione concentrations and improves neuroenergetics in brain of healthy middle-aged men and women	Mastaloudis A, Sheth C, Hester SN, Wood SM, Prescot A, McGlade E, Renshaw PF, Yurgelun-Todd DA.	Free Radic Biol Med. 2020 Jun;153:112-121. doi: 10.1016/j.freeradbiomed.2020.04.017. Epub 2020 Apr 23.	Mastaloudis A	Free Radic Biol Med	2020	27/04/2020			10.1016/j.freeradbiomed.2020.04.017
32332617	Effectiveness of a multifactorial intervention, consisting of self-management of antihypertensive medication, self-measurement of blood pressure, hypocaloric and low sodium diet, and physical exercise, in patients with uncontrolled hypertension taking 2 or more antihypertensive drugs: The MEDICHY study	Unda Villafuerte F, Llobera Cànaves J, Lorente Montalvo P, Moreno Sancho ML, Oliver Oliver B, Bassante Flores P, Estela Mantolan A, Pou Bordoy J, Rodríguez Ruiz T, Requena Hernández A, Leiva A, Torrent Quetglas M, Coll Benejam JM, D'Agosto Forteza P, Rigo Carratalà F; and the Medichy Group.	Medicine (Baltimore). 2020 Apr;99(17):e19769. doi: 10.1097/MD.0000000000019769.	Unda Villafuerte F	Medicine (Baltimore)	2020	26/04/2020	PMC7220514		10.1097/MD.0000000000019769
32316561	Four Weeks of Time-Restricted Feeding Combined with Resistance Training Does Not Differentially Influence Measures of Body Composition, Muscle Performance, Resting Energy Expenditure, and Blood Biomarkers	Stratton MT, Tinsley GM, Alesi MG, Hester GM, Olmos AA, Serafini PR, Modjeski AS, Mangine GT, King K, Savage SN, Webb AT, VanDusseldorp TA.	Nutrients. 2020 Apr 17;12(4):1126. doi: 10.3390/nu12041126.	Stratton MT	Nutrients	2020	23/04/2020	PMC7231047		10.3390/nu12041126
32308756	Combination therapy with ropivacaine-loaded liposomes and nutrient deprivation for simultaneous cancer therapy and cancer pain relief	Zhang J, Zhu S, Tan Q, Cheng D, Dai Q, Yang Z, Zhang L, Li F, Zuo Y, Dai W, Chen L, Gu E, Xu G, Wei Z, Cao Y, Liu X.	Theranostics. 2020 Mar 26;10(11):4885-4899. doi: 10.7150/thno.43932. eCollection 2020.	Zhang J	Theranostics	2020	21/04/2020	PMC7163441		10.7150/thno.43932
32299674	A Public Health Messaging Campaign to Reduce Caloric Intake: Feedback From Expert Stakeholders	Gonzalez-Nahm S, Bhatti AM, Ames ML, Zaltz D, Benjamin-Neelon SE.	J Nutr Educ Behav. 2020 Jun;52(6):595-606. doi: 10.1016/j.jneb.2020.02.018. Epub 2020 Apr 13.	Gonzalez-Nahm S	J Nutr Educ Behav	2020	18/04/2020			10.1016/j.jneb.2020.02.018
32279030	Effects of using high-intensity interval training and calorie restriction in different orders on metabolic syndrome: A randomized controlled trial	So R, Matsuo T.	Nutrition. 2020 Jul-Aug;75-76:110666. doi: 10.1016/j.nut.2019.110666. Epub 2019 Dec 6.	So R	Nutrition	2020	13/04/2020			10.1016/j.nut.2019.110666
32271991	Lifestyle-Intervention-Induced Reduction of Abdominal Fat Is Reflected by a Decreased Circulating Glycerol Level and an Increased HDL Diameter	Beekman M, Schutte BAM, Akker EBVD, Noordam R, Dibbets-Schneider P, de Geus-Oei LF, Deelen J, Rest OV, Heemst DV, Feskens EJM, Slagboom PE.	Mol Nutr Food Res. 2020 May;64(10):e1900818. doi: 10.1002/mnfr.201900818. Epub 2020 Apr 23.	Beekman M	Mol Nutr Food Res	2020	2020-10-04	PMC7317364		10.1002/mnfr.201900818
32272119	12 days of in vivo caloric reduction can improve important parameters of aging in humans	Schöller-Mann A, Matt K, Schniertshauer D, Hochecker B, Bergemann J.	Mech Ageing Dev. 2020 Jun;188:111238. doi: 10.1016/j.mad.2020.111238. Epub 2020 Apr 6.	Schöller-Mann A	Mech Ageing Dev	2020	2020-10-04			10.1016/j.mad.2020.111238
32249301	Effect of dairy intake with or without energy restriction on body composition of adults: overview of systematic reviews and meta-analyses of randomized controlled trials	López-Sobaler AM, Aparicio A, López Díaz-Ufano ML, Ortega RM, Álvarez-Bueno C.	Nutr Rev. 2020 Nov 1;78(11):901-913. doi: 10.1093/nutrit/nuaa003.	López-Sobaler AM	Nutr Rev	2020	2020-07-04			10.1093/nutrit/nuaa003
32246293	Adherence to low-calorie and low-sugar diets is uniquely associated with distinct facets of appearance/weight-related smoking motivations	Coniglio KA, Rosen R, Burr EK, Farris SG.	J Behav Med. 2020 Jun;43(3):487-492. doi: 10.1007/s10865-020-00149-y. Epub 2020 Apr 3.	Coniglio KA	J Behav Med	2020	2020-05-04			10.1007/s10865-020-00149-y
32236752	Caloric restriction induces anabolic resistance to resistance exercise	Murphy C, Koehler K.	Eur J Appl Physiol. 2020 May;120(5):1155-1164. doi: 10.1007/s00421-020-04354-0. Epub 2020 Mar 31.	Murphy C	Eur J Appl Physiol	2020	2020-03-04	PMC8233264		10.1007/s00421-020-04354-0
32235930	Effects of underfeeding and oral vancomycin on gut microbiome and nutrient absorption in humans	Basolo A, Hohenadel M, Ang QY, Piaggi P, Heinitz S, Walter M, Walter P, Parrington S, Trinidad DD, von Schwartzenberg RJ, Turnbaugh PJ, Krakoff J.	Nat Med. 2020 Apr;26(4):589-598. doi: 10.1038/s41591-020-0801-z. Epub 2020 Mar 23.	Basolo A	Nat Med	2020	2020-03-04			10.1038/s41591-020-0801-z
32235773	Incorporating Milk Protein Isolate into an Energy-Restricted Western-Style Eating Pattern Augments Improvements in Blood Pressure and Triglycerides, but Not Body Composition Changes in Adults Classified as Overweight or Obese: A Randomized Controlled Trial	Hudson JL, Zhou J, Kim JE, Campbell WW.	Nutrients. 2020 Mar 22;12(3):851. doi: 10.3390/nu12030851.	Hudson JL	Nutrients	2020	2020-03-04	PMC7146470		10.3390/nu12030851
32230858	Calorie Restriction Improves Physical Performance and Modulates the Antioxidant and Inflammatory Responses to Acute Exercise	Capó X, Martorell M, Ferrer MD, Sureda A, Pons V, Domingo JC, Drobnic F, Martínez-Rodríguez A, Leyva-Vela B, Sarabia JM, Herranz-López M, Roche E, Tur JA, Pons A.	Nutrients. 2020 Mar 27;12(4):930. doi: 10.3390/nu12040930.	Capó X	Nutrients	2020	2020-02-04	PMC7230395		10.3390/nu12040930
32230987	Randomised Double-Blind Placebo-Controlled Trial of Inulin with Metronidazole in Non-Alcoholic Fatty Liver Disease (NAFLD)	Chong CYL, Orr D, Plank LD, Vatanen T, O'Sullivan JM, Murphy R.	Nutrients. 2020 Mar 27;12(4):937. doi: 10.3390/nu12040937.	Chong CYL	Nutrients	2020	2020-02-04	PMC7230525		10.3390/nu12040937
32220917	Effects of Low-Energy Diet or Exercise on Cardiovascular Function in Working-Age Adults With Type 2 Diabetes: A Prospective, Randomized, Open-Label, Blinded End Point Trial	Gulsin GS, Swarbrick DJ, Athithan L, Brady EM, Henson J, Baldry E, Argyridou S, Jaicim NB, Squire G, Walters Y, Marsh AM, McAdam J, Parke KS, Biglands JD, Yates T, Khunti K, Davies MJ, McCann GP.	Diabetes Care. 2020 Jun;43(6):1300-1310. doi: 10.2337/dc20-0129. Epub 2020 Mar 27.	Gulsin GS	Diabetes Care	2020	30/03/2020			10.2337/dc20-0129
32218430	The different daily distribution of proteins does not influence the variations in body composition in a sample of subjects undergoing a low-calorie Mediterranean-type diet	Lombardo M, Bellia C, Aulisa G, Pratesi A, Perrone MA, Padua E, Iellamo F, Caprio M, Bellia A.	Minerva Gastroenterol (Torino). 2021 Jun;67(2):183-189. doi: 10.23736/S2724-5985.20.02694-X. Epub 2020 Mar 24.	Lombardo M	Minerva Gastroenterol (Torino)	2021	29/03/2020			10.23736/S2724-5985.20.02694-X
32217148	Oleoylethanolamide supplementation in obese patients newly diagnosed with non-alcoholic fatty liver disease: Effects on metabolic parameters, anthropometric indices, and expression of PPAR-α, UCP1, and UCP2 genes	Tutunchi H, Ostadrahimi A, Saghafi-Asl M, Hosseinzadeh-Attar MJ, Shakeri A, Asghari-Jafarabadi M, Roshanravan N, Farrin N, Naemi M, Hasankhani M.	Pharmacol Res. 2020 Jun;156:104770. doi: 10.1016/j.phrs.2020.104770. Epub 2020 Mar 23.	Tutunchi H	Pharmacol Res	2020	29/03/2020			10.1016/j.phrs.2020.104770
32204895	MRI estimated changes in visceral adipose tissue and liver fat fraction in patients with obesity during a very low-calorie-ketogenic diet compared to a standard low-calorie diet	Cunha GM, Correa de Mello LL, Hasenstab KA, Spina L, Bussade I, Prata Mesiano JM, Coutinho W, Guzman G, Sajoux I.	Clin Radiol. 2020 Jul;75(7):526-532. doi: 10.1016/j.crad.2020.02.014. Epub 2020 Mar 20.	Cunha GM	Clin Radiol	2020	25/03/2020			10.1016/j.crad.2020.02.014
32199696	Intermittent fasting 5:2 diet: What is the macronutrient and micronutrient intake and composition?	Scholtens EL, Krebs JD, Corley BT, Hall RM.	Clin Nutr. 2020 Nov;39(11):3354-3360. doi: 10.1016/j.clnu.2020.02.022. Epub 2020 Feb 22.	Scholtens EL	Clin Nutr	2020	23/03/2020			10.1016/j.clnu.2020.02.022
32180431	Beneficial impact of exercise on bone mass in individuals under calorie restriction: a systematic review and Meta-analysis of randomized clinical trials	Yarizadeh H, Asadi S, Baharlooi H, Setayesh L, Kakavandi NR, Hambly C, Djafarian K, Mirzaei K.	Crit Rev Food Sci Nutr. 2021;61(4):553-565. doi: 10.1080/10408398.2020.1739620. Epub 2020 Mar 17.	Yarizadeh H	Crit Rev Food Sci Nutr	2021	18/03/2020			10.1080/10408398.2020.1739620
32156010	Differential Impact of Calcium and Vitamin D on Body Composition Changes in Post-Menopausal Women Following a Restricted Energy Diet and Exercise Program	Kerksick CM, Roberts MD, Campbell BI, Galbreath MM, Taylor LW, Wilborn CD, Lee A, Dove J, Bunn JW, Rasmussen CJ, Kreider RB.	Nutrients. 2020 Mar 7;12(3):713. doi: 10.3390/nu12030713.	Kerksick CM	Nutrients	2020	2020-12-03	PMC7146554		10.3390/nu12030713
32144378	Changes in body weight, adherence, and appetite during 2 years of calorie restriction: the CALERIE 2 randomized clinical trial	Dorling JL, Das SK, Racette SB, Apolzan JW, Zhang D, Pieper CF, Martin CK; CALERIE Study Group.	Eur J Clin Nutr. 2020 Aug;74(8):1210-1220. doi: 10.1038/s41430-020-0593-8. Epub 2020 Mar 6.	Dorling JL	Eur J Clin Nutr	2020	2020-08-03	PMC7415503	NIHMS1563564	10.1038/s41430-020-0593-8
32144896	Precision Medicine Approach to Develop and Internally Validate Optimal Exercise and Weight-Loss Treatments for Overweight and Obese Adults With Knee Osteoarthritis: Data From a Single-Center Randomized Trial	Jiang X, Nelson AE, Cleveland RJ, Beavers DP, Schwartz TA, Arbeeva L, Alvarez C, Callahan LF, Messier S, Loeser R, Kosorok MR.	Arthritis Care Res (Hoboken). 2021 May;73(5):693-701. doi: 10.1002/acr.24179.	Jiang X	Arthritis Care Res (Hoboken)	2021	2020-08-03	PMC7483572	NIHMS1574734	10.1002/acr.24179
32139253	Dietary patterns and cardiovascular disease in Australian adults: Findings from the 2011-12 Australian Health Survey	Wong MMH, Grech A, Louie JCY.	Nutr Metab Cardiovasc Dis. 2020 May 7;30(5):738-748. doi: 10.1016/j.numecd.2020.02.002. Epub 2020 Feb 12.	Wong MMH	Nutr Metab Cardiovasc Dis	2020	2020-07-03			10.1016/j.numecd.2020.02.002
32120990	Effect of Caloric Restriction on BMI, Gut Microbiota, and Blood Amino Acid Levels in Non-Obese Adults	Zou H, Wang D, Ren H, Cai K, Chen P, Fang C, Shi Z, Zhang P, Wang J, Yang H, Zhong H.	Nutrients. 2020 Feb 27;12(3):631. doi: 10.3390/nu12030631.	Zou H	Nutrients	2020	2020-04-03	PMC7146580		10.3390/nu12030631
32121111	Energy Restriction Enhances Adult Hippocampal Neurogenesis-Associated Memory after Four Weeks in an Adult Human Population with Central Obesity; a Randomized Controlled Trial	Kim C, Pinto AM, Bordoli C, Buckner LP, Kaplan PC, Del Arenal IM, Jeffcock EJ, Hall WL, Thuret S.	Nutrients. 2020 Feb 28;12(3):638. doi: 10.3390/nu12030638.	Kim C	Nutrients	2020	2020-04-03	PMC7146388		10.3390/nu12030638
32109414	Caloric Restriction Reprograms the Single-Cell Transcriptional Landscape of Rattus Norvegicus Aging	Ma S, Sun S, Geng L, Song M, Wang W, Ye Y, Ji Q, Zou Z, Wang S, He X, Li W, Esteban CR, Long X, Guo G, Chan P, Zhou Q, Belmonte JCI, Zhang W, Qu J, Liu GH.	Cell. 2020 Mar 5;180(5):984-1001.e22. doi: 10.1016/j.cell.2020.02.008. Epub 2020 Feb 27.	Ma S	Cell	2020	29/02/2020			10.1016/j.cell.2020.02.008
32090119	Efficacy of Intermittent or Continuous Very Low-Energy Diets in Overweight and Obese Individuals with Type 2 Diabetes Mellitus: A Systematic Review and Meta-Analyses	Huang YS, Zheng Q, Yang H, Fu X, Zhang X, Xia C, Zhu Z, Liu YN, Liu WJ.	J Diabetes Res. 2020 Jan 27;2020:4851671. doi: 10.1155/2020/4851671. eCollection 2020.	Huang YS	J Diabetes Res	2020	25/02/2020	PMC7008267		10.1155/2020/4851671
32080796	Confusion in the nomenclature of ketogenic diets blurs evidence	Trimboli P, Castellana M, Bellido D, Casanueva FF.	Rev Endocr Metab Disord. 2020 Mar;21(1):1-3. doi: 10.1007/s11154-020-09546-9.	Trimboli P	Rev Endocr Metab Disord	2020	22/02/2020			10.1007/s11154-020-09546-9
32075050	A Novel Micronutrient Blend Mimics Calorie Restriction Transcriptomics in Multiple Tissues of Mice and Increases Lifespan and Mobility in C. elegans	Serna E, Mastaloudis A, Martorell P, Wood SM, Hester SN, Bartlett M, Prolla TA, Viña J.	Nutrients. 2020 Feb 14;12(2):486. doi: 10.3390/nu12020486.	Serna E	Nutrients	2020	21/02/2020	PMC7071149		10.3390/nu12020486
32073608	Twice as High Diet-Induced Thermogenesis After Breakfast vs Dinner On High-Calorie as Well as Low-Calorie Meals	Richter J, Herzog N, Janka S, Baumann T, Kistenmacher A, Oltmanns KM.	J Clin Endocrinol Metab. 2020 Mar 1;105(3):dgz311. doi: 10.1210/clinem/dgz311.	Richter J	J Clin Endocrinol Metab	2020	20/02/2020			10.1210/clinem/dgz311
32074122	Analysis of the percentages of monocyte subsets and ILC2s, their relationships with metabolic variables and response to hypocaloric restriction in obesity	Figueroa-Vega N, Marín-Aragón CI, López-Aguilar I, Ibarra-Reynoso L, Pérez-Luque E, Malacara JM.	PLoS One. 2020 Feb 19;15(2):e0228637. doi: 10.1371/journal.pone.0228637. eCollection 2020.	Figueroa-Vega N	PLoS One	2020	20/02/2020	PMC7029876		10.1371/journal.pone.0228637
32067341	Implementation of a very low calorie diet program into the pre-operative model of care for obese general elective surgery patients: Outcomes of a feasibility randomised control trial	Hollis G, Franz R, Bauer J, Bell J.	Nutr Diet. 2020 Nov;77(5):490-498. doi: 10.1111/1747-0080.12601. Epub 2020 Feb 17.	Hollis G	Nutr Diet	2020	19/02/2020			10.1111/1747-0080.12601
32057567	A circadian rhythm-related MTNR1B genetic variant (rs10830963) modulate body weight change and insulin resistance after 9 months of a high protein/low carbohydrate vs a standard hypocaloric diet	de Luis DA, Izaola O, Primo D, Aller R.	J Diabetes Complications. 2020 Apr;34(4):107534. doi: 10.1016/j.jdiacomp.2020.107534. Epub 2020 Jan 13.	de Luis DA	J Diabetes Complications	2020	15/02/2020			10.1016/j.jdiacomp.2020.107534
32057716	Rationale and protocol for a randomized controlled trial comparing daily calorie restriction versus intermittent fasting to improve glycaemia in individuals at increased risk of developing type 2 diabetes	Teong XT, Liu K, Hutchison AT, Liu B, Feinle-Bisset C, Wittert GA, Lange K, Vincent AD, Heilbronn LK.	Obes Res Clin Pract. 2020 Mar-Apr;14(2):176-183. doi: 10.1016/j.orcp.2020.01.005. Epub 2020 Feb 11.	Teong XT	Obes Res Clin Pract	2020	15/02/2020			10.1016/j.orcp.2020.01.005
32053988	Changes in Plasma Short-Chain Fatty Acid Levels after Dietary Weight Loss Among Overweight and Obese Adults over 50 Weeks	Sowah SA, Hirche F, Milanese A, Johnson TS, Grafetstätter M, Schübel R, Kirsten R, Ulrich CM, Kaaks R, Zeller G, Kühn T, Stangl GI.	Nutrients. 2020 Feb 11;12(2):452. doi: 10.3390/nu12020452.	Sowah SA	Nutrients	2020	15/02/2020	PMC7071291		10.3390/nu12020452
32020691	Pragmatic management of low-energy diets in people with type 2 diabetes in primary care: a decision aid for clinicians	Baldry EL, Davies MJ, Khunti K, Webb DR.	Diabet Med. 2020 May;37(5):747-751. doi: 10.1111/dme.14265. Epub 2020 Feb 20.	Baldry EL	Diabet Med	2020	2020-06-02			10.1111/dme.14265
32012661	Very Low-Calorie Ketogenic Diet: A Safe and Effective Tool for Weight Loss in Patients With Obesity and Mild Kidney Failure	Bruci A, Tuccinardi D, Tozzi R, Balena A, Santucci S, Frontani R, Mariani S, Basciani S, Spera G, Gnessi L, Lubrano C, Watanabe M.	Nutrients. 2020 Jan 27;12(2):333. doi: 10.3390/nu12020333.	Bruci A	Nutrients	2020	2020-05-02	PMC7071259		10.3390/nu12020333
32012996	The Relationship between Circulating Acetate and Human Insulin Resistance before and after Weight Loss in the DiOGenes Study	González Hernández MA, Canfora EE, Pasmans K, Astrup A, Saris WHM, Blaak EE.	Nutrients. 2020 Jan 28;12(2):339. doi: 10.3390/nu12020339.	González Hernández MA	Nutrients	2020	2020-05-02	PMC7071284		10.3390/nu12020339
32007334	Associations of telomere length with anthropometric and glucose changes after a lifestyle intervention in abdominal obese children	Morell-Azanza L, Ojeda-Rodríguez A, Azcona-SanJulián MC, Zalba G, Marti A.	Nutr Metab Cardiovasc Dis. 2020 Apr 12;30(4):694-700. doi: 10.1016/j.numecd.2019.12.002. Epub 2019 Dec 10.	Morell-Azanza L	Nutr Metab Cardiovasc Dis	2020	2020-03-02			10.1016/j.numecd.2019.12.002
32003649	The alternate-day fasting diet is a more effective approach than a calorie restriction diet on weight loss and hs-CRP levels	Razavi R, Parvaresh A, Abbasi B, Yaghoobloo K, Hassanzadeh A, Mohammadifard N, Clark CCT, Morteza Safavi S.	Int J Vitam Nutr Res. 2021 Jun;91(3-4):242-250. doi: 10.1024/0300-9831/a000623. Epub 2020 Jan 31.	Razavi R	Int J Vitam Nutr Res	2021	2020-01-02			10.1024/0300-9831/a000623
31992372	Flaxseed oil in the context of a weight loss programme ameliorates fatty liver grade in patients with non-alcoholic fatty liver disease: a randomised double-blind controlled trial	Rezaei S, Sasani MR, Akhlaghi M, Kohanmoo A.	Br J Nutr. 2020 May 14;123(9):994-1002. doi: 10.1017/S0007114520000318. Epub 2020 Jan 29.	Rezaei S	Br J Nutr	2020	30/01/2020			10.1017/S0007114520000318
31995765	Human Bone Marrow Is Comprised of Adipocytes with Specific Lipid Metabolism	Attané C, Estève D, Chaoui K, Iacovoni JS, Corre J, Moutahir M, Valet P, Schiltz O, Reina N, Muller C.	Cell Rep. 2020 Jan 28;30(4):949-958.e6. doi: 10.1016/j.celrep.2019.12.089.	Attané C	Cell Rep	2020	30/01/2020			10.1016/j.celrep.2019.12.089
31987116	Effect of a low energy diet, containing a high protein, probiotic condensed yogurt, on biochemical and anthropometric measurements among women with overweight/obesity: A randomised controlled trial	Razmpoosh E, Zare S, Fallahzadeh H, Safi S, Nadjarzadeh A.	Clin Nutr ESPEN. 2020 Feb;35:194-200. doi: 10.1016/j.clnesp.2019.10.001. Epub 2019 Nov 21.	Razmpoosh E	Clin Nutr ESPEN	2020	29/01/2020			10.1016/j.clnesp.2019.10.001
31983513	Sleep Extension Increases the Effect of Caloric Restriction Over Body Weight and Improves the Chronic Low-Grade Inflammation in Adolescents With Obesity	Moreno-Frías C, Figueroa-Vega N, Malacara JM.	J Adolesc Health. 2020 May;66(5):575-581. doi: 10.1016/j.jadohealth.2019.11.301. Epub 2020 Jan 23.	Moreno-Frías C	J Adolesc Health	2020	28/01/2020			10.1016/j.jadohealth.2019.11.301
31983316	Dietary restriction increases protective gut bacteria to rescue lethal methotrexate-induced intestinal toxicity	Tang D, Zeng T, Wang Y, Cui H, Wu J, Zou B, Tao Z, Zhang L, Garside GB, Tao S.	Gut Microbes. 2020 Nov 9;12(1):1714401. doi: 10.1080/19490976.2020.1714401. Epub 2020 Jan 26.	Tang D	Gut Microbes	2020	28/01/2020	PMC7524152		10.1080/19490976.2020.1714401
31982367	Molecular and Functional Networks Linked to Sarcopenia Prevention by Caloric Restriction in Rhesus Monkeys	Rhoads TW, Clark JP, Gustafson GE, Miller KN, Conklin MW, DeMuth TM, Berres ME, Eliceiri KW, Vaughan LK, Lary CW, Beasley TM, Colman RJ, Anderson RM.	Cell Syst. 2020 Feb 26;10(2):156-168.e5. doi: 10.1016/j.cels.2019.12.002. Epub 2020 Jan 22.	Rhoads TW	Cell Syst	2020	27/01/2020	PMC7047532	NIHMS1068808	10.1016/j.cels.2019.12.002
31982191	Effects of diet-induced weight loss on postprandial vascular function after consumption of a mixed meal: Results of a randomized controlled trial with abdominally obese men	Joris PJ, Plat J, Kusters YHAM, Houben AJHM, Stehouwer CDA, Schalkwijk CG, Mensink RP.	Clin Nutr. 2020 Oct;39(10):2998-3004. doi: 10.1016/j.clnu.2020.01.006. Epub 2020 Jan 13.	Joris PJ	Clin Nutr	2020	27/01/2020			10.1016/j.clnu.2020.01.006
31975053	Short-term time-restricted feeding is safe and feasible in non-obese healthy midlife and older adults	Martens CR, Rossman MJ, Mazzo MR, Jankowski LR, Nagy EE, Denman BA, Richey JJ, Johnson SA, Ziemba BP, Wang Y, Peterson CM, Chonchol M, Seals DR.	Geroscience. 2020 Apr;42(2):667-686. doi: 10.1007/s11357-020-00156-6. Epub 2020 Jan 23.	Martens CR	Geroscience	2020	25/01/2020	PMC7206473		10.1007/s11357-020-00156-6
31973116	Aging and Caloric Restriction Modulate the DNA Methylation Profile of the Ribosomal RNA Locus in Human and Rat Liver	Gensous N, Ravaioli F, Pirazzini C, Gramignoli R, Ellis E, Storci G, Capri M, Strom S, Laconi E, Franceschi C, Garagnani P, Marongiu F, Bacalini MG.	Nutrients. 2020 Jan 21;12(2):277. doi: 10.3390/nu12020277.	Gensous N	Nutrients	2020	25/01/2020	PMC7070571		10.3390/nu12020277
31961489	Effectiveness of Stepped-Care Intervention in Overweight and Obese Patients With Medial Tibiofemoral Osteoarthritis: A Randomized Controlled Trial	Robbins SR, Melo LRS, Urban H, Deveza LA, Asher R, Johnson VL, Hunter DJ.	Arthritis Care Res (Hoboken). 2021 Apr;73(4):520-530. doi: 10.1002/acr.24148.	Robbins SR	Arthritis Care Res (Hoboken)	2021	22/01/2020			10.1002/acr.24148
31954847	Hypoenergetic feeding does not improve outcomes in critically ill patients with premorbid obesity: a post hoc analysis of a randomized controlled trial	Charles EJ, Kane WJ, Willcutts KF, O'Donnell KB, Petroze RT, Sawyer RG.	Nutr Res. 2020 Feb;74:71-77. doi: 10.1016/j.nutres.2019.11.011. Epub 2019 Nov 30.	Charles EJ	Nutr Res	2020	20/01/2020			10.1016/j.nutres.2019.11.011
31950141	Associations between the proportion of fat-free mass loss during weight loss, changes in appetite, and subsequent weight change: results from a randomized 2-stage dietary intervention trial	Turicchi J, O'Driscoll R, Finlayson G, Duarte C, Hopkins M, Martins N, Michalowska J, Larsen TM, van Baak MA, Astrup A, Stubbs RJ.	Am J Clin Nutr. 2020 Mar 1;111(3):536-544. doi: 10.1093/ajcn/nqz331.	Turicchi J	Am J Clin Nutr	2020	18/01/2020			10.1093/ajcn/nqz331
31945404	Effect of metabolic state on implicit and explicit responses to food in young healthy females	Juvonen K, Lapveteläinen A, Närväinen J, Absetz P, Kantanen T, Kolehmainen M, Sinikallio S, Pihlajamäki J, Karhunen L.	Appetite. 2020 May 1;148:104593. doi: 10.1016/j.appet.2020.104593. Epub 2020 Jan 13.	Juvonen K	Appetite	2020	17/01/2020			10.1016/j.appet.2020.104593
31937907	Impact of intermittent vs. continuous energy restriction on weight and cardiometabolic factors: a 12-month follow-up	Headland ML, Clifton PM, Keogh JB.	Int J Obes (Lond). 2020 Jun;44(6):1236-1242. doi: 10.1038/s41366-020-0525-7. Epub 2020 Jan 14.	Headland ML	Int J Obes (Lond)	2020	16/01/2020			10.1038/s41366-020-0525-7
31932207	Plasma ghrelin levels after percutaneous electrical nerve stimulation of dermatome T6 for the treatment of obesity	Giner-Bernal L, Ruiz-Tovar J, Violeta J, Mercader M, Miralles J, Calpena R, Arroyo A.	Endocrinol Diabetes Nutr (Engl Ed). 2020 Mar;67(3):179-185. doi: 10.1016/j.endinu.2019.04.009. Epub 2020 Jan 10.	Giner-Bernal L	Endocrinol Diabetes Nutr (Engl Ed)	2020	15/01/2020			10.1016/j.endinu.2019.04.009
31927537	Upregulation of flavin-containing monooxygenase 3 mimics calorie restriction to retard liver aging by inducing autophagy	Guo D, Shen Y, Li W, Li Q, Miao Y, Zhong Y.	Aging (Albany NY). 2020 Jan 11;12(1):931-944. doi: 10.18632/aging.102666. Epub 2020 Jan 11.	Guo D	Aging (Albany NY)	2020	14/01/2020	PMC6977670		10.18632/aging.102666
31928490	N-Oleoyl-Phosphatidyl-Ethanolamine and Epigallo Catechin-3-Gallate Mitigate Oxidative Stress in Overweight and Class I Obese People on a Low-Calorie Diet	Cazzola R, Rondanelli M.	J Med Food. 2020 Mar;23(3):319-325. doi: 10.1089/jmf.2019.0145. Epub 2020 Jan 13.	Cazzola R	J Med Food	2020	14/01/2020			10.1089/jmf.2019.0145
31905920	A Calorie-Restricted DASH Diet Reduces Body Fat and Maintains Muscle Strength in Obese Older Adults	Perry CA, Van Guilder GP, Kauffman A, Hossain M.	Nutrients. 2019 Dec 30;12(1):102. doi: 10.3390/nu12010102.	Perry CA	Nutrients	2019	2020-08-01	PMC7019370		10.3390/nu12010102
31902578	A letter to the editor	Wolf R, Steele KE.	Surg Obes Relat Dis. 2020 Mar;16(3):451. doi: 10.1016/j.soard.2019.11.019. Epub 2019 Dec 3.	Wolf R	Surg Obes Relat Dis	2020	2020-07-01			10.1016/j.soard.2019.11.019
31899888	The Effect of Combined Aerobic Exercise and Calorie Restriction on Mood, Cognition, and Motor Behavior in Overweight and Obese Women	Žlibinaitė L, Solianik R, Vizbaraitė D, Mickevičienė D, Skurvydas A.	J Phys Act Health. 2020 Feb 1;17(2):204-210. doi: 10.1123/jpah.2019-0373.	Žlibinaitė L	J Phys Act Health	2020	2020-04-01			10.1123/jpah.2019-0373
31887371	Mitochondrial haplogroups and lifespan in a population isolate	Bonner J, Fisher R, Wilch E, Schutte D, Schutte B.	Mitochondrion. 2020 Mar;51:62-67. doi: 10.1016/j.mito.2019.12.004. Epub 2019 Dec 27.	Bonner J	Mitochondrion	2020	31/12/2019			10.1016/j.mito.2019.12.004
31881991	Pharmacist-led therapeutic carbohydrate restriction as a treatment strategy for type 2 diabetes: the Pharm-TCR randomized controlled trial protocol	Durrer C, McKelvey S, Singer J, Batterham AM, Johnson JD, Wortman J, Little JP.	Trials. 2019 Dec 27;20(1):781. doi: 10.1186/s13063-019-3873-7.	Durrer C	Trials	2019	29/12/2019	PMC6935079		10.1186/s13063-019-3873-7
31878234	The Lifespan Extension Ability of Nicotinic Acid Depends on Whether the Intracellular NAD(+) Level Is Lower than the Sirtuin-Saturating Concentrations	Yang NC, Cho YH, Lee I.	Int J Mol Sci. 2019 Dec 24;21(1):142. doi: 10.3390/ijms21010142.	Yang NC	Int J Mol Sci	2019	28/12/2019	PMC6982340		10.3390/ijms21010142
31865423	n-3 PUFA and caloric restriction diet alters lipidomic profiles in obese men with metabolic syndrome: a preliminary open study	Shabrina A, Tung TH, Nguyen NTK, Lee HC, Wu HT, Wang W, Huang SY.	Eur J Nutr. 2020 Oct;59(7):3103-3112. doi: 10.1007/s00394-019-02149-4. Epub 2019 Dec 21.	Shabrina A	Eur J Nutr	2020	23/12/2019			10.1007/s00394-019-02149-4
31846684	Metabolism: A Burning Opioid Issue in Obesity Therapeutics	da Silva Catarino J, Horvath TL.	Curr Biol. 2019 Dec 16;29(24):R1323-R1325. doi: 10.1016/j.cub.2019.10.055.	da Silva Catarino J	Curr Biol	2019	18/12/2019			10.1016/j.cub.2019.10.055
31841744	An energy-restricted high-protein diet supplemented with β-cryptoxanthin alleviated oxidative stress and inflammation in nonalcoholic fatty liver disease: a randomized controlled trial	Haidari F, Hojhabrimanesh A, Helli B, Seyedian SS, Ahmadi-Angali K.	Nutr Res. 2020 Jan;73:15-26. doi: 10.1016/j.nutres.2019.08.009. Epub 2019 Sep 2.	Haidari F	Nutr Res	2020	17/12/2019			10.1016/j.nutres.2019.08.009
31839571	Effects of a high protein/low carbohydrate low-calorie diet versus a standard low-calorie diet on anthropometric parameters and cardiovascular risk factors, role of polymorphism rs3123554 in the cannabinoid receptor gene type 2 (CB2R)	Primo D, Izaola O, de Luis D.	Endocrinol Diabetes Nutr (Engl Ed). 2020 Aug-Sep;67(7):446-453. doi: 10.1016/j.endinu.2019.09.010. Epub 2019 Dec 12.	Primo D	Endocrinol Diabetes Nutr (Engl Ed)	2020	17/12/2019			10.1016/j.endinu.2019.09.010
31838462	Carbohydrate restriction in the morning increases weight loss effect of a hypocaloric Mediterranean type diet: a randomized, parallel group dietary intervention in overweight and obese subjects	Dellis D, Tsilingiris D, Eleftheriadou I, Tentolouris A, Sfikakis PP Jr, Dellis G, Karanasiou M, Meimari A, Dimosthenopoulos C, Lazarou S, Tentolouris N.	Nutrition. 2020 Mar;71:110578. doi: 10.1016/j.nut.2019.110578. Epub 2019 Sep 5.	Dellis D	Nutrition	2020	16/12/2019			10.1016/j.nut.2019.110578
31832204	Impact of drug distribution into adipose on tissue function: The cholesteryl ester transfer protein (CETP) inhibitor anacetrapib as a test case	Johns DG, Wang SP, Rosa R, Hubert J, Xu S, Chen Y, Bateman T, Blaustein RO.	Pharmacol Res Perspect. 2019 Nov 15;7(6):e00543. doi: 10.1002/prp2.543. eCollection 2019 Dec.	Johns DG	Pharmacol Res Perspect	2019	14/12/2019	PMC6857080		10.1002/prp2.543
31825067	Matched Weight Loss Through Intermittent or Continuous Energy Restriction Does Not Lead To Compensatory Increases in Appetite and Eating Behavior in a Randomized Controlled Trial in Women with Overweight and Obesity	Beaulieu K, Casanova N, Oustric P, Turicchi J, Gibbons C, Hopkins M, Varady K, Blundell J, Finlayson G.	J Nutr. 2020 Mar 1;150(3):623-633. doi: 10.1093/jn/nxz296.	Beaulieu K	J Nutr	2020	2019-12-12			10.1093/jn/nxz296
31818675	Fast track to health - Intermittent energy restriction in adolescents with obesity. A randomised controlled trial study protocol	Lister NB, Jebeile H, Truby H, Garnett SP, Varady KA, Cowell CT, Collins CE, Paxton SJ, Gow ML, Brown J, Alexander S, Chisholm K, Grunseit AM, Aldwell K, Day K, Inkster MK, Lang S, Baur LA.	Obes Res Clin Pract. 2020 Jan-Feb;14(1):80-90. doi: 10.1016/j.orcp.2019.11.005. Epub 2019 Dec 7.	Lister NB	Obes Res Clin Pract	2020	2019-11-12			10.1016/j.orcp.2019.11.005
31817052	Effects of Weight Loss on FGF-21 in Human Subjects: An Exploratory Study	Headland ML, Clifton PM, Keogh JB.	Int J Environ Res Public Health. 2019 Dec 3;16(23):4877. doi: 10.3390/ijerph16234877.	Headland ML	Int J Environ Res Public Health	2019	2019-11-12	PMC6926763		10.3390/ijerph16234877
31816338	Healthiness or calories? Side biases in food perception and preference	Manippa V, Giuliani F, Brancucci A.	Appetite. 2020 Apr 1;147:104552. doi: 10.1016/j.appet.2019.104552. Epub 2019 Dec 6.	Manippa V	Appetite	2020	2019-10-12			10.1016/j.appet.2019.104552
31813384	Effects of high-oleic peanuts within a hypoenergetic diet on inflammatory and oxidative status of overweight men: a randomised controlled trial	Caldas APS, Alves RDM, Hermsdorff HHM, de Oliveira LL, Bressan J.	Br J Nutr. 2020 Mar 28;123(6):673-680. doi: 10.1017/S0007114519003246. Epub 2019 Dec 9.	Caldas APS	Br J Nutr	2020	2019-10-12			10.1017/S0007114519003246
31813388	Increased consumption of calcium from fat-free milk, energy-restricted diet and educational activities improves metabolic control in overweight type 2 diabetic patients	Costa JA, Gomes JMG, Ribeiro PVM, Alfenas RCG.	Br J Nutr. 2020 Mar 14;123(5):553-563. doi: 10.1017/S0007114519003192. Epub 2019 Dec 9.	Costa JA	Br J Nutr	2020	2019-10-12			10.1017/S0007114519003192
31802116	Predicting Weight Loss Using Psychological and Behavioral Factors: The POUNDS LOST Trial	Liu X, Hanseman DJ, Champagne CM, Bray GA, Qi L, Williamson DA, Anton SD, Sacks FM, Tong J.	J Clin Endocrinol Metab. 2020 Apr 1;105(4):1274-83. doi: 10.1210/clinem/dgz236.	Liu X	J Clin Endocrinol Metab	2020	2019-06-12	PMC7067534		10.1210/clinem/dgz236
31779987	Modified alternate-day fasting vs. calorie restriction in the treatment of patients with metabolic syndrome: A randomized clinical trial	Parvaresh A, Razavi R, Abbasi B, Yaghoobloo K, Hassanzadeh A, Mohammadifard N, Safavi SM, Hadi A, Clark CCT.	Complement Ther Med. 2019 Dec;47:102187. doi: 10.1016/j.ctim.2019.08.021. Epub 2019 Aug 28.	Parvaresh A	Complement Ther Med	2019	30/11/2019			10.1016/j.ctim.2019.08.021
31759830	[Effect of intensive nutritional intervention in patients refractory to weight loss]	Álvarez-Álvarez L, Rubín-García M, Vitelli Storelli F, Fernández-Vázquez JP, Basora J, Fitó M.	Semergen. 2020 Apr;46(3):167-174. doi: 10.1016/j.semerg.2019.09.006. Epub 2019 Nov 20.	Álvarez-Álvarez L	Semergen	2020	25/11/2019			10.1016/j.semerg.2019.09.006
31758475	Adherence to Mediterranean Diet or Physical Activity After Bariatric Surgery and Its Effects on Weight Loss, Quality of Life, and Food Tolerance	Gils Contreras A, Bonada Sanjaume A, Becerra-Tomás N, Salas-Salvadó J.	Obes Surg. 2020 Feb;30(2):687-696. doi: 10.1007/s11695-019-04242-3.	Gils Contreras A	Obes Surg	2020	24/11/2019			10.1007/s11695-019-04242-3
31752260	Exercise Mitigates the Loss of Muscle Mass by Attenuating the Activation of Autophagy during Severe Energy Deficit	Martin-Rincon M, Pérez-López A, Morales-Alamo D, Perez-Suarez I, de Pablos-Velasco P, Perez-Valera M, Perez-Regalado S, Martinez-Canton M, Gelabert-Rebato M, Juan-Habib JW, Holmberg HC, Calbet JAL.	Nutrients. 2019 Nov 19;11(11):2824. doi: 10.3390/nu11112824.	Martin-Rincon M	Nutrients	2019	23/11/2019	PMC6893734		10.3390/nu11112824
31753852	Suppression of enteroendocrine cell glucagon-like peptide (GLP)-1 release by fat-induced small intestinal ketogenesis: a mechanism targeted by Roux-en-Y gastric bypass surgery but not by preoperative very-low-calorie diet	Wallenius V, Elias E, Elebring E, Haisma B, Casselbrant A, Larraufie P, Spak E, Reimann F, le Roux CW, Docherty NG, Gribble FM, Fändriks L.	Gut. 2020 Aug;69(8):1423-1431. doi: 10.1136/gutjnl-2019-319372. Epub 2019 Nov 21.	Wallenius V	Gut	2020	23/11/2019	PMC7347417	EMS86325	10.1136/gutjnl-2019-319372
31751150	Weight loss efficacy of alternate day fasting versus daily calorie restriction in subjects with subclinical hypothyroidism: a secondary analysis	Akasheh RT, Kroeger CM, Trepanowski JF, Gabel K, Hoddy KK, Kalam F, Cienfuegos S, Varady KA.	Appl Physiol Nutr Metab. 2020 Mar;45(3):340-343. doi: 10.1139/apnm-2019-0554. Epub 2019 Nov 21.	Akasheh RT	Appl Physiol Nutr Metab	2020	22/11/2019			10.1139/apnm-2019-0554
31751449	Modeling of an integrative prototype based on genetic, phenotypic, and environmental information for personalized prescription of energy-restricted diets in overweight/obese subjects	Ramos-Lopez O, Cuervo M, Goni L, Milagro FI, Riezu-Boj JI, Martinez JA.	Am J Clin Nutr. 2020 Feb 1;111(2):459-470. doi: 10.1093/ajcn/nqz286.	Ramos-Lopez O	Am J Clin Nutr	2020	22/11/2019			10.1093/ajcn/nqz286
31744401	Neuromuscular performance after rapid weight loss in Olympic-style boxers	Zubac D, Šimunič B, Buoite Stella A, Morrison SA.	Eur J Sport Sci. 2020 Sep;20(8):1051-1060. doi: 10.1080/17461391.2019.1695954. Epub 2019 Dec 2.	Zubac D	Eur J Sport Sci	2020	21/11/2019			10.1080/17461391.2019.1695954
31747677	Adiponectin Gene Variant rs266729 Interacts with Different Macronutrient Distribution of Two Different Hypocaloric Diets	de Luis DA, Primo D, Izaola O, Aller R.	Lifestyle Genom. 2020;13(1):20-27. doi: 10.1159/000503863. Epub 2019 Nov 20.	de Luis DA	Lifestyle Genom	2020	21/11/2019			10.1159/000503863
31717264	Frequency of Trying to Lose Weight and Its Association with Children's Weight Perception and Dietary Intake (NHANES 2011-2012)	Brown T, Overcash F, Reicks M.	Nutrients. 2019 Nov 8;11(11):2703. doi: 10.3390/nu11112703.	Brown T	Nutrients	2019	14/11/2019	PMC6893406		10.3390/nu11112703
31713941	The effects of grape seed extract (Vitis vinifera) supplement on inflammatory markers, neuropeptide Y, anthropometric measures, and appetite in obese or overweight individuals: A randomized clinical trial	Parandoosh M, Yousefi R, Khorsandi H, Nikpayam O, Saidpour A, Babaei H.	Phytother Res. 2020 Feb;34(2):379-387. doi: 10.1002/ptr.6529. Epub 2019 Nov 11.	Parandoosh M	Phytother Res	2020	13/11/2019			10.1002/ptr.6529
31708234	Combining metabolic profiling of plasma and faeces as a fingerprint of insulin resistance in obesity	Palomino-Schätzlein M, Mayneris-Perxachs J, Caballano-Infantes E, Rodríguez MA, Palomo-Buitrago ME, Xiao X, Mares R, Ricart W, Simó R, Herance JR, Fernández-Real JM.	Clin Nutr. 2020 Jul;39(7):2292-2300. doi: 10.1016/j.clnu.2019.10.022. Epub 2019 Oct 25.	Palomino-Schätzlein M	Clin Nutr	2020	2019-12-11			10.1016/j.clnu.2019.10.022
31705259	Efficacy and safety of very low calorie ketogenic diet (VLCKD) in patients with overweight and obesity: A systematic review and meta-analysis	Castellana M, Conte E, Cignarelli A, Perrini S, Giustina A, Giovanella L, Giorgino F, Trimboli P.	Rev Endocr Metab Disord. 2020 Mar;21(1):5-16. doi: 10.1007/s11154-019-09514-y.	Castellana M	Rev Endocr Metab Disord	2020	2019-10-11			10.1007/s11154-019-09514-y
31690168	A discovery platform for the identification of caloric restriction mimetics with broad health-improving effects	Kepp O, Chen G, Carmona-Gutierrez D, Madeo F, Kroemer G.	Autophagy. 2020 Jan;16(1):188-189. doi: 10.1080/15548627.2019.1688984. Epub 2019 Nov 7.	Kepp O	Autophagy	2020	2019-07-11	PMC6984457		10.1080/15548627.2019.1688984
31685793	Energy restriction in obese women suggest linear reduction of hepatic fat content and time-dependent metabolic improvements	Johansson HE, Edholm D, Kullberg J, Rosqvist F, Rudling M, Straniero S, Karlsson FA, Ahlström H, Sundbom M, Risérus U.	Nutr Diabetes. 2019 Nov 4;9(1):34. doi: 10.1038/s41387-019-0100-2.	Johansson HE	Nutr Diabetes	2019	2019-06-11	PMC6828725		10.1038/s41387-019-0100-2
31678947	Protocol for a randomised controlled trial of the combined effects of the GLP-1 receptor agonist liraglutide and exercise on maintenance of weight loss and health after a very low-calorie diet	Jensen SBK, Lundgren JR, Janus C, Juhl CR, Olsen LM, Rosenkilde M, Holst JJ, Stallknecht BM, Madsbad S, Torekov SS.	BMJ Open. 2019 Nov 2;9(11):e031431. doi: 10.1136/bmjopen-2019-031431.	Jensen SBK	BMJ Open	2019	2019-04-11	PMC6830609		10.1136/bmjopen-2019-031431
31674694	Sarcolipin expression in human skeletal muscle: Influence of energy balance and exercise	Morales-Alamo D, Martinez-Canton M, Gelabert-Rebato M, Martin-Rincon M, de Pablos-Velasco P, Holmberg HC, Calbet JAL.	Scand J Med Sci Sports. 2020 Mar;30(3):408-420. doi: 10.1111/sms.13594. Epub 2019 Dec 5.	Morales-Alamo D	Scand J Med Sci Sports	2020	2019-02-11			10.1111/sms.13594
31667896	Food restriction, nutrition status, and growth in toddlers with atopic dermatitis	Low DW, Jamil A, Md Nor N, Kader Ibrahim SB, Poh BK.	Pediatr Dermatol. 2020 Jan;37(1):69-77. doi: 10.1111/pde.14004. Epub 2019 Oct 30.	Low DW	Pediatr Dermatol	2020	2019-01-11			10.1111/pde.14004
31668385	Interaction of circulating GLP-1 and the response of the dorsolateral prefrontal cortex to food-cues predicts body weight development	Maurer L, Mai K, Krude H, Haynes JD, Weygandt M, Spranger J.	Mol Metab. 2019 Nov;29:136-144. doi: 10.1016/j.molmet.2019.08.014. Epub 2019 Aug 21.	Maurer L	Mol Metab	2019	2019-01-11	PMC6812034		10.1016/j.molmet.2019.08.014
31664441	Effect of Weight Loss via Severe vs Moderate Energy Restriction on Lean Mass and Body Composition Among Postmenopausal Women With Obesity: The TEMPO Diet Randomized Clinical Trial	Seimon RV, Wild-Taylor AL, Keating SE, McClintock S, Harper C, Gibson AA, Johnson NA, Fernando HA, Markovic TP, Center JR, Franklin J, Liu PY, Grieve SM, Lagopoulos J, Caterson ID, Byrne NM, Sainsbury A.	JAMA Netw Open. 2019 Oct 2;2(10):e1913733. doi: 10.1001/jamanetworkopen.2019.13733.	Seimon RV	JAMA Netw Open	2019	31/10/2019	PMC6824325		10.1001/jamanetworkopen.2019.13733
31653569	Comment on: Impact of a preoperative low-calorie diet on liver histology in patients with fatty liver disease undergoing bariatric surgery	Rogers AM.	Surg Obes Relat Dis. 2019 Dec;15(12):e33-e34. doi: 10.1016/j.soard.2019.09.066. Epub 2019 Sep 19.	Rogers AM	Surg Obes Relat Dis	2019	27/10/2019			10.1016/j.soard.2019.09.066
31652512	The Metabolic and Hepatic Impact of Two Personalized Dietary Strategies in Subjects with Obesity and Nonalcoholic Fatty Liver Disease: The Fatty Liver in Obesity (FLiO) Randomized Controlled Trial	Marin-Alejandre BA, Abete I, Cantero I, Monreal JI, Elorz M, Herrero JI, Benito-Boillos A, Quiroga J, Martinez-Echeverria A, Uriz-Otano JI, Huarte-Muniesa MP, Tur JA, Martinez JA, Zulet MA.	Nutrients. 2019 Oct 22;11(10):2543. doi: 10.3390/nu11102543.	Marin-Alejandre BA	Nutrients	2019	27/10/2019	PMC6836315		10.3390/nu11102543
31618887	Cognitive Restraint and History of Dieting Are Negatively Associated with Organic Food Consumption in a Large Population-Based Sample of Organic Food Consumers	Giudici KV, Baudry J, Méjean C, Lairon D, Bénard M, Hercberg S, Bellisle F, Kesse-Guyot E, Péneau S.	Nutrients. 2019 Oct 15;11(10):2468. doi: 10.3390/nu11102468.	Giudici KV	Nutrients	2019	18/10/2019	PMC6836016		10.3390/nu11102468
31613346	Effect of a Nutritional and Behavioral Intervention on Energy-Reduced Mediterranean Diet Adherence Among Patients With Metabolic Syndrome: Interim Analysis of the PREDIMED-Plus Randomized Clinical Trial	Sayón-Orea C, Razquin C, Bulló M, Corella D, Fitó M, Romaguera D, Vioque J, Alonso-Gómez ÁM, Wärnberg J, Martínez JA, Serra-Majem L, Estruch R, Tinahones FJ, Lapetra J, Pintó X, Tur JA, López-Miranda J, Bueno-Cavanillas A, Delgado-Rodríguez M, Matía-Martín P, Daimiel L, Sánchez VM, Vidal J, Vázquez C, Ros E, Ruiz-Canela M, Sorlí JV, Castañer O, Fiol M, Navarrete-Muñoz EM, Arós F, Gómez-Gracia E, …	JAMA. 2019 Oct 15;322(15):1486-1499. doi: 10.1001/jama.2019.14630.	Sayón-Orea C	JAMA	2019	16/10/2019	PMC6802271		10.1001/jama.2019.14630
31610068	Impact of caloric restriction on peripheral nerve injury-induced neuropathic pain during ageing in mice	De Angelis F, Vacca V, Pavone F, Marinelli S.	Eur J Pain. 2020 Feb;24(2):374-382. doi: 10.1002/ejp.1493. Epub 2019 Oct 27.	De Angelis F	Eur J Pain	2020	15/10/2019			10.1002/ejp.1493
31605198	Efficacy of an intermittent energy restriction diet in a primary care setting	Antoni R, Johnston KL, Steele C, Carter D, Robertson MD, Capehorn MS.	Eur J Nutr. 2020 Sep;59(6):2805-2812. doi: 10.1007/s00394-019-02098-y. Epub 2019 Oct 11.	Antoni R	Eur J Nutr	2020	13/10/2019	PMC7413919		10.1007/s00394-019-02098-y
31605197	The effect of inulin and resistant maltodextrin on weight loss during energy restriction: a randomised, placebo-controlled, double-blinded intervention	Hess AL, Benítez-Páez A, Blædel T, Larsen LH, Iglesias JR, Madera C, Sanz Y, Larsen TM; MyNewGut Consortium.	Eur J Nutr. 2020 Sep;59(6):2507-2524. doi: 10.1007/s00394-019-02099-x. Epub 2019 Oct 11.	Hess AL	Eur J Nutr	2020	13/10/2019			10.1007/s00394-019-02099-x
31601789	Pseudodiabetes-not a contraindication for metabolic interventions	Bravo-San Pedro JM, Sica V, Kroemer G.	Cell Death Dis. 2019 Oct 10;10(10):765. doi: 10.1038/s41419-019-2007-1.	Bravo-San Pedro JM	Cell Death Dis	2019	2019-12-10	PMC6787197		10.1038/s41419-019-2007-1
31590286	Effect of a Very-Low-Calorie Ketogenic Diet on Circulating Myokine Levels Compared with the Effect of Bariatric Surgery or a Low-Calorie Diet in Patients with Obesity	Sajoux I, Lorenzo PM, Gomez-Arbelaez D, Zulet MA, Abete I, Castro AI, Baltar J, Portillo MP, Tinahones FJ, Martinez JA, Crujeiras AB, Casanueva FF.	Nutrients. 2019 Oct 4;11(10):2368. doi: 10.3390/nu11102368.	Sajoux I	Nutrients	2019	2019-09-10	PMC6835835		10.3390/nu11102368
31590285	Changes in Weight and Substrate Oxidation in Overweight Adults Following Isomaltulose Intake During a 12-Week Weight Loss Intervention: A Randomized, Double-Blind, Controlled Trial	Lightowler H, Schweitzer L, Theis S, Henry CJ.	Nutrients. 2019 Oct 4;11(10):2367. doi: 10.3390/nu11102367.	Lightowler H	Nutrients	2019	2019-09-10	PMC6836138		10.3390/nu11102367
31587177	Examining the role of body esteem and sensation seeking in drunkorexia behaviors	Hill EM, Lego JE.	Eat Weight Disord. 2020 Dec;25(6):1507-1513. doi: 10.1007/s40519-019-00784-8. Epub 2019 Oct 5.	Hill EM	Eat Weight Disord	2020	2019-07-10			10.1007/s40519-019-00784-8
31577953	Calorie-Restriction-Induced Insulin Sensitivity Is Mediated by Adipose mTORC2 and Not Required for Lifespan Extension	Yu D, Tomasiewicz JL, Yang SE, Miller BR, Wakai MH, Sherman DS, Cummings NE, Baar EL, Brinkman JA, Syed FA, Lamming DW.	Cell Rep. 2019 Oct 1;29(1):236-248.e3. doi: 10.1016/j.celrep.2019.08.084.	Yu D	Cell Rep	2019	2019-03-10	PMC6820997	NIHMS1054011	10.1016/j.celrep.2019.08.084
31575375	Effects of 1 year of exercise training versus combined exercise training and weight loss on body composition, low-grade inflammation and lipids in overweight patients with coronary artery disease: a randomized trial	Pedersen LR, Olsen RH, Anholm C, Astrup A, Eugen-Olsen J, Fenger M, Simonsen L, Walzem RL, Haugaard SB, Prescott E.	Cardiovasc Diabetol. 2019 Oct 1;18(1):127. doi: 10.1186/s12933-019-0934-x.	Pedersen LR	Cardiovasc Diabetol	2019	2019-03-10	PMC6774219		10.1186/s12933-019-0934-x
31568769	Endoscopic sleeve gastroplasty versus high-intensity diet and lifestyle therapy: a case-matched study	Cheskin LJ, Hill C, Adam A, Fayad L, Dunlap M, Badurdeen D, Koller K, Bunyard L, Frutchey R, Al-Grain H, Kahan S, Hedjoudje A, Khashab MA, Kalloo AN, Kumbhari V.	Gastrointest Endosc. 2020 Feb;91(2):342-349.e1. doi: 10.1016/j.gie.2019.09.029. Epub 2019 Sep 27.	Cheskin LJ	Gastrointest Endosc	2020	2019-01-10			10.1016/j.gie.2019.09.029
31558407	Impact of a preoperative low-calorie diet on liver histology in patients with fatty liver disease undergoing bariatric surgery	Wolf RM, Oshima K, Canner JK, Steele KE.	Surg Obes Relat Dis. 2019 Oct;15(10):1766-1772. doi: 10.1016/j.soard.2019.08.013. Epub 2019 Aug 22.	Wolf RM	Surg Obes Relat Dis	2019	28/09/2019			10.1016/j.soard.2019.08.013
31552710	Endothelial function following interval exercise plus low-calorie diet treatment in obese females	Gilbertson NM, Miller SL, Eichner NZM, Malin SK.	Physiol Rep. 2019 Sep;7(18):e14239. doi: 10.14814/phy2.14239.	Gilbertson NM	Physiol Rep	2019	26/09/2019	PMC6759506		10.14814/phy2.14239
31535875	Beyond the thin ideal: Development and validation of the Fit Ideal Internalization Test (FIIT) for women	Uhlmann LR, Donovan CL, Zimmer-Gembeck MJ.	Psychol Assess. 2020 Feb;32(2):140-153. doi: 10.1037/pas0000773. Epub 2019 Sep 19.	Uhlmann LR	Psychol Assess	2020	20/09/2019			10.1037/pas0000773
31533256	A Randomized Controlled Trial Evaluating the Relative Effectiveness of the Multiple Traffic Light and Nutri-Score Front of Package Nutrition Labels	Finkelstein EA, Ang FJL, Doble B, Wong WHM, van Dam RM.	Nutrients. 2019 Sep 17;11(9):2236. doi: 10.3390/nu11092236.	Finkelstein EA	Nutrients	2019	20/09/2019	PMC6770629		10.3390/nu11092236
31529393	Body Composition Changes Following a Very-Low-Calorie Pre-Operative Diet in Patients Undergoing Bariatric Surgery	Sivakumar J, Chong L, Ward S, Sutherland TR, Read M, Hii MW.	Obes Surg. 2020 Jan;30(1):119-126. doi: 10.1007/s11695-019-04174-y.	Sivakumar J	Obes Surg	2020	19/09/2019			10.1007/s11695-019-04174-y
31485770	Pelvic fat volume reduction with preoperative very low energy diet (VLED): implications for rectal cancer surgery in the obese	Bell S, Malouf P, Johnson N, Wale R, Peng Q, Nottle P, Warrier S.	Tech Coloproctol. 2019 Sep;23(9):887-892. doi: 10.1007/s10151-019-02074-y. Epub 2019 Sep 4.	Bell S	Tech Coloproctol	2019	2019-06-09			10.1007/s10151-019-02074-y
31484053	Alternate-Day Fasting Gets a Safe Bill of Health	Heilbronn LK, Panda S.	Cell Metab. 2019 Sep 3;30(3):411-413. doi: 10.1016/j.cmet.2019.08.006.	Heilbronn LK	Cell Metab	2019	2019-05-09			10.1016/j.cmet.2019.08.006
31477085	Does a restricted energy low glycemic index diet have a different effect on overweight women with or without polycystic ovary syndrome?	Shishehgar F, Mirmiran P, Rahmati M, Tohidi M, Ramezani Tehrani F.	BMC Endocr Disord. 2019 Sep 2;19(1):93. doi: 10.1186/s12902-019-0420-1.	Shishehgar F	BMC Endocr Disord	2019	2019-04-09	PMC6720418		10.1186/s12902-019-0420-1
31477138	Assessment of the FTO gene polymorphisms (rs1421085, rs17817449 and rs9939609) in exercise-trained men and women: the effects of a 4-week hypocaloric diet	Antonio J, Knafo S, Kenyon M, Ali A, Carson C, Ellerbroek A, Weaver C, Roberts J, Peacock CA, Tartar JL.	J Int Soc Sports Nutr. 2019 Sep 2;16(1):36. doi: 10.1186/s12970-019-0307-6.	Antonio J	J Int Soc Sports Nutr	2019	2019-04-09	PMC6719365		10.1186/s12970-019-0307-6
31471173	Alternate Day Fasting Improves Physiological and Molecular Markers of Aging in Healthy, Non-obese Humans	Stekovic S, Hofer SJ, Tripolt N, Aon MA, Royer P, Pein L, Stadler JT, Pendl T, Prietl B, Url J, Schroeder S, Tadic J, Eisenberg T, Magnes C, Stumpe M, Zuegner E, Bordag N, Riedl R, Schmidt A, Kolesnik E, Verheyen N, Springer A, Madl T, Sinner F, de Cabo R, Kroemer G, Obermayer-Pietsch B, Dengjel J, Sourij H, Pieber TR, Madeo F.	Cell Metab. 2019 Sep 3;30(3):462-476.e6. doi: 10.1016/j.cmet.2019.07.016. Epub 2019 Aug 27.	Stekovic S	Cell Metab	2019	2019-01-09			10.1016/j.cmet.2019.07.016
31451009	Improvement of Lipoprotein Profile and Metabolic Endotoxemia by a Lifestyle Intervention That Modifies the Gut Microbiota in Subjects With Metabolic Syndrome	Guevara-Cruz M, Flores-López AG, Aguilar-López M, Sánchez-Tapia M, Medina-Vera I, Díaz D, Tovar AR, Torres N.	J Am Heart Assoc. 2019 Sep 3;8(17):e012401. doi: 10.1161/JAHA.119.012401. Epub 2019 Aug 27.	Guevara-Cruz M	J Am Heart Assoc	2019	28/08/2019	PMC6755842		10.1161/JAHA.119.012401
31442303	Randomized trial of weight loss in primary breast cancer: Impact on body composition, circulating biomarkers and tumor characteristics	Demark-Wahnefried W, Rogers LQ, Gibson JT, Harada S, Frugé AD, Oster RA, Grizzle WE, Norian LA, Yang ES, Della Manna D, Jones LW, Azrad M, Krontiras H.	Int J Cancer. 2020 May 15;146(10):2784-2796. doi: 10.1002/ijc.32637. Epub 2019 Sep 5.	Demark-Wahnefried W	Int J Cancer	2020	24/08/2019	PMC7155016		10.1002/ijc.32637
31438863	The effect of circuit resistance training, empagliflozin or "vegeterranean diet" on physical and metabolic function in older subjects with type 2 diabetes: a study protocol for a randomized control trial (CEV-65 trial)	Buch A, Eldor R, Kis O, Keinan-Boker L, Dunsky A, Rubin A, Lopez A, Sofer Y, Osher E, Marcus Y, Stern N.	BMC Geriatr. 2019 Aug 22;19(1):228. doi: 10.1186/s12877-019-1219-7.	Buch A	BMC Geriatr	2019	24/08/2019	PMC6704502		10.1186/s12877-019-1219-7
31442403	Dietary Intake Regulates the Circulating Inflammatory Monocyte Pool	Jordan S, Tung N, Casanova-Acebes M, Chang C, Cantoni C, Zhang D, Wirtz TH, Naik S, Rose SA, Brocker CN, Gainullina A, Hornburg D, Horng S, Maier BB, Cravedi P, LeRoith D, Gonzalez FJ, Meissner F, Ochando J, Rahman A, Chipuk JE, Artyomov MN, Frenette PS, Piccio L, Berres ML, Gallagher EJ, Merad M.	Cell. 2019 Aug 22;178(5):1102-1114.e17. doi: 10.1016/j.cell.2019.07.050.	Jordan S	Cell	2019	24/08/2019	PMC7357241	NIHMS1595806	10.1016/j.cell.2019.07.050
31431306	Effect of calorie restriction or protein intake on circulating levels of insulin like growth factor I in humans: A systematic review and meta-analysis	Kazemi A, Speakman JR, Soltani S, Djafarian K.	Clin Nutr. 2020 Jun;39(6):1705-1716. doi: 10.1016/j.clnu.2019.07.030. Epub 2019 Aug 10.	Kazemi A	Clin Nutr	2020	22/08/2019			10.1016/j.clnu.2019.07.030
31421060	Pythagorean self-awareness intervention: A novel cognitive stress management technique for body weight control	Simos DS, Kokkinos A, Tentolouris N, Dimosthenopoulos C, Mantzou E, Artemiadis A, Bacopoulou F, Nicolaides NC, Kosta O, Chrousos GP, Darviri C.	Eur J Clin Invest. 2019 Oct;49(10):e13164. doi: 10.1111/eci.13164. Epub 2019 Sep 16.	Simos DS	Eur J Clin Invest	2019	18/08/2019			10.1111/eci.13164
31415241	Effect of dietary fat and sucrose consumption on cardiac fibrosis in mice and rhesus monkeys	Natarajan N, Vujic A, Das J, Wang AC, Phu KK, Kiehm SH, Ricci-Blair EM, Zhu AY, Vaughan KL, Colman RJ, Mattison JA, Lee RT.	JCI Insight. 2019 Sep 19;4(18):e128685. doi: 10.1172/jci.insight.128685.	Natarajan N	JCI Insight	2019	16/08/2019	PMC6795382		10.1172/jci.insight.128685
31409509	Intermittent energy restriction is comparable to continuous energy restriction for cardiometabolic health in adults with central obesity: A randomized controlled trial; the Met-IER study	Pinto AM, Bordoli C, Buckner LP, Kim C, Kaplan PC, Del Arenal IM, Jeffcock EJ, Hall WL.	Clin Nutr. 2020 Jun;39(6):1753-1763. doi: 10.1016/j.clnu.2019.07.014. Epub 2019 Jul 30.	Pinto AM	Clin Nutr	2020	15/08/2019			10.1016/j.clnu.2019.07.014
31398376	Change in self-efficacy, eating behaviors and food cravings during two years of calorie restriction in humans without obesity	Dorling JL, Bhapkar M, Das SK, Racette SB, Apolzan JW, Fearnbach SN, Redman LM, Myers CA, Stewart TM, Martin CK; CALERIE Study Group.	Appetite. 2019 Dec 1;143:104397. doi: 10.1016/j.appet.2019.104397. Epub 2019 Aug 6.	Dorling JL	Appetite	2019	2019-10-08	PMC6766406	NIHMS1537523	10.1016/j.appet.2019.104397
31395858	Impact of energy turnover on the regulation of glucose homeostasis in healthy subjects	Büsing F, Hägele FA, Nas A, Hasler M, Müller MJ, Bosy-Westphal A.	Nutr Diabetes. 2019 Aug 8;9(1):22. doi: 10.1038/s41387-019-0089-6.	Büsing F	Nutr Diabetes	2019	2019-10-08	PMC6687696		10.1038/s41387-019-0089-6
31386626	The risk of jiggly fat in aging	Corrales P, Martín-Taboada M, Medina-Gomez G.	Aging (Albany NY). 2019 Aug 6;11(15):5298-5299. doi: 10.18632/aging.102147. Epub 2019 Aug 6.	Corrales P	Aging (Albany NY)	2019	2019-07-08	PMC6710039		10.18632/aging.102147
31375753	A Randomised Controlled Trial on the Effectiveness and Adherence of Modified Alternate-day Calorie Restriction in Improving Activity of Non-Alcoholic Fatty Liver Disease	Johari MI, Yusoff K, Haron J, Nadarajan C, Ibrahim KN, Wong MS, Hafidz MIA, Chua BE, Hamid N, Arifin WN, Ma ZF, Lee YY.	Sci Rep. 2019 Aug 2;9(1):11232. doi: 10.1038/s41598-019-47763-8.	Johari MI	Sci Rep	2019	2019-04-08	PMC6677794		10.1038/s41598-019-47763-8
31367159	Lingguizhugan decoction attenuates diet-induced obesity and hepatosteatosis via gut microbiota	Liu MT, Huang YJ, Zhang TY, Tan LB, Lu XF, Qin J.	World J Gastroenterol. 2019 Jul 21;25(27):3590-3606. doi: 10.3748/wjg.v25.i27.3590.	Liu MT	World J Gastroenterol	2019	2019-02-08	PMC6658390		10.3748/wjg.v25.i27.3590
31365159	Inducing remission of Type 2 diabetes in the Caribbean: findings from a mixed methods feasibility study of a low-calorie liquid diet-based intervention in Barbados	Bynoe K, Unwin N, Taylor C, Murphy MM, Bartholomew L, Greenidge A, Abed M, Jeyaseelan S, Cobelli C, Dalla Man C, Taylor R.	Diabet Med. 2020 Nov;37(11):1816-1824. doi: 10.1111/dme.14096. Epub 2019 Aug 12.	Bynoe K	Diabet Med	2020	2019-01-08			10.1111/dme.14096
31359403	One-year caloric restriction and 12-week exercise training intervention in obese adults with type 2 diabetes: emphasis on metabolic control and resting metabolic rate	Zurlo F, Trevisan C, Vitturi N, Ravussin E, Salvò C, Carraro S, Siffi M, Iob I, Saller A, Previato L, Sergi G, de Kreutzenberg S, Maran A, Avogaro A.	J Endocrinol Invest. 2019 Dec;42(12):1497-1507. doi: 10.1007/s40618-019-01090-x. Epub 2019 Jul 29.	Zurlo F	J Endocrinol Invest	2019	31/07/2019			10.1007/s40618-019-01090-x
31357685	A Randomized Double-Blind, Cross-Over Trial of very Low-Calorie Diet in Overweight Migraine Patients: A Possible Role for Ketones?	Di Lorenzo C, Pinto A, Ienca R, Coppola G, Sirianni G, Di Lorenzo G, Parisi V, Serrao M, Spagnoli A, Vestri A, Schoenen J, Donini LM, Pierelli F.	Nutrients. 2019 Jul 28;11(8):1742. doi: 10.3390/nu11081742.	Di Lorenzo C	Nutrients	2019	31/07/2019	PMC6722531		10.3390/nu11081742
31353564	Caloric restriction and redox homeostasis in various regions of aging male rat brain: Is caloric restriction still worth trying even after early-adulthood?: Redox homeostasis and caloric restriction in brain	Yanar K, Simsek B, Çaylı N, Övül Bozkır H, Mengi M, Belce A, Aydin S, Çakatay U.	J Food Biochem. 2019 Mar;43(3):e12740. doi: 10.1111/jfbc.12740. Epub 2018 Dec 5.	Yanar K	J Food Biochem	2019	30/07/2019			10.1111/jfbc.12740
31351172	Periodic dietary restriction ameliorates amyloid pathology and cognitive impairment in PDAPP-J20 mice: Potential implication of glial autophagy	Gregosa A, Vinuesa Á, Todero MF, Pomilio C, Rossi SP, Bentivegna M, Presa J, Wenker S, Saravia F, Beauquis J.	Neurobiol Dis. 2019 Dec;132:104542. doi: 10.1016/j.nbd.2019.104542. Epub 2019 Jul 24.	Gregosa A	Neurobiol Dis	2019	28/07/2019			10.1016/j.nbd.2019.104542
31328895	Differential Effects of Alternate-Day Fasting Versus Daily Calorie Restriction on Insulin Resistance	Gabel K, Kroeger CM, Trepanowski JF, Hoddy KK, Cienfuegos S, Kalam F, Varady KA.	Obesity (Silver Spring). 2019 Sep;27(9):1443-1450. doi: 10.1002/oby.22564. Epub 2019 Jul 22.	Gabel K	Obesity (Silver Spring)	2019	23/07/2019	PMC7138754	NIHMS1033535	10.1002/oby.22564
31325801	Lack of conflict during food choice is associated with the failure of restrained eating	Zhang X, Luo Y, Liu Y, Yang C, Chen H.	Eat Behav. 2019 Aug;34:101309. doi: 10.1016/j.eatbeh.2019.101309. Epub 2019 Jul 6.	Zhang X	Eat Behav	2019	21/07/2019			10.1016/j.eatbeh.2019.101309
31308252	Small-protein Enrichment Assay Enables the Rapid, Unbiased Analysis of Over 100 Low Abundance Factors from Human Plasma	Harney DJ, Hutchison AT, Su Z, Hatchwell L, Heilbronn LK, Hocking S, James DE, Larance M.	Mol Cell Proteomics. 2019 Sep;18(9):1899-1915. doi: 10.1074/mcp.TIR119.001562. Epub 2019 Jul 15.	Harney DJ	Mol Cell Proteomics	2019	17/07/2019	PMC6731089		10.1074/mcp.TIR119.001562
31303391	Calorie restriction in an obesogenic environment: reality or fiction?	Hu FB.	Lancet Diabetes Endocrinol. 2019 Sep;7(9):658-659. doi: 10.1016/S2213-8587(19)30196-2. Epub 2019 Jul 11.	Hu FB	Lancet Diabetes Endocrinol	2019	16/07/2019			10.1016/S2213-8587(19)30196-2
31305908	Perspective: Public Health Nutrition Policies Should Focus on Healthy Eating, Not on Calorie Counting, Even to Decrease Obesity	Fernandes AC, Rieger DK, Proença RPC.	Adv Nutr. 2019 Jul 1;10(4):549-556. doi: 10.1093/advances/nmz025.	Fernandes AC	Adv Nutr	2019	16/07/2019	PMC6628875		10.1093/advances/nmz025
31305927	Appetite Control Is Improved by Acute Increases in Energy Turnover at Different Levels of Energy Balance	Hägele FA, Büsing F, Nas A, Hasler M, Müller MJ, Blundell JE, Bosy-Westphal A.	J Clin Endocrinol Metab. 2019 Oct 1;104(10):4481-4491. doi: 10.1210/jc.2019-01164.	Hägele FA	J Clin Endocrinol Metab	2019	16/07/2019			10.1210/jc.2019-01164
31303390	2 years of calorie restriction and cardiometabolic risk (CALERIE): exploratory outcomes of a multicentre, phase 2, randomised controlled trial	Kraus WE, Bhapkar M, Huffman KM, Pieper CF, Krupa Das S, Redman LM, Villareal DT, Rochon J, Roberts SB, Ravussin E, Holloszy JO, Fontana L; CALERIE Investigators.	Lancet Diabetes Endocrinol. 2019 Sep;7(9):673-683. doi: 10.1016/S2213-8587(19)30151-2. Epub 2019 Jul 11.	Kraus WE	Lancet Diabetes Endocrinol	2019	16/07/2019	PMC6707879	NIHMS1535351	10.1016/S2213-8587(19)30151-2
31302012	Markers of adipose tissue inflammation are transiently elevated during intermittent fasting in women who are overweight or obese	Liu B, Hutchison AT, Thompson CH, Lange K, Heilbronn LK.	Obes Res Clin Pract. 2019 Jul-Aug;13(4):408-415. doi: 10.1016/j.orcp.2019.07.001. Epub 2019 Jul 11.	Liu B	Obes Res Clin Pract	2019	15/07/2019			10.1016/j.orcp.2019.07.001
31298466	Effect of Synbiotic Supplementation in a Very-Low-Calorie Ketogenic Diet on Weight Loss Achievement and Gut Microbiota: A Randomized Controlled Pilot Study	Gutiérrez-Repiso C, Hernández-García C, García-Almeida JM, Bellido D, Martín-Núñez GM, Sánchez-Alcoholado L, Alcaide-Torres J, Sajoux I, Tinahones FJ, Moreno-Indias I.	Mol Nutr Food Res. 2019 Oct;63(19):e1900167. doi: 10.1002/mnfr.201900167. Epub 2019 Aug 29.	Gutiérrez-Repiso C	Mol Nutr Food Res	2019	13/07/2019			10.1002/mnfr.201900167
31277506	Effects of a Personalized VLCKD on Body Composition and Resting Energy Expenditure in the Reversal of Diabetes to Prevent Complications	Romano L, Marchetti M, Gualtieri P, Di Renzo L, Belcastro M, De Santis GL, Perrone MA, De Lorenzo A.	Nutrients. 2019 Jul 4;11(7):1526. doi: 10.3390/nu11071526.	Romano L	Nutrients	2019	2019-07-07	PMC6683248		10.3390/nu11071526
31269276	Behaviour change during dietary Type 2 diabetes remission: a longitudinal qualitative evaluation of an intervention using a very low energy diet	Rehackova L, Araújo-Soares V, Steven S, Adamson AJ, Taylor R, Sniehotta FF.	Diabet Med. 2020 Jun;37(6):953-962. doi: 10.1111/dme.14066. Epub 2019 Aug 8.	Rehackova L	Diabet Med	2020	2019-04-07			10.1111/dme.14066
31269015	Cross-species functional modules link proteostasis to human normal aging	Komljenovic A, Li H, Sorrentino V, Kutalik Z, Auwerx J, Robinson-Rechavi M.	PLoS Comput Biol. 2019 Jul 3;15(7):e1007162. doi: 10.1371/journal.pcbi.1007162. eCollection 2019 Jul.	Komljenovic A	PLoS Comput Biol	2019	2019-04-07	PMC6634426		10.1371/journal.pcbi.1007162
31266827	Physical Activity Plus Energy Restriction Prevents 4T1.2 Mammary Tumor Progression, MDSC Accumulation, and an Immunosuppressive Tumor Microenvironment	Turbitt WJ, Xu Y, Sosnoski DM, Collins SD, Meng H, Mastro AM, Rogers CJ.	Cancer Prev Res (Phila). 2019 Aug;12(8):493-506. doi: 10.1158/1940-6207.CAPR-17-0233. Epub 2019 Jul 2.	Turbitt WJ	Cancer Prev Res (Phila)	2019	2019-04-07			10.1158/1940-6207.CAPR-17-0233
31252598	Six Weeks of Calorie Restriction Improves Body Composition and Lipid Profile in Obese and Overweight Former Athletes	Hołowko J, Michalczyk MM, Zając A, Czerwińska-Rogowska M, Ryterska K, Banaszczak M, Jakubczyk K, Stachowska E.	Nutrients. 2019 Jun 27;11(7):1461. doi: 10.3390/nu11071461.	Hołowko J	Nutrients	2019	30/06/2019	PMC6683015		10.3390/nu11071461
31242952	Predictors of successful weight loss with relative maintenance of fat-free mass in individuals with overweight and obesity on an 8-week low-energy diet	Hansen TT, Hjorth MF, Sandby K, Andersen SV, Astrup A, Ritz C, Bulló M, Camacho-Barcía ML, García-Gavilán JF, Salas-Salvadó J, Harrold JA, Halford JCG, Sjödin A.	Br J Nutr. 2019 Aug 28;122(4):468-479. doi: 10.1017/S0007114519001296. Epub 2019 Jun 27.	Hansen TT	Br J Nutr	2019	28/06/2019			10.1017/S0007114519001296
31241002	Calorie restriction in combination with prebiotic supplementation in obese women with depression: effects on metabolic and clinical response	Vaghef-Mehrabany E, Ranjbar F, Asghari-Jafarabadi M, Hosseinpour-Arjmand S, Ebrahimi-Mameghani M.	Nutr Neurosci. 2021 May;24(5):339-353. doi: 10.1080/1028415X.2019.1630985. Epub 2019 Jun 26.	Vaghef-Mehrabany E	Nutr Neurosci	2021	27/06/2019			10.1080/1028415X.2019.1630985
31238007	Measuring phenotypic flexibility by transcriptome time-course analyses during challenge tests before and after energy restriction	van Bussel IPG, Fazelzadeh P, Frost GS, Rundle M, Afman LA.	FASEB J. 2019 Sep;33(9):10280-10290. doi: 10.1096/fj.201900148R. Epub 2019 Jun 25.	van Bussel IPG	FASEB J	2019	26/06/2019			10.1096/fj.201900148R
31226790	Effects of Intermittent Energy Restriction Combined with a Mediterranean Diet on Reducing Visceral Adiposity: A Randomized Active Comparator Pilot Study	Panizza CE, Lim U, Yonemori KM, Cassel KD, Wilkens LR, Harvie MN, Maskarinec G, Delp EJ, Lampe JW, Shepherd JA, Le Marchand L, Boushey CJ.	Nutrients. 2019 Jun 20;11(6):1386. doi: 10.3390/nu11061386.	Panizza CE	Nutrients	2019	23/06/2019	PMC6627434		10.3390/nu11061386
31216949	Insights From a Short-Term Protein-Calorie Restriction Exploratory Trial in Elective Carotid Endarterectomy Patients	Kip P, Trocha KM, Tao M, O'leary JJ, Ruske J, Giulietti JM, Trevino-Villareal JH, MacArthur MR, Bolze A, Burak MF, Patterson S, Ho KJ, Carmody RN, Guzman RJ, Mitchell JR, Ozaki CK.	Vasc Endovascular Surg. 2019 Aug;53(6):470-476. doi: 10.1177/1538574419856453. Epub 2019 Jun 19.	Kip P	Vasc Endovascular Surg	2019	21/06/2019			10.1177/1538574419856453
31202919	Cognitive aids and food choice: Real-time calorie counters reduce calories ordered and correct biases in calorie estimates	Gustafson CR, Zeballos E.	Appetite. 2019 Oct 1;141:104320. doi: 10.1016/j.appet.2019.104320. Epub 2019 Jun 13.	Gustafson CR	Appetite	2019	17/06/2019			10.1016/j.appet.2019.104320
31199592	Cognitive Effects of Adding Caloric Restriction to Aerobic Exercise Training in Older Adults with Obesity	Hugenschmidt CE, Leng X, Lyles M, Michael L, Dougherty A, Babcock P, Baker LD, Brinkley TE, Nicklas BJ.	Obesity (Silver Spring). 2019 Aug;27(8):1266-1274. doi: 10.1002/oby.22525. Epub 2019 Jun 14.	Hugenschmidt CE	Obesity (Silver Spring)	2019	15/06/2019	PMC6656607	NIHMS1528162	10.1002/oby.22525
31174214	Fiber Intake Predicts Weight Loss and Dietary Adherence in Adults Consuming Calorie-Restricted Diets: The POUNDS Lost (Preventing Overweight Using Novel Dietary Strategies) Study	Miketinas DC, Bray GA, Beyl RA, Ryan DH, Sacks FM, Champagne CM.	J Nutr. 2019 Oct 1;149(10):1742-1748. doi: 10.1093/jn/nxz117.	Miketinas DC	J Nutr	2019	2019-08-06	PMC6768815		10.1093/jn/nxz117
31172178	Metabolic response to fasting predicts weight gain during low-protein overfeeding in lean men: further evidence for spendthrift and thrifty metabolic phenotypes	Hollstein T, Ando T, Basolo A, Krakoff J, Votruba SB, Piaggi P.	Am J Clin Nutr. 2019 Sep 1;110(3):593-604. doi: 10.1093/ajcn/nqz062.	Hollstein T	Am J Clin Nutr	2019	2019-08-06	PMC6895542		10.1093/ajcn/nqz062
31168212	EFFECT OF GROWTH HORMONE THERAPY IN CHILDREN WITH PRADER-WILLI SYNDROME - OUR FIRST EXPERIENCES	Stipančić G, Požgaj Šepec M, La Grasta Sabolić L.	Acta Clin Croat. 2018 Dec;57(4):744-755. doi: 10.20471/acc.2018.57.04.17.	Stipančić G	Acta Clin Croat	2018	2019-07-06	PMC6544111		10.20471/acc.2018.57.04.17
31165446	The association between Food and Alcohol Disturbance (FAD), race, and ethnic identity belonging	Peralta RL, Schnellinger RP, Wade JM, Barr PB, Carter JR.	Eat Weight Disord. 2019 Aug;24(4):705-714. doi: 10.1007/s40519-019-00718-4. Epub 2019 Jun 4.	Peralta RL	Eat Weight Disord	2019	2019-06-06			10.1007/s40519-019-00718-4
31164038	Methionine restriction delays senescence and suppresses the senescence-associated secretory phenotype in the kidney through endogenous hydrogen sulfide	Wang SY, Wang WJ, Liu JQ, Song YH, Li P, Sun XF, Cai GY, Chen XM.	Cell Cycle. 2019 Jul;18(14):1573-1587. doi: 10.1080/15384101.2019.1618124. Epub 2019 Jun 5.	Wang SY	Cell Cycle	2019	2019-06-06	PMC6619995		10.1080/15384101.2019.1618124
31161182	Effect of a balanced nutrition meal replacement diet with altered macromolecular composition along with caloric restriction on body weight control	Lu TM , Chiu HF , Chen YM , Shen YC , Han YC , Venkatakrishnan K , Wang CK .	Food Funct. 2019 Jun 19;10(6):3581-3588. doi: 10.1039/c9fo00192a.	Lu TM	Food Funct	2019	2019-05-06			10.1039/c9fo00192a
31149644	Therapeutic benefit of combining calorie-restricted ketogenic diet and glutamine targeting in late-stage experimental glioblastoma	Mukherjee P, Augur ZM, Li M, Hill C, Greenwood B, Domin MA, Kondakci G, Narain NR, Kiebish MA, Bronson RT, Arismendi-Morillo G, Chinopoulos C, Seyfried TN.	Commun Biol. 2019 May 29;2:200. doi: 10.1038/s42003-019-0455-x. eCollection 2019.	Mukherjee P	Commun Biol	2019	2019-01-06	PMC6541653		10.1038/s42003-019-0455-x
31145121	Low-energy diet and physical activity for the remission of type 2 diabetes: a paradigm shift	Das G.	Curr Opin Lipidol. 2019 Aug;30(4):355-356. doi: 10.1097/MOL.0000000000000618.	Das G	Curr Opin Lipidol	2019	31/05/2019			10.1097/MOL.0000000000000618
31141954	Changes in Anxiety and Depression Traits Induced by Energy Restriction: Predictive Value of the Baseline Status	Rodriguez-Lozada C, Cuervo M, Cuevas-Sierra A, Goni L, Riezu-Boj JI, Navas-Carretero S, Milagro FI, Martinez JA.	Nutrients. 2019 May 28;11(6):1206. doi: 10.3390/nu11061206.	Rodriguez-Lozada C	Nutrients	2019	31/05/2019	PMC6627283		10.3390/nu11061206
31135225	The Effects of Synbiotic Supplementation on Antioxidant Capacity and Arm Volumes in Survivors of Breast Cancer-Related Lymphedema	Navaei M, Haghighat S, Janani L, Vafa S, Saneei Totmaj A, Raji Lahiji M, Emamat H, Salehi Z, Amirinejad A, Izad M, Zarrati M.	Nutr Cancer. 2020;72(1):62-73. doi: 10.1080/01635581.2019.1616781. Epub 2019 May 28.	Navaei M	Nutr Cancer	2020	29/05/2019			10.1080/01635581.2019.1616781
31130296	The effect of complete caloric intake restriction on human body odour quality	Fialová J, Hoffmann R, Roberts SC, Havlíček J.	Physiol Behav. 2019 Oct 15;210:112554. doi: 10.1016/j.physbeh.2019.05.015. Epub 2019 May 23.	Fialová J	Physiol Behav	2019	28/05/2019			10.1016/j.physbeh.2019.05.015
31126121	Role of Calcium and Low-Fat Dairy Foods in Weight-Loss Outcomes Revisited: Results from the Randomized Trial of Effects on Bone and Body Composition in Overweight/Obese Postmenopausal Women	Ilich JZ, Kelly OJ, Liu PY, Shin H, Kim Y, Chi Y, Wickrama KKAS, Colic-Baric I.	Nutrients. 2019 May 23;11(5):1157. doi: 10.3390/nu11051157.	Ilich JZ	Nutrients	2019	26/05/2019	PMC6566640		10.3390/nu11051157
31100870	Natural Isotope Abundances of Carbon and Nitrogen in Tissue Proteins and Amino Acids as Biomarkers of the Decreased Carbohydrate Oxidation and Increased Amino Acid Oxidation Induced by Caloric Restriction under a Maintained Protein Intake in Obese Rats	Huneau JF, Mantha OL, Hermier D, Mathé V, Galmiche G, Mariotti F, Fouillet H.	Nutrients. 2019 May 16;11(5):1087. doi: 10.3390/nu11051087.	Huneau JF	Nutrients	2019	19/05/2019	PMC6567081		10.3390/nu11051087
31102282	Progranulin serum levels and gene expression in subcutaneous vs visceral adipose tissue of severely obese patients undergoing bariatric surgery	Brock J, Schmid A, Karrasch T, Pfefferle P, Schlegel J, Busse I, Hauenschild A, Schmidt B, Koukou M, Arapogianni E, Schultz A, Thomalla M, Akinci S, Kruse J, Padberg W, Schäffler A, Albrecht J.	Clin Endocrinol (Oxf). 2019 Sep;91(3):400-410. doi: 10.1111/cen.14040. Epub 2019 Jun 7.	Brock J	Clin Endocrinol (Oxf)	2019	19/05/2019			10.1111/cen.14040
31082790	Addition of oat bran reduces HDL-C and does not potentialize effect of a low-calorie diet on remission of metabolic syndrome: A pragmatic, randomized, controlled, open-label nutritional trial	Leão LSCS, Aquino LA, Dias JF, Koifman RJ.	Nutrition. 2019 Sep;65:126-130. doi: 10.1016/j.nut.2019.03.007. Epub 2019 Mar 23.	Leão LSCS	Nutrition	2019	15/05/2019			10.1016/j.nut.2019.03.007
31080037	Association of rs670 variant of APOA1 gene with lipid profile and insulin resistance after 9 months of a high protein/low carbohydrate vs a standard hypocaloric diet	Izaola O, Primo D, Gomez Hoyos E, Lopez Gomez JJ, Ortola A, de Luis D.	Clin Nutr. 2020 Apr;39(4):988-993. doi: 10.1016/j.clnu.2019.04.030. Epub 2019 Apr 27.	Izaola O	Clin Nutr	2020	14/05/2019			10.1016/j.clnu.2019.04.030
31075794	Editorial on Sramkova et al., "Apolipoprotein M: a novel adipokine decreasing with obesity and upregulated by calorie restriction"	Ko CW, Qu J, Tso P.	Am J Clin Nutr. 2019 Jun 1;109(6):1495-1496. doi: 10.1093/ajcn/nqz053.	Ko CW	Am J Clin Nutr	2019	2019-11-05	PMC6537933		10.1093/ajcn/nqz053
31067318	Supplemental estrogen and caloric restriction reduce obesity-induced periprostatic white adipose inflammation in mice	Bhardwaj P, Ikeda T, Zhou XK, Wang H, Zheng XE, Giri DD, Elemento O, Verma A, Miyazawa M, Mukherjee S, Falcone DJ, Wendel NK, Scherr DS, Dannenberg AJ.	Carcinogenesis. 2019 Jul 20;40(7):914-923. doi: 10.1093/carcin/bgz088.	Bhardwaj P	Carcinogenesis	2019	2019-09-05	PMC7331453		10.1093/carcin/bgz088
31052277	Effect of Permissive Underfeeding with Intensive Insulin Therapy on MCP-1, sICAM-1, and TF in Critically Ill Patients	Aljada A, AlGwaiz GF, AlAyadhi D, Masuadi E, Zahra M, Al-Matar SH, Al-Bawab A, Tamimi W, Jawdat D, Al-Dawood A, Sakkijha MH, Sadat M, Arabi YM.	Nutrients. 2019 Apr 30;11(5):987. doi: 10.3390/nu11050987.	Aljada A	Nutrients	2019	2019-05-05	PMC6566807		10.3390/nu11050987
31018616	Changes in Pancreatic Fat Content Following Diet-Induced Weight Loss	Jiang Y, Spurny M, Schübel R, Nonnenmacher T, Schlett CL, von Stackelberg O, Ulrich CM, Kaaks R, Kauczor HU, Kühn T, Nattenmüller J.	Nutrients. 2019 Apr 23;11(4):912. doi: 10.3390/nu11040912.	Jiang Y	Nutrients	2019	26/04/2019	PMC6521168		10.3390/nu11040912
31015361	Turning off the Wnt-a dietary restriction switch for healthy aging	Haviv-Chesner A, Henis-Korenblit S.	EMBO Rep. 2019 May;20(5):e48114. doi: 10.15252/embr.201948114. Epub 2019 Apr 23.	Haviv-Chesner A	EMBO Rep	2019	25/04/2019	PMC6500963		10.15252/embr.201948114
31006807	Intermittent Energy Restriction Is a Feasible, Effective, and Acceptable Intervention to Treat Adolescents with Obesity	Jebeile H, Gow ML, Lister NB, Mosalman Haghighi M, Ayer J, Cowell CT, Baur LA, Garnett SP.	J Nutr. 2019 Jul 1;149(7):1189-1197. doi: 10.1093/jn/nxz049.	Jebeile H	J Nutr	2019	23/04/2019			10.1093/jn/nxz049
31002147	Single nucleotide polymorphisms at the ADIPOQ gene locus rs1501299 interact with different type of dietary fatty acids in two hypocaloric diets	de Luis DA, Izaola O, Primo D, Aller R.	Eur Rev Med Pharmacol Sci. 2019 Apr;23(7):2960-2970. doi: 10.26355/eurrev_201904_17577.	de Luis DA	Eur Rev Med Pharmacol Sci	2019	20/04/2019			10.26355/eurrev_201904_17577
30997619	Comparative Effects of Medical Versus Surgical Weight Loss on Body Composition: a Pilot Randomized Trial	Varma S, Lee CJ, Brown TT, Maruthur NM, Schweitzer M, Magnuson T, Kamel I, Clark JM.	Obes Surg. 2019 Aug;29(8):2503-2510. doi: 10.1007/s11695-019-03879-4.	Varma S	Obes Surg	2019	19/04/2019			10.1007/s11695-019-03879-4
30983506	Beverage intake during alternate-day fasting: Relationship to energy intake and body weight	Kalam F, Kroeger CM, Trepanowski JF, Gabel K, Song JH, Cienfuegos S, Varady KA.	Nutr Health. 2019 Sep;25(3):167-171. doi: 10.1177/0260106019841452. Epub 2019 Apr 14.	Kalam F	Nutr Health	2019	16/04/2019	PMC7183821	NIHMS1579438	10.1177/0260106019841452
30982860	Salivary α-amylase copy number is not associated with weight trajectories and glycemic improvements following clinical weight loss: results from a 2-phase dietary intervention study	Valsesia A, Kulkarni SS, Marquis J, Leone P, Mironova P, Walter O, Hjorth MF, Descombes P, Hager J, Saris WH, Astrup A, Darimont C, O'Callaghan NJ.	Am J Clin Nutr. 2019 Apr 1;109(4):1029-1037. doi: 10.1093/ajcn/nqy363.	Valsesia A	Am J Clin Nutr	2019	16/04/2019			10.1093/ajcn/nqy363
30968820	The effect of caloric restriction on working memory in healthy non-obese adults	Leclerc E, Trevizol AP, Grigolon RB, Subramaniapillai M, McIntyre RS, Brietzke E, Mansur RB.	CNS Spectr. 2020 Feb;25(1):2-8. doi: 10.1017/S1092852918001566.	Leclerc E	CNS Spectr	2020	2019-11-04			10.1017/S1092852918001566
30961631	The life expectancy of patients with metabolic syndrome after weight loss: study protocol for a randomized clinical trial (LIFEXPE-RT)	Ospanov O, Yeleuov G, Kadyrova I, Bekmurzinova F.	Trials. 2019 Apr 8;20(1):202. doi: 10.1186/s13063-019-3304-9.	Ospanov O	Trials	2019	2019-10-04	PMC6454761		10.1186/s13063-019-3304-9
30959146	Flash glucose monitoring for the safe use of a 2-day intermittent energy restriction in patients with type 2 diabetes at risk of hypoglycaemia: An exploratory study	Carter S, Clifton PM, Keogh JP.	Diabetes Res Clin Pract. 2019 May;151:138-145. doi: 10.1016/j.diabres.2019.04.013. Epub 2019 Apr 5.	Carter S	Diabetes Res Clin Pract	2019	2019-09-04			10.1016/j.diabres.2019.04.013
30948306	Increased fiber intake predicts the decrease in 2nd phase glucose-induced hyperinsulinemia following a hypocaloric diet in obese subjects	Provost V, Lamantia V, Bissonnette S, Cyr Y, Faraj M.	Nutr Metab Cardiovasc Dis. 2019 May;29(5):504-512. doi: 10.1016/j.numecd.2019.01.014. Epub 2019 Feb 5.	Provost V	Nutr Metab Cardiovasc Dis	2019	2019-06-04			10.1016/j.numecd.2019.01.014
30929899	Mitochondrial Permeability Uncouples Elevated Autophagy and Lifespan Extension	Zhou B, Kreuzer J, Kumsta C, Wu L, Kamer KJ, Cedillo L, Zhang Y, Li S, Kacergis MC, Webster CM, Fejes-Toth G, Naray-Fejes-Toth A, Das S, Hansen M, Haas W, Soukas AA.	Cell. 2019 Apr 4;177(2):299-314.e16. doi: 10.1016/j.cell.2019.02.013. Epub 2019 Mar 28.	Zhou B	Cell	2019	2019-02-04	PMC6610881	NIHMS1523853	10.1016/j.cell.2019.02.013
30923193	T cell stemness and dysfunction in tumors are triggered by a common mechanism	Vodnala SK, Eil R, Kishton RJ, Sukumar M, Yamamoto TN, Ha NH, Lee PH, Shin M, Patel SJ, Yu Z, Palmer DC, Kruhlak MJ, Liu X, Locasale JW, Huang J, Roychoudhuri R, Finkel T, Klebanoff CA, Restifo NP.	Science. 2019 Mar 29;363(6434):eaau0135. doi: 10.1126/science.aau0135.	Vodnala SK	Science	2019	30/03/2019	PMC8194369	NIHMS1701957	10.1126/science.aau0135
30902672	The effect of intermittent compared with continuous energy restriction on glycaemic control in patients with type 2 diabetes: 24-month follow-up of a randomised noninferiority trial	Carter S, Clifton PM, Keogh JB.	Diabetes Res Clin Pract. 2019 May;151:11-19. doi: 10.1016/j.diabres.2019.03.022. Epub 2019 Mar 19.	Carter S	Diabetes Res Clin Pract	2019	24/03/2019			10.1016/j.diabres.2019.03.022
30884788	Key Genes of Lipid Metabolism and WNT-Signaling Are Downregulated in Subcutaneous Adipose Tissue with Moderate Weight Loss	Schübel R, Sookthai D, Greimel J, Johnson TS, Grafetstätter ME, Kirsten R, Kratz M, Ulrich CM, Kaaks R, Kühn T.	Nutrients. 2019 Mar 16;11(3):639. doi: 10.3390/nu11030639.	Schübel R	Nutrients	2019	20/03/2019	PMC6471921		10.3390/nu11030639
30888593	Four Weeks of Preoperative Omega-3 Fatty Acids Reduce Liver Volume: a Randomised Controlled Trial	Bakker N, van den Helder RS, Geenen RWF, Hunfeld MA, Cense HA, Demirkiran A, Houdijk APJ.	Obes Surg. 2019 Jul;29(7):2037-2044. doi: 10.1007/s11695-019-03814-7.	Bakker N	Obes Surg	2019	20/03/2019			10.1007/s11695-019-03814-7
30869115	Apolipoprotein M: a novel adipokine decreasing with obesity and upregulated by calorie restriction	Sramkova V, Berend S, Siklova M, Caspar-Bauguil S, Carayol J, Bonnel S, Marques M, Decaunes P, Kolditz CI, Dahlman I, Arner P, Stich V, Saris WHM, Astrup A, Valsesia A, Rossmeislova L, Langin D, Viguerie N.	Am J Clin Nutr. 2019 Jun 1;109(6):1499-1510. doi: 10.1093/ajcn/nqy331.	Sramkova V	Am J Clin Nutr	2019	15/03/2019			10.1093/ajcn/nqy331
30862999	Comprehensive lifestyle intervention vs soy protein-based meal regimen in non-alcoholic steatohepatitis	Deibert P, Lazaro A, Schaffner D, Berg A, Koenig D, Kreisel W, Baumstark MW, Steinmann D, Buechert M, Lange T.	World J Gastroenterol. 2019 Mar 7;25(9):1116-1131. doi: 10.3748/wjg.v25.i9.1116.	Deibert P	World J Gastroenterol	2019	14/03/2019	PMC6406181		10.3748/wjg.v25.i9.1116
30846706	Overeating, caloric restriction and breast cancer risk by pathologic subtype: the EPIGEICAM study	Lope V, Martín M, Castelló A, Ruiz A, Casas AM, Baena-Cañada JM, Antolín S, Ramos-Vázquez M, García-Sáenz JÁ, Muñoz M, Lluch A, de Juan-Ferré A, Jara C, Sánchez-Rovira P, Antón A, Chacón JI, Arcusa A, Jimeno MA, Bezares S, Vioque J, Carrasco E, Pérez-Gómez B, Pollán M.	Sci Rep. 2019 Mar 7;9(1):3904. doi: 10.1038/s41598-019-39346-4.	Lope V	Sci Rep	2019	2019-09-03	PMC6405854		10.1038/s41598-019-39346-4
30849296	Long-Term Effects of Randomization to a Weight Loss Intervention in Older Adults: A Pilot Study	Houston DK, Miller ME, Kitzman DW, Rejeski WJ, Messier SP, Lyles MF, Kritchevsky SB, Nicklas BJ.	J Nutr Gerontol Geriatr. 2019 Jan-Mar;38(1):83-99. doi: 10.1080/21551197.2019.1572570. Epub 2019 Mar 8.	Houston DK	J Nutr Gerontol Geriatr	2019	2019-09-03	PMC6447460	NIHMS1012311	10.1080/21551197.2019.1572570
30831453	Two days of calorie deprivation impairs high level cognitive processes, mood, and self-reported exertion during aerobic exercise: A randomized double-blind, placebo-controlled study	Giles GE, Mahoney CR, Caruso C, Bukhari AS, Smith TJ, Pasiakos SM, McClung JP, Lieberman HR.	Brain Cogn. 2019 Jun;132:33-40. doi: 10.1016/j.bandc.2019.02.003. Epub 2019 Mar 2.	Giles GE	Brain Cogn	2019	2019-05-03			10.1016/j.bandc.2019.02.003
30825528	Establishing an Effective Weight Loss Program in a Community-Based Gastroenterology Practice: The Huron Gastro Experience	Hawa F, Gunaratnam NT.	Clin Gastroenterol Hepatol. 2019 Aug;17(9):1669-1672. doi: 10.1016/j.cgh.2019.02.036. Epub 2019 Feb 27.	Hawa F	Clin Gastroenterol Hepatol	2019	2019-03-03			10.1016/j.cgh.2019.02.036
30821134	Acute and chronic effect of bariatric surgery on circulating autotaxin levels	Bourgeois R, Piché ME, Auclair A, Grenier-Larouche T, Mitchell PL, Poirier P, Biertho L, Marceau S, Hould FS, Biron S, Lebel S, Lescelleur O, Julien F, Martin J, Tchernof A, Mathieu P, Carpentier AC, Arsenault BJ.	Physiol Rep. 2019 Mar;7(5):e14004. doi: 10.14814/phy2.14004.	Bourgeois R	Physiol Rep	2019	2019-02-03	PMC6395307		10.14814/phy2.14004
30816651	[Obesity cannot be solved by meal replacements]	van Rossum EFC, van der Voorn B.	Ned Tijdschr Geneeskd. 2019 Feb 19;163:D3805.	van Rossum EFC	Ned Tijdschr Geneeskd	2019	2019-01-03
30813612	Predictors of Lifestyle Intervention Attrition or Weight Loss Success in Women with Polycystic Ovary Syndrome Who Are Overweight or Obese	Moran LJ, Noakes M, Clifton P, Buckley J, Brinkworth G, Thomson R, Norman RJ.	Nutrients. 2019 Feb 26;11(3):492. doi: 10.3390/nu11030492.	Moran LJ	Nutrients	2019	2019-01-03	PMC6470873		10.3390/nu11030492
30794431	Maintenance of skeletal muscle function following reduced daily physical activity in healthy older adults: a pilot trial	Oikawa SY, Callahan DM, McGlory C, Toth MJ, Phillips SM.	Appl Physiol Nutr Metab. 2019 Oct;44(10):1052-1056. doi: 10.1139/apnm-2018-0631. Epub 2019 Feb 22.	Oikawa SY	Appl Physiol Nutr Metab	2019	23/02/2019	PMC7278031	NIHMS1592901	10.1139/apnm-2018-0631
30788716	Perioperative and Postoperative Effects of Preoperative Low-Calorie Restrictive Diets on Patients Undergoing Laparoscopic Sleeve Gastrectomy	Ekici U, Ferhatoglu MF.	J Gastrointest Surg. 2020 Feb;24(2):313-319. doi: 10.1007/s11605-019-04157-5. Epub 2019 Feb 20.	Ekici U	J Gastrointest Surg	2020	22/02/2019			10.1007/s11605-019-04157-5
30781774	Free Fatty Acids' Level and Nutrition in Critically Ill Patients and Association with Outcomes: A Prospective Sub-Study of PermiT Trial	Arabi YM, Tamimi W, Jones G, Jawdat D, Tamim H, Al-Dorzi HM, Sadat M, Afesh L, Sakhija M, Al-Dawood A.	Nutrients. 2019 Feb 13;11(2):384. doi: 10.3390/nu11020384.	Arabi YM	Nutrients	2019	21/02/2019	PMC6412238		10.3390/nu11020384
30772158	Self-Reported Body Weight Changes, Perceptions, and Weight Loss Techniques among Stroke Survivors	Kelleher JL, Weiss P, Rodriguez AD, Nocera JR, Serra MC.	J Stroke Cerebrovasc Dis. 2019 May;28(5):1317-1322. doi: 10.1016/j.jstrokecerebrovasdis.2019.01.028. Epub 2019 Feb 14.	Kelleher JL	J Stroke Cerebrovasc Dis	2019	18/02/2019			10.1016/j.jstrokecerebrovasdis.2019.01.028
30761964	Effect of an individualised high-protein, energy-restricted diet on anthropometric and cardio-metabolic parameters in overweight and obese Malaysian adults: a 6-month randomised controlled study	Mitra SR, Tan PY.	Br J Nutr. 2019 May;121(9):1002-1017. doi: 10.1017/S0007114519000345. Epub 2019 Feb 14.	Mitra SR	Br J Nutr	2019	15/02/2019			10.1017/S0007114519000345
30759784	Effect of Alpha-Lipoic Acid Supplementation on Endothelial Function and Cardiovascular Risk Factors in Overweight/Obese Youths: A Double-Blind, Placebo-Controlled Randomized Trial	Tromba L, Perla FM, Carbotta G, Chiesa C, Pacifico L.	Nutrients. 2019 Feb 12;11(2):375. doi: 10.3390/nu11020375.	Tromba L	Nutrients	2019	15/02/2019	PMC6412308		10.3390/nu11020375
30744621	Effect of diet with or without exercise on abdominal fat in postmenopausal women - a randomised trial	van Gemert WA, Peeters PH, May AM, Doornbos AJH, Elias SG, van der Palen J, Veldhuis W, Stapper M, Schuit JA, Monninkhof EM.	BMC Public Health. 2019 Feb 11;19(1):174. doi: 10.1186/s12889-019-6510-1.	van Gemert WA	BMC Public Health	2019	13/02/2019	PMC6371569		10.1186/s12889-019-6510-1
30721948	Potential effects of reduced red meat compared with increased fiber intake on glucose metabolism and liver fat content: a randomized and controlled dietary intervention study	Willmann C, Heni M, Linder K, Wagner R, Stefan N, Machann J, Schulze MB, Joost HG, Häring HU, Fritsche A.	Am J Clin Nutr. 2019 Feb 1;109(2):288-296. doi: 10.1093/ajcn/nqy307.	Willmann C	Am J Clin Nutr	2019	2019-06-02			10.1093/ajcn/nqy307
30694977	Metabolic Implications of Diet and Energy Intake during Physical Inactivity	Winn NC, Pettit-Mee R, Walsh LK, Restaino RM, Ready ST, Padilla J, Kanaley JA.	Med Sci Sports Exerc. 2019 May;51(5):995-1005. doi: 10.1249/MSS.0000000000001892.	Winn NC	Med Sci Sports Exerc	2019	30/01/2019	PMC6465093	NIHMS1518228	10.1249/MSS.0000000000001892
30683825	The influence of orlistat, metformin and diet on serum levels of insulin-like growth factor-1 in obeses women with and without insulin resistance	Kujawska-Luczak M, Szulinska M, Skrypnik D, Musialik K, Swora-Cwynar E, Kregielska-Narozna M, Markuszewski L, Grzymislawska M, Bogdanski P.	J Physiol Pharmacol. 2018 Oct;69(5). doi: 10.26402/jpp.2018.5.08. Epub 2019 Jan 21.	Kujawska-Luczak M	J Physiol Pharmacol	2018	27/01/2019			10.26402/jpp.2018.5.08
30654453	Effects of Lifestyle Intervention on Plasma Trimethylamine N-Oxide in Obese Adults	Erickson ML, Malin SK, Wang Z, Brown JM, Hazen SL, Kirwan JP.	Nutrients. 2019 Jan 16;11(1):179. doi: 10.3390/nu11010179.	Erickson ML	Nutrients	2019	19/01/2019	PMC6356515		10.3390/nu11010179
30658196	Changes in IGFBP-2 levels following a one-year lifestyle modification program are independently related to improvements in plasma apo B and LDL apo B levels	Carter S, Lemieux I, Li Z, Alméras N, Tremblay A, Bergeron J, Poirier P, Després JP, Picard F.	Atherosclerosis. 2019 Feb;281:89-97. doi: 10.1016/j.atherosclerosis.2018.12.016. Epub 2018 Dec 23.	Carter S	Atherosclerosis	2019	19/01/2019			10.1016/j.atherosclerosis.2018.12.016
30646030	Effect of Intermittent Compared With Continuous Energy Restricted Diet on Glycemic Control in Patients With Type 2 Diabetes: A Randomized Noninferiority Trial	Carter S, Clifton PM, Keogh JB.	JAMA Netw Open. 2018 Jul 6;1(3):e180756. doi: 10.1001/jamanetworkopen.2018.0756.	Carter S	JAMA Netw Open	2018	16/01/2019	PMC6324303		10.1001/jamanetworkopen.2018.0756
30638263	Relationship between three factor eating questionnaire-restraint subscale and food intake	Zambrowicz R, Schebendach J, Sysko R, Mayer LES, Walsh BT, Steinglass JE.	Int J Eat Disord. 2019 Mar;52(3):255-260. doi: 10.1002/eat.23014. Epub 2019 Jan 14.	Zambrowicz R	Int J Eat Disord	2019	15/01/2019	PMC6601332	NIHMS1037935	10.1002/eat.23014
30629126	Effect of an Energy-Restricted, Nutritionally Complete, Higher Protein Meal Plan on Body Composition and Mobility in Older Adults With Obesity: A Randomized Controlled Trial	Beavers KM, Nesbit BA, Kiel JR, Sheedy JL, Arterburn LM, Collins AE, Ford SA, Henderson RM, Coleman CD, Beavers DP.	J Gerontol A Biol Sci Med Sci. 2019 May 16;74(6):929-935. doi: 10.1093/gerona/gly146.	Beavers KM	J Gerontol A Biol Sci Med Sci	2019	2019-11-01	PMC6521917		10.1093/gerona/gly146
30622308	Dietary weight loss intervention improves subclinical atherosclerosis and oxidative stress markers in leukocytes of obese humans	López-Domènech S, Martínez-Herrera M, Abad-Jiménez Z, Morillas C, Escribano-López I, Díaz-Morales N, Bañuls C, Víctor VM, Rocha M.	Int J Obes (Lond). 2019 Nov;43(11):2200-2209. doi: 10.1038/s41366-018-0309-5. Epub 2019 Jan 8.	López-Domènech S	Int J Obes (Lond)	2019	2019-10-01			10.1038/s41366-018-0309-5
30624598	Effect of a hypocaloric, nutritionally complete, higher-protein meal plan on bone density and quality in older adults with obesity: a randomized trial	Weaver AA, Houston DK, Shapses SA, Lyles MF, Henderson RM, Beavers DP, Baker AC, Beavers KM.	Am J Clin Nutr. 2019 Feb 1;109(2):478-486. doi: 10.1093/ajcn/nqy237.	Weaver AA	Am J Clin Nutr	2019	2019-10-01	PMC6367970		10.1093/ajcn/nqy237
30615631	Permissive underfeeding, cytokine profiles and outcomes in critically ill patients	Arabi Y, Jawdat D, Bouchama A, Tamim H, Tamimi W, Al-Balwi M, Al-Dorzi HM, Sadat M, Afesh L, Abdullah ML, Mashaqbeh W, Sakhija M, Hussein MA, ElObeid A, Al-Dawood A.	PLoS One. 2019 Jan 7;14(1):e0209669. doi: 10.1371/journal.pone.0209669. eCollection 2019.	Arabi Y	PLoS One	2019	2019-08-01	PMC6322779		10.1371/journal.pone.0209669
30615947	Effects of alternate day fasting and exercise on cholesterol metabolism in overweight or obese adults: A pilot randomized controlled trial	Cho AR, Moon JY, Kim S, An KY, Oh M, Jeon JY, Jung DH, Choi MH, Lee JW.	Metabolism. 2019 Apr;93:52-60. doi: 10.1016/j.metabol.2019.01.002. Epub 2019 Jan 4.	Cho AR	Metabolism	2019	2019-08-01			10.1016/j.metabol.2019.01.002
30610376	Mitochondria Inspire a Lifestyle	Kramer P, Bressan P.	Adv Anat Embryol Cell Biol. 2019;231:105-126. doi: 10.1007/102_2018_5.	Kramer P	Adv Anat Embryol Cell Biol	2019	2019-06-01			10.1007/102_2018_5
30588190	Infrequent Feeding of Restricted Amounts of Food Induces Stress and Adipose Tissue Inflammation, Contributing to Impaired Glucose Metabolism	Lee YS, Lee C, Jun HS.	Int J Med Sci. 2018 Nov 5;15(14):1667-1675. doi: 10.7150/ijms.28503. eCollection 2018.	Lee YS	Int J Med Sci	2018	28/12/2018	PMC6299402		10.7150/ijms.28503
30583725	Intermittent versus continuous energy restriction on weight loss and cardiometabolic outcomes: a systematic review and meta-analysis of randomized controlled trials	Cioffi I, Evangelista A, Ponzo V, Ciccone G, Soldati L, Santarpia L, Contaldo F, Pasanisi F, Ghigo E, Bo S.	J Transl Med. 2018 Dec 24;16(1):371. doi: 10.1186/s12967-018-1748-4.	Cioffi I	J Transl Med	2018	26/12/2018	PMC6304782		10.1186/s12967-018-1748-4
30580636	The effect of weight loss program on serum anti-Müllerian hormone level in obese and overweight infertile women with polycystic ovary syndrome	Moini A, Arabipoor A, Hemat M, Ahmadi J, Salman-Yazdi R, Zolfaghari Z.	Gynecol Endocrinol. 2019 Feb;35(2):119-123. doi: 10.1080/09513590.2018.1499084. Epub 2018 Dec 22.	Moini A	Gynecol Endocrinol	2019	25/12/2018			10.1080/09513590.2018.1499084
30573851	Differential Gene Expression in Peripheral White Blood Cells with Permissive Underfeeding and Standard Feeding in Critically Ill Patients: A Descriptive Sub-study of the PermiT Randomized Controlled Trial	Arabi YM, Al-Balwi M, Hajeer AH, Jawdat D, Sadat M, Al-Dorzi HM, Tamim H, Afesh L, Almashaqbeh W, Alkadi H, Alwadaani D, UdayaRaja GK, Abdulkareem IBA, Al-Dawood A.	Sci Rep. 2018 Dec 20;8(1):17984. doi: 10.1038/s41598-018-36007-w.	Arabi YM	Sci Rep	2018	22/12/2018	PMC6301949		10.1038/s41598-018-36007-w
30565772	Filling the intervention gap: service evaluation of an intensive nonsurgical weight management programme for severe and complex obesity	McCombie L, Brosnahan N, Ross H, Bell-Higgs A, Govan L, Lean MEJ.	J Hum Nutr Diet. 2019 Jun;32(3):329-337. doi: 10.1111/jhn.12611. Epub 2018 Nov 22.	McCombie L	J Hum Nutr Diet	2019	20/12/2018			10.1111/jhn.12611
30558396	The Central European diet as an alternative to the Mediterranean diet in atherosclerosis prevention in postmenopausal obese women with a high risk of metabolic syndrome - a randomized nutrition-al trial	Duś-Żuchowska M, Bajerska J, Krzyżanowska P, Chmurzyńska A, Miśkiewicz-Chotnicka A, Muzsik A, Walkowiak J.	Acta Sci Pol Technol Aliment. 2018 Oct-Dec;17(4):399-407. doi: 10.17306/J.AFS.0593.	Duś-Żuchowska M	Acta Sci Pol Technol Aliment	2018	19/12/2018			10.17306/J.AFS.0593
30540565	mTOR, glycotoxins and the parallel universe	Green AS.	Aging (Albany NY). 2018 Dec 12;10(12):3654-3656. doi: 10.18632/aging.101720.	Green AS	Aging (Albany NY)	2018	13/12/2018	PMC6326656		10.18632/aging.101720
30530923	Caloric restriction rescues yeast cells from alpha-synuclein toxicity through autophagic control of proteostasis	Sampaio-Marques B, Pereira H, Santos AR, Teixeira A, Ludovico P.	Aging (Albany NY). 2018 Dec 7;10(12):3821-3833. doi: 10.18632/aging.101675.	Sampaio-Marques B	Aging (Albany NY)	2018	2018-12-12	PMC6326672		10.18632/aging.101675
30526078	The optimization of prebiotic sucrose-free mango nectar by response surface methodology: The effect of stevia and inulin on physicochemical and rheological properties	Alizadeh A, Oskuyi AS, Amjadi S.	Food Sci Technol Int. 2019 Apr;25(3):243-251. doi: 10.1177/1082013218818016. Epub 2018 Dec 10.	Alizadeh A	Food Sci Technol Int	2019	2018-12-12			10.1177/1082013218818016
30522767	The proteome microenvironment determines the protective effect of preconditioning in cisplatin-induced acute kidney injury	Späth MR, Bartram MP, Palacio-Escat N, Hoyer KJR, Debes C, Demir F, Schroeter CB, Mandel AM, Grundmann F, Ciarimboli G, Beyer A, Kizhakkedathu JN, Brodesser S, Göbel H, Becker JU, Benzing T, Schermer B, Höhne M, Burst V, Saez-Rodriguez J, Huesgen PF, Müller RU, Rinschen MM.	Kidney Int. 2019 Feb;95(2):333-349. doi: 10.1016/j.kint.2018.08.037. Epub 2018 Dec 3.	Späth MR	Kidney Int	2019	2018-08-12			10.1016/j.kint.2018.08.037
30518130	Effect of a Whey Protein Supplement on Preservation of Fat Free Mass in Overweight and Obese Individuals on an Energy Restricted Very Low Caloric Diet	Larsen AE, Bibby BM, Hansen M.	Nutrients. 2018 Dec 4;10(12):1918. doi: 10.3390/nu10121918.	Larsen AE	Nutrients	2018	2018-07-12	PMC6315656		10.3390/nu10121918
30514331	Co-occurring KRAS mutation/LKB1 loss in non-small cell lung cancer cells results in enhanced metabolic activity susceptible to caloric restriction: an in vitro integrated multilevel approach	Caiola E, Falcetta F, Giordano S, Marabese M, Garassino MC, Broggini M, Pastorelli R, Brunelli L.	J Exp Clin Cancer Res. 2018 Dec 4;37(1):302. doi: 10.1186/s13046-018-0954-5.	Caiola E	J Exp Clin Cancer Res	2018	2018-06-12	PMC6280460		10.1186/s13046-018-0954-5
30501657	Offspring from maternal nutrient restriction in mice show variations in adult glucose metabolism similar to human fetal growth restriction	Radford BN, Han VKM.	J Dev Orig Health Dis. 2019 Aug;10(4):469-478. doi: 10.1017/S2040174418000983. Epub 2018 Dec 3.	Radford BN	J Dev Orig Health Dis	2019	2018-04-12			10.1017/S2040174418000983
30508762	Role of the variant in adiponectin gene rs266729 on weight loss and cardiovascular risk factors after a hypocaloric diet with the Mediterranean pattern	de Luis DA, Primo D, Izaola O, Gomez Hoyos E, Lopez Gomez JJ, Ortola A, Aller R.	Nutrition. 2019 Apr;60:1-5. doi: 10.1016/j.nut.2018.08.018. Epub 2018 Aug 23.	de Luis DA	Nutrition	2019	2018-04-12			10.1016/j.nut.2018.08.018
30497926	Dietary weight loss in insulin-resistant non-obese humans: Metabolic benefits and relationship to adipose cell size	McLaughlin T, Abbasi F, Lamendola C, Yee G, Carter S, Cushman SW.	Nutr Metab Cardiovasc Dis. 2019 Jan;29(1):62-68. doi: 10.1016/j.numecd.2018.09.014. Epub 2018 Oct 11.	McLaughlin T	Nutr Metab Cardiovasc Dis	2019	2018-01-12	PMC6410738	NIHMS1514471	10.1016/j.numecd.2018.09.014
30486868	ACTonHEALTH study protocol: promoting psychological flexibility with activity tracker and mHealth tools to foster healthful lifestyle for obesity and other chronic health conditions	Cattivelli R, Castelnuovo G, Musetti A, Varallo G, Spatola CAM, Riboni FV, Usubini AG, Tosolin F, Manzoni GM, Capodaglio P, Rossi A, Pietrabissa G, Molinari E.	Trials. 2018 Nov 29;19(1):659. doi: 10.1186/s13063-018-2968-x.	Cattivelli R	Trials	2018	30/11/2018	PMC6262958		10.1186/s13063-018-2968-x
30481042	Short-term low-calorie diet remodels skeletal muscle lipid profile and metabolic gene expression in obese adults	Nylén C, Lundell LS, Massart J, Zierath JR, Näslund E.	Am J Physiol Endocrinol Metab. 2019 Feb 1;316(2):E178-E185. doi: 10.1152/ajpendo.00253.2018. Epub 2018 Nov 27.	Nylén C	Am J Physiol Endocrinol Metab	2019	28/11/2018			10.1152/ajpendo.00253.2018
30475957	Effects of intermittent and continuous calorie restriction on body weight and metabolism over 50 wk: a randomized controlled trial	Schübel R, Nattenmüller J, Sookthai D, Nonnenmacher T, Graf ME, Riedl L, Schlett CL, von Stackelberg O, Johnson T, Nabers D, Kirsten R, Kratz M, Kauczor HU, Ulrich CM, Kaaks R, Kühn T.	Am J Clin Nutr. 2018 Nov 1;108(5):933-945. doi: 10.1093/ajcn/nqy196.	Schübel R	Am J Clin Nutr	2018	27/11/2018	PMC6915821		10.1093/ajcn/nqy196
30475966	Intermittent calorie restriction-a more effective approach to weight loss?	Sundfør TM, Svendsen M, Tonstad S.	Am J Clin Nutr. 2018 Nov 1;108(5):909-910. doi: 10.1093/ajcn/nqy288.	Sundfør TM	Am J Clin Nutr	2018	27/11/2018			10.1093/ajcn/nqy288
30473444	Treatment of malignant gliomas with ketogenic or caloric restricted diets: A systematic review of preclinical and early clinical studies	Noorlag L, De Vos FY, Kok A, Broekman MLD, Seute T, Robe PA, Snijders TJ.	Clin Nutr. 2019 Oct;38(5):1986-1994. doi: 10.1016/j.clnu.2018.10.024. Epub 2018 Nov 14.	Noorlag L	Clin Nutr	2019	27/11/2018			10.1016/j.clnu.2018.10.024
30472037	Improvement of microvascular endothelial dysfunction induced by exercise and diet is associated with microRNA-126 in obese adolescents	Donghui T, Shuang B, Xulong L, Meng Y, Yujing G, Yujie H, Juan L, Dongsheng Y.	Microvasc Res. 2019 May;123:86-91. doi: 10.1016/j.mvr.2018.10.009. Epub 2018 Nov 22.	Donghui T	Microvasc Res	2019	26/11/2018			10.1016/j.mvr.2018.10.009
30470803	The effect of a very low calorie diet on subjective depressive symptoms and anxiety: meta-analysis and systematic review	Ein N, Armstrong B, Vickers K.	Int J Obes (Lond). 2019 Jul;43(7):1444-1455. doi: 10.1038/s41366-018-0245-4. Epub 2018 Nov 23.	Ein N	Int J Obes (Lond)	2019	25/11/2018			10.1038/s41366-018-0245-4
30470804	Effect of intermittent compared to continuous energy restriction on weight loss and weight maintenance after 12 months in healthy overweight or obese adults	Headland ML, Clifton PM, Keogh JB.	Int J Obes (Lond). 2019 Oct;43(10):2028-2036. doi: 10.1038/s41366-018-0247-2. Epub 2018 Nov 23.	Headland ML	Int J Obes (Lond)	2019	25/11/2018			10.1038/s41366-018-0247-2
30469333	Lipoprotein Subclass Profile after Progressive Energy Deficits Induced by Calorie Restriction or Exercise	Chooi YC, Ding C, Chan Z, Lo J, Choo J, Ding BTK, Leow MK, Magkos F.	Nutrients. 2018 Nov 21;10(11):1814. doi: 10.3390/nu10111814.	Chooi YC	Nutrients	2018	25/11/2018	PMC6266835		10.3390/nu10111814
30467071	Role of rs670 variant of APOA1 gene on metabolic response after a high fat vs. a low fat hypocaloric diets in obese human subjects	de Luis D, Izaola O, Primo D, Aller R.	J Diabetes Complications. 2019 Mar;33(3):249-254. doi: 10.1016/j.jdiacomp.2018.10.015. Epub 2018 Nov 3.	de Luis D	J Diabetes Complications	2019	24/11/2018			10.1016/j.jdiacomp.2018.10.015
30464235	Very low calorie diets are associated with transient ventricular impairment before reversal of diastolic dysfunction in obesity	Rayner JJ, Abdesselam I, Peterzan MA, Akoumianakis I, Akawi N, Antoniades C, Tomlinson JW, Neubauer S, Rider OJ.	Int J Obes (Lond). 2019 Dec;43(12):2536-2544. doi: 10.1038/s41366-018-0263-2. Epub 2018 Nov 21.	Rayner JJ	Int J Obes (Lond)	2019	23/11/2018	PMC6892735		10.1038/s41366-018-0263-2
30448823	Disease or not, aging is easily treatable	Blagosklonny MV.	Aging (Albany NY). 2018 Nov 17;10(11):3067-3078. doi: 10.18632/aging.101647.	Blagosklonny MV	Aging (Albany NY)	2018	19/11/2018	PMC6286826		10.18632/aging.101647
30445718	Associations of Brain Reactivity to Food Cues with Weight Loss, Protein Intake and Dietary Restraint during the PREVIEW Intervention	Drummen M, Dorenbos E, Vreugdenhil ACE, Stratton G, Raben A, Westerterp-Plantenga MS, Adam TC.	Nutrients. 2018 Nov 15;10(11):1771. doi: 10.3390/nu10111771.	Drummen M	Nutrients	2018	18/11/2018	PMC6266251		10.3390/nu10111771
30429410	Effects of a diet with or without physical activity on angiopoietin-like protein 8 concentrations in overweight/obese patients with newly diagnosed type 2 diabetes: a randomized controlled trial	Hu H, Yuan G, Wang X, Sun J, Gao Z, Zhou T, Yin W, Cai R, Ye X, Wang Z.	Endocr J. 2019 Jan 28;66(1):89-105. doi: 10.1507/endocrj.EJ18-0191. Epub 2018 Nov 15.	Hu H	Endocr J	2019	16/11/2018			10.1507/endocrj.EJ18-0191
30424822	Effectiveness of the physical activity intervention program in the PREDIMED-Plus study: a randomized controlled trial	Schröder H, Cárdenas-Fuentes G, Martínez-González MA, Corella D, Vioque J, Romaguera D, Alfredo Martínez J, Tinahones FJ, Miranda JL, Estruch R, Bueno-Cavanillas A, Arós F, Marcos A, Tur JA, Warnberg J, Serra-Majem L, Martín V, Vázquez C, Lapetra J, Pintó X, Vidal J, Daimiel L, Gaforio JJ, Matía-Martín P, Ros E, Castañer O, Lassale C, Ruiz-Canela M, Asensio EM, Basora J, Torres-Collado L, Garcia-…	Int J Behav Nutr Phys Act. 2018 Nov 13;15(1):110. doi: 10.1186/s12966-018-0741-x.	Schröder H	Int J Behav Nutr Phys Act	2018	15/11/2018	PMC6234632		10.1186/s12966-018-0741-x
30401004	24-h severe energy restriction impairs postprandial glycaemic control in young, lean males	Clayton DJ, Biddle J, Maher T, Funnell MP, Sargeant JA, King JA, Hulston CJ, Stensel DJ, James LJ.	Br J Nutr. 2018 Nov;120(10):1107-1116. doi: 10.1017/S0007114518002568.	Clayton DJ	Br J Nutr	2018	2018-08-11			10.1017/S0007114518002568
30394353	Psychometric Testing of the Indonesian Version of Dietary Sodium Restriction Questionnaire Among Patients with Hypertension	Wicaksana AL, Wang ST.	Asian Nurs Res (Korean Soc Nurs Sci). 2018 Dec;12(4):279-285. doi: 10.1016/j.anr.2018.10.005. Epub 2018 Oct 27.	Wicaksana AL	Asian Nurs Res (Korean Soc Nurs Sci)	2018	2018-06-11			10.1016/j.anr.2018.10.005
30389673	Effect of a Lifestyle Intervention Program With Energy-Restricted Mediterranean Diet and Exercise on Weight Loss and Cardiovascular Risk Factors: One-Year Results of the PREDIMED-Plus Trial	Salas-Salvadó J, Díaz-López A, Ruiz-Canela M, Basora J, Fitó M, Corella D, Serra-Majem L, Wärnberg J, Romaguera D, Estruch R, Vidal J, Martínez JA, Arós F, Vázquez C, Ros E, Vioque J, López-Miranda J, Bueno-Cavanillas A, Tur JA, Tinahones FJ, Martín V, Lapetra J, Pintó X, Daimiel L, Delgado-Rodríguez M, Matía P, Gómez-Gracia E, Díez-Espino J, Babio N, Castañer O, Sorlí JV, Fiol M, Zulet MÁ, Bulló…	Diabetes Care. 2019 May;42(5):777-788. doi: 10.2337/dc18-0836. Epub 2018 Nov 2.	Salas-Salvadó J	Diabetes Care	2019	2018-04-11			10.2337/dc18-0836
30385096	Moderate weight loss attenuates chronic endoplasmic reticulum stress and mitochondrial dysfunction in human obesity	López-Domènech S, Abad-Jiménez Z, Iannantuoni F, de Marañón AM, Rovira-Llopis S, Morillas C, Bañuls C, Víctor VM, Rocha M.	Mol Metab. 2019 Jan;19:24-33. doi: 10.1016/j.molmet.2018.10.005. Epub 2018 Oct 19.	López-Domènech S	Mol Metab	2019	2018-03-11	PMC6323177		10.1016/j.molmet.2018.10.005
30383748	Dietary restriction improves intestinal cellular fitness to enhance gut barrier function and lifespan in D. melanogaster	Akagi K, Wilson KA, Katewa SD, Ortega M, Simons J, Hilsabeck TA, Kapuria S, Sharma A, Jasper H, Kapahi P.	PLoS Genet. 2018 Nov 1;14(11):e1007777. doi: 10.1371/journal.pgen.1007777. eCollection 2018 Nov.	Akagi K	PLoS Genet	2018	2018-02-11	PMC6233930		10.1371/journal.pgen.1007777
30376491	Life-threatening ketoacidosis in a lactating woman	Chew MS, Dalesjö L.	Eur J Anaesthesiol. 2018 Dec;35(12):984-986. doi: 10.1097/EJA.0000000000000856.	Chew MS	Eur J Anaesthesiol	2018	31/10/2018			10.1097/EJA.0000000000000856
30361718	[Tratamiento nutricional hiperproteico precirugía bariátrica en obesidad mórbida]	Pardo-Pacheco BR, Pérez-Cruz E, Nieto-Velázquez NG, Asbun-Bojalil J, Moreno-Eutimio MA.	Cir Cir. 2018;86(6):508-514. doi: 10.24875/CIRU.18000299.	Pardo-Pacheco BR	Cir Cir	2018	27/10/2018			10.24875/CIRU.18000299
30365103	Selenocysteine mimics the effect of dietary restriction on lifespan via SKN‑1 and retards age‑associated pathophysiological changes in Caenorhabditis elegans	Kim SH, Kim BK, Park SK.	Mol Med Rep. 2018 Dec;18(6):5389-5398. doi: 10.3892/mmr.2018.9590. Epub 2018 Oct 24.	Kim SH	Mol Med Rep	2018	27/10/2018	PMC6236260		10.3892/mmr.2018.9590
30358718	Caloric restriction reduces age at menopause: the effect of the 1944-1945 Dutch famine	Elias SG, van Noord PAH, Peeters PHM, Tonkelaar ID, Grobbee DE.	Menopause. 2018 Nov;25(11):1232-1237. doi: 10.1097/GME.0000000000001224.	Elias SG	Menopause	2018	26/10/2018			10.1097/GME.0000000000001224
30350446	Food addiction distinguishes an overweight phenotype that can be reversed by low calorie diet	Guzzardi MA, Garelli S, Agostini A, Filidei E, Fanelli F, Giorgetti A, Mezzullo M, Fucci S, Mazza R, Vicennati V, Iozzo P, Pagotto U.	Eur Eat Disord Rev. 2018 Nov;26(6):657-670. doi: 10.1002/erv.2652. Epub 2018 Oct 23.	Guzzardi MA	Eur Eat Disord Rev	2018	24/10/2018			10.1002/erv.2652
30344017	Neurocognitive and Hormonal Correlates of Voluntary Weight Loss in Humans	Neseliler S, Hu W, Larcher K, Zacchia M, Dadar M, Scala SG, Lamarche M, Zeighami Y, Stotland SC, Larocque M, Marliss EB, Dagher A.	Cell Metab. 2019 Jan 8;29(1):39-49.e4. doi: 10.1016/j.cmet.2018.09.024. Epub 2018 Oct 18.	Neseliler S	Cell Metab	2019	23/10/2018			10.1016/j.cmet.2018.09.024
30334314	Programmed longevity, youthspan, and juventology	Longo VD.	Aging Cell. 2019 Feb;18(1):e12843. doi: 10.1111/acel.12843. Epub 2018 Oct 17.	Longo VD	Aging Cell	2019	19/10/2018	PMC6351819		10.1111/acel.12843
30332646	Sarcosine Is Uniquely Modulated by Aging and Dietary Restriction in Rodents and Humans	Walters RO, Arias E, Diaz A, Burgos ES, Guan F, Tiano S, Mao K, Green CL, Qiu Y, Shah H, Wang D, Hudgins AD, Tabrizian T, Tosti V, Shechter D, Fontana L, Kurland IJ, Barzilai N, Cuervo AM, Promislow DEL, Huffman DM.	Cell Rep. 2018 Oct 16;25(3):663-676.e6. doi: 10.1016/j.celrep.2018.09.065.	Walters RO	Cell Rep	2018	18/10/2018	PMC6280974	NIHMS1510879	10.1016/j.celrep.2018.09.065
30328098	Meta-analysis of the influence of lifestyle changes for preoperative weight loss on surgical outcomes	Roman M, Monaghan A, Serraino GF, Miller D, Pathak S, Lai F, Zaccardi F, Ghanchi A, Khunti K, Davies MJ, Murphy GJ.	Br J Surg. 2019 Feb;106(3):181-189. doi: 10.1002/bjs.11001. Epub 2018 Oct 17.	Roman M	Br J Surg	2019	18/10/2018			10.1002/bjs.11001
30322392	Metabolomics identifies increases in the acylcarnitine profiles in the plasma of overweight subjects in response to mild weight loss: a randomized, controlled design study	Kang M, Yoo HJ, Kim M, Kim M, Lee JH.	Lipids Health Dis. 2018 Oct 15;17(1):237. doi: 10.1186/s12944-018-0887-1.	Kang M	Lipids Health Dis	2018	17/10/2018	PMC6190541		10.1186/s12944-018-0887-1
30289425	A randomized controlled trial of the impact of protein supplementation on leg lean mass and integrated muscle protein synthesis during inactivity and energy restriction in older persons	Oikawa SY, McGlory C, D'Souza LK, Morgan AK, Saddler NI, Baker SK, Parise G, Phillips SM.	Am J Clin Nutr. 2018 Nov 1;108(5):1060-1068. doi: 10.1093/ajcn/nqy193.	Oikawa SY	Am J Clin Nutr	2018	2018-06-10			10.1093/ajcn/nqy193
30281103	90th Anniversary Commentary: Caloric Restriction Effects on Aging	Le Couteur DG, Simpson SJ.	J Nutr. 2018 Oct 1;148(10):1656-1659. doi: 10.1093/jn/nxy146.	Le Couteur DG	J Nutr	2018	2018-04-10			10.1093/jn/nxy146
30273821	Peripheral interleukin-6 levels and working memory in non-obese adults: A post-hoc analysis from the CALERIE study	Trevizol AP, Brietzke E, Grigolon RB, Subramaniapillai M, McIntyre RS, Mansur RB.	Nutrition. 2019 Feb;58:18-22. doi: 10.1016/j.nut.2018.06.010. Epub 2018 Jul 12.	Trevizol AP	Nutrition	2019	2018-02-10			10.1016/j.nut.2018.06.010
30267671	The mitochondrial phosphatase PPTC7 orchestrates mitochondrial metabolism regulating coenzyme Q(10) biosynthesis	González-Mariscal I, Martin-Montalvo A, Vazquez-Fonseca L, Pomares-Viciana T, Sánchez-Cuesta A, Fernández-Ayala DJ, Navas P, Santos-Ocana C.	Biochim Biophys Acta Bioenerg. 2018 Nov;1859(11):1235-1248. doi: 10.1016/j.bbabio.2018.09.369. Epub 2018 Sep 26.	González-Mariscal I	Biochim Biophys Acta Bioenerg	2018	30/09/2018			10.1016/j.bbabio.2018.09.369
30259779	Prevention of Senescence in Vasculature Through Quiescence	Mendelsohn AR, Larrick JW.	Rejuvenation Res. 2018 Oct;21(5):477-481. doi: 10.1089/rej.2018.2138.	Mendelsohn AR	Rejuvenation Res	2018	28/09/2018			10.1089/rej.2018.2138
30258090	Exploring the effect of diet composition in calorie restriction interventions	Morris A.	Nat Rev Endocrinol. 2018 Nov;14(11):625. doi: 10.1038/s41574-018-0103-4.	Morris A	Nat Rev Endocrinol	2018	28/09/2018			10.1038/s41574-018-0103-4
30257983	Doctor Referral of Overweight People to Low Energy total diet replacement Treatment (DROPLET): pragmatic randomised controlled trial	Astbury NM, Aveyard P, Nickless A, Hood K, Corfield K, Lowe R, Jebb SA.	BMJ. 2018 Sep 26;362:k3760. doi: 10.1136/bmj.k3760.	Astbury NM	BMJ	2018	28/09/2018	PMC6156558		10.1136/bmj.k3760
30255376	The impact of restricted gestational weight gain by dietary intervention on fetal growth in women with gestational diabetes mellitus	Kurtzhals LL, Nørgaard SK, Secher AL, Nichum VL, Ronneby H, Tabor A, McIntyre HD, Damm P, Mathiesen ER.	Diabetologia. 2018 Dec;61(12):2528-2538. doi: 10.1007/s00125-018-4736-6. Epub 2018 Sep 25.	Kurtzhals LL	Diabetologia	2018	27/09/2018			10.1007/s00125-018-4736-6
30251088	Pre-operative Very Low Calorie Ketogenic Diet (VLCKD) vs. Very Low Calorie Diet (VLCD): Surgical Impact	Albanese A, Prevedello L, Markovich M, Busetto L, Vettor R, Foletto M.	Obes Surg. 2019 Jan;29(1):292-296. doi: 10.1007/s11695-018-3523-2.	Albanese A	Obes Surg	2019	26/09/2018			10.1007/s11695-018-3523-2
30251109	Effects on Cardiovascular Risk Scores and Vascular Age After Aerobic Exercise and Nutritional Intervention in Sedentary and Overweight/Obese Adults with Primary Hypertension: The EXERDIET-HTA Randomized Trial Study	Gorostegi-Anduaga I, Maldonado-Martín S, MartinezAguirre-Betolaza A, Corres P, Romaratezabala E, Whittaker AC, Francisco-Terreros S, Pérez-Asenjo J.	High Blood Press Cardiovasc Prev. 2018 Dec;25(4):361-368. doi: 10.1007/s40292-018-0281-0. Epub 2018 Sep 24.	Gorostegi-Anduaga I	High Blood Press Cardiovasc Prev	2018	26/09/2018			10.1007/s40292-018-0281-0
30246504	Calorie Restriction off the Menu for the Time Being?…	Moore A.	Bioessays. 2018 Oct;40(10):e1800170. doi: 10.1002/bies.201800170.	Moore A	Bioessays	2018	25/09/2018			10.1002/bies.201800170
30241426	Effect of A Very Low-Calorie Ketogenic Diet on Food and Alcohol Cravings, Physical and Sexual Activity, Sleep Disturbances, and Quality of Life in Obese Patients	Castro AI, Gomez-Arbelaez D, Crujeiras AB, Granero R, Aguera Z, Jimenez-Murcia S, Sajoux I, Lopez-Jaramillo P, Fernandez-Aranda F, Casanueva FF.	Nutrients. 2018 Sep 21;10(10):1348. doi: 10.3390/nu10101348.	Castro AI	Nutrients	2018	23/09/2018	PMC6213862		10.3390/nu10101348
30241565	Comparison of low calorie high protein and low calorie standard protein diet on waist circumference of adults with visceral obesity and weight cycling	Witjaksono F, Jutamulia J, Annisa NG, Prasetya SI, Nurwidya F.	BMC Res Notes. 2018 Sep 21;11(1):674. doi: 10.1186/s13104-018-3781-z.	Witjaksono F	BMC Res Notes	2018	23/09/2018	PMC6150981		10.1186/s13104-018-3781-z
30242237	Protein synthesis signaling in skeletal muscle is refractory to whey protein ingestion during a severe energy deficit evoked by prolonged exercise and caloric restriction	Martin-Rincon M, Perez-Suarez I, Pérez-López A, Ponce-González JG, Morales-Alamo D, de Pablos-Velasco P, Holmberg HC, Calbet JAL.	Int J Obes (Lond). 2019 Apr;43(4):872-882. doi: 10.1038/s41366-018-0174-2. Epub 2018 Sep 21.	Martin-Rincon M	Int J Obes (Lond)	2019	23/09/2018			10.1038/s41366-018-0174-2
30232744	Effects of Probiotic Yogurt on Serum Omentin-1, Adropin, and Nesfatin-1 Concentrations in Overweight and Obese Participants Under Low-Calorie Diet	Zarrati M, Raji Lahiji M, Salehi E, Yazdani B, Razmpoosh E, Shokouhi Shoormasti R, Shidfar F.	Probiotics Antimicrob Proteins. 2019 Dec;11(4):1202-1209. doi: 10.1007/s12602-018-9470-3.	Zarrati M	Probiotics Antimicrob Proteins	2019	21/09/2018			10.1007/s12602-018-9470-3
30228670	Hungering for Immortality	Eissenberg JC.	Mo Med. 2018 Jan-Feb;115(1):12-17.	Eissenberg JC	Mo Med	2018	20/09/2018	PMC6139805
30228761	Beating the Odds on Lifespan	Eissenberg JC.	Mo Med. 2018 Jul-Aug;115(4):337-338.	Eissenberg JC	Mo Med	2018	20/09/2018	PMC6140254
30219052	Effects of alternate day calorie restriction and exercise on cardio-metabolic risk factors in overweight and obese adults: an exploratory randomized controlled study	Oh M, Kim S, An KY, Min J, Yang HI, Lee J, Lee MK, Kim DI, Lee HS, Lee JW, Jeon JY.	BMC Public Health. 2018 Sep 15;18(1):1124. doi: 10.1186/s12889-018-6009-1.	Oh M	BMC Public Health	2018	17/09/2018	PMC6139127		10.1186/s12889-018-6009-1
30206335	Effects of intermittent versus continuous dieting on weight and body composition in obese and overweight people: a systematic review and meta-analysis of randomized controlled trials	Roman YM, Dominguez MC, Easow TM, Pasupuleti V, White CM, Hernandez AV.	Int J Obes (Lond). 2019 Oct;43(10):2017-2027. doi: 10.1038/s41366-018-0204-0. Epub 2018 Sep 11.	Roman YM	Int J Obes (Lond)	2019	13/09/2018			10.1038/s41366-018-0204-0
30205522	Added Sugars and Low- and No-Calorie Sweeteners in a Representative Sample of Food Products Consumed by the Spanish ANIBES Study Population	Samaniego-Vaesken ML, Ruiz E, Partearroyo T, Aranceta-Bartrina J, Gil Á, González-Gross M, Ortega RM, Serra-Majem L, Varela-Moreiras G.	Nutrients. 2018 Sep 7;10(9):1265. doi: 10.3390/nu10091265.	Samaniego-Vaesken ML	Nutrients	2018	13/09/2018	PMC6163363		10.3390/nu10091265
30205484	Low-Calorie Beverage Consumption, Diet Quality and Cardiometabolic Risk Factors in British Adults	Patel L, Alicandro G, La Vecchia C.	Nutrients. 2018 Sep 7;10(9):1261. doi: 10.3390/nu10091261.	Patel L	Nutrients	2018	13/09/2018	PMC6165431		10.3390/nu10091261
30201848	Therapeutic Lifestyle Changes Improve HDL Function by Inhibiting Myeloperoxidase-Mediated Oxidation in Patients With Metabolic Syndrome	Mathew AV, Li L, Byun J, Guo Y, Michailidis G, Jaiswal M, Chen YE, Pop-Busui R, Pennathur S.	Diabetes Care. 2018 Nov;41(11):2431-2437. doi: 10.2337/dc18-0049. Epub 2018 Sep 10.	Mathew AV	Diabetes Care	2018	2018-12-09	PMC6196832		10.2337/dc18-0049
30176893	Fecal microbiota and bile acid interactions with systemic and adipose tissue metabolism in diet-induced weight loss of obese postmenopausal women	Alemán JO, Bokulich NA, Swann JR, Walker JM, De Rosa JC, Battaglia T, Costabile A, Pechlivanis A, Liang Y, Breslow JL, Blaser MJ, Holt PR.	J Transl Med. 2018 Sep 3;16(1):244. doi: 10.1186/s12967-018-1619-z.	Alemán JO	J Transl Med	2018	2018-05-09	PMC6122649		10.1186/s12967-018-1619-z
30176834	Rationale and design of the Caloric Restriction and Exercise protection from Anthracycline Toxic Effects (CREATE) study: a 3-arm parallel group phase II randomized controlled trial in early breast cancer	Kirkham AA, Paterson DI, Prado CM, Mackey JR, Courneya KS, Pituskin E, Thompson RB.	BMC Cancer. 2018 Sep 3;18(1):864. doi: 10.1186/s12885-018-4778-7.	Kirkham AA	BMC Cancer	2018	2018-05-09	PMC6122558		10.1186/s12885-018-4778-7
30170304	Olive oil lessened fatty liver severity independent of cardiometabolic correction in patients with non-alcoholic fatty liver disease: A randomized clinical trial	Rezaei S, Akhlaghi M, Sasani MR, Barati Boldaji R.	Nutrition. 2019 Jan;57:154-161. doi: 10.1016/j.nut.2018.02.021. Epub 2018 Mar 23.	Rezaei S	Nutrition	2019	2018-01-09			10.1016/j.nut.2018.02.021
30153545	Approaches to restrictive feeding: Associations with child weight and eating behavior	Pesch MH, Appugliese DP, Miller AL, Rosenblum KL, Lumeng JC, Bauer KW.	Eat Behav. 2018 Dec;31:74-79. doi: 10.1016/j.eatbeh.2018.08.006. Epub 2018 Aug 23.	Pesch MH	Eat Behav	2018	29/08/2018	PMC6226350	NIHMS1505416	10.1016/j.eatbeh.2018.08.006
30145926	TFEB-driven endocytosis coordinates MTORC1 signaling and autophagy	Nnah IC, Wang B, Saqcena C, Weber GF, Bonder EM, Bagley D, De Cegli R, Napolitano G, Medina DL, Ballabio A, Dobrowolski R.	Autophagy. 2019 Jan;15(1):151-164. doi: 10.1080/15548627.2018.1511504. Epub 2018 Sep 10.	Nnah IC	Autophagy	2019	28/08/2018	PMC6287686		10.1080/15548627.2018.1511504
30143305	Willing to go the extra mile: Prospective evaluation of an intensified non-surgical treatment for patients with morbid obesity	Weimann A, Fischer M, Oberänder N, Prodehl G, Weber N, Andrä M, Krug J, Wallstabe I, Schiefke I, Bischoff SC.	Clin Nutr. 2019 Aug;38(4):1773-1781. doi: 10.1016/j.clnu.2018.07.027. Epub 2018 Aug 1.	Weimann A	Clin Nutr	2019	26/08/2018			10.1016/j.clnu.2018.07.027
30142886	Randomized Trial of a High Protein, Partial Meal Replacement Program with or without Alternate Day Fasting: Similar Effects on Weight Loss, Retention Status, Nutritional, Metabolic, and Behavioral Outcomes	Bowen J, Brindal E, James-Martin G, Noakes M.	Nutrients. 2018 Aug 23;10(9):1145. doi: 10.3390/nu10091145.	Bowen J	Nutrients	2018	26/08/2018	PMC6165084		10.3390/nu10091145
30137218	Effect of Intentional Weight Loss on Mortality Biomarkers in Older Adults With Obesity	Shaver LN, Beavers DP, Kiel J, Kritchevsky SB, Beavers KM.	J Gerontol A Biol Sci Med Sci. 2019 Jul 12;74(8):1303-1309. doi: 10.1093/gerona/gly192.	Shaver LN	J Gerontol A Biol Sci Med Sci	2019	24/08/2018	PMC7179512		10.1093/gerona/gly192
30135314	The circulating metabolome of human starvation	Steinhauser ML, Olenchock BA, O'Keefe J, Lun M, Pierce KA, Lee H, Pantano L, Klibanski A, Shulman GI, Clish CB, Fazeli PK.	JCI Insight. 2018 Aug 23;3(16):e121434. doi: 10.1172/jci.insight.121434. eCollection 2018 Aug 23.	Steinhauser ML	JCI Insight	2018	24/08/2018	PMC6141167		10.1172/jci.insight.121434
30137542	Role of wnt5a in Metabolic Inflammation in Humans	Relling I, Akcay G, Fangmann D, Knappe C, Schulte DM, Hartmann K, Müller N, Türk K, Dempfle A, Franke A, Schreiber S, Laudes M.	J Clin Endocrinol Metab. 2018 Nov 1;103(11):4253-4264. doi: 10.1210/jc.2018-01007.	Relling I	J Clin Endocrinol Metab	2018	24/08/2018			10.1210/jc.2018-01007
30128643	Effectiveness, Compliance, and Acceptability of Preoperative Weight Loss with a Liquid Very Low-Calorie Diet Before Bariatric Surgery in Real Practice	Yolsuriyanwong K, Thanavachirasin K, Sasso K, Zuro L, Bartfield J, Marcotte E, Chand B.	Obes Surg. 2019 Jan;29(1):54-60. doi: 10.1007/s11695-018-3444-0.	Yolsuriyanwong K	Obes Surg	2019	22/08/2018			10.1007/s11695-018-3444-0
30123582	Impact of Experimentally Induced Cognitive Dietary Restraint on Eating Behavior Traits, Appetite Sensations, and Markers of Stress during Energy Restriction in Overweight/Obese Women	Morin I, Bégin C, Maltais-Giguère J, Bédard A, Tchernof A, Lemieux S.	J Obes. 2018 Jun 25;2018:4259389. doi: 10.1155/2018/4259389. eCollection 2018.	Morin I	J Obes	2018	21/08/2018	PMC6079586		10.1155/2018/4259389
30121854	The Efficacy of Energy-Restricted Diets in Achieving Preoperative Weight Loss for Bariatric Patients: a Systematic Review	Naseer F, Shabbir A, Livingstone B, Price R, Syn NL, Flannery O.	Obes Surg. 2018 Nov;28(11):3678-3690. doi: 10.1007/s11695-018-3451-1.	Naseer F	Obes Surg	2018	20/08/2018			10.1007/s11695-018-3451-1
30107476	Caloric restriction inhibits mammary tumorigenesis in MMTV-ErbB2 transgenic mice through the suppression of ER and ErbB2 pathways and inhibition of epithelial cell stemness in premalignant mammary tissues	Ma Z, Parris AB, Howard EW, Shi Y, Yang S, Jiang Y, Kong L, Yang X.	Carcinogenesis. 2018 Oct 8;39(10):1264-1273. doi: 10.1093/carcin/bgy096.	Ma Z	Carcinogenesis	2018	15/08/2018	PMC6175030		10.1093/carcin/bgy096
30088336	Men and women respond differently to rapid weight loss: Metabolic outcomes of a multi-centre intervention study after a low-energy diet in 2500 overweight, individuals with pre-diabetes (PREVIEW)	Christensen P, Meinert Larsen T, Westerterp-Plantenga M, Macdonald I, Martinez JA, Handjiev S, Poppitt S, Hansen S, Ritz C, Astrup A, Pastor-Sanz L, Sandø-Pedersen F, Pietiläinen KH, Sundvall J, Drummen M, Taylor MA, Navas-Carretero S, Handjieva-Darlenska T, Brodie S, Silvestre MP, Huttunen-Lenz M, Brand-Miller J, Fogelholm M, Raben A.	Diabetes Obes Metab. 2018 Dec;20(12):2840-2851. doi: 10.1111/dom.13466. Epub 2018 Aug 7.	Christensen P	Diabetes Obes Metab	2018	2018-09-08	PMC6282840		10.1111/dom.13466
30078554	Remission of Human Type 2 Diabetes Requires Decrease in Liver and Pancreas Fat Content but Is Dependent upon Capacity for β Cell Recovery	Taylor R, Al-Mrabeh A, Zhyzhneuskaya S, Peters C, Barnes AC, Aribisala BS, Hollingsworth KG, Mathers JC, Sattar N, Lean MEJ.	Cell Metab. 2018 Oct 2;28(4):547-556.e3. doi: 10.1016/j.cmet.2018.07.003. Epub 2018 Aug 2.	Taylor R	Cell Metab	2018	2018-07-08			10.1016/j.cmet.2018.07.003
30055077	Cost-Effectiveness of Diet and Exercise for Overweight and Obese Patients With Knee Osteoarthritis	Losina E, Smith KC, Paltiel AD, Collins JE, Suter LG, Hunter DJ, Katz JN, Messier SP.	Arthritis Care Res (Hoboken). 2019 Jul;71(7):855-864. doi: 10.1002/acr.23716.	Losina E	Arthritis Care Res (Hoboken)	2019	29/07/2018	PMC6349519	NIHMS983199	10.1002/acr.23716
30052705	Reply to DM Thomas et al	Guo J, Brager DC, Hall KD.	Am J Clin Nutr. 2018 Oct 1;108(4):901-902. doi: 10.1093/ajcn/nqy154.	Guo J	Am J Clin Nutr	2018	28/07/2018	PMC6455029		10.1093/ajcn/nqy154
30052315	A Moderate Interleukin-6 Reduction, Not a Moderate Weight Reduction, Improves the Serum Iron Status in Diet-Induced Weight Loss with Fish Oil Supplementation	Huang SY, Sabrina N, Chien YW, Chen YC, Lin SH, Chang JS.	Mol Nutr Food Res. 2018 Oct;62(20):e1800243. doi: 10.1002/mnfr.201800243. Epub 2018 Aug 26.	Huang SY	Mol Nutr Food Res	2018	28/07/2018			10.1002/mnfr.201800243
30046988	Intermittent Fasting (Alternate Day Fasting) in Healthy, Non-obese Adults: Protocol for a Cohort Trial with an Embedded Randomized Controlled Pilot Trial	Tripolt NJ, Stekovic S, Aberer F, Url J, Pferschy PN, Schröder S, Verheyen N, Schmidt A, Kolesnik E, Narath SH, Riedl R, Obermayer-Pietsch B, Pieber TR, Madeo F, Sourij H.	Adv Ther. 2018 Aug;35(8):1265-1283. doi: 10.1007/s12325-018-0746-5. Epub 2018 Jul 25.	Tripolt NJ	Adv Ther	2018	27/07/2018	PMC6096974		10.1007/s12325-018-0746-5
30043560	Concomitant assessment of DNA oxidation and bone resorption over a rapid body mass reduction period in female judokas	Yasuda N, Yano T.	J Biol Regul Homeost Agents. 2018 Jul-Aug;32(4):781-790.	Yasuda N	J Biol Regul Homeost Agents	2018	26/07/2018
30040571	Forced Calorie Restrictions in the Clinical Setting	Anderson-Shaw L.	Am J Bioeth. 2018 Jul;18(7):83-85. doi: 10.1080/15265161.2018.1478040.	Anderson-Shaw L	Am J Bioeth	2018	25/07/2018			10.1080/15265161.2018.1478040
30037068	Gene Expression of Sirtuin-1 and Endogenous Secretory Receptor for Advanced Glycation End Products in Healthy and Slightly Overweight Subjects after Caloric Restriction and Resveratrol Administration	Roggerio A, Strunz CMC, Pacanaro AP, Leal DP, Takada JY, Avakian SD, Mansur AP.	Nutrients. 2018 Jul 21;10(7):937. doi: 10.3390/nu10070937.	Roggerio A	Nutrients	2018	25/07/2018	PMC6073749		10.3390/nu10070937
30038280	Pathogenic tau-induced piRNA depletion promotes neuronal death through transposable element dysregulation in neurodegenerative tauopathies	Sun W, Samimi H, Gamez M, Zare H, Frost B.	Nat Neurosci. 2018 Aug;21(8):1038-1048. doi: 10.1038/s41593-018-0194-1. Epub 2018 Jul 23.	Sun W	Nat Neurosci	2018	25/07/2018	PMC6095477	NIHMS976583	10.1038/s41593-018-0194-1
29982294	Effects of Caloric Restriction on Cardiorespiratory Fitness, Fatigue, and Disability Responses to Aerobic Exercise in Older Adults With Obesity: A Randomized Controlled Trial	Nicklas BJ, Brinkley TE, Houston DK, Lyles MF, Hugenschmidt CE, Beavers KM, Leng X.	J Gerontol A Biol Sci Med Sci. 2019 Jun 18;74(7):1084-1090. doi: 10.1093/gerona/gly159.	Nicklas BJ	J Gerontol A Biol Sci Med Sci	2019	2018-09-07	PMC6580693		10.1093/gerona/gly159
29979853	[In process]	Reisdorf S.	Med Monatsschr Pharm. 2017 Jun;40(6):269-70.	Reisdorf S	Med Monatsschr Pharm	2017	2018-07-07
29967522	The lifelong impact of fetal growth restriction on cardiac development	Masoumy EP, Sawyer AA, Sharma S, Patel JA, Gordon PMK, Regnault TRH, Matushewski B, Weintraub NL, Richardson B, Thompson JA, Stansfield BK.	Pediatr Res. 2018 Oct;84(4):537-544. doi: 10.1038/s41390-018-0069-x. Epub 2018 Jun 2.	Masoumy EP	Pediatr Res	2018	2018-04-07	PMC6265071	NIHMS970021	10.1038/s41390-018-0069-x
29948221	An integrated transcriptomic and epigenomic analysis identifies CD44 gene as a potential biomarker for weight loss within an energy-restricted program	Samblas M, Mansego ML, Zulet MA, Milagro FI, Martinez JA.	Eur J Nutr. 2019 Aug;58(5):1971-1980. doi: 10.1007/s00394-018-1750-x. Epub 2018 Jun 14.	Samblas M	Eur J Nutr	2019	28/06/2018			10.1007/s00394-018-1750-x
29948740	Food as Medicine for Secondary Prevention of Cardiovascular Events Following an Acute Coronary Syndrome	Paruchuri V, Gaztanaga J, Rambhujun V, Smith R, Farkouh ME.	Cardiovasc Drugs Ther. 2018 Dec;32(6):611-616. doi: 10.1007/s10557-018-6798-6.	Paruchuri V	Cardiovasc Drugs Ther	2018	28/06/2018			10.1007/s10557-018-6798-6
29929449	Aspirin-another caloric-restriction mimetic	Pietrocola F, Castoldi F, Maiuri MC, Kroemer G.	Autophagy. 2018;14(7):1162-1163. doi: 10.1080/15548627.2018.1454810. Epub 2018 Jul 18.	Pietrocola F	Autophagy	2018	23/06/2018	PMC6103658		10.1080/15548627.2018.1454810
29933113	Bone metabolic responses to low energy availability achieved by diet or exercise in active eumenorrheic women	Papageorgiou M, Martin D, Colgan H, Cooper S, Greeves JP, Tang JCY, Fraser WD, Elliott-Sale KJ, Sale C.	Bone. 2018 Sep;114:181-188. doi: 10.1016/j.bone.2018.06.016. Epub 2018 Jun 19.	Papageorgiou M	Bone	2018	23/06/2018			10.1016/j.bone.2018.06.016
29926996	For me it's about not feeling like I'm on a diet': a thematic analysis of women's experiences of an intermittent energy restricted diet to reduce breast cancer risk	Donnelly LS, Shaw RL, Pegington M, Armitage CJ, Evans DG, Howell A, Harvie MN.	J Hum Nutr Diet. 2018 Dec;31(6):773-780. doi: 10.1111/jhn.12571. Epub 2018 Jun 21.	Donnelly LS	J Hum Nutr Diet	2018	22/06/2018			10.1111/jhn.12571
29925393	Beneficial changes on plasma apolipoproteins A and B, high density lipoproteins and oxidized low density lipoproteins in obese women after bariatric surgery: comparison between gastric bypass and sleeve gastrectomy	Gómez-Martin JM, Balsa JA, Aracil E, Cuadrado-Ayuso M, Rosillo M, De la Peña G, Lasunción MA, Escobar-Morreale HF, Botella-Carretero JI.	Lipids Health Dis. 2018 Jun 20;17(1):145. doi: 10.1186/s12944-018-0794-5.	Gómez-Martin JM	Lipids Health Dis	2018	22/06/2018	PMC6011580		10.1186/s12944-018-0794-5
29913463	Diet, drugs, devices, and surgery for weight management		Med Lett Drugs Ther. 2018 Jun 4;60(1548):91-98.		Med Lett Drugs Ther	2018	19/06/2018
29912618	Caloric restriction counteracts chemotherapy-induced inflammation and increases response to therapy in a triple negative breast cancer model	Simone BA, Palagani A, Strickland K, Ko K, Jin L, Lim MK, Dan TD, Sarich M, Monti DA, Cristofanilli M, Simone NL.	Cell Cycle. 2018;17(13):1536-1544. doi: 10.1080/15384101.2018.1471314. Epub 2018 Aug 6.	Simone BA	Cell Cycle	2018	19/06/2018	PMC6133339		10.1080/15384101.2018.1471314
29904126	Effect of testosterone treatment on bone remodelling markers and mineral density in obese dieting men in a randomized clinical trial	Ng Tang Fui M, Hoermann R, Nolan B, Clarke M, Zajac JD, Grossmann M.	Sci Rep. 2018 Jun 14;8(1):9099. doi: 10.1038/s41598-018-27481-3.	Ng Tang Fui M	Sci Rep	2018	16/06/2018	PMC6002535		10.1038/s41598-018-27481-3
29902503	Naïve models of dietary splurges: Beliefs about caloric compensation and weight change following non-habitual overconsumption	O'Brien JD, Kahn RM, Zenko Z, Fernandez JR, Ariely D.	Appetite. 2018 Sep 1;128:321-332. doi: 10.1016/j.appet.2018.06.016. Epub 2018 Jun 11.	O'Brien JD	Appetite	2018	15/06/2018			10.1016/j.appet.2018.06.016
29897135	Do-It-Yourself Calorie Restriction: The Risks of Simplistically Translating Findings in Animal Models to Humans	Le Bourg E, Redman LM.	Bioessays. 2018 Sep;40(9):e1800087. doi: 10.1002/bies.201800087. Epub 2018 Jun 13.	Le Bourg E	Bioessays	2018	14/06/2018			10.1002/bies.201800087
29874838	Methyl 3,4-Dihydroxybenzoate Enhances Resistance to Oxidative Stressors and Lifespan in C. elegans Partially via daf-2/daf-16	Mi XN, Wang LF, Hu Y, Pan JP, Xin YR, Wang JH, Geng HJ, Hu SH, Gao Q, Luo HM.	Int J Mol Sci. 2018 Jun 5;19(6):1670. doi: 10.3390/ijms19061670.	Mi XN	Int J Mol Sci	2018	2018-08-06	PMC6032309		10.3390/ijms19061670
29870675	Impact of a one-year lifestyle modification program on cholesterol efflux capacities in men with abdominal obesity and dyslipidemia	Boyer M, Mitchell PL, Poirier P, Alméras N, Tremblay A, Bergeron J, Després JP, Arsenault BJ.	Am J Physiol Endocrinol Metab. 2018 Oct 1;315(4):E460-E468. doi: 10.1152/ajpendo.00127.2018. Epub 2018 Jun 5.	Boyer M	Am J Physiol Endocrinol Metab	2018	2018-06-06			10.1152/ajpendo.00127.2018
29865281	Combining Short-Term Interval Training with Caloric Restriction Improves ß-Cell Function in Obese Adults	Francois ME, Gilbertson NM, Eichner NZM, Heiston EM, Fabris C, Breton M, Mehaffey JH, Hassinger T, Hallowell PT, Malin SK.	Nutrients. 2018 Jun 3;10(6):717. doi: 10.3390/nu10060717.	Francois ME	Nutrients	2018	2018-06-06	PMC6024769		10.3390/nu10060717
29860630	Effects of 2-day calorie restriction on cardiovascular autonomic response, mood, and cognitive and motor functions in obese young adult women	Solianik R, Sujeta A, Čekanauskaitė A.	Exp Brain Res. 2018 Aug;236(8):2299-2308. doi: 10.1007/s00221-018-5305-4. Epub 2018 Jun 2.	Solianik R	Exp Brain Res	2018	2018-04-06			10.1007/s00221-018-5305-4
29858367	Longitudinal Changes in Cholesterol Efflux Capacities in Patients With Coronary Artery Disease Undergoing Lifestyle Modification Therapy	Boyer M, Lévesque V, Poirier P, Marette A, Mitchell PL, Mora S, Mathieu P, Després JP, Larose É, Arsenault BJ.	J Am Heart Assoc. 2018 Jun 1;7(11):e008681. doi: 10.1161/JAHA.118.008681.	Boyer M	J Am Heart Assoc	2018	2018-03-06	PMC6015361		10.1161/JAHA.118.008681
29850450	The Effects of Extra Virgin Olive Oil on Alanine Aminotransferase, Aspartate Aminotransferase, and Ultrasonographic Indices of Hepatic Steatosis in Nonalcoholic Fatty Liver Disease Patients Undergoing Low Calorie Diet	Shidfar F, Bahrololumi SS, Doaei S, Mohammadzadeh A, Gholamalizadeh M, Mohammadimanesh A.	Can J Gastroenterol Hepatol. 2018 Apr 17;2018:1053710. doi: 10.1155/2018/1053710. eCollection 2018.	Shidfar F	Can J Gastroenterol Hepatol	2018	2018-01-06	PMC5932499		10.1155/2018/1053710
29844102	Impact of body weight, low energy diet and gastric bypass on drug bioavailability, cardiovascular risk factors and metabolic biomarkers: protocol for an open, non-randomised, three-armed single centre study (COCKTAIL)	Hjelmesæth J, Åsberg A, Andersson S, Sandbu R, Robertsen I, Johnson LK, Angeles PC, Hertel JK, Skovlund E, Heijer M, Ek AL, Krogstad V, Karlsen TI, Christensen H, Andersson TB, Karlsson C.	BMJ Open. 2018 May 29;8(5):e021878. doi: 10.1136/bmjopen-2018-021878.	Hjelmesæth J	BMJ Open	2018	31/05/2018	PMC5988193		10.1136/bmjopen-2018-021878
29846553	Impact of a Multidomain Intensive Lifestyle Intervention on Complaints About Memory, Problem-Solving, and Decision-Making Abilities: The Action for Health in Diabetes Randomized Controlled Clinical Trial	Espeland MA, Dutton GR, Neiberg RH, Carmichael O, Hayden KM, Johnson KC, Jeffery RW, Baker LD, Cook DR, Kitzman DW, Rapp SR; Action for Health in Diabetes (Look AHEAD) Research Group.	J Gerontol A Biol Sci Med Sci. 2018 Oct 8;73(11):1560-1567. doi: 10.1093/gerona/gly124.	Espeland MA	J Gerontol A Biol Sci Med Sci	2018	31/05/2018	PMC6175017		10.1093/gerona/gly124
29804201	Calorie restriction induces reversible lymphopenia and lymphoid organ atrophy due to cell redistribution	Contreras NA, Fontana L, Tosti V, Nikolich-Žugich J.	Geroscience. 2018 Jun;40(3):279-291. doi: 10.1007/s11357-018-0022-2. Epub 2018 May 26.	Contreras NA	Geroscience	2018	28/05/2018	PMC6060198		10.1007/s11357-018-0022-2
29791782	Obesity leads to impairments in the morphology and organization of human skeletal muscle lipid droplets and mitochondrial networks, which are resolved with gastric bypass surgery-induced improvements in insulin sensitivity	Kristensen MD, Petersen SM, Møller KE, Lund MT, Hansen M, Hansen CN, Courraud J, Helge JW, Dela F, Prats C.	Acta Physiol (Oxf). 2018 Dec;224(4):e13100. doi: 10.1111/apha.13100. Epub 2018 Jun 10.	Kristensen MD	Acta Physiol (Oxf)	2018	24/05/2018			10.1111/apha.13100
29785243	Oxidative Stress in Aging Brain: Nutritional and Pharmacological Interventions for Neurodegenerative Disorders	Giudetti AM, Salzet M, Cassano T.	Oxid Med Cell Longev. 2018 Feb 11;2018:3416028. doi: 10.1155/2018/3416028. eCollection 2018.	Giudetti AM	Oxid Med Cell Longev	2018	23/05/2018	PMC5896401		10.1155/2018/3416028
29784059	Diabetes Intervention Accentuating Diet and Enhancing Metabolism (DIADEM-I): a randomised controlled trial to examine the impact of an intensive lifestyle intervention consisting of a low-energy diet and physical activity on body weight and metabolism in early type 2 diabetes mellitus: study protocol for a randomized controlled trial	Taheri S, Chagoury O, Zaghloul H, Elhadad S, Ahmed SH, Omar O, Payra S, Ahmed S, El Khatib N, Amona RA, El Nahas K, Bolton M, Chaar H, Suleiman N, Jayyousi A, Zirie M, Janahi I, Elhag W, Alnaama A, Zainel A, Hassan D, Cable T, Charlson M, Wells M, Al-Hamaq A, Al-Abdulla S, Abou-Samra AB.	Trials. 2018 May 21;19(1):284. doi: 10.1186/s13063-018-2660-1.	Taheri S	Trials	2018	23/05/2018	PMC5963071		10.1186/s13063-018-2660-1
29781380	Finally, a Regimen to Extend Human Life Expectancy	Larrick JW, Mendelsohn AR.	Rejuvenation Res. 2018 Jun;21(3):278-282. doi: 10.1089/rej.2018.2088.	Larrick JW	Rejuvenation Res	2018	22/05/2018			10.1089/rej.2018.2088
29778565	Effect of intermittent versus continuous energy restriction on weight loss, maintenance and cardiometabolic risk: A randomized 1-year trial	Sundfør TM, Svendsen M, Tonstad S.	Nutr Metab Cardiovasc Dis. 2018 Jul;28(7):698-706. doi: 10.1016/j.numecd.2018.03.009. Epub 2018 Mar 29.	Sundfør TM	Nutr Metab Cardiovasc Dis	2018	21/05/2018			10.1016/j.numecd.2018.03.009
29777241	Acute effect of equicaloric meals varying in glycemic index and glycemic load on arterial stiffness and glycemia in healthy adults: a randomized crossover trial	Zurbau A, Jenkins AL, Jovanovski E, Au-Yeung F, Bateman EA, Brissette C, Wolever TMS, Hanna A, Vuksan V.	Eur J Clin Nutr. 2019 Jan;73(1):79-85. doi: 10.1038/s41430-018-0182-2. Epub 2018 May 17.	Zurbau A	Eur J Clin Nutr	2019	20/05/2018			10.1038/s41430-018-0182-2
29777235	Response of skeletal muscle UCP2-expression during metabolic adaptation to caloric restriction	Heinitz S, Piaggi P, Yang S, Bonfiglio S, Steel J, Krakoff J, Votruba SB.	Int J Obes (Lond). 2018 Jun;42(5):974-984. doi: 10.1038/s41366-018-0085-2. Epub 2018 May 17.	Heinitz S	Int J Obes (Lond)	2018	20/05/2018			10.1038/s41366-018-0085-2
29767350	Inverse relationship between changes of maximal aerobic capacity and changes in walking economy after weight loss	Borges JH, Carter SJ, Singh H, Hunter GR.	Eur J Appl Physiol. 2018 Aug;118(8):1573-1578. doi: 10.1007/s00421-018-3888-x. Epub 2018 May 16.	Borges JH	Eur J Appl Physiol	2018	17/05/2018	PMC6239988	NIHMS968523	10.1007/s00421-018-3888-x
29766165	Effects of EPA and lipoic acid supplementation on circulating FGF21 and the fatty acid profile in overweight/obese women following a hypocaloric diet	Escoté X , Félix-Soriano E , Gayoso L , Huerta AE , Alvarado MA , Ansorena D , Astiasarán I , Martínez JA , Moreno-Aliaga MJ .	Food Funct. 2018 May 23;9(5):3028-3036. doi: 10.1039/c8fo00355f.	Escoté X	Food Funct	2018	17/05/2018			10.1039/c8fo00355f
29759101	Effect of the Health Tourism weight loss programme on body composition and health outcomes in healthy and excess-weight adults	Sagayama H, Shizuma K, Toguchi M, Mizuhara H, Machida Y, Yamada Y, Ebine N, Higaki Y, Tanaka H.	Br J Nutr. 2018 May;119(10):1133-1141. doi: 10.1017/S0007114518000582.	Sagayama H	Br J Nutr	2018	16/05/2018			10.1017/S0007114518000582
29753994	Effect of intermittent vs. daily calorie restriction on changes in weight and patient-reported outcomes in people with multiple sclerosis	Fitzgerald KC, Vizthum D, Henry-Barron B, Schweitzer A, Cassard SD, Kossoff E, Hartman AL, Kapogiannis D, Sullivan P, Baer DJ, Mattson MP, Appel LJ, Mowry EM.	Mult Scler Relat Disord. 2018 Jul;23:33-39. doi: 10.1016/j.msard.2018.05.002. Epub 2018 May 5.	Fitzgerald KC	Mult Scler Relat Disord	2018	14/05/2018	PMC6107078	NIHMS984686	10.1016/j.msard.2018.05.002
29745911	CLINICAL CASE OF TYPE 2 DIABETES REMISSION	Mustafayeva S, Mirzazada V.	Georgian Med News. 2018 Apr;(277):35-39.	Mustafayeva S	Georgian Med News	2018	2018-11-05
29747087	HDL cholesterol efflux capacity and cholesteryl ester transfer are associated with body mass, but are not changed by diet-induced weight loss: A randomized trial in abdominally obese men	Talbot CPJ, Plat J, Joris PJ, Konings M, Kusters YHAM, Schalkwijk CG, Ritsch A, Mensink RP.	Atherosclerosis. 2018 Jul;274:23-28. doi: 10.1016/j.atherosclerosis.2018.04.029. Epub 2018 Apr 28.	Talbot CPJ	Atherosclerosis	2018	2018-11-05			10.1016/j.atherosclerosis.2018.04.029
29737494	The effect of moderate weight loss, with or without (1, 3)(1, 6)-β-glucan addition, on subcutaneous adipose tissue inflammatory gene expression in young subjects with uncomplicated obesity	Strączkowski M, Nikołajuk A, Majewski R, Filarski R, Stefanowicz M, Matulewicz N, Karczewska-Kupczewska M.	Endocrine. 2018 Aug;61(2):275-284. doi: 10.1007/s12020-018-1619-z. Epub 2018 May 8.	Strączkowski M	Endocrine	2018	2018-09-05	PMC6061191		10.1007/s12020-018-1619-z
29724529	The effect of daily fortified yogurt consumption on weight loss in adults with metabolic syndrome: A 10-week randomized controlled trial	Mohammadi-Sartang M, Bellissimo N, Totosy de Zepetnek JO, Brett NR, Mazloomi SM, Fararouie M, Bedeltavana A, Famouri M, Mazloom Z.	Nutr Metab Cardiovasc Dis. 2018 Jun;28(6):565-574. doi: 10.1016/j.numecd.2018.03.001. Epub 2018 Mar 10.	Mohammadi-Sartang M	Nutr Metab Cardiovasc Dis	2018	2018-05-05			10.1016/j.numecd.2018.03.001
29720572	Endospanin-2 enhances skeletal muscle energy metabolism and running endurance capacity	Lancel S, Hesselink MK, Woldt E, Rouillé Y, Dorchies E, Delhaye S, Duhem C, Thorel Q, Mayeuf-Louchart A, Pourcet B, Montel V, Schaart G, Beton N, Picquet F, Briand O, Salles JP, Duez H, Schrauwen P, Bastide B, Bailleul B, Staels B, Sebti Y.	JCI Insight. 2018 May 3;3(9):e98081. doi: 10.1172/jci.insight.98081.	Lancel S	JCI Insight	2018	2018-04-05	PMC6012521		10.1172/jci.insight.98081
29708498	Transcriptional profiling identifies strain-specific effects of caloric restriction and opposite responses in human and mouse white adipose tissue	Swindell WR, List EO, Berryman DE, Kopchick JJ.	Aging (Albany NY). 2018 Apr 29;10(4):701-746. doi: 10.18632/aging.101424.	Swindell WR	Aging (Albany NY)	2018	2018-01-05	PMC5940131		10.18632/aging.101424
29701639	Energy Deficit Required for Rapid Weight Loss in Elite Collegiate Wrestlers	Kondo E, Sagayama H, Yamada Y, Shiose K, Osawa T, Motonaga K, Ouchi S, Kamei A, Nakajima K, Higaki Y, Tanaka H, Takahashi H, Okamura K.	Nutrients. 2018 Apr 26;10(5):536. doi: 10.3390/nu10050536.	Kondo E	Nutrients	2018	28/04/2018	PMC5986416		10.3390/nu10050536
29690917	Health consequences for mother and baby of substantial pre-conception weight loss in obese women: study protocol for a randomized controlled trial	Price S, Nankervis A, Permezel M, Prendergast L, Sumithran P, Proietto J.	Trials. 2018 Apr 24;19(1):248. doi: 10.1186/s13063-018-2615-6.	Price S	Trials	2018	26/04/2018	PMC5926510		10.1186/s13063-018-2615-6
29678127	A health economic model to assess the cost-effectiveness of OPTIFAST for the treatment of obesity in the United States	Nuijten M, Marczewska A, Araujo Torres K, Rasouli B, Perugini M.	J Med Econ. 2018 Sep;21(9):835-844. doi: 10.1080/13696998.2018.1468334. Epub 2018 May 18.	Nuijten M	J Med Econ	2018	22/04/2018			10.1080/13696998.2018.1468334
29679690	Reduced body weight or increased muscle quality: Which is more important for improving physical function following exercise and weight loss in overweight and obese older women?	Straight CR, Berg AC, Reed RA, Johnson MA, Evans EM.	Exp Gerontol. 2018 Jul 15;108:159-165. doi: 10.1016/j.exger.2018.04.011. Epub 2018 Apr 19.	Straight CR	Exp Gerontol	2018	22/04/2018			10.1016/j.exger.2018.04.011
29676530	Short- and Long-Term Changes in Health-Related Quality of Life with Weight Loss: Results from a Randomized Controlled Trial	Pearl RL, Wadden TA, Tronieri JS, Berkowitz RI, Chao AM, Alamuddin N, Leonard SM, Carvajal R, Bakizada ZM, Pinkasavage E, Gruber KA, Walsh OA, Alfaris N.	Obesity (Silver Spring). 2018 Jun;26(6):985-991. doi: 10.1002/oby.22187. Epub 2018 Apr 20.	Pearl RL	Obesity (Silver Spring)	2018	21/04/2018	PMC5970047	NIHMS951389	10.1002/oby.22187
29664459	Multiple sclerosis and myasthenia gravis following severe weight loss	Alanazy MH, Alomar MA, Aljafen BN, Muayqil TA.	Neurosciences (Riyadh). 2018 Apr;23(2):158-161. doi: 10.17712/nsj.2018.2.20170343.	Alanazy MH	Neurosciences (Riyadh)	2018	18/04/2018	PMC8015450		10.17712/nsj.2018.2.20170343
29651021	Sustained caloric restriction in health	Leong I.	Nat Rev Endocrinol. 2018 Jun;14(6):322. doi: 10.1038/s41574-018-0008-2.	Leong I	Nat Rev Endocrinol	2018	14/04/2018			10.1038/s41574-018-0008-2
29649106	MOSH Syndrome (Male Obesity Secondary Hypogonadism): Clinical Assessment and Possible Therapeutic Approaches	De Lorenzo A, Noce A, Moriconi E, Rampello T, Marrone G, Di Daniele N, Rovella V.	Nutrients. 2018 Apr 12;10(4):474. doi: 10.3390/nu10040474.	De Lorenzo A	Nutrients	2018	13/04/2018	PMC5946259		10.3390/nu10040474
29635495	Simulating long-term human weight-loss dynamics in response to calorie restriction	Guo J, Brager DC, Hall KD.	Am J Clin Nutr. 2018 Apr 1;107(4):558-565. doi: 10.1093/ajcn/nqx080.	Guo J	Am J Clin Nutr	2018	2018-11-04	PMC6248630		10.1093/ajcn/nqx080
29618011	Effects of Diazoxide-Mediated Insulin Suppression on Glucose and Lipid Metabolism in Nondiabetic Obese Men	Loves S, van Groningen L, Filius M, Mekking M, Brandon T, Tack CJ, Hermus A, de Boer H.	J Clin Endocrinol Metab. 2018 Jun 1;103(6):2346-2353. doi: 10.1210/jc.2018-00161.	Loves S	J Clin Endocrinol Metab	2018	2018-05-04			10.1210/jc.2018-00161
29599478	Chronic nicotinamide riboside supplementation is well-tolerated and elevates NAD(+) in healthy middle-aged and older adults	Martens CR, Denman BA, Mazzo MR, Armstrong ML, Reisdorph N, McQueen MB, Chonchol M, Seals DR.	Nat Commun. 2018 Mar 29;9(1):1286. doi: 10.1038/s41467-018-03421-7.	Martens CR	Nat Commun	2018	31/03/2018	PMC5876407		10.1038/s41467-018-03421-7
29576535	Metabolic Slowing and Reduced Oxidative Damage with Sustained Caloric Restriction Support the Rate of Living and Oxidative Damage Theories of Aging	Redman LM, Smith SR, Burton JH, Martin CK, Il'yasova D, Ravussin E.	Cell Metab. 2018 Apr 3;27(4):805-815.e4. doi: 10.1016/j.cmet.2018.02.019. Epub 2018 Mar 22.	Redman LM	Cell Metab	2018	27/03/2018	PMC5886711	NIHMS952346	10.1016/j.cmet.2018.02.019
29575469	The effects of graded caloric restriction: XII. Comparison of mouse to human impact on cellular senescence in the colon	Fontana L, Mitchell SE, Wang B, Tosti V, van Vliet T, Veronese N, Bertozzi B, Early DS, Maissan P, Speakman JR, Demaria M.	Aging Cell. 2018 Jun;17(3):e12746. doi: 10.1111/acel.12746. Epub 2018 Mar 25.	Fontana L	Aging Cell	2018	26/03/2018	PMC5946078		10.1111/acel.12746
29575594	Preoperative weight loss program involving a 20-day very low-calorie diet for obesity before laparoscopic gastrectomy for gastric cancer	Inoue K, Yoshiuchi S, Yoshida M, Nakamura N, Nakajima S, Kitamura A, Mouri K, Michiura T, Mukaide H, Ozaki T, Miki H, Yanagimoto H, Satoi S, Kaibori M, Hamada M, Kimura Y, Kon M.	Asian J Endosc Surg. 2019 Jan;12(1):43-50. doi: 10.1111/ases.12479. Epub 2018 Mar 25.	Inoue K	Asian J Endosc Surg	2019	26/03/2018	PMC6585812		10.1111/ases.12479
29562943	Predominant gut Lactobacillus murinus strain mediates anti-inflammaging effects in calorie-restricted mice	Pan F, Zhang L, Li M, Hu Y, Zeng B, Yuan H, Zhao L, Zhang C.	Microbiome. 2018 Mar 21;6(1):54. doi: 10.1186/s40168-018-0440-5.	Pan F	Microbiome	2018	23/03/2018	PMC5863386		10.1186/s40168-018-0440-5
29557938	The Author's Reply	Spengler EK.	Transplantation. 2018 Apr;102(4):e189-e190. doi: 10.1097/TP.0000000000002064.	Spengler EK	Transplantation	2018	21/03/2018			10.1097/TP.0000000000002064
29556158	Calorie restriction regime enhances physical performance of trained athletes	Pons V, Riera J, Capó X, Martorell M, Sureda A, Tur JA, Drobnic F, Pons A.	J Int Soc Sports Nutr. 2018 Mar 9;15:12. doi: 10.1186/s12970-018-0214-2. eCollection 2018.	Pons V	J Int Soc Sports Nutr	2018	21/03/2018	PMC5845356		10.1186/s12970-018-0214-2
29552018	Caloric Restriction Mimetic 2-Deoxyglucose Alleviated Inflammatory Lung Injury via Suppressing Nuclear Pyruvate Kinase M2-Signal Transducer and Activator of Transcription 3 Pathway	Hu K, Yang Y, Lin L, Ai Q, Dai J, Fan K, Ge P, Jiang R, Wan J, Zhang L.	Front Immunol. 2018 Mar 2;9:426. doi: 10.3389/fimmu.2018.00426. eCollection 2018.	Hu K	Front Immunol	2018	20/03/2018	PMC5840172		10.3389/fimmu.2018.00426
29548805	Weight Loss and Adipose Tissue Browning in Humans: The Chicken or the Egg?	Balazova L, Wolfrum C, Balaz M.	Trends Endocrinol Metab. 2018 Jul;29(7):450-452. doi: 10.1016/j.tem.2018.03.004. Epub 2018 Mar 13.	Balazova L	Trends Endocrinol Metab	2018	18/03/2018			10.1016/j.tem.2018.03.004
29546320	Relationship of Physical Function to Single Muscle Fiber Contractility in Older Adults: Effects of Resistance Training With and Without Caloric Restriction	Wang ZM, Leng X, Messi ML, Choi SJ, Marsh AP, Nicklas B, Delbono O.	J Gerontol A Biol Sci Med Sci. 2019 Feb 15;74(3):412-419. doi: 10.1093/gerona/gly047.	Wang ZM	J Gerontol A Biol Sci Med Sci	2019	17/03/2018	PMC6376083		10.1093/gerona/gly047
29539939	Re: Effect of Calorie Restriction on Mood, Quality of Life, Sleep, and Sexual Function in Healthy Nonobese Adults: The CALERIE 2 Randomized Clinical Trial	Seftel AD.	J Urol. 2017 May;197(5):1332-1334. doi: 10.1016/j.juro.2017.02.059. Epub 2017 Feb 21.	Seftel AD	J Urol	2017	16/03/2018			10.1016/j.juro.2017.02.059
29543138	Exercise and weight loss effects on cardiovascular risk factors in overweight men	Rosenkilde M, Rygaard L, Nordby P, Nielsen LB, Stallknecht B.	J Appl Physiol (1985). 2018 Sep 1;125(3):901-908. doi: 10.1152/japplphysiol.01092.2017. Epub 2018 Mar 15.	Rosenkilde M	J Appl Physiol (1985)	2018	16/03/2018			10.1152/japplphysiol.01092.2017
29535115	Caloric Restriction as a Therapeutic Approach to Heart Failure: Can Less Be More in (Mice) and Men?	Sandesara PB, Sperling LS.	Circ Heart Fail. 2018 Mar;11(3):e004930. doi: 10.1161/CIRCHEARTFAILURE.118.004930.	Sandesara PB	Circ Heart Fail	2018	15/03/2018			10.1161/CIRCHEARTFAILURE.118.004930
29535139	Preoperative Short-Term Calorie Restriction for Prevention of Acute Kidney Injury After Cardiac Surgery: A Randomized, Controlled, Open-Label, Pilot Trial	Grundmann F, Müller RU, Reppenhorst A, Hülswitt L, Späth MR, Kubacki T, Scherner M, Faust M, Becker I, Wahlers T, Schermer B, Benzing T, Burst V.	J Am Heart Assoc. 2018 Mar 13;7(6):e008181. doi: 10.1161/JAHA.117.008181.	Grundmann F	J Am Heart Assoc	2018	15/03/2018	PMC5907569		10.1161/JAHA.117.008181
29532316	Modifications of Resting Energy Expenditure After Sleeve Gastrectomy	Bettini S, Bordigato E, Fabris R, Serra R, Dal Pra' C, Belligoli A, Sanna M, Compagnin C, Foletto M, Prevedello L, Fioretto P, Vettor R, Busetto L.	Obes Surg. 2018 Aug;28(8):2481-2486. doi: 10.1007/s11695-018-3190-3.	Bettini S	Obes Surg	2018	14/03/2018			10.1007/s11695-018-3190-3
29532631	Roux-en-Y gastric bypass compared with equivalent diet restriction: Mechanistic insights into diabetes remission	Pop LM, Mari A, Zhao TJ, Mitchell L, Burgess S, Li X, Adams-Huet B, Lingvay I.	Diabetes Obes Metab. 2018 Jul;20(7):1710-1721. doi: 10.1111/dom.13287. Epub 2018 Apr 10.	Pop LM	Diabetes Obes Metab	2018	14/03/2018	PMC5999551	NIHMS951433	10.1111/dom.13287
29508693	Intermittent v. continuous energy restriction: differential effects on postprandial glucose and lipid metabolism following matched weight loss in overweight/obese participants	Antoni R, Johnston KL, Collins AL, Robertson MD.	Br J Nutr. 2018 Mar;119(5):507-516. doi: 10.1017/S0007114517003890.	Antoni R	Br J Nutr	2018	2018-07-03			10.1017/S0007114517003890
29500968	Effects of a hypoenergetic diet rich in α-linolenic acid on fatty acid composition of serum phospholipids in overweight and obese patients with metabolic syndrome	Egert S, Baxheinrich A, Lee-Barkey YH, Tschoepe D, Stehle P, Stratmann B, Wahrburg U.	Nutrition. 2018 May;49:74-80. doi: 10.1016/j.nut.2017.11.002. Epub 2017 Dec 2.	Egert S	Nutrition	2018	2018-04-03			10.1016/j.nut.2017.11.002
29498351	Effect of increased calcium consumption from fat-free milk in an energy-restricted diet on the metabolic syndrome and cardiometabolic outcomes in adults with type 2 diabetes mellitus: a randomised cross-over clinical trial	Gomes JMG, Costa JDA, Alfenas RCG.	Br J Nutr. 2018 Feb;119(4):422-430. doi: 10.1017/S0007114517003956.	Gomes JMG	Br J Nutr	2018	2018-03-03			10.1017/S0007114517003956
29490275	Aspirin Recapitulates Features of Caloric Restriction	Pietrocola F, Castoldi F, Markaki M, Lachkar S, Chen G, Enot DP, Durand S, Bossut N, Tong M, Malik SA, Loos F, Dupont N, Mariño G, Abdelkader N, Madeo F, Maiuri MC, Kroemer R, Codogno P, Sadoshima J, Tavernarakis N, Kroemer G.	Cell Rep. 2018 Feb 27;22(9):2395-2407. doi: 10.1016/j.celrep.2018.02.024.	Pietrocola F	Cell Rep	2018	2018-01-03	PMC5848858		10.1016/j.celrep.2018.02.024
29480874	EVIDENT 3 Study: A randomized, controlled clinical trial to reduce inactivity and caloric intake in sedentary and overweight or obese people using a smartphone application: Study protocol	Recio-Rodriguez JI, Gómez-Marcos MA, Agudo-Conde C, Ramirez I, Gonzalez-Viejo N, Gomez-Arranz A, Salcedo-Aguilar F, Rodriguez-Sanchez E, Alonso-Domínguez R, Sánchez-Aguadero N, Gonzalez-Sanchez J, Garcia-Ortiz L; EVIDENT 3 investigators.	Medicine (Baltimore). 2018 Jan;97(2):e9633. doi: 10.1097/MD.0000000000009633.	Recio-Rodriguez JI	Medicine (Baltimore)	2018	27/02/2018	PMC5943855		10.1097/MD.0000000000009633
29471812	Effect of weight loss on circulating fatty acid profiles in overweight subjects with high visceral fat area: a 12-week randomized controlled trial	Lee YJ, Lee A, Yoo HJ, Kim M, Kim M, Jee SH, Shin DY, Lee JH.	Nutr J. 2018 Feb 22;17(1):28. doi: 10.1186/s12937-018-0323-4.	Lee YJ	Nutr J	2018	24/02/2018	PMC5822615		10.1186/s12937-018-0323-4
29471068	Weight loss decreases self-reported appetite and alters food preferences in overweight and obese adults: Observational data from the DiOGenes study	Andriessen C, Christensen P, Vestergaard Nielsen L, Ritz C, Astrup A, Meinert Larsen T, Martinez JA, Saris WHM, van Baak MA, Papadaki A, Kunesova M, Jebb S, Blundell J, Lawton C, Raben A.	Appetite. 2018 Jun 1;125:314-322. doi: 10.1016/j.appet.2018.02.016. Epub 2018 Feb 19.	Andriessen C	Appetite	2018	23/02/2018			10.1016/j.appet.2018.02.016
29445118	N(1)-methylnicotinamide is a signalling molecule produced in skeletal muscle coordinating energy metabolism	Ström K, Morales-Alamo D, Ottosson F, Edlund A, Hjort L, Jörgensen SW, Almgren P, Zhou Y, Martin-Rincon M, Ekman C, Pérez-López A, Ekström O, Perez-Suarez I, Mattiasson M, de Pablos-Velasco P, Oskolkov N, Ahlqvist E, Wierup N, Eliasson L, Vaag A, Groop L, Stenkula KG, Fernandez C, Calbet JAL, Holmberg HC, Hansson O.	Sci Rep. 2018 Feb 14;8(1):3016. doi: 10.1038/s41598-018-21099-1.	Ström K	Sci Rep	2018	16/02/2018	PMC5813101		10.1038/s41598-018-21099-1
29438540	Influence of sleep restriction on weight loss outcomes associated with caloric restriction	Wang X, Sparks JR, Bowyer KP, Youngstedt SD.	Sleep. 2018 May 1;41(5):10.1093/sleep/zsy027. doi: 10.1093/sleep/zsy027.	Wang X	Sleep	2018	14/02/2018	PMC8591680	HRAMS1754198	10.1093/sleep/zsy027
29431471	Appetite Suppression and Altered Food Preferences Coincide with Changes in Appetite-Mediating Hormones During Energy Deficit at High Altitude, But Are Not Affected by Protein Intake	Karl JP, Cole RE, Berryman CE, Finlayson G, Radcliffe PN, Kominsky MT, Murphy NE, Carbone JW, Rood JC, Young AJ, Pasiakos SM.	High Alt Med Biol. 2018 Jun;19(2):156-169. doi: 10.1089/ham.2017.0155. Epub 2018 Feb 12.	Karl JP	High Alt Med Biol	2018	13/02/2018	PMC6014054		10.1089/ham.2017.0155
29424490	Effects of 2 years of caloric restriction on oxidative status assessed by urinary F2-isoprostanes: The CALERIE 2 randomized clinical trial	Il'yasova D, Fontana L, Bhapkar M, Pieper CF, Spasojevic I, Redman LM, Das SK, Huffman KM, Kraus WE; CALERIE Study Investigators.	Aging Cell. 2018 Apr;17(2):e12719. doi: 10.1111/acel.12719. Epub 2018 Feb 9.	Il'yasova D	Aging Cell	2018	2018-10-02	PMC5847862		10.1111/acel.12719
29424957	HNF1A variant, energy-reduced diets and insulin resistance improvement during weight loss: The POUNDS Lost trial and DIRECT	Huang T, Wang T, Heianza Y, Sun D, Ivey K, Durst R, Schwarzfuchs D, Stampfer MJ, Bray GA, Sacks FM, Shai I, Qi L.	Diabetes Obes Metab. 2018 Jun;20(6):1445-1452. doi: 10.1111/dom.13250. Epub 2018 Mar 5.	Huang T	Diabetes Obes Metab	2018	2018-10-02			10.1111/dom.13250
29417384	Effects of Agave fructans (Agave tequilana Weber var. azul) on Body Fat and Serum Lipids in Obesity	Padilla-Camberos E, Barragán-Álvarez CP, Diaz-Martinez NE, Rathod V, Flores-Fernández JM.	Plant Foods Hum Nutr. 2018 Mar;73(1):34-39. doi: 10.1007/s11130-018-0654-5.	Padilla-Camberos E	Plant Foods Hum Nutr	2018	2018-09-02			10.1007/s11130-018-0654-5
29405359	Intermittent fasting in Type 2 diabetes mellitus and the risk of hypoglycaemia: a randomized controlled trial	Corley BT, Carroll RW, Hall RM, Weatherall M, Parry-Strong A, Krebs JD.	Diabet Med. 2018 May;35(5):588-594. doi: 10.1111/dme.13595. Epub 2018 Feb 27.	Corley BT	Diabet Med	2018	2018-07-02			10.1111/dme.13595
29405868	Examination of the relationships between dietary restraint, alcohol, and adverse problems among women	Buchholz LJ, Crowther JH, Ciesla JA.	J Am Coll Health. 2018 Jul;66(5):384-392. doi: 10.1080/07448481.2018.1431904. Epub 2018 Mar 12.	Buchholz LJ	J Am Coll Health	2018	2018-07-02			10.1080/07448481.2018.1431904
29398616	Hypothalamic miR-219 regulates individual metabolic differences in response to diet-induced weight cycling	Schroeder M, Drori Y, Ben-Efraim YJ, Chen A.	Mol Metab. 2018 Mar;9:176-186. doi: 10.1016/j.molmet.2018.01.015. Epub 2018 Feb 2.	Schroeder M	Mol Metab	2018	2018-06-02	PMC5870106		10.1016/j.molmet.2018.01.015
29394908	Intermittent fasting, energy balance and associated health outcomes in adults: study protocol for a randomised controlled trial	Templeman I, Thompson D, Gonzalez J, Walhin JP, Reeves S, Rogers PJ, Brunstrom JM, Karagounis LG, Tsintzas K, Betts JA.	Trials. 2018 Feb 2;19(1):86. doi: 10.1186/s13063-018-2451-8.	Templeman I	Trials	2018	2018-04-02	PMC5797418		10.1186/s13063-018-2451-8
29386128	Caloric Restriction and Diet-Induced Weight Loss Do Not Induce Browning of Human Subcutaneous White Adipose Tissue in Women and Men with Obesity	Barquissau V, Léger B, Beuzelin D, Martins F, Amri EZ, Pisani DF, Saris WHM, Astrup A, Maoret JJ, Iacovoni J, Déjean S, Moro C, Viguerie N, Langin D.	Cell Rep. 2018 Jan 23;22(4):1079-1089. doi: 10.1016/j.celrep.2017.12.102. Epub 2018 Jan 28.	Barquissau V	Cell Rep	2018	2018-02-02			10.1016/j.celrep.2017.12.102
29378104	[Comparative assessment of efficiency of the low-calorie diets modified by proteinaceous and vitamin cocktails]	Chekhonina YG, Gapparova KM, Sharafetdinov KK, Grigoryan ON.	Vopr Pitan. 2015;84(6):99-106.	Chekhonina YG	Vopr Pitan	2015	30/01/2018
29362766	Effects of calorie restriction plus fish oil supplementation on abnormal metabolic characteristics and the iron status of middle-aged obese women	Utami FA , Lee HC , Su CT , Guo YR , Tung YT , Huang SY .	Food Funct. 2018 Feb 21;9(2):1152-1162. doi: 10.1039/c7fo01787a.	Utami FA	Food Funct	2018	25/01/2018			10.1039/c7fo01787a
29358486	Cellular Energy Sensing and Metabolism-Implications for Treating Diabetes: The 2017 Outstanding Scientific Achievement Award Lecture	Steinberg GR.	Diabetes. 2018 Feb;67(2):169-179. doi: 10.2337/dbi17-0039.	Steinberg GR	Diabetes	2018	24/01/2018			10.2337/dbi17-0039
29357107	Balancing exercise-induced weight loss with protein caloric requirement remains a challenge in overweight patients with cirrhosis	Dhaliwal A, Towey J, Haydon G, Elsharkawy AM, Armstrong MJ.	Hepatology. 2018 Apr;67(4):1644-1645. doi: 10.1002/hep.29801. Epub 2018 Feb 28.	Dhaliwal A	Hepatology	2018	23/01/2018			10.1002/hep.29801
29353535	Eating behavior traits of successful weight losers during 12 months of alternate-day fasting: An exploratory analysis of a randomized controlled trial	Kroeger CM, Trepanowski JF, Klempel MC, Barnosky A, Bhutani S, Gabel K, Varady KA.	Nutr Health. 2018 Mar;24(1):5-10. doi: 10.1177/0260106017753487. Epub 2018 Jan 22.	Kroeger CM	Nutr Health	2018	23/01/2018	PMC7183822	NIHMS1579439	10.1177/0260106017753487
29353271	Erythrocytes and Skeletal Muscle Unsaturated and Omega-6 Fatty Acids Are Positively Correlated after Caloric Restriction and Exercise	Martorell M, Pons V, Domingo JC, Capó X, Sureda A, Drobnic F, Tur JA, Pons A.	Ann Nutr Metab. 2018;72(2):126-133. doi: 10.1159/000486553. Epub 2018 Jan 19.	Martorell M	Ann Nutr Metab	2018	22/01/2018			10.1159/000486553
29351490	Significant improvement in cardiometabolic health in healthy nonobese individuals during caloric restriction-induced weight loss and weight loss maintenance	Most J, Gilmore LA, Smith SR, Han H, Ravussin E, Redman LM.	Am J Physiol Endocrinol Metab. 2018 Apr 1;314(4):E396-E405. doi: 10.1152/ajpendo.00261.2017. Epub 2017 Dec 12.	Most J	Am J Physiol Endocrinol Metab	2018	20/01/2018	PMC5966756		10.1152/ajpendo.00261.2017
29345068	International Diabetes Federation 2017	Carracher AM, Marathe PH, Close KL.	J Diabetes. 2018 May;10(5):353-356. doi: 10.1111/1753-0407.12644. Epub 2018 Feb 13.	Carracher AM	J Diabetes	2018	19/01/2018			10.1111/1753-0407.12644
29343706	Caloric restriction lowers endocannabinoid tonus and improves cardiac function in type 2 diabetes	van Eyk HJ, van Schinkel LD, Kantae V, Dronkers CEA, Westenberg JJM, de Roos A, Lamb HJ, Jukema JW, Harms AC, Hankemeier T, van der Stelt M, Jazet IM, Rensen PCN, Smit JWA.	Nutr Diabetes. 2018 Jan 17;8(1):6. doi: 10.1038/s41387-017-0016-7.	van Eyk HJ	Nutr Diabetes	2018	19/01/2018	PMC5851430		10.1038/s41387-017-0016-7
29339649	Cardiovascular Risk Factors and Insulin Resistance after Two Hypocaloric Diets with Different Fat Distribution in Obese Subjects: Effect of the rs10767664 Gene Variant in Brain-Derived Neurotrophic Factor	de Luis DA, Romero E, Izaola O, Primo D, Aller R.	J Nutrigenet Nutrigenomics. 2017;10(5-6):163-171. doi: 10.1159/000485248. Epub 2018 Jan 17.	de Luis DA	J Nutrigenet Nutrigenomics	2017	18/01/2018			10.1159/000485248
29331538	Differential lipid metabolism outcomes associated with ADRB2 gene polymorphisms in response to two dietary interventions in overweight/obese subjects	Ramos-Lopez O, Riezu-Boj JI, Milagro FI, Goni L, Cuervo M, Martinez JA.	Nutr Metab Cardiovasc Dis. 2018 Feb;28(2):165-172. doi: 10.1016/j.numecd.2017.11.006. Epub 2017 Dec 5.	Ramos-Lopez O	Nutr Metab Cardiovasc Dis	2018	15/01/2018			10.1016/j.numecd.2017.11.006
29329923	Different protein composition of low-calorie diet differently impacts adipokine profile irrespective of weight loss in overweight and obese women	Mateo-Gallego R, Lamiquiz-Moneo I, Perez-Calahorra S, Marco-Benedí V, Bea AM, Baila-Rueda L, Laclaustra M, Peñalvo JL, Civeira F, Cenarro A.	Nutr Metab Cardiovasc Dis. 2018 Feb;28(2):133-142. doi: 10.1016/j.numecd.2017.10.024. Epub 2017 Nov 4.	Mateo-Gallego R	Nutr Metab Cardiovasc Dis	2018	14/01/2018			10.1016/j.numecd.2017.10.024
29325890	Calorie Labels on the Restaurant Menu: Is the Use of Weight-Control Behaviors Related to Ordering Decisions?	Larson N, Haynos AF, Roberto CA, Loth KA, Neumark-Sztainer D.	J Acad Nutr Diet. 2018 Mar;118(3):399-408. doi: 10.1016/j.jand.2017.11.007. Epub 2018 Jan 8.	Larson N	J Acad Nutr Diet	2018	13/01/2018	PMC5828876	NIHMS920761	10.1016/j.jand.2017.11.007
29325772	The association of SNP276G>T at adiponectin gene with insulin resistance and circulating adiponectin in response to two different hypocaloric diets	de Luis DA, Izaola O, Primo D, Aller R, Ortola A, Gómez E, Lopez JJ.	Diabetes Res Clin Pract. 2018 Mar;137:93-99. doi: 10.1016/j.diabres.2018.01.003. Epub 2018 Jan 8.	de Luis DA	Diabetes Res Clin Pract	2018	13/01/2018			10.1016/j.diabres.2018.01.003
29329258	Association between Haem and Non-Haem Iron Intake and Serum Ferritin in Healthy Young Women	Young I, Parker HM, Rangan A, Prvan T, Cook RL, Donges CE, Steinbeck KS, O'Dwyer NJ, Cheng HL, Franklin JL, O'Connor HT.	Nutrients. 2018 Jan 12;10(1):81. doi: 10.3390/nu10010081.	Young I	Nutrients	2018	13/01/2018	PMC5793309		10.3390/nu10010081
29313746	Comparison of Calorie-Restricted Diet and Resveratrol Supplementation on Anthropometric Indices, Metabolic Parameters, and Serum Sirtuin-1 Levels in Patients With Nonalcoholic Fatty Liver Disease: A Randomized Controlled Clinical Trial	Asghari S, Asghari-Jafarabadi M, Somi MH, Ghavami SM, Rafraf M.	J Am Coll Nutr. 2018 Mar-Apr;37(3):223-233. doi: 10.1080/07315724.2017.1392264. Epub 2018 Jan 9.	Asghari S	J Am Coll Nutr	2018	2018-10-01			10.1080/07315724.2017.1392264
29307498	Self-affirmation improves self-control over snacking among participants low in eating self-efficacy	Churchill S, Jessop DC, Green R, Harris PR.	Appetite. 2018 Apr 1;123:264-268. doi: 10.1016/j.appet.2017.12.028. Epub 2018 Jan 5.	Churchill S	Appetite	2018	2018-09-01			10.1016/j.appet.2017.12.028
29304744	A randomised controlled intervention study investigating the efficacy of carotenoid-rich fruits and vegetables and extra-virgin olive oil on attenuating sarcopenic symptomology in overweight and obese older adults during energy intake restriction: protocol paper	Villani A, Wright H, Slater G, Buckley J.	BMC Geriatr. 2018 Jan 5;18(1):2. doi: 10.1186/s12877-017-0700-4.	Villani A	BMC Geriatr	2018	2018-07-01	PMC5755414		10.1186/s12877-017-0700-4
29305890	Computer training of attention and inhibition for youngsters with obesity: A pilot study	Verbeken S, Braet C, Naets T, Houben K, Boendermaker W; Zeepreventorium vzw.	Appetite. 2018 Apr 1;123:439-447. doi: 10.1016/j.appet.2017.12.029. Epub 2018 Jan 3.	Verbeken S	Appetite	2018	2018-07-01			10.1016/j.appet.2017.12.029
29305401	Changes in Gut Microbiota-Related Metabolites and Long-term Successful Weight Loss in Response to Weight-Loss Diets: The POUNDS Lost Trial	Heianza Y, Sun D, Smith SR, Bray GA, Sacks FM, Qi L.	Diabetes Care. 2018 Mar;41(3):413-419. doi: 10.2337/dc17-2108. Epub 2018 Jan 5.	Heianza Y	Diabetes Care	2018	2018-07-01	PMC5829970		10.2337/dc17-2108
29288545	A Randomized Trial of Lorcaserin and Lifestyle Counseling for Maintaining Weight Loss Achieved with a Low-Calorie Diet	Shaw Tronieri J, Wadden TA, Berkowitz RI, Chao AM, Pearl RL, Alamuddin N, Leonard SM, Carvajal R, Bakizada ZM, Pinkasavage E, Gruber KA, Walsh OA, Alfaris N.	Obesity (Silver Spring). 2018 Feb;26(2):299-309. doi: 10.1002/oby.22081. Epub 2017 Dec 29.	Shaw Tronieri J	Obesity (Silver Spring)	2018	31/12/2017			10.1002/oby.22081
29284607	Weight Loss and Exercise Alter the High-Density Lipoprotein Lipidome and Improve High-Density Lipoprotein Functionality in Metabolic Syndrome	Khan AA, Mundra PA, Straznicky NE, Nestel PJ, Wong G, Tan R, Huynh K, Ng TW, Mellett NA, Weir JM, Barlow CK, Alshehry ZH, Lambert GW, Kingwell BA, Meikle PJ.	Arterioscler Thromb Vasc Biol. 2018 Feb;38(2):438-447. doi: 10.1161/ATVBAHA.117.310212. Epub 2017 Dec 28.	Khan AA	Arterioscler Thromb Vasc Biol	2018	30/12/2017			10.1161/ATVBAHA.117.310212
29278575	Very Low-Calorie Diet, the Morbidly Obese With Liver Cirrhosis and Bariatric Surgery	Iannelli A, Schiavo L.	Transplantation. 2018 Apr;102(4):e188-e189. doi: 10.1097/TP.0000000000002065.	Iannelli A	Transplantation	2018	27/12/2017			10.1097/TP.0000000000002065
29273768	Small-molecule TFEB pathway agonists that ameliorate metabolic syndrome in mice and extend C. elegans lifespan	Wang C, Niederstrasser H, Douglas PM, Lin R, Jaramillo J, Li Y, Oswald NW, Zhou A, McMillan EA, Mendiratta S, Wang Z, Zhao T, Lin Z, Luo M, Huang G, Brekken RA, Posner BA, MacMillan JB, Gao J, White MA.	Nat Commun. 2017 Dec 22;8(1):2270. doi: 10.1038/s41467-017-02332-3.	Wang C	Nat Commun	2017	24/12/2017	PMC5741634		10.1038/s41467-017-02332-3
29266667	Plasticity of lifelong calorie-restricted C57BL/6J mice in adapting to a medium-fat diet intervention at old age	Rusli F, Boekschoten MV, Borelli V, Sun C, Lute C, Menke AL, van den Heuvel J, Salvioli S, Franceschi C, Müller M, Steegenga WT.	Aging Cell. 2018 Apr;17(2):e12696. doi: 10.1111/acel.12696. Epub 2017 Dec 21.	Rusli F	Aging Cell	2018	22/12/2017	PMC5847878		10.1111/acel.12696
29258868	When exercise does not pay: Counterproductive effects of impending exercise on energy intake among restrained eaters	Sim AY, Lee LL, Cheon BK.	Appetite. 2018 Apr 1;123:120-127. doi: 10.1016/j.appet.2017.12.017. Epub 2017 Dec 16.	Sim AY	Appetite	2018	21/12/2017			10.1016/j.appet.2017.12.017
29258678	Effects of alternate-day fasting or daily calorie restriction on body composition, fat distribution, and circulating adipokines: Secondary analysis of a randomized controlled trial	Trepanowski JF, Kroeger CM, Barnosky A, Klempel M, Bhutani S, Hoddy KK, Rood J, Ravussin E, Varady KA.	Clin Nutr. 2018 Dec;37(6 Pt A):1871-1878. doi: 10.1016/j.clnu.2017.11.018. Epub 2017 Dec 5.	Trepanowski JF	Clin Nutr	2018	21/12/2017	PMC5988907	NIHMS928508	10.1016/j.clnu.2017.11.018
29240911	Caloric Restriction Research: New Perspectives on the Biology of Aging	Anderson RM, Le Couteur DG, de Cabo R.	J Gerontol A Biol Sci Med Sci. 2017 Dec 12;73(1):1-3. doi: 10.1093/gerona/glx212.	Anderson RM	J Gerontol A Biol Sci Med Sci	2017	15/12/2017	PMC6279158		10.1093/gerona/glx212
29233588	Changes in circulating miRNAs in healthy overweight and obese subjects: Effect of diet composition and weight loss	Giardina S, Hernández-Alonso P, Díaz-López A, Salas-Huetos A, Salas-Salvadó J, Bulló M.	Clin Nutr. 2019 Feb;38(1):438-443. doi: 10.1016/j.clnu.2017.11.014. Epub 2017 Dec 1.	Giardina S	Clin Nutr	2019	14/12/2017			10.1016/j.clnu.2017.11.014
29233536	LEAP2 Is an Endogenous Antagonist of the Ghrelin Receptor	Ge X, Yang H, Bednarek MA, Galon-Tilleman H, Chen P, Chen M, Lichtman JS, Wang Y, Dalmas O, Yin Y, Tian H, Jermutus L, Grimsby J, Rondinone CM, Konkar A, Kaplan DD.	Cell Metab. 2018 Feb 6;27(2):461-469.e6. doi: 10.1016/j.cmet.2017.10.016. Epub 2017 Dec 7.	Ge X	Cell Metab	2018	14/12/2017			10.1016/j.cmet.2017.10.016
29203893	Phase II prospective randomized trial of weight loss prior to radical prostatectomy	Henning SM, Galet C, Gollapudi K, Byrd JB, Liang P, Li Z, Grogan T, Elashoff D, Magyar CE, Said J, Cohen P, Aronson WJ.	Prostate Cancer Prostatic Dis. 2018 Jun;21(2):212-220. doi: 10.1038/s41391-017-0001-1. Epub 2017 Dec 4.	Henning SM	Prostate Cancer Prostatic Dis	2018	2017-06-12	PMC5986584	NIHMS890053	10.1038/s41391-017-0001-1
29197218	The effect of electro-acupuncture on pro-oxidant antioxidant balance values in overweight and obese subjects: a randomized controlled trial study	Mazidi M, Abbasi-Parizad P, Abdi H, Zhao B, Rahsepar AA, Tavallaie S, Parizadeh SM, Rezaie P, Safariyan M, Nematy M, Mohammadi M, Darbandi M, Darbandi S, Ghayour-Mobarhan M, Ferns GA.	J Complement Integr Med. 2017 Dec 1;15(2):/j/jcim.2018.15.issue-2/jcim-2015-0081/jcim-2015-0081.xml. doi: 10.1515/jcim-2015-0081.	Mazidi M	J Complement Integr Med	2017	2017-03-12			10.1515/jcim-2015-0081
29178536	Effects of an energy-restricted low-carbohydrate, high unsaturated fat/low saturated fat diet versus a high-carbohydrate, low-fat diet in type 2 diabetes: A 2-year randomized clinical trial	Tay J, Thompson CH, Luscombe-Marsh ND, Wycherley TP, Noakes M, Buckley JD, Wittert GA, Yancy WS Jr, Brinkworth GD.	Diabetes Obes Metab. 2018 Apr;20(4):858-871. doi: 10.1111/dom.13164. Epub 2017 Dec 20.	Tay J	Diabetes Obes Metab	2018	28/11/2017			10.1111/dom.13164
29170121	Personal relative deprivation increases self-selected portion sizes and food intake	Sim AY, Lim EX, Forde CG, Cheon BK.	Appetite. 2018 Feb 1;121:268-274. doi: 10.1016/j.appet.2017.11.100. Epub 2017 Nov 21.	Sim AY	Appetite	2018	25/11/2017			10.1016/j.appet.2017.11.100
29170538	Diabetes: Very-low-calorie diet reverses T2DM in rats	Morris A.	Nat Rev Endocrinol. 2018 Jan;14(1):2. doi: 10.1038/nrendo.2017.159. Epub 2017 Nov 24.	Morris A	Nat Rev Endocrinol	2018	25/11/2017			10.1038/nrendo.2017.159
29151077	Weight loss-dependent and -independent effects of moderate calorie restriction on endothelial cell markers in obesity	Korybalska K, Luczak J, Swora-Cwynar E, Kanikowska A, Czepulis N, Kanikowska D, Skalisz H, Breborowicz A, Grzymislawski M, Witowski J.	J Physiol Pharmacol. 2017 Aug;68(4):597-608.	Korybalska K	J Physiol Pharmacol	2017	20/11/2017
29142618	Melatonin Supplementation Lowers Oxidative Stress and Regulates Adipokines in Obese Patients on a Calorie-Restricted Diet	Szewczyk-Golec K, Rajewski P, Gackowski M, Mila-Kierzenkowska C, Wesołowski R, Sutkowy P, Pawłowska M, Woźniak A.	Oxid Med Cell Longev. 2017;2017:8494107. doi: 10.1155/2017/8494107. Epub 2017 Sep 21.	Szewczyk-Golec K	Oxid Med Cell Longev	2017	17/11/2017	PMC5632922		10.1155/2017/8494107
29143803	Use of Novel High-Protein Functional Food Products as Part of a Calorie-Restricted Diet to Reduce Insulin Resistance and Increase Lean Body Mass in Adults: A Randomized Controlled Trial	Johnston CS, Sears B, Perry M, Knurick JR.	Nutrients. 2017 Oct 28;9(11):1182. doi: 10.3390/nu9111182.	Johnston CS	Nutrients	2017	17/11/2017	PMC5707654		10.3390/nu9111182
29119687	Combining biological and psychosocial baseline variables did not improve prediction of outcome of a very-low-energy diet in a clinic referral population	Sumithran P, Purcell K, Kuyruk S, Proietto J, Prendergast LA.	Clin Obes. 2018 Feb;8(1):30-38. doi: 10.1111/cob.12229. Epub 2017 Nov 8.	Sumithran P	Clin Obes	2018	2017-10-11			10.1111/cob.12229
29111889	The Combined Effects of Exercise, Diet, and a Multi-Ingredient Dietary Supplement on Body Composition and Adipokine Changes in Overweight Adults	Arent SM, Walker AJ, Pellegrino JK, Sanders DJ, McFadden BA, Ziegenfuss TN, Lopez HL.	J Am Coll Nutr. 2018 Feb;37(2):111-120. doi: 10.1080/07315724.2017.1368039. Epub 2017 Nov 7.	Arent SM	J Am Coll Nutr	2018	2017-08-11			10.1080/07315724.2017.1368039
29110281	The effect of vitamin D supplementation in combination with low-calorie diet on anthropometric indices and androgen hormones in women with polycystic ovary syndrome: a double-blind, randomized, placebo-controlled trial	Jafari-Sfidvajani S, Ahangari R, Hozoori M, Mozaffari-Khosravi H, Fallahzadeh H, Nadjarzadeh A.	J Endocrinol Invest. 2018 May;41(5):597-607. doi: 10.1007/s40618-017-0785-9. Epub 2017 Nov 6.	Jafari-Sfidvajani S	J Endocrinol Invest	2018	2017-08-11			10.1007/s40618-017-0785-9
29107505	System-wide Benefits of Intermeal Fasting by Autophagy	Martinez-Lopez N, Tarabra E, Toledo M, Garcia-Macia M, Sahu S, Coletto L, Batista-Gonzalez A, Barzilai N, Pessin JE, Schwartz GJ, Kersten S, Singh R.	Cell Metab. 2017 Dec 5;26(6):856-871.e5. doi: 10.1016/j.cmet.2017.09.020. Epub 2017 Oct 26.	Martinez-Lopez N	Cell Metab	2017	2017-07-11	PMC5718973	NIHMS910100	10.1016/j.cmet.2017.09.020
29098545	Non-alcoholic Fatty Liver Disease in Morbidly Obese Individuals Undergoing Bariatric Surgery: Prevalence and Effect of the Pre-Bariatric Very Low Calorie Diet	Schwenger KJP, Fischer SE, Jackson TD, Okrainec A, Allard JP.	Obes Surg. 2018 Apr;28(4):1109-1116. doi: 10.1007/s11695-017-2980-3.	Schwenger KJP	Obes Surg	2018	2017-04-11			10.1007/s11695-017-2980-3
29099051	Dietary Intake after Weight Loss and the Risk of Weight Regain: Macronutrient Composition and Inflammatory Properties of the Diet	Muhammad HFL, Vink RG, Roumans NJT, Arkenbosch LAJ, Mariman EC, van Baak MA.	Nutrients. 2017 Nov 2;9(11):1205. doi: 10.3390/nu9111205.	Muhammad HFL	Nutrients	2017	2017-04-11	PMC5707677		10.3390/nu9111205
29084207	Upregulation of the ALDOA/DNA-PK/p53 pathway by dietary restriction suppresses tumor growth	Ma D, Chen X, Zhang PY, Zhang H, Wei LJ, Hu S, Tang JZ, Zhou MT, Xie C, Ou R, Xu Y, Tang KF.	Oncogene. 2018 Feb 22;37(8):1041-1048. doi: 10.1038/onc.2017.398. Epub 2017 Oct 30.	Ma D	Oncogene	2018	31/10/2017			10.1038/onc.2017.398
29070730	A novel caloric restriction mediator	Kobayashi M, Higami Y.	Aging (Albany NY). 2017 Oct 25;9(10):2012-2013. doi: 10.18632/aging.101311.	Kobayashi M	Aging (Albany NY)	2017	27/10/2017	PMC5680547		10.18632/aging.101311
29056530	The effect of combined diet and exercise intervention on body weight and the serum GPIHBP1 concentration in overweight/obese middle-aged women	Aruga M, Tokita Y, Nakajima K, Kamachi K, Tanaka A.	Clin Chim Acta. 2017 Dec;475:109-115. doi: 10.1016/j.cca.2017.10.017. Epub 2017 Oct 19.	Aruga M	Clin Chim Acta	2017	24/10/2017			10.1016/j.cca.2017.10.017
29053861	Physical Function Following a Long-Term Lifestyle Intervention Among Middle Aged and Older Adults With Type 2 Diabetes: The Look AHEAD Study	Houston DK, Neiberg RH, Miller ME, Hill JO, Jakicic JM, Johnson KC, Gregg EW, Hubbard VS, Pi-Sunyer X, Rejeski WJ, Wing RR, Bantle JP, Beale E, Berkowitz RI, Cassidy-Begay M, Clark JM, Coday M, Delahanty LM, Dutton G, Egan C, Foreyt JP, Greenway FL, Hazuda HP, Hergenroeder A, Horton ES, Jeffery RW, Kahn SE, Kure A, Knowler WC, Lewis CE, Martin CK, Michaels S, Montez MG, Nathan DM, Patricio J, Pet…	J Gerontol A Biol Sci Med Sci. 2018 Oct 8;73(11):1552-1559. doi: 10.1093/gerona/glx204.	Houston DK	J Gerontol A Biol Sci Med Sci	2018	21/10/2017	PMC6175031		10.1093/gerona/glx204
29053575	The Impact of a Weight Loss Intervention on Diet Quality and Eating Behaviours in People with Obesity and COPD	McLoughlin RF, McDonald VM, Gibson PG, Scott HA, Hensley MJ, MacDonald-Wicks L, Wood LG.	Nutrients. 2017 Oct 20;9(10):1147. doi: 10.3390/nu9101147.	McLoughlin RF	Nutrients	2017	21/10/2017	PMC5691763		10.3390/nu9101147
29045325	Effects of Two Years of Calorie Restriction on Aerobic Capacity and Muscle Strength	Racette SB, Rochon J, Uhrich ML, Villareal DT, DAS SK, Fontana L, Bhapkar M, Martin CK, Redman LM, Fuss PJ, Roberts SB, Kraus WE.	Med Sci Sports Exerc. 2017 Nov;49(11):2240-2249. doi: 10.1249/MSS.0000000000001353.	Racette SB	Med Sci Sports Exerc	2017	19/10/2017	PMC5647115	NIHMS885693	10.1249/MSS.0000000000001353
29039967	Central obesity and the Mediterranean diet: A systematic review of intervention trials	Bendall CL, Mayr HL, Opie RS, Bes-Rastrollo M, Itsiopoulos C, Thomas CJ.	Crit Rev Food Sci Nutr. 2018;58(18):3070-3084. doi: 10.1080/10408398.2017.1351917. Epub 2017 Oct 17.	Bendall CL	Crit Rev Food Sci Nutr	2018	18/10/2017			10.1080/10408398.2017.1351917
29038285	Metabolic Effects of Diet and Exercise in Patients with Moderate to Severe CKD: A Randomized Clinical Trial	Ikizler TA, Robinson-Cohen C, Ellis C, Headley SAE, Tuttle K, Wood RJ, Evans EE, Milch CM, Moody KA, Germain M, Limkunakul C, Bian A, Stewart TG, Himmelfarb J.	J Am Soc Nephrol. 2018 Jan;29(1):250-259. doi: 10.1681/ASN.2017010020. Epub 2017 Oct 16.	Ikizler TA	J Am Soc Nephrol	2018	18/10/2017	PMC5748901		10.1681/ASN.2017010020
29029202	A Metabolomic Signature of Acute Caloric Restriction	Collet TH, Sonoyama T, Henning E, Keogh JM, Ingram B, Kelway S, Guo L, Farooqi IS.	J Clin Endocrinol Metab. 2017 Dec 1;102(12):4486-4495. doi: 10.1210/jc.2017-01020.	Collet TH	J Clin Endocrinol Metab	2017	14/10/2017	PMC5718701		10.1210/jc.2017-01020
29022288	Comparing the effectiveness of general dietary advice versus a very low energy diet in an obese outpatient population in Australia	Venchiarutti RL, Byth K, Marks JL, Chand A, Blumenthal CS.	Eat Weight Disord. 2019 Aug;24(4):739-747. doi: 10.1007/s40519-017-0443-4. Epub 2017 Oct 11.	Venchiarutti RL	Eat Weight Disord	2019	13/10/2017			10.1007/s40519-017-0443-4
29024341	Modulation of Human Subcutaneous Adipose Tissue MicroRNA Profile Associated with Changes in Adiposity-Related Parameters	Giardina S, Hernández-Alonso P, Salas-Salvadó J, Rabassa-Soler A, Bulló M.	Mol Nutr Food Res. 2018 Jan;62(2). doi: 10.1002/mnfr.201700594. Epub 2017 Dec 11.	Giardina S	Mol Nutr Food Res	2018	13/10/2017			10.1002/mnfr.201700594
28970185	When does behavior follow intent? Relationships between trait level dietary restraint and daily eating behaviors	Rodgers RF, Fuller-Tyszkiewicz M, Holmes M, Skouteris H, Broadbent J.	Appetite. 2018 Jan 1;120:449-455. doi: 10.1016/j.appet.2017.09.030. Epub 2017 Sep 29.	Rodgers RF	Appetite	2018	2017-04-10			10.1016/j.appet.2017.09.030
28958900	Effects of 3-week total meal replacement vs. typical food-based diet on human brain functional magnetic resonance imaging food-cue reactivity and functional connectivity in people with obesity	Kahathuduwa CN, Davis T, O'Boyle M, Boyd LA, Chin SH, Paniukov D, Binks M.	Appetite. 2018 Jan 1;120:431-441. doi: 10.1016/j.appet.2017.09.025. Epub 2017 Sep 25.	Kahathuduwa CN	Appetite	2018	30/09/2017			10.1016/j.appet.2017.09.025
28958691	Branched-chain amino acid catabolism rather than amino acids plasma concentrations is associated with diet-induced changes in insulin resistance in overweight to obese individuals	Haufe S, Engeli S, Kaminski J, Witt H, Rein D, Kamlage B, Utz W, Fuhrmann JC, Haas V, Mähler A, Schulz-Menger J, Luft FC, Boschmann M, Jordan J.	Nutr Metab Cardiovasc Dis. 2017 Oct;27(10):858-864. doi: 10.1016/j.numecd.2017.07.001. Epub 2017 Jul 11.	Haufe S	Nutr Metab Cardiovasc Dis	2017	30/09/2017			10.1016/j.numecd.2017.07.001
28953225	Explicit and Implicit Approach vs. Avoidance Tendencies towards High vs. Low Calorie Food Cues in Patients with Obesity and Active Binge Eating Disorder	Paslakis G, Kühn S, Grunert S, Erim Y.	Nutrients. 2017 Sep 27;9(10):1068. doi: 10.3390/nu9101068.	Paslakis G	Nutrients	2017	28/09/2017	PMC5691685		10.3390/nu9101068
28944597	Caloric Restriction-Induced Decreases in Dopamine Receptor Availability are Associated with Leptin Concentration	Dunn JP, Abumrad NN, Kessler RM, Patterson BW, Li R, Marks-Shulman P, Tamboli RA.	Obesity (Silver Spring). 2017 Nov;25(11):1910-1915. doi: 10.1002/oby.22023. Epub 2017 Sep 25.	Dunn JP	Obesity (Silver Spring)	2017	26/09/2017	PMC5718041	NIHMS902461	10.1002/oby.22023
28938493	Acute and Chronic Impact of Bariatric Surgery on Plasma LDL Cholesterol and PCSK9 Levels in Patients With Severe Obesity	Boyer M, Piché ME, Auclair A, Grenier-Larouche T, Biertho L, Marceau S, Hould FS, Biron S, Lebel S, Lescelleur O, Julien F, Martin J, Tchernof A, Carpentier AC, Poirier P, Arsenault BJ.	J Clin Endocrinol Metab. 2017 Nov 1;102(11):4023-4030. doi: 10.1210/jc.2017-00699.	Boyer M	J Clin Endocrinol Metab	2017	23/09/2017			10.1210/jc.2017-00699
28931850	Effect of caloric restriction on gut permeability, inflammation markers, and fecal microbiota in obese women	Ott B, Skurk T, Hastreiter L, Lagkouvardos I, Fischer S, Büttner J, Kellerer T, Clavel T, Rychlik M, Haller D, Hauner H.	Sci Rep. 2017 Sep 20;7(1):11955. doi: 10.1038/s41598-017-12109-9.	Ott B	Sci Rep	2017	22/09/2017	PMC5607294		10.1038/s41598-017-12109-9
28923378	Malaria Parasites in a Hungry Host: Kinases and Host Caloric Restriction Brought Together	Garcia-Bustos JF, Doerig C.	Trends Parasitol. 2017 Nov;33(11):831-832. doi: 10.1016/j.pt.2017.08.007. Epub 2017 Sep 8.	Garcia-Bustos JF	Trends Parasitol	2017	20/09/2017			10.1016/j.pt.2017.08.007
28925405	Intermittent energy restriction improves weight loss efficiency in obese men: the MATADOR study	Byrne NM, Sainsbury A, King NA, Hills AP, Wood RE.	Int J Obes (Lond). 2018 Feb;42(2):129-138. doi: 10.1038/ijo.2017.206. Epub 2017 Aug 17.	Byrne NM	Int J Obes (Lond)	2018	20/09/2017	PMC5803575		10.1038/ijo.2017.206
28922017	Effects of Chronic and Intermittent Calorie Restriction on Adropin Levels in Breast Cancer	Tuna BG, Atalay PB, Altunbek M, Kalkan BM, Dogan S.	Nutr Cancer. 2017 Oct;69(7):1003-1010. doi: 10.1080/01635581.2017.1359314. Epub 2017 Sep 18.	Tuna BG	Nutr Cancer	2017	19/09/2017			10.1080/01635581.2017.1359314
28921841	In a randomized trial in prostate cancer patients, dietary protein restriction modifies markers of leptin and insulin signaling in plasma extracellular vesicles	Eitan E, Tosti V, Suire CN, Cava E, Berkowitz S, Bertozzi B, Raefsky SM, Veronese N, Spangler R, Spelta F, Mustapic M, Kapogiannis D, Mattson MP, Fontana L.	Aging Cell. 2017 Dec;16(6):1430-1433. doi: 10.1111/acel.12657. Epub 2017 Sep 17.	Eitan E	Aging Cell	2017	19/09/2017	PMC5676054		10.1111/acel.12657
28914421	Acid-base safety during the course of a very low-calorie-ketogenic diet	Gomez-Arbelaez D, Crujeiras AB, Castro AI, Goday A, Mas-Lorenzo A, Bellon A, Tejera C, Bellido D, Galban C, Sajoux I, Lopez-Jaramillo P, Casanueva FF.	Endocrine. 2017 Oct;58(1):81-90. doi: 10.1007/s12020-017-1405-3. Epub 2017 Sep 15.	Gomez-Arbelaez D	Endocrine	2017	16/09/2017	PMC5608861		10.1007/s12020-017-1405-3
28912502	Caloric restriction delays age-related methylation drift	Maegawa S, Lu Y, Tahara T, Lee JT, Madzo J, Liang S, Jelinek J, Colman RJ, Issa JJ.	Nat Commun. 2017 Sep 14;8(1):539. doi: 10.1038/s41467-017-00607-3.	Maegawa S	Nat Commun	2017	16/09/2017	PMC5599616		10.1038/s41467-017-00607-3
28899879	Pronounced energy restriction with elevated protein intake results in no change in proteolysis and reductions in skeletal muscle protein synthesis that are mitigated by resistance exercise	Hector AJ, McGlory C, Damas F, Mazara N, Baker SK, Phillips SM.	FASEB J. 2018 Jan;32(1):265-275. doi: 10.1096/fj.201700158RR. Epub 2017 Sep 12.	Hector AJ	FASEB J	2018	14/09/2017			10.1096/fj.201700158RR
28888245	Metabolic adventures in aging research	Brown-Borg HM, Anderson RM.	Mol Cell Endocrinol. 2017 Nov 5;455:1-3. doi: 10.1016/j.mce.2017.08.012.	Brown-Borg HM	Mol Cell Endocrinol	2017	2017-11-09	PMC8183874	NIHMS1573241	10.1016/j.mce.2017.08.012
28884735	[The spa and health resort-based treatment of metabolic syndrome with the application of the therapeutic courses of different duration: the evaluation according long-term results]	Chalaya EN, Botvineva LA, Tsallagova LV, Ahkubekova NK, Efimenko NV, Kaysinova AS, Amiyants VY, Vasin VA.	Vopr Kurortol Fizioter Lech Fiz Kult. 2017;94(3):27-31. doi: 10.17116/kurort201794327-31.	Chalaya EN	Vopr Kurortol Fizioter Lech Fiz Kult	2017	2017-09-09			10.17116/kurort201794327-31
28878175	Modelled Cost-Effectiveness of a Package Size Cap and a Kilojoule Reduction Intervention to Reduce Energy Intake from Sugar-Sweetened Beverages in Australia	Crino M, Herrera AMM, Ananthapavan J, Wu JHY, Neal B, Lee YY, Zheng M, Lal A, Sacks G.	Nutrients. 2017 Sep 6;9(9):983. doi: 10.3390/nu9090983.	Crino M	Nutrients	2017	2017-08-09	PMC5622743		10.3390/nu9090983
28881355	Presurgical weight loss affects tumour traits and circulating biomarkers in men with prostate cancer	Demark-Wahnefried W, Rais-Bahrami S, Desmond RA, Gordetsky JB, Hunter GR, Yang ES, Azrad M, Frugé AD, Tsuruta Y, Norian LA, Segal R, Grizzle WE.	Br J Cancer. 2017 Oct 24;117(9):1303-1313. doi: 10.1038/bjc.2017.303. Epub 2017 Sep 7.	Demark-Wahnefried W	Br J Cancer	2017	2017-08-09	PMC5672928		10.1038/bjc.2017.303
28875685	[Anti-aging traditional Chinese medicine： potential mechanisms involving AMPK pathway and calorie restriction based on "medicine-food homology" theory]	Liu DY, Li YH, Xu YT, Zhu Y.	Zhongguo Zhong Yao Za Zhi. 2016 Mar;41(6):1144-1151. doi: 10.4268/cjcmm20160629.	Liu DY	Zhongguo Zhong Yao Za Zhi	2016	2017-07-09			10.4268/cjcmm20160629
28866139	Impact of caloric intake in critically ill patients with, and without, refeeding syndrome: A retrospective study	Olthof LE, Koekkoek WACK, van Setten C, Kars JCN, van Blokland D, van Zanten ARH.	Clin Nutr. 2018 Oct;37(5):1609-1617. doi: 10.1016/j.clnu.2017.08.001. Epub 2017 Aug 10.	Olthof LE	Clin Nutr	2018	2017-04-09			10.1016/j.clnu.2017.08.001
28865109	Effects of Moxonidine and Low-Calorie Diet: Cardiometabolic Benefits from Combination of Both Therapies	Lambert EA, Sari CI, Eikelis N, Phillips SE, Grima M, Straznicky NE, Dixon JB, Esler M, Schlaich MP, Head GA, Lambert GW.	Obesity (Silver Spring). 2017 Nov;25(11):1894-1902. doi: 10.1002/oby.21962. Epub 2017 Sep 2.	Lambert EA	Obesity (Silver Spring)	2017	2017-03-09			10.1002/oby.21962
28859084	Regulation of myoblast differentiation by metabolic perturbations induced by metformin	Pavlidou T, Rosina M, Fuoco C, Gerini G, Gargioli C, Castagnoli L, Cesareni G.	PLoS One. 2017 Aug 31;12(8):e0182475. doi: 10.1371/journal.pone.0182475. eCollection 2017.	Pavlidou T	PLoS One	2017	2017-01-09	PMC5578649		10.1371/journal.pone.0182475
28853436	Small nucleoli are a cellular hallmark of longevity	Tiku V, Jain C, Raz Y, Nakamura S, Heestand B, Liu W, Späth M, Suchiman HED, Müller RU, Slagboom PE, Partridge L, Antebi A.	Nat Commun. 2017 Aug 30;8:16083. doi: 10.1038/ncomms16083.	Tiku V	Nat Commun	2017	31/08/2017	PMC5582349		10.1038/ncomms16083
28847734	Improvement in the Spatial Distribution of Pain, Somatic Symptoms, and Depression After a Weight Loss Intervention	Schrepf A, Harte SE, Miller N, Fowler C, Nay C, Williams DA, Clauw DJ, Rothberg A.	J Pain. 2017 Dec;18(12):1542-1550. doi: 10.1016/j.jpain.2017.08.004. Epub 2017 Aug 25.	Schrepf A	J Pain	2017	30/08/2017	PMC5841588	NIHMS912520	10.1016/j.jpain.2017.08.004
28837084	Consumption of Low-Calorie Sweetened Beverages Compared to Water Is Associated with Reduced Intake of Carbohydrates and Sugar, with No Adverse Relationships to Glycemic Responses: Results from the 2001-2012 National Health and Nutrition Examination Surveys	Leahy M, Ratliff JC, Riedt CS, Fulgoni VL.	Nutrients. 2017 Aug 24;9(9):928. doi: 10.3390/nu9090928.	Leahy M	Nutrients	2017	25/08/2017	PMC5622688		10.3390/nu9090928
28829923	High intake of dairy during energy restriction does not affect energy balance or the intestinal microflora compared with low dairy intake in overweight individuals in a randomized controlled trial	Bendtsen LQ, Blædel T, Holm JB, Lorenzen JK, Mark AB, Kiilerich P, Kristiansen K, Astrup A, Larsen LH.	Appl Physiol Nutr Metab. 2018 Jan;43(1):1-10. doi: 10.1139/apnm-2017-0234. Epub 2017 Aug 22.	Bendtsen LQ	Appl Physiol Nutr Metab	2018	23/08/2017			10.1139/apnm-2017-0234
28827381	Promotion of Healthy Weight-Control Practices in Young Athletes	Carl RL, Johnson MD, Martin TJ; COUNCIL ON SPORTS MEDICINE AND FITNESS.	Pediatrics. 2017 Sep;140(3):e20171871. doi: 10.1542/peds.2017-1871. Epub 2017 Aug 21.	Carl RL	Pediatrics	2017	23/08/2017			10.1542/peds.2017-1871
28823380	The science of nutritional modulation of aging	Fontana L.	Ageing Res Rev. 2017 Oct;39:1-2. doi: 10.1016/j.arr.2017.08.002.	Fontana L	Ageing Res Rev	2017	22/08/2017			10.1016/j.arr.2017.08.002
28810024	Effect of an Intensive Lifestyle Intervention on Glycemic Control in Patients With Type 2 Diabetes: A Randomized Clinical Trial	Johansen MY, MacDonald CS, Hansen KB, Karstoft K, Christensen R, Pedersen M, Hansen LS, Zacho M, Wedell-Neergaard AS, Nielsen ST, Iepsen UW, Langberg H, Vaag AA, Pedersen BK, Ried-Larsen M.	JAMA. 2017 Aug 15;318(7):637-646. doi: 10.1001/jama.2017.10169.	Johansen MY	JAMA	2017	16/08/2017	PMC5817591		10.1001/jama.2017.10169
28793995	Transcriptome profiling from adipose tissue during a low-calorie diet reveals predictors of weight and glycemic outcomes in obese, nondiabetic subjects	Armenise C, Lefebvre G, Carayol J, Bonnel S, Bolton J, Di Cara A, Gheldof N, Descombes P, Langin D, Saris WH, Astrup A, Hager J, Viguerie N, Valsesia A.	Am J Clin Nutr. 2017 Sep;106(3):736-746. doi: 10.3945/ajcn.117.156216. Epub 2017 Aug 9.	Armenise C	Am J Clin Nutr	2017	2017-11-08			10.3945/ajcn.117.156216
28791787	Is two days of intermittent energy restriction per week a feasible weight loss approach in obese males? A randomised pilot study	Conley M, Le Fevre L, Haywood C, Proietto J.	Nutr Diet. 2018 Feb;75(1):65-72. doi: 10.1111/1747-0080.12372. Epub 2017 Aug 9.	Conley M	Nutr Diet	2018	2017-10-08			10.1111/1747-0080.12372
28791889	Symbiotic Origin of Aging	Greenberg EF, Vatolin S.	Rejuvenation Res. 2018 Jun;21(3):225-231. doi: 10.1089/rej.2017.1973. Epub 2017 Sep 25.	Greenberg EF	Rejuvenation Res	2018	2017-10-08			10.1089/rej.2017.1973
28779908	Differential effects of voluntary treadmill exercise and caloric restriction on tau pathogenesis in a mouse model of Alzheimer's disease-like tau pathology fed with Western diet	Gratuze M, Julien J, Morin F, Marette A, Planel E.	Prog Neuropsychopharmacol Biol Psychiatry. 2017 Oct 3;79(Pt B):452-461. doi: 10.1016/j.pnpbp.2017.08.001. Epub 2017 Aug 3.	Gratuze M	Prog Neuropsychopharmacol Biol Psychiatry	2017	2017-07-08			10.1016/j.pnpbp.2017.08.001
28778976	Influence of intergenerational in utero parental energy and nutrient restriction on offspring growth in rural Gambia	Eriksen KG, Radford EJ, Silver MJ, Fulford AJC, Wegmüller R, Prentice AM.	FASEB J. 2017 Nov;31(11):4928-4934. doi: 10.1096/fj.201700017R. Epub 2017 Aug 4.	Eriksen KG	FASEB J	2017	2017-06-08	PMC5636699		10.1096/fj.201700017R
28777921	Minimal alteration in muscle lipid genes following stabilized weight loss	Coker RH, Robinette L, Kern PA.	Appl Physiol Nutr Metab. 2017 Dec;42(12):1277-1282. doi: 10.1139/apnm-2017-0098. Epub 2017 Aug 4.	Coker RH	Appl Physiol Nutr Metab	2017	2017-05-08			10.1139/apnm-2017-0098
28770437	Comparing the Effects of Melatonin with Caloric Restriction in the Hippocampus of Aging Mice: Involvement of Sirtuin1 and the FOXOs Pathway	Jenwitheesuk A, Park S, Wongchitrat P, Tocharus J, Mukda S, Shimokawa I, Govitrapong P.	Neurochem Res. 2018 Jan;43(1):153-161. doi: 10.1007/s11064-017-2369-7. Epub 2017 Aug 2.	Jenwitheesuk A	Neurochem Res	2018	2017-04-08			10.1007/s11064-017-2369-7
28768569	Tissue cell stress response to obesity and its interaction with late gestation diet	Saroha V, Dellschaft NS, Keisler DH, Gardner DS, Budge H, Sebert SP, Symonds ME.	Reprod Fertil Dev. 2018 Mar;30(3):430-441. doi: 10.1071/RD16494.	Saroha V	Reprod Fertil Dev	2018	2017-04-08			10.1071/RD16494
28765272	"Calories in, calories out" and macronutrient intake: the hope, hype, and science of calories	Howell S, Kones R.	Am J Physiol Endocrinol Metab. 2017 Nov 1;313(5):E608-E612. doi: 10.1152/ajpendo.00156.2017. Epub 2017 Aug 1.	Howell S	Am J Physiol Endocrinol Metab	2017	2017-03-08			10.1152/ajpendo.00156.2017
28758840	I'd rather die happy': residents' experiences with food regulations, risk and food choice in residential aged care. A qualitative study	Bailey A, Bailey S, Bernoth M.	Contemp Nurse. 2017 Dec;53(6):597-606. doi: 10.1080/10376178.2017.1361334. Epub 2017 Aug 9.	Bailey A	Contemp Nurse	2017	2017-01-08			10.1080/10376178.2017.1361334
28759939	Effects of a Low-Calorie, Low-Carbohydrate Soy Containing Diet on Systemic Inflammation Among Patients with Nonalcoholic Fatty Liver Disease: A Parallel Randomized Clinical Trial	Kani AH, Alavian SM, Esmaillzadeh A, Adibi P, Haghighatdoost F, Azadbakht L.	Horm Metab Res. 2017 Sep;49(9):687-692. doi: 10.1055/s-0042-118707. Epub 2017 Jul 31.	Kani AH	Horm Metab Res	2017	2017-01-08			10.1055/s-0042-118707
28747328	Long-term weight-loss maintenance in obese patients with knee osteoarthritis: a randomized trial	Christensen P, Henriksen M, Bartels EM, Leeds AR, Meinert Larsen T, Gudbergsen H, Riecke BF, Astrup A, Heitmann BL, Boesen M, Christensen R, Bliddal H.	Am J Clin Nutr. 2017 Sep;106(3):755-763. doi: 10.3945/ajcn.117.158543. Epub 2017 Jul 26.	Christensen P	Am J Clin Nutr	2017	28/07/2017			10.3945/ajcn.117.158543
28729389	Severe energy deficit upregulates leptin receptors, leptin signaling, and PTP1B in human skeletal muscle	Perez-Suarez I, Ponce-González JG, de La Calle-Herrero J, Losa-Reyna J, Martin-Rincon M, Morales-Alamo D, Santana A, Holmberg HC, Calbet JAL.	J Appl Physiol (1985). 2017 Nov 1;123(5):1276-1287. doi: 10.1152/japplphysiol.00454.2017. Epub 2017 Jul 20.	Perez-Suarez I	J Appl Physiol (1985)	2017	22/07/2017			10.1152/japplphysiol.00454.2017
28730835	The effect of very-low-calorie diet on mitochondrial dysfunction in subcutaneous adipose tissue and peripheral monocytes of obese subjects with type 2 diabetes mellitus	Urbanová M, Mráz M, Ďurovcová V, Trachta P, Kloučková J, Kaválková P, Haluzíková D, Lacinová Z, Hansíková H, Wenchich L, Kršek M, Haluzík M.	Physiol Res. 2017 Nov 24;66(5):811-822. doi: 10.33549/physiolres.933469. Epub 2017 Jul 18.	Urbanová M	Physiol Res	2017	22/07/2017			10.33549/physiolres.933469
28727247	Acceptability of a very-low-energy diet in Type 2 diabetes: patient experiences and behaviour regulation	Rehackova L, Araújo-Soares V, Adamson AJ, Steven S, Taylor R, Sniehotta FF.	Diabet Med. 2017 Nov;34(11):1554-1567. doi: 10.1111/dme.13426. Epub 2017 Aug 15.	Rehackova L	Diabet Med	2017	21/07/2017	PMC5656912		10.1111/dme.13426
28718974	Pre-pubertal diet restriction reduces reactive oxygen species and restores fertility in male WNIN/Obese rat	Dinesh Yadav DM, Muralidhar MN, Prasad SMVK, Rajender Rao K.	Andrologia. 2018 Mar;50(2). doi: 10.1111/and.12849. Epub 2017 Jul 18.	Dinesh Yadav DM	Andrologia	2018	19/07/2017			10.1111/and.12849
28693601	Effects of the "plate model" as part of dietary intervention on modification of selected cardiometabolic risk factors in post-myocardial infarction patients: study protocol for a randomized controlled trial	Jayawardena R, Fernando P, Lokunarangoda N, Pathirana AK.	Trials. 2017 Jul 10;18(1):314. doi: 10.1186/s13063-017-2057-6.	Jayawardena R	Trials	2017	2017-12-07	PMC5504753		10.1186/s13063-017-2057-6
28677323	Caloric restriction impacts plasma microRNAs in rhesus monkeys	Schneider A, Dhahbi JM, Atamna H, Clark JP, Colman RJ, Anderson RM.	Aging Cell. 2017 Oct;16(5):1200-1203. doi: 10.1111/acel.12636. Epub 2017 Jul 5.	Schneider A	Aging Cell	2017	2017-06-07	PMC5595684		10.1111/acel.12636
28671558	Brain Functional Connectivity Is Modified by a Hypocaloric Mediterranean Diet and Physical Activity in Obese Women	García-Casares N, Bernal-López MR, Roé-Vellvé N, Gutiérrez-Bedmar M, Fernández-García JC, García-Arnés JA, Ramos-Rodriguez JR, Alfaro F, Santamaria-Fernández S, Steward T, Jiménez-Murcia S, Garcia-Garcia I, Valdivielso P, Fernández-Aranda F, Tinahones FJ, Gómez-Huelgas R.	Nutrients. 2017 Jul 1;9(7):685. doi: 10.3390/nu9070685.	García-Casares N	Nutrients	2017	2017-04-07	PMC5537800		10.3390/nu9070685
28659285	Upregulation of circulating myomiR following short-term energy restriction is inversely associated with whole body protein synthesis	Margolis LM, Rivas DA, Pasiakos SM, McClung JP, Ceglia L, Fielding RA.	Am J Physiol Regul Integr Comp Physiol. 2017 Sep 1;313(3):R298-R304. doi: 10.1152/ajpregu.00054.2017. Epub 2017 Jun 28.	Margolis LM	Am J Physiol Regul Integr Comp Physiol	2017	30/06/2017	PMC5625273		10.1152/ajpregu.00054.2017
28660652	Change in Use of Sleep Medications After Gastric Bypass Surgery or Intensive Lifestyle Treatment in Adults with Obesity	Ng WL, Peeters A, Näslund I, Ottosson J, Johansson K, Marcus C, Shaw JE, Bruze G, Sundström J, Neovius M.	Obesity (Silver Spring). 2017 Aug;25(8):1451-1459. doi: 10.1002/oby.21908. Epub 2017 Jun 29.	Ng WL	Obesity (Silver Spring)	2017	30/06/2017	PMC5533175	NIHMS880771	10.1002/oby.21908
28658942	Cellular Senescence Biomarker p16INK4a+ Cell Burden in Thigh Adipose is Associated With Poor Physical Function in Older Women	Justice JN, Gregory H, Tchkonia T, LeBrasseur NK, Kirkland JL, Kritchevsky SB, Nicklas BJ.	J Gerontol A Biol Sci Med Sci. 2018 Jun 14;73(7):939-945. doi: 10.1093/gerona/glx134.	Justice JN	J Gerontol A Biol Sci Med Sci	2018	30/06/2017	PMC6001887		10.1093/gerona/glx134
28658487	Can a Diet That Mimics Fasting Turn Back the Clock?	Abbasi J.	JAMA. 2017 Jul 18;318(3):227-229. doi: 10.1001/jama.2017.6648.	Abbasi J	JAMA	2017	29/06/2017			10.1001/jama.2017.6648
28658346	Effects of energetic restriction diet on butyrylcholinesterase in obese women from southern Brazil - A longitudinal study	Santos WD, Tureck LV, Saliba LF, Schenknecht CS, Scaraboto D, Souza RLR, Furtado-Alle L.	Arch Endocrinol Metab. 2017 Sept-Oct;61(5):484-489. doi: 10.1590/2359-3997000000268. Epub 2017 Jun 26.	Santos WD	Arch Endocrinol Metab	2017	29/06/2017			10.1590/2359-3997000000268
28657604	Fruit Fiber Consumption Specifically Improves Liver Health Status in Obese Subjects under Energy Restriction	Cantero I, Abete I, Monreal JI, Martinez JA, Zulet MA.	Nutrients. 2017 Jun 28;9(7):667. doi: 10.3390/nu9070667.	Cantero I	Nutrients	2017	29/06/2017	PMC5537782		10.3390/nu9070667
28639346	Adipose Tissue Meal-Derived Fatty Acid Uptake Before and After Diet-Induced Weight Loss in Adults with Overweight and Obesity	Vink RG, Roumans NJ, van der Kolk BW, Fazelzadeh P, Boekschoten MV, Mariman EC, van Baak MA.	Obesity (Silver Spring). 2017 Aug;25(8):1391-1399. doi: 10.1002/oby.21903. Epub 2017 Jun 22.	Vink RG	Obesity (Silver Spring)	2017	23/06/2017			10.1002/oby.21903
28625745	Lifelong dietary intervention does not affect hematopoietic stem cell function	Lazare S, Ausema A, Reijne AC, van Dijk G, van Os R, de Haan G.	Exp Hematol. 2017 Sep;53:26-30. doi: 10.1016/j.exphem.2017.06.002. Epub 2017 Jun 16.	Lazare S	Exp Hematol	2017	20/06/2017			10.1016/j.exphem.2017.06.002
28627208	Irisin is weakly associated with usual physical activity in young overweight women	Tenorio B, Jiménez T, Barrera G, Hirsch S, De la Maza MP, Troncoso R, Farias MB, Rodríguez JM, Bunout D.	Nutr Hosp. 2017 Jun 5;34(3):688-692. doi: 10.20960/nh.463.	Tenorio B	Nutr Hosp	2017	20/06/2017			10.20960/nh.463
28619945	Transcriptional activation of RagD GTPase controls mTORC1 and promotes cancer growth	Di Malta C, Siciliano D, Calcagni A, Monfregola J, Punzi S, Pastore N, Eastes AN, Davis O, De Cegli R, Zampelli A, Di Giovannantonio LG, Nusco E, Platt N, Guida A, Ogmundsdottir MH, Lanfrancone L, Perera RM, Zoncu R, Pelicci PG, Settembre C, Ballabio A.	Science. 2017 Jun 16;356(6343):1188-1192. doi: 10.1126/science.aag2553.	Di Malta C	Science	2017	17/06/2017	PMC5730647	NIHMS922943	10.1126/science.aag2553
28604251	The Effect of a Vegetarian vs Conventional Hypocaloric Diabetic Diet on Thigh Adipose Tissue Distribution in Subjects with Type 2 Diabetes: A Randomized Study	Kahleova H, Klementova M, Herynek V, Skoch A, Herynek S, Hill M, Mari A, Pelikanova T.	J Am Coll Nutr. 2017 Jul;36(5):364-369. doi: 10.1080/07315724.2017.1302367. Epub 2017 Jun 10.	Kahleova H	J Am Coll Nutr	2017	13/06/2017			10.1080/07315724.2017.1302367
28604374	A very low calorie ketogenic diet improves weight loss and quality of life in patients with adjustable gastric banding	Taus M, Fumelli D, Busni D, Borroni F, Sebastianelli S, Nicolai G, Nicolai A.	Ann Ital Chir. 2017;88:S0003469X17026550.	Taus M	Ann Ital Chir	2017	13/06/2017
28600159	Building research in diet and cognition: The BRIDGE randomized controlled trial	Tussing-Humphreys L, Lamar M, Blumenthal JA, Babyak M, Fantuzzi G, Blumstein L, Schiffer L, Fitzgibbon ML.	Contemp Clin Trials. 2017 Aug;59:87-97. doi: 10.1016/j.cct.2017.06.003. Epub 2017 Jun 7.	Tussing-Humphreys L	Contemp Clin Trials	2017	2017-11-06	PMC7289155	NIHMS1589031	10.1016/j.cct.2017.06.003
28600158	Lorcaserin plus lifestyle modification for weight loss maintenance: Rationale and design for a randomized controlled trial	Tronieri JS, Alfaris N, Chao AM, Pearl RL, Alamuddin N, Bakizada ZM, Berkowitz RI, Wadden TA.	Contemp Clin Trials. 2017 Aug;59:105-112. doi: 10.1016/j.cct.2017.06.004. Epub 2017 Jun 16.	Tronieri JS	Contemp Clin Trials	2017	2017-11-06			10.1016/j.cct.2017.06.004
28600119	Effects on Diabetes Medications, Weight and Glycated Hemoglobin Among Adult Patients With Obesity and Type 2 Diabetes: 6-Month Observations From a Full Meal Replacement, Low-Calorie Diet Weight Management Program	Shiau JY, So DYF, Dent RR.	Can J Diabetes. 2018 Feb;42(1):56-60. doi: 10.1016/j.jcjd.2017.03.006. Epub 2017 Jun 7.	Shiau JY	Can J Diabetes	2018	2017-11-06			10.1016/j.jcjd.2017.03.006
28598229	Autophagy in natural and therapy-driven anticancer immunosurveillance	Pietrocola F, Bravo-San Pedro JM, Galluzzi L, Kroemer G.	Autophagy. 2017;13(12):2163-2170. doi: 10.1080/15548627.2017.1310356. Epub 2017 Jul 26.	Pietrocola F	Autophagy	2017	2017-10-06	PMC5788556		10.1080/15548627.2017.1310356
28596381	A dual agonist of farnesoid X receptor (FXR) and the G protein-coupled receptor TGR5, INT-767, reverses age-related kidney disease in mice	Wang XX, Luo Y, Wang D, Adorini L, Pruzanski M, Dobrinskikh E, Levi M.	J Biol Chem. 2017 Jul 21;292(29):12018-12024. doi: 10.1074/jbc.C117.794982. Epub 2017 Jun 8.	Wang XX	J Biol Chem	2017	2017-10-06	PMC5519354		10.1074/jbc.C117.794982
28588304	Plasma FGF21 levels in obese patients undergoing energy-restricted diets or bariatric surgery: a marker of metabolic stress?	Crujeiras AB, Gomez-Arbelaez D, Zulet MA, Carreira MC, Sajoux I, de Luis D, Castro AI, Baltar J, Baamonde I, Sueiro A, Macias-Gonzalez M, Bellido D, Tinahones FJ, Martinez JA, Casanueva FF.	Int J Obes (Lond). 2017 Oct;41(10):1570-1578. doi: 10.1038/ijo.2017.138. Epub 2017 Jun 7.	Crujeiras AB	Int J Obes (Lond)	2017	2017-08-06			10.1038/ijo.2017.138
28561039	Sedentary behavior and compensatory mechanisms in response to different doses of exercise-a randomized controlled trial in overweight and obese adults	Castro EA, Júdice PB, Silva AM, Teixeira PJ, Benito PJ.	Eur J Clin Nutr. 2017 Dec;71(12):1393-1398. doi: 10.1038/ejcn.2017.84. Epub 2017 May 31.	Castro EA	Eur J Clin Nutr	2017	2017-01-06			10.1038/ejcn.2017.84
28545315	Relationship between sleep pattern and efficacy of calorie-restricted Mediterranean diet in overweight/obese subjects	Pagliai G, Dinu M, Casini A, Sofi F.	Int J Food Sci Nutr. 2018 Feb;69(1):93-99. doi: 10.1080/09637486.2017.1330405. Epub 2017 May 25.	Pagliai G	Int J Food Sci Nutr	2018	27/05/2017			10.1080/09637486.2017.1330405
28537652	Efficacy and safety of very-low-calorie ketogenic diet: a double blind randomized crossover study	Colica C, Merra G, Gasbarrini A, De Lorenzo A, Cioccoloni G, Gualtieri P, Perrone MA, Bernardini S, Bernardo V, Di Renzo L, Marchetti M.	Eur Rev Med Pharmacol Sci. 2017 May;21(9):2274-2289.	Colica C	Eur Rev Med Pharmacol Sci	2017	25/05/2017
28537332	Comparison of Intermittent Fasting Versus Caloric Restriction in Obese Subjects: A Two Year Follow-Up	Aksungar FB, Sarıkaya M, Coskun A, Serteser M, Unsal I.	J Nutr Health Aging. 2017;21(6):681-685. doi: 10.1007/s12603-016-0786-y.	Aksungar FB	J Nutr Health Aging	2017	25/05/2017			10.1007/s12603-016-0786-y
28535183	Time-caloric restriction inhibits the neoplastic transformation of cirrhotic liver in rats treated with diethylnitrosamine	Molina-Aguilar C, Guerrero-Carrillo MJ, Espinosa-Aguirre JJ, Olguin-Reyes S, Castro-Belio T, Vázquez-Martínez O, Rivera-Zavala JB, Díaz-Muñoz M.	Carcinogenesis. 2017 Aug 1;38(8):847-858. doi: 10.1093/carcin/bgx052.	Molina-Aguilar C	Carcinogenesis	2017	24/05/2017			10.1093/carcin/bgx052
28530890	Strategies for management of intermittent fasting in patients with diabetes	Olansky L.	Cleve Clin J Med. 2017 May;84(5):357-358. doi: 10.3949/ccjm.84a.16118.	Olansky L	Cleve Clin J Med	2017	23/05/2017			10.3949/ccjm.84a.16118
28531269	Change in the Rate of Biological Aging in Response to Caloric Restriction: CALERIE Biobank Analysis	Belsky DW, Huffman KM, Pieper CF, Shalev I, Kraus WE.	J Gerontol A Biol Sci Med Sci. 2017 Dec 12;73(1):4-10. doi: 10.1093/gerona/glx096.	Belsky DW	J Gerontol A Biol Sci Med Sci	2017	23/05/2017	PMC5861848		10.1093/gerona/glx096
28514081	Weight loss and improved metabolic outcomes amongst rural African American women in the Deep South: six-month outcomes from a community-based randomized trial	Ard JD, Carson TL, Shikany JM, Li Y, Hardy CM, Robinson JC, Williams AG, Baskin ML.	J Intern Med. 2017 Jul;282(1):102-113. doi: 10.1111/joim.12622. Epub 2017 May 17.	Ard JD	J Intern Med	2017	18/05/2017	PMC6136898	NIHMS983967	10.1111/joim.12622
28503750	Comparative effects of liraglutide 3 mg vs structured lifestyle modification on body weight, liver fat and liver function in obese patients with non-alcoholic fatty liver disease: A pilot randomized trial	Khoo J, Hsiang J, Taneja R, Law NM, Ang TL.	Diabetes Obes Metab. 2017 Dec;19(12):1814-1817. doi: 10.1111/dom.13007. Epub 2017 Jul 14.	Khoo J	Diabetes Obes Metab	2017	16/05/2017			10.1111/dom.13007
28499848	Understanding obesity in the context of an Indigenous population-A qualitative study	Bell R, Smith C, Hale L, Kira G, Tumilty S.	Obes Res Clin Pract. 2017 Sep-Oct;11(5):558-566. doi: 10.1016/j.orcp.2017.04.006. Epub 2017 May 9.	Bell R	Obes Res Clin Pract	2017	14/05/2017			10.1016/j.orcp.2017.04.006
28483583	Lack of negative autocorrelations of daily food intake on successive days challenges the concept of the regulation of body weight in humans	Levitsky DA, Raea Limb JE, Wilkinson L, Sewall A, Zhong Y, Olabi A, Hunter J.	Appetite. 2017 Sep 1;116:277-283. doi: 10.1016/j.appet.2017.04.038. Epub 2017 May 5.	Levitsky DA	Appetite	2017	2017-10-05			10.1016/j.appet.2017.04.038
28479026	Correlates of physical activity counseling by health providers to patients with diabetes and hypertension attended by the Family Health Strategy in the state of Pernambuco, Brazil	Barbosa JMV, Souza WV, Ferreira RWM, Carvalho EMF, Cesse EAP, Fontbonne A.	Prim Care Diabetes. 2017 Aug;11(4):327-336. doi: 10.1016/j.pcd.2017.04.001. Epub 2017 May 3.	Barbosa JMV	Prim Care Diabetes	2017	2017-09-05			10.1016/j.pcd.2017.04.001
28482007	Molecular Biomarkers for Weight Control in Obese Individuals Subjected to a Multiphase Dietary Intervention	Bolton J, Montastier E, Carayol J, Bonnel S, Mir L, Marques MA, Astrup A, Saris W, Iacovoni J, Villa-Vialaneix N, Valsesia A, Langin D, Viguerie N.	J Clin Endocrinol Metab. 2017 Aug 1;102(8):2751-2761. doi: 10.1210/jc.2016-3997.	Bolton J	J Clin Endocrinol Metab	2017	2017-09-05			10.1210/jc.2016-3997
28475465	Food restriction alters salivary cortisol and α-amylase responses to a simulated weightlifting competition without significant performance modification	Durguerian A, Filaire E, Drogou C, Bougard C, Chennaoui M.	J Sports Sci. 2018 Mar;36(5):536-544. doi: 10.1080/02640414.2017.1322708. Epub 2017 May 5.	Durguerian A	J Sports Sci	2018	2017-06-05			10.1080/02640414.2017.1322708
28475159	Acute Vitamin D₃ Supplementation in Severe Obesity: Evaluation of Multimeric Adiponectin	Mai S, Walker GE, Vietti R, Cattaldo S, Mele C, Priano L, Mauro A, Bona G, Aimaretti G, Scacchi M, Marzullo P.	Nutrients. 2017 May 5;9(5):459. doi: 10.3390/nu9050459.	Mai S	Nutrients	2017	2017-06-05	PMC5452189		10.3390/nu9050459
28473063	Weight loss achieved using an energy restriction diet with normal or higher dietary protein decreased the number of CD14(++)CD16(+) proinflammatory monocytes and plasma lipids and lipoproteins in middle-aged, overweight, and obese adults	Kim JE, Lin G, Zhou J, Mund JA, Case J, Campbell WW.	Nutr Res. 2017 Apr;40:75-84. doi: 10.1016/j.nutres.2017.02.007. Epub 2017 Mar 14.	Kim JE	Nutr Res	2017	2017-06-05			10.1016/j.nutres.2017.02.007
28461102	Effect of caloric restriction on plasma melatonin levels in aged rhesus macaques	Aghazadeh-Sanai N, Downs JL, Mattison JA, Ingram DK, Kohama SG, Urbanski HF.	Neurobiol Aging. 2017 Jul;55:213-216. doi: 10.1016/j.neurobiolaging.2017.03.032. Epub 2017 Apr 8.	Aghazadeh-Sanai N	Neurobiol Aging	2017	2017-03-05	PMC5460625	NIHMS866800	10.1016/j.neurobiolaging.2017.03.032
28459931	Effect of Alternate-Day Fasting on Weight Loss, Weight Maintenance, and Cardioprotection Among Metabolically Healthy Obese Adults: A Randomized Clinical Trial	Trepanowski JF, Kroeger CM, Barnosky A, Klempel MC, Bhutani S, Hoddy KK, Gabel K, Freels S, Rigdon J, Rood J, Ravussin E, Varady KA.	JAMA Intern Med. 2017 Jul 1;177(7):930-938. doi: 10.1001/jamainternmed.2017.0936.	Trepanowski JF	JAMA Intern Med	2017	2017-02-05	PMC5680777	NIHMS877621	10.1001/jamainternmed.2017.0936
28456108	Psychometric evaluation of the short version of the Personal Diabetes Questionnaire to assess dietary behaviors and exercise in patients with type 2 diabetes	Akohoue SA, Wallston KA, Schlundt DG, Rothman RL.	Eat Behav. 2017 Aug;26:182-188. doi: 10.1016/j.eatbeh.2017.04.002. Epub 2017 Apr 6.	Akohoue SA	Eat Behav	2017	30/04/2017	PMC5715467	NIHMS871903	10.1016/j.eatbeh.2017.04.002
28446382	Compensatory mechanisms activated with intermittent energy restriction: A randomized control trial	Coutinho SR, Halset EH, Gåsbakk S, Rehfeld JF, Kulseng B, Truby H, Martins C.	Clin Nutr. 2018 Jun;37(3):815-823. doi: 10.1016/j.clnu.2017.04.002. Epub 2017 Apr 7.	Coutinho SR	Clin Nutr	2018	28/04/2017			10.1016/j.clnu.2017.04.002
28440779	The PREDIMED study	Ros E.	Endocrinol Diabetes Nutr. 2017 Feb;64(2):63-66. doi: 10.1016/j.endinu.2016.11.003. Epub 2017 Feb 1.	Ros E	Endocrinol Diabetes Nutr	2017	26/04/2017			10.1016/j.endinu.2016.11.003
28440522	[Nutrition management in obese patients with type 2 diabetes mellitus after laparoscopic sleeve gastrectomy]	Tang W, Chen Y, Pan M, Chen L, Zhang L, Wang T, Zhang X, Zhang P, Zheng C, Yu B.	Zhonghua Wei Chang Wai Ke Za Zhi. 2017 Apr 25;20(4):411-416.	Tang W	Zhonghua Wei Chang Wai Ke Za Zhi	2017	26/04/2017
28406702	An alternatively activated macrophage marker CD163 in severely obese patients: the influence of very low-calorie diet and bariatric surgery	Cinkajzlová A, Lacinová Z, Kloučková J, Kaválková P, Trachta P, Kosák M, Krátký J, Kasalický M, DoleŽalová K, Mráz M, Haluzík M.	Physiol Res. 2017 Sep 22;66(4):641-652. doi: 10.33549/physiolres.933522. Epub 2017 Apr 12.	Cinkajzlová A	Physiol Res	2017	14/04/2017			10.33549/physiolres.933522
28407662	Effects of A One-week Fasting Therapy in Patients with Type-2 Diabetes Mellitus and Metabolic Syndrome - A Randomized Controlled Explorative Study	Li C, Sadraie B, Steckhan N, Kessler C, Stange R, Jeitler M, Michalsen A.	Exp Clin Endocrinol Diabetes. 2017 Oct;125(9):618-624. doi: 10.1055/s-0043-101700. Epub 2017 Apr 13.	Li C	Exp Clin Endocrinol Diabetes	2017	14/04/2017			10.1055/s-0043-101700
28399005	Effects of a 6-month caloric restriction induced-weight loss program in obese postmenopausal women with and without the metabolic syndrome: a MONET study	Ghachem A, Prud'homme D, Rabasa-Lhoret R, Brochu M.	Menopause. 2017 Aug;24(8):908-915. doi: 10.1097/GME.0000000000000862.	Ghachem A	Menopause	2017	2017-12-04			10.1097/GME.0000000000000862
28388294	A Randomized, Double-Blind, Placebo-Controlled Trial to Determine the Effectiveness and Safety of a Thermogenic Supplement in Addition to an Energy-Restricted Diet in Apparently Healthy Females	Kendall KL, Hyde PN, Fairman CM, Hollaway KM, Mumford PW, Haun CT, Mobley B, Kephart WC, Tribby AC, Kimber D, Moon JR, Beck DT, Roberts MD, Young KC.	J Diet Suppl. 2017 Nov 2;14(6):653-666. doi: 10.1080/19390211.2017.1304484. Epub 2017 Apr 7.	Kendall KL	J Diet Suppl	2017	2017-08-04			10.1080/19390211.2017.1304484
28373182	Energy Balance Modulation Impacts Epigenetic Reprogramming, ERα and ERβ Expression, and Mammary Tumor Development in MMTV-neu Transgenic Mice	Rossi EL, Dunlap SM, Bowers LW, Khatib SA, Doerstling SS, Smith LA, Ford NA, Holley D, Brown PH, Estecio MR, Kusewitt DF, deGraffenried LA, Bultman SJ, Hursting SD.	Cancer Res. 2017 May 1;77(9):2500-2511. doi: 10.1158/0008-5472.CAN-16-2795. Epub 2017 Apr 3.	Rossi EL	Cancer Res	2017	2017-05-04	PMC5964334	NIHMS860297	10.1158/0008-5472.CAN-16-2795
28368246	Fasting: starving cancer	Cathcart P, Craddock C, Stebbing J.	Lancet Oncol. 2017 Apr;18(4):431. doi: 10.1016/S1470-2045(17)30196-1.	Cathcart P	Lancet Oncol	2017	2017-04-04			10.1016/S1470-2045(17)30196-1
28369078	The effect of meal frequency in a reduced-energy regimen on the gastrointestinal and appetite hormones in patients with type 2 diabetes: A randomised crossover study	Belinova L, Kahleova H, Malinska H, Topolcan O, Windrichova J, Oliyarnyk O, Kazdova L, Hill M, Pelikanova T.	PLoS One. 2017 Apr 3;12(4):e0174820. doi: 10.1371/journal.pone.0174820. eCollection 2017.	Belinova L	PLoS One	2017	2017-04-04	PMC5378398		10.1371/journal.pone.0174820
28355957	Adolescent brain activation: dependence on sex, dietary satiation, and restraint	Varley-Campbell JL, Fulford J, Moore MS, Williams CA.	Nutr Neurosci. 2018 Jul;21(6):439-446. doi: 10.1080/1028415X.2017.1306009. Epub 2017 Mar 30.	Varley-Campbell JL	Nutr Neurosci	2018	31/03/2017			10.1080/1028415X.2017.1306009
28351423	Epigenetic aging signatures in mice livers are slowed by dwarfism, calorie restriction and rapamycin treatment	Wang T, Tsui B, Kreisberg JF, Robertson NA, Gross AM, Yu MK, Carter H, Brown-Borg HM, Adams PD, Ideker T.	Genome Biol. 2017 Mar 28;18(1):57. doi: 10.1186/s13059-017-1186-2.	Wang T	Genome Biol	2017	30/03/2017	PMC5371228		10.1186/s13059-017-1186-2
28335489	Effects of the Mediterranean Diet before and after Weight Loss on Eating Behavioral Traits in Men with Metabolic Syndrome	Carbonneau É, Royer MM, Richard C, Couture P, Desroches S, Lemieux S, Lamarche B.	Nutrients. 2017 Mar 19;9(3):305. doi: 10.3390/nu9030305.	Carbonneau É	Nutrients	2017	25/03/2017	PMC5372968		10.3390/nu9030305
28337029	The impact of protein quantity during energy restriction on genome-wide gene expression in adipose tissue of obese humans	Van Bussel IPG, Backx EMP, De Groot CPGM, Tieland M, Müller M, Afman LA.	Int J Obes (Lond). 2017 Jul;41(7):1114-1120. doi: 10.1038/ijo.2017.76. Epub 2017 Mar 24.	Van Bussel IPG	Int J Obes (Lond)	2017	25/03/2017			10.1038/ijo.2017.76
28329121	Very Low Calorie Diets for Weight Loss in Obese Older Adults-A Randomized Trial	Haywood CJ, Prendergast LA, Purcell K, Le Fevre L, Lim WK, Galea M, Proietto J.	J Gerontol A Biol Sci Med Sci. 2017 Dec 12;73(1):59-65. doi: 10.1093/gerona/glx012.	Haywood CJ	J Gerontol A Biol Sci Med Sci	2017	23/03/2017			10.1093/gerona/glx012
28329151	Caloric Restriction and Rapamycin Differentially Alter Energy Metabolism in Yeast	Choi KM, Hong SJ, van Deursen JM, Kim S, Kim KH, Lee CK.	J Gerontol A Biol Sci Med Sci. 2017 Dec 12;73(1):29-38. doi: 10.1093/gerona/glx024.	Choi KM	J Gerontol A Biol Sci Med Sci	2017	23/03/2017			10.1093/gerona/glx024
28298393	A role for leukocyte integrins and extracellular matrix remodeling of adipose tissue in the risk of weight regain after weight loss	Roumans NJ, Vink RG, Fazelzadeh P, van Baak MA, Mariman EC.	Am J Clin Nutr. 2017 May;105(5):1054-1062. doi: 10.3945/ajcn.116.148874. Epub 2017 Mar 15.	Roumans NJ	Am J Clin Nutr	2017	17/03/2017			10.3945/ajcn.116.148874
28284569	Predictors of preoperative weight loss achievement in adult bariatric surgery candidates while following a low-calorie diet for 4 weeks	Hutcheon DA, Byham-Gray LD, Marcus AF, Scott JD, Miller M.	Surg Obes Relat Dis. 2017 Jun;13(6):1041-1051. doi: 10.1016/j.soard.2016.12.026. Epub 2016 Dec 29.	Hutcheon DA	Surg Obes Relat Dis	2017	13/03/2017			10.1016/j.soard.2016.12.026
28281136	Ecological Momentary Assessment of Dietary Lapses Across Behavioral Weight Loss Treatment: Characteristics, Predictors, and Relationships with Weight Change	Forman EM, Schumacher LM, Crosby R, Manasse SM, Goldstein SP, Butryn ML, Wyckoff EP, Graham Thomas J.	Ann Behav Med. 2017 Oct;51(5):741-753. doi: 10.1007/s12160-017-9897-x.	Forman EM	Ann Behav Med	2017	2017-11-03	PMC5591758	NIHMS859101	10.1007/s12160-017-9897-x
28275127	Persistence of weight loss and acquired behaviors 2 y after stopping a 2-y calorie restriction intervention	Marlatt KL, Redman LM, Burton JH, Martin CK, Ravussin E.	Am J Clin Nutr. 2017 Apr;105(4):928-935. doi: 10.3945/ajcn.116.146837. Epub 2017 Mar 8.	Marlatt KL	Am J Clin Nutr	2017	2017-10-03	PMC5366052		10.3945/ajcn.116.146837
28261926	Acute caloric restriction counteracts hepatic bile acid and cholesterol deficiency in morbid obesity	Straniero S, Rosqvist F, Edholm D, Ahlström H, Kullberg J, Sundbom M, Risérus U, Rudling M.	J Intern Med. 2017 May;281(5):507-517. doi: 10.1111/joim.12599. Epub 2017 Mar 6.	Straniero S	J Intern Med	2017	2017-07-03			10.1111/joim.12599
28249745	Food cravings in everyday life: An EMA study on snack-related thoughts, cravings, and consumption	Richard A, Meule A, Reichenberger J, Blechert J.	Appetite. 2017 Jun 1;113:215-223. doi: 10.1016/j.appet.2017.02.037. Epub 2017 Feb 27.	Richard A	Appetite	2017	2017-03-03			10.1016/j.appet.2017.02.037
28251782	One-year calorie restriction impacts gut microbial composition but not its metabolic performance in obese adolescents	Ruiz A, Cerdó T, Jáuregui R, Pieper DH, Marcos A, Clemente A, García F, Margolles A, Ferrer M, Campoy C, Suárez A.	Environ Microbiol. 2017 Apr;19(4):1536-1551. doi: 10.1111/1462-2920.13713.	Ruiz A	Environ Microbiol	2017	2017-03-03			10.1111/1462-2920.13713
28244706	Her shape' intervention programme for obese women with high breast adiposity	Juliana N, Shahar S, Sahar MA, Ghazali AR, Manaf ZA, Noah RM.	Asia Pac J Clin Nutr. 2017 Mar;26(2):278-286. doi: 10.6133/apjcn.122015.05.	Juliana N	Asia Pac J Clin Nutr	2017	2017-01-03			10.6133/apjcn.122015.05
28237295	Carbohydrate quality and quantity affects the composition of the red blood cell fatty acid membrane in overweight and obese individuals	Giardina S, Sala-Vila A, Hernández-Alonso P, Calvo C, Salas-Salvadó J, Bulló M.	Clin Nutr. 2018 Apr;37(2):481-487. doi: 10.1016/j.clnu.2017.02.006. Epub 2017 Feb 11.	Giardina S	Clin Nutr	2018	27/02/2017			10.1016/j.clnu.2017.02.006
28228420	Body-composition changes in the Comprehensive Assessment of Long-term Effects of Reducing Intake of Energy (CALERIE)-2 study: a 2-y randomized controlled trial of calorie restriction in nonobese humans	Das SK, Roberts SB, Bhapkar MV, Villareal DT, Fontana L, Martin CK, Racette SB, Fuss PJ, Kraus WE, Wong WW, Saltzman E, Pieper CF, Fielding RA, Schwartz AV, Ravussin E, Redman LM; CALERIE-2 Study Group.	Am J Clin Nutr. 2017 Apr;105(4):913-927. doi: 10.3945/ajcn.116.137232. Epub 2017 Feb 22.	Das SK	Am J Clin Nutr	2017	24/02/2017	PMC5366044		10.3945/ajcn.116.137232
28230324	Effects of short-term energy restriction on liver lipid content and inflammatory status in severely obese adults: Results of a randomized controlled trial using 2 dietary approaches	Baldry EL, Aithal GP, Kaye P, Idris IR, Bennett A, Leeder PC, Macdonald IA.	Diabetes Obes Metab. 2017 Aug;19(8):1179-1183. doi: 10.1111/dom.12918. Epub 2017 Mar 31.	Baldry EL	Diabetes Obes Metab	2017	24/02/2017			10.1111/dom.12918
28225054	Nutritional adequacy of diets for adolescents with overweight and obesity: considerations for dietetic practice	Lister NB, Gow ML, Chisholm K, Grunseit A, Garnett SP, Baur LA.	Eur J Clin Nutr. 2017 May;71(5):646-651. doi: 10.1038/ejcn.2016.268. Epub 2017 Feb 22.	Lister NB	Eur J Clin Nutr	2017	23/02/2017			10.1038/ejcn.2016.268
28198412	A screening strategy for the discovery of drugs that reduce C/EBPβ-LIP translation with potential calorie restriction mimetic properties	Zaini MA, Müller C, Ackermann T, Reinshagen J, Kortman G, Pless O, Calkhoven CF.	Sci Rep. 2017 Feb 15;7:42603. doi: 10.1038/srep42603.	Zaini MA	Sci Rep	2017	16/02/2017	PMC5309760		10.1038/srep42603
28196253	Unveiling the "Magic" of Diabetes Remission After Weight-Loss Surgery	Abbasi J.	JAMA. 2017 Feb 14;317(6):571-574. doi: 10.1001/jama.2017.0020.	Abbasi J	JAMA	2017	15/02/2017			10.1001/jama.2017.0020
28183366	Effects of almond consumption on the post-lunch dip and long-term cognitive function in energy-restricted overweight and obese adults	Dhillon J, Tan SY, Mattes RD.	Br J Nutr. 2017 Feb;117(3):395-402. doi: 10.1017/S0007114516004463. Epub 2017 Feb 10.	Dhillon J	Br J Nutr	2017	2017-11-02			10.1017/S0007114516004463
28166780	Effect of a high protein diet and/or resistance exercise on the preservation of fat free mass during weight loss in overweight and obese older adults: a randomized controlled trial	Verreijen AM, Engberink MF, Memelink RG, van der Plas SE, Visser M, Weijs PJ.	Nutr J. 2017 Feb 6;16(1):10. doi: 10.1186/s12937-017-0229-6.	Verreijen AM	Nutr J	2017	2017-08-02	PMC5294725		10.1186/s12937-017-0229-6
28165552	Effects of very-low-calorie diet on body composition, metabolic state, and genes expression: a randomized double-blind placebo-controlled trial	Merra G, Gratteri S, De Lorenzo A, Barrucco S, Perrone MA, Avolio E, Bernardini S, Marchetti M, Di Renzo L.	Eur Rev Med Pharmacol Sci. 2017 Jan;21(2):329-345.	Merra G	Eur Rev Med Pharmacol Sci	2017	2017-07-02
28158621	Calorie Restriction-induced Weight Loss and Exercise Have Differential Effects on Skeletal Muscle Mitochondria Despite Similar Effects on Insulin Sensitivity	Menshikova EV, Ritov VB, Dube JJ, Amati F, Stefanovic-Racic M, Toledo FGS, Coen PM, Goodpaster BH.	J Gerontol A Biol Sci Med Sci. 2017 Dec 12;73(1):81-87. doi: 10.1093/gerona/glw328.	Menshikova EV	J Gerontol A Biol Sci Med Sci	2017	2017-04-02	PMC5861934		10.1093/gerona/glw328
28147330	Alleviation of senescence and epithelial-mesenchymal transition in aging kidney by short-term caloric restriction and caloric restriction mimetics via modulation of AMPK/mTOR signaling	Dong D, Cai GY, Ning YC, Wang JC, Lv Y, Hong Q, Cui SY, Fu B, Guo YN, Chen XM.	Oncotarget. 2017 Mar 7;8(10):16109-16121. doi: 10.18632/oncotarget.14884.	Dong D	Oncotarget	2017	2017-02-02	PMC5369951		10.18632/oncotarget.14884
28138133	Thyroid hormones and changes in body weight and metabolic parameters in response to weight loss diets: the POUNDS LOST trial	Liu G, Liang L, Bray GA, Qi L, Hu FB, Rood J, Sacks FM, Sun Q.	Int J Obes (Lond). 2017 Jun;41(6):878-886. doi: 10.1038/ijo.2017.28. Epub 2017 Jan 31.	Liu G	Int J Obes (Lond)	2017	2017-01-02	PMC5461198	NIHMS851509	10.1038/ijo.2017.28
28112773	Combination of Recreational Soccer and Caloric Restricted Diet Reduces Markers of Protein Catabolism and Cardiovascular Risk in Patients with Type 2 Diabetes	Vieira de Sousa M, Fukui R, Krustrup P, Dagogo-Jack S, Rossi da Silva ME.	J Nutr Health Aging. 2017;21(2):180-186. doi: 10.1007/s12603-015-0708-4.	Vieira de Sousa M	J Nutr Health Aging	2017	24/01/2017			10.1007/s12603-015-0708-4
28089080	Salba-chia (Salvia hispanica L.) in the treatment of overweight and obese patients with type 2 diabetes: A double-blind randomized controlled trial	Vuksan V, Jenkins AL, Brissette C, Choleva L, Jovanovski E, Gibbs AL, Bazinet RP, Au-Yeung F, Zurbau A, Ho HV, Duvnjak L, Sievenpiper JL, Josse RG, Hanna A.	Nutr Metab Cardiovasc Dis. 2017 Feb;27(2):138-146. doi: 10.1016/j.numecd.2016.11.124. Epub 2016 Dec 9.	Vuksan V	Nutr Metab Cardiovasc Dis	2017	17/01/2017			10.1016/j.numecd.2016.11.124
28075418	Serum Polychlorinated Biphenyls Increase and Oxidative Stress Decreases with a Protein-Pacing Caloric Restriction Diet in Obese Men and Women	He F, Zuo L, Ward E, Arciero PJ.	Int J Environ Res Public Health. 2017 Jan 10;14(1):59. doi: 10.3390/ijerph14010059.	He F	Int J Environ Res Public Health	2017	2017-12-01	PMC5295310		10.3390/ijerph14010059
28071011	The effects of a low-calorie diet or an isocaloric diet combined with metformin on sex hormones In obese women of child-bearing age	Swora-Cwynar E, Kujawska-Łuczak M, Suliburska J, Reguła J, Kargulewicz A, Kręgielska-Narożna M, Marcinkowska E, Kanikowska A, Bielas M, Grzymisławski M, Bogdański P.	Acta Sci Pol Technol Aliment. 2016 Apr-Jun;15(2):213-220. doi: 10.17306/J.AFS.2016.2.21.	Swora-Cwynar E	Acta Sci Pol Technol Aliment	2016	2017-11-01			10.17306/J.AFS.2016.2.21
28060600	Influence of Energy Balance and Glycemic Index on Metabolic Endotoxemia in Healthy Men	Breusing N, Lagerpusch M, Engstler AJ, Bergheim I, Mueller MJ, Bosy-Westphal A.	J Am Coll Nutr. 2017 Jan;36(1):72-79. doi: 10.1080/07315724.2016.1156036. Epub 2017 Jan 6.	Breusing N	J Am Coll Nutr	2017	2017-07-01			10.1080/07315724.2016.1156036
28041931	Prior Dietary Practices and Connections to a Human Gut Microbial Metacommunity Alter Responses to Diet Interventions	Griffin NW, Ahern PP, Cheng J, Heath AC, Ilkayeva O, Newgard CB, Fontana L, Gordon JI.	Cell Host Microbe. 2017 Jan 11;21(1):84-96. doi: 10.1016/j.chom.2016.12.006. Epub 2016 Dec 29.	Griffin NW	Cell Host Microbe	2017	2017-03-01	PMC5234936	NIHMS837599	10.1016/j.chom.2016.12.006
28029409	Serum concentrations and gene expression of sirtuin 1 in healthy and slightly overweight subjects after caloric restriction or resveratrol supplementation: A randomized trial	Mansur AP, Roggerio A, Goes MFS, Avakian SD, Leal DP, Maranhão RC, Strunz CMC.	Int J Cardiol. 2017 Jan 15;227:788-794. doi: 10.1016/j.ijcard.2016.10.058. Epub 2016 Oct 27.	Mansur AP	Int J Cardiol	2017	29/12/2016			10.1016/j.ijcard.2016.10.058
28007936	Proteomics reveals the effects of sustained weight loss on the human plasma proteome	Geyer PE, Wewer Albrechtsen NJ, Tyanova S, Grassl N, Iepsen EW, Lundgren J, Madsbad S, Holst JJ, Torekov SS, Mann M.	Mol Syst Biol. 2016 Dec 22;12(12):901. doi: 10.15252/msb.20167357.	Geyer PE	Mol Syst Biol	2016	24/12/2016	PMC5199119		10.15252/msb.20167357
28003374	Effects of Calorie Restriction in Obese Older Adults: The CROSSROADS Randomized Controlled Trial	Ard JD, Gower B, Hunter G, Ritchie CS, Roth DL, Goss A, Wingo BC, Bodner EV, Brown CJ, Bryan D, Buys DR, Haas MC, Keita AD, Flagg LA, Williams CP, Locher JL.	J Gerontol A Biol Sci Med Sci. 2017 Dec 12;73(1):73-80. doi: 10.1093/gerona/glw237.	Ard JD	J Gerontol A Biol Sci Med Sci	2017	23/12/2016	PMC5861948		10.1093/gerona/glw237
28000468	A randomized control trial for reduction of caloric and non-caloric sweetened beverages in young adults: effects in weight, body composition and blood pressure	Vázquez-Durán M, Orea-Tejeda A, Castillo-Martínez L, Cano-García Á, Téllez-Olvera L, Keirns-Davis C.	Nutr Hosp. 2016 Nov 29;33(6):1372-1378. doi: 10.20960/nh.797.	Vázquez-Durán M	Nutr Hosp	2016	22/12/2016			10.20960/nh.797
27999360	Self-Reported Dietary Restrictions and Dietary Patterns in Polish Girls: A Short Research Report (GEBaHealth Study)	Galinski G, Lonnie M, Kowalkowska J, Wadolowska L, Czarnocinska J, Jezewska-Zychowicz M, Babicz-Zielinska E.	Nutrients. 2016 Dec 19;8(12):796. doi: 10.3390/nu8120796.	Galinski G	Nutrients	2016	22/12/2016	PMC5188451		10.3390/nu8120796
27999852	Effect of a High-Protein Energy-Restricted Diet Combined with Resistance Training on Metabolic Profile in Older Individuals with Metabolic Impairments	Amamou T, Normandin E, Pouliot J, Dionne IJ, Brochu M, Riesco E.	J Nutr Health Aging. 2017;21(1):67-74. doi: 10.1007/s12603-016-0760-8.	Amamou T	J Nutr Health Aging	2017	22/12/2016			10.1007/s12603-016-0760-8
27986499	Targeting chromatin aging - The epigenetic impact of longevity-associated interventions	Field AE, Adams PD.	Exp Gerontol. 2017 Aug;94:29-33. doi: 10.1016/j.exger.2016.12.010. Epub 2016 Dec 13.	Field AE	Exp Gerontol	2017	18/12/2016			10.1016/j.exger.2016.12.010
27981590	Dietary restriction and aerobic exercise attenuate obesity-induced lymphatic dysfunction	Lee SH, Hadipour-Lakmehsari S.	J Physiol. 2017 Mar 15;595(6):1855-1856. doi: 10.1113/JP273799. Epub 2017 Jan 24.	Lee SH	J Physiol	2017	17/12/2016	PMC5350471		10.1113/JP273799
27969553	Restrictions on Oral and Parenteral Intake for Low-risk Labouring Women in Hospitals Across Canada: A Cross-Sectional Study	Chackowicz A, Spence AR, Abenhaim HA.	J Obstet Gynaecol Can. 2016 Nov;38(11):1009-1014. doi: 10.1016/j.jogc.2016.08.003. Epub 2016 Sep 8.	Chackowicz A	J Obstet Gynaecol Can	2016	15/12/2016			10.1016/j.jogc.2016.08.003
27940180	The Lifestyle Intervention for the Treatment of Diabetes study (LIFT Diabetes): Design and baseline characteristics for a randomized translational trial to improve control of cardiovascular disease risk factors	Katula JA, Kirk JK, Pedley CF, Savoca MR, Effoe VS, Bell RA, Bertoni AG; LIFT Diabetes Team.	Contemp Clin Trials. 2017 Feb;53:89-99. doi: 10.1016/j.cct.2016.12.005. Epub 2016 Dec 7.	Katula JA	Contemp Clin Trials	2017	13/12/2016	PMC5274593	NIHMS838567	10.1016/j.cct.2016.12.005
27916987	Weight loss-induced cellular stress in subcutaneous adipose tissue and the risk for weight regain in overweight and obese adults	Roumans NJT, Vink RG, Bouwman FG, Fazelzadeh P, van Baak MA, Mariman ECM.	Int J Obes (Lond). 2017 Jun;41(6):894-901. doi: 10.1038/ijo.2016.221. Epub 2016 Dec 5.	Roumans NJT	Int J Obes (Lond)	2017	2016-06-12			10.1038/ijo.2016.221
27900849	Combined use of a wristband and a smartphone to reduce body weight in obese children: randomized controlled trial	Mameli C, Brunetti D, Colombo V, Bedogni G, Schneider L, Penagini F, Borsani B, Zuccotti GV.	Pediatr Obes. 2018 Feb;13(2):81-87. doi: 10.1111/ijpo.12201. Epub 2016 Nov 29.	Mameli C	Pediatr Obes	2018	2016-01-12			10.1111/ijpo.12201
27899768	Effects of dietary restriction on adipose mass and biomarkers of healthy aging in human	Lettieri-Barbato D, Giovannetti E, Aquilano K.	Aging (Albany NY). 2016 Nov 29;8(12):3341-3355. doi: 10.18632/aging.101122.	Lettieri-Barbato D	Aging (Albany NY)	2016	2016-01-12	PMC5270672		10.18632/aging.101122
27894742	Metabolic state defines the response of rabbit ovarian cells to leptin	Harrath AH, Østrup O, Rafay J, Koničková Florkovičová I, Laurincik J, Sirotkin AV.	Reprod Biol. 2017 Mar;17(1):19-24. doi: 10.1016/j.repbio.2016.11.002. Epub 2016 Nov 25.	Harrath AH	Reprod Biol	2017	30/11/2016			10.1016/j.repbio.2016.11.002
27894746	Roux-en-Y gastric bypass versus calorie restriction: support for surgery per se as the direct contributor to altered responses of insulin and incretins to a mixed meal	Berggren J, Lindqvist A, Hedenbro J, Groop L, Wierup N.	Surg Obes Relat Dis. 2017 Feb;13(2):234-242. doi: 10.1016/j.soard.2016.09.017. Epub 2016 Sep 28.	Berggren J	Surg Obes Relat Dis	2017	30/11/2016			10.1016/j.soard.2016.09.017
27898428	Beneficial Effects of a Dietary Weight Loss Intervention on Human Gut Microbiome Diversity and Metabolism Are Not Sustained during Weight Maintenance	Heinsen FA, Fangmann D, Müller N, Schulte DM, Rühlemann MC, Türk K, Settgast U, Lieb W, Baines JF, Schreiber S, Franke A, Laudes M.	Obes Facts. 2016;9(6):379-391. doi: 10.1159/000449506. Epub 2016 Nov 30.	Heinsen FA	Obes Facts	2016	30/11/2016	PMC5644845		10.1159/000449506
27894065	Evaluation of CSF and plasma biomarkers of brain melanocortin activity in response to caloric restriction in humans	Page-Wilson G, Nguyen KT, Atalayer D, Meece K, Bainbridge HA, Korner J, Gordon RJ, Panigrahi SK, White A, Smiley R, Wardlaw SL.	Am J Physiol Endocrinol Metab. 2017 Jan 1;312(1):E19-E26. doi: 10.1152/ajpendo.00330.2016. Epub 2016 Nov 15.	Page-Wilson G	Am J Physiol Endocrinol Metab	2017	29/11/2016	PMC5283881		10.1152/ajpendo.00330.2016
27889809	Reversal of type 2 diabetes in youth who adhere to a very-low-energy diet: a pilot study	Gow ML, Baur LA, Johnson NA, Cowell CT, Garnett SP.	Diabetologia. 2017 Mar;60(3):406-415. doi: 10.1007/s00125-016-4163-5. Epub 2016 Nov 26.	Gow ML	Diabetologia	2017	28/11/2016			10.1007/s00125-016-4163-5
27886073	Effect of Six-Month Diet Intervention on Sleep among Overweight and Obese Men with Chronic Insomnia Symptoms: A Randomized Controlled Trial	Tan X, Alén M, Wang K, Tenhunen J, Wiklund P, Partinen M, Cheng S.	Nutrients. 2016 Nov 23;8(11):751. doi: 10.3390/nu8110751.	Tan X	Nutrients	2016	26/11/2016	PMC5133133		10.3390/nu8110751
27881466	Caloric restriction improves health-related quality of life in healthy normal weight and overweight individuals	Butsch WS, Stanford FC.	Evid Based Med. 2017 Mar;22(1):33. doi: 10.1136/ebmed-2016-110526. Epub 2016 Nov 23.	Butsch WS	Evid Based Med	2017	25/11/2016	PMC6345640	NIHMS1001371	10.1136/ebmed-2016-110526
27881670	The effect of alternate-day caloric restriction on the metabolic consequences of 8 days of bed rest in healthy lean men: a randomized trial	Harder-Lauridsen NM, Nielsen ST, Mann SP, Lyngbæk MP, Benatti FB, Langkilde AR, Law I, Wedell-Neergaard AS, Thomsen C, Møller K, Karstoft K, Pedersen BK, Krogh-Madsen R.	J Appl Physiol (1985). 2017 Feb 1;122(2):230-241. doi: 10.1152/japplphysiol.00846.2016. Epub 2016 Nov 23.	Harder-Lauridsen NM	J Appl Physiol (1985)	2017	25/11/2016			10.1152/japplphysiol.00846.2016
27879627	Dietary Intake, Body Composition, and Menstrual Cycle Changes during Competition Preparation and Recovery in a Drug-Free Figure Competitor: A Case Study	Halliday TM, Loenneke JP, Davy BM.	Nutrients. 2016 Nov 20;8(11):740. doi: 10.3390/nu8110740.	Halliday TM	Nutrients	2016	24/11/2016	PMC5133123		10.3390/nu8110740
27878727	Effectiveness of Lifestyle Modification in Corrections of States Associated with Metabolic Syndrome	Kseneva SI, Borodulina EV, Trifonova OY, Udut VV.	Bull Exp Biol Med. 2016 Nov;162(1):38-41. doi: 10.1007/s10517-016-3539-3. Epub 2016 Nov 23.	Kseneva SI	Bull Exp Biol Med	2016	24/11/2016			10.1007/s10517-016-3539-3
27865348	Nutrient restriction of glucose or serum results in similar proteomic expression changes in 3D colon cancer cell cultures	Schroll MM, Liu X, Herzog SK, Skube SB, Hummon AB.	Nutr Res. 2016 Oct;36(10):1068-1080. doi: 10.1016/j.nutres.2016.08.002. Epub 2016 Aug 14.	Schroll MM	Nutr Res	2016	21/11/2016	PMC5119765	NIHMS810621	10.1016/j.nutres.2016.08.002
27840413	Adipose tissue gene expression is differentially regulated with different rates of weight loss in overweight and obese humans	Vink RG, Roumans NJ, Fazelzadeh P, Tareen SH, Boekschoten MV, van Baak MA, Mariman EC.	Int J Obes (Lond). 2017 Feb;41(2):309-316. doi: 10.1038/ijo.2016.201. Epub 2016 Nov 14.	Vink RG	Int J Obes (Lond)	2017	15/11/2016			10.1038/ijo.2016.201
27833048	The effects of intermittent compared to continuous energy restriction on glycaemic control in type 2 diabetes; a pragmatic pilot trial	Carter S, Clifton PM, Keogh JB.	Diabetes Res Clin Pract. 2016 Dec;122:106-112. doi: 10.1016/j.diabres.2016.10.010. Epub 2016 Oct 19.	Carter S	Diabetes Res Clin Pract	2016	2016-12-11			10.1016/j.diabres.2016.10.010
27807041	Almond Consumption during Energy Restriction Lowers Truncal Fat and Blood Pressure in Compliant Overweight or Obese Adults	Dhillon J, Tan SY, Mattes RD.	J Nutr. 2016 Dec;146(12):2513-2519. doi: 10.3945/jn.116.238444. Epub 2016 Nov 2.	Dhillon J	J Nutr	2016	2016-04-11			10.3945/jn.116.238444
27806971	Effect of 24-h severe energy restriction on appetite regulation and ad libitum energy intake in lean men and women	Clayton DJ, Burrell K, Mynott G, Creese M, Skidmore N, Stensel DJ, James LJ.	Am J Clin Nutr. 2016 Dec;104(6):1545-1553. doi: 10.3945/ajcn.116.136937. Epub 2016 Nov 2.	Clayton DJ	Am J Clin Nutr	2016	2016-04-11			10.3945/ajcn.116.136937
27794457	Perspectives in aging: Nutritional and energetic interventions	Austad SN, Allison DB.	Exp Gerontol. 2016 Dec 15;86:1-3. doi: 10.1016/j.exger.2016.10.007. Epub 2016 Oct 26.	Austad SN	Exp Gerontol	2016	31/10/2016	PMC8162935	NIHMS1700357	10.1016/j.exger.2016.10.007
27782114	Less-than-expected weight loss in normal-weight women undergoing caloric restriction and exercise is accompanied by preservation of fat-free mass and metabolic adaptations	Koehler K, De Souza MJ, Williams NI.	Eur J Clin Nutr. 2017 Mar;71(3):365-371. doi: 10.1038/ejcn.2016.203. Epub 2016 Oct 26.	Koehler K	Eur J Clin Nutr	2017	27/10/2016			10.1038/ejcn.2016.203
27760368	Resveratrol induces mitochondrial respiration and apoptosis in SW620 colon cancer cells	Blanquer-Rosselló MD, Hernández-López R, Roca P, Oliver J, Valle A.	Biochim Biophys Acta Gen Subj. 2017 Feb;1861(2):431-440. doi: 10.1016/j.bbagen.2016.10.009. Epub 2016 Oct 17.	Blanquer-Rosselló MD	Biochim Biophys Acta Gen Subj	2017	26/10/2016			10.1016/j.bbagen.2016.10.009
27778643	Effects of 12 Months of Caloric Restriction on Muscle Mitochondrial Function in Healthy Individuals	Sparks LM, Redman LM, Conley KE, Harper ME, Yi F, Hodges A, Eroshkin A, Costford SR, Gabriel ME, Shook C, Cornnell HH, Ravussin E, Smith SR.	J Clin Endocrinol Metab. 2017 Jan 1;102(1):111-121. doi: 10.1210/jc.2016-3211.	Sparks LM	J Clin Endocrinol Metab	2017	26/10/2016	PMC5413108		10.1210/jc.2016-3211
27773549	Effects of acute dietary weight loss on postprandial plasma bile acid responses in obese insulin resistant subjects	van Nierop FS, Kulik W, Endert E, Schaap FG, Olde Damink SW, Romijn JA, Soeters MR.	Clin Nutr. 2017 Dec;36(6):1615-1620. doi: 10.1016/j.clnu.2016.10.006. Epub 2016 Oct 13.	van Nierop FS	Clin Nutr	2017	25/10/2016			10.1016/j.clnu.2016.10.006
27759067	Impact of weight loss-associated changes in detailed body composition as assessed by whole-body MRI on plasma insulin levels and homeostatis model assessment index	Pourhassan M, Glüer CC, Pick P, Tigges W, Müller MJ.	Eur J Clin Nutr. 2017 Feb;71(2):212-218. doi: 10.1038/ejcn.2016.189. Epub 2016 Oct 19.	Pourhassan M	Eur J Clin Nutr	2017	21/10/2016			10.1038/ejcn.2016.189
27756309	Nutritional management of a patient with obesity and pulmonary embolism: a case report	Fonte ML, Fietchner L, Manuelli M, Cena H.	Nutr J. 2016 Oct 19;15(1):90. doi: 10.1186/s12937-016-0202-9.	Fonte ML	Nutr J	2016	21/10/2016	PMC5070167		10.1186/s12937-016-0202-9
27754807	Body Composition Changes After Very-Low-Calorie Ketogenic Diet in Obesity Evaluated by 3 Standardized Methods	Gomez-Arbelaez D, Bellido D, Castro AI, Ordoñez-Mayan L, Carreira J, Galban C, Martinez-Olmos MA, Crujeiras AB, Sajoux I, Casanueva FF.	J Clin Endocrinol Metab. 2017 Feb 1;102(2):488-498. doi: 10.1210/jc.2016-2385.	Gomez-Arbelaez D	J Clin Endocrinol Metab	2017	19/10/2016			10.1210/jc.2016-2385
27744739	The Role of Exercise in a Weight-Loss Program on Clinical Control in Obese Adults with Asthma. A Randomized Controlled Trial	Freitas PD, Ferreira PG, Silva AG, Stelmach R, Carvalho-Pinto RM, Fernandes FL, Mancini MC, Sato MN, Martins MA, Carvalho CR.	Am J Respir Crit Care Med. 2017 Jan 1;195(1):32-42. doi: 10.1164/rccm.201603-0446OC.	Freitas PD	Am J Respir Crit Care Med	2017	18/10/2016			10.1164/rccm.201603-0446OC
27748014	Beneficial effects of replacing diet beverages with water on type 2 diabetic obese women following a hypo-energetic diet: A randomized, 24-week clinical trial	Madjd A, Taylor MA, Delavari A, Malekzadeh R, Macdonald IA, Farshchi HR.	Diabetes Obes Metab. 2017 Jan;19(1):125-132. doi: 10.1111/dom.12793. Epub 2016 Oct 16.	Madjd A	Diabetes Obes Metab	2017	18/10/2016			10.1111/dom.12793
27737674	Effects of eight weeks of time-restricted feeding (16/8) on basal metabolism, maximal strength, body composition, inflammation, and cardiovascular risk factors in resistance-trained males	Moro T, Tinsley G, Bianco A, Marcolin G, Pacelli QF, Battaglia G, Palma A, Gentil P, Neri M, Paoli A.	J Transl Med. 2016 Oct 13;14(1):290. doi: 10.1186/s12967-016-1044-0.	Moro T	J Transl Med	2016	15/10/2016	PMC5064803		10.1186/s12967-016-1044-0
27741216	Effect of Resistance Training and Caloric Restriction on the Metabolic Syndrome	Normandin E, Chmelo E, Lyles MF, Marsh AP, Nicklas BJ.	Med Sci Sports Exerc. 2017 Mar;49(3):413-419. doi: 10.1249/MSS.0000000000001122.	Normandin E	Med Sci Sports Exerc	2017	15/10/2016	PMC5315658	NIHMS821811	10.1249/MSS.0000000000001122
27735028	Improvement of serum adiponectin and leptin concentrations: effects of a low-calorie or isocaloric diet combined with metformin or orlistat - a prospective randomized open-label trial	Kargulewicz A, Szulińska M, Kujawska-Łuczak M, Swora-Cwynar E, Musialik K, Grzymisławska M, Kręgielska-Narożna M, Bogdański P.	Eur Rev Med Pharmacol Sci. 2016 Sep;20(18):3868-3876.	Kargulewicz A	Eur Rev Med Pharmacol Sci	2016	14/10/2016
27733249	Weight loss induced by very low calorie diet is associated with a more beneficial systemic inflammatory profile than by Roux-en-Y gastric bypass	Lips MA, van Klinken JB, Pijl H, Janssen I, Willems van Dijk K, Koning F, van Harmelen V.	Metabolism. 2016 Nov;65(11):1614-1620. doi: 10.1016/j.metabol.2016.07.013. Epub 2016 Aug 16.	Lips MA	Metabolism	2016	14/10/2016			10.1016/j.metabol.2016.07.013
27715401	Comparison of Early (2 Days) and Later (28 Days) Response of Adipose Tissue to Very Low-Calorie Diet in Obese Women	Šrámková V, Rossmeislová L, Krauzová E, Kračmerová J, Koc M, Langin D, Štich V, Šiklová M.	J Clin Endocrinol Metab. 2016 Dec;101(12):5021-5029. doi: 10.1210/jc.2016-2161. Epub 2016 Oct 7.	Šrámková V	J Clin Endocrinol Metab	2016	2016-08-10			10.1210/jc.2016-2161
27716232	The role of expression imbalance between adipose synthesis and storage mediated by PPAR-γ/FSP27 in the formation of insulin resistance in catch up growth	Wang SX, Wei JG, Chen LL, Hu X, Kong W.	Lipids Health Dis. 2016 Oct 4;15(1):173. doi: 10.1186/s12944-016-0319-z.	Wang SX	Lipids Health Dis	2016	2016-08-10	PMC5050960		10.1186/s12944-016-0319-z
27693581	Fasting boosts sensitivity of human skin melanoma to cisplatin-induced cell death	Antunes F, Corazzari M, Pereira G, Fimia GM, Piacentini M, Smaili S.	Biochem Biophys Res Commun. 2017 Mar 25;485(1):16-22. doi: 10.1016/j.bbrc.2016.09.149. Epub 2016 Sep 29.	Antunes F	Biochem Biophys Res Commun	2017	2016-04-10			10.1016/j.bbrc.2016.09.149
27687742	The effects of intermittent calorie restriction on metabolic health: Rationale and study design of the HELENA Trial	Schübel R, Graf ME, Nattenmüller J, Nabers D, Sookthai D, Gruner LF, Johnson T, Schlett CL, von Stackelberg O, Kirsten R, Habermann N, Kratz M, Kauczor HU, Ulrich CM, Kaaks R, Kühn T.	Contemp Clin Trials. 2016 Nov;51:28-33. doi: 10.1016/j.cct.2016.09.004. Epub 2016 Sep 28.	Schübel R	Contemp Clin Trials	2016	2016-01-10			10.1016/j.cct.2016.09.004
27678438	Nigella sativa oil with a calorie-restricted diet can improve biomarkers of systemic inflammation in obese women: A randomized double-blind, placebo-controlled clinical trial	Mahdavi R, Namazi N, Alizadeh M, Farajnia S.	J Clin Lipidol. 2016 Sep-Oct;10(5):1203-11. doi: 10.1016/j.jacl.2015.11.019. Epub 2015 Dec 7.	Mahdavi R	J Clin Lipidol	2016	29/09/2016			10.1016/j.jacl.2015.11.019
27654602	Effect of Wearable Technology Combined With a Lifestyle Intervention on Long-term Weight Loss: The IDEA Randomized Clinical Trial	Jakicic JM, Davis KK, Rogers RJ, King WC, Marcus MD, Helsel D, Rickman AD, Wahed AS, Belle SH.	JAMA. 2016 Sep 20;316(11):1161-1171. doi: 10.1001/jama.2016.12858.	Jakicic JM	JAMA	2016	23/09/2016	PMC5480209	NIHMS854134	10.1001/jama.2016.12858
27650876	Effects of two diet techniques and delivery mode on weight loss, metabolic profile and food intake of obese adolescents: a fixed diet plan and a calorie-counting diet	Mendes MD, de Melo ME, Fernandes AE, Fujiwara CT, Pioltine MB, Teixeira A, Coelho K, Galasso M, Cercato C, Mancini MC.	Eur J Clin Nutr. 2017 Apr;71(4):549-551. doi: 10.1038/ejcn.2016.176. Epub 2016 Sep 21.	Mendes MD	Eur J Clin Nutr	2017	22/09/2016			10.1038/ejcn.2016.176
27643725	Short-term safety, tolerability and efficacy of a very low-calorie-ketogenic diet interventional weight loss program versus hypocaloric diet in patients with type 2 diabetes mellitus	Goday A, Bellido D, Sajoux I, Crujeiras AB, Burguera B, García-Luna PP, Oleaga A, Moreno B, Casanueva FF.	Nutr Diabetes. 2016 Sep 19;6(9):e230. doi: 10.1038/nutd.2016.36.	Goday A	Nutr Diabetes	2016	20/09/2016	PMC5048014		10.1038/nutd.2016.36
27638928	Effect of dietary modification by calorie restriction on cholesterol levels in lipoprotein(a) and other lipoprotein classes	Hirowatari Y, Manita D, Kamachi K, Tanaka A.	Ann Clin Biochem. 2017 Sep;54(5):567-576. doi: 10.1177/0004563216672247. Epub 2016 Sep 16.	Hirowatari Y	Ann Clin Biochem	2017	18/09/2016			10.1177/0004563216672247
27635676	Diet Quality of Breast Cancer Survivors after a Six-Month Weight Management Intervention: Improvements and Association with Weight Loss	Christifano DN, Fazzino TL, Sullivan DK, Befort CA.	Nutr Cancer. 2016 Nov-Dec;68(8):1301-1308. doi: 10.1080/01635581.2016.1224368. Epub 2016 Sep 16.	Christifano DN	Nutr Cancer	2016	17/09/2016	PMC5160017	NIHMS833279	10.1080/01635581.2016.1224368
27633639	Exploring effects of presurgical weight loss among women with stage 0-II breast cancer: protocol for a randomised controlled feasibility trial	Tsuruta Y, Rogers LQ, Krontiras H, Grizzle WE, Frugé AD, Oster RA, Umphrey HR, Jones LW, Azrad M, Demark-Wahnefried W.	BMJ Open. 2016 Sep 15;6(9):e012320. doi: 10.1136/bmjopen-2016-012320.	Tsuruta Y	BMJ Open	2016	17/09/2016	PMC5030610		10.1136/bmjopen-2016-012320
27634224	Renal and Systemic Effects of Calorie Restriction in Patients With Type 2 Diabetes With Abdominal Obesity: A Randomized Controlled Trial	Ruggenenti P, Abbate M, Ruggiero B, Rota S, Trillini M, Aparicio C, Parvanova A, Petrov Iliev I, Pisanu G, Perna A, Russo A, Diadei O, Martinetti D, Cannata A, Carrara F, Ferrari S, Stucchi N, Remuzzi G, Fontana L; C.RE.S.O. Study Group.	Diabetes. 2017 Jan;66(1):75-86. doi: 10.2337/db16-0607. Epub 2016 Sep 15.	Ruggenenti P	Diabetes	2017	17/09/2016			10.2337/db16-0607
27629851	Effect of a 3-Week Low-Calorie Diet and Balneological Treatment on Selected Coagulation Parameters in Morbidly Obese Patients	Firszt-Adamczyk A, Ruszkowska-Ciastek B, Adamczyk P, Szafkowski R, Firszt M, Ponikowska I, Moe K, Iwan-Ziętek I, Góralczyk B, Góralczyk K, Rość D.	Adv Clin Exp Med. 2016 Jul-Aug;25(4):755-61. doi: 10.17219/acem/42414.	Firszt-Adamczyk A	Adv Clin Exp Med	2016	16/09/2016			10.17219/acem/42414
27611582	Dietary restraint and weight loss as risk factors for eating pathology	Schaumberg K, Anderson D.	Eat Behav. 2016 Dec;23:97-103. doi: 10.1016/j.eatbeh.2016.08.009. Epub 2016 Aug 24.	Schaumberg K	Eat Behav	2016	2016-10-09			10.1016/j.eatbeh.2016.08.009
27605038	Circulating cytokines as determinants of weight loss-induced improvements in insulin sensitivity	Weiss EP, Reeds DN, Ezekiel UR, Albert SG, Villareal DT.	Endocrine. 2017 Jan;55(1):153-164. doi: 10.1007/s12020-016-1093-4. Epub 2016 Sep 7.	Weiss EP	Endocrine	2017	2016-09-09	PMC5226911	NIHMS815313	10.1007/s12020-016-1093-4
27599771	Polymorphism of neuropeptide Y gene rs16147 modifies the response to a hypocaloric diet on cardiovascular risk biomarkers and adipokines	de Luis DA, Izaola O, de la Fuente B, Primo D, Aller R.	J Hum Nutr Diet. 2017 Apr;30(2):159-165. doi: 10.1111/jhn.12406. Epub 2016 Sep 7.	de Luis DA	J Hum Nutr Diet	2017	2016-08-09			10.1111/jhn.12406
27591970	Effects of self-reported calorie restriction on correlations between SIRT1 polymorphisms and body mass index and long-term weight change	Higashibata T, Wakai K, Naito M, Morita E, Hishida A, Hamajima N, Hara M, Suzuki S, Hosono S, Takashima N, Ohnaka K, Takada A, Mikami H, Watanabe Y, Uemura H, Kubo M, Tanaka H.	Gene. 2016 Dec 5;594(1):16-22. doi: 10.1016/j.gene.2016.08.051. Epub 2016 Aug 31.	Higashibata T	Gene	2016	2016-05-09			10.1016/j.gene.2016.08.051
27589411	Permissive Underfeeding or Standard Enteral Feeding in High- and Low-Nutritional-Risk Critically Ill Adults. Post Hoc Analysis of the PermiT Trial	Arabi YM, Aldawood AS, Al-Dorzi HM, Tamim HM, Haddad SH, Jones G, McIntyre L, Solaiman O, Sakkijha MH, Sadat M, Mundekkadan S, Kumar A, Bagshaw SM, Mehta S; PermiT trial group.	Am J Respir Crit Care Med. 2017 Mar 1;195(5):652-662. doi: 10.1164/rccm.201605-1012OC.	Arabi YM	Am J Respir Crit Care Med	2017	2016-03-09			10.1164/rccm.201605-1012OC
27589584	Calorie restriction and not glucagon-like peptide-1 explains the acute improvement in glucose control after gastric bypass in Type 2 diabetes	Steven S, Hollingsworth KG, Small PK, Woodcock SA, Pucci A, Aribasala B, Al-Mrabeh A, Batterham RL, Taylor R.	Diabet Med. 2016 Dec;33(12):1723-1731. doi: 10.1111/dme.13257. Epub 2016 Oct 8.	Steven S	Diabet Med	2016	2016-03-09			10.1111/dme.13257
27581055	Macronutrient Intake-Associated FGF21 Genotype Modifies Effects of Weight-Loss Diets on 2-Year Changes of Central Adiposity and Body Composition: The POUNDS Lost Trial	Heianza Y, Ma W, Huang T, Wang T, Zheng Y, Smith SR, Bray GA, Sacks FM, Qi L.	Diabetes Care. 2016 Nov;39(11):1909-1914. doi: 10.2337/dc16-1111. Epub 2016 Aug 31.	Heianza Y	Diabetes Care	2016	2016-02-09	PMC5079612		10.2337/dc16-1111
27580151	Effects of Weight Loss on Lean Mass, Strength, Bone, and Aerobic Capacity	Weiss EP, Jordan RC, Frese EM, Albert SG, Villareal DT.	Med Sci Sports Exerc. 2017 Jan;49(1):206-217. doi: 10.1249/MSS.0000000000001074.	Weiss EP	Med Sci Sports Exerc	2017	2016-01-09	PMC5161655	NIHMS808674	10.1249/MSS.0000000000001074
27574117	Intersection of calorie restriction and magnesium in the suppression of genome-destabilizing RNA-DNA hybrids	Abraham KJ, Chan JN, Salvi JS, Ho B, Hall A, Vidya E, Guo R, Killackey SA, Liu N, Lee JE, Brown GW, Mekhail K.	Nucleic Acids Res. 2016 Oct 14;44(18):8870-8884. doi: 10.1093/nar/gkw752. Epub 2016 Aug 29.	Abraham KJ	Nucleic Acids Res	2016	31/08/2016	PMC5063000		10.1093/nar/gkw752
27573937	Short-term Effects of Laparoscopic Adjustable Gastric Banding Versus Roux-en-Y Gastric Bypass	Gastaldelli A, Iaconelli A, Gaggini M, Magnone MC, Veneziani A, Rubino F, Mingrone G.	Diabetes Care. 2016 Nov;39(11):1925-1931. doi: 10.2337/dc15-2823. Epub 2016 Aug 29.	Gastaldelli A	Diabetes Care	2016	31/08/2016			10.2337/dc15-2823
27570893	Health interest modulates brain reward responses to a perceived low-caloric beverage in females	van Rijn I, Wegman J, Aarts E, de Graaf C, Smeets PA.	Health Psychol. 2017 Jan;36(1):65-72. doi: 10.1037/hea0000411. Epub 2016 Aug 29.	van Rijn I	Health Psychol	2017	30/08/2016			10.1037/hea0000411
27569118	A randomized pilot study comparing zero-calorie alternate-day fasting to daily caloric restriction in adults with obesity	Catenacci VA, Pan Z, Ostendorf D, Brannon S, Gozansky WS, Mattson MP, Martin B, MacLean PS, Melanson EL, Troy Donahoo W.	Obesity (Silver Spring). 2016 Sep;24(9):1874-83. doi: 10.1002/oby.21581.	Catenacci VA	Obesity (Silver Spring)	2016	30/08/2016	PMC5042570	NIHMS793344	10.1002/oby.21581
27552206	AspireAssist--a new device for weight loss		Med Lett Drugs Ther. 2016 Aug 29;58(1502):109-10.		Med Lett Drugs Ther	2016	24/08/2016
27548732	The Effects of a Gluten-free Diet Versus a Hypocaloric Diet Among Patients With Fibromyalgia Experiencing Gluten Sensitivity-like Symptoms: A Pilot, Open-Label Randomized Clinical Trial	Slim M, Calandre EP, Garcia-Leiva JM, Rico-Villademoros F, Molina-Barea R, Rodriguez-Lopez CM, Morillas-Arques P.	J Clin Gastroenterol. 2017 Jul;51(6):500-507. doi: 10.1097/MCG.0000000000000651.	Slim M	J Clin Gastroenterol	2017	23/08/2016			10.1097/MCG.0000000000000651
27532343	Cultural factors influencing dietary and fluid restriction behaviour: perceptions of older Chinese patients with heart failure	Rong X, Peng Y, Yu HP, Li D.	J Clin Nurs. 2017 Mar;26(5-6):717-726. doi: 10.1111/jocn.13515. Epub 2016 Dec 5.	Rong X	J Clin Nurs	2017	18/08/2016			10.1111/jocn.13515
27524493	Diet-induced weight loss leads to a switch in gene regulatory network control in the rectal mucosa	Vargas AJ, Quackenbush J, Glass K.	Genomics. 2016 Oct;108(3-4):126-133. doi: 10.1016/j.ygeno.2016.08.001. Epub 2016 Aug 11.	Vargas AJ	Genomics	2016	16/08/2016	PMC5121035	NIHMS817277	10.1016/j.ygeno.2016.08.001
27520084	Caloric Restriction and Aging Bladder Dysfunction	Chai TC.	J Urol. 2016 Nov;196(5):1339. doi: 10.1016/j.juro.2016.08.013. Epub 2016 Aug 9.	Chai TC	J Urol	2016	14/08/2016			10.1016/j.juro.2016.08.013
27515448	Acyl-CoA synthetase long-chain 5 genotype is associated with body composition changes in response to lifestyle interventions in postmenopausal women with overweight and obesity: a genetic association study on cohorts Montréal-Ottawa New Emerging Team, and Complications Associated with Obesity	Rajkumar A, Lamothe G, Bolongo P, Harper ME, Adamo K, Doucet É, Rabasa-Lhoret R, Prud'homme D, Tesson F.	BMC Med Genet. 2016 Aug 11;17(1):56. doi: 10.1186/s12881-016-0320-4.	Rajkumar A	BMC Med Genet	2016	13/08/2016	PMC4982019		10.1186/s12881-016-0320-4
27507611	Effects of dietary supplementation with EPA and/or α-lipoic acid on adipose tissue transcriptomic profile of healthy overweight/obese women following a hypocaloric diet	Huerta AE, Prieto-Hontoria PL, Fernández-Galilea M, Escoté X, Martínez JA, Moreno-Aliaga MJ.	Biofactors. 2017 Jan 2;43(1):117-131. doi: 10.1002/biof.1317. Epub 2016 Aug 10.	Huerta AE	Biofactors	2017	2016-11-08			10.1002/biof.1317
27494531	Predictors of Diet-Induced Weight Loss in Overweight Adults with Type 2 Diabetes	Berk KA, Mulder MT, Verhoeven AJ, van Wietmarschen H, Boessen R, Pellis LP, van T Spijker A, Timman R, Ozcan B, Sijbrands EJ.	PLoS One. 2016 Aug 5;11(8):e0160774. doi: 10.1371/journal.pone.0160774. eCollection 2016.	Berk KA	PLoS One	2016	2016-06-08	PMC4975507		10.1371/journal.pone.0160774
27490919	Energy Metabolic Adaptation and Cardiometabolic Improvements One Year After Gastric Bypass, Sleeve Gastrectomy, and Gastric Band	Tam CS, Redman LM, Greenway F, LeBlanc KA, Haussmann MG, Ravussin E.	J Clin Endocrinol Metab. 2016 Oct;101(10):3755-3764. doi: 10.1210/jc.2016-1814. Epub 2016 Aug 4.	Tam CS	J Clin Endocrinol Metab	2016	2016-05-08	PMC6459006		10.1210/jc.2016-1814
27486926	Directive and non-directive food-related parenting practices: Associations between an expanded conceptualization of food-related parenting practices and child dietary intake and weight outcomes	Loth KA, Friend S, Horning ML, Neumark-Sztainer D, Fulkerson JA.	Appetite. 2016 Dec 1;107:188-195. doi: 10.1016/j.appet.2016.07.036. Epub 2016 Jul 31.	Loth KA	Appetite	2016	2016-04-08	PMC5112107	NIHMS811128	10.1016/j.appet.2016.07.036
27483317	Protein-Pacing Caloric-Restriction Enhances Body Composition Similarly in Obese Men and Women during Weight Loss and Sustains Efficacy during Long-Term Weight Maintenance	Arciero PJ, Edmonds R, He F, Ward E, Gumpricht E, Mohr A, Ormsbee MJ, Astrup A.	Nutrients. 2016 Jul 30;8(8):476. doi: 10.3390/nu8080476.	Arciero PJ	Nutrients	2016	2016-03-08	PMC4997389		10.3390/nu8080476
27465775	Substantial Life Extension and the Fair Distribution of Healthspans	Wareham CS.	J Med Philos. 2016 Oct;41(5):521-39. doi: 10.1093/jmp/jhw021. Epub 2016 Jul 26.	Wareham CS	J Med Philos	2016	29/07/2016			10.1093/jmp/jhw021
27465384	Effects of matched weight loss from calorie restriction, exercise, or both on cardiovascular disease risk factors: a randomized intervention trial	Weiss EP, Albert SG, Reeds DN, Kress KS, McDaniel JL, Klein S, Villareal DT.	Am J Clin Nutr. 2016 Sep;104(3):576-86. doi: 10.3945/ajcn.116.131391. Epub 2016 Jul 27.	Weiss EP	Am J Clin Nutr	2016	29/07/2016	PMC4997297		10.3945/ajcn.116.131391
27455602	[Assessment of efficiency of the personalized therapy of patients with obesity and diabetes mellitus 2 types appointed on the basis of studying rs5219 polymorphism of KCNJ11 gene]	Lapik IA, Gapparova KM, Sharafetdinov KhKh, Sorokina EY, Sentsova TB, Plotnikova OA, Chekhonina YG.	Vopr Pitan. 2016;85(2):61-6.	Lapik IA	Vopr Pitan	2016	27/07/2016
27430587	Impact on weight and physical function of intensive medical weight loss in older adults with stage II and III obesity	Ard JD, Cook M, Rushing J, Frain A, Beavers K, Miller G, Miller ME, Nicklas B.	Obesity (Silver Spring). 2016 Sep;24(9):1861-6. doi: 10.1002/oby.21569. Epub 2016 Jul 19.	Ard JD	Obesity (Silver Spring)	2016	20/07/2016	PMC5536247	NIHMS883280	10.1002/oby.21569
27430417	Voxel-based morphometry reveals brain gray matter volume changes in successful dieters	Honea RA, Szabo-Reed AN, Lepping RJ, Perea R, Breslin F, Martin LE, Brooks WM, Donnelly JE, Savage CR.	Obesity (Silver Spring). 2016 Sep;24(9):1842-8. doi: 10.1002/oby.21551. Epub 2016 Jul 19.	Honea RA	Obesity (Silver Spring)	2016	20/07/2016	PMC5003724	NIHMS784761	10.1002/oby.21551
27433802	Stage-Specific MicroRNAs and Their Role in the Anticancer Effects of Calorie Restriction in a Rat Model of ER-Positive Luminal Breast Cancer	Devlin KL, Sanford T, Harrison LM, LeBourgeois P, Lashinger LM, Mambo E, Hursting SD.	PLoS One. 2016 Jul 19;11(7):e0159686. doi: 10.1371/journal.pone.0159686. eCollection 2016.	Devlin KL	PLoS One	2016	20/07/2016	PMC4951048		10.1371/journal.pone.0159686
27411589	Caloric Restriction Mimetics Enhance Anticancer Immunosurveillance	Pietrocola F, Pol J, Vacchelli E, Rao S, Enot DP, Baracco EE, Levesque S, Castoldi F, Jacquelot N, Yamazaki T, Senovilla L, Marino G, Aranda F, Durand S, Sica V, Chery A, Lachkar S, Sigl V, Bloy N, Buque A, Falzoni S, Ryffel B, Apetoh L, Di Virgilio F, Madeo F, Maiuri MC, Zitvogel L, Levine B, Penninger JM, Kroemer G.	Cancer Cell. 2016 Jul 11;30(1):147-160. doi: 10.1016/j.ccell.2016.05.016.	Pietrocola F	Cancer Cell	2016	15/07/2016	PMC5715805	NIHMS921177	10.1016/j.ccell.2016.05.016
27410480	Long-term moderate calorie restriction inhibits inflammation without impairing cell-mediated immunity: a randomized controlled trial in non-obese humans	Meydani SN, Das SK, Pieper CF, Lewis MR, Klein S, Dixit VD, Gupta AK, Villareal DT, Bhapkar M, Huang M, Fuss PJ, Roberts SB, Holloszy JO, Fontana L.	Aging (Albany NY). 2016 Jul;8(7):1416-31. doi: 10.18632/aging.100994.	Meydani SN	Aging (Albany NY)	2016	14/07/2016	PMC4993339		10.18632/aging.100994
27401729	Childhood socioeconomic disadvantage is associated with lower mortality in older Japanese men: the JAGES cohort study	Tani Y, Kondo N, Nagamine Y, Shinozaki T, Kondo K, Kawachi I, Fujiwara T.	Int J Epidemiol. 2016 Aug;45(4):1226-1235. doi: 10.1093/ije/dyw146. Epub 2016 Jul 10.	Tani Y	Int J Epidemiol	2016	13/07/2016	PMC5965916		10.1093/ije/dyw146
27394413	Circulating adipocyte-derived extracellular vesicles are novel markers of metabolic stress	Eguchi A, Lazic M, Armando AM, Phillips SA, Katebian R, Maraka S, Quehenberger O, Sears DD, Feldstein AE.	J Mol Med (Berl). 2016 Nov;94(11):1241-1253. doi: 10.1007/s00109-016-1446-8. Epub 2016 Jul 9.	Eguchi A	J Mol Med (Berl)	2016	2016-11-07	PMC5071132	NIHMS801969	10.1007/s00109-016-1446-8
27393234	Effect of weight loss induced by energy restriction on measures of arterial compliance: A systematic review and meta-analysis	Rodriguez AJ, Scott D, Ebeling P.	Atherosclerosis. 2016 Sep;252:201-202. doi: 10.1016/j.atherosclerosis.2016.06.043. Epub 2016 Jun 30.	Rodriguez AJ	Atherosclerosis	2016	2016-10-07			10.1016/j.atherosclerosis.2016.06.043
27392574	The Three False Dawns of Biomedical Gerontology	de Grey AD.	Rejuvenation Res. 2016 Aug;19(4):271-2. doi: 10.1089/rej.2016.1862.	de Grey AD	Rejuvenation Res	2016	2016-10-07			10.1089/rej.2016.1862
27388985	Stem cells: Calorie restriction affects intestinal cells	Greenhill C.	Nat Rev Endocrinol. 2016 Sep;12(9):496. doi: 10.1038/nrendo.2016.112. Epub 2016 Jul 8.	Greenhill C	Nat Rev Endocrinol	2016	2016-09-07			10.1038/nrendo.2016.112
27387696	Improved glucose metabolism after gastric bypass: evolution of the paradigm	Pournaras DJ, Nygren J, Hagström-Toft E, Arner P, le Roux CW, Thorell A.	Surg Obes Relat Dis. 2016 Sep-Oct;12(8):1457-1465. doi: 10.1016/j.soard.2016.03.020. Epub 2016 Mar 23.	Pournaras DJ	Surg Obes Relat Dis	2016	2016-09-07			10.1016/j.soard.2016.03.020
27381607	Dietary Protective Effects Against Hepatocellular Carcinoma Development in Mdr2-/- Knockout Mice	Gentileschi MP, Lattanzio C, Menicagli F, Vincenzi B, Cigliana G, Baldi A, Blandino G, Muti P, Fanciulli M, Spugnini EP.	In Vivo. 2016 Jul-Aug;30(4):445-50.	Gentileschi MP	In Vivo	2016	2016-07-07
27376321	Dairy Intake Enhances Body Weight and Composition Changes during Energy Restriction in 18-50-Year-Old Adults-A Meta-Analysis of Randomized Controlled Trials	Stonehouse W, Wycherley T, Luscombe-Marsh N, Taylor P, Brinkworth G, Riley M.	Nutrients. 2016 Jul 1;8(7):394. doi: 10.3390/nu8070394.	Stonehouse W	Nutrients	2016	2016-05-07	PMC4963870		10.3390/nu8070394
27357801	Regulation of fetal liver growth in a model of diet restriction in the pregnant rat	Boylan JM, Sanders JA, Gruppuso PA.	Am J Physiol Regul Integr Comp Physiol. 2016 Sep 1;311(3):R478-88. doi: 10.1152/ajpregu.00138.2016. Epub 2016 Jun 29.	Boylan JM	Am J Physiol Regul Integr Comp Physiol	2016	2016-01-07	PMC5142219		10.1152/ajpregu.00138.2016
27358422	Greater Healthful Dietary Variety Is Associated with Greater 2-Year Changes in Weight and Adiposity in the Preventing Overweight Using Novel Dietary Strategies (POUNDS Lost) Trial	Vadiveloo M, Sacks FM, Champagne CM, Bray GA, Mattei J.	J Nutr. 2016 Aug;146(8):1552-9. doi: 10.3945/jn.115.224683. Epub 2016 Jun 29.	Vadiveloo M	J Nutr	2016	2016-01-07	PMC4958287		10.3945/jn.115.224683
27356202	Removing energy from a beverage influences later food intake more than the same energy addition	McCrickerd K, Salleh NB, Forde CG.	Appetite. 2016 Oct 1;105:549-56. doi: 10.1016/j.appet.2016.06.030. Epub 2016 Jun 26.	McCrickerd K	Appetite	2016	30/06/2016			10.1016/j.appet.2016.06.030
27349707	Taking control: Working memory training in overweight individuals increases self-regulation of food intake	Houben K, Dassen FC, Jansen A.	Appetite. 2016 Oct 1;105:567-74. doi: 10.1016/j.appet.2016.06.029. Epub 2016 Jun 25.	Houben K	Appetite	2016	29/06/2016			10.1016/j.appet.2016.06.029
27340200	Daily leptin blunts marrow fat but does not impact bone mass in calorie-restricted mice	Devlin MJ, Brooks DJ, Conlon C, Vliet Mv, Louis L, Rosen CJ, Bouxsein ML.	J Endocrinol. 2016 Jun;229(3):295-306. doi: 10.1530/JOE-15-0473.	Devlin MJ	J Endocrinol	2016	25/06/2016	PMC5171226	NIHMS833041	10.1530/JOE-15-0473
27339607	No effect of 24 h severe energy restriction on appetite regulation and ad libitum energy intake in overweight and obese males	Clayton DJ, Creese M, Skidmore N, Stensel DJ, James LJ.	Int J Obes (Lond). 2016 Nov;40(11):1662-1670. doi: 10.1038/ijo.2016.106. Epub 2016 Jun 24.	Clayton DJ	Int J Obes (Lond)	2016	25/06/2016			10.1038/ijo.2016.106
27334236	Long-term effects of weight reduction on the severity of psoriasis in a cohort derived from a randomized trial: a prospective observational follow-up study	Jensen P, Christensen R, Zachariae C, Geiker NR, Schaadt BK, Stender S, Hansen PR, Astrup A, Skov L.	Am J Clin Nutr. 2016 Aug;104(2):259-65. doi: 10.3945/ajcn.115.125849. Epub 2016 Jun 22.	Jensen P	Am J Clin Nutr	2016	24/06/2016			10.3945/ajcn.115.125849
27336206	Feasibility of a brief, intensive weight loss intervention to improve reproductive outcomes in obese, subfertile women: a pilot study	Rothberg A, Lanham M, Randolph J, Fowler C, Miller N, Smith Y.	Fertil Steril. 2016 Oct;106(5):1212-1220. doi: 10.1016/j.fertnstert.2016.06.004. Epub 2016 Jun 20.	Rothberg A	Fertil Steril	2016	24/06/2016	PMC5797426	NIHMS933904	10.1016/j.fertnstert.2016.06.004
27327806	Diet and Exercise for Obese Patients With Heart Failure	Farmakis D, Parissis J, Filippatos G.	JAMA. 2016 Jun 21;315(23):2618-9. doi: 10.1001/jama.2016.2915.	Farmakis D	JAMA	2016	22/06/2016			10.1001/jama.2016.2915
27327807	Diet and Exercise for Obese Patients With Heart Failure--Reply	Kitzman DW, Haykowsky MJ, Kraus W.	JAMA. 2016 Jun 21;315(23):2619-20. doi: 10.1001/jama.2016.2924.	Kitzman DW	JAMA	2016	22/06/2016			10.1001/jama.2016.2924
27325036	Insulin resistance - the body's defence against caloric intoxication?	Methi T, Thorsby PM.	Tidsskr Nor Laegeforen. 2016 Jun 21;136(11):1015-7. doi: 10.4045/tidsskr.16.0259. eCollection 2016 Jun.	Methi T	Tidsskr Nor Laegeforen	2016	22/06/2016			10.4045/tidsskr.16.0259
27314458	Treatment with Optifast reduces hepatic steatosis and increases candidacy rates for living donor liver transplantation	Doyle A, Adeyi O, Khalili K, Fischer S, Dib M, Goldaracena N, Dillon J, Grant D, Cattral M, McGilvray I, Greig P, Ghanekar A, Lilly L, Renner E, Levy G, Selzner N.	Liver Transpl. 2016 Sep;22(9):1295-300. doi: 10.1002/lt.24495.	Doyle A	Liver Transpl	2016	18/06/2016			10.1002/lt.24495
27311378	The portion size effect on food intake is robust to contextual size information	Reily NM, Vartanian LR.	Appetite. 2016 Oct 1;105:439-48. doi: 10.1016/j.appet.2016.06.015. Epub 2016 Jun 14.	Reily NM	Appetite	2016	18/06/2016			10.1016/j.appet.2016.06.015
27312699	Energy restriction and Roux-en-Y gastric bypass reduce postprandial α-dicarbonyl stress in obese women with type 2 diabetes	Maessen DE, Hanssen NM, Lips MA, Scheijen JL, Willems van Dijk K, Pijl H, Stehouwer CD, Schalkwijk CG.	Diabetologia. 2016 Sep;59(9):2013-7. doi: 10.1007/s00125-016-4009-1. Epub 2016 Jun 16.	Maessen DE	Diabetologia	2016	18/06/2016	PMC4969347		10.1007/s00125-016-4009-1
27306267	The Sleep/Wake Cycle is Directly Modulated by Changes in Energy Balance	Collet TH, van der Klaauw AA, Henning E, Keogh JM, Suddaby D, Dachi SV, Dunbar S, Kelway S, Dickson SL, Farooqi IS, Schmid SM.	Sleep. 2016 Sep 1;39(9):1691-700. doi: 10.5665/sleep.6094.	Collet TH	Sleep	2016	17/06/2016	PMC4989258		10.5665/sleep.6094
27304491	Focus on Aging		Cell Metab. 2016 Jun 14;23(6):951-956. doi: 10.1016/j.cmet.2016.05.021.		Cell Metab	2016	16/06/2016			10.1016/j.cmet.2016.05.021
27281304	A weight-loss program adapted to the menstrual cycle increases weight loss in healthy, overweight, premenopausal women: a 6-mo randomized controlled trial	Geiker NR, Ritz C, Pedersen SD, Larsen TM, Hill JO, Astrup A.	Am J Clin Nutr. 2016 Jul;104(1):15-20. doi: 10.3945/ajcn.115.126565. Epub 2016 Jun 8.	Geiker NR	Am J Clin Nutr	2016	2016-10-06			10.3945/ajcn.115.126565
27270210	Evaluation of the ability of three physical activity monitors to predict weight change and estimate energy expenditure	Correa JB, Apolzan JW, Shepard DN, Heil DP, Rood JC, Martin CK.	Appl Physiol Nutr Metab. 2016 Jul;41(7):758-66. doi: 10.1139/apnm-2015-0461. Epub 2016 Mar 14.	Correa JB	Appl Physiol Nutr Metab	2016	2016-09-06	PMC4936932	NIHMS796750	10.1139/apnm-2015-0461
27264606	Lifespan Control by Redox-Dependent Recruitment of Chaperones to Misfolded Proteins	Hanzén S, Vielfort K, Yang J, Roger F, Andersson V, Zamarbide-Forés S, Andersson R, Malm L, Palais G, Biteau B, Liu B, Toledano MB, Molin M, Nyström T.	Cell. 2016 Jun 30;166(1):140-51. doi: 10.1016/j.cell.2016.05.006. Epub 2016 Jun 2.	Hanzén S	Cell	2016	2016-07-06			10.1016/j.cell.2016.05.006
27258913	Preoperative Very Low-Calorie Diet Reduces Technical Difficulty During Laparoscopic Cholecystectomy in Obese Patients	Jones AD, Waterland PW, Powell-Brett S, Super P, Richardson M, Bowley D.	Surg Laparosc Endosc Percutan Tech. 2016 Jun;26(3):226-9. doi: 10.1097/SLE.0000000000000278.	Jones AD	Surg Laparosc Endosc Percutan Tech	2016	2016-04-06			10.1097/SLE.0000000000000278
27245991	Association of endothelial proliferation with the magnitude of weight loss during calorie restriction	Korybalska K, Swora-Cwynar E, Łuczak J, Kanikowska A, Czepulis N, Rutkowski R, Bręborowicz A, Grzymisławski M, Witowski J.	Angiogenesis. 2016 Jul;19(3):407-19. doi: 10.1007/s10456-016-9516-7. Epub 2016 May 31.	Korybalska K	Angiogenesis	2016	2016-02-06			10.1007/s10456-016-9516-7
27242218	A short-duration restrictive diet reduces visceral adiposity in the morbidly obese surgical patient	Cleveland E, Peirce G, Brown S, Freemyer J, Rice W, Lee L, Coviello L, Davis KG.	Am J Surg. 2016 Nov;212(5):927-930. doi: 10.1016/j.amjsurg.2016.01.040. Epub 2016 May 7.	Cleveland E	Am J Surg	2016	2016-01-06			10.1016/j.amjsurg.2016.01.040
27235824	A prime a day keeps calories away: The effects of supraliminal priming on food consumption and the moderating role of gender and eating restraint	Minas RK, Poor M, Dennis AR, Bartelt VL.	Appetite. 2016 Oct 1;105:494-9. doi: 10.1016/j.appet.2016.05.022. Epub 2016 May 26.	Minas RK	Appetite	2016	29/05/2016			10.1016/j.appet.2016.05.022
27233359	Intermittent energy restriction induces changes in breast gene expression and systemic metabolism	Harvie MN, Sims AH, Pegington M, Spence K, Mitchell A, Vaughan AA, Allwood JW, Xu Y, Rattray NJ, Goodacre R, Evans DG, Mitchell E, McMullen D, Clarke RB, Howell A.	Breast Cancer Res. 2016 May 28;18(1):57. doi: 10.1186/s13058-016-0714-4.	Harvie MN	Breast Cancer Res	2016	29/05/2016	PMC4884347		10.1186/s13058-016-0714-4
27222547	Mechanisms of Diabetes Improvement Following Bariatric/Metabolic Surgery	Batterham RL, Cummings DE.	Diabetes Care. 2016 Jun;39(6):893-901. doi: 10.2337/dc16-0145.	Batterham RL	Diabetes Care	2016	26/05/2016	PMC5864134		10.2337/dc16-0145
27221771	Efficacy of an orlistat-resveratrol combination for weight loss in subjects with obesity: A randomized controlled trial	Arzola-Paniagua MA, García-Salgado López ER, Calvo-Vargas CG, Guevara-Cruz M.	Obesity (Silver Spring). 2016 Jul;24(7):1454-63. doi: 10.1002/oby.21523. Epub 2016 May 25.	Arzola-Paniagua MA	Obesity (Silver Spring)	2016	26/05/2016			10.1002/oby.21523
27216819	Acute and short-term effects of caloric restriction on metabolic profile and brain activation in obese, postmenopausal women	Jakobsdottir S, van Nieuwpoort IC, van Bunderen CC, de Ruiter MB, Twisk JW, Deijen JB, Veltman DJ, Drent ML.	Int J Obes (Lond). 2016 Nov;40(11):1671-1678. doi: 10.1038/ijo.2016.103. Epub 2016 May 24.	Jakobsdottir S	Int J Obes (Lond)	2016	25/05/2016			10.1038/ijo.2016.103
27213441	Short-Term Preoperative Calorie and Protein Restriction Is Feasible in Healthy Kidney Donors and Morbidly Obese Patients Scheduled for Surgery	Jongbloed F, de Bruin RW, Klaassen RA, Beekhof P, van Steeg H, Dor FJ, van der Harst E, Dollé ME, IJzermans JN.	Nutrients. 2016 May 20;8(5):306. doi: 10.3390/nu8050306.	Jongbloed F	Nutrients	2016	24/05/2016	PMC4882718		10.3390/nu8050306
27208593	Impulse control and restrained eating among young women: Evidence for compensatory cortical activation during a chocolate-specific delayed discounting task	Dong D, Wang Y, Jackson T, Chen S, Wang Y, Zhou F, Chen H.	Appetite. 2016 Oct 1;105:477-86. doi: 10.1016/j.appet.2016.05.017. Epub 2016 May 18.	Dong D	Appetite	2016	22/05/2016			10.1016/j.appet.2016.05.017
27197769	Effect of Exercise and Calorie Restriction on Tissue Acylcarnitines, Tissue Desaturase Indices, and Fat Accumulation in Diet-Induced Obese Rats	Gopalan V, Michael N, Ishino S, Lee SS, Yang AY, Bhanu Prakash KN, Yaligar J, Sadananthan SA, Kaneko M, Zhou Z, Satomi Y, Hirayama M, Kamiguchi H, Zhu B, Horiguchi T, Nishimoto T, Velan SS.	Sci Rep. 2016 May 20;6:26445. doi: 10.1038/srep26445.	Gopalan V	Sci Rep	2016	21/05/2016	PMC4873816		10.1038/srep26445
27193396	An observational study of sequential protein-sparing, very low-calorie ketogenic diet (Oloproteic diet) and hypocaloric Mediterranean-like diet for the treatment of obesity	Castaldo G, Monaco L, Castaldo L, Galdo G, Cereda E.	Int J Food Sci Nutr. 2016 Sep;67(6):696-706. doi: 10.1080/09637486.2016.1186157. Epub 2016 May 18.	Castaldo G	Int J Food Sci Nutr	2016	20/05/2016			10.1080/09637486.2016.1186157
27175106	The data do not seem to support a benefit to BCAA supplementation during periods of caloric restriction	Dieter BP, Schoenfeld BJ, Aragon AA.	J Int Soc Sports Nutr. 2016 May 11;13:21. doi: 10.1186/s12970-016-0128-9. eCollection 2016.	Dieter BP	J Int Soc Sports Nutr	2016	14/05/2016	PMC4865017		10.1186/s12970-016-0128-9
27175804	Effects of a multidisciplinary body weight reduction program on static and dynamic thoraco-abdominal volumes in obese adolescents	LoMauro A, Cesareo A, Agosti F, Tringali G, Salvadego D, Grassi B, Sartorio A, Aliverti A.	Appl Physiol Nutr Metab. 2016 Jun;41(6):649-58. doi: 10.1139/apnm-2015-0269. Epub 2016 Feb 18.	LoMauro A	Appl Physiol Nutr Metab	2016	14/05/2016			10.1139/apnm-2015-0269
27173472	ANP system activity predicts variability of fat mass reduction and insulin sensitivity during weight loss	Brachs M, Wiegand S, Leupelt V, Ernert A, Kintscher U, Jumpertz von Schwarzenberg R, Decker AM, Bobbert T, Hübner N, Chen W, Krude H, Spranger J, Mai K.	Metabolism. 2016 Jun;65(6):935-43. doi: 10.1016/j.metabol.2016.03.013. Epub 2016 Apr 7.	Brachs M	Metabolism	2016	14/05/2016			10.1016/j.metabol.2016.03.013
27169833	Low energy intake plus low energy expenditure (low energy flux), not energy surfeit, predicts future body fat gain	Hume DJ, Yokum S, Stice E.	Am J Clin Nutr. 2016 Jun;103(6):1389-96. doi: 10.3945/ajcn.115.127753. Epub 2016 May 11.	Hume DJ	Am J Clin Nutr	2016	13/05/2016	PMC4880998		10.3945/ajcn.115.127753
27169897	Exercise coupled with dietary restriction reduces oxidative stress in male adolescents with obesity	Li C, Feng F, Xiong X, Li R, Chen N.	J Sports Sci. 2017 Apr;35(7):663-668. doi: 10.1080/02640414.2016.1183807. Epub 2016 May 12.	Li C	J Sports Sci	2017	13/05/2016			10.1080/02640414.2016.1183807
27156267	The Perils of Skipping Breakfast	Nisselson HS.	J N J Dent Assoc. 2015 Fall;86(4):4.	Nisselson HS	J N J Dent Assoc	2015	2016-10-05
27154810	A randomised, single blinded trial, assessing the effect of a two week preoperative very low calorie diet on laparoscopic cholecystectomy in obese patients	Burnand KM, Lahiri RP, Burr N, Jansen van Rensburg L, Lewis MP.	HPB (Oxford). 2016 May;18(5):456-61. doi: 10.1016/j.hpb.2016.01.545. Epub 2016 Mar 8.	Burnand KM	HPB (Oxford)	2016	2016-08-05	PMC4857069		10.1016/j.hpb.2016.01.545
27146364	Influence of moderate maternal nutrition restriction on the fetal baboon metabolome at 0.5 and 0.9 gestation	Hellmuth C, Uhl O, Kirchberg FF, Harder U, Peissner W, Koletzko B, Nathanielsz PW.	Nutr Metab Cardiovasc Dis. 2016 Sep;26(9):786-96. doi: 10.1016/j.numecd.2016.04.004. Epub 2016 Apr 14.	Hellmuth C	Nutr Metab Cardiovasc Dis	2016	2016-06-05			10.1016/j.numecd.2016.04.004
27145958	Mediterranean versus vegetarian diet for cardiovascular disease prevention (the CARDIVEG study): study protocol for a randomized controlled trial	Sofi F, Dinu M, Pagliai G, Cesari F, Marcucci R, Casini A.	Trials. 2016 May 4;17(1):233. doi: 10.1186/s13063-016-1353-x.	Sofi F	Trials	2016	2016-06-05	PMC4855805		10.1186/s13063-016-1353-x
27145005	Bisphenol A Promotes Adiposity and Inflammation in a Nonmonotonic Dose-response Way in 5-week-old Male and Female C57BL/6J Mice Fed a Low-calorie Diet	Yang M, Chen M, Wang J, Xu M, Sun J, Ding L, Lv X, Ma Q, Bi Y, Liu R, Hong J, Ning G.	Endocrinology. 2016 Jun;157(6):2333-45. doi: 10.1210/en.2015-1926. Epub 2016 May 4.	Yang M	Endocrinology	2016	2016-05-05			10.1210/en.2015-1926
27142672	Impact of Hypocaloric Hyperproteic Diet on Gut Microbiota in Overweight or Obese Patients with Nonalcoholic Fatty Liver Disease: A Pilot Study	Pataky Z, Genton L, Spahr L, Lazarevic V, Terraz S, Gaïa N, Rubbia-Brandt L, Golay A, Schrenzel J, Pichard C.	Dig Dis Sci. 2016 Sep;61(9):2721-31. doi: 10.1007/s10620-016-4179-1. Epub 2016 May 3.	Pataky Z	Dig Dis Sci	2016	2016-05-05			10.1007/s10620-016-4179-1
27136347	Effect of Calorie Restriction on Mood, Quality of Life, Sleep, and Sexual Function in Healthy Nonobese Adults: The CALERIE 2 Randomized Clinical Trial	Martin CK, Bhapkar M, Pittas AG, Pieper CF, Das SK, Williamson DA, Scott T, Redman LM, Stein R, Gilhooly CH, Stewart T, Robinson L, Roberts SB; Comprehensive Assessment of Long-term Effects of Reducing Intake of Energy (CALERIE) Phase 2 Study Group.	JAMA Intern Med. 2016 Jun 1;176(6):743-52. doi: 10.1001/jamainternmed.2016.1189.	Martin CK	JAMA Intern Med	2016	2016-03-05	PMC4905696	NIHMS785524	10.1001/jamainternmed.2016.1189
27136446	The blunted effect of glucose-dependent insulinotropic polypeptide in subcutaneous abdominal adipose tissue in obese subjects is partly reversed by weight loss	Asmar M, Arngrim N, Simonsen L, Asmar A, Nordby P, Holst JJ, Bülow J.	Nutr Diabetes. 2016 May 2;6(5):e208. doi: 10.1038/nutd.2016.15.	Asmar M	Nutr Diabetes	2016	2016-03-05	PMC4895376		10.1038/nutd.2016.15
27135654	Angiopoietin-like protein 6 in patients with obesity, type 2 diabetes mellitus, and anorexia nervosa: The influence of very low-calorie diet, bariatric surgery, and partial realimentation	Cinkajzlova A, Lacinova Z, Klouckova J, Kavalkova P, Trachta P, Kosak M, Haluzikova D, Papezova H, Mraz M, Haluzík M.	Endocr Res. 2017 Feb;42(1):22-30. doi: 10.3109/07435800.2016.1169544. Epub 2016 May 2.	Cinkajzlova A	Endocr Res	2017	2016-03-05			10.3109/07435800.2016.1169544
27117144	Effect of DHA supplementation in a very low-calorie ketogenic diet in the treatment of obesity: a randomized clinical trial	de Luis D, Domingo JC, Izaola O, Casanueva FF, Bellido D, Sajoux I.	Endocrine. 2016 Oct;54(1):111-122. doi: 10.1007/s12020-016-0964-z. Epub 2016 Apr 27.	de Luis D	Endocrine	2016	28/04/2016			10.1007/s12020-016-0964-z
27117850	The Effects of a Hypocaloric Diet on Diet-Induced Thermogenesis and Blood Hormone Response in Healthy Male Adults: A Pilot Study	Ishii S, Osaki N, Shimotoyodome A.	J Nutr Sci Vitaminol (Tokyo). 2016;62(1):40-6. doi: 10.3177/jnsv.62.40.	Ishii S	J Nutr Sci Vitaminol (Tokyo)	2016	28/04/2016			10.3177/jnsv.62.40
27107842	The effect of a vegetarian versus conventional hypocaloric diet on serum concentrations of persistent organic pollutants in patients with type 2 diabetes	Kahleova H, Tonstad S, Rosmus J, Fisar P, Mari A, Hill M, Pelikanova T.	Nutr Metab Cardiovasc Dis. 2016 May;26(5):430-8. doi: 10.1016/j.numecd.2016.01.008. Epub 2016 Jan 28.	Kahleova H	Nutr Metab Cardiovasc Dis	2016	25/04/2016			10.1016/j.numecd.2016.01.008
27095593	Enhanced responsiveness of Ghsr Q343X rats to ghrelin results in enhanced adiposity without increased appetite	Chebani Y, Marion C, Zizzari P, Chettab K, Pastor M, Korostelev M, Geny D, Epelbaum J, Tolle V, Morisset-Lopez S, Pantel J.	Sci Signal. 2016 Apr 19;9(424):ra39. doi: 10.1126/scisignal.aae0374.	Chebani Y	Sci Signal	2016	21/04/2016			10.1126/scisignal.aae0374
27089996	Diffuse optical spectroscopic imaging of subcutaneous adipose tissue metabolic changes during weight loss	Ganesan G, Warren RV, Leproux A, Compton M, Cutler K, Wittkopp S, Tran G, O'Sullivan T, Malik S, Galassetti PR, Tromberg BJ.	Int J Obes (Lond). 2016 Aug;40(8):1292-300. doi: 10.1038/ijo.2016.43. Epub 2016 Apr 22.	Ganesan G	Int J Obes (Lond)	2016	20/04/2016	PMC4970874	NIHMS767996	10.1038/ijo.2016.43
27088096	Long-Term Follow-Up of the Telemonitoring Weight-Reduction Program "Active Body Control"	Stumm G, Blaik A, Kropf S, Westphal S, Hantke TK, Luley C.	J Diabetes Res. 2016;2016:3798729. doi: 10.1155/2016/3798729. Epub 2016 Mar 21.	Stumm G	J Diabetes Res	2016	19/04/2016	PMC4819117		10.1155/2016/3798729
27070750	Plasma concentrations and subcutaneous adipose tissue mRNA expression of clusterin in obesity and type 2 diabetes mellitus: the effect of short-term hyperinsulinemia, very-low-calorie diet and bariatric surgery	Kloučková J, Lacinová Z, Kaválková P, Trachta P, Kasalický M, Haluzíková D, Mráz M, Haluzík M.	Physiol Res. 2016 Jul 18;65(3):481-92. doi: 10.33549/physiolres.933121. Epub 2016 Apr 12.	Kloučková J	Physiol Res	2016	13/04/2016			10.33549/physiolres.933121
27052926	HDL functionality in South Asians as compared to white Caucasians	Bakker LE, Boon MR, Annema W, Dikkers A, van Eyk HJ, Verhoeven A, Mayboroda OA, Jukema JW, Havekes LM, Meinders AE, Willems van Dijk K, Jazet IM, Tietge UJ, Rensen PC.	Nutr Metab Cardiovasc Dis. 2016 Aug;26(8):697-705. doi: 10.1016/j.numecd.2016.02.010. Epub 2016 Feb 19.	Bakker LE	Nutr Metab Cardiovasc Dis	2016	2016-08-04			10.1016/j.numecd.2016.02.010
27040156	Meal replacements as a strategy for weight loss in obese hemodialysis patients	Lassemillante AM, Oliver V, Hickman I, Murray E, Campbell KL.	Hemodial Int. 2016 Oct;20(4):E18-E23. doi: 10.1111/hdi.12419. Epub 2016 Apr 4.	Lassemillante AM	Hemodial Int	2016	2016-05-04			10.1111/hdi.12419
27039651	READY, SET, go!	Broder J.	Diabetes Self Manag. 2016 Feb-Mar;33(1):50-4.	Broder J	Diabetes Self Manag	2016	2016-05-04
27043417	Legacy effects of short-term intentional weight loss on total body and thigh composition in overweight and obese older adults	Chmelo EA, Beavers DP, Lyles MF, Marsh AP, Nicklas BJ, Beavers KM.	Nutr Diabetes. 2016 Apr 4;6(4):e203. doi: 10.1038/nutd.2016.8.	Chmelo EA	Nutr Diabetes	2016	2016-05-04	PMC4855260		10.1038/nutd.2016.8
27027731	Caloric restriction coupled with radiation decreases metastatic burden in triple negative breast cancer	Simone BA, Dan T, Palagani A, Jin L, Han SY, Wright C, Savage JE, Gitman R, Lim MK, Palazzo J, Mehta MP, Simone NL.	Cell Cycle. 2016 Sep;15(17):2265-74. doi: 10.1080/15384101.2016.1160982. Epub 2016 Mar 30.	Simone BA	Cell Cycle	2016	31/03/2016	PMC5004690		10.1080/15384101.2016.1160982
27002059	Very Low-Calorie Diet and 6 Months of Weight Stability in Type 2 Diabetes: Pathophysiological Changes in Responders and Nonresponders	Steven S, Hollingsworth KG, Al-Mrabeh A, Avery L, Aribisala B, Caslake M, Taylor R.	Diabetes Care. 2016 May;39(5):808-15. doi: 10.2337/dc15-1942. Epub 2016 Mar 21.	Steven S	Diabetes Care	2016	23/03/2016			10.2337/dc15-1942
27003900	Increased Serum Level of Cyclopropaneoctanoic Acid 2-Hexyl in Patients with Hypertriglyceridemia-Related Disorders	Mika A, Stepnowski P, Chmielewski M, Malgorzewicz S, Kaska L, Proczko M, Ratnicki-Sklucki K, Sledzinski M, Sledzinski T.	Lipids. 2016 Jul;51(7):867-73. doi: 10.1007/s11745-016-4141-1. Epub 2016 Mar 22.	Mika A	Lipids	2016	23/03/2016	PMC4903102		10.1007/s11745-016-4141-1
27000058	An Ecological Momentary Intervention for weight loss and healthy eating via smartphone and Internet: study protocol for a randomised controlled trial	Boh B, Lemmens LH, Jansen A, Nederkoorn C, Kerkhofs V, Spanakis G, Weiss G, Roefs A.	Trials. 2016 Mar 22;17:154. doi: 10.1186/s13063-016-1280-x.	Boh B	Trials	2016	23/03/2016	PMC4802730		10.1186/s13063-016-1280-x
26995280	Evaluation of a culturally-adapted lifestyle intervention to treat elevated cardiometabolic risk of Latino adults in primary care (Vida Sana): A randomized controlled trial	Rosas LG, Lv N, Xiao L, Lewis MA, Zavella P, Kramer MK, Luna V, Ma J.	Contemp Clin Trials. 2016 May;48:30-40. doi: 10.1016/j.cct.2016.03.003. Epub 2016 Mar 16.	Rosas LG	Contemp Clin Trials	2016	21/03/2016	PMC4886337	NIHMS774732	10.1016/j.cct.2016.03.003
26992237	Safety of two-year caloric restriction in non-obese healthy individuals	Romashkan SV, Das SK, Villareal DT, Ravussin E, Redman LM, Rochon J, Bhapkar M, Kraus WE; CALERIE Study Group.	Oncotarget. 2016 Apr 12;7(15):19124-33. doi: 10.18632/oncotarget.8093.	Romashkan SV	Oncotarget	2016	19/03/2016	PMC4991370		10.18632/oncotarget.8093
26990999	Metformin-mediated increase in DICER1 regulates microRNA expression and cellular senescence	Noren Hooten N, Martin-Montalvo A, Dluzen DF, Zhang Y, Bernier M, Zonderman AB, Becker KG, Gorospe M, de Cabo R, Evans MK.	Aging Cell. 2016 Jun;15(3):572-81. doi: 10.1111/acel.12469. Epub 2016 Mar 17.	Noren Hooten N	Aging Cell	2016	19/03/2016	PMC4854919		10.1111/acel.12469
26983286	Lights, Camera ... PREDIABETES?	Tsai A.	Diabetes Forecast. 2016 Jan-Feb;69(1):40-5.	Tsai A	Diabetes Forecast	2016	18/03/2016
26978590	Weight Loss Mediated Reduction in Xanthine Oxidase Activity and Uric Acid Clearance in Adolescents with Severe Obesity	Tam HK, Kelly AS, Fox CK, Nathan BM, Johnson LA.	Child Obes. 2016 Aug;12(4):286-91. doi: 10.1089/chi.2015.0051. Epub 2016 Mar 15.	Tam HK	Child Obes	2016	16/03/2016	PMC5911696		10.1089/chi.2015.0051
26970424	Comparison of amplitude-mode ultrasound versus air displacement plethysmography for assessing body composition changes following participation in a structured weight-loss programme in women	Schoenfeld BJ, Aragon AA, Moon J, Krieger JW, Tiryaki-Sonmez G.	Clin Physiol Funct Imaging. 2017 Nov;37(6):663-668. doi: 10.1111/cpf.12355. Epub 2016 Mar 11.	Schoenfeld BJ	Clin Physiol Funct Imaging	2017	13/03/2016			10.1111/cpf.12355
26959179	Deconstructing Dietary Restriction: A Case for Systems Approaches in Aging	Yeo R, Brunet A.	Cell Metab. 2016 Mar 8;23(3):395-6. doi: 10.1016/j.cmet.2016.02.018.	Yeo R	Cell Metab	2016	2016-10-03	PMC5240043	NIHMS829066	10.1016/j.cmet.2016.02.018
26956987	The functional and clinical outcomes of exercise training following a very low energy diet for severely obese women: study protocol for a randomised controlled trial	Miller CT, Fraser SF, Selig SE, Rice T, Grima M, Straznicky NE, Levinger I, Lambert EA, van den Hoek DJ, Dixon JB.	Trials. 2016 Mar 8;17(1):125. doi: 10.1186/s13063-016-1232-5.	Miller CT	Trials	2016	2016-10-03	PMC4784287		10.1186/s13063-016-1232-5
26939878	Impact of weight loss induced by gastric bypass or caloric restriction on oxidative stress and genomic damage in obese Zucker rats	Bankoglu EE, Seyfried F, Rotzinger L, Nordbeck A, Corteville C, Jurowich C, Germer CT, Otto C, Stopper H.	Free Radic Biol Med. 2016 May;94:208-17. doi: 10.1016/j.freeradbiomed.2016.02.033. Epub 2016 Mar 3.	Bankoglu EE	Free Radic Biol Med	2016	2016-05-03			10.1016/j.freeradbiomed.2016.02.033
26940461	Calorie restriction-induced SIRT6 activation delays aging by suppressing NF-κB signaling	Zhang N, Li Z, Mu W, Li L, Liang Y, Lu M, Wang Z, Qiu Y, Wang Z.	Cell Cycle. 2016;15(7):1009-18. doi: 10.1080/15384101.2016.1152427.	Zhang N	Cell Cycle	2016	2016-05-03	PMC4889297		10.1080/15384101.2016.1152427
26938218	Network Analysis of Metabolite GWAS Hits: Implication of CPS1 and the Urea Cycle in Weight Maintenance	Matone A, Scott-Boyer MP, Carayol J, Fazelzadeh P, Lefebvre G, Valsesia A, Charon C, Vervoort J, Astrup A, Saris WH, Morine M, Hager J.	PLoS One. 2016 Mar 3;11(3):e0150495. doi: 10.1371/journal.pone.0150495. eCollection 2016.	Matone A	PLoS One	2016	2016-04-03	PMC4777532		10.1371/journal.pone.0150495
26933129	Reply to MG Browning	Müller MJ, Bosy-Westphal A.	Am J Clin Nutr. 2016 Mar;103(3):953-4. doi: 10.3945/ajcn.115.127282.	Müller MJ	Am J Clin Nutr	2016	2016-03-03			10.3945/ajcn.115.127282
26933128	Methodologic considerations in the evaluation of adaptive thermogenesis	Browning MG.	Am J Clin Nutr. 2016 Mar;103(3):952-3. doi: 10.3945/ajcn.115.127076.	Browning MG	Am J Clin Nutr	2016	2016-03-03			10.3945/ajcn.115.127076
26934328	Stress resistance and lifespan are increased in C. elegans but decreased in S. cerevisiae by mafr-1/maf1 deletion	Cai Y, Wei YH.	Oncotarget. 2016 Mar 8;7(10):10812-26. doi: 10.18632/oncotarget.7769.	Cai Y	Oncotarget	2016	2016-03-03	PMC4905441		10.18632/oncotarget.7769
26931302	A randomized trial of high-dairy-protein, variable-carbohydrate diets and exercise on body composition in adults with obesity	Parr EB, Coffey VG, Cato LE, Phillips SM, Burke LM, Hawley JA.	Obesity (Silver Spring). 2016 May;24(5):1035-45. doi: 10.1002/oby.21451. Epub 2016 Mar 2.	Parr EB	Obesity (Silver Spring)	2016	2016-03-03			10.1002/oby.21451
26925596	Improvements in insulin sensitivity after aerobic exercise and weight loss in older women with a history of gestational diabetes and type 2 diabetes mellitus	Ryan AS.	Endocr Res. 2016 May;41(2):132-41. doi: 10.3109/07435800.2015.1094087. Epub 2016 Feb 29.	Ryan AS	Endocr Res	2016	2016-02-03	PMC4961462	NIHMS801566	10.3109/07435800.2015.1094087
26923132	[Infertility: A key time to follow a medical nutritional management. Our experience on 78 patients]	Parent C, Pigeyre M, Pleuvret A, Thomas P, Deruelle P, Dewailly D, Catteau-Jonard S.	Gynecol Obstet Fertil. 2016 Apr;44(4):218-24. doi: 10.1016/j.gyobfe.2016.01.006. Epub 2016 Feb 26.	Parent C	Gynecol Obstet Fertil	2016	2016-01-03			10.1016/j.gyobfe.2016.01.006
26922762	50 Years Ago in The Journal of Pediatrics: Perinatal Stress and the Premature Neonate. II. Effect of Fluid and Calorie Deprivation on Blood Glucose	Rozance PJ.	J Pediatr. 2016 Mar;170:89. doi: 10.1016/j.jpeds.2015.10.055.	Rozance PJ	J Pediatr	2016	29/02/2016			10.1016/j.jpeds.2015.10.055
26917264	Loss of p27 Associated with Risk for Endometrial Carcinoma Arising in the Setting of Obesity	McCampbell AS, Mittelstadt ML, Dere R, Kim S, Zhou L, Djordjevic B, Soliman PT, Zhang Q, Wei C, Hursting SD, Lu KH, Broaddus RR, Walker CL.	Curr Mol Med. 2016;16(3):252-65. doi: 10.2174/1566524016666160225153307.	McCampbell AS	Curr Mol Med	2016	27/02/2016	PMC5544384	NIHMS882371	10.2174/1566524016666160225153307
26906648	Association between anorexia nervosa and type 2 diabetes in Sweden: Etiological clue for the primary prevention of type 2 diabetes	Ji J, Sundquist J, Sundquist K.	Endocr Res. 2016 Nov;41(4):310-316. doi: 10.3109/07435800.2016.1141948. Epub 2016 Feb 23.	Ji J	Endocr Res	2016	25/02/2016			10.3109/07435800.2016.1141948
26907339	Metabolic Effects of a 24-Week Energy-Restricted Intervention Combined with Low or High Dairy Intake in Overweight Women: An NMR-Based Metabolomics Investigation	Zheng H, Lorenzen JK, Astrup A, Larsen LH, Yde CC, Clausen MR, Bertram HC.	Nutrients. 2016 Feb 23;8(3):108. doi: 10.3390/nu8030108.	Zheng H	Nutrients	2016	25/02/2016	PMC4808838		10.3390/nu8030108
26902807	Regulation of the clock gene expression in human adipose tissue by weight loss	Pivovarova O, Gögebakan Ö, Sucher S, Groth J, Murahovschi V, Kessler K, Osterhoff M, Rudovich N, Kramer A, Pfeiffer AF.	Int J Obes (Lond). 2016 Jun;40(6):899-906. doi: 10.1038/ijo.2016.34. Epub 2016 Feb 23.	Pivovarova O	Int J Obes (Lond)	2016	24/02/2016			10.1038/ijo.2016.34
26896501	Converting U-500 regular insulin to insulin detemir and insulin lispro in a patient undergoing dietary changes in preparation for bariatric surgery	Nguyen KV, Weidner JA, Shaw KF, Valdez CA.	Am J Health Syst Pharm. 2016 Mar 1;73(5):292-7. doi: 10.2146/ajhp150378.	Nguyen KV	Am J Health Syst Pharm	2016	21/02/2016			10.2146/ajhp150378
26888712	Energy depletion by diet or aerobic exercise alone: impact of energy deficit modality on appetite parameters	Cameron JD, Goldfield GS, Riou MÈ, Finlayson GS, Blundell JE, Doucet É.	Am J Clin Nutr. 2016 Apr;103(4):1008-16. doi: 10.3945/ajcn.115.115584. Epub 2016 Feb 17.	Cameron JD	Am J Clin Nutr	2016	19/02/2016			10.3945/ajcn.115.115584
26888112	Influence of ADRB2 Gln27Glu and ADRB3 Trp64Arg polymorphisms on body weight and body composition changes after a controlled weight-loss intervention	Szendrei B, González-Lamuño D, Amigo T, Wang G, Pitsiladis Y, Benito PJ, Gomez-Candela C, Calderón FJ, Cupeiro R; PRONAF Study Group.	Appl Physiol Nutr Metab. 2016 Mar;41(3):307-14. doi: 10.1139/apnm-2015-0425. Epub 2015 Nov 25.	Szendrei B	Appl Physiol Nutr Metab	2016	19/02/2016			10.1139/apnm-2015-0425
26883276	Growth factors, aging and age-related diseases	Balasubramanian P, Longo VD.	Growth Horm IGF Res. 2016 Jun;28:66-8. doi: 10.1016/j.ghir.2016.01.001. Epub 2016 Jan 7.	Balasubramanian P	Growth Horm IGF Res	2016	18/02/2016	PMC5455771	NIHMS760300	10.1016/j.ghir.2016.01.001
26879629	Influence of calorie reduction on DNA repair capacity of human peripheral blood mononuclear cells	Matt K, Burger K, Gebhard D, Bergemann J.	Mech Ageing Dev. 2016 Mar;154:24-9. doi: 10.1016/j.mad.2016.02.008. Epub 2016 Feb 13.	Matt K	Mech Ageing Dev	2016	17/02/2016			10.1016/j.mad.2016.02.008
26881317	Effects of aerobic training, resistance training, or both on cardiorespiratory and musculoskeletal fitness in adolescents with obesity: the HEARTY trial	Alberga AS, Prud'homme D, Sigal RJ, Goldfield GS, Hadjiyannakis S, Phillips P, Malcolm J, Ma J, Doucette S, Gougeon R, Wells GA, Kenny GP.	Appl Physiol Nutr Metab. 2016 Mar;41(3):255-65. doi: 10.1139/apnm-2015-0413. Epub 2015 Nov 9.	Alberga AS	Appl Physiol Nutr Metab	2016	17/02/2016			10.1139/apnm-2015-0413
26877215	Obesity, food restriction, and implicit attitudes to healthy and unhealthy foods: Lessons learned from the implicit relational assessment procedure	McKenna I, Hughes S, Barnes-Holmes D, De Schryver M, Yoder R, O'Shea D.	Appetite. 2016 May 1;100:41-54. doi: 10.1016/j.appet.2016.02.013. Epub 2016 Feb 11.	McKenna I	Appetite	2016	16/02/2016			10.1016/j.appet.2016.02.013
26875447	Energy-restricted, high-protein diets more effectively impact cardiometabolic profile in overweight and obese women than lower-protein diets	Mateo-Gallego R, Marco-Benedí V, Perez-Calahorra S, Bea AM, Baila-Rueda L, Lamiquiz-Moneo I, de Castro-Orós I, Cenarro A, Civeira F.	Clin Nutr. 2017 Apr;36(2):371-379. doi: 10.1016/j.clnu.2016.01.018. Epub 2016 Jan 29.	Mateo-Gallego R	Clin Nutr	2017	16/02/2016			10.1016/j.clnu.2016.01.018
26853430	Can response to dietary restriction predict weight loss after Roux-en-Y gastroplasty?	Azar M, Nikpay M, Harper ME, McPherson R, Dent R.	Obesity (Silver Spring). 2016 Apr;24(4):805-11. doi: 10.1002/oby.21395. Epub 2016 Feb 8.	Azar M	Obesity (Silver Spring)	2016	2016-09-02			10.1002/oby.21395
26852530	[Low calorie diet influence optimization on body composition at obese patients with secondary diastolic heart failure]	Bogdanov AR, Derbeneva SA, Bogdanova AA, Feofanova TB, Panfilova NV, Nesierova VE.	Vopr Pitan. 2015;84(4):37-46.	Bogdanov AR	Vopr Pitan	2015	2016-09-02
26852497	[Early diagnostics, prophylaxis, and non-pharmacological treatment of the preclinical stages of atherosclerosis and arterial hypertension]	Bykov AT, Chernyshev AV, Vartazaryan MA, Lobastov RV.	Vopr Kurortol Fizioter Lech Fiz Kult. 2015 Sep-Oct;92(5):18-21. doi: 10.17116/kurort2015518-21.	Bykov AT	Vopr Kurortol Fizioter Lech Fiz Kult	2015	2016-09-02			10.17116/kurort2015518-21
26852885	Effects of 12 weeks of combined training without caloric restriction on inflammatory markers in overweight girls	Lopes WA, Leite N, da Silva LR, Brunelli DT, Gáspari AF, Radominski RB, Chacon-Mikahil MP, Cavaglieri CR.	J Sports Sci. 2016 Oct;34(20):1902-12. doi: 10.1080/02640414.2016.1142107. Epub 2016 Feb 6.	Lopes WA	J Sports Sci	2016	2016-09-02			10.1080/02640414.2016.1142107
26850040	Feasibility outcomes of a presurgical randomized controlled trial exploring the impact of caloric restriction and increased physical activity versus a wait-list control on tumor characteristics and circulating biomarkers in men electing prostatectomy for prostate cancer	Demark-Wahnefried W, Nix JW, Hunter GR, Rais-Bahrami S, Desmond RA, Chacko B, Morrow CD, Azrad M, Frugé AD, Tsuruta Y, Ptacek T, Tully SA, Segal R, Grizzle WE.	BMC Cancer. 2016 Feb 5;16:61. doi: 10.1186/s12885-016-2075-x.	Demark-Wahnefried W	BMC Cancer	2016	2016-07-02	PMC4743419		10.1186/s12885-016-2075-x
26847390	Reprogramming of defended body weight after Roux-En-Y gastric bypass surgery in diet-induced obese mice	Hao Z, Mumphrey MB, Townsend RL, Morrison CD, Münzberg H, Ye J, Berthoud HR.	Obesity (Silver Spring). 2016 Mar;24(3):654-60. doi: 10.1002/oby.21400. Epub 2016 Feb 5.	Hao Z	Obesity (Silver Spring)	2016	2016-06-02	PMC4769678	NIHMS738509	10.1002/oby.21400
26841953	Review of 3-year outcomes of a very-low-energy diet-based outpatient obesity treatment programme	Sumithran P, Prendergast LA, Haywood CJ, Houlihan CA, Proietto J.	Clin Obes. 2016 Apr;6(2):101-7. doi: 10.1111/cob.12135. Epub 2016 Feb 3.	Sumithran P	Clin Obes	2016	2016-05-02			10.1111/cob.12135
26838769	Caloric Restriction in Older Adults-Differential Effects of Weight Loss and Reduced Weight on Brain Structure and Function	Prehn K, Jumpertz von Schwartzenberg R, Mai K, Zeitz U, Witte AV, Hampel D, Szela AM, Fabian S, Grittner U, Spranger J, Flöel A.	Cereb Cortex. 2017 Mar 1;27(3):1765-1778. doi: 10.1093/cercor/bhw008.	Prehn K	Cereb Cortex	2017	2016-04-02			10.1093/cercor/bhw008
26824634	Metabolic effects of a 13-weeks lifestyle intervention in older adults: The Growing Old Together Study	van de Rest O, Schutte BA, Deelen J, Stassen SA, van den Akker EB, van Heemst D, Dibbets-Schneider P, van Dipten-van der Veen RA, Kelderman M, Hankemeier T, Mooijaart SP, van der Grond J, Houwing-Duistermaat JJ, Beekman M, Feskens EJ, Slagboom PE.	Aging (Albany NY). 2016 Jan;8(1):111-26. doi: 10.18632/aging.100877.	van de Rest O	Aging (Albany NY)	2016	30/01/2016	PMC4761717		10.18632/aging.100877
26820817	Hazardous drinking and weight-conscious drinking behaviors in a sample of college students and college student athletes	Martin RJ, Chaney BH, Vail-Smith K, Gallucci AR.	Subst Abus. 2016 Jul-Sep;37(3):488-493. doi: 10.1080/08897077.2016.1142922. Epub 2016 Jan 28.	Martin RJ	Subst Abus	2016	29/01/2016			10.1080/08897077.2016.1142922
26817506	Higher compared with lower dietary protein during an energy deficit combined with intense exercise promotes greater lean mass gain and fat mass loss: a randomized trial	Longland TM, Oikawa SY, Mitchell CJ, Devries MC, Phillips SM.	Am J Clin Nutr. 2016 Mar;103(3):738-46. doi: 10.3945/ajcn.115.119339. Epub 2016 Jan 27.	Longland TM	Am J Clin Nutr	2016	29/01/2016			10.3945/ajcn.115.119339
26819200	Investigation into the acute effects of total and partial energy restriction on postprandial metabolism among overweight/obese participants	Antoni R, Johnston KL, Collins AL, Robertson MD.	Br J Nutr. 2016 Mar 28;115(6):951-9. doi: 10.1017/S0007114515005346. Epub 2016 Jan 28.	Antoni R	Br J Nutr	2016	29/01/2016			10.1017/S0007114515005346
26821042	Effects of Dietary Protein Source and Quantity during Weight Loss on Appetite, Energy Expenditure, and Cardio-Metabolic Responses	Li J, Armstrong CL, Campbell WW.	Nutrients. 2016 Jan 26;8(2):63. doi: 10.3390/nu8020063.	Li J	Nutrients	2016	29/01/2016	PMC4772027		10.3390/nu8020063
26813523	Physical activity and weight loss are independent predictors of improved insulin sensitivity following energy restriction	Camps SG, Verhoef SP, Westerterp KR.	Obesity (Silver Spring). 2016 Feb;24(2):291-6. doi: 10.1002/oby.21325. Epub 2016 Jan 6.	Camps SG	Obesity (Silver Spring)	2016	28/01/2016			10.1002/oby.21325
26813524	The effect of rate of weight loss on long-term weight regain in adults with overweight and obesity	Vink RG, Roumans NJ, Arkenbosch LA, Mariman EC, van Baak MA.	Obesity (Silver Spring). 2016 Feb;24(2):321-7. doi: 10.1002/oby.21346.	Vink RG	Obesity (Silver Spring)	2016	28/01/2016			10.1002/oby.21346
26813527	Weight loss predictability by plasma metabolic signatures in adults with obesity and morbid obesity of the DiOGenes study	Stroeve JH, Saccenti E, Bouwman J, Dane A, Strassburg K, Vervoort J, Hankemeier T, Astrup A, Smilde AK, van Ommen B, Saris WH.	Obesity (Silver Spring). 2016 Feb;24(2):379-88. doi: 10.1002/oby.21361.	Stroeve JH	Obesity (Silver Spring)	2016	28/01/2016			10.1002/oby.21361
26811166	Effects of Diet Composition and Insulin Resistance Status on Plasma Lipid Levels in a Weight Loss Intervention in Women	Le T, Flatt SW, Natarajan L, Pakiz B, Quintana EL, Heath DD, Rana BK, Rock CL.	J Am Heart Assoc. 2016 Jan 25;5(1):e002771. doi: 10.1161/JAHA.115.002771.	Le T	J Am Heart Assoc	2016	27/01/2016	PMC4859396		10.1161/JAHA.115.002771
26812158	Metabolic Benefit of Chronic Caloric Restriction and Activation of Hypothalamic AGRP/NPY Neurons in Male Mice Is Independent of Ghrelin	Rogers NH, Walsh H, Alvarez-Garcia O, Park S, Gaylinn B, Thorner MO, Smith RG.	Endocrinology. 2016 Apr;157(4):1430-42. doi: 10.1210/en.2015-1745. Epub 2016 Jan 26.	Rogers NH	Endocrinology	2016	27/01/2016	PMC4816730		10.1210/en.2015-1745
26803431	Weight loss is superior to exercise in improving the atherogenic lipid profile in a sedentary, overweight population with stable coronary artery disease: A randomized trial	Pedersen LR, Olsen RH, Anholm C, Walzem RL, Fenger M, Eugen-Olsen J, Haugaard SB, Prescott E.	Atherosclerosis. 2016 Mar;246:221-8. doi: 10.1016/j.atherosclerosis.2016.01.001. Epub 2016 Jan 13.	Pedersen LR	Atherosclerosis	2016	25/01/2016			10.1016/j.atherosclerosis.2016.01.001
26785474	Death-defying experiments	Cohen J.	Science. 2015 Dec 4;350(6265):1186-7. doi: 10.1126/science.350.6265.1186.	Cohen J	Science	2015	20/01/2016			10.1126/science.350.6265.1186
26784190	Metformin Restores Parkin-Mediated Mitophagy, Suppressed by Cytosolic p53	Song YM, Lee WK, Lee YH, Kang ES, Cha BS, Lee BW.	Int J Mol Sci. 2016 Jan 16;17(1):122. doi: 10.3390/ijms17010122.	Song YM	Int J Mol Sci	2016	20/01/2016	PMC4730363		10.3390/ijms17010122
26774472	Long-Term Calorie Restriction Enhances Cellular Quality-Control Processes in Human Skeletal Muscle	Yang L, Licastro D, Cava E, Veronese N, Spelta F, Rizza W, Bertozzi B, Villareal DT, Hotamisligil GS, Holloszy JO, Fontana L.	Cell Rep. 2016 Jan 26;14(3):422-428. doi: 10.1016/j.celrep.2015.12.042. Epub 2016 Jan 7.	Yang L	Cell Rep	2016	18/01/2016			10.1016/j.celrep.2015.12.042
26752600	The association of eating styles with weight change after an intensive combined lifestyle intervention for children and adolescents with severe obesity	Halberstadt J, van Strien T, de Vet E, Eekhout I, Braet C, Seidell JC.	Appetite. 2016 Apr 1;99:82-90. doi: 10.1016/j.appet.2015.12.032. Epub 2016 Jan 2.	Halberstadt J	Appetite	2016	2016-12-01			10.1016/j.appet.2015.12.032
26751601	Influence of weight reduction on blood levels of C-reactive protein, tumor necrosis factor-α, interleukin-6, and oxylipins in obese subjects	Möller K, Ostermann AI, Rund K, Thoms S, Blume C, Stahl F, Hahn A, Schebb NH, Schuchardt JP.	Prostaglandins Leukot Essent Fatty Acids. 2016 Mar;106:39-49. doi: 10.1016/j.plefa.2015.12.001. Epub 2015 Dec 17.	Möller K	Prostaglandins Leukot Essent Fatty Acids	2016	2016-12-01			10.1016/j.plefa.2015.12.001
26751808	HDL-sphingomyelin reduction after weight loss by an energy-restricted diet is associated with the improvement of lipid profile, blood pressure, and decrease of insulin resistance in overweight/obese patients	Martínez-Ramírez M, Madero M, Vargas-Alarcón G, Vargas-Barrón J, Fragoso JM, Rodríguez-Pérez JM, Martínez-Sánchez C, González-Pacheco H, Bautista-Pérez R, Carreón-Torres E, Pérez-Méndez O.	Clin Chim Acta. 2016 Feb 15;454:77-81. doi: 10.1016/j.cca.2015.12.039. Epub 2016 Jan 2.	Martínez-Ramírez M	Clin Chim Acta	2016	2016-12-01			10.1016/j.cca.2015.12.039
26746454	Lifestyle Interventions to Improve Exercise Tolerance in Obese Older Patients With Heart Failure and Preserved Ejection Fraction	Wenger NK.	JAMA. 2016 Jan 5;315(1):31-3. doi: 10.1001/jama.2015.17347.	Wenger NK	JAMA	2016	2016-10-01			10.1001/jama.2015.17347
26746456	Effect of Caloric Restriction or Aerobic Exercise Training on Peak Oxygen Consumption and Quality of Life in Obese Older Patients With Heart Failure With Preserved Ejection Fraction: A Randomized Clinical Trial	Kitzman DW, Brubaker P, Morgan T, Haykowsky M, Hundley G, Kraus WE, Eggebeen J, Nicklas BJ.	JAMA. 2016 Jan 5;315(1):36-46. doi: 10.1001/jama.2015.17346.	Kitzman DW	JAMA	2016	2016-10-01	PMC4787295	NIHMS760924	10.1001/jama.2015.17346
26740683	Altered Appetite-Mediating Hormone Concentrations Precede Compensatory Overeating After Severe, Short-Term Energy Deprivation in Healthy Adults	O'Connor KL, Scisco JL, Smith TJ, Young AJ, Montain SJ, Price LL, Lieberman HR, Karl JP.	J Nutr. 2016 Feb;146(2):209-17. doi: 10.3945/jn.115.217976. Epub 2016 Jan 6.	O'Connor KL	J Nutr	2016	2016-08-01			10.3945/jn.115.217976
26733764	In a single-blind, matched group design: branched-chain amino acid supplementation and resistance training maintains lean body mass during a caloric restricted diet	Dudgeon WD, Kelley EP, Scheett TP.	J Int Soc Sports Nutr. 2016 Jan 5;13:1. doi: 10.1186/s12970-015-0112-9. eCollection 2016.	Dudgeon WD	J Int Soc Sports Nutr	2016	2016-07-01	PMC4700774		10.1186/s12970-015-0112-9
26729277	Differential Acute Impacts of Sleeve Gastrectomy, Roux-en-Y Gastric Bypass Surgery and Matched Caloric Restriction Diet on Insulin Secretion, Insulin Effectiveness and Non-Esterified Fatty Acid Levels Among Patients with Type 2 Diabetes	Thomas F, Smith GC, Lu J, Babor R, Booth M, Beban G, Chase JG, Murphy R.	Obes Surg. 2016 Aug;26(8):1924-31. doi: 10.1007/s11695-015-2038-3.	Thomas F	Obes Surg	2016	2016-06-01			10.1007/s11695-015-2038-3
26727117	A randomized trial testing the efficacy of a novel approach to weight loss among men with overweight and obesity	Crane MM, Lutes LD, Ward DS, Bowling JM, Tate DF.	Obesity (Silver Spring). 2015 Dec;23(12):2398-405. doi: 10.1002/oby.21265.	Crane MM	Obesity (Silver Spring)	2015	2016-05-01	PMC4700541	NIHMS713377	10.1002/oby.21265
26712187	Effects of dairy products consumption on weight loss and blood chemistry in premenopausal obese women	Celik N, Inanc N.	J Pak Med Assoc. 2016 Jan;66(1):76-82.	Celik N	J Pak Med Assoc	2016	30/12/2015
26696635	Cutting Calories and TXNIP From the Skeletal Muscle to Restore Insulin Sensitivity	Anderson EJ.	Diabetes. 2016 Jan;65(1):16-8. doi: 10.2337/dbi15-0021.	Anderson EJ	Diabetes	2016	24/12/2015	PMC4876766		10.2337/dbi15-0021
26690565	Polymorphism in the CLOCK gene may influence the effect of fat intake reduction on weight loss	Loria-Kohen V, Espinosa-Salinas I, Marcos-Pasero H, Lourenço-Nogueira T, Herranz J, Molina S, Reglero G, Ramirez de Molina A.	Nutrition. 2016 Apr;32(4):453-60. doi: 10.1016/j.nut.2015.10.013. Epub 2015 Nov 6.	Loria-Kohen V	Nutrition	2016	23/12/2015			10.1016/j.nut.2015.10.013
26680695	Birth weight predicted baseline muscular efficiency, but not response of energy expenditure to calorie restriction: An empirical test of the predictive adaptive response hypothesis	Workman M, Baker J, Lancaster JB, Mermier C, Alcock J.	Am J Hum Biol. 2016 Jul;28(4):484-92. doi: 10.1002/ajhb.22818. Epub 2015 Dec 17.	Workman M	Am J Hum Biol	2016	19/12/2015			10.1002/ajhb.22818
26656551	[CHANGES IN LIFESTYLE FACTORS AFFECT THE LEVELS OF NEUROPEPTIDES, INVOLVED IN THE CONTROL OF EATING BEHAVIOR, INSULIN RESISTANCE AND LEVEL OF CHRONIC SYSTEMIC INFLAMMATION IN YOUNG OVERWEIGHT PERSONS]	Shevchenko Y, Mamontova T, Baranova A, Vesnina L, Kaidashev I.	Georgian Med News. 2015 Nov;(248):50-7.	Shevchenko Y	Georgian Med News	2015	15/12/2015
26646495	Translational strategies in aging and age-related disease	Armanios M, de Cabo R, Mannick J, Partridge L, van Deursen J, Villeda S.	Nat Med. 2015 Dec;21(12):1395-9. doi: 10.1038/nm.4004.	Armanios M	Nat Med	2015	2015-10-12			10.1038/nm.4004
26631253	A daily diary study of perceived social isolation, dietary restraint, and negative affect in binge eating	Mason TB, Heron KE, Braitman AL, Lewis RJ.	Appetite. 2016 Feb 1;97:94-100. doi: 10.1016/j.appet.2015.11.027. Epub 2015 Nov 26.	Mason TB	Appetite	2016	2015-04-12			10.1016/j.appet.2015.11.027
26633473	Internal Fat and Cardiometabolic Risk Factors Following a Meal-Replacement Regimen vs. Comprehensive Lifestyle Changes in Obese Subjects	König D, Zdzieblik D, Deibert P, Berg A, Gollhofer A, Büchert M.	Nutrients. 2015 Dec 1;7(12):9825-33. doi: 10.3390/nu7125500.	König D	Nutrients	2015	2015-04-12	PMC4690052		10.3390/nu7125500
26615912	Vitamin D deficiency in non-alcoholic fatty liver disease: The chicken or the egg?	Lee SM, Jun DW, Cho YK, Jang KS.	Clin Nutr. 2017 Feb;36(1):191-197. doi: 10.1016/j.clnu.2015.10.017. Epub 2015 Nov 11.	Lee SM	Clin Nutr	2017	2015-01-12			10.1016/j.clnu.2015.10.017
26608649	Weight loss therapy for clinical management of patients with some atherosclerotic diseases: a randomized clinical trial	Oshakbayev K, Dukenbayeva B, Otarbayev N, Togizbayeva G, Tabynbayev N, Gazaliyeva M, Idrisov A, Oshakbayev P.	Nutr J. 2015 Nov 25;14:120. doi: 10.1186/s12937-015-0108-y.	Oshakbayev K	Nutr J	2015	27/11/2015	PMC4660604		10.1186/s12937-015-0108-y
26591103	[CHANGES IN BODY MASS AND BLOOD LIPID LEVELS IN PATIENTS UNDERGOING CALORIC RESTRICTION]	Gawęcka A, Ryterska K, Wysokiński P, Ficek K, Wilk K, Banaszczak M, Jakubczak K, Piotrowki J, Czerwińska M, Hołowko J, Maciejewska D, Jamiol-Milc D, Stachowska E.	Ann Acad Med Stetin. 2014;60(2):29-33.	Gawęcka A	Ann Acad Med Stetin	2014	24/11/2015
26575100	Effect of 1-h moderate-intensity aerobic exercise on intramyocellular lipids in obese men before and after a lifestyle intervention	Ipavec-Levasseur S, Croci I, Choquette S, Byrne NM, Cowin G, O'Moore-Sullivan TM, Prins JB, Hickman IJ.	Appl Physiol Nutr Metab. 2015 Dec;40(12):1262-8. doi: 10.1139/apnm-2015-0258. Epub 2015 Aug 17.	Ipavec-Levasseur S	Appl Physiol Nutr Metab	2015	18/11/2015			10.1139/apnm-2015-0258
26571283	Intermittent fasting interventions for the treatment of overweight and obesity in adults aged 18 years and over: a systematic review protocol	Jane L, Atkinson G, Jaime V, Hamilton S, Waller G, Harrison S.	JBI Database System Rev Implement Rep. 2015 Oct;13(10):60-8. doi: 10.11124/jbisrir-2015-2363.	Jane L	JBI Database System Rev Implement Rep	2015	17/11/2015			10.11124/jbisrir-2015-2363
26559897	Very low-calorie ketogenic diet may allow restoring response to systemic therapy in relapsing plaque psoriasis	Castaldo G, Galdo G, Rotondi Aufiero F, Cereda E.	Obes Res Clin Pract. 2016 May-Jun;10(3):348-52. doi: 10.1016/j.orcp.2015.10.008. Epub 2015 Nov 11.	Castaldo G	Obes Res Clin Pract	2016	13/11/2015			10.1016/j.orcp.2015.10.008
26545655	EFFECT OF HYPOENERGETIC DIET COMBINED WITH CONSUMPTION OF COCONUT FLOUR IN OVERWEIGHT WOMEN	de Paula Franco E, Moraes de Oliveira GM, Raggio Luiz R, Rosa G.	Nutr Hosp. 2015 Nov 1;32(5):2012-8. doi: 10.3305/nh.2015.32.5.9661.	de Paula Franco E	Nutr Hosp	2015	2015-08-11			10.3305/nh.2015.32.5.9661
26525617	[The efficacy of low calorie diet therapy in patients with arterial hypertension and chronic cerebral ischemia]	Zotova AV, Desyatova IE, Bychenko SM, Sivertseva SA, Okonechnikova NS, Murav'ev SA.	Zh Nevrol Psikhiatr Im S S Korsakova. 2015;115(10):25-28. doi: 10.17116/jnevro201511510125-28.	Zotova AV	Zh Nevrol Psikhiatr Im S S Korsakova	2015	2015-04-11			10.17116/jnevro201511510125-28
26520805	Leptin as a potential mediator of both physiologic and behavioral determinants of reductions in activity-related energy expenditure during weight loss	Browning MG.	Metabolism. 2016 Jan;65(1):e1. doi: 10.1016/j.metabol.2015.10.006. Epub 2015 Oct 9.	Browning MG	Metabolism	2016	2015-02-11			10.1016/j.metabol.2015.10.006
[truncated: 1,710 more rows]

## Sheet: Data added
Number	Title	DOI/ URL	Authors	Details	PMID/ PMCID	Properties	Year	Males (sex)	# Males	Female (sex)	# Females	Data combined?	Participant location	Group	M appropriate	F appropriate	M:F ratio	Notes
[truncated: 2,569 more rows]

[truncated: 2 more sheets: Sorting for obligates & pie cha, Not & partial combined for sex ]
