# Supplementary material for: The effects of caloric restriction on adipose tissue and metabolic health are sex- and age-dependent
Source: eLife journal article supplement (doi:10.7554/elife.88080), 2023-04-18
Supplement: supp [file Literature_Search_Mice.xlsx]

## Sheet: All
																				Reports parameters:
Number assigned	Title	URL	Properties	Year	Backgroun strain	Males	# Males	Females	# Females	Data combined	Uses 2 sexes (data combined)	Uses 2 sexes (data uncombined)	Sexes used data not fully available	Final reduction in calories	Stepwise?	Age beginning diet	Duration	Key findings	Notes	Metabolic	Cardiovascular	Neurological	Ongogenic	Renal	Reports sex differences?	# Males	# Females	#sex not mentioned
1	Effect of feed restriction on the environmental variability of birth weight in divergently selected lines of mice.	/pubmed/31195962	create date:2019/06/15 | first author:Formoso-Rafferty N	2019	Could not see clear evidence of CR in mice in vivo	Could not see clear evidence of CR in mice in vivo	Could not see clear evidence of CR in mice in vivo	Could not see clear evidence of CR in mice in vivo	Could not see clear evidence of CR in mice in vivo		Could not see clear evidence of CR in mice in vivo	Could not see clear evidence of CR in mice in vivo	Could not see clear evidence of CR in mice in vivo	Could not see clear evidence of CR in mice in vivo	Could not see clear evidence of CR in mice in vivo	Could not see clear evidence of CR in mice in vivo	Could not see clear evidence of CR in mice in vivo	Could not see clear evidence of CR in mice in vivo	Could not see clear evidence of CR in mice in vivo	Could not see clear evidence of CR in mice in vivo	Could not see clear evidence of CR in mice in vivo	Could not see clear evidence of CR in mice in vivo	Could not see clear evidence of CR in mice in vivo	Could not see clear evidence of CR in mice in vivo	Could not see clear evidence of CR in mice in vivo	Could not see clear evidence of CR in mice in vivo	Could not see clear evidence of CR in mice in vivo	Could not see clear evidence of CR in mice in vivo
2	Hepatic arginase 2 (Arg2) is sufficient to convey the therapeutic metabolic effects of fasting.	/pubmed/30962478	create date:2019/04/10 | first author:Zhang Y	2019	Could not see clear evidence of CR in mice in vivo	Could not see clear evidence of CR in mice in vivo	Could not see clear evidence of CR in mice in vivo	Could not see clear evidence of CR in mice in vivo	Could not see clear evidence of CR in mice in vivo		Could not see clear evidence of CR in mice in vivo	Could not see clear evidence of CR in mice in vivo	Could not see clear evidence of CR in mice in vivo	Could not see clear evidence of CR in mice in vivo	Could not see clear evidence of CR in mice in vivo	Could not see clear evidence of CR in mice in vivo	Could not see clear evidence of CR in mice in vivo	Could not see clear evidence of CR in mice in vivo	Could not see clear evidence of CR in mice in vivo	Could not see clear evidence of CR in mice in vivo	Could not see clear evidence of CR in mice in vivo	Could not see clear evidence of CR in mice in vivo	Could not see clear evidence of CR in mice in vivo	Could not see clear evidence of CR in mice in vivo	Could not see clear evidence of CR in mice in vivo	Could not see clear evidence of CR in mice in vivo	Could not see clear evidence of CR in mice in vivo	Could not see clear evidence of CR in mice in vivo
3	Growth hormone acts on liver to stimulate autophagy, support glucose production, and preserve blood glucose in chronically starved mice.	/pubmed/30910968	create date:2019/03/27 | first author:Fang F	2019	C57BL/6N (Flx/Flx)	Y		N		One sex	N	N	N	0.6	N	7-9 wks	11 days	Come back to
4	A Comparison of Dietary and Caloric Restriction Models on Body Composition, Physical Performance, and Metabolic Health in Young Mice.	/pubmed/30736418	create date:2019/02/10 | first author:Smith NJ	2019	C57BL/6	Y	60	N	0	One sex	N	N	N	0.2	N	12 weeks	7 Wks	Come back to	High fat fed first							60	0
5	Dietary Energy Restriction Ameliorates Cognitive Impairment in a Mouse Model of Traumatic Brain Injury.	/pubmed/30734244	create date:2019/02/09 | first author:Rubovitch V	2019	ICR	Y	42	N	0	One sex	N	N	N	0.4	Y	7-8 wks	4 Wks	CR (& IF) prevented hippocampal SIRT1 decrease following model of brain trauma								42	0
6	Infrequent Feeding of Restricted Amounts of Food Induces Stress and Adipose Tissue Inflammation, Contributing to Impaired Glucose Metabolism.	/pubmed/30588190	create date:2018/12/28 | first author:Lee YS	2018	C57BL/6	N	15	N	0	One sex	N	N	Y													15	0
7	Effects of caloric restriction on neuropathic pain, peripheral nerve degeneration and inflammation in normometabolic and autophagy defective prediabetic Ambra1 mice.	/pubmed/30532260	create date:2018/12/12 | first author:Coccurello R	2018	CD1	Y	44	N		One sex	N	N	N			12 wks	1 Wk									44		44		Number done	Number left	% Completion
8	Interleukin-12 as a biomarker of the beneficial effects of food restriction in mice receiving high fat diet or high carbohydrate diet.	/pubmed/30462775	create date:2018/11/22 | first author:de Almeida-Souza CB	2018	Swiss	Y	10	N	0	One sex	N	N	N	0.5	N	NA	8 Wks									10	0			977	451	68.4174
9	Hepatic gene body hypermethylation is a shared epigenetic signature of murine longevity.	/pubmed/30462643	create date:2018/11/22 | first author:Hahn O	2018	C3B6F1	N		Y	18	One sex	N	N	N	0.4	Y	12 weeks	2 & 24 Mo										18
10	Identity Noise and Adipogenic Traits Characterize Dermal Fibroblast Aging.	/pubmed/30415840	create date:2018/11/13 | first author:Salzer MC	2018	C57BL/6J	N		Y		One sex	N	N	N	0.3	N	11 mo	7 mo		Retired breeders
11	Metabolic regulation of female puberty via hypothalamic AMPK-kisspeptin signaling.	/pubmed/30348767	create date:2018/10/24 | first author:Roa J	2018	Could not see clear evidence of CR in mice in vivo	Could not see clear evidence of CR in mice in vivo	Could not see clear evidence of CR in mice in vivo	Could not see clear evidence of CR in mice in vivo	Could not see clear evidence of CR in mice in vivo	XXXXXXX	Could not see clear evidence of CR in mice in vivo	Could not see clear evidence of CR in mice in vivo	Could not see clear evidence of CR in mice in vivo	Could not see clear evidence of CR in mice in vivo	Could not see clear evidence of CR in mice in vivo	Could not see clear evidence of CR in mice in vivo	Could not see clear evidence of CR in mice in vivo	Could not see clear evidence of CR in mice in vivo	Could not see clear evidence of CR in mice in vivo	Could not see clear evidence of CR in mice in vivo	Could not see clear evidence of CR in mice in vivo	Could not see clear evidence of CR in mice in vivo	Could not see clear evidence of CR in mice in vivo	Could not see clear evidence of CR in mice in vivo	Could not see clear evidence of CR in mice in vivo	Could not see clear evidence of CR in mice in vivo	Could not see clear evidence of CR in mice in vivo	Could not see clear evidence of CR in mice in vivo
12	SIRT1 knock-in mice preserve ovarian reserve resembling caloric restriction.	/pubmed/30340050	create date:2018/10/20 | first author:Long GY	2018	Could not see clear evidence of CR in mice in vivo	Could not see clear evidence of CR in mice in vivo	Could not see clear evidence of CR in mice in vivo	Could not see clear evidence of CR in mice in vivo	Could not see clear evidence of CR in mice in vivo	XXXXXXX	Could not see clear evidence of CR in mice in vivo	Could not see clear evidence of CR in mice in vivo	Could not see clear evidence of CR in mice in vivo	Could not see clear evidence of CR in mice in vivo	Could not see clear evidence of CR in mice in vivo	Could not see clear evidence of CR in mice in vivo	Could not see clear evidence of CR in mice in vivo	Could not see clear evidence of CR in mice in vivo	Could not see clear evidence of CR in mice in vivo	Could not see clear evidence of CR in mice in vivo	Could not see clear evidence of CR in mice in vivo	Could not see clear evidence of CR in mice in vivo	Could not see clear evidence of CR in mice in vivo	Could not see clear evidence of CR in mice in vivo	Could not see clear evidence of CR in mice in vivo	Could not see clear evidence of CR in mice in vivo	Could not see clear evidence of CR in mice in vivo	Could not see clear evidence of CR in mice in vivo
13	Effects of Obesity and Gastric Bypass Surgery on Nutrient Sensors, Endocrine Cells, and Mucosal Innervation of the Mouse Colon.	/pubmed/30336615	create date:2018/10/20 | first author:Peiris M	2018	C57BL/6J	Y		N		One sex	N	N	N	Weight matched		NA	12 Wks																Could not see clear evidence of CR in mice in vivo
14	Metabolic memory of dietary restriction ameliorates DNA damage and adipocyte size in mouse visceral adipose tissue.	/pubmed/30312736	create date:2018/10/13 | first author:Ishaq A	2018	C57BL/6	Y		N		One sex	N	N	N
15	10,12 Conjugated Linoleic Acid-Driven Weight Loss Is Protective against Atherosclerosis in Mice and Is Associated with Alternative Macrophage Enrichment in Perivascular Adipose Tissue.	/pubmed/30282904	create date:2018/10/05 | first author:Kanter JE	2018	C57BL/6	Y		N	0	One sex	N	N	N						Ldlr_/_								0
16	Calorie restriction prevents diet-induced insulin resistance independently of PGC-1-driven mitochondrial biogenesis in white adipose tissue.	/pubmed/30277821	create date:2018/10/03 | first author:Pardo R	2018	C57BL/6J	Y		N	0	One sex	N	N	N														0
17	Activation of brown adipose tissue enhances the efficacy of caloric restriction for treatment of nonalcoholic steatohepatitis.	/pubmed/30258096	create date:2018/09/28 | first author:Poekes L	2018	NOD B10	N		N		One sex	N	N	Y						(foz/foz) Aussie mouse
21	Caloric restriction inhibits mammary tumorigenesis in MMTV-ErbB2 transgenic mice through the suppression of ER and ErbB2 pathways and inhibition of epithelial cell stemness in premalignant mammary tissues.	/pubmed/30107476	create date:2018/08/15 | first author:Ma Z	2018	MMTV-ErbB2	N	0	Y	40	One sex	N	N	N													0	40
22	Regulation of diabetic cardiomyopathy by caloric restriction is mediated by intracellular signaling pathways involving 'SIRT1 and PGC-1_'.	/pubmed/30071860	create date:2018/08/04 | first author:Waldman M	2018	C57BLKS/J-leprdb/leprdb	Y		N		One sex	N	N	N															63
23	Changes in blood glucose as a function of body temperature in laboratory mice: implications for daily torpor.	/pubmed/30040481	create date:2018/07/25 | first author:Lo Martire V	2018	C57BL/6J	Y	6	N	0	One sex	N	N	N						Reason: thought it would be more likely to succeed to use males due to larger body mass							6	0
24	At similar weight loss, dietary composition determines the degree of glycemic improvement in diet-induced obese C57BL/6 mice.	/pubmed/30036374	create date:2018/07/24 | first author:Vangoitsenhoven R	2018	C57BL/6	Y	26	N	0	One sex	N	N	N													26	0
25	Sodium-glucose cotransporter 2 inhibition normalizes glucose metabolism and suppresses oxidative stress in the kidneys of diabetic mice.	/pubmed/30021702	create date:2018/07/20 | first author:Tanaka S	2018	BTBR ob/ob	Y		N	0	One sex	N	N	N														0
26	Food anticipatory activity on a calorie-restricted diet is independent of Sirt1.	/pubmed/29940007	create date:2018/06/26 | first author:Assali DR	2018	C57BL/6J	N		N		XXXXXXX	Y	N	N						Sirt1loxP/loxP									14
28	Age, calorie restriction, and age of calorie restriction onset reduce maturation of natural killer cells in C57Bl/6 mice.	/pubmed/29914631	create date:2018/06/20 | first author:Duriancik DM	2018	C57Bl/6	Y	40	N	0	One sex	N	N	N													40	0
30	Repeated weight cycling in obese mice causes increased appetite and glucose intolerance.	/pubmed/29842854	create date:2018/05/31 | first author:Simonds SE	2018	C57BL/6J	Y		N		One sex	N	N	N
31	Calorie restriction induces reversible lymphopenia and lymphoid organ atrophy due to cell redistribution.	/pubmed/29804201	create date:2018/05/29 | first author:Contreras NA	2018	C57BL/6	Y		N		One sex	N	N	N						NA male/ female/ both humans
32	Common and unique transcriptional responses to dietary restriction and loss of insulin receptor substrate 1 (IRS1) in mice.	/pubmed/29779018	create date:2018/05/21 | first author:Page MM	2018	C57BL/6	N		N		XXXXXXX	Y	N	N						IRS1 +/+, -/-
33	Transcriptional profiling identifies strain-specific effects of caloric restriction and opposite responses in human and mouse white adipose tissue.	/pubmed/29708498	create date:2018/05/01 | first author:Swindell WR	2018	C57BL/6J, BALB/c, C3H, 129, CBA, DBA, B6C3F1	Y		N		One sex	N	N	N
34	Carnitine Acetyltransferase in AgRP Neurons Is Required for the Homeostatic Adaptation to Restricted Feeding in Male Mice.	/pubmed/29697769	create date:2018/04/27 | first author:Reichenbach A	2018	C57BL6J	Y		N		One sex	N	N	N						Agrp-Ires-cre
35	Obese Mice Losing Weight Due to trans-10,cis-12 Conjugated Linoleic Acid Supplementation or Food Restriction Harbor Distinct Gut Microbiota.	/pubmed/29659960	create date:2018/04/17 | first author:den Hartigh LJ	2018	C57BL/6	Y		N	0	One sex	N	N	N						Ldlr_/_								0
36	Caloric restriction mitigates age-associated hippocampal differential CG and non-CG methylation.	/pubmed/29631215	create date:2018/04/10 | first author:Hadad N	2018	C57BL/6	Y	24	N	0	One sex	N	N	N													24	0
37	Predominant gut Lactobacillus murinus strain mediates anti-inflammaging effects in calorie-restricted mice.	/pubmed/29562943	create date:2018/03/23 | first author:Pan F	2018	C57BL/6J	Y	20	N	0	One sex	N	N	N													20	0
38	Caloric Restriction Mimetic 2-Deoxyglucose Alleviated Inflammatory Lung Injury via Suppressing Nuclear Pyruvate Kinase M2-Signal Transducer and Activator of Transcription 3 Pathway.	/pubmed/29552018	create date:2018/03/20 | first author:Hu K	2018	BALB/c	Y		N	0	One sex	N	N	N														0
40	Effect of caloric restriction on liver function in young and old ApoE/LDLr-/- mice	/pubmed/29517190	create date:2018/03/09 | first author:Kostogrys RB	2018	C57BL/6J	Y		N	0	One sex	N	N	N						APOE/LDLR-/-								0
43	Long term rapamycin treatment improves mitochondrial DNA quality in aging mice.	/pubmed/29486228	create date:2018/02/28 | first author:Bielas J	2018	CByB6F1/J crossed with C3D2F1/J	N		N		XXXXXXX	N	Y	N						UM-HET3 mice
44	The effect of different levels of dietary restriction on glucose homeostasis and metabolic memory.	/pubmed/29455275	create date:2018/02/20 | first author:Matyi S	2018	C57BL/6	Y	60	N	0	One sex	N	N	N													60	0
47	Metabolic effects of short-term caloric restriction in mice with reduced insulin gene dosage.	/pubmed/29439088	create date:2018/02/14 | first author:Dommerholt MB	2018	C57BL/6J & 129	N		N		XXXXXXX	N	Y	N						Ins2 -/-, WT
48	Caloric restriction improves glucose homeostasis, yet increases cardiometabolic risk in caveolin-1-deficient mice.	/pubmed/29410348	create date:2018/02/08 | first author:Mayurasakorn K	2018	Cav1 KO	Y	48	N	0	One sex	N	N	N													48	0
52	Intermittent calorie restriction enhances epithelial-mesenchymal transition through the alteration of energy metabolism in a mouse tumor model.	/pubmed/29345287	create date:2018/01/19 | first author:Kusuoka O	2018	BALB/c	Y	70	N	0	One sex	N	N	N													70	0
57	Energy homeostasis in leptin deficient Lepob/ob mice.	/pubmed/29261744	create date:2017/12/21 | first author:Skowronski AA	2017	C57BL6	Y	48	N	0	One sex	N	N	N						ob/ob							48	0
59	Role of pyroptosis in normal cardiac response to calorie restriction and starvation.	/pubmed/29175212	create date:2017/11/28 | first author:Wang Z	2017	C57BL/6	Y	21	N	0	One sex	N	N	N													21	0
60	Caloric restriction can improve learning and memory in C57/BL mice probably via regulation of the AMPK signaling pathway.	/pubmed/29174968	create date:2017/11/28 | first author:Ma L	2017	C57/BL	Y	36	N	0	One sex	N	N	N													36	0
61	Mitochondrial intermediate peptidase is a novel regulator of sirtuin-3 activation by caloric restriction.	/pubmed/29151261	create date:2017/11/21 | first author:Kobayashi M	2017	B6/129S6	Y		N	0	One sex	N	N	N														0
64	Upregulation of the ALDOA/DNA-PK/p53 pathway by dietary restriction suppresses tumor growth.	/pubmed/29084207	create date:2017/10/31 | first author:Ma D	2017	BALB/c	N	0	Y		One sex	N	N	N						To generate tumours?							0
65	_-Catenin Directs Long-Chain Fatty Acid Catabolism in the Osteoblasts of Male Mice.	/pubmed/29077850	create date:2017/10/28 | first author:Frey JL	2017	B-catenin flox	Y		N		One sex	N	N	N
66	Butyrylcholinesterase gene transfer in obese mice prevents postdieting body weight rebound by suppressing ghrelin signaling.	/pubmed/28973869	create date:2017/10/05 | first author:Chen VP	2017	C57BL/6	Y	40	N	0	One sex	N	N	N													40	0
67	Stable Isotope Labeling Reveals Novel Insights Into Ubiquitin-Mediated Protein Aggregation With Age, Calorie Restriction, and Rapamycin Treatment.	/pubmed/28958078	create date:2017/09/29 | first author:Basisty NB	2017	C57BL/6	N	0	Y		One sex	N	N	N						F shows larger reponse to rapamycin than males (Fok, 2014)							0
68	Trans-10,cis-12 conjugated linoleic acid (t10-c12 CLA) treatment and caloric restriction differentially affect adipocyte cell turnover in obese and lean mice.	/pubmed/28945993	create date:2017/09/26 | first author:Yeganeh A	2017	C57BL/6J	Y	68	N	0	One sex	N	N	N						Leprdb (db/db)							68	0
69	SIRT1 is a positive regulator of in vivo bone mass and a therapeutic target for osteoporosis.	/pubmed/28937996	create date:2017/09/25 | first author:Zainabadi K	2017	C57BL/6J	Y		N		One sex	N	N	N
70	Effects of Chronic and Intermittent Calorie Restriction on Adropin Levels in Breast Cancer.	/pubmed/28922017	create date:2017/09/19 | first author:Tuna BG	2017	C57BL/6	N		Y	28	One sex	N	N	N						MMTV-TGFa mice								28
71	Caloric restriction delays age-related methylation drift.	/pubmed/28912502	create date:2017/09/16 | first author:Maegawa S	2017	C57BL/6	N	20	N	23	XXXXXXX	Y	N	N						Also human & Rhesus monkey							20	23
72	Caloric Restriction Promotes Structural and Metabolic Changes in the Skin.	/pubmed/28903047	create date:2017/09/14 | first author:Forni MF	2017	Swiss mice	N	0	Y	15	One sex	N	N	N						Interesting study							0	15
73	A history of obesity leaves an inflammatory fingerprint in liver and adipose tissue.	/pubmed/28901330	create date:2017/09/14 | first author:Fischer IP	2017	C57BL/6J	Y	70	N	0	One sex	N	N	N													70	0
76	Small nucleoli are a cellular hallmark of longevity.	/pubmed/28853436	create date:2017/08/31 | first author:Tiku V	2017	C57BL/6	Y		N		One sex	N	N	N						IRS1 KO & WT
77	Calorie restriction effects on circadian rhythms in gene expression are sex dependent.	/pubmed/28851928	create date:2017/08/31 | first author:Astafev AA	2017	C57B6J	N		N		XXXXXXX	N	Y	N
78	Caloric Restriction Prevents Carcinogen-Initiated Liver Tumorigenesis in Mice.	/pubmed/28847977	create date:2017/08/30 | first author:Ploeger JM	2017	C57BL/6	Y	72	N	0	One sex	N	N	N													72	0
79	Insulin-like growth factor 1 receptor regulates hypothermia during calorie restriction.	/pubmed/28827363	create date:2017/08/23 | first author:Cintron-Colon R	2017	C57BL/6	N		N		XXXXXXX	N	Y	N
80	Extracellular matrix remodeling and matrix metalloproteinase inhibition in visceral adipose during weight cycling in mice.	/pubmed/28826677	create date:2017/08/23 | first author:Caria CREP	2017	Swiss	Y		N		One sex	N	N	N
82	Aged Stem Cells Reprogram Their Daily Rhythmic Functions to Adapt to Stress.	/pubmed/28802040	create date:2017/08/13 | first author:Solanas G	2017	C57BL/6J; B6:129S	N		N		XXXXXXX	Y	N	N
83	Circadian Reprogramming in the Liver Identifies Metabolic Pathways of Aging.	/pubmed/28802039	create date:2017/08/13 | first author:Sato S	2017	C57B6/J	N		N		XXXXXXX	Y	N	N
84	Opposing effects on cardiac function by calorie restriction in different-aged mice.	/pubmed/28799249	create date:2017/08/12 | first author:Sheng Y	2017	C57BL/6J	Y	70	N	0	One sex	N	N	N													70	0
86	Aging and calorie restriction regulate the expression of miR-125a-5p and its target genes Stat3, Casp2 and Stard13.	/pubmed/28783714	create date:2017/08/08 | first author:Makwana K	2017	C57BL6J	N	0	Y		One sex	N	N	N													0
88	The effects of graded levels of calorie restriction: XI. Evaluation of the main hypotheses underpinning the life extension effects of CR using the hepatic transcriptome.	/pubmed/28768896	create date:2017/08/05 | first author:Derous D	2017	C57BL6	Y	48	N		One sex	N	N	N													48
89	The effect of calorie restriction on mouse skeletal muscle is sex, strain and time-dependent.	/pubmed/28698572	create date:2017/07/13 | first author:Boldrin L	2017	C57Bl/6; DBA/2	N		N		XXXXXXX	N	Y	N
90	Mice under Caloric Restriction Self-Impose a Temporal Restriction of Food Intake as Revealed by an Automated Feeder System.	/pubmed/28683292	create date:2017/07/07 | first author:Acosta-Rodríguez VA	2017	C57BL/6J	Y	36	N	0	One sex	N	N	N													36	0
91	Nutrient sensing modulates malaria parasite virulence.	/pubmed/28678779	create date:2017/07/06 | first author:Mancio-Silva L	2017	SCID	Y		N	0	One sex	N	N	N														0
92	Weight Changes and Metabolic Outcomes in Calorie-Restricted Obese Mice Fed High-Fat Diets Containing Corn or Flaxseed Oil: Physiological Role of Sugar Replacement with Polyphenol-Rich Grape.	/pubmed/28665260	create date:2017/07/01 | first author:Ansar H	2017	C57BL/6	Y	75	N	0	One sex	N	N	N													75	0
94	Sex-dependent Differences in Liver and Gut Metabolomic Profiles With Acarbose and Calorie Restriction in C57BL/6 Mice.	/pubmed/28651373	create date:2017/06/28 | first author:Gibbs VK	2017	C57BL/6	N	12	N	12	XXXXXXX	N	Y	N						Transcriptomics							12	12
95	Caloric restriction protects livers from ischemia/reperfusion damage by preventing Ca(2+)-induced mitochondrial permeability transition.	/pubmed/28642067	create date:2017/06/24 | first author:Menezes-Filho SL	2017	Swiss	Y		N	0	One sex	N	N	N														0
96	Effects of mild calorie restriction on lipid metabolism and inflammation in liver and adipose tissue.	/pubmed/28630003	create date:2017/06/21 | first author:Park CY	2017	C57BL/6N	Y	49	N	0	One sex	N	N	N													49	0
97	Lifelong dietary intervention does not affect hematopoietic stem cell function.	/pubmed/28625745	create date:2017/06/20 | first author:Lazare S	2017	NA	N		N		One sex	N	N	Y
98	The effect of caloric restriction on the forelimb skeletal muscle fibers of the hypertrophic myostatin null mice.	/pubmed/28622884	create date:2017/06/18 | first author:Elashry MI	2017	C57BL/6	Y		N	0	One sex	N	N	N						Mstn-/- & WT								0
99	Transcriptional activation of RagD GTPase controls mTORC1 and promotes cancer growth.	/pubmed/28619945	create date:2017/06/18 | first author:Di Malta C	2017	C57BL/6	Y		N		One sex	N	N	N						Albumin-Cre, Tcfeb-flox and Tfe3-knockout
102	A dual agonist of farnesoid X receptor (FXR) and the G protein-coupled receptor TGR5, INT-767, reverses age-related kidney disease in mice.	/pubmed/28596381	create date:2017/06/10 | first author:Wang XX	2017	C57BL/6; Ames	N		N		One sex	N	N	Y
103	High-intensity interval training and calorie restriction promote remodeling of glucose and lipid metabolism in diet-induced obesity.	/pubmed/28588097	create date:2017/06/08 | first author:Davis RAH	2017	C57BL6J	Y	32	N	0	One sex	N	N	N													32	0
104	The Effects of Graded Levels of Calorie Restriction: X. Transcriptomic Responses of Epididymal Adipose Tissue.	/pubmed/28575190	create date:2017/06/03 | first author:Derous D	2017	C57BL6	Y	49	N	0	One sex	N	N	N													49	0
105	Identification of tissue-specific transcriptional markers of caloric restriction in the mouse and their use to evaluate caloric restriction mimetics.	/pubmed/28556428	create date:2017/05/31 | first author:Barger JL	2017	C57BL6/J	Y		N	0	One sex	N	N	N														0
106	Anti-aging drugs reduce hypothalamic inflammation in a sex-specific manner.	/pubmed/28544365	create date:2017/05/26 | first author:Sadagurski M	2017	UM_HET3	N		N		XXXXXXX	N	Y	N						UM_HET3
107	Differential effects of early-life nutrient restriction in long-lived GHR-KO and normal mice.	/pubmed/28523599	create date:2017/05/20 | first author:Fang Y	2017	BALB/c, C57BL/6, and C3H/J	N	120	N	115	XXXXXXX	N	Y	N						GHR-KO & WT							120	115
109	Short-term caloric restriction exerts neuroprotective effects following mild traumatic brain injury by promoting autophagy and inhibiting astrocyte activation.	/pubmed/28495608	create date:2017/05/13 | first author:Liu Y	2017	C57BL/6	Y	45	N	0	One sex	N	N	N													45	0
110	Role of DNA methylation in the dietary restriction mediated cellular memory.	/pubmed/28477138	create date:2017/05/10 | first author:Unnikrishnan A	2017	C57BL/6	Y		N	0	One sex	N	N	N														0
111	Caloric restriction prevents the progression of murine AApoAII amyloidosis.	/pubmed/28434314	create date:2017/04/25 | first author:Sawashita J	2017	R1.P1-Apoa2c	N	0	Y	11	One sex	N	N	N						R1.P1-Apoa2c							0	11
112	Differential sympathetic outflow to adipose depots is required for visceral fat loss in response to calorie restriction.	/pubmed/28394360	create date:2017/04/11 | first author:Sipe LM	2017	C57BL/6J	Y	24	N	0	One sex	N	N	N													24	0
113	Selected life-extending interventions reduce arterial CXCL10 and macrophage colony-stimulating factor in aged mouse arteries.	/pubmed/28390264	create date:2017/04/09 | first author:Trott DW	2017	B6D2F1; UM-HET3	N		N		One sex	N	N	Y						UM-HET3
114	AMP-activated kinase and the endogenous endocannabinoid system might contribute to antinociceptive effects of prolonged moderate caloric restriction in mice.	/pubmed/28381108	create date:2017/04/07 | first author:King-Himmelreich TS	2017	C57BL/6	Y	12	N	0	One sex	N	N	N						AMPK_2-/-							12	0
115	Central activation of the A(1) adenosine receptor in fed mice recapitulates only some of the attributes of daily torpor.	/pubmed/28378088	create date:2017/04/06 | first author:Vicent MA	2017	C57Bl/6J	N	0	Y	26	One sex	N	N	N													0	26
116	Food restriction affects Y-maze spatial recognition memory in developing mice.	/pubmed/28377130	create date:2017/04/06 | first author:Fu Y	2017	ICR	Y	50	N	0	One sex	N	N	N													50	0
117	Energy Balance Modulation Impacts Epigenetic Reprogramming, ER_ and ER_ Expression, and Mammary Tumor Development in MMTV-neu Transgenic Mice.	/pubmed/28373182	create date:2017/04/05 | first author:Rossi EL	2017	MMTVneu	N	0	Y	86	One sex	N	N	N													0	86
118	Epigenetic aging signatures in mice livers are slowed by dwarfism, calorie restriction and rapamycin treatment.	/pubmed/28351423	create date:2017/03/30 | first author:Wang T	2017	Ames ; UM-HET3	N		Y		One sex	N	N	N
119	Caloric Restriction Mimetics Slow Aging of Neuromuscular Synapses and Muscle Fibers.	/pubmed/28329051	create date:2017/03/23 | first author:Stockinger J	2017	C57BL6J	Y		N	0	One sex	N	N	N														0
120	Hyper- and hypo- nutrition studies of the hepatic transcriptome and epigenome suggest that PPAR_ regulates anaerobic glycolysis.	/pubmed/28282965	create date:2017/03/12 | first author:Soltis AR	2017	C57BL6J	Y		N	0	One sex	N	N	N														0
121	Caloric Restriction Protects against Lactacystin-Induced Degeneration of Dopamine Neurons Independent of the Ghrelin Receptor.	/pubmed/28273852	create date:2017/03/10 | first author:Coppens J	2017	129Sv/Evbrd(LEX1)/C57BL/6	Y		N	0	One sex	N	N	N														0
122	Dietary restriction protects against diethylnitrosamine-induced hepatocellular tumorigenesis by restoring the disturbed gene expression profile.	/pubmed/28262799	create date:2017/03/07 | first author:Duan T	2017	C57BL6	Y		N	0	One sex	N	N	N														0
123	Sterol regulatory element-binding protein-1c orchestrates metabolic remodeling of white adipose tissue by caloric restriction.	/pubmed/28256090	create date:2017/03/04 | first author:Fujii N	2017	B6; 129S6_Srebf1tm1Mbr/J	N		N		One sex	N	N	Y
124	Regulation of 11_-hydroxysteroid dehydrogenase type 1 following caloric restriction and re-feeding is species dependent.	/pubmed/28254522	create date:2017/03/04 | first author:Loerz C	2017	C57BL/6JRj	Y		N	0	One sex	N	N	N														0
125	Metabolically distinct weight loss by 10,12 CLA and caloric restriction highlight the importance of subcutaneous white adipose tissue for glucose homeostasis in mice.	/pubmed/28245284	create date:2017/03/01 | first author:den Hartigh LJ	2017	C57Bl/6	Y		N	0	One sex	N	N	N						Ldlr-/-; Male mice were used because they more reliably become obese and insulin resistant than female mice								0
126	Caloric restriction reduces the systemic progression of mouse AApoAII amyloidosis.	/pubmed/28225824	create date:2017/02/23 | first author:Li L	2017	R1.P1-Apoa2c	N	0	Y	32	One sex	N	N	N						R1.P1-Apoa2c;							0	32
127	Dietary restriction reduces blood lipids and ameliorates liver function of mice with hyperlipidemia.	/pubmed/28224418	create date:2017/02/23 | first author:Gao HT	2017	ICR	Y	60	N	0	One sex	N	N	N													60	0
129	The effects of graded levels of calorie restriction: VIII. Impact of short term calorie and protein restriction on basal metabolic rate in the C57BL/6 mouse.	/pubmed/28193912	create date:2017/02/15 | first author:Mitchell SE	2017	C57BL6	Y	57	N	0	One sex	N	N	N													57	0
131	Effects of calorie restriction on the lifespan and healthspan of POLG mitochondrial mutator mice.	/pubmed/28158260	create date:2017/02/06 | first author:Someya S	2017	C57Bl/6J	N		N		XXXXXXX	N	Y	N						PolgD257A/D257A
132	Aging and caloric restriction impact adipose tissue, adiponectin, and circulating lipids.	/pubmed/28156058	create date:2017/02/06 | first author:Miller KN	2017	B6C3F1	Y		N	0	One sex	N	N	N														0
133	The effects of graded levels of calorie restriction: IX. Global metabolomic screen reveals modulation of carnitines, sphingolipids and bile acids in the liver of C57BL/6 mice.	/pubmed/28139067	create date:2017/02/01 | first author:Green CL	2017	C57BL6	Y		N	0	One sex	N	N	N														0
134	Low Cytochrome Oxidase 1 Links Mitochondrial Dysfunction to Atherosclerosis in Mice and Pigs.	/pubmed/28122051	create date:2017/01/26 | first author:Holvoet P	2017	C57BL6	N	20	N	20	One sex	N	N	Y						LDLR-/- ob/ob & WT ob/ob							20	20
135	A signature of renal stress resistance induced by short-term dietary restriction, fasting, and protein restriction.	/pubmed/28102354	create date:2017/01/20 | first author:Jongbloed F	2017	C57BL/6	Y	45	N	0	One sex	N	N	N													45	0
136	Neuropeptide Y resists excess loss of fat by lipolysis in calorie-restricted mice: a trait potential for the life-extending effect of calorie restriction.	/pubmed/28101970	create date:2017/01/20 | first author:Park S	2017	129S_Npytm1Rpa/J & 129S6/SvEvTac	Y		N		One sex	N	N	N						NPY-/-
139	Age-related arterial immune cell infiltration in mice is attenuated by caloric restriction or voluntary exercise.	/pubmed/28012941	create date:2016/12/26 | first author:Trott DW	2016	B6D2F1	Y	35	N	0	One sex	N	N	N													35	0
140	Intermittent calorie restriction largely counteracts the adverse health effects of a moderate-fat diet in aging C57BL/6J mice.	/pubmed/27995741	create date:2016/12/21 | first author:Rusli F	2016	C57BL/6J	Y	488	N	0	One sex	N	N	N													488	0
141	High aminopeptidase A activity contributes to blood pressure control in ob/ob mice by AT(2) receptor-dependent mechanism.	/pubmed/27940965	create date:2016/12/13 | first author:Morais RL	2016	C57Bl/6	Y	13	N	0	One sex	N	N	N						ob/ob, apoE-/-							13	0
143	Evaluation of candidate reference genes for RT-qPCR studies in three metabolism related tissues of mice after caloric restriction.	/pubmed/27922100	create date:2016/12/07 | first author:Gong H	2016	C57BL/6	Y	10	N	0	One sex	N	N	N													10	0
144	Long-term caloric restriction in ApoE-deficient mice results in neuroprotection via Fgf21-induced AMPK/mTOR pathway.	/pubmed/27902456	create date:2016/12/03 | first author:Rühlmann C	2016	B6.129P2-Apoetm1Unc N11	N	0	Y	60	One sex	N	N	N						ApoE-/-							0	60
145	Caloric restriction ameliorates cardiomyopathy in animal model of diabetes.	/pubmed/27884680	create date:2016/11/26 | first author:Cohen K	2016	C57BLKS/J leprdb/leprdb	Y	16	N	0	One sex	N	N	N						leprdb/leprdb							16	0
147	Intestinal PPAR_ signalling is required for sympathetic nervous system activation in response to caloric restriction.	/pubmed/27853235	create date:2016/11/18 | first author:Duszka K	2016	C57/Bl6/SV129	Y		N	0	One sex	N	N	N						PPAR_floxVillinCre+ & WT								0
148	Caloric restriction preserves memory and reduces anxiety of aging mice with early enhancement of neurovascular functions.	/pubmed/27829242	create date:2016/11/10 | first author:Parikh I	2016	C57BL/6N	Y	24	N	0	One sex	N	N	N													24	0
150	Calorie restriction protects against experimental abdominal aortic aneurysms in mice.	/pubmed/27670594	create date:2016/11/05 | first author:Liu Y	2016	C57BL/6J	Y	82	N	0	One sex	N	N	N						SM22_-Cre+/_;Sirt1flox/flox;ApoE-/- & WT							82	0
154	Differential Regulation of Hippocampal IGF-1-Associated Signaling Proteins by Dietary Restriction in Aging Mouse.	/pubmed/27718093	create date:2016/10/09 | first author:Hadem IKH	2016	BALB/c	N	0	Y	15	One sex	N	N	N						ADF							0	15
155	Altered gut microbiota in female mice with persistent low body weights following removal of post-weaning chronic dietary restriction.	/pubmed/27716401	create date:2016/10/08 | first author:Chen J	2016	BALB/c	N	0	Y	24	One sex	N	N	N						F chosen as F>>M in Anorexia							0	24
158	Caloric restriction increases brain mitochondrial calcium retention capacity and protects against excitotoxicity.	/pubmed/27619151	create date:2016/09/14 | first author:Amigo I	2016	Swiss	Y	2	N	0	One sex	N	N	N													2	0
159	Disentangling the effect of dietary restriction on mitochondrial function using recombinant inbred mice.	/pubmed/27597651	create date:2016/09/07 | first author:Mulvey L	2016	ILSXISS	N	0	Y		One sex	N	N	N													0
161	Dietary energy restriction reduces high-fat diet-enhanced metastasis of Lewis lung carcinoma in mice.	/pubmed/27582541	create date:2016/09/02 | first author:Sundaram S	2016	C57BL/6	Y	105	N	0	One sex	N	N	N													105	0
162	Caloric Restriction Leads to Browning of White Adipose Tissue through Type 2 Immune Signaling.	/pubmed/27568549	create date:2016/08/30 | first author:Fabbiano S	2016	C57BL/6J; BALB/c	Y		N	0	One sex	N	N	N						Cd45.1+, Stat6-/-, Il4ra-/- & WTs								0
163	Restricted diet delays accelerated ageing and genomic stress in DNA-repair-deficient mice.	/pubmed/27556946	create date:2016/08/25 | first author:Vermeij WP	2016	C57BL6J/FVB	N		N		XXXXXXX	N	Y	N						Ercc1 _/-, Xpg-/- & WT
164	_1-Adrenergic receptor deficiency in ghrelin-expressing cells causes hypoglycemia in susceptible individuals.	/pubmed/27548523	create date:2016/08/23 | first author:Mani BK	2016	C57BL/6N	Y		N		One sex	N	N	N						GC-_1AR-/- & WT
165	Caloric restriction selectively reduces the GABAergic phenotype of mouse hypothalamic proopiomelanocortin neurons.	/pubmed/27531218	create date:2016/08/18 | first author:Jarvie BC	2016	C57BL/6	N	93	N	110	XXXXXXX	N	Y	N						POMC_Cre transgenic							93	110
166	Partitioning the variance in calorie restriction-induced weight and fat loss in outbred mice.	/pubmed/27527110	create date:2016/08/17 | first author:Vaanholt LM	2016	MF1 Outbred	N		N		XXXXXXX	Y	N	N						Interesting									136
167	The interaction of fasting, caloric restriction, and diet-induced obesity with 17_-estradiol on the expression of KNDy neuropeptides and their receptors in the female mouse.	/pubmed/27507595	create date:2016/08/11 | first author:Yang JA	2016	C57/BL; Swiss Webster	N	0	Y		One sex	N	N	N						Interesting							0
169	Short-term moderate diet restriction in adulthood can reverse oxidative, cardiovascular and metabolic alterations induced by postnatal overfeeding in mice.	/pubmed/27465434	create date:2016/07/29 | first author:Li N	2016	C57BL/6	Y		N	22	One sex	N	N	N						Interesting								22
170	Long-term caloric restriction in mice may prevent age-related learning impairment via suppression of apoptosis.	/pubmed/27452805	create date:2016/07/28 | first author:Ma L	2016	C57/BL	Y	30	N	0	One sex	N	N	N													30	0
172	Caloric restriction of db/db mice reverts hepatic steatosis and body weight with divergent hepatic metabolism.	/pubmed/27439777	create date:2016/07/22 | first author:Kim KE	2016	C57BL/6J	Y	30	N	0	One sex	N	N	N						db/db & db/m							30	0
174	Lactobacillus fermentum CRL1446 Ameliorates Oxidative and Metabolic Parameters by Increasing Intestinal Feruloyl Esterase Activity and Modulating Microbiota in Caloric-Restricted Mice.	/pubmed/27399766	create date:2016/07/12 | first author:Russo M	2016	Balb/c	Y	84	N	0	One sex	N	N	N													84	0
175	Dietary Protective Effects Against Hepatocellular Carcinoma Development in Mdr2-/- Knockout Mice.	/pubmed/27381607	create date:2016/07/07 | first author:Gentileschi MP	2016	FVB.129P2-Abcb4tm1Bo & FVB/NJ	N		N		One sex	N	N	Y						Mdr2-/-									40
176	Age-dependent modulation of fasting and long-term dietary restriction on acetylcholinesterase in non-neuronal tissues of mice.	/pubmed/27379505	create date:2016/07/06 | first author:Suchiang K	2016	Balb/c	N	0	Y		One sex	N	N	N													0
177	mTORC1 and SIRT1 Cooperate to Foster Expansion of Gut Adult Stem Cells during Calorie Restriction.	/pubmed/27345368	create date:2016/06/28 | first author:Igarashi M	2016	C57BL/6	N		N		One sex	N	N	Y						VilKO, Lgr5-EGFP-IRES-CreERT2: Sirt1/sir2d
178	Daily leptin blunts marrow fat but does not impact bone mass in calorie-restricted mice.	/pubmed/27340200	create date:2016/06/25 | first author:Devlin MJ	2016	C57Bl/6J	N	0	Y	21	One sex	N	N	N													0	21
179	Effects of caloric restriction on O-GlcNAcylation, Ca(2+) signaling, and learning impairment in the hippocampus of ob/ob mice.	/pubmed/27318140	create date:2016/06/19 | first author:Jeon BT	2016	C57BL/6J	Y	30	N	0	One sex	N	N	N						ob/ob & WT							30	0
180	Effects of Sex, Strain, and Energy Intake on Hallmarks of Aging in Mice.	/pubmed/27304509	create date:2016/06/16 | first author:Mitchell SJ	2016	B6D2F1/J, D2B6F1/J, B6, D2	N	55	N	71	XXXXXXX	N	Y	N													55	71
181	Caloric Restriction Normalizes Obesity-Induced Alterations on Regulators of Skeletal Muscle Growth Signaling.	/pubmed/27289530	create date:2016/06/13 | first author:Dungan CM	2016	C57Bl/6	Y	24	N	0	One sex	N	N	N													24	0
183	Metabolomics Insights into the Modulatory Effects of Long-Term Low Calorie Intake in Mice.	/pubmed/27267303	create date:2016/06/09 | first author:Wu J	2016	C57BL/6J	Y	120	N	0	One sex	N	N	N													120	0
184	Adiponectin mediates the additive effects of combining daily exercise with caloric restriction for treatment of non-alcoholic fatty liver.	/pubmed/27216820	create date:2016/05/25 | first author:Cho J	2016	C57BL/6	Y	50	N	0	One sex	N	N	N													50	0
185	Calorie-induced ER stress suppresses uroguanylin satiety signaling in diet-induced obesity.	/pubmed/27214655	create date:2016/05/24 | first author:Kim GW	2016	C57BL/6J	N		N		One sex	N	N	Y						ob/ob, Gucy2c-/-, Camk2a-Cre-ERT2, Rosa-STOPloxP/loxP-Guca2b									17
187	Calorie restriction regulates circadian clock gene expression through BMAL1 dependent and independent mechanisms.	/pubmed/27170536	create date:2016/05/14 | first author:Patel SA	2016	C57BL/6J	Y	3	N	0	One sex	N	N	N						Bmal1-/-							3	0
188	Caloric restriction blocks neuropathology and motor deficits in Machado-Joseph disease mouse models through SIRT1 pathway.	/pubmed/27165717	create date:2016/05/12 | first author:Cunha-Santos J	2016	C57Bl/6	N		N		One sex	N	N	Y						Tg MJD,									25
189	Caloric Restriction Paradoxically Increases Adiposity in Mice With Genetically Reduced Insulin.	/pubmed/27145011	create date:2016/05/05 | first author:Dionne DA	2016	C57BL/6 & 129sv	N	0	Y		One sex	N	N	N						Ins1-/-, Ins2-/-							0
192	The effects of graded levels of calorie restriction: VII. Topological rearrangement of hypothalamic aging networks.	/pubmed/27115072	create date:2016/04/27 | first author:Derous D	2016	C57BL6	Y	49	N	0	One sex	N	N	N													49	0
193	Effect of calorie restriction on spontaneous physical activity and body mass in mice divergently selected for basal metabolic rate (BMR).	/pubmed/27090226	create date:2016/04/20 | first author:Brz_k P	2016	Swiss-Webster	N		N		XXXXXXX	Y	N	N
194	Daily exposure to a touchscreen-paradigm and associated food restriction evokes an increase in adrenocortical and neural activity in mice.	/pubmed/27059527	create date:2016/04/10 | first author:Mallien AS	2016	C57BL/6N	Y	40	N	0	One sex	N	N	N													40	0
196	BDNF-Val66Met variant and adolescent stress interact to promote susceptibility to anorexic behavior in mice.	/pubmed/27045846	create date:2016/04/06 | first author:Madra M	2016	C57BL6	N		Y	0	One sex	N	N	N						Increased previlance of anxiety & eating disorders in females; hBDNFVal/Met								0
197	Caloric restriction coupled with radiation decreases metastatic burden in triple negative breast cancer.	/pubmed/27027731	create date:2016/03/31 | first author:Simone BA	2016	BALB/c	N	0	Y	40	One sex	N	N	N													0	40
198	Gender Differences in Response to Prolonged Every-Other-Day Feeding on the Proliferation and Apoptosis of Hepatocytes in Mice.	/pubmed/27007393	create date:2016/03/24 | first author:Piotrowska K	2016	C57Bl/6	N		N		XXXXXXX	N	Y	N						Reports sex difference									24
199	The effects of graded levels of calorie restriction: V. Impact of short term calorie and protein restriction on physical activity in the C57BL/6 mouse.	/pubmed/27007156	create date:2016/03/24 | first author:Mitchell SE	2016	C57BL6	Y		N	0	One sex	N	N	N														0
200	Reversibility of _-Cell-Specific Transcript Factors Expression by Long-Term Caloric Restriction in db/db Mouse.	/pubmed/26998492	create date:2016/03/22 | first author:Sheng C	2016	C57BLKS/J-Leprdb/Leprdb & db/m	Y	3	N	0	One sex	N	N	N													3	0
201	Metformin-mediated increase in DICER1 regulates microRNA expression and cellular senescence.	/pubmed/26990999	create date:2016/03/19 | first author:Noren Hooten N	2016	C57BL/6	Y		N		One sex	N	N	N
202	Ghrelin-AMPK Signaling Mediates the Neuroprotective Effects of Calorie Restriction in Parkinson's Disease.	/pubmed/26961958	create date:2016/03/11 | first author:Bayliss JA	2016	C57BL/6J	Y	16	N	0	One sex	N	N	N						ghrelin WT/KO							16	0
203	Measuring aging rates of mice subjected to caloric restriction and genetic disruption of growth hormone signaling.	/pubmed/26959761	create date:2016/03/10 | first author:Koopman JJ	2016	Could not see clear evidence of CR in mice in vivo	Could not see clear evidence of CR in mice in vivo	Could not see clear evidence of CR in mice in vivo	Could not see clear evidence of CR in mice in vivo	Could not see clear evidence of CR in mice in vivo	XXXXXXX	Could not see clear evidence of CR in mice in vivo	Could not see clear evidence of CR in mice in vivo	Could not see clear evidence of CR in mice in vivo	Could not see clear evidence of CR in mice in vivo	Could not see clear evidence of CR in mice in vivo	Could not see clear evidence of CR in mice in vivo	Could not see clear evidence of CR in mice in vivo	Could not see clear evidence of CR in mice in vivo	Could not see clear evidence of CR in mice in vivo	Could not see clear evidence of CR in mice in vivo	Could not see clear evidence of CR in mice in vivo	Could not see clear evidence of CR in mice in vivo	Could not see clear evidence of CR in mice in vivo	Could not see clear evidence of CR in mice in vivo	Could not see clear evidence of CR in mice in vivo	Could not see clear evidence of CR in mice in vivo	Could not see clear evidence of CR in mice in vivo	Could not see clear evidence of CR in mice in vivo
204	Dietary restriction improves repopulation but impairs lymphoid differentiation capacity of hematopoietic stem cells in early aging.	/pubmed/26951333	create date:2016/03/10 | first author:Tang D	2016	C57BL/6J	N		N		One sex	N	N	Y						p53 KO, Puma KO, Vav-Bcl2									12
205	The effects of graded levels of calorie restriction: VI. Impact of short-term graded calorie restriction on transcriptomic responses of the hypothalamic hunger and circadian signaling pathways.	/pubmed/26945906	create date:2016/03/08 | first author:Derous D	2016	C57BL6	Y	49	N	0	One sex	N	N	N													49	0
206	Calorie restriction-induced SIRT6 activation delays aging by suppressing NF-_B signaling.	/pubmed/26940461	create date:2016/03/05 | first author:Zhang N	2016	C57BL/6	Y	17	N	0	One sex	N	N	N													17	0
207	Energy restriction impairs dendritic cell development in C57BL/6J mice.	/pubmed/26876761	create date:2016/02/16 | first author:Duriancik DM	2016	C57BL/6J	Y		N	0	One sex	N	N	N														0
208	Omega-3 fatty acids partially revert the metabolic gene expression profile induced by long-term calorie restriction.	/pubmed/26875793	create date:2016/02/16 | first author:López-Domínguez JA	2016	C57BL/6	Y	16	N	0	One sex	N	N	N						Control group was IF too							16	0
209	Cardiac Sirt1 mediates the cardioprotective effect of caloric restriction by suppressing local complement system activation after ischemia-reperfusion.	/pubmed/26873964	create date:2016/02/14 | first author:Yamamoto T	2016	C57BL/6J	Y		N	0	One sex	N	N	N						CM-Sirt1 KO								0
210	Dietary fat composition influences glomerular and proximal convoluted tubule cell structure and autophagic processes in kidneys from calorie-restricted mice.	/pubmed/26853994	create date:2016/02/09 | first author:Calvo-Rubio M	2016	C57BL/6	Y	64	N	0	One sex	N	N	N						Control group was IF too							64	0
211	Reprogramming of defended body weight after Roux-En-Y gastric bypass surgery in diet-induced obese mice.	/pubmed/26847390	create date:2016/02/06 | first author:Hao Z	2016	C57BL6J	Y		N	0	One sex	N	N	N														0
212	Metabolic Benefit of Chronic Caloric Restriction and Activation of Hypothalamic AGRP/NPY Neurons in Male Mice Is Independent of Ghrelin.	/pubmed/26812158	create date:2016/01/27 | first author:Rogers NH	2016	C57BL6J	Y		N	0	One sex	N	N	N														0
213	A CREB-Sirt1-Hes1 Circuitry Mediates Neural Stem Cell Response to Glucose Availability.	/pubmed/26804914	create date:2016/01/26 | first author:Fusco S	2016	C57BL6J; CD1/129J	N		N		One sex	N	N	Y						Sirt-1 KO
215	Metformin Restores Parkin-Mediated Mitophagy, Suppressed by Cytosolic p53.	/pubmed/26784190	create date:2016/01/20 | first author:Song YM	2016	C57bl/6j	N		N		One sex	N	N	Y						ob/ob									24
216	A mild reduction of food intake slows disease progression in an orthologous mouse model of polycystic kidney disease.	/pubmed/26764208	create date:2016/01/15 | first author:Kipp KR	2016	129sv	N		N		One sex	N	N	Y						PKDcond/cond:NesCre
217	Calorie Restriction Increases P-Glycoprotein and Decreases Intestinal Absorption of Digoxin in Mice.	/pubmed/26744253	create date:2016/01/09 | first author:Renaud HJ	2016	C57BL/6	Y	10	N	0	One sex	N	N	N													10	0
218	The Impact of Dietary Energy Intake Early in Life on the Colonic Microbiota of Adult Mice.	/pubmed/26744222	create date:2016/01/09 | first author:Xu J	2016	C57BL/6N	N	0	Y	186	One sex	N	N	N													0	186
219	FoxO1 signaling plays a pivotal role in the cardiac telomere biology responses to calorie restriction.	/pubmed/26708219	create date:2015/12/29 | first author:Makino N	2015	C57BL/6J	N		N		One sex	N	N	Y						FoxO1+/-
220	Circadian clocks govern calorie restriction-mediated life span extension through BMAL1- and IGF-1-dependent mechanisms.	/pubmed/26700733	create date:2015/12/25 | first author:Patel SA	2015	C57B6/J	Y	5	N	0	One sex	N	N	N						Bmal1-/- & WT							5	0
221	Expansion of Bone Marrow Adipose Tissue During Caloric Restriction Is Associated With Increased Circulating Glucocorticoids and Not With Hypoleptinemia.	/pubmed/26696121	create date:2015/12/24 | first author:Cawthorn WP	2015	C57BL/6J	N	13	N	11	XXXXXXX	N	Y	N													13	11
224	Caloric restriction improves diabetes-induced cognitive deficits by attenuating neurogranin-associated calcium signaling in high-fat diet-fed mice.	/pubmed/26661177	create date:2015/12/15 | first author:Kim H	2015	C57BL/6	Y	75	N	0	One sex	N	N	N													75	0
225	Short-Term Dietary Restriction Rescues Mice From Lethal Abdominal Sepsis and Endotoxemia and Reduces the Inflammatory/Coagulant Potential of Adipose Tissue.	/pubmed/26646465	create date:2015/12/10 | first author:Starr ME	2015	C57BL/6	Y	20	N	0	One sex	N	N	N													20	0
226	Angptl4 links _-cell proliferation following glucagon receptor inhibition with adipose tissue triglyceride metabolism.	/pubmed/26621734	create date:2015/12/02 | first author:Ben-Zvi D	2015	C57BL/6	N	15	N	0	One sex	N	N	Y						Angptl4-/-, db/db							15	0
227	Protection against renal ischemia-reperfusion injury through hormesis? Dietary intervention versus cold exposure.	/pubmed/26616751	create date:2015/12/01 | first author:Shushimita S	2015	C57Bl/6	Y	24	N	0	One sex	N	N	N													24	0
228	Whole-transcriptome analysis of mouse adipose tissue in response to short-term caloric restriction.	/pubmed/26606930	create date:2015/11/27 | first author:Kim SS	2015	C57BL/6N	Y	12	N	0	One sex	N	N	N						Transcriptomics							12	0
229	Strain- and Diet-Related Lesion Variability in Aging DBA/2, C57BL/6, and DBA/2xC57BL/6 F1 Mice.	/pubmed/26604215	create date:2015/11/26 | first author:Harbison CE	2015	DBA/2, C57BL/6, DBA/2xC57BL/6	N		N		XXXXXXX	N	Y	N															180
230	Dietary Restriction-Induced Alterations in Bone Phenotype: Effects of Lifelong Versus Short-Term Caloric Restriction on Femoral and Vertebral Bone in C57BL/6 Mice.	/pubmed/26572927	create date:2015/11/18 | first author:Behrendt AK	2015	C57BL/6	N	0	Y		One sex	N	N	N													0
231	Reduced in vivo hepatic proteome replacement rates but not cell proliferation rates predict maximum lifespan extension in mice.	/pubmed/26541492	create date:2015/11/07 | first author:Thompson AC	2015	C57BL/6	N	0	Y	28	One sex	N	N	N													0	28
233	ABCG1 regulates mouse adipose tissue macrophage cholesterol levels and ratio of M1 to M2 cells in obesity and caloric restriction.	/pubmed/26489644	create date:2015/10/23 | first author:Wei H	2015	C57BL/6	Y	40	N	0	One sex	N	N	N						Abcg1-/-,							40	0
235	Epigenetic modifications in mouse cerebellar Purkinje cells: effects of aging, caloric restriction, and overexpression of superoxide dismutase 1 on 5-methylcytosine and 5-hydroxymethylcytosine.	/pubmed/26476235	create date:2015/10/18 | first author:Lardenoije R	2015	C57B16J	Y	240	N	0	One sex	N	N	N						SOD1 overexp,							240	0
236	Curcumin Mimics the Neurocognitive and Anti-Inflammatory Effects of Caloric Restriction in a Mouse Model of Midlife Obesity.	/pubmed/26473740	create date:2015/10/17 | first author:Sarker MR	2015	C57BL/6JNia	Y	57	N	0	One sex	N	N	N													57	0
237	Short-term calorie restriction enhances adult hippocampal neurogenesis and remote fear memory in a Ghsr-dependent manner.	/pubmed/26460782	create date:2015/10/16 | first author:Hornsby AK	2015	C57BL/6J	N	36	N	24	XXXXXXX	Y	N	N						Ghsr-/- & WT							36	24
238	Glycine supplementation during calorie restriction accelerates fat loss and protects against further muscle loss in obese mice.	/pubmed/26431812	create date:2015/10/04 | first author:Caldow MK	2015	C57BL/6	Y	30	N	0	One sex	N	N	N													30	0
239	Are sirtuins markers of ovarian aging?	/pubmed/26403315	create date:2015/09/26 | first author:Zhang J	2015	C57BL/6	N	0	Y	12	One sex	N	N	N													0	12
240	Age- and Tissue-Dependent Modulation of IGF-1/PI3K/Akt Protein Expression by Dietary Restriction in Mice.	/pubmed/26372898	create date:2015/09/16 | first author:Hadem IK	2015	BALB/c	N	0	Y		One sex	N	N	N													0
241	The Role of Sirt1 in Bile Acid Regulation during Calorie Restriction in Mice.	/pubmed/26372644	create date:2015/09/16 | first author:Fu ZD	2015	C57BL/6	Y	5	N	0	One sex	N	N	N						Sirt1-LKO							5	0
242	Mannan-Binding Lectin Is Involved in the Protection against Renal Ischemia/Reperfusion Injury by Dietary Restriction.	/pubmed/26367533	create date:2015/09/15 | first author:Shushimita S	2015	C57/Bl6	Y	18	N	0	One sex	N	N	N													18	0
243	The effects of graded levels of calorie restriction: IV. Non-linear change in behavioural phenotype of mice in response to short-term calorie restriction.	/pubmed/26306002	create date:2015/08/26 | first author:Lusseau D	2015	C57BL6	Y	39	N	0	One sex	N	N	N													39	0
244	The effects of graded levels of calorie restriction: III. Impact of short term calorie and protein restriction on mean daily body temperature and torpor use in the C57BL/6 mouse.	/pubmed/26286956	create date:2015/08/20 | first author:Mitchell SE	2015	C57BL6	Y	45	N	0	One sex	N	N	N													45	0
246	Calorie Restriction Suppresses Age-Dependent Hippocampal Transcriptional Signatures.	/pubmed/26221964	create date:2015/07/30 | first author:Schafer MJ	2015	Swiss Webster x DBA/C57BL6	N	0	Y	22	One sex	N	N	N													0	22
247	The adipokine leptin mediates muscle- and liver-derived IGF-1 in aged mice.	/pubmed/26220769	create date:2015/07/30 | first author:Hamrick MW	2015	NA	N		N		One sex	N	N	Y															24
250	Cyclin Y Is Involved in the Regulation of Adipogenesis and Lipid Production.	/pubmed/26161966	create date:2015/07/15 | first author:An W	2015	C57BL/6	N	17	N	11	XXXXXXX	N	Y	N						Ccny-/- & WT							17	11
251	Cyclic AMP Mimics the Anti-ageing Effects of Calorie Restriction by Up-Regulating Sirtuin.	/pubmed/26153625	create date:2015/07/15 | first author:Wang Z	2015	BALB/c	Y	80	N	0	One sex	N	N	N													80	0
252	Influence of age-related learning and memory capacity of mice: different effects of a high and low caloric diet.	/pubmed/26138818	create date:2015/07/04 | first author:Dong W	2015	C57/BL6	Y	30	N	0	One sex	N	N	N													30	0
253	Effect of caloric restriction on the SIRT1/mTOR signaling pathways in senile mice.	/pubmed/26135885	create date:2015/07/03 | first author:Ma L	2015	C57BL/6	Y	36	N	0	One sex	N	N	N													36	0
255	Mice that are resistant to diet-induced weight loss have greater food anticipatory activity and altered melanocortin-3 receptor (MC3R) and dopamine receptor 2 (D2) gene expression.	/pubmed/26122292	create date:2015/07/01 | first author:Vaanholt LM	2015	MF1	N	30	N	34	XXXXXXX	N	Y	N													30	34
256	Deficiency in mTORC1-controlled C/EBP_-mRNA translation improves metabolic health in mice.	/pubmed/26113365	create date:2015/06/27 | first author:Zidek LM	2015	C57BL/6	Y		N		One sex	N	N	N						C/EBP__uOR
257	Cardioprotective Signature of Short-Term Caloric Restriction.	/pubmed/26098549	create date:2015/06/23 | first author:Noyan H	2015	C57Bl/6	Y		N	0	One sex	N	N	N														0
260	The effects of graded levels of calorie restriction: I. impact of short term calorie and protein restriction on body composition in the C57BL/6 mouse.	/pubmed/26079539	create date:2015/06/17 | first author:Mitchell SE	2015	C57/BL6	Y	49	N	0	One sex	N	N	N													49	0
261	The effects of graded levels of calorie restriction: II. Impact of short term calorie and protein restriction on circulating hormone levels, glucose homeostasis and oxidative stress in male C57BL/6 mice.	/pubmed/26061745	create date:2015/06/11 | first author:Mitchell SE	2015	C57/BL6	Y		N	0	One sex	N	N	N														0
263	Inhibition of Neuroblastoma Tumor Growth by Ketogenic Diet and/or Calorie Restriction in a CD1-Nu Mouse Model.	/pubmed/26053068	create date:2015/06/09 | first author:Morscher RJ	2015	CD-1	N	0	Y		One sex	N	N	N													0
264	Calorie restriction does not restore brain mitochondrial function in P301L tau mice, but it does decrease mitochondrial F0F1-ATPase activity.	/pubmed/26048366	create date:2015/06/07 | first author:Delic V	2015	FVB/129S	N		N		One sex	N	N	Y						Tg4510
265	Protein and Calorie Restriction Contribute Additively to Protection from Renal Ischemia Reperfusion Injury Partly via Leptin Reduction in Male Mice.	/pubmed/26041674	create date:2015/06/05 | first author:Robertson LT	2015	B6D2F1/J	Y		N	0	One sex	N	N	N						GCN2 KO								0
266	Dietary Protein to Carbohydrate Ratio and Caloric Restriction: Comparing Metabolic Outcomes in Mice.	/pubmed/26027933	create date:2015/06/02 | first author:Solon-Biet SM	2015	C57BL6/J	Y	90	N	0	One sex	N	N	N													90	0
267	Short-Term Caloric Restriction Suppresses Cardiac Oxidative Stress and Hypertrophy Caused by Chronic Pressure Overload.	/pubmed/25982824	create date:2015/05/20 | first author:Kobara M	2015	C57BL6	Y		N	0	One sex	N	N	N														0
268	Respiratory chain protein turnover rates in mice are highly heterogeneous but strikingly conserved across tissues, ages, and treatments.	/pubmed/25977255	create date:2015/05/16 | first author:Karunadharma PP	2015	C57BL/6	N	0	Y		One sex	N	N	N						Female mice were used, because the effects of RP in murine aging are much stronger in mice of that sex (20)							0
269	Caloric restriction induces heat shock response and inhibits B16F10 cell tumorigenesis both in vitro and in vivo.	/pubmed/25948793	create date:2015/05/08 | first author:Novelle MG	2015	C57BL/6	Y	20	N	0	One sex	N	N	N													20	0
270	Dietary restriction mitigates age-related accumulation of DNA damage, but not all changes in mouse corneal epithelium.	/pubmed/25937374	create date:2015/05/06 | first author:Hallam D	2015	C57BL/6	Y		N	0	One sex	N	N	N						TERT KO & WT								0
271	Upregulation of cytochrome c oxidase subunit 6b1 (Cox6b1) and formation of mitochondrial supercomplexes: implication of Cox6b1 in the effect of calorie restriction.	/pubmed/25929654	create date:2015/05/02 | first author:Kim SE	2015	C57BL/6 J	Y	12	N	0	One sex	N	N	N													12	0
272	Short-term food restriction followed by controlled refeeding promotes gorging behavior, enhances fat deposition, and diminishes insulin sensitivity in mice.	/pubmed/25913018	create date:2015/04/29 | first author:Kliewer KL	2015	BALB/c x DBA/2	Y	54	N	0	One sex	N	N	N													54	0
273	Metformin prevents aggressive ovarian cancer growth driven by high-energy diet: similarity with calorie restriction.	/pubmed/25895126	create date:2015/04/22 | first author:Al-Wahab Z	2015	C57B6	N	0	Y	50	One sex	N	N	N													0	50
276	A combination of probiotics and whey proteins enhances anti-obesity effects of calcium and dairy products during nutritional energy restriction in aP2-agouti transgenic mice.	/pubmed/25871498	create date:2015/04/15 | first author:Yoda K	2015	aP2-agouti	Y	45	N	0	One sex	N	N	N													45	0
278	A conserved transcriptional signature of delayed aging and reduced disease vulnerability is partially mediated by SIRT3.	/pubmed/25830335	create date:2015/04/02 | first author:Barger JL	2015	C57BL/6Hsd	Y	10	N	0	One sex	N	N	N						Sirt3-/-							10	0
279	Factors influencing individual variability in high fat diet-induced weight gain in out-bred MF1 mice.	/pubmed/25817538	create date:2015/03/31 | first author:Vaanholt LM	2015	MF1	N	59	N	65	XXXXXXX	N	Y	N													59	65
280	The life-extending effect of dietary restriction requires Foxo3 in mice.	/pubmed/25808402	create date:2015/03/27 | first author:Shimokawa I	2015	C57BL6	Y		N	0	One sex	N	N	N						Foxo3+/-, Foxo3-/-								0
281	Subacute calorie restriction and rapamycin discordantly alter mouse liver proteome homeostasis and reverse aging effects.	/pubmed/25807975	create date:2015/03/27 | first author:Karunadharma PP	2015	C57BL/6	N	0	Y		One sex	N	N	N						Female mice were used as a past study showed that the effects of RP in murine aging were larger in this gender							0
282	Caloric restriction and the adipokine leptin alter the SDF-1 signaling axis in bone marrow and in bone marrow derived mesenchymal stem cells.	/pubmed/25779533	create date:2015/03/18 | first author:Periyasamy-Thandavan S	2015	C57BL/6J	Y	6	N	0	One sex	N	N	N													6	0
283	Metformin and caloric restriction induce an AMPK-dependent restoration of mitochondrial dysfunction in fibroblasts from Fibromyalgia patients.	/pubmed/25779083	create date:2015/03/18 | first author:Alcocer-Gómez E	2015	C57/BL6/J	Y		N	0	One sex	N	N	N						Humans too								0
284	Neuropeptide Y stimulates autophagy in hypothalamic neurons.	/pubmed/25775546	create date:2015/03/17 | first author:Aveleira CA	2015	C57BL/6	Y		N		One sex	N	N	N
286	Ghrelin is required for dietary restriction-induced enhancement of hippocampal neurogenesis: lessons from ghrelin knockout mice.	/pubmed/25735661	create date:2015/03/05 | first author:Kim Y	2015	C57BL/6J	Y		N	0	One sex	N	N	N						Ghrelin KO & WT								0
287	Do altered energy metabolism or spontaneous locomotion 'mediate' decelerated senescence?	/pubmed/25720347	create date:2015/02/28 | first author:Arum O	2015	C57Bl/6J:C3HJ:BALB/c:129/Ola	N		N		XXXXXXX	Y	N	N						df/df & WT									136?
289	Impact of Longevity Interventions on a Validated Mouse Clinical Frailty Index.	/pubmed/25711530	create date:2015/02/26 | first author:Kane AE	2015	C57BL/6JJ, DBA/2J	N	34	N	40	XXXXXXX	N	Y	N													34	40
290	Lipidomic profiling of di- and tri-acylglycerol species in weight-controlled mice.	/pubmed/25706122	create date:2015/02/24 | first author:King BS	2015	CD-1	N	0	Y	45	One sex	N	N	N													0	45
291	Overexpression of the adiponectin gene mimics the metabolic and stress resistance effects of calorie restriction, but not the anti-tumor effect.	/pubmed/25698374	create date:2015/02/24 | first author:Kamohara R	2015	C57BL/6 N	Y		N		One sex	N	N	N						AdipoQ overexpressing & WT									37
292	Indispensable role of endothelial nitric oxide synthase in caloric restriction-induced cardioprotection against ischemia-reperfusion injury.	/pubmed/25681423	create date:2015/02/15 | first author:Shinmura K	2015	C57BL/6J	Y		N		One sex	N	N	N						eNOS-/- & WT
294	Genetic analysis of a murine QTL for diet restriction on chromosome 15.	/pubmed/25651884	create date:2015/02/06 | first author:Newell BL	2015	ILS, 5SA	N	26	N	37	XXXXXXX	N	Y	N						ILS.Lore5SA							26	37
295	Caloric restriction and intermittent fasting alter hepatic lipid droplet proteome and diacylglycerol species and prevent diabetes in NZO mice.	/pubmed/25645620	create date:2015/02/04 | first author:Baumeier C	2015	NZO/HIBomDife	Y	32	N	0	One sex	N	N	N													32	0
296	Dietary restriction protects against experimental cerebral malaria via leptin modulation and T-cell mTORC1 suppression.	/pubmed/25636003	create date:2015/01/31 | first author:Mejia P	2015	C57BL/6J	N	0	Y	8	One sex	N	N	N						ob/ob, db/db, WT							0	8
298	Reduced autophagy in livers of fasted, fat-depleted, ghrelin-deficient mice: reversal by growth hormone.	/pubmed/25583513	create date:2015/01/15 | first author:Zhang Y	2015	C57BL/6J	Y	16	N	0	One sex	N	N	N						Goat-/- & WT							16	0
299	Reduction of _-amyloid and _-secretase by calorie restriction in female Tg2576 mice.	/pubmed/25556162	create date:2015/01/04 | first author:Schafer MJ	2015	Swiss Webster _ DBA/C57BL6	N		Y		One sex	N	N	N						Tg2576
300	Endogenous hydrogen sulfide production is essential for dietary restriction benefits.	/pubmed/25542313	create date:2014/12/30 | first author:Hine C	2014	B6D2F1, 129/C57BL/6,	Y		N		One sex	N	N	N						LTsc1-/- & WT, CGL-/- & WT, NRF2-/- & WT
301	Effects of diet on adenosine monophosphate-activated protein kinase activity and disease progression in an amyotrophic lateral sclerosis model.	/pubmed/25534414	create date:2014/12/24 | first author:Zhao Z	2014	B6SJL-TgN(SOD1G93A)1Gur and B6SJL-TgN(SOD1)2Gur	Y	84	N	0	One sex	N	N	N						SOD1 mutatnt & WT							84	0
302	A weekly alternating diet between caloric restriction and medium fat protects the liver from fatty liver development in middle-aged C57BL/6J mice.	/pubmed/25504628	create date:2014/12/17 | first author:Rusli F	2014	C57BL/6J	Y	448	N	0	One sex	N	N	N													448	0
303	Dietary restriction preserves the mass and function of pancreatic _ cells via cell kinetic regulation and suppression of oxidative/ER stress in diabetic mice.	/pubmed/25488546	create date:2014/12/10 | first author:Kanda Y	2014	BKS.Cg/Jcl	Y	15	N	0	One sex	N	N	N						db/db, db/m							15	0
308	Calorie Restriction Prevents Metabolic Aging Caused by Abnormal SIRT1 Function in Adipose Tissues.	/pubmed/25475438	create date:2014/12/06 | first author:Xu C	2014	C57BL/6 _ CBA	Y		N	0	One sex	N	N	N						Adipo-SIRT1, Adipo-H363Y								0
310	Calorie restriction increases lipopolysaccharide-induced neuropeptide Y immunolabeling and reduces microglial cell area in the arcuate hypothalamic nucleus.	/pubmed/25446356	create date:2014/12/03 | first author:Radler ME	2014	C57BL/6J	Y	29	N	0	One sex	N	N	N													29	0
312	Lifespan-extending caloric restriction or mTOR inhibition impair adaptive immunity of old mice by distinct mechanisms.	/pubmed/25424641	create date:2014/11/27 | first author:Goldberg EL	2014	C57BL/6	Y		N	0	One sex	N	N	N														0
313	Muscle-Specific Overexpression of PGC-1_ Does Not Augment Metabolic Improvements in Response to Exercise and Caloric Restriction.	/pubmed/25422105	create date:2014/11/26 | first author:Wong KE	2014	NA	Y		N	0	One sex	N	N	N														0
314	The effect of calorie restriction on insulin signaling in skeletal muscle and adipose tissue of Ames dwarf mice.	/pubmed/25411241	create date:2014/11/21 | first author:Wiesenborn DS	2014	C57BL/6 _ C3H	Y	40	N	0	One sex	N	N	N						df/df & WT							40	0
315	Fibroblast growth factor 21 is not required for the reductions in circulating insulin-like growth factor-1 or global cell proliferation rates in response to moderate calorie restriction in adult mice.	/pubmed/25369265	create date:2014/11/05 | first author:Thompson AC	2014	C57BL/6, C57BL/6NTac	Y		N	0	One sex	N	N	N						FGF21-KO & WT								0
316	Adiposity induces lethal cytokine storm after systemic administration of stimulatory immunotherapy regimens in aged mice.	/pubmed/25366964	create date:2014/11/05 | first author:Mirsoian A	2014	C57BL/6	N	0	Y		One sex	N	N	N						B6.Cg-Lepob/ob & WT							0
318	The number of cardiac myocytes in the hypertrophic and hypotrophic left ventricle of the obese and calorie-restricted mouse heart.	/pubmed/25322944	create date:2014/10/18 | first author:Schipke J	2014	C57Bl6/N	Y	20	N	0	One sex	N	N	N													20	0
319	The Influence of Dietary Fat Source on Life Span in Calorie Restricted Mice.	/pubmed/25313149	create date:2014/10/15 | first author:López-Domínguez JA	2014	C57BL/6J	Y	147	N	0	One sex	N	N	N													147	0
320	Reduced signaling of PI3K-Akt and RAS-MAPK pathways is the key target for weight-loss-induced cancer prevention by dietary calorie restriction and/or physical activity.	/pubmed/25283328	create date:2014/10/07 | first author:Standard J	2014	SENCAR	N	0	Y		One sex	N	N	N													0
321	Propranolol attenuates calorie restriction- and high calorie diet-induced bone marrow adiposity.	/pubmed/25248563	create date:2014/09/25 | first author:Baek K	2014	C57BL/6	N		N		One sex	N	N	Y															16
322	Dopamine receptor 1 neurons in the dorsal striatum regulate food anticipatory circadian activity rhythms in mice.	/pubmed/25217530	create date:2014/09/14 | first author:Gallardo CM	2014	C57BL/6J	Y	54	N	0	One sex	N	N	N						female mice do not anticipate scheduled palatable meals robustly', D1rKO & WT, D2R KO & WT,							54	0
323	Reduced glucose utilization underlies seizure protection with dietary therapy in epileptic EL mice.	/pubmed/25200525	create date:2014/09/10 | first author:Meidenbauer JJ	2014	pilepsy-prone EL mice	N	0	Y		One sex	N	N	N						Females were used for these studies, as adult males die sporadically with age from acute uremia poisoning due to urinary blockage and retention'							0
324	ATF4 activity: a common feature shared by many kinds of slow-aging mice.	/pubmed/25156122	create date:2014/08/27 | first author:Li W	2014	CB6F1 x C3D2F1	N		N		XXXXXXX	N	Y	N						UM_HET3, CL12
325	Growth hormone abolishes beneficial effects of calorie restriction in long-lived Ames dwarf mice.	/pubmed/25152388	create date:2014/08/26 | first author:Gesing A	2014	C57BL/6 _ C3H	Y	80	N	0	One sex	N	N	N						df/df & WT							80	0
327	Cardiolipin profiles as a potential biomarker of mitochondrial health in diet-induced obese mice subjected to exercise, diet-restriction and ephedrine treatment.	/pubmed/25132005	create date:2014/08/19 | first author:Faber C	2014	C57Bl/6NTac	Y	24	N	0	One sex	N	N	N													24	0
330	Voluntary exercise under a food restriction condition decreases blood branched-chain amino acid levels, in addition to improvement of glucose and lipid metabolism, in db mice, animal model of type 2 diabetes.	/pubmed/25085431	create date:2014/08/03 | first author:Marchianti AC	2014	C57BLKS(BKS).Cg	Y	26	N	0	One sex	N	N	N						Leprdb/+ Leprdb/J; db, BKS.Cg-Dock7 m +/Dock7 m +/J, & WT							26	0
331	Short-term rapamycin treatment in mice has few effects on the transcriptome of white adipose tissue compared to dietary restriction.	/pubmed/25075714	create date:2014/07/31 | first author:Fok WC	2014	C57BL/6	Y	24	N	0	One sex	N	N	N						Transcriptomics							24	0
333	Caloric restriction reveals a metabolomic and lipidomic signature in liver of male mice.	/pubmed/25052291	create date:2014/07/24 | first author:Jové M	2014	C57BL/6	Y		N	0	One sex	N	N	N														0
334	Dietary restriction ameliorates haematopoietic ageing independent of telomerase, whilst lack of telomerase and short telomeres exacerbates the ageing phenotype.	/pubmed/25038516	create date:2014/07/20 | first author:Al-Ajmi N	2014	B6.129S-Tert, tm1Yjc/J, B6.Cg-Terc, tm1Rdp/J	Y	17	N	0	One sex	N	N	N													17	0
336	Bone marrow adipose tissue is an endocrine organ that contributes to increased circulating adiponectin during caloric restriction.	/pubmed/24998914	create date:2014/07/08 | first author:Cawthorn WP	2014	C57BL/6J	N	21	N	0	XXXXXXX	N	Y	N						Ocn-Wnt10b							21	0
337	Positive effects of prolonged caloric restriction on the population of very small embryonic-like stem cells - hematopoietic and ovarian implications.	/pubmed/24987461	create date:2014/07/06 | first author:Grymula K	2014	C57Bl/6	N	12	N	12	XXXXXXX	N	Y	N													12	12
338	Life-long caloric restriction does not alter the severity of age-related osteoarthritis.	/pubmed/24981112	create date:2014/07/02 | first author:McNeill JN	2014	C57BL/NIA	Y	17	N	0	One sex	N	N	N													17	0
339	Impairment of autophagy in endothelial cells prevents shear-stress-induced increases in nitric oxide bioavailability.	/pubmed/24941409	create date:2014/06/19 | first author:Bharath LP	2014	C57BL/6	N		N		XXXXXXX	Y	N	N
341	Partial rescue of memory deficits induced by calorie restriction in a mouse model of tau deposition.	/pubmed/24925454	create date:2014/06/14 | first author:Brownlow ML	2014	FVB/129S	N	385	N	427	XXXXXXX	Y	N	N						Tg4510 & WT							385	427
342	Nicotinamide mononucleotide, an intermediate of NAD+ synthesis, protects the heart from ischemia and reperfusion.	/pubmed/24905194	create date:2014/06/07 | first author:Yamamoto T	2014	C57BL/6J	Y		N	0	One sex	N	N	N						Sirt1 KO, Nampt+/-, cardiac expression of mRFP-GFP-LC								0
343	The metastatic potential of triple-negative breast cancer is decreased via caloric restriction-mediated reduction of the miR-17~92 cluster.	/pubmed/24863696	create date:2014/05/28 | first author:Jin L	2014	Balb/c	N	0	Y	14	One sex	N	N	N													0	14
344	Induced ablation of ghrelin cells in adult mice does not decrease food intake, body weight, or response to high-fat diet.	/pubmed/24836560	create date:2014/05/20 | first author:McFarlane MR	2014	C57BL/6J	Y		N	0	One sex	N	N	N						Ghrl-DTR & WT								0
346	Behavioral and neural correlates of acute and scheduled hunger in C57BL/6 mice.	/pubmed/24806659	create date:2014/05/09 | first author:Gallardo CM	2014	C57BL/6J	Y	28	N	0	One sex	N	N	N													28	0
347	Calorie restriction decreases murine and human pancreatic tumor cell growth, nuclear factor-_B activation, and inflammation-related gene expression in an insulin-like growth factor-1-dependent manner.	/pubmed/24804677	create date:2014/05/09 | first author:Harvey AE	2014	C57/BL6	Y	30	N	0	One sex	N	N	N													30	0
348	Inhibition of AMPK accentuates prolonged caloric restriction-induced change in cardiac contractile function through disruption of compensatory autophagy.	/pubmed/24793415	create date:2014/05/06 | first author:Zheng Q	2014	C57BL/6J	Y	32	N	0	One sex	N	N	N						AMPKa2 overexpressing & WT							32	0
350	Rapamycin and dietary restriction induce metabolically distinctive changes in mouse liver.	/pubmed/24755936	create date:2014/04/24 | first author:Yu Z	2014	C57BL/6	Y	36	N	0	One sex	N	N	N													36	0
352	The P7C3 class of neuroprotective compounds exerts antidepressant efficacy in mice by increasing hippocampal neurogenesis.	/pubmed/24751964	create date:2014/04/23 | first author:Walker AK	2014	C57/BL/6J	Y	64	N	0	One sex	N	N	N						Ghsr-/- & WT							64	0
353	Effects of calorie restriction and diet-induced obesity on murine colon carcinogenesis, growth and inflammatory factors, and microRNA expression.	/pubmed/24732966	create date:2014/04/16 | first author:Olivo-Marston SE	2014	FVB	Y	132	N	0	One sex	N	N	N													132	0
354	Mitochondrial ultrastructure and markers of dynamics in hepatocytes from aged, calorie restricted mice fed with different dietary fats.	/pubmed/24704714	create date:2014/04/08 | first author:Khraiwesh H	2014	C57BL/6	Y		N	0	One sex	N	N	N														0
355	Dietary fat and aging modulate apoptotic signaling in liver of calorie-restricted mice.	/pubmed/24691092	create date:2014/04/03 | first author:López-Domínguez JA	2014	C57BL/6J	Y	16	N	0	One sex	N	N	N													16	0
356	Caloric restriction maintains OX40 agonist-mediated tumor immunity and CD4 T cell priming during aging.	/pubmed/24682539	create date:2014/04/01 | first author:Farazi M	2014	Balb/c, C57BL/6	N		Y		One sex	N	N	N
357	A key role for neuropeptide Y in lifespan extension and cancer suppression via dietary restriction.	/pubmed/24682105	create date:2014/04/01 | first author:Chiba T	2014	129S6/SvEvTac	N	69	N	70	XXXXXXX	N	Y	N						Npy-/- & WT							69	70
358	Caloric restriction can improve learning ability in C57/BL mice via regulation of the insulin-PI3K/Akt signaling pathway.	/pubmed/24651932	create date:2014/03/22 | first author:Ma L	2014	C57/BL	Y	30	N	0	One sex	N	N	N													30	0
359	Altered proteome turnover and remodeling by short-term caloric restriction or rapamycin rejuvenate the aging heart.	/pubmed/24612461	create date:2014/03/13 | first author:Dai DF	2014	C57BL/6	N	0	Y	45	One sex	N	N	N													0	45
360	Regulation of NR4A by nutritional status, gender, postnatal development and hormonal deficiency.	/pubmed/24584059	create date:2014/03/04 | first author:Pérez-Sieira S	2014	C57BL6J	Y		N		One sex	N	N	N						ob/ob & WT
361	The AMPK-SIRT signaling network regulates glucose tolerance under calorie restriction conditions.	/pubmed/24530742	create date:2014/02/18 | first author:Silvestre MF	2014	NA	N	0	Y	68	One sex	N	N	N						Skeletal muscle specific AMPK-/- & WT							0	68
362	mTOR and autophagy in normal brain aging and caloric restriction ameliorating age-related cognition deficits.	/pubmed/24525424	create date:2014/02/15 | first author:Yang F	2014	C57BL/6J	Y	75	N	0	One sex	N	N	N													75	0
363	Dietary restriction and fasting arrest B and T cell development and increase mature B and T cell numbers in bone marrow.	/pubmed/24504160	create date:2014/02/08 | first author:Shushimita S	2014	C57Bl/6	Y	24	N	0	One sex	N	N	N													24	0
365	Cancer prevention by adult-onset calorie restriction after infant exposure to ionizing radiation in B6C3F1 male mice.	/pubmed/24482070	create date:2014/02/01 | first author:Shang Y	2014	B6C3F1/Crlj	Y	183	N	0	One sex	N	N	N													183	0
367	[Protective effects of caloric restriction on ovarian function].	/pubmed/24406130	create date:2014/01/11 | first author:Shi LY	2014	C57BL/6	N	0	Y	30	One sex	N	N	N													0	30
370	Akt2 knockout alleviates prolonged caloric restriction-induced change in cardiac contractile function through regulation of autophagy.	/pubmed/24368095	create date:2013/12/26 | first author:Zhang Y	2013	C57BL/6	Y		N	0	One sex	N	N	N						Akt2-/- & WT								0
371	Rapamycin-mediated lifespan increase in mice is dose and sex dependent and metabolically distinct from dietary restriction.	/pubmed/24341993	create date:2013/12/18 | first author:Miller RA	2013	CByB6F1/J x C3D2F1/J	N		N		XXXXXXX	N	Y	N						Reports sex difference
373	Late-onset dietary restriction modulates protein carbonylation and catalase in cerebral hemispheres of aged mice.	/pubmed/24338129	create date:2013/12/18 | first author:Dkhar P	2013	BALB/c	N	0	Y	16	One sex	N	N	N													0	16
375	The influence of Shc proteins on life span in mice.	/pubmed/24336818	create date:2013/12/18 | first author:Ramsey JJ	2013	C57BL/6J; 129Sv, C57BL/6J x 129Sv	N		N		XXXXXXX	N	Y	N						Shc-KO
377	Effects of a novel MC4R agonist on maintenance of reduced body weight in diet-induced obese mice.	/pubmed/24318934	create date:2013/12/10 | first author:Skowronski AA	2013	C57BL/6J	Y	80	N	0	One sex	N	N	N													80	0
378	Combined treatment of rapamycin and dietary restriction has a larger effect on the transcriptome and metabolome of liver.	/pubmed/24304444	create date:2013/12/07 | first author:Fok WC	2013	C57/BL6	Y	36	N	0	One sex	N	N	N						Transcriptomics							36	0
379	Weight cycling promotes fat gain and altered clock gene expression in adipose tissue in C57BL/6J mice.	/pubmed/24302006	create date:2013/12/05 | first author:Dankel SN	2013	C57BL/6J BomTac	Y	27	N	0	One sex	N	N	N													27	0
380	Calorie restriction attenuates lipopolysaccharide (LPS)-induced microglial activation in discrete regions of the hypothalamus and the subfornical organ.	/pubmed/24291211	create date:2013/12/03 | first author:Radler ME	2013	C57BL/6J	Y	31	N	0	One sex	N	N	N													31	0
381	Energy metabolism and biochemical features of adipose tissues in ICR mice after long-term calorie-restricted diet.	/pubmed/24288756	create date:2013/11/30 | first author:Mizonova OV	2013	ICR	Y	58	N	0	One sex	N	N	N													58	0
382	Resolvin D1 primes the resolution process initiated by calorie restriction in obesity-induced steatohepatitis.	/pubmed/24249635	create date:2013/11/20 | first author:Rius B	2013	C57BL/6J	Y	37	N	0	One sex	N	N	N													37	0
383	Short-term calorie restriction feminizes the mRNA profiles of drug metabolizing enzymes and transporters in livers of mice.	/pubmed/24240088	create date:2013/11/19 | first author:Fu ZD	2013	C57BL/6	Y	20	N	0	One sex	N	N	N													20	0
384	NO-dependent endothelial dysfunction in type II diabetes is aggravated by dyslipidemia and hypertension, but can be restored by angiotensin-converting enzyme inhibition and weight loss.	/pubmed/24192582	create date:2013/11/07 | first author:Nevelsteen I	2013	C57BL/6J	N		N		XXXXXXX	Y	N	N						LDLR-/-, ob/ob; male & female analysed, no difference so combined									43
385	Increased bile acids in enterohepatic circulation by short-term calorie restriction in male mice.	/pubmed/24183703	create date:2013/11/05 | first author:Fu ZD	2013	C57BL/6	Y	20	N	0	One sex	N	N	N						The majority of previous reports about CR have used male mice. Limited information is available on CR female mice, providing little evidence for design of percentages of CR that produce beneficial effects. Female mice have lower body weight compared to their age-matched male counterparts, and thus have varied ability to sustain CR. This leads to the technical difficulty of using female mice in a …							20	0
386	The influence of dietary lipid composition on skeletal muscle mitochondria from mice following eight months of calorie restriction.	/pubmed/24182343	create date:2013/11/05 | first author:Chen Y	2013	C57BL/6	Y	46	N	0	One sex	N	N	N													46	0
387	Growth hormone-releasing hormone disruption extends lifespan and regulates response to caloric restriction in mice.	/pubmed/24175087	create date:2013/11/01 | first author:Sun LY	2013	C57BL6 x 129SV	N	95	N	110	XXXXXXX	N	Y	N						GHRH-KO							95	110
388	Prevention of neuromusculoskeletal frailty in slow-aging ames dwarf mice: longitudinal investigation of interaction of longevity genes and caloric restriction.	/pubmed/24155868	create date:2013/10/25 | first author:Arum O	2013	C57BL/6 _ C3H	N	61	N	73	XXXXXXX	N	Y	N						Prop1df/df & hets							61	73
389	Lifelong caloric restriction reprograms hepatic fat metabolism in mice.	/pubmed/24149425	create date:2013/10/24 | first author:Kuhla A	2013	C57BL/6	N	0	Y	60	One sex	N	N	N													0	60
391	Calorie restriction influences key metabolic enzyme activities and markers of oxidative damage in distinct mouse liver mitochondrial sub-populations.	/pubmed/24140885	create date:2013/10/22 | first author:Hagopian K	2013	C57BL/6J	Y	12	N	0	One sex	N	N	N													12	0
393	Beneficial effects of lifelong caloric restriction on endothelial function are greater in conduit arteries compared to cerebral resistance arteries.	/pubmed/24065292	create date:2013/09/26 | first author:Walker AE	2013	B6D2F1	Y		N	0	One sex	N	N	N														0
394	Calorie restriction down-regulates expression of the iron regulatory hormone hepcidin in normal and D-galactose-induced aging mouse brain.	/pubmed/24044515	create date:2013/09/21 | first author:Wei S	2013	C57BL/6	N	0	Y	32	One sex	N	N	N													0	32
396	Dietary energy balance modulation of Kras- and Ink4a/Arf+/--driven pancreatic cancer: the role of insulin-like growth factor-I.	/pubmed/23980075	create date:2013/08/28 | first author:Lashinger LM	2013	FVB/n	Y	124	N	0	One sex	N	N	N						Kras Ink4a+/-							124	0
397	Caloric restriction modulates Mcl-1 expression and sensitizes lymphomas to BH3 mimetic in mice.	/pubmed/23966420	create date:2013/08/24 | first author:Meynet O	2013	B6.Cg-Tg(IghMyc)22Bri/J	N		N		One sex	N	N	Y						Eµ-Myc/wild-type (WT)
398	Molecular signatures of mammalian hibernation: comparisons with alternative phenotypes.	/pubmed/23957789	create date:2013/08/21 | first author:Xu Y	2013	Ames, B6C3F1, C57BL6	Could not see clear evidence of CR in mice in vivo	Could not see clear evidence of CR in mice in vivo	Could not see clear evidence of CR in mice in vivo	Could not see clear evidence of CR in mice in vivo	XXXXXXX	Could not see clear evidence of CR in mice in vivo	Could not see clear evidence of CR in mice in vivo	Could not see clear evidence of CR in mice in vivo	Could not see clear evidence of CR in mice in vivo	Could not see clear evidence of CR in mice in vivo	Could not see clear evidence of CR in mice in vivo	Could not see clear evidence of CR in mice in vivo	Could not see clear evidence of CR in mice in vivo	Could not see clear evidence of CR in mice in vivo	Could not see clear evidence of CR in mice in vivo	Could not see clear evidence of CR in mice in vivo	Could not see clear evidence of CR in mice in vivo	Could not see clear evidence of CR in mice in vivo	Could not see clear evidence of CR in mice in vivo	Could not see clear evidence of CR in mice in vivo	Could not see clear evidence of CR in mice in vivo	Could not see clear evidence of CR in mice in vivo	Could not see clear evidence of CR in mice in vivo
399	Effect of caloric restriction and AMPK activation on hepatic nuclear receptor, biotransformation enzyme, and transporter expression in lean and obese mice.	/pubmed/23949303	create date:2013/08/21 | first author:Kulkarni SR	2013	C57BL/6	Y	34	N	0	One sex	N	N	N						Lepob/ob & WT							34	0
400	SIRT1 but not its increased expression is essential for lifespan extension in caloric-restricted mice.	/pubmed/23941528	create date:2013/08/15 | first author:Mercken EM	2013	CD1	N		N		XXXXXXX	Y	N	N						SIRT1+/+, SIRT1+/- and SIRT1-/-									18
402	Peripheral reduction of FGFR4 with antisense oligonucleotides increases metabolic rate and lowers adiposity in diet-induced obese mice.	/pubmed/23922646	create date:2013/08/08 | first author:Yu XX	2013	C57BL/6J	Y		N	0	One sex	N	N	N														0
403	Metformin improves healthspan and lifespan in mice.	/pubmed/23900241	create date:2013/08/01 | first author:Martin-Montalvo A	2013	C57BL/6, B6C3F1	Y	658	N	0	One sex	N	N	N													658	0
404	Overnutrition stimulates intestinal epithelium proliferation through _-catenin signaling in obese mice.	/pubmed/23884889	create date:2013/07/26 | first author:Mao J	2013	C57BL/6	Y	49	N		One sex	N	N	N						db/db							49
405	Caloric restriction-mediated induction of lipid metabolism gene expression in liver is enhanced by Keap1-knockdown.	/pubmed/23884569	create date:2013/07/26 | first author:Kulkarni SR	2013	C57BL/6	Y	22	N	0	One sex	N	N	N						Keap-1KD							22	0
406	HMB attenuates muscle loss during sustained energy deficit induced by calorie restriction and endurance exercise.	/pubmed/23876188	create date:2013/07/24 | first author:Park BS	2013	C57BL/6	Y	61	N	0	One sex	N	N	N													61	0
407	Lifelong caloric restriction increases working memory in mice.	/pubmed/23874758	create date:2013/07/23 | first author:Kuhla A	2013	C57BL/6	N	0	Y	70	One sex	N	N	N													0	70
409	Structural modulation of gut microbiota in life-long calorie-restricted mice.	/pubmed/23860099	create date:2013/07/19 | first author:Zhang C	2013	C57BL/6 J	Y	180	N	0	One sex	N	N	N													180	0
410	Metabolic alterations due to caloric restriction and every other day feeding in normal and growth hormone receptor knockout mice.	/pubmed/23833202	create date:2013/07/09 | first author:Westbrook R	2013	C57BL6 x 129SV	N		N	0	One sex	N	N	Y						GHRKO & +/-								0
411	Metabolic adaptations to short-term every-other-day feeding in long-living Ames dwarf mice.	/pubmed/23832075	create date:2013/07/09 | first author:Brown-Borg HM	2013	C57BL/6 _ C3H	N		N		XXXXXXX	Y	N	N						df/df & WT									68
413	Calorie restriction delays the progression of lesions to pancreatic cancer in the LSL-KrasG12D; Pdx-1/Cre mouse model of pancreatic cancer.	/pubmed/23828595	create date:2013/07/06 | first author:Lanza-Jacoby S	2013	LSL-KrasG12D; Pdx-1/Cre	N		N		XXXXXXX	Y	N	N						LSL-KrasG12D; Pdx-1/Cre									93
414	The slow-aging growth hormone receptor/binding protein gene-disrupted (GHR-KO) mouse is protected from aging-resultant neuromusculoskeletal frailty.	/pubmed/23824747	create date:2013/07/05 | first author:Arum O	2013	C57BL6 x 129SV	N	63	N	66	XXXXXXX	N	Y	N						GHRKO & +/-							63	66
415	Effects of calorie restriction and IGF-1 receptor blockade on the progression of 22Rv1 prostate cancer xenografts.	/pubmed/23823800	create date:2013/07/05 | first author:Galet C	2013	SCID	Y	65	N	0	One sex	N	N	N													65	0
417	Calorie restriction alleviates the age-related decrease in neural progenitor cell division in the aging brain.	/pubmed/23773068	create date:2013/06/19 | first author:Park JH	2013	C57BL/6	N	42	N	40	XXXXXXX	N	Y	N						Nestin-GFP							42	40
418	Chronic caloric restriction and exercise improve metabolic conditions of dietary-induced obese mice in autophagy correlated manner without involving AMPK.	/pubmed/23762877	create date:2013/06/14 | first author:Cui M	2013	C57	Y		N	0	One sex	N	N	N														0
420	Pten-null tumors cohabiting the same lung display differential AKT activation and sensitivity to dietary restriction.	/pubmed/23719831	create date:2013/05/31 | first author:Curry NL	2013	129 svJae	Y		N	0	One sex	N	N	N						KPTENp53								0
421	Life-long caloric restriction reduces oxidative stress and preserves nitric oxide bioavailability and function in arteries of old mice.	/pubmed/23714110	create date:2013/05/30 | first author:Donato AJ	2013	B6D2F1	Y	104	N	0	One sex	N	N	N													104	0
422	Caloric restriction augments radiation efficacy in breast cancer.	/pubmed/23708519	create date:2013/05/28 | first author:Saleh AD	2013	Balb/c	N	0	Y	80	One sex	N	N	N													0	80
423	Caloric restriction reduces edema and prolongs survival in a mouse glioma model.	/pubmed/23703297	create date:2013/05/25 | first author:Jiang YS	2013	Athymic	Y	60	N	0	One sex	N	N	N													60	0
424	A dietary regimen of caloric restriction or pharmacological activation of SIRT1 to delay the onset of neurodegeneration.	/pubmed/23699506	create date:2013/05/24 | first author:Gräff J	2013	C57BL/6J	N		N		XXXXXXX	Y	N	N						CK-p25
426	5' tRNA halves are present as abundant complexes in serum, concentrated in blood cells, and modulated by aging and calorie restriction.	/pubmed/23638709	create date:2013/05/04 | first author:Dhahbi JM	2013	B6C3F1	Y		N	0	One sex	N	N	N														0
429	Exercise and caloric restriction alter the immune system of mice submitted to a high-fat diet.	/pubmed/23576853	create date:2013/04/12 | first author:Wasinski F	2013	C57BL/6	Y	20	N	0	One sex	N	N	N													20	0
432	Hunger in the absence of caloric restriction improves cognition and attenuates Alzheimer's disease pathology in a mouse model.	/pubmed/23565247	create date:2013/04/09 | first author:Dhurandhar EJ	2013	C57BL/6	Y	36	N	0	One sex	N	N	N						APPSwDI							36	0
433	Beneficial effects of a 6-month dietary restriction are time-dependently abolished within 2 weeks or 6 months of refeeding-genome-wide transcriptome analysis in mouse liver.	/pubmed/23563226	create date:2013/04/09 | first author:Giller K	2013	C57BL/6	Y	50	N	0	One sex	N	N	N													50	0
434	Combination of intermittent calorie restriction and eicosapentaenoic acid for inhibition of mammary tumors.	/pubmed/23550153	create date:2013/04/04 | first author:Mizuno NK	2013	FVB/N-Tg(MMTVneu)202Mul/J	N	0	Y	178	One sex	N	N	N						MMTV-Her2/neu							0	178
435	AMP activated protein kinase is indispensable for myocardial adaptation to caloric restriction in mice.	/pubmed/23527250	create date:2013/03/26 | first author:Chen K	2013	C57B/6J	Y	12	N	0	One sex	N	N	N						AMPK_2 KO & WT							12	0
436	Differential pre-mRNA splicing regulates Nnat isoforms in the hypothalamus after gastric bypass surgery in mice.	/pubmed/23527188	create date:2013/03/26 | first author:Scott WR	2013	C57BL/6	Y	151	N	0	One sex	N	N	N													151	0
437	Defective regulation of adipose tissue autophagy in obesity.	/pubmed/23478428	create date:2013/03/13 | first author:Nuñez CE	2013	Swiss	Y	6	N	0	One sex	N	N	N						Humans too							6	0
438	Deep sequencing identifies circulating mouse miRNAs that are functionally implicated in manifestations of aging and responsive to calorie restriction.	/pubmed/23470454	create date:2013/03/09 | first author:Dhahbi JM	2013	B6C3F1	Y		N	0	One sex	N	N	N														0
439	Beneficial cardiac effects of caloric restriction are lost with age in a murine model of obesity.	/pubmed/23456569	create date:2013/03/05 | first author:AlGhatrif M	2013	C57BL/6J	N		N	0	One sex	N	N	Y						ob/ob & WT								0
440	Short-term calorie and protein restriction provide partial protection from chemotoxicity but do not delay glioma progression.	/pubmed/23454633	create date:2013/03/05 | first author:Brandhorst S	2013	CD-1, BalB/C or C57BL/6N	N	0	Y	30	One sex	N	N	N													0	30
441	The protective effect of intermittent calorie restriction on mammary tumorigenesis is not compromised by consumption of a high fat diet during refeeding.	/pubmed/23446811	create date:2013/03/01 | first author:Rogozina OP	2013	NA	N	0	Y	90	One sex	N	N	N						MMTV-TGF-_							0	90
442	Major urinary protein 5, a scent communication protein, is regulated by dietary restriction and subsequent re-feeding in mice.	/pubmed/23446533	create date:2013/03/01 | first author:Giller K	2013	C57BL6	Y	33	N	0	One sex	N	N	N													33	0
443	Involvement of arterial baroreflex in the protective effect of dietary restriction against stroke.	/pubmed/23443169	create date:2013/02/28 | first author:Liu AJ	2013		Y	66	N	0	One sex	N	N	N						Sirt1KO & WT							66	0
445	UCP2 regulates the glucagon response to fasting and starvation.	/pubmed/23434936	create date:2013/02/26 | first author:Allister EM	2013	C57BL/6 x 129/SV	Y	3	N	0	One sex	N	N	N						_-cell–specific UCP2 deletion and expression of eYFP UCP2AKO-YFP							3	0
446	Angiotensin-converting enzyme inhibition and food restriction restore delayed preconditioning in diabetic mice.	/pubmed/23432808	create date:2013/02/26 | first author:Van der Mieren G	2013	C57BL/6J	N		N		One sex	N	N	Y						ob/ob, Ldl-/-, WT									129
448	Effect of chronic unpredictable stress on short term dietary restriction and its modulation by multivitamin-mineral supplementation.	/pubmed/23415982	create date:2013/02/19 | first author:Hasan S	2013	Swiss	Y	80	N	0	One sex	N	N	N													80	0
449	Alterations of ultrastructural and fission/fusion markers in hepatocyte mitochondria from mice following calorie restriction with different dietary fats.	/pubmed/23403066	create date:2013/02/14 | first author:Khraiwesh H	2013	C57BL/6	Y	64	N	0	One sex	N	N	N													64	0
451	Telomerase reverse transcriptase synergizes with calorie restriction to increase health span and extend mouse longevity.	/pubmed/23349740	create date:2013/01/26 | first author:Vera E	2013	C57BL/6	Y	76	N	0	One sex	N	N	N													76	0
453	Dose-dependent effects of calorie restriction on gene expression, metabolism, and tumor progression are partially mediated by insulin-like growth factor-1.	/pubmed/23342276	create date:2013/01/24 | first author:Nogueira LM	2013	C57BL/6NCr	N	0	Y	30	One sex	N	N	N													0	30
454	Calorie-restricted weight loss reverses high-fat diet-induced ghrelin resistance, which contributes to rebound weight gain in a ghrelin-dependent manner.	/pubmed/23307790	create date:2013/01/12 | first author:Briggs DI	2013	C57BL6	Y	54	N	0	One sex	N	N	N													54	0
455	Caloric restriction enhances fear extinction learning in mice.	/pubmed/23303073	create date:2013/01/11 | first author:Riddle MC	2013	C57BL/6	N		N		XXXXXXX	N	Y	N						B6.129(Cg)-Slc6a4tm1Kpl/J & WT
456	Regulation of TNF_ converting enzyme activity in visceral adipose tissue of obese mice.	/pubmed/23274494	create date:2013/01/01 | first author:Kawasaki S	2013	C57BL/6J	Y	36	N	0	One sex	N	N	N						KK, KK-AY							36	0
458	NK cell maturation and function in C57BL/6 mice are altered by caloric restriction.	/pubmed/23241894	create date:2012/12/18 | first author:Clinthorne JF	2012	C57BL/6	Y		N	0	One sex	N	N	N														0
460	Suppression of oxidative stress by _-hydroxybutyrate, an endogenous histone deacetylase inhibitor.	/pubmed/23223453	create date:2012/12/12 | first author:Shimazu T	2012	C57Bl6J	Y		N		One sex	N	N	N
462	Chronic caloric restriction preserves mitochondrial function in senescence without increasing mitochondrial biogenesis.	/pubmed/23217257	create date:2012/12/12 | first author:Lanza IR	2012	B6D2F1	Y		N		One sex	N	N	N
463	Calorie restriction and SIRT3 trigger global reprogramming of the mitochondrial protein acetylome.	/pubmed/23201123	create date:2012/12/04 | first author:Hebert AS	2012	C57BL/6J	N		N		XXXXXXX	Y	N	N						Sirt3-/-									12
464	Dietary fat modifies mitochondrial and plasma membrane apoptotic signaling in skeletal muscle of calorie-restricted mice.	/pubmed/23179253	create date:2012/11/28 | first author:López-Domínguez JA	2012	C57BL/6	Y	64	N	0	One sex	N	N	N													64	0
465	IGF1 dependence of dietary energy balance effects on murine Met1 mammary tumor progression, epithelial-to-mesenchymal transition, and chemokine expression.	/pubmed/23152442	create date:2012/11/16 | first author:Ford NA	2012	FVB/N	N	0	Y	30	One sex	N	N	N						IGF1-/- & WT							0	30
467	Food restriction reverses the hyper-muscular phenotype and force generation capacity deficit of the myostatin null mouse.	/pubmed/23143700	create date:2012/11/13 | first author:Matsakas A	2012	C57BL/6	Y	18	N	0	One sex	N	N	N						MSTN-/- & WT							18	0
469	Calorie restriction does not increase short-term or long-term protein synthesis.	/pubmed/23105041	create date:2012/10/30 | first author:Miller BF	2012	B6D2F1	Y		N		One sex	N	N	N
471	The influence of dietary lipid composition on liver mitochondria from mice following 1 month of calorie restriction.	/pubmed/23098316	create date:2012/10/27 | first author:Chen Y	2012	C57BL/6	Y		N	0	One sex	N	N	N														0
472	Beta-lapachone, a modulator of NAD metabolism, prevents health declines in aged mice.	/pubmed/23071729	create date:2012/10/17 | first author:Lee JS	2012	C57BL/6	Y		N		One sex	N	N	N
473	The starvation hormone, fibroblast growth factor-21, extends lifespan in mice.	/pubmed/23066506	create date:2012/10/16 | first author:Zhang Y	2012	C57Bl/6J	N	16	N	0	XXXXXXX	N	Y	N						FGF21-Tg							16	0
474	Common mechanisms for calorie restriction and adenylyl cyclase type 5 knockout models of longevity.	/pubmed/23020244	create date:2012/10/02 | first author:Yan L	2012	129/Sv	Y	52	N	0	One sex	N	N	N						AC5-KO & WT							52	0
475	The effect of long term calorie restriction on in vivo hepatic proteostatis: a novel combination of dynamic and quantitative proteomics.	/pubmed/22984287	create date:2012/09/18 | first author:Price JC	2012	C57/BL6	Y	24	N	0	One sex	N	N	N													24	0
477	Energy balance modulates mouse skin tumor promotion through altered IGF-1R and EGFR crosstalk.	/pubmed/22896210	create date:2012/08/17 | first author:Moore T	2012	ICR	N	0	Y	120	One sex	N	N	N													0	120
478	Postmitotic neurons develop a p21-dependent senescence-like phenotype driven by a DNA damage response.	/pubmed/22882466	create date:2012/08/14 | first author:Jurk D	2012	C57Bl/6	Y		N	0	One sex	N	N	N						F4TERC-/-, F4TERC-/-CDKN1A-/-								0
479	Angiotensin-converting enzyme inhibition and food restriction in diabetic mice do not correct the increased sensitivity for ischemia-reperfusion injury.	/pubmed/22853195	create date:2012/08/03 | first author:Van der Mieren G	2012	C57BL/6J	N		N		One sex	N	N	Y						ob/ob, LDL-/-, ob/ob-LDL-/-									145
483	Daily scheduled high fat meals moderately entrain behavioral anticipatory activity, body temperature, and hypothalamic c-Fos activation.	/pubmed/22815954	create date:2012/07/21 | first author:Gallardo CM	2012	C57BL/6J, 129S1	Y	59	N	0	One sex	N	N	N													59	0
484	Effect of calorie restricted diet on brown adipose tissue in mice.	/pubmed/22803067	create date:2012/07/18 | first author:Elsukova EI	2012	ICR	Y		N		One sex	N	N	N															62
485	Wnt/_-catenin signaling is downregulated but restored by nutrition interventions in the aged heart in mice.	/pubmed/22795190	create date:2012/07/17 | first author:Li Q	2012	C3H, C57BL/6_C3H/He	N		N		One sex	N	N	N															12
486	Caloric restriction chronically impairs metabolic programming in mice.	/pubmed/22787140	create date:2012/07/13 | first author:Kirchner H	2012	C57Bl/6J	Y	48	N	0	One sex	N	N	N													48	0
487	Decreased systemic IGF-1 in response to calorie restriction modulates murine tumor cell growth, nuclear factor-_B activation, and inflammation-related gene expression.	/pubmed/22778026	create date:2012/07/11 | first author:Harvey AE	2012	C57BL/6Ncr	N	0	Y	60	One sex	N	N	N													0	60
488	Effects of ambient temperature on adaptive thermogenesis during maintenance of reduced body weight in mice.	/pubmed/22761182	create date:2012/07/05 | first author:Ravussin Y	2012	C57BL/6J, B6.V Lepob/J	Y	19	N	0	One sex	N	N	N													19	0
489	Regulation of hindbrain Pyy expression by acute food deprivation, prolonged caloric restriction, and weight loss surgery in mice.	/pubmed/22761162	create date:2012/07/05 | first author:Gelegen C	2012	C57BL6/J	Y	56	N	0	One sex	N	N	N													56	0
491	mTORC1 in the Paneth cell niche couples intestinal stem-cell function to calorie intake.	/pubmed/22722868	create date:2012/06/23 | first author:Yilmaz ÖH	2012	C57BL/6	N		N		One sex	N	N	Y						Lgr5-EGFP-IRES-creERT2, Rosa26-creERT2, UbiquitinC-creERT2, Rictorloxp, and TSCloxp
494	Activation of genes involved in xenobiotic metabolism is a shared signature of mouse models with extended lifespan.	/pubmed/22693205	create date:2012/06/14 | first author:Steinbaugh MJ	2012	(BALB/cByJ _ C57BL/6J) x (C3H/HeJ _ DBA/2J), DW/J _ C3H/HeJ, C57BL6 x 129SV	Y		N		One sex	N	N	N						dw/dw, HET3, snell, GHR-KO, WT
496	Dietary restriction attenuates age-associated muscle atrophy by lowering oxidative stress in mice even in complete absence of CuZnSOD.	/pubmed/22672615	create date:2012/06/08 | first author:Jang YC	2012	C57BL/6J	N	0	Y		One sex	N	N	N						Sod1-/-							0
497	Chronic caloric restriction partially protects against age-related alteration in serum metabolome.	/pubmed/22661299	create date:2012/06/05 | first author:De Guzman JM	2012	C57BL/6	N	0	Y		One sex	N	N	N						Only female mice were selected for this study, because it has been shown that the direction of change in the metabolite profiles upon CR are gender-specific (Mellert et al. 2011)							0
498	Effect of dietary restriction on metabolic, anatomic and molecular traits in mice depends on the initial level of basal metabolic rate.	/pubmed/22660785	create date:2012/06/05 | first author:Brzek P	2012	Swiss-Webster	Y		N	0	One sex	N	N	N						p66Shc-/- & WT								0
499	The influence of acute, late-life calorie restriction on whole body energy metabolism in p66Shc(-/-) mice.	/pubmed/22588161	create date:2012/05/17 | first author:Stern JH	2012	C57/B6J	N		N		One sex	N	N	Y															16
500	Short-term treatment with rapamycin and dietary restriction have overlapping and distinctive effects in young mice.	/pubmed/22570137	create date:2012/05/10 | first author:Fok WC	2012	C57BL/6	Y		N	0	One sex	N	N	N														0
501	Short-term calorie restriction enhances skeletal muscle stem cell function.	/pubmed/22560075	create date:2012/05/09 | first author:Cerletti M	2012	C57BL/6, C57BL/10ScSnDmdmdx, C57BL/Ka-_-actin-EGFP	N		N		One sex	N	N	Y															17
502	Responses of brown adipose tissue to diet-induced obesity, exercise, dietary restriction and ephedrine treatment.	/pubmed/22542811	create date:2012/05/01 | first author:Slocum N	2012	C57Bl/6NTac	Y	21	N	0	One sex	N	N	N													21	0
503	Chloroquine-mediated lysosomal dysfunction enhances the anticancer effect of nutrient deprivation.	/pubmed/22538436	create date:2012/04/28 | first author:Harhaji-Trajkovic L	2012	C57Bl/6	N	0	Y	32	One sex	N	N	N													0	32
504	In silico drug screen in mouse liver identifies candidate calorie restriction mimetics.	/pubmed/22533420	create date:2012/04/27 | first author:Fortney K	2012	SV129, B6C3F1, C57Bl/6, Ames dwarf, BALB/c, C57BL/6, and C3H/J, ICR,	Could not see clear evidence of CR in mice in vivo		Could not see clear evidence of CR in mice in vivo		XXXXXXX	Could not see clear evidence of CR in mice in vivo	Could not see clear evidence of CR in mice in vivo	Could not see clear evidence of CR in mice in vivo						df/df & WT
505	The influence of dietary lipid composition on skeletal muscle mitochondria from mice following 1 month of calorie restriction.	/pubmed/22503990	create date:2012/04/17 | first author:Chen Y	2012	C57BL/6	Y	104	N	0	One sex	N	N	N													104	0
506	Influence of long-term caloric restriction on myocardial and cardiomyocyte contractile function and autophagy in mice.	/pubmed/22444502	create date:2012/03/27 | first author:Han X	2012	C57BL/6	Y	15	N	0	One sex	N	N	N													15	0
507	GRP78/BiP is a novel downstream target of IGF-1 receptor mediated signaling.	/pubmed/22422508	create date:2012/03/17 | first author:Pfaffenbach KT	2012	C57BL/6	Y		N		One sex	N	N	N
508	MicroRNA-203 regulates caveolin-1 in breast tissue during caloric restriction.	/pubmed/22421148	create date:2012/03/17 | first author:Ørom UA	2012	C57BL/6J	N		N		One sex	N	N	Y
510	Dissociation of hedonic reaction to reward and incentive motivation in an animal model of the negative symptoms of schizophrenia.	/pubmed/22414818	create date:2012/03/15 | first author:Ward RD	2012	C57BL/6J: CBA	N		Y		One sex	N	N	N						D2R-OE; To be consistent with our previous behavioral experiments, female mice were used in all experiments									18
511	Calorie restriction in mice overexpressing UCP3: evidence that prior mitochondrial uncoupling alters response.	/pubmed/22406134	create date:2012/03/13 | first author:Estey C	2012	C57BL/6J	Y	16	N	0	One sex	N	N	N						UCP3Tg & WT							16	0
512	Loss of AMP-activated protein kinase-_2 impairs the insulin-sensitizing effect of calorie restriction in skeletal muscle.	/pubmed/22396207	create date:2012/03/08 | first author:Wang P	2012	C57BL/6J	Y		N		One sex	N	N	N						AMPK-_2-/- & WT
513	The GOAT-ghrelin system is not essential for hypoglycemia prevention during prolonged calorie restriction.	/pubmed/22363801	create date:2012/03/01 | first author:Yi CX	2012	C57BL/6J	N	66	N	70	XXXXXXX	N	Y	N						GOAT KO & WT, ghrelin KO, GHSR KO, ghrelin/GHSR dKO and ghrelin/GHSR WT							66	70
514	Differential effects of energy balance on experimentally-induced colitis.	/pubmed/22363133	create date:2012/03/01 | first author:McCaskey SJ	2012	129/J	N		N		One sex	N	N	Y						SMAD3-/-									92
515	A cell-autonomous role for the glucocorticoid receptor in skeletal muscle atrophy induced by systemic glucocorticoid exposure.	/pubmed/22354783	create date:2012/02/23 | first author:Watson ML	2012	FVB	N	0	Y		One sex	N	N	N						B6.FVB(129S4)-Tg(Ckmm-cre)5Khn/J							0
517	Calorie restriction increases cerebral mitochondrial respiratory capacity in a NO•-mediated mechanism: impact on neuronal survival.	/pubmed/22310960	create date:2012/02/09 | first author:Cerqueira FM	2012	Swiss	N	0	Y		One sex	N	N	N													0
518	Skeletal muscle transcriptional coactivator PGC-1_ mediates mitochondrial, but not metabolic, changes during calorie restriction.	/pubmed/22308395	create date:2012/02/07 | first author:Finley LW	2012	C57/BL6 x129	N		N		One sex	N	N	Y						PGC-1_ FLOX and MKO
520	Endogenously determined restriction of food intake overcomes excitation-contraction uncoupling in JP45KO mice with aging.	/pubmed/22297108	create date:2012/02/03 | first author:Delbono O	2012	C57BL6	Y		N	0	One sex	N	N	N						JP45-/- & WT								0
521	Deficiency of the lipid synthesis enzyme, DGAT1, extends longevity in mice.	/pubmed/22291164	create date:2012/02/01 | first author:Streeper RS	2012	C57BL/6J	N	0	Y	60	One sex	N	N	N						Dgat1-/- & WT							0	60
522	mRNA-Seq reveals complex patterns of gene regulation and expression in the mouse skeletal muscle transcriptome associated with calorie restriction.	/pubmed/22274562	create date:2012/01/26 | first author:Dhahbi JM	2012	B6C3F1	Y		N	0	One sex	N	N	N						Transcriptomics								0
523	Age-related increase in levels of 5-hydroxymethylcytosine in mouse hippocampus is prevented by caloric restriction.	/pubmed/22272625	create date:2012/01/26 | first author:Chouliaras L	2012	C57Bl6J	Y	240	N	0	One sex	N	N	N						SOD1 overexpressing							240	0
525	Opposing effects of age and calorie restriction on molecular determinants of myocardial ischemic tolerance.	/pubmed/22236144	create date:2012/01/13 | first author:Peart JN	2012	C57/Bl6	Y	31	N	0	One sex	N	N	N													31	0
526	Impact of aging and diet restriction on retinal function during and after acute intraocular pressure injury.	/pubmed/22217415	create date:2012/01/06 | first author:Kong YX	2012	C57BL/6J	N	30	Y	0	One sex	N	N	N													30	0
527	Dietary restriction increases skeletal muscle mitochondrial respiration but not mitochondrial content in C57BL/6 mice.	/pubmed/22212415	create date:2012/01/04 | first author:Hempenstall S	2012	C57BL/6N	Y	24	N	0	One sex	N	N	N													24	0
528	A role for neuronal cAMP responsive-element binding (CREB)-1 in brain responses to calorie restriction.	/pubmed/22190495	create date:2011/12/23 | first author:Fusco S	2011	129SvOla, C57/BL6, FVB/N, 129/J	Y		N	0	One sex	N	N	N						BCKO, Sirt1KO, WT								0
529	Effects of age and caloric restriction on mitochondrial protein oxidative damage in mice.	/pubmed/22182424	create date:2011/12/21 | first author:Li XD	2011	DBA/2J, C57BL/6J	Y	66	N	0	One sex	N	N	N													66	0
531	Obesity and weight loss result in increased adipose tissue ABCG1 expression in db/db mice.	/pubmed/22179025	create date:2011/12/20 | first author:Edgel KA	2011	C57BLKS	N	0	Y		One sex	N	N	N						db/db & WT							0
532	Sexual dimorphism in cardiac triacylglyceride dynamics in mice on long term caloric restriction.	/pubmed/22178085	create date:2011/12/20 | first author:Banke NH	2011	129/SvJ	N	27	N	21	XXXXXXX	N	Y	N						Reports sex difference							27	21
535	Chronic caloric restriction attenuates a loss of sulfatide content in PGC-1_-/- mouse cortex: a potential lipidomic role of PGC-1_ in neurodegeneration.	/pubmed/22114039	create date:2011/11/25 | first author:Kiebish MA	2011	C57BL6/J	N		N		One sex	N	N	Y						PGC-1_-/- & WT
536	Caloric restriction modifies both innate and adaptive immunity in the mouse small intestine.	/pubmed/22086353	create date:2011/11/17 | first author:Suárez-Souto MA	2011	Balb/c	Y	12	N	0	One sex	N	N	N													12	0
537	A comprehensive assessment of mitochondrial protein synthesis and cellular proliferation with age and caloric restriction.	/pubmed/22081942	create date:2011/11/16 | first author:Miller BF	2011	B6D2F1	Y		N	0	One sex	N	N	N														0
538	Myocardial remodelling in left ventricular atrophy induced by caloric restriction.	/pubmed/22077432	create date:2011/11/15 | first author:Gruber C	2011	C57BL/6J	Y	15	N	0	One sex	N	N	N													15	0
540	Estrogen modulates abdominal adiposity and protects female mice from obesity and impaired glucose tolerance.	/pubmed/22042005	create date:2011/11/02 | first author:Stubbins RE	2011	C57BL/6 J	N	30	N	150	XXXXXXX	N	Y	N													30	150	195
541	Metabolic effects of intra-abdominal fat in GHRKO mice.	/pubmed/22040032	create date:2011/11/02 | first author:Masternak MM	2011	129Ola/BALB/c	Y		N	0	One sex	N	N	N						GHR-KO & WT								0
542	SirT1 catalytic activity is required for male fertility and metabolic homeostasis in mice.	/pubmed/22006156	create date:2011/10/19 | first author:Seifert EL	2011	129/CD1, 129/SvJ	N	15	N	12	XXXXXXX	N	Y	N						Sirt-/- & WT							15	12
543	Factors predicting individual variability in diet-induced weight loss in MF1 mice.	/pubmed/21996667	create date:2011/10/15 | first author:Vaanholt LM	2011	MF1	N	65	N	62	XXXXXXX	N	Y	N													65	62	127
545	Sirt1 enhances skeletal muscle insulin sensitivity in mice during caloric restriction.	/pubmed/21985785	create date:2011/10/12 | first author:Schenk S	2011	C57BL/6	Y		N	0	One sex	N	N	N						Sirt1-/-,								0
546	Repletion of TNF_ or leptin in calorically restricted mice suppresses post-restriction hyperphagia.	/pubmed/21954068	create date:2011/09/29 | first author:Hambly C	2011	MF1	Y	80	N	0	One sex	N	N	N													80	0
547	Dietary energy balance modulates prostate cancer progression in Hi-Myc mice.	/pubmed/21952584	create date:2011/09/29 | first author:Blando J	2011	FVB/N	Y	36	N	0	One sex	N	N	N						Hi-Myc							36	0
548	Alteration in N-glycomics during mouse aging: a role for FUT8.	/pubmed/21951615	create date:2011/09/29 | first author:Vanhooren V	2011	C57BL/6	Y	41	N	0	One sex	N	N	N						Other mouse & transgenetics, but not CR'd							41	0
551	Dietary restriction regulates brain acetylcholinesterase in female mice as a function of age.	/pubmed/21870149	create date:2011/08/27 | first author:Suchiang K	2011	Balb/C	N	0	Y		One sex	N	N	N													0
552	Partial inactivation of Ankrd26 causes diabetes with enhanced insulin responsiveness of adipose tissue in mice.	/pubmed/21842266	create date:2011/08/16 | first author:Raciti GA	2011	C57/Bl6	Y	48	N	0	One sex	N	N	N						Ankrd26 & WT							48	0
553	Dietary restriction of mice on a high-fat diet induces substrate efficiency and improves metabolic health.	/pubmed/21830320	create date:2011/08/11 | first author:Duivenvoorde LP	2011	C57BL/6JOlaHsd	Y	36	N	0	One sex	N	N	N													36	0
554	Differential effect of weight loss with low-fat diet or high-fat diet restriction on inflammation in the liver and adipose tissue of mice with diet-induced obesity.	/pubmed/21824616	create date:2011/08/10 | first author:Wang Q	2011	C57BL/6J	Y		N	0	One sex	N	N	N														0
556	Expression of key regulators of mitochondrial biogenesis in growth hormone receptor knockout (GHRKO) mice is enhanced but is not further improved by other potential life-extending interventions.	/pubmed/21788651	create date:2011/07/27 | first author:Gesing A	2011	C57BL6 x 129SV	N	89	N	0	XXXXXXX	N	Y	N						GHRKO & WT							89	0
557	Synergistic induction of lipid catabolism and anti-inflammatory lipids in white fat of dietary obese mice in response to calorie restriction and n-3 fatty acids.	/pubmed/21779874	create date:2011/07/23 | first author:Flachs P	2011	C57BL/6J	Y		N	0	One sex	N	N	N														0
559	Prevention of age-related changes in hippocampal levels of 5-methylcytidine by caloric restriction.	/pubmed/21764481	create date:2011/07/19 | first author:Chouliaras L	2011	C57Bl6J	Y	240	N	0	One sex	N	N	N						SOD1-/- & WT							240	0
560	Dietary restriction but not rapamycin extends disease onset and survival of the H46R/H48Q mouse model of ALS.	/pubmed/21763036	create date:2011/07/19 | first author:Bhattacharya A	2011	C57B6/J	N		N		XXXXXXX	Y	N	N						G93A1Gur									88
561	Key regulators of mitochondrial biogenesis are increased in kidneys of growth hormone receptor knockout (GHRKO) mice.	/pubmed/21755522	create date:2011/07/15 | first author:Gesing A	2011	C57BL6 x 129SV	N	43	N	46	XXXXXXX	N	Y	N						GHRKO & WT							43	46
563	PDK1-Foxo1 in agouti-related peptide neurons regulates energy homeostasis by modulating food intake and energy expenditure.	/pubmed/21694754	create date:2011/06/23 | first author:Cao Y	2011	NA	Y		N		One sex	N	N	N						AGRPPdk1-/-, _256Foxo1AGRPPdk1-/-, & WT
564	Caloric restriction improves coagulation and inflammation profile in obese mice.	/pubmed/21689844	create date:2011/06/22 | first author:Lijnen HR	2011	C57Bl/6	Y	15	N	0	One sex	N	N	N													15	0
565	Accumulation of long-chain glycosphingolipids during aging is prevented by caloric restriction.	/pubmed/21687659	create date:2011/06/21 | first author:Hernández-Corbacho MJ	2011	C57BL/6	Y	55	N	0	One sex	N	N	N													55	0
566	Effect of weight loss on gelatinase levels in obese mice.	/pubmed/21671984	create date:2011/06/16 | first author:Van Hul M	2011	C57Bl/6	Y	15	N	0	One sex	N	N	N													15	0
570	Limited role of Sirt1 in cancer protection by dietary restriction.	/pubmed/21606675	create date:2011/05/25 | first author:Herranz D	2011	NA	N	75	N	0	One sex	N	N	Y						Sirt1-tg, p53+/-							75	0
571	Rapamycin partially mimics the anticancer effects of calorie restriction in a murine model of pancreatic cancer.	/pubmed/21593197	create date:2011/05/20 | first author:Lashinger LM	2011	C57BL/6	Y	45	N	0	One sex	N	N	N													45	0
572	Genetic reduction of insulin-like growth factor-1 mimics the anticancer effects of calorie restriction on cyclooxygenase-2-driven pancreatic neoplasia.	/pubmed/21593196	create date:2011/05/20 | first author:Lashinger LM	2011	FVB-Tg	Y		N		One sex	N	N	N						KRT5-Ptgs2, BK5.COX-2									96
574	Effects of potential dietary inhibitors of endogenous DNA damage on mutagenesis and lipid peroxidation in lacZ mice.	/pubmed/21538553	create date:2011/05/04 | first author:Kosinska W	2011	BALBc X DBA/2	Y	50	N	0	One sex	N	N	N						LacZ							50	0
576	Association between life-span extension by caloric restriction and thiol redox state in two different strains of mice.	/pubmed/21530646	create date:2011/05/03 | first author:Rebrin I	2011	DBA/2JNia, C57BL/6JNia	Y	66	N	0	One sex	N	N	N													66	0
577	Skeletal muscle gene expression profile is modified by dietary protein source and calcium during energy restriction.	/pubmed/21525773	create date:2011/04/29 | first author:Tauriainen E	2011	C57BL/6J	Y	50	N	0	One sex	N	N	N													50	0
578	Calorie restriction attenuates LPS-induced sickness behavior and shifts hypothalamic signaling pathways to an anti-inflammatory bias.	/pubmed/21525175	create date:2011/04/29 | first author:MacDonald L	2011	C57BL/6J	Y	83	N	0	One sex	N	N	N													83	0
579	Gross energy metabolism in mice under late onset, short term caloric restriction.	/pubmed/21507329	create date:2011/04/22 | first author:Cameron KM	2011	C57Bl/6	Y	90	N	0	One sex	N	N	N													90	0
580	Caloric restriction influences hydrogen peroxide generation in mitochondrial sub-populations from mouse liver.	/pubmed/21505800	create date:2011/04/21 | first author:Hagopian K	2011	C57BL/6J	Y	12	N	0	One sex	N	N	N													12	0
583	Mild mitochondrial uncoupling and calorie restriction increase fasting eNOS, akt and mitochondrial biogenesis.	/pubmed/21483800	create date:2011/04/13 | first author:Cerqueira FM	2011	Swiss	N	0	Y		One sex	N	N	N													0
586	Influence of caloric restriction on constitutive expression of NF-_B in an experimental mouse astrocytoma.	/pubmed/21479220	create date:2011/04/12 | first author:Mulrooney TJ	2011	C57BL/6J	Y	20	N	0	One sex	N	N	N													20	0
587	Single gene deletions of orexin, leptin, neuropeptide Y, and ghrelin do not appreciably alter food anticipatory activity in mice.	/pubmed/21464907	create date:2011/04/06 | first author:Gunapala KM	2011	C57BL/6J	Y	26	N	0	One sex	N	N	N													26	0
588	Effects of intermittent and chronic calorie restriction on mammalian target of rapamycin (mTOR) and IGF-I signaling pathways in mammary fat pad tissues and mammary tumors.	/pubmed/21462085	create date:2011/04/05 | first author:Dogan S	2011	C57BL6	N	0	Y		One sex	N	N	N						MMTV-TGF-_							0
589	Calorie restriction modifies ubiquinone and COQ transcript levels in mouse tissues.	/pubmed/21447381	create date:2011/03/31 | first author:Parrado-Fernández C	2011	C57BL/6	Y	32	N	0	One sex	N	N	N													32	0
590	Central leptin signaling is required to normalize myocardial fatty acid oxidation rates in caloric-restricted ob/ob mice.	/pubmed/21441440	create date:2011/03/29 | first author:Sloan C	2011	C57BL/6J	Y	167	N	0	One sex	N	N	N						ob/ob							167	0
592	Caloric restriction in leptin deficiency does not correct myocardial steatosis: failure to normalize PPAR{alpha}/PGC1{alpha} and thermogenic glycerolipid/fatty acid cycling.	/pubmed/21427359	create date:2011/03/24 | first author:Rame JE	2011	C57BL/6J	N		N		One sex	N	N	Y						ob/ob
593	RasGrf1 deficiency delays aging in mice.	/pubmed/21422498	create date:2011/03/23 | first author:Borrás C	2011	C57Bl/6N	Y	16	N	0	One sex	N	N	N						RasGrf1-/-							16	0
594	Gain of survival signaling by down-regulation of three key miRNAs in brain of calorie-restricted mice.	/pubmed/21415464	create date:2011/03/19 | first author:Khanna A	2011	C57BL/6	N		N		One sex	N	N	Y															18
595	Effects of chronic weight perturbation on energy homeostasis and brain structure in mice.	/pubmed/21411766	create date:2011/03/18 | first author:Ravussin Y	2011	C57BL/6J	Y	31	N	0	One sex	N	N	N													31	0
597	Fat maintenance is a predictor of the murine lifespan response to dietary restriction.	/pubmed/21388497	create date:2011/03/11 | first author:Liao CY	2011	ILSXISS	N	38 strains	N	33 strains	XXXXXXX	N	Y	N													38 strains	33 strains
599	The arcuate nucleus and neuropeptide Y contribute to the antitumorigenic effect of calorie restriction.	/pubmed/21385308	create date:2011/03/10 | first author:Minor RK	2011	C57BL/6J	Y		N	0	One sex	N	N	N														0
602	Energy intake and adiponectin gene expression.	/pubmed/21325106	create date:2011/02/18 | first author:Qiao L	2011	C57BL/6	Y	50	N	0	One sex	N	N	N						ob/ob, PPAR_ KO, A/J							50	0
603	Decreased expression level of apoptosis-related genes and/or proteins in skeletal muscles, but not in hearts, of growth hormone receptor knockout mice.	/pubmed/21321312	create date:2011/02/16 | first author:Gesing A	2011	C57BL6 x 129SV	N	0	Y	46	One sex	N	N	N						GHRKO							0	46
604	Effects of calorie restriction on the age-dependent accumulation of mutations in the small intestine of lacZ-transgenic mice.	/pubmed/21300080	create date:2011/02/09 | first author:He D	2011	BALBc X DBA/2	N	8	N	8	XXXXXXX	N	Y	N						LacZ							8	8
605	The effects of physiological adaptations to calorie restriction on global cell proliferation rates.	/pubmed/21285400	create date:2011/02/03 | first author:Bruss MD	2011	C57BL/6	N		N	60+	XXXXXXX	N	Y	N														60+
607	Long-term caloric restriction up-regulates PPAR gamma co-activator 1 alpha (PGC-1alpha) expression in mice.	/pubmed/21280563	create date:2011/02/02 | first author:Ranhotra HS	2011	Balb/c	Y	12	N	0	One sex	N	N	N													12	0
608	Effect of chronic and intermittent calorie restriction on serum adiponectin and leptin and mammary tumorigenesis.	/pubmed/21257708	create date:2011/01/25 | first author:Rogozina OP	2011	C57BL6	N	0	Y	225	One sex	N	N	N						MMTV-TGF-a							0	225
609	Sirt3 promotes the urea cycle and fatty acid oxidation during dietary restriction.	/pubmed/21255725	create date:2011/01/25 | first author:Hallows WC	2011	C57BL/6J	N		N		One sex	N	N	Y						Sirt3-/-
610	A role for _FosB in calorie restriction-induced metabolic changes.	/pubmed/21215388	create date:2011/01/11 | first author:Vialou V	2011	c57BL6/J	Y	32	N	0	One sex	N	N	N						Orexin-/- & WT							32	0
611	Photoperiod interacts with food restriction in performance in the Barnes maze in female California mice.	/pubmed/21198981	create date:2011/01/05 | first author:Steinman MQ	2011	California	N	0	Y	35	One sex	N	N	N													0	35
613	Caloric restriction attenuates age-related changes of DNA methyltransferase 3a in mouse hippocampus.	/pubmed/21172419	create date:2010/12/22 | first author:Chouliaras L	2010	C57Bl6J	N		N		One sex	N	N	Y						SOD1-/- & WT
614	Reduction of dietary energy density reduces body mass regain following energy restriction in female mice.	/pubmed/21169228	create date:2010/12/21 | first author:Cameron KM	2010	MF1	N	0	Y	15	One sex	N	N	N													0	15
615	Systemic ghrelin and reward: effect of cholinergic blockade.	/pubmed/21163280	create date:2010/12/18 | first author:Disse E	2010	C57BL6J	Y	32	N	0	One sex	N	N	N						GHSR1a-/-							32	0
616	Improved cardiac metabolism and activation of the RISK pathway contributes to improved post-ischemic recovery in calorie restricted mice.	/pubmed/21140129	create date:2010/12/09 | first author:Sung MM	2010	C57Bl6	N		N		One sex	N	N	Y
617	Caloric restriction decreases ER stress in liver and adipose tissue in ob/ob mice.	/pubmed/21134353	create date:2010/12/08 | first author:Tsutsumi A	2010	C57BL/6J	Y	48	N	0	One sex	N	N	N						ob/ob & WT							48	0
618	Caloric restriction experience reprograms stress and orexigenic pathways and promotes binge eating.	/pubmed/21123586	create date:2010/12/03 | first author:Pankevich DE	2010	C57BL/6J	Y	78	N	0	One sex	N	N	N													78	0
619	Calorie restriction reduces oxidative stress by SIRT3-mediated SOD2 activation.	/pubmed/21109198	create date:2010/11/27 | first author:Qiu X	2010	C57BL/6J	N		N		One sex	N	N	Y						sirt3-/- & WT									8
620	Inactivation of Bardet-Biedl syndrome genes causes kidney defects.	/pubmed/21106857	create date:2010/11/26 | first author:Guo DF	2010	C57BL/6J x 129/SvEv	N		N		One sex	N	N	Y						bbs2-/-, bbs4-/- & WT
622	Sirt3 mediates reduction of oxidative damage and prevention of age-related hearing loss under caloric restriction.	/pubmed/21094524	create date:2010/11/26 | first author:Someya S	2010	C57BL/6J	N		N		One sex	N	N	Y						sirt3-/- & WT
624	Blocking dopamine D2 receptors by haloperidol curtails the beneficial impact of calorie restriction on the metabolic phenotype of high-fat diet induced obese mice.	/pubmed/21062378	create date:2010/11/11 | first author:de Leeuw van Weenen JE	2010	C57Bl ⁄ 6J	Y	54	N	0	One sex	N	N	N													54	0
625	Type 2 diabetes in mice induces hepatic overexpression of sulfatase 2, a novel factor that suppresses uptake of remnant lipoproteins.	/pubmed/21049473	create date:2010/11/05 | first author:Chen K	2010	C57BLKS	Y	27	N	0	One sex	N	N	N						Leprdb/db & WT							27	0
627	Life-long caloric restriction elicits pronounced protection of the aged myocardium: a role for AMPK.	/pubmed/20934448	create date:2010/10/12 | first author:Edwards AG	2010	B6D2F1	N	22	N	0	One sex	N	N	Y													22	0
628	Caloric restriction does not alter effects of aging in cardiac side population cells.	/pubmed/20922487	create date:2010/10/06 | first author:Mulligan JD	2010	C57Bl/6	Y	18	N	0	One sex	N	N	N													18	0
629	Caloric restriction increases free radicals and inducible nitric oxide synthase expression in mice infected with Salmonella Typhimurium.	/pubmed/20883207	create date:2010/10/05 | first author:Trujillo-Ferrara J	2010	Balb/c	N	150	N	0	One sex	N	N	Y													150	0
631	Development of a bioassay to screen for chemicals mimicking the anti-aging effects of calorie restriction.	/pubmed/20846506	create date:2010/09/18 | first author:Chiba T	2010	ICR	Y	10	N	0	One sex	N	N	N													10	0
632	Adult-onset, short-term dietary restriction reduces cell senescence in mice.	/pubmed/20844316	create date:2010/09/17 | first author:Wang C	2010	C57/BL	Y	90	N	0	One sex	N	N	N													90	0
636	Caloric restriction and aging but not overexpression of SOD1 affect hippocampal volumes in mice.	/pubmed/20728464	create date:2010/08/24 | first author:Rutten BP	2010	C57Bl6	Y	240	N	0	One sex	N	N	N						SOD1 overexpresison & WT							240	0
637	The fat-1 transgene in mice increases antioxidant potential, reduces pro-inflammatory cytokine levels, and enhances PPAR-gamma and SIRT-1 expression on a calorie restricted diet.	/pubmed/20716918	create date:2010/08/19 | first author:Rahman M	2010	C57BL6	N		Y	0	One sex	N	N	N						Fat-1								0
640	Attenuation of age-related changes in mouse neuromuscular synapses by caloric restriction and exercise.	/pubmed/20679195	create date:2010/08/04 | first author:Valdez G	2010	C57BL/6	N		N		One sex	N	N	Y						Thy1-XFP									9
641	Preoperative dietary restriction reduces hepatic tumor load by reduced E-selectin-mediated adhesion in mice.	/pubmed/20672315	create date:2010/07/31 | first author:van Ginhoven TM	2010	BALB/c	Y	10	N	0	One sex	N	N	N													10	0
642	Calorie restriction as an anti-invasive therapy for malignant brain cancer in the VM mouse.	/pubmed/20664705	create date:2010/07/29 | first author:Shelton LM	2010	VM/Dk	Y		N		One sex	N	N	N
643	Caloric restriction attenuates the age-associated increase of adipose-derived stem cells but further reduces their proliferative capacity.	/pubmed/20628827	create date:2010/07/16 | first author:Schmuck EG	2010	C57BL/6	Y	48	N	0	One sex	N	N	N													48	0
646	Short-term re-feeding of previously energy-restricted C57BL/6 male mice restores body weight and body fat and attenuates the decline in natural killer cell function after primary influenza infection.	/pubmed/20534876	create date:2010/06/11 | first author:Clinthorne JF	2010	C57BL/6	Y		N	0	One sex	N	N	N														0
647	Caloric restriction reverses high-fat diet-induced endothelial dysfunction and vascular superoxide production in C57Bl/6 mice.	/pubmed/20512454	create date:2010/06/01 | first author:Ketonen J	2010	C57Bl/6	Y	40	N	0	One sex	N	N	N													40	0
649	Seizure tests distinguish intermittent fasting from the ketogenic diet.	/pubmed/20477852	create date:2010/05/19 | first author:Hartman AL	2010	Swiss	Y	46	N	0	One sex	N	N	N													46	0
650	Glutamine targeting inhibits systemic metastasis in the VM-M3 murine tumor model.	/pubmed/20473919	create date:2010/05/18 | first author:Shelton LM	2010	VM	Y		N		One sex	N	N	N															46
653	Calorie restriction enhances cell adaptation to hypoxia through Sirt1-dependent mitochondrial autophagy in mouse aged kidney.	/pubmed/20335657	create date:2010/03/26 | first author:Kume S	2010	C57BL/6, SV129	Y	46	N	0	One sex	N	N	N						Sirt1+/-							46	0
655	Dietary energy restriction, in part through glucocorticoid hormones, mediates the impact of 12-O-tetradecanoylphorbol-13-acetate on jun D and fra-1 in Sencar mouse epidermis.	/pubmed/20232358	create date:2010/03/17 | first author:Przybyszewski J	2010	SENCAR	N	0	Y		One sex	N	N	N													0
656	Ghrelin O-acyltransferase (GOAT) is essential for growth hormone-mediated survival of calorie-restricted mice.	/pubmed/20231469	create date:2010/03/17 | first author:Zhao TJ	2010	C57BL/6J	Y		N	0	One sex	N	N	N						Goat-/- & WT								0
657	Caloric restriction leads to high marrow adiposity and low bone mass in growing mice.	/pubmed/20229598	create date:2010/03/17 | first author:Devlin MJ	2010	C57Bl/6J	Y	40	N	0	One sex	N	N	N													40	0
658	FoxO1 is involved in the antineoplastic effect of calorie restriction.	/pubmed/20222901	create date:2010/03/13 | first author:Yamaza H	2010	C57BL/6J	Y		N		One sex	N	N	N						FoxO1_HT
659	Macrophage migration inhibitory factor-knockout mice are long lived and respond to caloric restriction.	/pubmed/20219983	create date:2010/03/12 | first author:Harper JM	2010	C57BL/6J x 129/SvJ	N	0	Y	126	One sex	N	N	N						MIF-KO							0	126
661	Absence of uncoupling protein-3 leads to greater activation of an adenine nucleotide translocase-mediated proton conductance in skeletal muscle mitochondria from calorie restricted mice.	/pubmed/20206124	create date:2010/03/09 | first author:Bevilacqua L	2010	C57BL/6J	Y	24	N	0	One sex	N	N	N						Ucp3-KO							24	0
662	Dietary energy availability affects primary and metastatic breast cancer and metformin efficacy.	/pubmed/20204498	create date:2010/03/06 | first author:Phoenix KN	2010	Balb/c	N	0	Y	55	One sex	N	N	N													0	55
665	Caloric restriction shortens lifespan through an increase in lipid peroxidation, inflammation and apoptosis in the G93A mouse, an animal model of ALS.	/pubmed/20195368	create date:2010/03/03 | first author:Patel BP	2010	B6SJL	N	14	N	13	XXXXXXX	N	Y	N						SOD1-/-							14	13
669	Diet and exercise signals regulate SIRT3 and activate AMPK and PGC-1alpha in skeletal muscle.	/pubmed/20157566	create date:2010/02/17 | first author:Palacios OM	2010	C57BL/6	Y	15	N	13	One sex	N	N	N													15	13
672	Short-term calorie restriction reverses vascular endothelial dysfunction in old mice by increasing nitric oxide and reducing oxidative stress.	/pubmed/20121721	create date:2010/02/04 | first author:Rippe C	2010	B6D2F1	Y	40	N	0	One sex	N	N	N													40	0
674	The impact of acute caloric restriction on the metabolic phenotype in male C57BL/6 and DBA/2 mice.	/pubmed/20064544	create date:2010/01/13 | first author:Hempenstall S	2010	C57BL/6, DBA/2	Y	32	N	0	One sex	N	N	N													32	0
676	SIRT1 suppresses activator protein-1 transcriptional activity and cyclooxygenase-2 expression in macrophages.	/pubmed/20042607	create date:2010/01/01 | first author:Zhang R	2010	C57BL/6	Y		N	0	One sex	N	N	N														0
677	Neuronal SIRT1 regulates endocrine and behavioral responses to calorie restriction.	/pubmed/20008932	create date:2009/12/17 | first author:Cohen DE	2009	C57Bl/6	Y		N		One sex	N	N	N						male mice were analyzed except where otherwise noted, but similar phenotypes were observed in both genders (data not shown), BSKO & WT
679	Immune deviation and alleviation of allergic reactions in mice subjected to dietary restriction.	/pubmed/19966458	create date:2009/12/08 | first author:Yamazaki K	2009	C57BL/6, DBA/1, BALB/c	Y		N	0	One sex	N	N	N														0
682	Modulation of type I iodothyronine 5'-deiodinase activity in white adipose tissue by nutrition: possible involvement of leptin.	/pubmed/19929143	create date:2009/11/26 | first author:Macek Jílková Z	2009	C57BL/6J	Y		N	0	One sex	N	N	N														0
684	Calorie restriction increases fatty acid synthesis and whole body fat oxidation rates.	/pubmed/19887594	create date:2009/11/06 | first author:Bruss MD	2009	C57BL/6J	Y	12	N	0	One sex	N	N	N													12	0
685	Short-term dietary restriction and fasting precondition against ischemia reperfusion injury in mice.	/pubmed/19878145	create date:2009/11/03 | first author:Mitchell JR	2009	C57BL/6J	Y		N	0	One sex	N	N	N														0
686	Genetic variation in the murine lifespan response to dietary restriction: from life extension to life shortening.	/pubmed/19878144	create date:2009/11/03 | first author:Liao CY	2009	ILSXISS	N	41strains	N	39strains	XXXXXXX	Y	N	N													41strains	39strains
687	Caloric restriction alleviates abnormal locomotor activity and dopamine levels in the brain of the methionine sulfoxide reductase A knockout mouse.	/pubmed/19854239	create date:2009/10/27 | first author:Oien DB	2009	NA	N		N		One sex	N	N	Y						MsrA-/- & WT									23
689	Leptin is essential in maintaining normal vascular compliance independent of body weight.	/pubmed/19806156	create date:2009/10/07 | first author:Sikka G	2009	C57BL/6	N		N		One sex	N	N	Y						ob/ob
690	Mild calorie restriction induces fat accumulation in female C57BL/6J mice.	/pubmed/19798071	create date:2009/10/03 | first author:Li X	2009	C57BL/6J	N	0	Y	20	One sex	N	N	N													0	20
694	Regulation of selenoproteins and methionine sulfoxide reductases A and B1 by age, calorie restriction, and dietary selenium in mice.	/pubmed/19769460	create date:2009/09/23 | first author:Novoselov SV	2009	Balb/c	N		N		XXXXXXX	N	Y	N
695	Changes in behavior and gene expression induced by caloric restriction in C57BL/6 mice.	/pubmed/19737990	create date:2009/09/10 | first author:Yamamoto Y	2009	C57BL/6	Y	108	N	0	One sex	N	N	N													108	0
699	Caloric restriction attenuates amyloid deposition in middle-aged dtg APP/PS1 mice.	/pubmed/19699265	create date:2009/08/25 | first author:Mouton PR	2009	C57BL/6 & C3He/J	Y		N	0	One sex	N	N	N						APPswe/ PS1_E9								0
702	Serum insulin-like growth factor-I and mammary tumor development in ad libitum-fed, chronic calorie-restricted, and intermittent calorie-restricted MMTV-TGF-alpha mice.	/pubmed/19654106	create date:2009/08/06 | first author:Rogozina OP	2009	C57BL6	N	0	Y	225	One sex	N	N	N						MMTV-TGF-_							0	225
703	Inhibition of thymic adipogenesis by caloric restriction is coupled with reduction in age-related thymic involution.	/pubmed/19648267	create date:2009/08/04 | first author:Yang H	2009	C57B6L/J	N	0	Y	48	One sex	N	N	N													0	48
704	Systematic gene expression profile of hypothalamus in calorie-restricted mice implicates the involvement of mTOR signaling in neuroprotective activity.	/pubmed/19647013	create date:2009/08/04 | first author:Wu P	2009	C57BL/6	Y	48	N	0	One sex	N	N	N						Transcriptomics							48	0
705	Cutaneous morphometric parameters of young FVB/N mice sustained in aged mice and in calorically restricted transgenic alphaMUPA mice.	/pubmed/19595264	create date:2009/07/15 | first author:Matanis E	2009	FVB/N	N		N		One sex	N	N	Y						_MUPA & WT									54
706	Calorie restriction alters mitochondrial protein acetylation.	/pubmed/19594485	create date:2009/07/15 | first author:Schwer B	2009	C57BL/6	N		N		One sex	N	N	Y
710	Gene expression profiling of aging in multiple mouse strains: identification of aging biomarkers and impact of dietary antioxidants.	/pubmed/19555370	create date:2009/06/27 | first author:Park SK	2009	C57BL/6NHsd	Y		N	0	One sex	N	N	N						Transcriptomics								0
715	Overexpression of FOXO1 in skeletal muscle does not alter longevity in mice.	/pubmed/19426753	create date:2009/05/12 | first author:Chiba T	2009	C57BL/6	Y		N	50	One sex	N	N	N						Foxo1 pverexpression & WT								50	386
718	Short-term calorie restriction in male mice feminizes gene expression and alters key regulators of conserved aging regulatory pathways.	/pubmed/19370158	create date:2009/04/17 | first author:Estep PW 3rd	2009	ICR	Y	35	N	0	One sex	N	N	N						Transcriptomics							35	0
720	Insulin sensitivity as a key mediator of growth hormone actions on longevity.	/pubmed/19304940	create date:2009/03/24 | first author:Masternak MM	2009	Ames dwarf	N		N		XXXXXXX	Y	N	N						GHRKO & WT
721	Axin expression in thymic stromal cells contributes to an age-related increase in thymic adiposity and is associated with reduced thymopoiesis independently of ghrelin signaling.	/pubmed/19299626	create date:2009/03/21 | first author:Yang H	2009	C57/B6	N	0	Y	40	One sex	N	N	N													0	40
724	Voluntary exercise and caloric restriction enhance hippocampal dendritic spine density and BDNF levels in diabetic mice.	/pubmed/19280661	create date:2009/03/13 | first author:Stranahan AM	2009	C57Bl/6	Y	48	N	0	One sex	N	N	N						db/db & WT							48	0
725	Tumours with PI3K activation are resistant to dietary restriction.	/pubmed/19279572	create date:2009/03/13 | first author:Kalaany NY	2009	NOD/SCID	N		N		XXXXXXX	N	Y	N						Females for breast cancer, males for all other
726	Effect of ultraviolet B radiation on activator protein 1 constituent proteins and modulation by dietary energy restriction in SKH-1 mouse skin.	/pubmed/19263438	create date:2009/03/06 | first author:Hopper BD	2009	SKH-1	N	0	Y		One sex	N	N	N													0
727	Downregulation of Grb2 contributes to the insulin-sensitizing effect of calorie restriction.	/pubmed/19240254	create date:2009/02/26 | first author:Liu X	2009	C57BL/6	Y	15	N	0	One sex	N	N	N						Grb-/- & WT							15	0
729	Disruption of growth hormone receptor prevents calorie restriction from improving insulin action and longevity.	/pubmed/19234595	create date:2009/02/24 | first author:Bonkowski MS	2009	129Ola/BALB/c	N		N	0	XXXXXXX	N	Y	N						GHRKO & WT								0
730	Technetium-99m-GSA clearance in mice under long-term dietary restriction.	/pubmed/19225934	create date:2009/02/20 | first author:Kouda K	2009	ICR	Y	12	N	0	One sex	N	N	N													12	0
731	Diabetic kidney lesions of GIPRdn transgenic mice: podocyte hypertrophy and thickening of the GBM precede glomerular hypertrophy and glomerulosclerosis.	/pubmed/19211686	create date:2009/02/13 | first author:Herbach N	2009	CD1	N	32	N	32	XXXXXXX	N	Y	N						GIPRdn							32	32
732	Improvements in body fat distribution and circulating adiponectin by alternate-day fasting versus calorie restriction.	/pubmed/19195863	create date:2009/02/07 | first author:Varady KA	2009	C57BL/6J	N	0	Y	30	One sex	N	N	N													0	30
733	Requirement of Bardet-Biedl syndrome proteins for leptin receptor signaling.	/pubmed/19150989	create date:2009/01/20 | first author:Seo S	2009	C57BL/6J x 129/SvEv	N		N		One sex	N	N	Y						bbs2-/-, bbs4-/- & WT
736	Effects of different levels of food restriction on passive-avoidance memory and the expression of synapsin I in young mice.	/pubmed/19125380	create date:2009/01/07 | first author:Deng L	2009	Kunming	Y	60	N	0	One sex	N	N	N													60	0
739	Regulation of forkhead transcription factor FoxO3a contributes to calorie restriction-induced prevention of Alzheimer's disease-type amyloid neuropathology and spatial memory deterioration.	/pubmed/19076455	create date:2008/12/17 | first author:Qin W	2008	Swiss Webster X C57B6/DBA2	N	0	Y	9	One sex	N	N	N						Tg2576							0	9
741	Resveratrol treatment in mice does not elicit the bradycardia and hypothermia associated with calorie restriction.	/pubmed/19056839	create date:2008/12/06 | first author:Mayers JR	2008	C57Bl/6J	Y	17	N	0	One sex	N	N	N						ob/ob & WT							17	0
742	Akt-dependent proapoptotic effects of dietary restriction on late-stage management of a phosphatase and tensin homologue/tuberous sclerosis complex 2-deficient mouse astrocytoma.	/pubmed/19047102	create date:2008/12/03 | first author:Marsh J	2008	C57BL/6J	Y	33	N	0	One sex	N	N	N													33	0
744	Effects of short-term mild calorie restriction diet and renutrition with ruminant milks on leptin levels and other metabolic parameters in mice.	/pubmed/19036563	create date:2008/11/28 | first author:Gauffin Cano MP	2008	Swiss	Y	18	N	0	One sex	N	N	N													18	0
746	Caloric restriction stimulates revascularization in response to ischemia via adiponectin-mediated activation of endothelial nitric-oxide synthase.	/pubmed/18990685	create date:2008/11/08 | first author:Kondo M	2008	C57/BL6	Y	12	N	0	One sex	N	N	N						eNOS-KO, APN-KO, WT							12	0
747	Dietary manipulation of mouse metabolism.	/pubmed/18972384	create date:2008/10/31 | first author:Feige JN	2008	C57BL/6J	N		N		XXXXXXX	N	Y	N
749	Caloric restriction counteracts age-related changes in the activities of sorbitol metabolizing enzymes from mouse liver.	/pubmed/18953666	create date:2008/10/28 | first author:Hagopian K	2008	C57Bl/6J	Y		N	0	One sex	N	N	N														0
750	Characterization of survival and phenotype throughout the life span in UCP2/UCP3 genetically altered mice.	/pubmed/18854208	create date:2008/10/16 | first author:McDonald RB	2008	C57BL/6J	N		Y		One sex	N	N	N						overexpress UCP2/3, UCP3KO & WT									207
751	Effect of aging, caloric restriction, and uncoupling protein 3 (UCP3) on mitochondrial proton leak in mice.	/pubmed/18852040	create date:2008/10/15 | first author:Asami DK	2008	C57BL/6J	N	0	Y	128	One sex	N	N	N						overexpress UCP2/3, UCP3KO & WT							0	128
752	The role of calorie restriction and SIRT1 in prion-mediated neurodegeneration.	/pubmed/18799131	create date:2008/09/19 | first author:Chen D	2008	CD1 x 129/Sv, C57Bl/6	N	4	N	0	One sex	N	N	Y						Sirt1-/- & WT							4	0
754	Insulin signaling cascade in the hearts of long-lived growth hormone receptor knockout mice: effects of calorie restriction.	/pubmed/18772466	create date:2008/09/06 | first author:Giani JF	2008	129Ola/BALB/c	N		N		One sex	N	N	Y						GHRKO & WT
757	Delayed and accelerated aging share common longevity assurance mechanisms.	/pubmed/18704162	create date:2008/08/16 | first author:Schumacher B	2008	FVB_C57BL/6J, C57BL/6J	N		N		XXXXXXX	N	Y	N						Csbm/m, Xpa-/-, Csbm/m;Xpa-/-, Ercc1-/-, Ercc1-/_-7
759	Endothelium-specific overexpression of class III deacetylase SIRT1 decreases atherosclerosis in apolipoprotein E-deficient mice.	/pubmed/18689793	create date:2008/08/12 | first author:Zhang QJ	2008	C57BL/6	Y	10	N	0	One sex	N	N	N						SIRT1-Tg/apoE-/-							10	0
760	Short-term consumption of a resveratrol-containing nutraceutical mixture mimics gene expression of long-term caloric restriction in mouse heart.	/pubmed/18657603	create date:2008/07/29 | first author:Barger JL	2008	B6C3F1	Y	40	N	0	One sex	N	N	N													40	0
762	Oral glycotoxins determine the effects of calorie restriction on oxidant stress, age-related diseases, and lifespan.	/pubmed/18599606	create date:2008/07/05 | first author:Cai W	2008	C57BL/6	Y	7	N	8	One sex	N	N	N													7	8
764	Effect of every other day feeding on mitochondrial free radical production and oxidative stress in mouse liver.	/pubmed/18593280	create date:2008/07/03 | first author:Caro P	2008	C57BL/6	Y	28	N	0	One sex	N	N	N													28	0
765	Sirtuin-mediated deacetylation pathway stabilizes Werner syndrome protein.	/pubmed/18588880	create date:2008/07/01 | first author:Kahyo T	2008	CD1 x 129/Sv, C57Bl/6	N		N		One sex	N	N	Y						Sirt1 _/_									30
766	Regulatory mechanism governing the diurnal rhythm of intestinal H+/peptide cotransporter 1 (PEPT1).	/pubmed/18583459	create date:2008/06/28 | first author:Saito H	2008	C57BL/6	Y	4	N	0	One sex	N	N	N						PPAR-_-/-							4	0
767	Effect of Ames dwarfism and caloric restriction on spontaneous DNA mutation frequency in different mouse tissues.	/pubmed/18565572	create date:2008/06/21 | first author:Garcia AM	2008	Ames dwarf	Y		N	0	One sex	N	N	N						GHRKO & WT								0
768	The orexigenic hormone ghrelin defends against depressive symptoms of chronic stress.	/pubmed/18552842	create date:2008/06/17 | first author:Lutter M	2008	C57BL6/J	Y	18	N	0	One sex	N	N	N						GHSR-/- & WT							18	0
769	Tissue-specific regulation of SIRT1 by calorie restriction.	/pubmed/18550784	create date:2008/06/14 | first author:Chen D	2008	CD1 x 129/Sv, C57Bl/6	N		N		One sex	N	N	Y						Liver-specific Sirt1-/- & WT									40
773	A low dose of dietary resveratrol partially mimics caloric restriction and retards aging parameters in mice.	/pubmed/18523577	create date:2008/06/05 | first author:Barger JL	2008	C57BL/6_C3H/He	Y	34	N	0	One sex	N	N	N													34	0
774	Effects of aging and calorie restriction on the global gene expression profiles of mouse testis and ovary.	/pubmed/18522719	create date:2008/06/05 | first author:Sharov AA	2008	C57BL/6	N	118	N	18	XXXXXXX	N	Y	N													118	18
775	Effect of severe calorie restriction on the lung in two strains of mice.	/pubmed/18515406	create date:2008/06/03 | first author:Bishai JM	2008	C57BL/6, C3H/HeJ	Y	46	N	0	One sex	N	N	N													46	0
776	Differential effects of energy stress on AMPK phosphorylation and apoptosis in experimental brain tumor and normal brain.	/pubmed/18474106	create date:2008/05/14 | first author:Mukherjee P	2008	C57BL/6J	Y		N	0	One sex	N	N	N														0
777	Differential expression of hypothalamic CART mRNA in response to body weight change following different dietary interventions.	/pubmed/18455834	create date:2008/05/06 | first author:Yu Y	2008	C57Bl/6J	Y	45	N	0	One sex	N	N	N													45	0
778	Low-carbohydrate diet versus caloric restriction: effects on weight loss, hormones, and colon tumor growth in obese mice.	/pubmed/18444137	create date:2008/04/30 | first author:Wheatley KE	2008	C57BL/6	Y	8	N	0	One sex	N	N	N													8	0
779	Caloric restriction decreases cortical bone mass but spares trabecular bone in the mouse skeleton: implications for the regulation of bone mass by body weight.	/pubmed/18435579	create date:2008/04/26 | first author:Hamrick MW	2008	C57BL/6	Y	20	N	0	One sex	N	N	N													20	0
780	Enzymes of glycerol and glyceraldehyde metabolism in mouse liver: effects of caloric restriction and age on activities.	/pubmed/18429748	create date:2008/04/24 | first author:Hagopian K	2008	C57Bl/6J	Y		N	0	One sex	N	N	N														0
781	Effects of a novel Y5 antagonist in obese mice: combination with food restriction or sibutramine.	/pubmed/18421274	create date:2008/04/19 | first author:Mashiko S	2008	C57BL/6N	Y		N	0	One sex	N	N	N						Npy5r-/-								0
783	Egr-1 and Hipk2 are required for the TrkA to p75(NTR) switch that occurs downstream of IGF1-R.	/pubmed/18378044	create date:2008/04/02 | first author:Li H	2008	ICR	N		N		One sex	N	N	Y
786	Orexin signaling mediates the antidepressant-like effect of calorie restriction.	/pubmed/18354010	create date:2008/03/21 | first author:Lutter M	2008	C57BL/6	N	22	N	27	XXXXXXX	N	Y	N						Orexin-/- & WT							22	27
787	Entrainment of temperature and activity rhythms to restricted feeding in orexin knock out mice.	/pubmed/18343358	create date:2008/03/18 | first author:Kaur S	2008	C57BL/6	N	9	N	9	XXXXXXX	N	Y	N						Orexin-/- & WT							9	9
788	Different types of nutritional deficiencies affect different domains of spatial memory function checked in a radial arm maze.	/pubmed/18329816	create date:2008/03/11 | first author:Ranade SC	2008	Swiss	N		Y	0	One sex	N	N	N														0
789	Effect of exercise and calorie restriction on biomarkers of aging in mice.	/pubmed/18321952	create date:2008/03/07 | first author:Huffman DM	2008	C57BL/6	Y	82	N	0	One sex	N	N	N													82	0
790	Manipulation of caloric content but not diet composition, attenuates the deficit in learning and memory of senescence-accelerated mouse strain P8.	/pubmed/18316167	create date:2008/03/05 | first author:Komatsu T	2008	AKR/J	Y		N	0	One sex	N	N	N						SAMP8/Ta								0
791	Calorie restriction alters physical performance but not cognition in two models of altered neuroendocrine signaling.	/pubmed/18291538	create date:2008/02/23 | first author:Minor RK	2008	129S1/SvImJ, C57BL/6J	Y	80	N	0	One sex	N	N	N						NPY-/-							80	0
792	Nrf2 mediates cancer protection but not prolongevity induced by caloric restriction.	/pubmed/18287083	create date:2008/02/22 | first author:Pearson KJ	2008	ICR	Y	62	N	60	One sex	N	N	N						Nrf2-/-							62	60
793	Vagal tone dominates autonomic control of mouse heart rate at thermoneutrality.	/pubmed/18245567	create date:2008/02/05 | first author:Swoap SJ	2008	C57Bl/6J	Y	47	N	0	One sex	N	N	N						M2R-/-							47	0
795	Modified alternate-day fasting regimens reduce cell proliferation rates to a similar extent as daily calorie restriction in mice.	/pubmed/18184721	create date:2008/01/11 | first author:Varady KA	2008	C57BL/6J	N	0	Y	30	One sex	N	N	N													0	30
797	Downregulation of plasma insulin levels and hepatic PPARgamma expression during the first week of caloric restriction in mice.	/pubmed/18053669	create date:2007/12/07 | first author:Mulligan JD	2007	C57Bl/6	Y	36	N	0	One sex	N	N	N													36	0
799	Dynamic regulation of PGC-1alpha localization and turnover implicates mitochondrial adaptation in calorie restriction and the stress response.	/pubmed/18031569	create date:2007/11/23 | first author:Anderson RM	2007	C57B16	Y		N	0	One sex	N	N	N														0
800	Characterization of adult ghrelin and ghrelin receptor knockout mice under positive and negative energy balance.	/pubmed/18006636	create date:2007/11/17 | first author:Sun Y	2007	C57BL/6J	Y	8	N	0	One sex	N	N	N						ghrelin-/-, Ghsr-/-, & WT							8	0
801	Forebrain oscillators ticking with different clock hands.	/pubmed/17996461	create date:2007/11/13 | first author:Feillet CA	2007	C57BL/6_129SvEvBrd, CH3	Y	45	N	0	One sex	N	N	N						Per1-/-, Per2Brdm1, & WT							45	0
802	Life-long caloric restriction reveals biphasic and dimorphic effects on bone metabolism in rodents.	/pubmed/17991723	create date:2007/11/10 | first author:Tatsumi S	2007	C57BL/6J	Y		N	0	One sex	N	N	N														0
803	Hunger does not diminish over time in mice under protracted caloric restriction.	/pubmed/17990972	create date:2007/11/10 | first author:Hambly C	2007	MF1	N		N		One sex	N	N	Y															50
804	Chronic calorie restriction increases susceptibility of laboratory mice (Mus musculus) to a primary intestinal parasite infection.	/pubmed/17973970	create date:2007/11/02 | first author:Kristan DM	2007	C57BL/6	N	30	N	27	XXXXXXX	N	Y	N													30	27
805	Inhibition of retinoic acid-induced skin irritation in calorie-restricted mice.	/pubmed/17968574	create date:2007/10/31 | first author:Varani J	2007	UM-HET3	N		N		One sex	N	N	Y
807	Late onset of dietary restriction reverses age-related decline of malate-aspartate shuttle enzymes in the liver and kidney of mice.	/pubmed/17932783	create date:2007/10/13 | first author:Goyary D	2007	Balb/C	Y		N	0	One sex	N	N	N						ADF								0
808	Plasma glucose and the action of calorie restriction on aging.	/pubmed/17921417	create date:2007/10/09 | first author:McCarter R	2007	C57BL/6	Y		N		One sex	N	N	N						hGLUT4 & WT									440
809	Caloric restriction increases learning consolidation and facilitates synaptic plasticity through mechanisms dependent on NR2B subunits of the NMDA receptor.	/pubmed/17881524	create date:2007/09/21 | first author:Fontán-Lozano A	2007	Swiss	Y	30	N	0	One sex	N	N	N						ADF							30	0
811	Chronic caloric restriction induces forestomach hypertrophy with enhanced ghrelin levels during aging.	/pubmed/17875344	create date:2007/09/19 | first author:Yang H	2007	C57/B6	N	0	Y	40	One sex	N	N	N													0	40
812	Effect of long-term caloric restriction on oxygen consumption and body temperature in two different strains of mice.	/pubmed/17822741	create date:2007/09/08 | first author:Ferguson M	2007	DBA/2, C57BL/6	Y		N	0	One sex	N	N	N														0
813	Mild calorie restriction does not affect testosterone levels and testicular gene expression in mutant mice.	/pubmed/17720951	create date:2007/08/28 | first author:Rocha JS	2007	Ames dwarf	Y	150	N	0	One sex	N	N	N						GHR-KO & WT; PEPCK-bGH & WT							150	0
814	Calorie-restricted mice that gorge show less ability to compensate for reduced energy intake.	/pubmed/17706730	create date:2007/08/21 | first author:Hambly C	2007	MF1	N	0	Y	60	One sex	N	N	N													0	60
815	Physiological genetics of dietary restriction: uncoupling the body temperature and body weight responses.	/pubmed/17686887	create date:2007/08/10 | first author:Rikke BA	2007	LXS and LSXSS	N	0	Y		One sex	N	N	N						LXS and LSXSS							0
816	Effects of dietary calorie restriction or exercise on the PI3K and Ras signaling pathways in the skin of mice.	/pubmed/17646168	create date:2007/07/25 | first author:Xie L	2007	SENCAR	N	0	Y		One sex	N	N	N													0
817	Circadian and photic regulation of clock and clock-controlled proteins in the suprachiasmatic nuclei of calorie-restricted mice.	/pubmed/17610588	create date:2007/07/06 | first author:Mendoza J	2007	C3H	Y	58	N	0	One sex	N	N	N													58	0
818	Effects of modified alternate-day fasting regimens on adipocyte size, triglyceride metabolism, and plasma adiponectin levels in mice.	/pubmed/17607017	create date:2007/07/04 | first author:Varady KA	2007	C57BL/6J	Y	24	N	0	One sex	N	N	N						ADF							24	0
819	Carbohydrate versus energy restriction: effects on weight loss, body composition and metabolism.	/pubmed/17587795	create date:2007/06/26 | first author:Williams EA	2007	C57BL/6	Y	100	N	0	One sex	N	N	N													100	0
820	Hyperphagia-mediated obesity in transgenic mice misexpressing the RNA-editing enzyme ADAR2.	/pubmed/17567573	create date:2007/06/15 | first author:Singh M	2007	C57Bl/6J x DBA2	N		N		XXXXXXX	N	Y	N						ADAR2b-hGH & WT
822	SIRT2 deacetylates FOXO3a in response to oxidative stress and caloric restriction.	/pubmed/17521387	create date:2007/05/25 | first author:Wang F	2007	C57BL/6	Y		N	0	One sex	N	N	N														0
823	Calorie restriction ameliorates neurodegenerative phenotypes in forebrain-specific presenilin-1 and presenilin-2 double knockout mice.	/pubmed/17499883	create date:2007/05/15 | first author:Wu P	2007	B6CBA	N		N	0	XXXXXXX	Y	N	N						cDKO & WT								0
824	Transcriptome analysis of age-, gender- and diet-associated changes in murine thymus.	/pubmed/17499630	create date:2007/05/15 | first author:Lustig A	2007	C57BL/6	N	32	N	35	XXXXXXX	N	Y	N													32	35
825	Dose effects of modified alternate-day fasting regimens on in vivo cell proliferation and plasma insulin-like growth factor-1 in mice.	/pubmed/17495119	create date:2007/05/15 | first author:Varady KA	2007	C57BL/6J	Y	24	N	0	One sex	N	N	N						ADF							24	0
826	Exercise improves memory acquisition and retrieval in the Y-maze task: relationship with hippocampal neurogenesis.	/pubmed/17469921	create date:2007/05/02 | first author:Van der Borght K	2007	C57BL/6	Y	80	N	0	One sex	N	N	N													80	0
827	Sexually dimorphic responses to fat loss after caloric restriction or surgical lipectomy.	/pubmed/17426110	create date:2007/04/12 | first author:Shi H	2007	FVBN	N	30	N	30	XXXXXXX	N	Y	N													30	30
829	Different gene expression of skin tissues between mice with weight controlled by either calorie restriction or physical exercise.	/pubmed/17392482	create date:2007/03/30 | first author:Lu J	2007	SENCAR	N	0	Y	52	One sex	N	N	N													0	52
830	Nutritional regulation of adipose tissue apolipoprotein E expression.	/pubmed/17389709	create date:2007/03/29 | first author:Huang ZH	2007	C57BL/6	N	28	N		One sex	N	N	Y						ob/ob							28
831	Implications of hemopoietic progenitor cell kinetics and experimental leukemogenesis: Relevance to Gompertzean mortality as possible hematotoxicological endpoint.	/pubmed/17379097	create date:2007/03/24 | first author:Hirabayashi Y	2007	C3H/He & C57BL/6	N		N		XXXXXXX	Y	N	N						p53-/- & WT
832	Effects of mild calorie restriction on reproduction, plasma parameters and hepatic gene expression in mice with altered GH/IGF-I axis.	/pubmed/17376513	create date:2007/03/23 | first author:Rocha JS	2007	C57BL/6 _ C3H	N		N		XXXXXXX	N	Y	N						df/df, GHR-KO, PEPCK bGH, & WT
833	Adipocytokines and the regulation of lipid metabolism in growth hormone transgenic and calorie-restricted mice.	/pubmed/17347312	create date:2007/03/10 | first author:Wang Z	2007	C57BL/6 x C3H	Y		N	0	One sex	N	N	N						GH-tg, & WT								0
835	Intermittent fasting and caloric restriction ameliorate age-related behavioral deficits in the triple-transgenic mouse model of Alzheimer's disease.	/pubmed/17306982	create date:2007/02/20 | first author:Halagappa VK	2007	C57BL/6	N		N		XXXXXXX	Y	N	N						3xTgAD
836	Effects of caloric restriction and growth hormone resistance on insulin-related intermediates in the skeletal muscle.	/pubmed/17301033	create date:2007/02/16 | first author:Al-Regaiey KA	2007	129Ola/BALB/c	Y		N		One sex	N	N	N						GHR-KO & WT
837	A high-fat, ketogenic diet induces a unique metabolic state in mice.	/pubmed/17299079	create date:2007/02/15 | first author:Kennedy AR	2007	C57BL/6	Y	66	N	0	One sex	N	N	N													66	0
840	Reduced-energy diet improves survival of obese KKAy mice with viral myocarditis: induction of cardiac adiponectin expression.	/pubmed/17275107	create date:2007/02/06 | first author:Kanda T	2007	C57BL/6	N	0	Y	20	One sex	N	N	N						KKAy							0	20
841	Rapid onset of gene expression in lung, supportive of formation of alveolar septa, induced by refeeding mice after calorie restriction.	/pubmed/17237152	create date:2007/01/24 | first author:Massaro D	2007	C57BL/6J	Y	32	N	0	One sex	N	N	N													32	0
842	Role of CYP2E1 and saturation kinetics in the bioactivation of thioacetamide: Effects of diet restriction and phenobarbital.	/pubmed/17234228	create date:2007/01/20 | first author:Chilakapati J	2007	129SV	Y		N	0	One sex	N	N	N						cyp2e1 & WT								0
843	Dramatic accumulation of triglycerides and precipitation of cardiac hemodynamic dysfunction during brief caloric restriction in transgenic myocardium expressing human calcium-independent phospholipase A2gamma.	/pubmed/17213206	create date:2007/01/11 | first author:Mancuso DJ	2007	B6CBAF1/J	N	0	N	3	One sex	N	N	Y						hiPLA2e_ & WT							0	3
844	High-cholesterol feeding aggravates cerebral infarction via decreasing the CB1 receptor.	/pubmed/17208374	create date:2007/01/09 | first author:Hayakawa K	2007	ICR	Y	21	N	0	One sex	N	N	N													21	0
846	Insulin-like growth factor-1 receptor immunoreactive cells are selectively maintained in the paraventricular hypothalamus of calorically restricted mice.	/pubmed/17194562	create date:2006/12/30 | first author:Saeed O	2006	B6D2F1	N	0	Y	15	One sex	N	N	N													0	15
848	Adaptive stress response in segmental progeria resembles long-lived dwarfism and calorie restriction in mice.	/pubmed/17173483	create date:2006/12/19 | first author:van de Ven M	2006	129Olaj C57BL/6j FVB	N		N		One sex	N	N	Y						Xpa-/-, XpdTTD (XPDR722W) and XpdXPCS (XPDG602D) & WT
852	Effects of age and caloric intake on glutathione redox state in different brain regions of C57BL/6 and DBA/2 mice.	/pubmed/17113050	create date:2006/11/23 | first author:Rebrin I	2006	C57BL/6JNia, DBA/2JNia	Y	55	N	0	One sex	N	N	N													55	0
853	Tissue specific and non-specific changes in gene expression by aging and by early stage CR.	/pubmed/17092546	create date:2006/11/10 | first author:Fu C	2006	C57BL/6	Y	18	N	0	One sex	N	N	N						Transcriptomics							18	0
855	Does caloric restriction extend life in wild mice?	/pubmed/17054664	create date:2006/10/24 | first author:Harper JM	2006	Wild house mouse	Y		N		One sex	N	N	N
856	Age-dependent loss of insulin-like growth factor-1 receptor immunoreactive cells in the supraoptic hypothalamus is reduced in calorically restricted mice.	/pubmed/17034982	create date:2006/10/13 | first author:Yaghmaie F	2006	B6D2F1	N	0	Y		One sex	N	N	N													0
857	Daily restricted feeding resets the circadian clock in the suprachiasmatic nucleus of CS mice.	/pubmed/16990494	create date:2006/09/23 | first author:Abe H	2006	CS, C57BL/6J	N	NA	N	NA	XXXXXXX	Y	N	N						Both male and female mice were used because of an insufficient number of male mice							NA	NA	90
859	Inhibition of inflammatory response in transgenic fat-1 mice on a calorie-restricted diet.	/pubmed/16962071	create date:2006/09/12 | first author:Bhattacharya A	2006	C57BL/6	N	NA	N	NA	One sex	N	N	Y						Fat-1-/-, WT							NA	NA	15
860	SIRT4 inhibits glutamate dehydrogenase and opposes the effects of calorie restriction in pancreatic beta cells.	/pubmed/16959573	create date:2006/09/09 | first author:Haigis MC	2006	C57BL/6	N		N		One sex	N	N	Y
861	Dietary restriction and triiodothyronine (T3) regulation of malate-aspartate shuttle enzymes in the liver and kidney of mice.	/pubmed/16955734	create date:2006/09/08 | first author:Goyary D	2006	Balb/c	Y	14	N	0	One sex	N	N	N						ADF							14	0
862	Transient caloric restriction in early adulthood hastens disease endpoint in male, but not female, Cu/Zn-SOD mutant G93A mice.	/pubmed/16941656	create date:2006/08/31 | first author:Hamadeh MJ	2006	B6SJL	N	16	N	16	XXXXXXX	N	Y	N						TgN(SOD1_G93A), reports sex difference							16	16
863	Leptin contributes to slower weight gain in juvenile rodents on a ketogenic diet.	/pubmed/16940251	create date:2006/08/31 | first author:Thio LL	2006	C57BL/6J, C57BLKS/J	Y	14	N	0	One sex	N	N	N						db/db, ob/ob, WT							14	0
864	Calorie restriction in mice: effects on body composition, daily activity, metabolic rate, mitochondrial reactive oxygen species production, and membrane fatty acid composition.	/pubmed/16912094	create date:2006/08/17 | first author:Faulks SC	2006	QS	Y	24	N	0	One sex	N	N	N													24	0
865	Caloric restriction suppresses apoptotic cell death in the mammalian cochlea and leads to prevention of presbycusis.	/pubmed/16890326	create date:2006/08/08 | first author:Someya S	2006	C57BL/6	Y		N	0	One sex	N	N	N														0
866	Coordinated multitissue transcriptional and plasma metabonomic profiles following acute caloric restriction in mice.	/pubmed/16882887	create date:2006/08/03 | first author:Selman C	2006	C57BL/6	Y	20	N	0	One sex	N	N	N						Transcriptomics							20	0
867	Adipose gene expression response of lean and obese mice to short-term dietary restriction.	/pubmed/16861601	create date:2006/07/25 | first author:van Schothorst EM	2006	C57Bl6/J	N	0	Y	18	One sex	N	N	N													0	18
868	Murine weight loss exhibits significant genetic variation during dietary restriction.	/pubmed/16849633	create date:2006/07/20 | first author:Rikke BA	2006	ILS, ISS, 129S6, A, BALB/c, C57BL/6, C3H, DBA, LSXSS	N		Y		One sex	N	N	N
870	Effect of dietary restriction on learning and memory impairment and histologic alterations of brain stem in senescence-accelerated mouse (SAM) P8 strain.	/pubmed/16804016	create date:2006/06/29 | first author:Takahashi R	2006	AKR/J	Y	NA	N	0	One sex	N	N	N						SAMP8, SAMR1							NA	0
873	Neuronal SIRT1 activation as a novel mechanism underlying the prevention of Alzheimer disease amyloid neuropathology by calorie restriction.	/pubmed/16751189	create date:2006/06/06 | first author:Qin W	2006	Swiss Webster X C57B6/DBA2	N	0	Y	8	One sex	N	N	N						Tg2576							0	8
876	The effect of exercise training on adiponectin receptor expression in KKAy obese/diabetic mice.	/pubmed/16731794	create date:2006/05/30 | first author:Huang H	2006	C57BL/6	Y	18	N	0	One sex	N	N	N						KKAy							18	0
877	Stress resistance and aging: influence of genes and nutrition.	/pubmed/16713617	create date:2006/05/23 | first author:Harper JM	2006	BALB/cJ _ C57BL/6J	N		Y		One sex	N	N	N
878	Caloric restriction in C57BL/6J mice mimics therapeutic fasting in humans.	/pubmed/16709251	create date:2006/05/20 | first author:Mahoney LB	2006	C57BL/6J	N	0	Y	12	One sex	N	N	N													0	12
879	Targeted disruption of growth hormone receptor interferes with the beneficial actions of calorie restriction.	/pubmed/16682650	create date:2006/05/10 | first author:Bonkowski MS	2006	129Ola/BALB/c	N		N		XXXXXXX	N	Y	N						GHR-KO & WT
881	Adipocytokines and lipid levels in Ames dwarf and calorie-restricted mice.	/pubmed/16611697	create date:2006/04/14 | first author:Wang Z	2006	C57BL/6 _ C3H	Y	31	N	0	One sex	N	N	N						df/df, & WT							31	0
883	Gene expression and physiologic responses of the heart to the initiation and withdrawal of caloric restriction.	/pubmed/16567370	create date:2006/03/29 | first author:Dhahbi JM	2006	B6C3F1	Y	4	N	0	One sex	N	N	N													4	0
885	Caloric restriction prevents radiation-induced myeloid leukemia in C3H/HeMs mice and inversely increases incidence of tumor-free death: implications in changes in number of hemopoietic progenitor cells.	/pubmed/16543061	create date:2006/03/18 | first author:Yoshida K	2006	C3H/HeMs	Y	1400	N	0	One sex	N	N	N													1400	0
887	Caloric restriction and growth hormone receptor knockout: effects on expression of genes involved in insulin action in the heart.	/pubmed/16524678	create date:2006/03/10 | first author:Masternak MM	2006	129Ola/BALB/c	Y	31	N	0	One sex	N	N	N						GHR-KO, hGH-tg, & WT							31	0
888	Influence of caloric restriction on motor behavior, longevity, and brain lipid composition in Sandhoff disease mice.	/pubmed/16521125	create date:2006/03/08 | first author:Denny CA	2006	129S	N		N		One sex	N	N	Y						Hexb+/+, Hexb+/-, and Hexb-/-									14
889	Exploratory investigation of the effect of melatonin and caloric restriction on the temporal expression of murine hypothalamic transcripts.	/pubmed/16503923	create date:2006/03/01 | first author:Resuehr D	2006	B6C3F1	Y	80	N	0	One sex	N	N	N													80	0
890	Anti-inflammatory action of dietary fish oil and calorie restriction.	/pubmed/16438990	create date:2006/01/28 | first author:Kim YJ	2006	NZB x NZW	N	0	Y		One sex	N	N	N													0
891	Housing density does not influence the longevity effect of calorie restriction.	/pubmed/16424282	create date:2006/01/21 | first author:Ikeno Y	2006	C57BL/6J	Y	126	N	0	One sex	N	N	N													126	0
892	Energy restriction lowers the expression of genes linked to inflammation, the cytoskeleton, the extracellular matrix, and angiogenesis in mouse adipose tissue.	/pubmed/16424110	create date:2006/01/21 | first author:Higami Y	2006	C57Bl6	Y		N	0	One sex	N	N	N														0
893	Effects of three simultaneous demands on glucose transport, resting metabolism and morphology of laboratory mice.	/pubmed/16416287	create date:2006/01/18 | first author:Kristan DM	2006	Swiss-Webster	N	0	Y	20	One sex	N	N	N						Because the effects of H. polygyrus can vary with sex, we used only females.							0	20
895	Polyunsaturated fatty acids of marine origin induce adiponectin in mice fed a high-fat diet.	/pubmed/16397791	create date:2006/01/07 | first author:Flachs P	2006	C57BL/6J	Y	10	N	0	One sex	N	N	N													10	0
898	Increase in activity during calorie restriction requires Sirt1.	/pubmed/16339438	create date:2005/12/13 | first author:Chen D	2005	CD1 x 129/Sv, C57Bl/6	N		N		One sex	N	N	Y						Sirt1-/- & WT
899	Effects of caloric restriction and growth hormone resistance on the expression level of peroxisome proliferator-activated receptors superfamily in liver of normal and long-lived growth hormone receptor/binding protein knockout mice.	/pubmed/16339324	create date:2005/12/13 | first author:Masternak MM	2005	129Ola/BALB/c	Y	32	N	0	One sex	N	N	N						GHR-KO & WT							32	0
900	Short-term caloric restriction does not modify the in vivo insulin signaling pathway leading to Akt activation in skeletal muscle of Ames dwarf (Prop1(df)/Prop1(df)) mice.	/pubmed/16308835	create date:2005/11/26 | first author:Argentino DP	2005	C57BL/6 _ C3H	N	40	Y	0	One sex	N	N	N						df/df & WT							40	0
901	Caloric restriction results in decreased expression of peroxisome proliferator-activated receptor superfamily in muscle of normal and long-lived growth hormone receptor/binding protein knockout mice.	/pubmed/16282554	create date:2005/11/12 | first author:Masternak MM	2005	129Ola/BALB/c	Y	32	N	0	One sex	N	N	N						GHR-KO & WT							32	0
902	Calorie restriction promotes mitochondrial biogenesis by inducing the expression of eNOS.	/pubmed/16224023	create date:2005/10/15 | first author:Nisoli E	2005	NA	Y	20	N	0	One sex	N	N	N													20	0
903	Contribution of different mechanisms to compensation for energy restriction in the mouse.	/pubmed/16222057	create date:2005/10/14 | first author:Hambly C	2005	MF1	Y	50	N	0	One sex	N	N	N													50	0
904	Identification of potential caloric restriction mimetics by microarray profiling.	/pubmed/16189280	create date:2005/09/29 | first author:Dhahbi JM	2005	B6C3F1	Y	8	N	0	One sex	N	N	N													8	0
905	Macrosialin increases during normal brain aging are attenuated by caloric restriction.	/pubmed/16157452	create date:2005/09/15 | first author:Wong AM	2005	C57BL/6NNia	Y		N	0	One sex	N	N	N														0
907	Long-lived alphaMUPA transgenic mice show reduced SOD2 expression, enhanced apoptosis and reduced susceptibility to the carcinogen dimethylhydrazine.	/pubmed/16139868	create date:2005/09/06 | first author:Tirosh O	2005	FVB/N	N	20	Y	0	One sex	N	N	N						_MUPA & WT							20	0
909	Accelerated aging pathology in ad libitum fed Xpd(TTD) mice is accompanied by features suggestive of caloric restriction.	/pubmed/16115803	create date:2005/08/24 | first author:Wijnhoven SW	2005	C57BL/6	N	0	Y	75	One sex	N	N	N						XpdTTD & WT; results from male XpdTTD and C57BL/6 mice were comparable to those from females							0	75
910	Effects of caloric restriction on insulin pathway gene expression in the skeletal muscle and liver of normal and long-lived GHR-KO mice.	/pubmed/16054319	create date:2005/08/02 | first author:Masternak MM	2005	129Ola/BALB/c	Y	32	N	0	One sex	N	N	N						GHR-KO							32	0
911	Roles for leptin receptor/STAT3-dependent and -independent signals in the regulation of glucose homeostasis.	/pubmed/16054060	create date:2005/08/02 | first author:Bates SH	2005	C57Bl/6;129	Y		N	0	One sex	N	N	N						s/s, ob/ob, WT								0
912	Early hypothalamic response to age-dependent gene expression by calorie restriction.	/pubmed/16051397	create date:2005/07/30 | first author:Fu C	2005	C57BL/6	Y	72	N	0	One sex	N	N	N						GLUT4-TG							72	0
913	Phenotypic effects of calorie restriction and insulin-like growth factor-1 treatment on body composition and bone mineral density of C57BL/6 mice: implications for cancer prevention.	/pubmed/15999532	create date:2005/07/08 | first author:Berrigan D	2005	C57BL/6NCr	N	0	Y	45	One sex	N	N	N													0	45
915	Caloric restriction reduces cell loss and maintains estrogen receptor-alpha immunoreactivity in the pre-optic hypothalamus of female B6D2F1 mice.	/pubmed/15990721	create date:2005/07/02 | first author:Yaghmaie F	2005	B6D2F1	N	0	Y		One sex	N	N	N													0
916	Caloric restriction decreases survival of aged mice in response to primary influenza infection.	/pubmed/15983169	create date:2005/06/29 | first author:Gardner EM	2005	B6	Y	15	N	0	One sex	N	N	N													15	0
917	Chronic food restriction enhances memory in mice--analysis with matched drive levels.	/pubmed/15973161	create date:2005/06/24 | first author:Hashimoto T	2005	C57BL/6L	Y	30	N	0	One sex	N	N	N													30	0
918	A TrkA-to-p75NTR molecular switch activates amyloid beta-peptide generation during aging.	/pubmed/15966860	create date:2005/06/22 | first author:Costantini C	2005	C57Bl6	Y		N	0	One sex	N	N	N														0
920	Caloric restriction and melatonin substitution: effects on murine circadian parameters.	/pubmed/15913571	create date:2005/05/26 | first author:Resuehr D	2005	B6C3F1	N		N		One sex	N	N	Y															100
924	Serine utilization in mouse liver: influence of caloric restriction and aging.	/pubmed/15792811	create date:2005/03/29 | first author:Hagopian K	2005	C57BL/6J	Y		N	0	One sex	N	N	N														0
925	Analgesic effects of dietary caloric restriction in adult mice.	/pubmed/15777870	create date:2005/03/22 | first author:Hargraves WA	2005	C57BL/6, DBA/1	Y	66	N	0	One sex	N	N	N													66	0
927	Caloric restriction attenuates Abeta-deposition in Alzheimer transgenic models.	/pubmed/15748777	create date:2005/03/08 | first author:Patel NV	2005	J20	Y		N	0	One sex	N	N	N						APPswe/ind								0
929	Effects of long-term caloric restriction on early steps of the insulin-signaling system in mouse skeletal muscle.	/pubmed/15741279	create date:2005/03/03 | first author:Argentino DP	2005	(129 Ola x BALB/c ) x (C57BL/g _ C3H)	N	0	Y		One sex	N	N	N													0
932	Effects of long-term caloric restriction on glucose homeostasis and on the first steps of the insulin signaling system in skeletal muscle of normal and Ames dwarf (Prop1df/Prop1df) mice.	/pubmed/15664729	create date:2005/01/25 | first author:Argentino DP	2005	C57BL/6 _ C3H	N	0	Y	24	One sex	N	N	N						df/df & WT							0	24
933	SIRT3, a mitochondrial sirtuin deacetylase, regulates mitochondrial function and thermogenesis in brown adipocytes.	/pubmed/15653680	create date:2005/01/18 | first author:Shi T	2005	C57BL/6	Y		N	0	One sex	N	N	N														0
934	Fructose metabolizing enzymes from mouse liver: influence of age and caloric restriction.	/pubmed/15652177	create date:2005/01/18 | first author:Hagopian K	2005	C57BL/6J	Y		N	0	One sex	N	N	N														0
935	Caloric restriction attenuates beta-amyloid neuropathology in a mouse model of Alzheimer's disease.	/pubmed/15650008	create date:2005/01/15 | first author:Wang J	2005	Swiss Webster X C57B6/DBA2	N		Y		One sex	N	N	N						Tg2576									12
936	Caloric restriction transiently improves motor performance but hastens clinical onset of disease in the Cu/Zn-superoxide dismutase mutant G93A mouse.	/pubmed/15625688	create date:2004/12/31 | first author:Hamadeh MJ	2004	B6SJL	N	3	N	11	XXXXXXX	Y	N	N						SOD1_/-							3	11
937	Effects of caloric restriction on cell proliferation in several tissues in mice: role of intermittent feeding.	/pubmed/15613681	create date:2004/12/23 | first author:Hsieh EA	2004	C57BL/6J	N	24	Y	0	One sex	N	N	N													24	0
938	The ageing phenome: caloric restriction and hormones promote neural cell survival, growth, and de-differentiation.	/pubmed/15610756	create date:2004/12/22 | first author:Timiras PS	2004	B6D2F1	N		Y	0	One sex	N	N	N														0
939	SAS programs for real-time RT-PCR having multiple independent samples.	/pubmed/15597549	create date:2004/12/16 | first author:Cook P	2004	NA	Y		N	0	One sex	N	N	N														0
941	Ink4a/Arf expression is a biomarker of aging.	/pubmed/15520862	create date:2004/11/03 | first author:Krishnamurthy J	2004	C57BL/6	N	9	N	9	XXXXXXX	Y	N	N													9	9
942	Effects of yo-yo diet, caloric restriction, and olestra on tissue distribution of hexachlorobenzene.	/pubmed/15513954	create date:2004/10/30 | first author:Jandacek RJ	2004	C57BL/6	Y		N	0	One sex	N	N	N														0
943	Long-lived growth hormone receptor knockout mice: interaction of reduced insulin-like growth factor i/insulin signaling and caloric restriction.	/pubmed/15498882	create date:2004/10/23 | first author:Al-Regaiey KA	2004	129Ola/BALB/c	Y	36	N	0	One sex	N	N	N						GHR-KO, hGH-tg, & WT							36	0
944	Insulin receptor substrate 2 plays a crucial role in beta cells and the hypothalamus.	/pubmed/15467830	create date:2004/10/07 | first author:Kubota N	2004	129/Sv x C57Bl/6	Y	9	N	0	One sex	N	N	N						_HT-IRS2 & WT							9	0
947	Divergent effects of caloric restriction on gene expression in normal and long-lived mice.	/pubmed/15345726	create date:2004/09/04 | first author:Masternak MM	2004	C57BL/6 _ C3H	Y	25	N	0	One sex	N	N	N						df/df & WT							25	0
948	Identification of genes contributing to the obese yellow Avy phenotype: caloric restriction, genotype, diet x genotype interactions.	/pubmed/15306695	create date:2004/08/13 | first author:Kaput J	2004	BALB/cStCrlfC3H/Nctr x VYWffC3Hf/Nctr-Avy/a	N	0	Y	104	One sex	N	N	N						Avy/A, A/a							0	104
949	Dynamics of keratinocytes in vivo using HO labeling: a sensitive marker of epidermal proliferation state.	/pubmed/15304093	create date:2004/08/12 | first author:Hsieh EA	2004	C57BL/6J	N	0	Y	33	One sex	N	N	N													0	33
950	Mimetics of caloric restriction include agonists of lipid-activated nuclear receptors.	/pubmed/15302862	create date:2004/08/11 | first author:Corton JC	2004	SV129, B6C3F1	N		N	0	One sex	N	N	Y														0
951	Krebs cycle enzymes from livers of old mice are differentially regulated by caloric restriction.	/pubmed/15288689	create date:2004/08/04 | first author:Hagopian K	2004	C57BL/6J	Y	14	N	0	One sex	N	N	N													14	0
952	Metabolic adaptations to fasting and chronic caloric restriction in heart, muscle, and liver do not include changes in AMPK activity.	/pubmed/15251868	create date:2004/07/15 | first author:Gonzalez AA	2004	C57Bl/6J	Y	34	N	0	One sex	N	N	N													34	0
957	Regulation of immune function by calorie restriction and cyclophosphamide treatment in lupus-prone NZB/NZW F1 mice.	/pubmed/15203320	create date:2004/06/19 | first author:Sun D	2004	NZB/NZW	N		Y	0	One sex	N	N	N														0
958	Hypotension and bradycardia during caloric restriction in mice are independent of salt balance and do not require ANP receptor.	/pubmed/15191892	create date:2004/06/12 | first author:Hunt LM	2004	c57/Bl	N	21	Y	0	One sex	N	N	N						NPR1-/-, NPR3-/-							21	0
959	Sirt1 promotes fat mobilization in white adipocytes by repressing PPAR-gamma.	/pubmed/15175761	create date:2004/06/04 | first author:Picard F	2004	FVB	Y	22	N	0	One sex	N	N	N						Sirt1+/- & WT							22	0
960	Impact of age and caloric restriction on neurogenesis in the dentate gyrus of C57BL/6 mice.	/pubmed/15123339	create date:2004/05/05 | first author:Bondolfi L	2004	C57BL/6	Y	61	N	0	One sex	N	N	N													61	0
962	Food restriction attenuates age-related increase in the sensitivity of endothelial cells to oxidized lipids.	/pubmed/15071074	create date:2004/04/09 | first author:Yang H	2004	C57BL	Y		N	0	One sex	N	N	N														0
964	The impact of alpha-lipoic acid, coenzyme Q10 and caloric restriction on life span and gene expression patterns in mice.	/pubmed/15059645	create date:2004/04/03 | first author:Lee CK	2004	C57BL/6 x C3H	Y	231	N	0	One sex	N	N	N													231	0
967	Temporal linkage between the phenotypic and genomic responses to caloric restriction.	/pubmed/15044709	create date:2004/03/27 | first author:Dhahbi JM	2004	B6C3F1	Y	21	N	0	One sex	N	N	N						Transcriptomics							21	0
968	Additive regulation of hepatic gene expression by dwarfism and caloric restriction.	/pubmed/15039484	create date:2004/03/25 | first author:Tsuchiya T	2004	C57BL/6 _ C3H	N	32	Y	0	One sex	N	N	N						df/df & WT							32	0
969	Mice with deletion of the mitochondrial glycerol-3-phosphate dehydrogenase gene exhibit a thrifty phenotype: effect of gender.	/pubmed/15031134	create date:2004/03/20 | first author:Alfadda A	2004	C57Bl	N		N		XXXXXXX	N	Y	N						mGDP-/- & WT
970	Both insulin signaling defects in the liver and obesity contribute to insulin resistance and cause diabetes in Irs2(-/-) mice.	/pubmed/15028732	create date:2004/03/19 | first author:Suzuki R	2004	C57BL/6	Y		N	0	One sex	N	N	N						Irs2-/-								0
971	The nuclear receptor CAR is a regulator of thyroid hormone metabolism during caloric restriction.	/pubmed/15004031	create date:2004/03/09 | first author:Maglich JM	2004	C57BL/6	Y		N		One sex	N	N	N						Car-/- & WT
973	Mitochondrial and nuclear DNA base excision repair are affected differently by caloric restriction.	/pubmed/14734635	create date:2004/01/22 | first author:Stuart JA	2004	C57BL6	N		N		One sex	N	N	Y															9
974	Adipose tissue energy metabolism: altered gene expression profile of mice subjected to long-term caloric restriction.	/pubmed/14688200	create date:2003/12/23 | first author:Higami Y	2003	C57Bl6	Y		N		One sex	N	N	N
975	Toxicokinetics of chloral hydrate in ad libitum-fed, dietary-controlled, and calorically restricted male B6C3F1 mice following short-term exposure.	/pubmed/14644628	create date:2003/12/03 | first author:Seng JE	2003	B6C3F1	Y	100	N	0	One sex	N	N	N													100	0
979	The neuropeptide Y Y1 receptor mediates NPY-induced inhibition of the gonadotrope axis under poor metabolic conditions.	/pubmed/14597564	create date:2003/11/05 | first author:Gonzales C	2003	C57BL/6J	N	0	Y		One sex	N	N	N						Y1-/- & WT							0
981	Effects of dietary restriction on total body, femoral, and vertebral bone in SENCAR, C57BL/6, and DBA/2 mice.	/pubmed/14564677	create date:2003/10/18 | first author:Brochmann EJ	2003	SENCAR, C57BL/6, DBA/2	Y	101	N	1	One sex	N	N	N													101	1
982	Leptin reverses the inhibitory effect of caloric restriction on longitudinal growth.	/pubmed/14525912	create date:2003/10/04 | first author:Gat-Yablonski G	2003	ICR	Y	18	N	0	One sex	N	N	N													18	0
983	Role of glucose and ketone bodies in the metabolic control of experimental brain cancer.	/pubmed/14520474	create date:2003/10/02 | first author:Seyfried TN	2003	C57BL/6J	Y	33	N	0	One sex	N	N	N													33	0
985	Dbh(-/-) mice are hypotensive, have altered circadian rhythms, and have abnormal responses to dieting and stress.	/pubmed/12969876	create date:2003/09/13 | first author:Swoap SJ	2003	129/SvCPJ x C57BL/6J	N		N		One sex	N	N	Y						Dbh-/- &dbh+/-									14
986	Effects of age and caloric restriction on glutathione redox state in mice.	/pubmed/12957655	create date:2003/09/06 | first author:Rebrin I	2003	C57BL/6Nnia	Y		N		One sex	N	N	N
988	Calorie restriction in mice does not affect LDL reverse cholesterol transport in vivo.	/pubmed/12890475	create date:2003/08/02 | first author:Stein O	2003	C57BL/6	Y	24	N	0	One sex	N	N	N													24	0
992	Strain variation in the response of body temperature to dietary restriction.	/pubmed/12735906	create date:2003/05/09 | first author:Rikke BA	2003	ILS, ISS, 129S6, A, BALB/c, C57BL/6, C3H, DBA, LSXSS	N	0	Y	254	One sex	N	N	N													0	254
993	Effect of moderate caloric restriction and/or weight cycling on mammary tumor incidence and latency in MMTV-Neu female mice.	/pubmed/12734063	create date:2003/05/08 | first author:Pape-Ansorge KA	2003	FVB/N x Neu	N	0	Y	96	One sex	N	N	N						MMTV-Neu							0	96
994	Effects of soy protein diet on the expression of adipose genes and plasma adiponectin.	/pubmed/12660873	create date:2003/03/28 | first author:Nagasawa A	2003	C57BL/6	Y	24	N	0	One sex	N	N	N						KK-AY							24	0
996	Food restriction and fish oil suppress atherogenic risk factors in lupus-prone (NZB x NZW) F1 mice.	/pubmed/12645857	create date:2003/03/21 | first author:Muthukumar A	2003	NZB _ NZW	N		Y		One sex	N	N	N
997	Effects of caloric restriction on cognition and behavior in developing mice.	/pubmed/12614920	create date:2003/03/05 | first author:Wu A	2003	Kunmin	N	0	N	120	XXXXXXX	N	Y	N						Reports sex difference							0	120
1000	Caloric restriction increases gluconeogenic and transaminase enzyme activities in mouse liver.	/pubmed/12581790	create date:2003/02/13 | first author:Hagopian K	2003	C57BL/6J	Y	20	N	20	One sex	N	N	N													20	20
1001	Influence of age and caloric restriction on liver glycolytic enzyme activities and metabolite concentrations in mice.	/pubmed/12581789	create date:2003/02/13 | first author:Hagopian K	2003	C57BL/6J	Y		N	0	One sex	N	N	N														0
1003	Caloric restriction promotes genomic stability by induction of base excision repair and reversal of its age-related decline.	/pubmed/12547392	create date:2003/01/28 | first author:Cabelof DC	2003	C57BL/6	Y		N	0	One sex	N	N	N														0
1004	Extended longevity in mice lacking the insulin receptor in adipose tissue.	/pubmed/12543978	create date:2003/01/25 | first author:Blüher M	2003	NA	N		N		XXXXXXX	N	Y	N						FIRKO & WT
1005	T cell chemokine receptor expression in aging.	/pubmed/12517955	create date:2003/01/09 | first author:Mo R	2003	C57BL/6	N		N		One sex	N	N	Y
18	Exploring the effect of diet composition in calorie restriction interventions.	/pubmed/30258090	create date:2018/09/28 | first author:Morris A	2018	Could not see clear evidence of CR in mice in vivo	Could not see clear evidence of CR in mice in vivo	Could not see clear evidence of CR in mice in vivo	Could not see clear evidence of CR in mice in vivo	Could not see clear evidence of CR in mice in vivo	Could not see clear evidence of CR in mice in vivo	Could not see clear evidence of CR in mice in vivo	Could not see clear evidence of CR in mice in vivo	Could not see clear evidence of CR in mice in vivo	Could not see clear evidence of CR in mice in vivo	Could not see clear evidence of CR in mice in vivo	Could not see clear evidence of CR in mice in vivo	Could not see clear evidence of CR in mice in vivo	Could not see clear evidence of CR in mice in vivo	Could not see clear evidence of CR in mice in vivo	Could not see clear evidence of CR in mice in vivo	Could not see clear evidence of CR in mice in vivo	Could not see clear evidence of CR in mice in vivo	Could not see clear evidence of CR in mice in vivo	Could not see clear evidence of CR in mice in vivo	Could not see clear evidence of CR in mice in vivo	Could not see clear evidence of CR in mice in vivo	Could not see clear evidence of CR in mice in vivo	Could not see clear evidence of CR in mice in vivo
27	Aspirin-another caloric-restriction mimetic.	/pubmed/29929449	create date:2018/06/23 | first author:Pietrocola F	2018	Could not see clear evidence of CR in mice in vivo	Could not see clear evidence of CR in mice in vivo	Could not see clear evidence of CR in mice in vivo	Could not see clear evidence of CR in mice in vivo	Could not see clear evidence of CR in mice in vivo	Could not see clear evidence of CR in mice in vivo	Could not see clear evidence of CR in mice in vivo	Could not see clear evidence of CR in mice in vivo	Could not see clear evidence of CR in mice in vivo	Could not see clear evidence of CR in mice in vivo	Could not see clear evidence of CR in mice in vivo	Could not see clear evidence of CR in mice in vivo	Could not see clear evidence of CR in mice in vivo	Could not see clear evidence of CR in mice in vivo	Could not see clear evidence of CR in mice in vivo	Could not see clear evidence of CR in mice in vivo	Could not see clear evidence of CR in mice in vivo	Could not see clear evidence of CR in mice in vivo	Could not see clear evidence of CR in mice in vivo	Could not see clear evidence of CR in mice in vivo	Could not see clear evidence of CR in mice in vivo	Could not see clear evidence of CR in mice in vivo	Could not see clear evidence of CR in mice in vivo	Could not see clear evidence of CR in mice in vivo
29	Kidney dysfunction in the low-birth weight murine adult: implications of oxidative stress.	/pubmed/29846114	create date:2018/05/31 | first author:Abdulmahdi W	2018	Could not see clear evidence of CR in mice in vivo	Could not see clear evidence of CR in mice in vivo	Could not see clear evidence of CR in mice in vivo	Could not see clear evidence of CR in mice in vivo	Could not see clear evidence of CR in mice in vivo	Could not see clear evidence of CR in mice in vivo	Could not see clear evidence of CR in mice in vivo	Could not see clear evidence of CR in mice in vivo	Could not see clear evidence of CR in mice in vivo	Could not see clear evidence of CR in mice in vivo	Could not see clear evidence of CR in mice in vivo	Could not see clear evidence of CR in mice in vivo	Could not see clear evidence of CR in mice in vivo	Could not see clear evidence of CR in mice in vivo	Could not see clear evidence of CR in mice in vivo	Could not see clear evidence of CR in mice in vivo	Could not see clear evidence of CR in mice in vivo	Could not see clear evidence of CR in mice in vivo	Could not see clear evidence of CR in mice in vivo	Could not see clear evidence of CR in mice in vivo	Could not see clear evidence of CR in mice in vivo	Could not see clear evidence of CR in mice in vivo	Could not see clear evidence of CR in mice in vivo	Could not see clear evidence of CR in mice in vivo
39	Caloric Restriction as a Therapeutic Approach to Heart Failure: Can Less Be More in (Mice) and Men?	/pubmed/29535115	create date:2018/03/15 | first author:Sandesara PB	2018	Could not see clear evidence of CR in mice in vivo	Could not see clear evidence of CR in mice in vivo	Could not see clear evidence of CR in mice in vivo	Could not see clear evidence of CR in mice in vivo	Could not see clear evidence of CR in mice in vivo	Could not see clear evidence of CR in mice in vivo	Could not see clear evidence of CR in mice in vivo	Could not see clear evidence of CR in mice in vivo	Could not see clear evidence of CR in mice in vivo	Could not see clear evidence of CR in mice in vivo	Could not see clear evidence of CR in mice in vivo	Could not see clear evidence of CR in mice in vivo	Could not see clear evidence of CR in mice in vivo	Could not see clear evidence of CR in mice in vivo	Could not see clear evidence of CR in mice in vivo	Could not see clear evidence of CR in mice in vivo	Could not see clear evidence of CR in mice in vivo	Could not see clear evidence of CR in mice in vivo	Could not see clear evidence of CR in mice in vivo	Could not see clear evidence of CR in mice in vivo	Could not see clear evidence of CR in mice in vivo	Could not see clear evidence of CR in mice in vivo	Could not see clear evidence of CR in mice in vivo	Could not see clear evidence of CR in mice in vivo
41	Effect of nutrient deprivation on the expression and the epigenetic signature of sirtuin genes.	/pubmed/29499851	create date:2018/03/04 | first author:Zullo A	2018	Could not see clear evidence of CR in mice in vivo	Could not see clear evidence of CR in mice in vivo	Could not see clear evidence of CR in mice in vivo	Could not see clear evidence of CR in mice in vivo	Could not see clear evidence of CR in mice in vivo	Could not see clear evidence of CR in mice in vivo	Could not see clear evidence of CR in mice in vivo	Could not see clear evidence of CR in mice in vivo	Could not see clear evidence of CR in mice in vivo	Could not see clear evidence of CR in mice in vivo	Could not see clear evidence of CR in mice in vivo	Could not see clear evidence of CR in mice in vivo	Could not see clear evidence of CR in mice in vivo	Could not see clear evidence of CR in mice in vivo	Could not see clear evidence of CR in mice in vivo	Could not see clear evidence of CR in mice in vivo	Could not see clear evidence of CR in mice in vivo	Could not see clear evidence of CR in mice in vivo	Could not see clear evidence of CR in mice in vivo	Could not see clear evidence of CR in mice in vivo	Could not see clear evidence of CR in mice in vivo	Could not see clear evidence of CR in mice in vivo	Could not see clear evidence of CR in mice in vivo	Could not see clear evidence of CR in mice in vivo
42	Aspirin Recapitulates Features of Caloric Restriction.	/pubmed/29490275	create date:2018/03/01 | first author:Pietrocola F	2018	Could not see clear evidence of CR in mice in vivo	Could not see clear evidence of CR in mice in vivo	Could not see clear evidence of CR in mice in vivo	Could not see clear evidence of CR in mice in vivo	Could not see clear evidence of CR in mice in vivo	Could not see clear evidence of CR in mice in vivo	Could not see clear evidence of CR in mice in vivo	Could not see clear evidence of CR in mice in vivo	Could not see clear evidence of CR in mice in vivo	Could not see clear evidence of CR in mice in vivo	Could not see clear evidence of CR in mice in vivo	Could not see clear evidence of CR in mice in vivo	Could not see clear evidence of CR in mice in vivo	Could not see clear evidence of CR in mice in vivo	Could not see clear evidence of CR in mice in vivo	Could not see clear evidence of CR in mice in vivo	Could not see clear evidence of CR in mice in vivo	Could not see clear evidence of CR in mice in vivo	Could not see clear evidence of CR in mice in vivo	Could not see clear evidence of CR in mice in vivo	Could not see clear evidence of CR in mice in vivo	Could not see clear evidence of CR in mice in vivo	Could not see clear evidence of CR in mice in vivo	Could not see clear evidence of CR in mice in vivo
45	Transcriptome analysis reveals intermittent fasting-induced genetic changes in ischemic stroke.	/pubmed/29447348	create date:2018/02/16 | first author:Kim J	2018	Could not see clear evidence of CR in mice in vivo	Could not see clear evidence of CR in mice in vivo	Could not see clear evidence of CR in mice in vivo	Could not see clear evidence of CR in mice in vivo	Could not see clear evidence of CR in mice in vivo	Could not see clear evidence of CR in mice in vivo	Could not see clear evidence of CR in mice in vivo	Could not see clear evidence of CR in mice in vivo	Could not see clear evidence of CR in mice in vivo	Could not see clear evidence of CR in mice in vivo	Could not see clear evidence of CR in mice in vivo	Could not see clear evidence of CR in mice in vivo	Could not see clear evidence of CR in mice in vivo	Could not see clear evidence of CR in mice in vivo	Could not see clear evidence of CR in mice in vivo	Could not see clear evidence of CR in mice in vivo	Could not see clear evidence of CR in mice in vivo	Could not see clear evidence of CR in mice in vivo	Could not see clear evidence of CR in mice in vivo	Could not see clear evidence of CR in mice in vivo	Could not see clear evidence of CR in mice in vivo	Could not see clear evidence of CR in mice in vivo	Could not see clear evidence of CR in mice in vivo	Could not see clear evidence of CR in mice in vivo
49	Short-term methionine deprivation improves metabolic health via sexually dimorphic, mTORC1-independent mechanisms.	/pubmed/29401631	create date:2018/02/07 | first author:Yu D	2018	Could not see clear evidence of CR in mice in vivo	Could not see clear evidence of CR in mice in vivo	Could not see clear evidence of CR in mice in vivo	Could not see clear evidence of CR in mice in vivo	Could not see clear evidence of CR in mice in vivo	Could not see clear evidence of CR in mice in vivo	Could not see clear evidence of CR in mice in vivo	Could not see clear evidence of CR in mice in vivo	Could not see clear evidence of CR in mice in vivo	Could not see clear evidence of CR in mice in vivo	Could not see clear evidence of CR in mice in vivo	Could not see clear evidence of CR in mice in vivo	Could not see clear evidence of CR in mice in vivo	Could not see clear evidence of CR in mice in vivo	Could not see clear evidence of CR in mice in vivo	Could not see clear evidence of CR in mice in vivo	Could not see clear evidence of CR in mice in vivo	Could not see clear evidence of CR in mice in vivo	Could not see clear evidence of CR in mice in vivo	Could not see clear evidence of CR in mice in vivo	Could not see clear evidence of CR in mice in vivo	Could not see clear evidence of CR in mice in vivo	Could not see clear evidence of CR in mice in vivo	Could not see clear evidence of CR in mice in vivo
50	Hypothalamic miR-219 regulates individual metabolic differences in response to diet-induced weight cycling.	/pubmed/29398616	create date:2018/02/06 | first author:Schroeder M	2018	Could not see clear evidence of CR in mice in vivo	Could not see clear evidence of CR in mice in vivo	Could not see clear evidence of CR in mice in vivo	Could not see clear evidence of CR in mice in vivo	Could not see clear evidence of CR in mice in vivo	Could not see clear evidence of CR in mice in vivo	Could not see clear evidence of CR in mice in vivo	Could not see clear evidence of CR in mice in vivo	Could not see clear evidence of CR in mice in vivo	Could not see clear evidence of CR in mice in vivo	Could not see clear evidence of CR in mice in vivo	Could not see clear evidence of CR in mice in vivo	Could not see clear evidence of CR in mice in vivo	Could not see clear evidence of CR in mice in vivo	Could not see clear evidence of CR in mice in vivo	Could not see clear evidence of CR in mice in vivo	Could not see clear evidence of CR in mice in vivo	Could not see clear evidence of CR in mice in vivo	Could not see clear evidence of CR in mice in vivo	Could not see clear evidence of CR in mice in vivo	Could not see clear evidence of CR in mice in vivo	Could not see clear evidence of CR in mice in vivo	Could not see clear evidence of CR in mice in vivo	Could not see clear evidence of CR in mice in vivo
54	Agave fructans and oligofructose decrease oxidative stress in brain regions involved in learning and memory of overweight mice.	/pubmed/29313362	create date:2018/01/10 | first author:Franco-Robles E	2018	Could not see clear evidence of CR in mice in vivo	Could not see clear evidence of CR in mice in vivo	Could not see clear evidence of CR in mice in vivo	Could not see clear evidence of CR in mice in vivo	Could not see clear evidence of CR in mice in vivo	Could not see clear evidence of CR in mice in vivo	Could not see clear evidence of CR in mice in vivo	Could not see clear evidence of CR in mice in vivo	Could not see clear evidence of CR in mice in vivo	Could not see clear evidence of CR in mice in vivo	Could not see clear evidence of CR in mice in vivo	Could not see clear evidence of CR in mice in vivo	Could not see clear evidence of CR in mice in vivo	Could not see clear evidence of CR in mice in vivo	Could not see clear evidence of CR in mice in vivo	Could not see clear evidence of CR in mice in vivo	Could not see clear evidence of CR in mice in vivo	Could not see clear evidence of CR in mice in vivo	Could not see clear evidence of CR in mice in vivo	Could not see clear evidence of CR in mice in vivo	Could not see clear evidence of CR in mice in vivo	Could not see clear evidence of CR in mice in vivo	Could not see clear evidence of CR in mice in vivo	Could not see clear evidence of CR in mice in vivo
55	Small-molecule TFEB pathway agonists that ameliorate metabolic syndrome in mice and extend C. elegans lifespan.	/pubmed/29273768	create date:2017/12/24 | first author:Wang C	2017	Could not see clear evidence of CR in mice in vivo	Could not see clear evidence of CR in mice in vivo	Could not see clear evidence of CR in mice in vivo	Could not see clear evidence of CR in mice in vivo	Could not see clear evidence of CR in mice in vivo	Could not see clear evidence of CR in mice in vivo	Could not see clear evidence of CR in mice in vivo	Could not see clear evidence of CR in mice in vivo	Could not see clear evidence of CR in mice in vivo	Could not see clear evidence of CR in mice in vivo	Could not see clear evidence of CR in mice in vivo	Could not see clear evidence of CR in mice in vivo	Could not see clear evidence of CR in mice in vivo	Could not see clear evidence of CR in mice in vivo	Could not see clear evidence of CR in mice in vivo	Could not see clear evidence of CR in mice in vivo	Could not see clear evidence of CR in mice in vivo	Could not see clear evidence of CR in mice in vivo	Could not see clear evidence of CR in mice in vivo	Could not see clear evidence of CR in mice in vivo	Could not see clear evidence of CR in mice in vivo	Could not see clear evidence of CR in mice in vivo	Could not see clear evidence of CR in mice in vivo	Could not see clear evidence of CR in mice in vivo
56	Restoration of metabolic health by decreased consumption of branched-chain amino acids.	/pubmed/29266268	create date:2017/12/22 | first author:Cummings NE	2017	Could not see clear evidence of CR in mice in vivo	Could not see clear evidence of CR in mice in vivo	Could not see clear evidence of CR in mice in vivo	Could not see clear evidence of CR in mice in vivo	Could not see clear evidence of CR in mice in vivo	Could not see clear evidence of CR in mice in vivo	Could not see clear evidence of CR in mice in vivo	Could not see clear evidence of CR in mice in vivo	Could not see clear evidence of CR in mice in vivo	Could not see clear evidence of CR in mice in vivo	Could not see clear evidence of CR in mice in vivo	Could not see clear evidence of CR in mice in vivo	Could not see clear evidence of CR in mice in vivo	Could not see clear evidence of CR in mice in vivo	Could not see clear evidence of CR in mice in vivo	Could not see clear evidence of CR in mice in vivo	Could not see clear evidence of CR in mice in vivo	Could not see clear evidence of CR in mice in vivo	Could not see clear evidence of CR in mice in vivo	Could not see clear evidence of CR in mice in vivo	Could not see clear evidence of CR in mice in vivo	Could not see clear evidence of CR in mice in vivo	Could not see clear evidence of CR in mice in vivo	Could not see clear evidence of CR in mice in vivo
58	LEAP2 Is an Endogenous Antagonist of the Ghrelin Receptor.	/pubmed/29233536	create date:2017/12/14 | first author:Ge X	2017	Could not see clear evidence of CR in mice in vivo	Could not see clear evidence of CR in mice in vivo	Could not see clear evidence of CR in mice in vivo	Could not see clear evidence of CR in mice in vivo	Could not see clear evidence of CR in mice in vivo	Could not see clear evidence of CR in mice in vivo	Could not see clear evidence of CR in mice in vivo	Could not see clear evidence of CR in mice in vivo	Could not see clear evidence of CR in mice in vivo	Could not see clear evidence of CR in mice in vivo	Could not see clear evidence of CR in mice in vivo	Could not see clear evidence of CR in mice in vivo	Could not see clear evidence of CR in mice in vivo	Could not see clear evidence of CR in mice in vivo	Could not see clear evidence of CR in mice in vivo	Could not see clear evidence of CR in mice in vivo	Could not see clear evidence of CR in mice in vivo	Could not see clear evidence of CR in mice in vivo	Could not see clear evidence of CR in mice in vivo	Could not see clear evidence of CR in mice in vivo	Could not see clear evidence of CR in mice in vivo	Could not see clear evidence of CR in mice in vivo	Could not see clear evidence of CR in mice in vivo	Could not see clear evidence of CR in mice in vivo
63	System-wide Benefits of Intermeal Fasting by Autophagy.	/pubmed/29107505	create date:2017/11/07 | first author:Martinez-Lopez N	2017	Could not see clear evidence of CR in mice in vivo	Could not see clear evidence of CR in mice in vivo	Could not see clear evidence of CR in mice in vivo	Could not see clear evidence of CR in mice in vivo	Could not see clear evidence of CR in mice in vivo	Could not see clear evidence of CR in mice in vivo	Could not see clear evidence of CR in mice in vivo	Could not see clear evidence of CR in mice in vivo	Could not see clear evidence of CR in mice in vivo	Could not see clear evidence of CR in mice in vivo	Could not see clear evidence of CR in mice in vivo	Could not see clear evidence of CR in mice in vivo	Could not see clear evidence of CR in mice in vivo	Could not see clear evidence of CR in mice in vivo	Could not see clear evidence of CR in mice in vivo	Could not see clear evidence of CR in mice in vivo	Could not see clear evidence of CR in mice in vivo	Could not see clear evidence of CR in mice in vivo	Could not see clear evidence of CR in mice in vivo	Could not see clear evidence of CR in mice in vivo	Could not see clear evidence of CR in mice in vivo	Could not see clear evidence of CR in mice in vivo	Could not see clear evidence of CR in mice in vivo	Could not see clear evidence of CR in mice in vivo
74	Aging: rewiring the circadian clock.	/pubmed/28880862	create date:2017/09/08 | first author:Ohkubo R	2017	Could not see clear evidence of CR in mice in vivo	Could not see clear evidence of CR in mice in vivo	Could not see clear evidence of CR in mice in vivo	Could not see clear evidence of CR in mice in vivo	Could not see clear evidence of CR in mice in vivo	Could not see clear evidence of CR in mice in vivo	Could not see clear evidence of CR in mice in vivo	Could not see clear evidence of CR in mice in vivo	Could not see clear evidence of CR in mice in vivo	Could not see clear evidence of CR in mice in vivo	Could not see clear evidence of CR in mice in vivo	Could not see clear evidence of CR in mice in vivo	Could not see clear evidence of CR in mice in vivo	Could not see clear evidence of CR in mice in vivo	Could not see clear evidence of CR in mice in vivo	Could not see clear evidence of CR in mice in vivo	Could not see clear evidence of CR in mice in vivo	Could not see clear evidence of CR in mice in vivo	Could not see clear evidence of CR in mice in vivo	Could not see clear evidence of CR in mice in vivo	Could not see clear evidence of CR in mice in vivo	Could not see clear evidence of CR in mice in vivo	Could not see clear evidence of CR in mice in vivo	Could not see clear evidence of CR in mice in vivo
75	Regulation of myoblast differentiation by metabolic perturbations induced by metformin.	/pubmed/28859084	create date:2017/09/01 | first author:Pavlidou T	2017	Could not see clear evidence of CR in mice in vivo	Could not see clear evidence of CR in mice in vivo	Could not see clear evidence of CR in mice in vivo	Could not see clear evidence of CR in mice in vivo	Could not see clear evidence of CR in mice in vivo	Could not see clear evidence of CR in mice in vivo	Could not see clear evidence of CR in mice in vivo	Could not see clear evidence of CR in mice in vivo	Could not see clear evidence of CR in mice in vivo	Could not see clear evidence of CR in mice in vivo	Could not see clear evidence of CR in mice in vivo	Could not see clear evidence of CR in mice in vivo	Could not see clear evidence of CR in mice in vivo	Could not see clear evidence of CR in mice in vivo	Could not see clear evidence of CR in mice in vivo	Could not see clear evidence of CR in mice in vivo	Could not see clear evidence of CR in mice in vivo	Could not see clear evidence of CR in mice in vivo	Could not see clear evidence of CR in mice in vivo	Could not see clear evidence of CR in mice in vivo	Could not see clear evidence of CR in mice in vivo	Could not see clear evidence of CR in mice in vivo	Could not see clear evidence of CR in mice in vivo	Could not see clear evidence of CR in mice in vivo
81	Differential alternative splicing coupled to nonsense-mediated decay of mRNA ensures dietary restriction-induced longevity.	/pubmed/28824175	create date:2017/08/22 | first author:Tabrez SS	2017	Could not see clear evidence of CR in mice in vivo	Could not see clear evidence of CR in mice in vivo	Could not see clear evidence of CR in mice in vivo	Could not see clear evidence of CR in mice in vivo	Could not see clear evidence of CR in mice in vivo	Could not see clear evidence of CR in mice in vivo	Could not see clear evidence of CR in mice in vivo	Could not see clear evidence of CR in mice in vivo	Could not see clear evidence of CR in mice in vivo	Could not see clear evidence of CR in mice in vivo	Could not see clear evidence of CR in mice in vivo	Could not see clear evidence of CR in mice in vivo	Could not see clear evidence of CR in mice in vivo	Could not see clear evidence of CR in mice in vivo	Could not see clear evidence of CR in mice in vivo	Could not see clear evidence of CR in mice in vivo	Could not see clear evidence of CR in mice in vivo	Could not see clear evidence of CR in mice in vivo	Could not see clear evidence of CR in mice in vivo	Could not see clear evidence of CR in mice in vivo	Could not see clear evidence of CR in mice in vivo	Could not see clear evidence of CR in mice in vivo	Could not see clear evidence of CR in mice in vivo	Could not see clear evidence of CR in mice in vivo
85	Symbiotic Origin of Aging.	/pubmed/28791889	create date:2017/08/10 | first author:Greenberg EF	2017	Could not see clear evidence of CR in mice in vivo	Could not see clear evidence of CR in mice in vivo	Could not see clear evidence of CR in mice in vivo	Could not see clear evidence of CR in mice in vivo	Could not see clear evidence of CR in mice in vivo	Could not see clear evidence of CR in mice in vivo	Could not see clear evidence of CR in mice in vivo	Could not see clear evidence of CR in mice in vivo	Could not see clear evidence of CR in mice in vivo	Could not see clear evidence of CR in mice in vivo	Could not see clear evidence of CR in mice in vivo	Could not see clear evidence of CR in mice in vivo	Could not see clear evidence of CR in mice in vivo	Could not see clear evidence of CR in mice in vivo	Could not see clear evidence of CR in mice in vivo	Could not see clear evidence of CR in mice in vivo	Could not see clear evidence of CR in mice in vivo	Could not see clear evidence of CR in mice in vivo	Could not see clear evidence of CR in mice in vivo	Could not see clear evidence of CR in mice in vivo	Could not see clear evidence of CR in mice in vivo	Could not see clear evidence of CR in mice in vivo	Could not see clear evidence of CR in mice in vivo	Could not see clear evidence of CR in mice in vivo
87	Differential effects of voluntary treadmill exercise and caloric restriction on tau pathogenesis in a mouse model of Alzheimer's disease-like tau pathology fed with Western diet.	/pubmed/28779908	create date:2017/08/07 | first author:Gratuze M	2017	Could not see clear evidence of CR in mice in vivo	Could not see clear evidence of CR in mice in vivo	Could not see clear evidence of CR in mice in vivo	Could not see clear evidence of CR in mice in vivo	Could not see clear evidence of CR in mice in vivo	Could not see clear evidence of CR in mice in vivo	Could not see clear evidence of CR in mice in vivo	Could not see clear evidence of CR in mice in vivo	Could not see clear evidence of CR in mice in vivo	Could not see clear evidence of CR in mice in vivo	Could not see clear evidence of CR in mice in vivo	Could not see clear evidence of CR in mice in vivo	Could not see clear evidence of CR in mice in vivo	Could not see clear evidence of CR in mice in vivo	Could not see clear evidence of CR in mice in vivo	Could not see clear evidence of CR in mice in vivo	Could not see clear evidence of CR in mice in vivo	Could not see clear evidence of CR in mice in vivo	Could not see clear evidence of CR in mice in vivo	Could not see clear evidence of CR in mice in vivo	Could not see clear evidence of CR in mice in vivo	Could not see clear evidence of CR in mice in vivo	Could not see clear evidence of CR in mice in vivo	Could not see clear evidence of CR in mice in vivo
93	Can a Diet That Mimics Fasting Turn Back the Clock?	/pubmed/28658487	create date:2017/06/29 | first author:Abbasi J	2017	Could not see clear evidence of CR in mice in vivo	Could not see clear evidence of CR in mice in vivo	Could not see clear evidence of CR in mice in vivo	Could not see clear evidence of CR in mice in vivo	Could not see clear evidence of CR in mice in vivo	Could not see clear evidence of CR in mice in vivo	Could not see clear evidence of CR in mice in vivo	Could not see clear evidence of CR in mice in vivo	Could not see clear evidence of CR in mice in vivo	Could not see clear evidence of CR in mice in vivo	Could not see clear evidence of CR in mice in vivo	Could not see clear evidence of CR in mice in vivo	Could not see clear evidence of CR in mice in vivo	Could not see clear evidence of CR in mice in vivo	Could not see clear evidence of CR in mice in vivo	Could not see clear evidence of CR in mice in vivo	Could not see clear evidence of CR in mice in vivo	Could not see clear evidence of CR in mice in vivo	Could not see clear evidence of CR in mice in vivo	Could not see clear evidence of CR in mice in vivo	Could not see clear evidence of CR in mice in vivo	Could not see clear evidence of CR in mice in vivo	Could not see clear evidence of CR in mice in vivo	Could not see clear evidence of CR in mice in vivo
100	Anti-diabetic activity of fused PPARγ-SIRT1 ligands with limited body-weight gain by mimicking calorie restriction and decreasing SGK1 expression.	/pubmed/28609708	create date:2017/06/14 | first author:Pirat C	2017	Could not see clear evidence of CR in mice in vivo	Could not see clear evidence of CR in mice in vivo	Could not see clear evidence of CR in mice in vivo	Could not see clear evidence of CR in mice in vivo	Could not see clear evidence of CR in mice in vivo	Could not see clear evidence of CR in mice in vivo	Could not see clear evidence of CR in mice in vivo	Could not see clear evidence of CR in mice in vivo	Could not see clear evidence of CR in mice in vivo	Could not see clear evidence of CR in mice in vivo	Could not see clear evidence of CR in mice in vivo	Could not see clear evidence of CR in mice in vivo	Could not see clear evidence of CR in mice in vivo	Could not see clear evidence of CR in mice in vivo	Could not see clear evidence of CR in mice in vivo	Could not see clear evidence of CR in mice in vivo	Could not see clear evidence of CR in mice in vivo	Could not see clear evidence of CR in mice in vivo	Could not see clear evidence of CR in mice in vivo	Could not see clear evidence of CR in mice in vivo	Could not see clear evidence of CR in mice in vivo	Could not see clear evidence of CR in mice in vivo	Could not see clear evidence of CR in mice in vivo	Could not see clear evidence of CR in mice in vivo
101	Autophagy in natural and therapy-driven anticancer immunosurveillance.	/pubmed/28598229	create date:2017/06/10 | first author:Pietrocola F	2017	Could not see clear evidence of CR in mice in vivo	Could not see clear evidence of CR in mice in vivo	Could not see clear evidence of CR in mice in vivo	Could not see clear evidence of CR in mice in vivo	Could not see clear evidence of CR in mice in vivo	Could not see clear evidence of CR in mice in vivo	Could not see clear evidence of CR in mice in vivo	Could not see clear evidence of CR in mice in vivo	Could not see clear evidence of CR in mice in vivo	Could not see clear evidence of CR in mice in vivo	Could not see clear evidence of CR in mice in vivo	Could not see clear evidence of CR in mice in vivo	Could not see clear evidence of CR in mice in vivo	Could not see clear evidence of CR in mice in vivo	Could not see clear evidence of CR in mice in vivo	Could not see clear evidence of CR in mice in vivo	Could not see clear evidence of CR in mice in vivo	Could not see clear evidence of CR in mice in vivo	Could not see clear evidence of CR in mice in vivo	Could not see clear evidence of CR in mice in vivo	Could not see clear evidence of CR in mice in vivo	Could not see clear evidence of CR in mice in vivo	Could not see clear evidence of CR in mice in vivo	Could not see clear evidence of CR in mice in vivo
108	The PNPLA3 variant associated with fatty liver disease (I148M) accumulates on lipid droplets by evading ubiquitylation.	/pubmed/28520213	create date:2017/05/19 | first author:BasuRay S	2017	Could not see clear evidence of CR in mice in vivo	Could not see clear evidence of CR in mice in vivo	Could not see clear evidence of CR in mice in vivo	Could not see clear evidence of CR in mice in vivo	Could not see clear evidence of CR in mice in vivo	Could not see clear evidence of CR in mice in vivo	Could not see clear evidence of CR in mice in vivo	Could not see clear evidence of CR in mice in vivo	Could not see clear evidence of CR in mice in vivo	Could not see clear evidence of CR in mice in vivo	Could not see clear evidence of CR in mice in vivo	Could not see clear evidence of CR in mice in vivo	Could not see clear evidence of CR in mice in vivo	Could not see clear evidence of CR in mice in vivo	Could not see clear evidence of CR in mice in vivo	Could not see clear evidence of CR in mice in vivo	Could not see clear evidence of CR in mice in vivo	Could not see clear evidence of CR in mice in vivo	Could not see clear evidence of CR in mice in vivo	Could not see clear evidence of CR in mice in vivo	Could not see clear evidence of CR in mice in vivo	Could not see clear evidence of CR in mice in vivo	Could not see clear evidence of CR in mice in vivo	Could not see clear evidence of CR in mice in vivo
128	Unveiling the "Magic" of Diabetes Remission After Weight-Loss Surgery.	/pubmed/28196253	create date:2017/02/15 | first author:Abbasi J	2017	Could not see clear evidence of CR in mice in vivo	Could not see clear evidence of CR in mice in vivo	Could not see clear evidence of CR in mice in vivo	Could not see clear evidence of CR in mice in vivo	Could not see clear evidence of CR in mice in vivo	Could not see clear evidence of CR in mice in vivo	Could not see clear evidence of CR in mice in vivo	Could not see clear evidence of CR in mice in vivo	Could not see clear evidence of CR in mice in vivo	Could not see clear evidence of CR in mice in vivo	Could not see clear evidence of CR in mice in vivo	Could not see clear evidence of CR in mice in vivo	Could not see clear evidence of CR in mice in vivo	Could not see clear evidence of CR in mice in vivo	Could not see clear evidence of CR in mice in vivo	Could not see clear evidence of CR in mice in vivo	Could not see clear evidence of CR in mice in vivo	Could not see clear evidence of CR in mice in vivo	Could not see clear evidence of CR in mice in vivo	Could not see clear evidence of CR in mice in vivo	Could not see clear evidence of CR in mice in vivo	Could not see clear evidence of CR in mice in vivo	Could not see clear evidence of CR in mice in vivo	Could not see clear evidence of CR in mice in vivo
130	A potential role for the secretogranin II-derived peptide EM66 in the hypothalamic regulation of feeding behaviour.	/pubmed/28166374	create date:2017/02/07 | first author:Trebak F	2017	Could not see clear evidence of CR in mice in vivo	Could not see clear evidence of CR in mice in vivo	Could not see clear evidence of CR in mice in vivo	Could not see clear evidence of CR in mice in vivo	Could not see clear evidence of CR in mice in vivo	Could not see clear evidence of CR in mice in vivo	Could not see clear evidence of CR in mice in vivo	Could not see clear evidence of CR in mice in vivo	Could not see clear evidence of CR in mice in vivo	Could not see clear evidence of CR in mice in vivo	Could not see clear evidence of CR in mice in vivo	Could not see clear evidence of CR in mice in vivo	Could not see clear evidence of CR in mice in vivo	Could not see clear evidence of CR in mice in vivo	Could not see clear evidence of CR in mice in vivo	Could not see clear evidence of CR in mice in vivo	Could not see clear evidence of CR in mice in vivo	Could not see clear evidence of CR in mice in vivo	Could not see clear evidence of CR in mice in vivo	Could not see clear evidence of CR in mice in vivo	Could not see clear evidence of CR in mice in vivo	Could not see clear evidence of CR in mice in vivo	Could not see clear evidence of CR in mice in vivo	Could not see clear evidence of CR in mice in vivo
138	Calorie restriction prevents the development of insulin resistance and impaired lipid metabolism in gestational diabetes offspring.	/pubmed/28024145	create date:2016/12/27 | first author:Li T	2016	Could not see clear evidence of CR in mice in vivo	Could not see clear evidence of CR in mice in vivo	Could not see clear evidence of CR in mice in vivo	Could not see clear evidence of CR in mice in vivo	Could not see clear evidence of CR in mice in vivo	Could not see clear evidence of CR in mice in vivo	Could not see clear evidence of CR in mice in vivo	Could not see clear evidence of CR in mice in vivo	Could not see clear evidence of CR in mice in vivo	Could not see clear evidence of CR in mice in vivo	Could not see clear evidence of CR in mice in vivo	Could not see clear evidence of CR in mice in vivo	Could not see clear evidence of CR in mice in vivo	Could not see clear evidence of CR in mice in vivo	Could not see clear evidence of CR in mice in vivo	Could not see clear evidence of CR in mice in vivo	Could not see clear evidence of CR in mice in vivo	Could not see clear evidence of CR in mice in vivo	Could not see clear evidence of CR in mice in vivo	Could not see clear evidence of CR in mice in vivo	Could not see clear evidence of CR in mice in vivo	Could not see clear evidence of CR in mice in vivo	Could not see clear evidence of CR in mice in vivo	Could not see clear evidence of CR in mice in vivo
142	Short term methionine restriction increases hepatic global DNA methylation in adult but not young male C57BL/6J mice.	/pubmed/27940170	create date:2016/12/13 | first author:Mattocks DA	2016	Could not see clear evidence of CR in mice in vivo	Could not see clear evidence of CR in mice in vivo	Could not see clear evidence of CR in mice in vivo	Could not see clear evidence of CR in mice in vivo	Could not see clear evidence of CR in mice in vivo	Could not see clear evidence of CR in mice in vivo	Could not see clear evidence of CR in mice in vivo	Could not see clear evidence of CR in mice in vivo	Could not see clear evidence of CR in mice in vivo	Could not see clear evidence of CR in mice in vivo	Could not see clear evidence of CR in mice in vivo	Could not see clear evidence of CR in mice in vivo	Could not see clear evidence of CR in mice in vivo	Could not see clear evidence of CR in mice in vivo	Could not see clear evidence of CR in mice in vivo	Could not see clear evidence of CR in mice in vivo	Could not see clear evidence of CR in mice in vivo	Could not see clear evidence of CR in mice in vivo	Could not see clear evidence of CR in mice in vivo	Could not see clear evidence of CR in mice in vivo	Could not see clear evidence of CR in mice in vivo	Could not see clear evidence of CR in mice in vivo	Could not see clear evidence of CR in mice in vivo	Could not see clear evidence of CR in mice in vivo
146	Neurobehavioural evaluation of resveratrol in murine models of anxiety and schizophrenia.	/pubmed/27878417	create date:2016/11/24 | first author:Magaji MG	2016	Could not see clear evidence of CR in mice in vivo	Could not see clear evidence of CR in mice in vivo	Could not see clear evidence of CR in mice in vivo	Could not see clear evidence of CR in mice in vivo	Could not see clear evidence of CR in mice in vivo	Could not see clear evidence of CR in mice in vivo	Could not see clear evidence of CR in mice in vivo	Could not see clear evidence of CR in mice in vivo	Could not see clear evidence of CR in mice in vivo	Could not see clear evidence of CR in mice in vivo	Could not see clear evidence of CR in mice in vivo	Could not see clear evidence of CR in mice in vivo	Could not see clear evidence of CR in mice in vivo	Could not see clear evidence of CR in mice in vivo	Could not see clear evidence of CR in mice in vivo	Could not see clear evidence of CR in mice in vivo	Could not see clear evidence of CR in mice in vivo	Could not see clear evidence of CR in mice in vivo	Could not see clear evidence of CR in mice in vivo	Could not see clear evidence of CR in mice in vivo	Could not see clear evidence of CR in mice in vivo	Could not see clear evidence of CR in mice in vivo	Could not see clear evidence of CR in mice in vivo	Could not see clear evidence of CR in mice in vivo
149	Tumor-Induced IL-6 Reprograms Host Metabolism to Suppress Anti-tumor Immunity.	/pubmed/27829137	create date:2016/11/10 | first author:Flint TR	2016	Could not see clear evidence of CR in mice in vivo	Could not see clear evidence of CR in mice in vivo	Could not see clear evidence of CR in mice in vivo	Could not see clear evidence of CR in mice in vivo	Could not see clear evidence of CR in mice in vivo	Could not see clear evidence of CR in mice in vivo	Could not see clear evidence of CR in mice in vivo	Could not see clear evidence of CR in mice in vivo	Could not see clear evidence of CR in mice in vivo	Could not see clear evidence of CR in mice in vivo	Could not see clear evidence of CR in mice in vivo	Could not see clear evidence of CR in mice in vivo	Could not see clear evidence of CR in mice in vivo	Could not see clear evidence of CR in mice in vivo	Could not see clear evidence of CR in mice in vivo	Could not see clear evidence of CR in mice in vivo	Could not see clear evidence of CR in mice in vivo	Could not see clear evidence of CR in mice in vivo	Could not see clear evidence of CR in mice in vivo	Could not see clear evidence of CR in mice in vivo	Could not see clear evidence of CR in mice in vivo	Could not see clear evidence of CR in mice in vivo	Could not see clear evidence of CR in mice in vivo	Could not see clear evidence of CR in mice in vivo
151	Defective adaptive thermogenesis contributes to metabolic syndrome and liver steatosis in obese mice.	/pubmed/27803297	create date:2016/11/03 | first author:Poekes L	2016	Could not see clear evidence of CR in mice in vivo	Could not see clear evidence of CR in mice in vivo	Could not see clear evidence of CR in mice in vivo	Could not see clear evidence of CR in mice in vivo	Could not see clear evidence of CR in mice in vivo	Could not see clear evidence of CR in mice in vivo	Could not see clear evidence of CR in mice in vivo	Could not see clear evidence of CR in mice in vivo	Could not see clear evidence of CR in mice in vivo	Could not see clear evidence of CR in mice in vivo	Could not see clear evidence of CR in mice in vivo	Could not see clear evidence of CR in mice in vivo	Could not see clear evidence of CR in mice in vivo	Could not see clear evidence of CR in mice in vivo	Could not see clear evidence of CR in mice in vivo	Could not see clear evidence of CR in mice in vivo	Could not see clear evidence of CR in mice in vivo	Could not see clear evidence of CR in mice in vivo	Could not see clear evidence of CR in mice in vivo	Could not see clear evidence of CR in mice in vivo	Could not see clear evidence of CR in mice in vivo	Could not see clear evidence of CR in mice in vivo	Could not see clear evidence of CR in mice in vivo	Could not see clear evidence of CR in mice in vivo
152	Circulating adipocyte-derived extracellular vesicles are novel markers of metabolic stress.	/pubmed/27394413	create date:2016/10/21 | first author:Eguchi A	2016	Could not see clear evidence of CR in mice in vivo	Could not see clear evidence of CR in mice in vivo	Could not see clear evidence of CR in mice in vivo	Could not see clear evidence of CR in mice in vivo	Could not see clear evidence of CR in mice in vivo	Could not see clear evidence of CR in mice in vivo	Could not see clear evidence of CR in mice in vivo	Could not see clear evidence of CR in mice in vivo	Could not see clear evidence of CR in mice in vivo	Could not see clear evidence of CR in mice in vivo	Could not see clear evidence of CR in mice in vivo	Could not see clear evidence of CR in mice in vivo	Could not see clear evidence of CR in mice in vivo	Could not see clear evidence of CR in mice in vivo	Could not see clear evidence of CR in mice in vivo	Could not see clear evidence of CR in mice in vivo	Could not see clear evidence of CR in mice in vivo	Could not see clear evidence of CR in mice in vivo	Could not see clear evidence of CR in mice in vivo	Could not see clear evidence of CR in mice in vivo	Could not see clear evidence of CR in mice in vivo	Could not see clear evidence of CR in mice in vivo	Could not see clear evidence of CR in mice in vivo	Could not see clear evidence of CR in mice in vivo
153	Increased ghrelin signaling prolongs survival in mouse models of human aging through activation of sirtuin1.	/pubmed/26830139	create date:2016/10/21 | first author:Fujitsuka N	2016	Could not see clear evidence of CR in mice in vivo	Could not see clear evidence of CR in mice in vivo	Could not see clear evidence of CR in mice in vivo	Could not see clear evidence of CR in mice in vivo	Could not see clear evidence of CR in mice in vivo	Could not see clear evidence of CR in mice in vivo	Could not see clear evidence of CR in mice in vivo	Could not see clear evidence of CR in mice in vivo	Could not see clear evidence of CR in mice in vivo	Could not see clear evidence of CR in mice in vivo	Could not see clear evidence of CR in mice in vivo	Could not see clear evidence of CR in mice in vivo	Could not see clear evidence of CR in mice in vivo	Could not see clear evidence of CR in mice in vivo	Could not see clear evidence of CR in mice in vivo	Could not see clear evidence of CR in mice in vivo	Could not see clear evidence of CR in mice in vivo	Could not see clear evidence of CR in mice in vivo	Could not see clear evidence of CR in mice in vivo	Could not see clear evidence of CR in mice in vivo	Could not see clear evidence of CR in mice in vivo	Could not see clear evidence of CR in mice in vivo	Could not see clear evidence of CR in mice in vivo	Could not see clear evidence of CR in mice in vivo
156	Ghrelin, Ghrelin O-Acyltransferase, and Carbohydrate Metabolism During Pregnancy in Calorie-Restricted Mice.	/pubmed/27701682	create date:2016/10/05 | first author:Trivedi A	2016	Could not see clear evidence of CR in mice in vivo	Could not see clear evidence of CR in mice in vivo	Could not see clear evidence of CR in mice in vivo	Could not see clear evidence of CR in mice in vivo	Could not see clear evidence of CR in mice in vivo	Could not see clear evidence of CR in mice in vivo	Could not see clear evidence of CR in mice in vivo	Could not see clear evidence of CR in mice in vivo	Could not see clear evidence of CR in mice in vivo	Could not see clear evidence of CR in mice in vivo	Could not see clear evidence of CR in mice in vivo	Could not see clear evidence of CR in mice in vivo	Could not see clear evidence of CR in mice in vivo	Could not see clear evidence of CR in mice in vivo	Could not see clear evidence of CR in mice in vivo	Could not see clear evidence of CR in mice in vivo	Could not see clear evidence of CR in mice in vivo	Could not see clear evidence of CR in mice in vivo	Could not see clear evidence of CR in mice in vivo	Could not see clear evidence of CR in mice in vivo	Could not see clear evidence of CR in mice in vivo	Could not see clear evidence of CR in mice in vivo	Could not see clear evidence of CR in mice in vivo	Could not see clear evidence of CR in mice in vivo
157	Obesity-induced lymphatic dysfunction is reversible with weight loss.	/pubmed/27619475	create date:2016/09/14 | first author:Nitti MD	2016	Could not see clear evidence of CR in mice in vivo	Could not see clear evidence of CR in mice in vivo	Could not see clear evidence of CR in mice in vivo	Could not see clear evidence of CR in mice in vivo	Could not see clear evidence of CR in mice in vivo	Could not see clear evidence of CR in mice in vivo	Could not see clear evidence of CR in mice in vivo	Could not see clear evidence of CR in mice in vivo	Could not see clear evidence of CR in mice in vivo	Could not see clear evidence of CR in mice in vivo	Could not see clear evidence of CR in mice in vivo	Could not see clear evidence of CR in mice in vivo	Could not see clear evidence of CR in mice in vivo	Could not see clear evidence of CR in mice in vivo	Could not see clear evidence of CR in mice in vivo	Could not see clear evidence of CR in mice in vivo	Could not see clear evidence of CR in mice in vivo	Could not see clear evidence of CR in mice in vivo	Could not see clear evidence of CR in mice in vivo	Could not see clear evidence of CR in mice in vivo	Could not see clear evidence of CR in mice in vivo	Could not see clear evidence of CR in mice in vivo	Could not see clear evidence of CR in mice in vivo	Could not see clear evidence of CR in mice in vivo
160	The unexpected role of mTORC1 in intestinal stem cells during calorie restriction.	/pubmed/27592731	create date:2016/09/07 | first author:Igarashi M	2016	Could not see clear evidence of CR in mice in vivo	Could not see clear evidence of CR in mice in vivo	Could not see clear evidence of CR in mice in vivo	Could not see clear evidence of CR in mice in vivo	Could not see clear evidence of CR in mice in vivo	Could not see clear evidence of CR in mice in vivo	Could not see clear evidence of CR in mice in vivo	Could not see clear evidence of CR in mice in vivo	Could not see clear evidence of CR in mice in vivo	Could not see clear evidence of CR in mice in vivo	Could not see clear evidence of CR in mice in vivo	Could not see clear evidence of CR in mice in vivo	Could not see clear evidence of CR in mice in vivo	Could not see clear evidence of CR in mice in vivo	Could not see clear evidence of CR in mice in vivo	Could not see clear evidence of CR in mice in vivo	Could not see clear evidence of CR in mice in vivo	Could not see clear evidence of CR in mice in vivo	Could not see clear evidence of CR in mice in vivo	Could not see clear evidence of CR in mice in vivo	Could not see clear evidence of CR in mice in vivo	Could not see clear evidence of CR in mice in vivo	Could not see clear evidence of CR in mice in vivo	Could not see clear evidence of CR in mice in vivo
168	Maternal Calorie Restriction Causing Uteroplacental Insufficiency Differentially Affects Mammalian Placental Glucose and Leucine Transport Molecular Mechanisms.	/pubmed/27494059	create date:2016/08/06 | first author:Ganguly A	2016	Could not see clear evidence of CR in mice in vivo	Could not see clear evidence of CR in mice in vivo	Could not see clear evidence of CR in mice in vivo	Could not see clear evidence of CR in mice in vivo	Could not see clear evidence of CR in mice in vivo	Could not see clear evidence of CR in mice in vivo	Could not see clear evidence of CR in mice in vivo	Could not see clear evidence of CR in mice in vivo	Could not see clear evidence of CR in mice in vivo	Could not see clear evidence of CR in mice in vivo	Could not see clear evidence of CR in mice in vivo	Could not see clear evidence of CR in mice in vivo	Could not see clear evidence of CR in mice in vivo	Could not see clear evidence of CR in mice in vivo	Could not see clear evidence of CR in mice in vivo	Could not see clear evidence of CR in mice in vivo	Could not see clear evidence of CR in mice in vivo	Could not see clear evidence of CR in mice in vivo	Could not see clear evidence of CR in mice in vivo	Could not see clear evidence of CR in mice in vivo	Could not see clear evidence of CR in mice in vivo	Could not see clear evidence of CR in mice in vivo	Could not see clear evidence of CR in mice in vivo	Could not see clear evidence of CR in mice in vivo
171	Live fast, die young.	/pubmed/27443744	create date:2016/07/23 | first author:Dance A	2016	Could not see clear evidence of CR in mice in vivo	Could not see clear evidence of CR in mice in vivo	Could not see clear evidence of CR in mice in vivo	Could not see clear evidence of CR in mice in vivo	Could not see clear evidence of CR in mice in vivo	Could not see clear evidence of CR in mice in vivo	Could not see clear evidence of CR in mice in vivo	Could not see clear evidence of CR in mice in vivo	Could not see clear evidence of CR in mice in vivo	Could not see clear evidence of CR in mice in vivo	Could not see clear evidence of CR in mice in vivo	Could not see clear evidence of CR in mice in vivo	Could not see clear evidence of CR in mice in vivo	Could not see clear evidence of CR in mice in vivo	Could not see clear evidence of CR in mice in vivo	Could not see clear evidence of CR in mice in vivo	Could not see clear evidence of CR in mice in vivo	Could not see clear evidence of CR in mice in vivo	Could not see clear evidence of CR in mice in vivo	Could not see clear evidence of CR in mice in vivo	Could not see clear evidence of CR in mice in vivo	Could not see clear evidence of CR in mice in vivo	Could not see clear evidence of CR in mice in vivo	Could not see clear evidence of CR in mice in vivo
173	Caloric Restriction Mimetics Enhance Anticancer Immunosurveillance.	/pubmed/27411589	create date:2016/07/15 | first author:Pietrocola F	2016	Could not see clear evidence of CR in mice in vivo	Could not see clear evidence of CR in mice in vivo	Could not see clear evidence of CR in mice in vivo	Could not see clear evidence of CR in mice in vivo	Could not see clear evidence of CR in mice in vivo	Could not see clear evidence of CR in mice in vivo	Could not see clear evidence of CR in mice in vivo	Could not see clear evidence of CR in mice in vivo	Could not see clear evidence of CR in mice in vivo	Could not see clear evidence of CR in mice in vivo	Could not see clear evidence of CR in mice in vivo	Could not see clear evidence of CR in mice in vivo	Could not see clear evidence of CR in mice in vivo	Could not see clear evidence of CR in mice in vivo	Could not see clear evidence of CR in mice in vivo	Could not see clear evidence of CR in mice in vivo	Could not see clear evidence of CR in mice in vivo	Could not see clear evidence of CR in mice in vivo	Could not see clear evidence of CR in mice in vivo	Could not see clear evidence of CR in mice in vivo	Could not see clear evidence of CR in mice in vivo	Could not see clear evidence of CR in mice in vivo	Could not see clear evidence of CR in mice in vivo	Could not see clear evidence of CR in mice in vivo
182	DJ-1 deficiency attenuates expansion of liver progenitor cells through modulating the inflammatory and fibrogenic niches.	/pubmed/27277679	create date:2016/06/10 | first author:Chen L	2016	Could not see clear evidence of CR in mice in vivo	Could not see clear evidence of CR in mice in vivo	Could not see clear evidence of CR in mice in vivo	Could not see clear evidence of CR in mice in vivo	Could not see clear evidence of CR in mice in vivo	Could not see clear evidence of CR in mice in vivo	Could not see clear evidence of CR in mice in vivo	Could not see clear evidence of CR in mice in vivo	Could not see clear evidence of CR in mice in vivo	Could not see clear evidence of CR in mice in vivo	Could not see clear evidence of CR in mice in vivo	Could not see clear evidence of CR in mice in vivo	Could not see clear evidence of CR in mice in vivo	Could not see clear evidence of CR in mice in vivo	Could not see clear evidence of CR in mice in vivo	Could not see clear evidence of CR in mice in vivo	Could not see clear evidence of CR in mice in vivo	Could not see clear evidence of CR in mice in vivo	Could not see clear evidence of CR in mice in vivo	Could not see clear evidence of CR in mice in vivo	Could not see clear evidence of CR in mice in vivo	Could not see clear evidence of CR in mice in vivo	Could not see clear evidence of CR in mice in vivo	Could not see clear evidence of CR in mice in vivo
186	Coupling of myocardial stress resistance and signalling to voluntary activity and inactivity.	/pubmed/27174591	create date:2016/05/14 | first author:Budiono BP	2016	Could not see clear evidence of CR in mice in vivo	Could not see clear evidence of CR in mice in vivo	Could not see clear evidence of CR in mice in vivo	Could not see clear evidence of CR in mice in vivo	Could not see clear evidence of CR in mice in vivo	Could not see clear evidence of CR in mice in vivo	Could not see clear evidence of CR in mice in vivo	Could not see clear evidence of CR in mice in vivo	Could not see clear evidence of CR in mice in vivo	Could not see clear evidence of CR in mice in vivo	Could not see clear evidence of CR in mice in vivo	Could not see clear evidence of CR in mice in vivo	Could not see clear evidence of CR in mice in vivo	Could not see clear evidence of CR in mice in vivo	Could not see clear evidence of CR in mice in vivo	Could not see clear evidence of CR in mice in vivo	Could not see clear evidence of CR in mice in vivo	Could not see clear evidence of CR in mice in vivo	Could not see clear evidence of CR in mice in vivo	Could not see clear evidence of CR in mice in vivo	Could not see clear evidence of CR in mice in vivo	Could not see clear evidence of CR in mice in vivo	Could not see clear evidence of CR in mice in vivo	Could not see clear evidence of CR in mice in vivo
190	Bisphenol A Promotes Adiposity and Inflammation in a Nonmonotonic Dose-response Way in 5-week-old Male and Female C57BL/6J Mice Fed a Low-calorie Diet.	/pubmed/27145005	create date:2016/05/05 | first author:Yang M	2016	Could not see clear evidence of CR in mice in vivo	Could not see clear evidence of CR in mice in vivo	Could not see clear evidence of CR in mice in vivo	Could not see clear evidence of CR in mice in vivo	Could not see clear evidence of CR in mice in vivo	Could not see clear evidence of CR in mice in vivo	Could not see clear evidence of CR in mice in vivo	Could not see clear evidence of CR in mice in vivo	Could not see clear evidence of CR in mice in vivo	Could not see clear evidence of CR in mice in vivo	Could not see clear evidence of CR in mice in vivo	Could not see clear evidence of CR in mice in vivo	Could not see clear evidence of CR in mice in vivo	Could not see clear evidence of CR in mice in vivo	Could not see clear evidence of CR in mice in vivo	Could not see clear evidence of CR in mice in vivo	Could not see clear evidence of CR in mice in vivo	Could not see clear evidence of CR in mice in vivo	Could not see clear evidence of CR in mice in vivo	Could not see clear evidence of CR in mice in vivo	Could not see clear evidence of CR in mice in vivo	Could not see clear evidence of CR in mice in vivo	Could not see clear evidence of CR in mice in vivo	Could not see clear evidence of CR in mice in vivo
191	Comparative idiosyncrasies in life extension by reduced mTOR signalling and its distinctiveness from dietary restriction.	/pubmed/27139919	create date:2016/05/04 | first author:Garratt M	2016	Could not see clear evidence of CR in mice in vivo	Could not see clear evidence of CR in mice in vivo	Could not see clear evidence of CR in mice in vivo	Could not see clear evidence of CR in mice in vivo	Could not see clear evidence of CR in mice in vivo	Could not see clear evidence of CR in mice in vivo	Could not see clear evidence of CR in mice in vivo	Could not see clear evidence of CR in mice in vivo	Could not see clear evidence of CR in mice in vivo	Could not see clear evidence of CR in mice in vivo	Could not see clear evidence of CR in mice in vivo	Could not see clear evidence of CR in mice in vivo	Could not see clear evidence of CR in mice in vivo	Could not see clear evidence of CR in mice in vivo	Could not see clear evidence of CR in mice in vivo	Could not see clear evidence of CR in mice in vivo	Could not see clear evidence of CR in mice in vivo	Could not see clear evidence of CR in mice in vivo	Could not see clear evidence of CR in mice in vivo	Could not see clear evidence of CR in mice in vivo	Could not see clear evidence of CR in mice in vivo	Could not see clear evidence of CR in mice in vivo	Could not see clear evidence of CR in mice in vivo	Could not see clear evidence of CR in mice in vivo
195	Ghrelin treatment prevents development of activity based anorexia in mice.	/pubmed/27052473	create date:2016/04/08 | first author:Legrand R	2016	Could not see clear evidence of CR in mice in vivo	Could not see clear evidence of CR in mice in vivo	Could not see clear evidence of CR in mice in vivo	Could not see clear evidence of CR in mice in vivo	Could not see clear evidence of CR in mice in vivo	Could not see clear evidence of CR in mice in vivo	Could not see clear evidence of CR in mice in vivo	Could not see clear evidence of CR in mice in vivo	Could not see clear evidence of CR in mice in vivo	Could not see clear evidence of CR in mice in vivo	Could not see clear evidence of CR in mice in vivo	Could not see clear evidence of CR in mice in vivo	Could not see clear evidence of CR in mice in vivo	Could not see clear evidence of CR in mice in vivo	Could not see clear evidence of CR in mice in vivo	Could not see clear evidence of CR in mice in vivo	Could not see clear evidence of CR in mice in vivo	Could not see clear evidence of CR in mice in vivo	Could not see clear evidence of CR in mice in vivo	Could not see clear evidence of CR in mice in vivo	Could not see clear evidence of CR in mice in vivo	Could not see clear evidence of CR in mice in vivo	Could not see clear evidence of CR in mice in vivo	Could not see clear evidence of CR in mice in vivo
214	Death-defying experiments.	/pubmed/26785474	create date:2016/01/20 | first author:Cohen J	2016	Could not see clear evidence of CR in mice in vivo	Could not see clear evidence of CR in mice in vivo	Could not see clear evidence of CR in mice in vivo	Could not see clear evidence of CR in mice in vivo	Could not see clear evidence of CR in mice in vivo	Could not see clear evidence of CR in mice in vivo	Could not see clear evidence of CR in mice in vivo	Could not see clear evidence of CR in mice in vivo	Could not see clear evidence of CR in mice in vivo	Could not see clear evidence of CR in mice in vivo	Could not see clear evidence of CR in mice in vivo	Could not see clear evidence of CR in mice in vivo	Could not see clear evidence of CR in mice in vivo	Could not see clear evidence of CR in mice in vivo	Could not see clear evidence of CR in mice in vivo	Could not see clear evidence of CR in mice in vivo	Could not see clear evidence of CR in mice in vivo	Could not see clear evidence of CR in mice in vivo	Could not see clear evidence of CR in mice in vivo	Could not see clear evidence of CR in mice in vivo	Could not see clear evidence of CR in mice in vivo	Could not see clear evidence of CR in mice in vivo	Could not see clear evidence of CR in mice in vivo	Could not see clear evidence of CR in mice in vivo
223	The Chinese Herb Jianpijiedu Contributes to the Regulation of OATP1B2 and ABCC2 in a Rat Model of Orthotopic Transplantation Liver Cancer Pretreated with Food Restriction and Diarrhea.	/pubmed/26665149	create date:2015/12/15 | first author:Sun B	2015	Could not see clear evidence of CR in mice in vivo	Could not see clear evidence of CR in mice in vivo	Could not see clear evidence of CR in mice in vivo	Could not see clear evidence of CR in mice in vivo	Could not see clear evidence of CR in mice in vivo	Could not see clear evidence of CR in mice in vivo	Could not see clear evidence of CR in mice in vivo	Could not see clear evidence of CR in mice in vivo	Could not see clear evidence of CR in mice in vivo	Could not see clear evidence of CR in mice in vivo	Could not see clear evidence of CR in mice in vivo	Could not see clear evidence of CR in mice in vivo	Could not see clear evidence of CR in mice in vivo	Could not see clear evidence of CR in mice in vivo	Could not see clear evidence of CR in mice in vivo	Could not see clear evidence of CR in mice in vivo	Could not see clear evidence of CR in mice in vivo	Could not see clear evidence of CR in mice in vivo	Could not see clear evidence of CR in mice in vivo	Could not see clear evidence of CR in mice in vivo	Could not see clear evidence of CR in mice in vivo	Could not see clear evidence of CR in mice in vivo	Could not see clear evidence of CR in mice in vivo	Could not see clear evidence of CR in mice in vivo
232	Microbiota-Dependent Hepatic Lipogenesis Mediated by Stearoyl CoA Desaturase 1 (SCD1) Promotes Metabolic Syndrome in TLR5-Deficient Mice.	/pubmed/26525535	create date:2015/11/04 | first author:Singh V	2015	Could not see clear evidence of CR in mice in vivo	Could not see clear evidence of CR in mice in vivo	Could not see clear evidence of CR in mice in vivo	Could not see clear evidence of CR in mice in vivo	Could not see clear evidence of CR in mice in vivo	Could not see clear evidence of CR in mice in vivo	Could not see clear evidence of CR in mice in vivo	Could not see clear evidence of CR in mice in vivo	Could not see clear evidence of CR in mice in vivo	Could not see clear evidence of CR in mice in vivo	Could not see clear evidence of CR in mice in vivo	Could not see clear evidence of CR in mice in vivo	Could not see clear evidence of CR in mice in vivo	Could not see clear evidence of CR in mice in vivo	Could not see clear evidence of CR in mice in vivo	Could not see clear evidence of CR in mice in vivo	Could not see clear evidence of CR in mice in vivo	Could not see clear evidence of CR in mice in vivo	Could not see clear evidence of CR in mice in vivo	Could not see clear evidence of CR in mice in vivo	Could not see clear evidence of CR in mice in vivo	Could not see clear evidence of CR in mice in vivo	Could not see clear evidence of CR in mice in vivo	Could not see clear evidence of CR in mice in vivo
234	Locomotor response to acute nicotine in adolescent mice is altered by maternal undernutrition during lactation.	/pubmed/26482122	create date:2015/10/21 | first author:Dutra-Tavares AC	2015	Could not see clear evidence of CR in mice in vivo	Could not see clear evidence of CR in mice in vivo	Could not see clear evidence of CR in mice in vivo	Could not see clear evidence of CR in mice in vivo	Could not see clear evidence of CR in mice in vivo	Could not see clear evidence of CR in mice in vivo	Could not see clear evidence of CR in mice in vivo	Could not see clear evidence of CR in mice in vivo	Could not see clear evidence of CR in mice in vivo	Could not see clear evidence of CR in mice in vivo	Could not see clear evidence of CR in mice in vivo	Could not see clear evidence of CR in mice in vivo	Could not see clear evidence of CR in mice in vivo	Could not see clear evidence of CR in mice in vivo	Could not see clear evidence of CR in mice in vivo	Could not see clear evidence of CR in mice in vivo	Could not see clear evidence of CR in mice in vivo	Could not see clear evidence of CR in mice in vivo	Could not see clear evidence of CR in mice in vivo	Could not see clear evidence of CR in mice in vivo	Could not see clear evidence of CR in mice in vivo	Could not see clear evidence of CR in mice in vivo	Could not see clear evidence of CR in mice in vivo	Could not see clear evidence of CR in mice in vivo
248	Differential regulation of metabolic parameters by energy deficit and hunger.	/pubmed/26209349	create date:2015/07/26 | first author:Kitka T	2015	Could not see clear evidence of CR in mice in vivo	Could not see clear evidence of CR in mice in vivo	Could not see clear evidence of CR in mice in vivo	Could not see clear evidence of CR in mice in vivo	Could not see clear evidence of CR in mice in vivo	Could not see clear evidence of CR in mice in vivo	Could not see clear evidence of CR in mice in vivo	Could not see clear evidence of CR in mice in vivo	Could not see clear evidence of CR in mice in vivo	Could not see clear evidence of CR in mice in vivo	Could not see clear evidence of CR in mice in vivo	Could not see clear evidence of CR in mice in vivo	Could not see clear evidence of CR in mice in vivo	Could not see clear evidence of CR in mice in vivo	Could not see clear evidence of CR in mice in vivo	Could not see clear evidence of CR in mice in vivo	Could not see clear evidence of CR in mice in vivo	Could not see clear evidence of CR in mice in vivo	Could not see clear evidence of CR in mice in vivo	Could not see clear evidence of CR in mice in vivo	Could not see clear evidence of CR in mice in vivo	Could not see clear evidence of CR in mice in vivo	Could not see clear evidence of CR in mice in vivo	Could not see clear evidence of CR in mice in vivo
249	Circulating microRNA signature of genotype-by-age interactions in the long-lived Ames dwarf mouse.	/pubmed/26176567	create date:2015/07/16 | first author:Victoria B	2015	Could not see clear evidence of CR in mice in vivo	Could not see clear evidence of CR in mice in vivo	Could not see clear evidence of CR in mice in vivo	Could not see clear evidence of CR in mice in vivo	Could not see clear evidence of CR in mice in vivo	Could not see clear evidence of CR in mice in vivo	Could not see clear evidence of CR in mice in vivo	Could not see clear evidence of CR in mice in vivo	Could not see clear evidence of CR in mice in vivo	Could not see clear evidence of CR in mice in vivo	Could not see clear evidence of CR in mice in vivo	Could not see clear evidence of CR in mice in vivo	Could not see clear evidence of CR in mice in vivo	Could not see clear evidence of CR in mice in vivo	Could not see clear evidence of CR in mice in vivo	Could not see clear evidence of CR in mice in vivo	Could not see clear evidence of CR in mice in vivo	Could not see clear evidence of CR in mice in vivo	Could not see clear evidence of CR in mice in vivo	Could not see clear evidence of CR in mice in vivo	Could not see clear evidence of CR in mice in vivo	Could not see clear evidence of CR in mice in vivo	Could not see clear evidence of CR in mice in vivo	Could not see clear evidence of CR in mice in vivo
254	Chronic Dietary Administration of the Glycolytic Inhibitor 2-Deoxy-D-Glucose (2-DG) Inhibits the Growth of Implanted Ehrlich's Ascites Tumor in Mice.	/pubmed/26135741	create date:2015/07/03 | first author:Singh S	2015	Could not see clear evidence of CR in mice in vivo	Could not see clear evidence of CR in mice in vivo	Could not see clear evidence of CR in mice in vivo	Could not see clear evidence of CR in mice in vivo	Could not see clear evidence of CR in mice in vivo	Could not see clear evidence of CR in mice in vivo	Could not see clear evidence of CR in mice in vivo	Could not see clear evidence of CR in mice in vivo	Could not see clear evidence of CR in mice in vivo	Could not see clear evidence of CR in mice in vivo	Could not see clear evidence of CR in mice in vivo	Could not see clear evidence of CR in mice in vivo	Could not see clear evidence of CR in mice in vivo	Could not see clear evidence of CR in mice in vivo	Could not see clear evidence of CR in mice in vivo	Could not see clear evidence of CR in mice in vivo	Could not see clear evidence of CR in mice in vivo	Could not see clear evidence of CR in mice in vivo	Could not see clear evidence of CR in mice in vivo	Could not see clear evidence of CR in mice in vivo	Could not see clear evidence of CR in mice in vivo	Could not see clear evidence of CR in mice in vivo	Could not see clear evidence of CR in mice in vivo	Could not see clear evidence of CR in mice in vivo
258	On the complex relationship between energy expenditure and longevity: Reconciling the contradictory empirical results with a simple theoretical model.	/pubmed/26086438	create date:2015/06/19 | first author:Hou C	2015	Could not see clear evidence of CR in mice in vivo	Could not see clear evidence of CR in mice in vivo	Could not see clear evidence of CR in mice in vivo	Could not see clear evidence of CR in mice in vivo	Could not see clear evidence of CR in mice in vivo	Could not see clear evidence of CR in mice in vivo	Could not see clear evidence of CR in mice in vivo	Could not see clear evidence of CR in mice in vivo	Could not see clear evidence of CR in mice in vivo	Could not see clear evidence of CR in mice in vivo	Could not see clear evidence of CR in mice in vivo	Could not see clear evidence of CR in mice in vivo	Could not see clear evidence of CR in mice in vivo	Could not see clear evidence of CR in mice in vivo	Could not see clear evidence of CR in mice in vivo	Could not see clear evidence of CR in mice in vivo	Could not see clear evidence of CR in mice in vivo	Could not see clear evidence of CR in mice in vivo	Could not see clear evidence of CR in mice in vivo	Could not see clear evidence of CR in mice in vivo	Could not see clear evidence of CR in mice in vivo	Could not see clear evidence of CR in mice in vivo	Could not see clear evidence of CR in mice in vivo	Could not see clear evidence of CR in mice in vivo
259	Anti-ageing pill pushed as bona fide drug.	/pubmed/26085249	create date:2015/06/19 | first author:Check Hayden E	2015	Could not see clear evidence of CR in mice in vivo	Could not see clear evidence of CR in mice in vivo	Could not see clear evidence of CR in mice in vivo	Could not see clear evidence of CR in mice in vivo	Could not see clear evidence of CR in mice in vivo	Could not see clear evidence of CR in mice in vivo	Could not see clear evidence of CR in mice in vivo	Could not see clear evidence of CR in mice in vivo	Could not see clear evidence of CR in mice in vivo	Could not see clear evidence of CR in mice in vivo	Could not see clear evidence of CR in mice in vivo	Could not see clear evidence of CR in mice in vivo	Could not see clear evidence of CR in mice in vivo	Could not see clear evidence of CR in mice in vivo	Could not see clear evidence of CR in mice in vivo	Could not see clear evidence of CR in mice in vivo	Could not see clear evidence of CR in mice in vivo	Could not see clear evidence of CR in mice in vivo	Could not see clear evidence of CR in mice in vivo	Could not see clear evidence of CR in mice in vivo	Could not see clear evidence of CR in mice in vivo	Could not see clear evidence of CR in mice in vivo	Could not see clear evidence of CR in mice in vivo	Could not see clear evidence of CR in mice in vivo
277	Genomic lesions and colorectal carcinogenesis: the effects of protein-calorie restriction and inulin supplementation on deficiency statuses.	/pubmed/25867388	create date:2015/04/14 | first author:Cantero WB	2015	Could not see clear evidence of CR in mice in vivo	Could not see clear evidence of CR in mice in vivo	Could not see clear evidence of CR in mice in vivo	Could not see clear evidence of CR in mice in vivo	Could not see clear evidence of CR in mice in vivo	Could not see clear evidence of CR in mice in vivo	Could not see clear evidence of CR in mice in vivo	Could not see clear evidence of CR in mice in vivo	Could not see clear evidence of CR in mice in vivo	Could not see clear evidence of CR in mice in vivo	Could not see clear evidence of CR in mice in vivo	Could not see clear evidence of CR in mice in vivo	Could not see clear evidence of CR in mice in vivo	Could not see clear evidence of CR in mice in vivo	Could not see clear evidence of CR in mice in vivo	Could not see clear evidence of CR in mice in vivo	Could not see clear evidence of CR in mice in vivo	Could not see clear evidence of CR in mice in vivo	Could not see clear evidence of CR in mice in vivo	Could not see clear evidence of CR in mice in vivo	Could not see clear evidence of CR in mice in vivo	Could not see clear evidence of CR in mice in vivo	Could not see clear evidence of CR in mice in vivo	Could not see clear evidence of CR in mice in vivo
285	Caloric restriction mimetic 2-deoxyglucose alleviated lethal liver injury induced by lipopolysaccharide/D-galactosamine in mice.	/pubmed/25749337	create date:2015/03/10 | first author:Che Q	2015	Could not see clear evidence of CR in mice in vivo	Could not see clear evidence of CR in mice in vivo	Could not see clear evidence of CR in mice in vivo	Could not see clear evidence of CR in mice in vivo	Could not see clear evidence of CR in mice in vivo	Could not see clear evidence of CR in mice in vivo	Could not see clear evidence of CR in mice in vivo	Could not see clear evidence of CR in mice in vivo	Could not see clear evidence of CR in mice in vivo	Could not see clear evidence of CR in mice in vivo	Could not see clear evidence of CR in mice in vivo	Could not see clear evidence of CR in mice in vivo	Could not see clear evidence of CR in mice in vivo	Could not see clear evidence of CR in mice in vivo	Could not see clear evidence of CR in mice in vivo	Could not see clear evidence of CR in mice in vivo	Could not see clear evidence of CR in mice in vivo	Could not see clear evidence of CR in mice in vivo	Could not see clear evidence of CR in mice in vivo	Could not see clear evidence of CR in mice in vivo	Could not see clear evidence of CR in mice in vivo	Could not see clear evidence of CR in mice in vivo	Could not see clear evidence of CR in mice in vivo	Could not see clear evidence of CR in mice in vivo
288	In vitro caloric restriction induces protective genes and functional rejuvenation in senescent SAMP8 astrocytes.	/pubmed/25711920	create date:2015/02/26 | first author:García-Matas S	2015	Could not see clear evidence of CR in mice in vivo	Could not see clear evidence of CR in mice in vivo	Could not see clear evidence of CR in mice in vivo	Could not see clear evidence of CR in mice in vivo	Could not see clear evidence of CR in mice in vivo	Could not see clear evidence of CR in mice in vivo	Could not see clear evidence of CR in mice in vivo	Could not see clear evidence of CR in mice in vivo	Could not see clear evidence of CR in mice in vivo	Could not see clear evidence of CR in mice in vivo	Could not see clear evidence of CR in mice in vivo	Could not see clear evidence of CR in mice in vivo	Could not see clear evidence of CR in mice in vivo	Could not see clear evidence of CR in mice in vivo	Could not see clear evidence of CR in mice in vivo	Could not see clear evidence of CR in mice in vivo	Could not see clear evidence of CR in mice in vivo	Could not see clear evidence of CR in mice in vivo	Could not see clear evidence of CR in mice in vivo	Could not see clear evidence of CR in mice in vivo	Could not see clear evidence of CR in mice in vivo	Could not see clear evidence of CR in mice in vivo	Could not see clear evidence of CR in mice in vivo	Could not see clear evidence of CR in mice in vivo
293	Caloric restriction mimetic 2-deoxyglucose maintains cytoarchitecture and reduces tau phosphorylation in primary culture of mouse hippocampal pyramidal neurons.	/pubmed/25678460	create date:2015/02/14 | first author:Bele MS	2015	Could not see clear evidence of CR in mice in vivo	Could not see clear evidence of CR in mice in vivo	Could not see clear evidence of CR in mice in vivo	Could not see clear evidence of CR in mice in vivo	Could not see clear evidence of CR in mice in vivo	Could not see clear evidence of CR in mice in vivo	Could not see clear evidence of CR in mice in vivo	Could not see clear evidence of CR in mice in vivo	Could not see clear evidence of CR in mice in vivo	Could not see clear evidence of CR in mice in vivo	Could not see clear evidence of CR in mice in vivo	Could not see clear evidence of CR in mice in vivo	Could not see clear evidence of CR in mice in vivo	Could not see clear evidence of CR in mice in vivo	Could not see clear evidence of CR in mice in vivo	Could not see clear evidence of CR in mice in vivo	Could not see clear evidence of CR in mice in vivo	Could not see clear evidence of CR in mice in vivo	Could not see clear evidence of CR in mice in vivo	Could not see clear evidence of CR in mice in vivo	Could not see clear evidence of CR in mice in vivo	Could not see clear evidence of CR in mice in vivo	Could not see clear evidence of CR in mice in vivo	Could not see clear evidence of CR in mice in vivo
297	Ageing research: Blood to blood.	/pubmed/25612035	create date:2015/01/23 | first author:Scudellari M	2015	Could not see clear evidence of CR in mice in vivo	Could not see clear evidence of CR in mice in vivo	Could not see clear evidence of CR in mice in vivo	Could not see clear evidence of CR in mice in vivo	Could not see clear evidence of CR in mice in vivo	Could not see clear evidence of CR in mice in vivo	Could not see clear evidence of CR in mice in vivo	Could not see clear evidence of CR in mice in vivo	Could not see clear evidence of CR in mice in vivo	Could not see clear evidence of CR in mice in vivo	Could not see clear evidence of CR in mice in vivo	Could not see clear evidence of CR in mice in vivo	Could not see clear evidence of CR in mice in vivo	Could not see clear evidence of CR in mice in vivo	Could not see clear evidence of CR in mice in vivo	Could not see clear evidence of CR in mice in vivo	Could not see clear evidence of CR in mice in vivo	Could not see clear evidence of CR in mice in vivo	Could not see clear evidence of CR in mice in vivo	Could not see clear evidence of CR in mice in vivo	Could not see clear evidence of CR in mice in vivo	Could not see clear evidence of CR in mice in vivo	Could not see clear evidence of CR in mice in vivo	Could not see clear evidence of CR in mice in vivo
304	Why genes extending lifespan in model organisms have not been consistently associated with human longevity and what it means to translation research.	/pubmed/25486354	create date:2014/12/09 | first author:de Magalhães JP	2014	Could not see clear evidence of CR in mice in vivo	Could not see clear evidence of CR in mice in vivo	Could not see clear evidence of CR in mice in vivo	Could not see clear evidence of CR in mice in vivo	Could not see clear evidence of CR in mice in vivo	Could not see clear evidence of CR in mice in vivo	Could not see clear evidence of CR in mice in vivo	Could not see clear evidence of CR in mice in vivo	Could not see clear evidence of CR in mice in vivo	Could not see clear evidence of CR in mice in vivo	Could not see clear evidence of CR in mice in vivo	Could not see clear evidence of CR in mice in vivo	Could not see clear evidence of CR in mice in vivo	Could not see clear evidence of CR in mice in vivo	Could not see clear evidence of CR in mice in vivo	Could not see clear evidence of CR in mice in vivo	Could not see clear evidence of CR in mice in vivo	Could not see clear evidence of CR in mice in vivo	Could not see clear evidence of CR in mice in vivo	Could not see clear evidence of CR in mice in vivo	Could not see clear evidence of CR in mice in vivo	Could not see clear evidence of CR in mice in vivo	Could not see clear evidence of CR in mice in vivo	Could not see clear evidence of CR in mice in vivo
305	Caloric restriction mimetics: natural/physiological pharmacological autophagy inducers.	/pubmed/25484097	create date:2014/12/09 | first author:Mariño G	2014	Could not see clear evidence of CR in mice in vivo	Could not see clear evidence of CR in mice in vivo	Could not see clear evidence of CR in mice in vivo	Could not see clear evidence of CR in mice in vivo	Could not see clear evidence of CR in mice in vivo	Could not see clear evidence of CR in mice in vivo	Could not see clear evidence of CR in mice in vivo	Could not see clear evidence of CR in mice in vivo	Could not see clear evidence of CR in mice in vivo	Could not see clear evidence of CR in mice in vivo	Could not see clear evidence of CR in mice in vivo	Could not see clear evidence of CR in mice in vivo	Could not see clear evidence of CR in mice in vivo	Could not see clear evidence of CR in mice in vivo	Could not see clear evidence of CR in mice in vivo	Could not see clear evidence of CR in mice in vivo	Could not see clear evidence of CR in mice in vivo	Could not see clear evidence of CR in mice in vivo	Could not see clear evidence of CR in mice in vivo	Could not see clear evidence of CR in mice in vivo	Could not see clear evidence of CR in mice in vivo	Could not see clear evidence of CR in mice in vivo	Could not see clear evidence of CR in mice in vivo	Could not see clear evidence of CR in mice in vivo
306	Metformin alleviates hepatosteatosis by restoring SIRT1-mediated autophagy induction via an AMP-activated protein kinase-independent pathway.	/pubmed/25484077	create date:2014/12/09 | first author:Song YM	2014	Could not see clear evidence of CR in mice in vivo	Could not see clear evidence of CR in mice in vivo	Could not see clear evidence of CR in mice in vivo	Could not see clear evidence of CR in mice in vivo	Could not see clear evidence of CR in mice in vivo	Could not see clear evidence of CR in mice in vivo	Could not see clear evidence of CR in mice in vivo	Could not see clear evidence of CR in mice in vivo	Could not see clear evidence of CR in mice in vivo	Could not see clear evidence of CR in mice in vivo	Could not see clear evidence of CR in mice in vivo	Could not see clear evidence of CR in mice in vivo	Could not see clear evidence of CR in mice in vivo	Could not see clear evidence of CR in mice in vivo	Could not see clear evidence of CR in mice in vivo	Could not see clear evidence of CR in mice in vivo	Could not see clear evidence of CR in mice in vivo	Could not see clear evidence of CR in mice in vivo	Could not see clear evidence of CR in mice in vivo	Could not see clear evidence of CR in mice in vivo	Could not see clear evidence of CR in mice in vivo	Could not see clear evidence of CR in mice in vivo	Could not see clear evidence of CR in mice in vivo	Could not see clear evidence of CR in mice in vivo
307	Translational Medicine. A target for pharmacological intervention in an untreatable human disease.	/pubmed/25477449	create date:2014/12/06 | first author:Johnson SC	2014	Could not see clear evidence of CR in mice in vivo	Could not see clear evidence of CR in mice in vivo	Could not see clear evidence of CR in mice in vivo	Could not see clear evidence of CR in mice in vivo	Could not see clear evidence of CR in mice in vivo	Could not see clear evidence of CR in mice in vivo	Could not see clear evidence of CR in mice in vivo	Could not see clear evidence of CR in mice in vivo	Could not see clear evidence of CR in mice in vivo	Could not see clear evidence of CR in mice in vivo	Could not see clear evidence of CR in mice in vivo	Could not see clear evidence of CR in mice in vivo	Could not see clear evidence of CR in mice in vivo	Could not see clear evidence of CR in mice in vivo	Could not see clear evidence of CR in mice in vivo	Could not see clear evidence of CR in mice in vivo	Could not see clear evidence of CR in mice in vivo	Could not see clear evidence of CR in mice in vivo	Could not see clear evidence of CR in mice in vivo	Could not see clear evidence of CR in mice in vivo	Could not see clear evidence of CR in mice in vivo	Could not see clear evidence of CR in mice in vivo	Could not see clear evidence of CR in mice in vivo	Could not see clear evidence of CR in mice in vivo
309	Metformin protects skeletal muscle from cardiotoxin induced degeneration.	/pubmed/25461598	create date:2014/12/03 | first author:Langone F	2014	Could not see clear evidence of CR in mice in vivo	Could not see clear evidence of CR in mice in vivo	Could not see clear evidence of CR in mice in vivo	Could not see clear evidence of CR in mice in vivo	Could not see clear evidence of CR in mice in vivo	Could not see clear evidence of CR in mice in vivo	Could not see clear evidence of CR in mice in vivo	Could not see clear evidence of CR in mice in vivo	Could not see clear evidence of CR in mice in vivo	Could not see clear evidence of CR in mice in vivo	Could not see clear evidence of CR in mice in vivo	Could not see clear evidence of CR in mice in vivo	Could not see clear evidence of CR in mice in vivo	Could not see clear evidence of CR in mice in vivo	Could not see clear evidence of CR in mice in vivo	Could not see clear evidence of CR in mice in vivo	Could not see clear evidence of CR in mice in vivo	Could not see clear evidence of CR in mice in vivo	Could not see clear evidence of CR in mice in vivo	Could not see clear evidence of CR in mice in vivo	Could not see clear evidence of CR in mice in vivo	Could not see clear evidence of CR in mice in vivo	Could not see clear evidence of CR in mice in vivo	Could not see clear evidence of CR in mice in vivo
311	Moderate maternal food restriction in mice impairs physical growth, behavior, and neurodevelopment of offspring.	/pubmed/25433908	create date:2014/12/01 | first author:Akitake Y	2014	Could not see clear evidence of CR in mice in vivo	Could not see clear evidence of CR in mice in vivo	Could not see clear evidence of CR in mice in vivo	Could not see clear evidence of CR in mice in vivo	Could not see clear evidence of CR in mice in vivo	Could not see clear evidence of CR in mice in vivo	Could not see clear evidence of CR in mice in vivo	Could not see clear evidence of CR in mice in vivo	Could not see clear evidence of CR in mice in vivo	Could not see clear evidence of CR in mice in vivo	Could not see clear evidence of CR in mice in vivo	Could not see clear evidence of CR in mice in vivo	Could not see clear evidence of CR in mice in vivo	Could not see clear evidence of CR in mice in vivo	Could not see clear evidence of CR in mice in vivo	Could not see clear evidence of CR in mice in vivo	Could not see clear evidence of CR in mice in vivo	Could not see clear evidence of CR in mice in vivo	Could not see clear evidence of CR in mice in vivo	Could not see clear evidence of CR in mice in vivo	Could not see clear evidence of CR in mice in vivo	Could not see clear evidence of CR in mice in vivo	Could not see clear evidence of CR in mice in vivo	Could not see clear evidence of CR in mice in vivo
317	Brain-Derived Neurotrophic Factor in Alzheimer's Disease: Risk, Mechanisms, and Therapy.	/pubmed/25354497	create date:2014/10/31 | first author:Song JH	2014	Could not see clear evidence of CR in mice in vivo	Could not see clear evidence of CR in mice in vivo	Could not see clear evidence of CR in mice in vivo	Could not see clear evidence of CR in mice in vivo	Could not see clear evidence of CR in mice in vivo	Could not see clear evidence of CR in mice in vivo	Could not see clear evidence of CR in mice in vivo	Could not see clear evidence of CR in mice in vivo	Could not see clear evidence of CR in mice in vivo	Could not see clear evidence of CR in mice in vivo	Could not see clear evidence of CR in mice in vivo	Could not see clear evidence of CR in mice in vivo	Could not see clear evidence of CR in mice in vivo	Could not see clear evidence of CR in mice in vivo	Could not see clear evidence of CR in mice in vivo	Could not see clear evidence of CR in mice in vivo	Could not see clear evidence of CR in mice in vivo	Could not see clear evidence of CR in mice in vivo	Could not see clear evidence of CR in mice in vivo	Could not see clear evidence of CR in mice in vivo	Could not see clear evidence of CR in mice in vivo	Could not see clear evidence of CR in mice in vivo	Could not see clear evidence of CR in mice in vivo	Could not see clear evidence of CR in mice in vivo
326	FGF21 is an endocrine signal of protein restriction.	/pubmed/25133427	create date:2014/08/19 | first author:Laeger T	2014	Could not see clear evidence of CR in mice in vivo	Could not see clear evidence of CR in mice in vivo	Could not see clear evidence of CR in mice in vivo	Could not see clear evidence of CR in mice in vivo	Could not see clear evidence of CR in mice in vivo	Could not see clear evidence of CR in mice in vivo	Could not see clear evidence of CR in mice in vivo	Could not see clear evidence of CR in mice in vivo	Could not see clear evidence of CR in mice in vivo	Could not see clear evidence of CR in mice in vivo	Could not see clear evidence of CR in mice in vivo	Could not see clear evidence of CR in mice in vivo	Could not see clear evidence of CR in mice in vivo	Could not see clear evidence of CR in mice in vivo	Could not see clear evidence of CR in mice in vivo	Could not see clear evidence of CR in mice in vivo	Could not see clear evidence of CR in mice in vivo	Could not see clear evidence of CR in mice in vivo	Could not see clear evidence of CR in mice in vivo	Could not see clear evidence of CR in mice in vivo	Could not see clear evidence of CR in mice in vivo	Could not see clear evidence of CR in mice in vivo	Could not see clear evidence of CR in mice in vivo	Could not see clear evidence of CR in mice in vivo
328	Preoperative dietary restriction reduces intimal hyperplasia and protects from ischemia-reperfusion injury.	/pubmed/25124359	create date:2014/08/16 | first author:Mauro CR	2014	Could not see clear evidence of CR in mice in vivo	Could not see clear evidence of CR in mice in vivo	Could not see clear evidence of CR in mice in vivo	Could not see clear evidence of CR in mice in vivo	Could not see clear evidence of CR in mice in vivo	Could not see clear evidence of CR in mice in vivo	Could not see clear evidence of CR in mice in vivo	Could not see clear evidence of CR in mice in vivo	Could not see clear evidence of CR in mice in vivo	Could not see clear evidence of CR in mice in vivo	Could not see clear evidence of CR in mice in vivo	Could not see clear evidence of CR in mice in vivo	Could not see clear evidence of CR in mice in vivo	Could not see clear evidence of CR in mice in vivo	Could not see clear evidence of CR in mice in vivo	Could not see clear evidence of CR in mice in vivo	Could not see clear evidence of CR in mice in vivo	Could not see clear evidence of CR in mice in vivo	Could not see clear evidence of CR in mice in vivo	Could not see clear evidence of CR in mice in vivo	Could not see clear evidence of CR in mice in vivo	Could not see clear evidence of CR in mice in vivo	Could not see clear evidence of CR in mice in vivo	Could not see clear evidence of CR in mice in vivo
329	Low birth weight is associated with adiposity, impaired skeletal muscle energetics and weight loss resistance in mice.	/pubmed/25091727	create date:2014/08/06 | first author:Beauchamp B	2014	Could not see clear evidence of CR in mice in vivo	Could not see clear evidence of CR in mice in vivo	Could not see clear evidence of CR in mice in vivo	Could not see clear evidence of CR in mice in vivo	Could not see clear evidence of CR in mice in vivo	Could not see clear evidence of CR in mice in vivo	Could not see clear evidence of CR in mice in vivo	Could not see clear evidence of CR in mice in vivo	Could not see clear evidence of CR in mice in vivo	Could not see clear evidence of CR in mice in vivo	Could not see clear evidence of CR in mice in vivo	Could not see clear evidence of CR in mice in vivo	Could not see clear evidence of CR in mice in vivo	Could not see clear evidence of CR in mice in vivo	Could not see clear evidence of CR in mice in vivo	Could not see clear evidence of CR in mice in vivo	Could not see clear evidence of CR in mice in vivo	Could not see clear evidence of CR in mice in vivo	Could not see clear evidence of CR in mice in vivo	Could not see clear evidence of CR in mice in vivo	Could not see clear evidence of CR in mice in vivo	Could not see clear evidence of CR in mice in vivo	Could not see clear evidence of CR in mice in vivo	Could not see clear evidence of CR in mice in vivo
332	Striatal dopamine homeostasis is altered in mice following Roux-en-Y gastric bypass surgery.	/pubmed/25068716	create date:2014/07/30 | first author:Reddy IA	2014	Could not see clear evidence of CR in mice in vivo	Could not see clear evidence of CR in mice in vivo	Could not see clear evidence of CR in mice in vivo	Could not see clear evidence of CR in mice in vivo	Could not see clear evidence of CR in mice in vivo	Could not see clear evidence of CR in mice in vivo	Could not see clear evidence of CR in mice in vivo	Could not see clear evidence of CR in mice in vivo	Could not see clear evidence of CR in mice in vivo	Could not see clear evidence of CR in mice in vivo	Could not see clear evidence of CR in mice in vivo	Could not see clear evidence of CR in mice in vivo	Could not see clear evidence of CR in mice in vivo	Could not see clear evidence of CR in mice in vivo	Could not see clear evidence of CR in mice in vivo	Could not see clear evidence of CR in mice in vivo	Could not see clear evidence of CR in mice in vivo	Could not see clear evidence of CR in mice in vivo	Could not see clear evidence of CR in mice in vivo	Could not see clear evidence of CR in mice in vivo	Could not see clear evidence of CR in mice in vivo	Could not see clear evidence of CR in mice in vivo	Could not see clear evidence of CR in mice in vivo	Could not see clear evidence of CR in mice in vivo
335	In utero effects. In utero undernourishment perturbs the adult sperm methylome and intergenerational metabolism.	/pubmed/25011554	create date:2014/07/12 | first author:Radford EJ	2014	Could not see clear evidence of CR in mice in vivo	Could not see clear evidence of CR in mice in vivo	Could not see clear evidence of CR in mice in vivo	Could not see clear evidence of CR in mice in vivo	Could not see clear evidence of CR in mice in vivo	Could not see clear evidence of CR in mice in vivo	Could not see clear evidence of CR in mice in vivo	Could not see clear evidence of CR in mice in vivo	Could not see clear evidence of CR in mice in vivo	Could not see clear evidence of CR in mice in vivo	Could not see clear evidence of CR in mice in vivo	Could not see clear evidence of CR in mice in vivo	Could not see clear evidence of CR in mice in vivo	Could not see clear evidence of CR in mice in vivo	Could not see clear evidence of CR in mice in vivo	Could not see clear evidence of CR in mice in vivo	Could not see clear evidence of CR in mice in vivo	Could not see clear evidence of CR in mice in vivo	Could not see clear evidence of CR in mice in vivo	Could not see clear evidence of CR in mice in vivo	Could not see clear evidence of CR in mice in vivo	Could not see clear evidence of CR in mice in vivo	Could not see clear evidence of CR in mice in vivo	Could not see clear evidence of CR in mice in vivo
340	Glucose reduces the anticonvulsant effects of the ketogenic diet in EL mice.	/pubmed/24938543	create date:2014/06/19 | first author:Mantis JG	2014	Could not see clear evidence of CR in mice in vivo	Could not see clear evidence of CR in mice in vivo	Could not see clear evidence of CR in mice in vivo	Could not see clear evidence of CR in mice in vivo	Could not see clear evidence of CR in mice in vivo	Could not see clear evidence of CR in mice in vivo	Could not see clear evidence of CR in mice in vivo	Could not see clear evidence of CR in mice in vivo	Could not see clear evidence of CR in mice in vivo	Could not see clear evidence of CR in mice in vivo	Could not see clear evidence of CR in mice in vivo	Could not see clear evidence of CR in mice in vivo	Could not see clear evidence of CR in mice in vivo	Could not see clear evidence of CR in mice in vivo	Could not see clear evidence of CR in mice in vivo	Could not see clear evidence of CR in mice in vivo	Could not see clear evidence of CR in mice in vivo	Could not see clear evidence of CR in mice in vivo	Could not see clear evidence of CR in mice in vivo	Could not see clear evidence of CR in mice in vivo	Could not see clear evidence of CR in mice in vivo	Could not see clear evidence of CR in mice in vivo	Could not see clear evidence of CR in mice in vivo	Could not see clear evidence of CR in mice in vivo
345	Methionine restriction activates the retrograde response and confers both stress tolerance and lifespan extension to yeast, mouse and human cells.	/pubmed/24830393	create date:2014/05/17 | first author:Johnson JE	2014	Could not see clear evidence of CR in mice in vivo	Could not see clear evidence of CR in mice in vivo	Could not see clear evidence of CR in mice in vivo	Could not see clear evidence of CR in mice in vivo	Could not see clear evidence of CR in mice in vivo	Could not see clear evidence of CR in mice in vivo	Could not see clear evidence of CR in mice in vivo	Could not see clear evidence of CR in mice in vivo	Could not see clear evidence of CR in mice in vivo	Could not see clear evidence of CR in mice in vivo	Could not see clear evidence of CR in mice in vivo	Could not see clear evidence of CR in mice in vivo	Could not see clear evidence of CR in mice in vivo	Could not see clear evidence of CR in mice in vivo	Could not see clear evidence of CR in mice in vivo	Could not see clear evidence of CR in mice in vivo	Could not see clear evidence of CR in mice in vivo	Could not see clear evidence of CR in mice in vivo	Could not see clear evidence of CR in mice in vivo	Could not see clear evidence of CR in mice in vivo	Could not see clear evidence of CR in mice in vivo	Could not see clear evidence of CR in mice in vivo	Could not see clear evidence of CR in mice in vivo	Could not see clear evidence of CR in mice in vivo
349	Preservation of blood glucose homeostasis in slow-senescing somatotrophism-deficient mice subjected to intermittent fasting begun at middle or old age.	/pubmed/24789008	create date:2014/05/03 | first author:Arum O	2014	Could not see clear evidence of CR in mice in vivo	Could not see clear evidence of CR in mice in vivo	Could not see clear evidence of CR in mice in vivo	Could not see clear evidence of CR in mice in vivo	Could not see clear evidence of CR in mice in vivo	Could not see clear evidence of CR in mice in vivo	Could not see clear evidence of CR in mice in vivo	Could not see clear evidence of CR in mice in vivo	Could not see clear evidence of CR in mice in vivo	Could not see clear evidence of CR in mice in vivo	Could not see clear evidence of CR in mice in vivo	Could not see clear evidence of CR in mice in vivo	Could not see clear evidence of CR in mice in vivo	Could not see clear evidence of CR in mice in vivo	Could not see clear evidence of CR in mice in vivo	Could not see clear evidence of CR in mice in vivo	Could not see clear evidence of CR in mice in vivo	Could not see clear evidence of CR in mice in vivo	Could not see clear evidence of CR in mice in vivo	Could not see clear evidence of CR in mice in vivo	Could not see clear evidence of CR in mice in vivo	Could not see clear evidence of CR in mice in vivo	Could not see clear evidence of CR in mice in vivo	Could not see clear evidence of CR in mice in vivo
351	Seeking genes responsible for developmental origins of health and disease from the fetal mouse liver following maternal food restriction.	/pubmed/24754856	create date:2014/04/24 | first author:Ogawa T	2014	Could not see clear evidence of CR in mice in vivo	Could not see clear evidence of CR in mice in vivo	Could not see clear evidence of CR in mice in vivo	Could not see clear evidence of CR in mice in vivo	Could not see clear evidence of CR in mice in vivo	Could not see clear evidence of CR in mice in vivo	Could not see clear evidence of CR in mice in vivo	Could not see clear evidence of CR in mice in vivo	Could not see clear evidence of CR in mice in vivo	Could not see clear evidence of CR in mice in vivo	Could not see clear evidence of CR in mice in vivo	Could not see clear evidence of CR in mice in vivo	Could not see clear evidence of CR in mice in vivo	Could not see clear evidence of CR in mice in vivo	Could not see clear evidence of CR in mice in vivo	Could not see clear evidence of CR in mice in vivo	Could not see clear evidence of CR in mice in vivo	Could not see clear evidence of CR in mice in vivo	Could not see clear evidence of CR in mice in vivo	Could not see clear evidence of CR in mice in vivo	Could not see clear evidence of CR in mice in vivo	Could not see clear evidence of CR in mice in vivo	Could not see clear evidence of CR in mice in vivo	Could not see clear evidence of CR in mice in vivo
364	Age-dependent effect of every-other-day feeding and aerobic exercise in ubiquinone levels and related antioxidant activities in mice muscle.	/pubmed/24496576	create date:2014/02/06 | first author:Rodríguez-Bies E	2014	Could not see clear evidence of CR in mice in vivo	Could not see clear evidence of CR in mice in vivo	Could not see clear evidence of CR in mice in vivo	Could not see clear evidence of CR in mice in vivo	Could not see clear evidence of CR in mice in vivo	Could not see clear evidence of CR in mice in vivo	Could not see clear evidence of CR in mice in vivo	Could not see clear evidence of CR in mice in vivo	Could not see clear evidence of CR in mice in vivo	Could not see clear evidence of CR in mice in vivo	Could not see clear evidence of CR in mice in vivo	Could not see clear evidence of CR in mice in vivo	Could not see clear evidence of CR in mice in vivo	Could not see clear evidence of CR in mice in vivo	Could not see clear evidence of CR in mice in vivo	Could not see clear evidence of CR in mice in vivo	Could not see clear evidence of CR in mice in vivo	Could not see clear evidence of CR in mice in vivo	Could not see clear evidence of CR in mice in vivo	Could not see clear evidence of CR in mice in vivo	Could not see clear evidence of CR in mice in vivo	Could not see clear evidence of CR in mice in vivo	Could not see clear evidence of CR in mice in vivo	Could not see clear evidence of CR in mice in vivo
368	Evolution of human longevity uncoupled from caloric restriction mechanisms.	/pubmed/24400080	create date:2014/01/09 | first author:Zhao G	2014	Could not see clear evidence of CR in mice in vivo	Could not see clear evidence of CR in mice in vivo	Could not see clear evidence of CR in mice in vivo	Could not see clear evidence of CR in mice in vivo	Could not see clear evidence of CR in mice in vivo	Could not see clear evidence of CR in mice in vivo	Could not see clear evidence of CR in mice in vivo	Could not see clear evidence of CR in mice in vivo	Could not see clear evidence of CR in mice in vivo	Could not see clear evidence of CR in mice in vivo	Could not see clear evidence of CR in mice in vivo	Could not see clear evidence of CR in mice in vivo	Could not see clear evidence of CR in mice in vivo	Could not see clear evidence of CR in mice in vivo	Could not see clear evidence of CR in mice in vivo	Could not see clear evidence of CR in mice in vivo	Could not see clear evidence of CR in mice in vivo	Could not see clear evidence of CR in mice in vivo	Could not see clear evidence of CR in mice in vivo	Could not see clear evidence of CR in mice in vivo	Could not see clear evidence of CR in mice in vivo	Could not see clear evidence of CR in mice in vivo	Could not see clear evidence of CR in mice in vivo	Could not see clear evidence of CR in mice in vivo
369	Subfatin is a novel adipokine and unlike Meteorin in adipose and brain expression.	/pubmed/24393292	create date:2014/01/08 | first author:Li ZY	2014	Could not see clear evidence of CR in mice in vivo	Could not see clear evidence of CR in mice in vivo	Could not see clear evidence of CR in mice in vivo	Could not see clear evidence of CR in mice in vivo	Could not see clear evidence of CR in mice in vivo	Could not see clear evidence of CR in mice in vivo	Could not see clear evidence of CR in mice in vivo	Could not see clear evidence of CR in mice in vivo	Could not see clear evidence of CR in mice in vivo	Could not see clear evidence of CR in mice in vivo	Could not see clear evidence of CR in mice in vivo	Could not see clear evidence of CR in mice in vivo	Could not see clear evidence of CR in mice in vivo	Could not see clear evidence of CR in mice in vivo	Could not see clear evidence of CR in mice in vivo	Could not see clear evidence of CR in mice in vivo	Could not see clear evidence of CR in mice in vivo	Could not see clear evidence of CR in mice in vivo	Could not see clear evidence of CR in mice in vivo	Could not see clear evidence of CR in mice in vivo	Could not see clear evidence of CR in mice in vivo	Could not see clear evidence of CR in mice in vivo	Could not see clear evidence of CR in mice in vivo	Could not see clear evidence of CR in mice in vivo
372	The anti-aging effects of Ludwigia octovalvis on Drosophila melanogaster and SAMP8 mice.	/pubmed/24338263	create date:2013/12/18 | first author:Lin WS	2013	Could not see clear evidence of CR in mice in vivo	Could not see clear evidence of CR in mice in vivo	Could not see clear evidence of CR in mice in vivo	Could not see clear evidence of CR in mice in vivo	Could not see clear evidence of CR in mice in vivo	Could not see clear evidence of CR in mice in vivo	Could not see clear evidence of CR in mice in vivo	Could not see clear evidence of CR in mice in vivo	Could not see clear evidence of CR in mice in vivo	Could not see clear evidence of CR in mice in vivo	Could not see clear evidence of CR in mice in vivo	Could not see clear evidence of CR in mice in vivo	Could not see clear evidence of CR in mice in vivo	Could not see clear evidence of CR in mice in vivo	Could not see clear evidence of CR in mice in vivo	Could not see clear evidence of CR in mice in vivo	Could not see clear evidence of CR in mice in vivo	Could not see clear evidence of CR in mice in vivo	Could not see clear evidence of CR in mice in vivo	Could not see clear evidence of CR in mice in vivo	Could not see clear evidence of CR in mice in vivo	Could not see clear evidence of CR in mice in vivo	Could not see clear evidence of CR in mice in vivo	Could not see clear evidence of CR in mice in vivo
374	Role of prenatal undernutrition in the expression of serotonin, dopamine and leptin receptors in adult mice: implications of food intake.	/pubmed/24337628	create date:2013/12/18 | first author:Manuel-Apolinar L	2013	Could not see clear evidence of CR in mice in vivo	Could not see clear evidence of CR in mice in vivo	Could not see clear evidence of CR in mice in vivo	Could not see clear evidence of CR in mice in vivo	Could not see clear evidence of CR in mice in vivo	Could not see clear evidence of CR in mice in vivo	Could not see clear evidence of CR in mice in vivo	Could not see clear evidence of CR in mice in vivo	Could not see clear evidence of CR in mice in vivo	Could not see clear evidence of CR in mice in vivo	Could not see clear evidence of CR in mice in vivo	Could not see clear evidence of CR in mice in vivo	Could not see clear evidence of CR in mice in vivo	Could not see clear evidence of CR in mice in vivo	Could not see clear evidence of CR in mice in vivo	Could not see clear evidence of CR in mice in vivo	Could not see clear evidence of CR in mice in vivo	Could not see clear evidence of CR in mice in vivo	Could not see clear evidence of CR in mice in vivo	Could not see clear evidence of CR in mice in vivo	Could not see clear evidence of CR in mice in vivo	Could not see clear evidence of CR in mice in vivo	Could not see clear evidence of CR in mice in vivo	Could not see clear evidence of CR in mice in vivo
376	Transposable elements become active and mobile in the genomes of aging mammalian somatic tissues.	/pubmed/24323947	create date:2013/12/11 | first author:De Cecco M	2013	Could not see clear evidence of CR in mice in vivo	Could not see clear evidence of CR in mice in vivo	Could not see clear evidence of CR in mice in vivo	Could not see clear evidence of CR in mice in vivo	Could not see clear evidence of CR in mice in vivo	Could not see clear evidence of CR in mice in vivo	Could not see clear evidence of CR in mice in vivo	Could not see clear evidence of CR in mice in vivo	Could not see clear evidence of CR in mice in vivo	Could not see clear evidence of CR in mice in vivo	Could not see clear evidence of CR in mice in vivo	Could not see clear evidence of CR in mice in vivo	Could not see clear evidence of CR in mice in vivo	Could not see clear evidence of CR in mice in vivo	Could not see clear evidence of CR in mice in vivo	Could not see clear evidence of CR in mice in vivo	Could not see clear evidence of CR in mice in vivo	Could not see clear evidence of CR in mice in vivo	Could not see clear evidence of CR in mice in vivo	Could not see clear evidence of CR in mice in vivo	Could not see clear evidence of CR in mice in vivo	Could not see clear evidence of CR in mice in vivo	Could not see clear evidence of CR in mice in vivo	Could not see clear evidence of CR in mice in vivo
390	The fountain of youth: role of sirtuins in aging and regenerative medicine.	/pubmed/24147522	create date:2013/10/24 | first author:Della-Morte D	2013	Could not see clear evidence of CR in mice in vivo	Could not see clear evidence of CR in mice in vivo	Could not see clear evidence of CR in mice in vivo	Could not see clear evidence of CR in mice in vivo	Could not see clear evidence of CR in mice in vivo	Could not see clear evidence of CR in mice in vivo	Could not see clear evidence of CR in mice in vivo	Could not see clear evidence of CR in mice in vivo	Could not see clear evidence of CR in mice in vivo	Could not see clear evidence of CR in mice in vivo	Could not see clear evidence of CR in mice in vivo	Could not see clear evidence of CR in mice in vivo	Could not see clear evidence of CR in mice in vivo	Could not see clear evidence of CR in mice in vivo	Could not see clear evidence of CR in mice in vivo	Could not see clear evidence of CR in mice in vivo	Could not see clear evidence of CR in mice in vivo	Could not see clear evidence of CR in mice in vivo	Could not see clear evidence of CR in mice in vivo	Could not see clear evidence of CR in mice in vivo	Could not see clear evidence of CR in mice in vivo	Could not see clear evidence of CR in mice in vivo	Could not see clear evidence of CR in mice in vivo	Could not see clear evidence of CR in mice in vivo
395	Utilizing calorie restriction to evaluate the role of sirtuins in healthspan and lifespan of mice.	/pubmed/24014415	create date:2013/09/10 | first author:Curtis J	2013	Could not see clear evidence of CR in mice in vivo	Could not see clear evidence of CR in mice in vivo	Could not see clear evidence of CR in mice in vivo	Could not see clear evidence of CR in mice in vivo	Could not see clear evidence of CR in mice in vivo	Could not see clear evidence of CR in mice in vivo	Could not see clear evidence of CR in mice in vivo	Could not see clear evidence of CR in mice in vivo	Could not see clear evidence of CR in mice in vivo	Could not see clear evidence of CR in mice in vivo	Could not see clear evidence of CR in mice in vivo	Could not see clear evidence of CR in mice in vivo	Could not see clear evidence of CR in mice in vivo	Could not see clear evidence of CR in mice in vivo	Could not see clear evidence of CR in mice in vivo	Could not see clear evidence of CR in mice in vivo	Could not see clear evidence of CR in mice in vivo	Could not see clear evidence of CR in mice in vivo	Could not see clear evidence of CR in mice in vivo	Could not see clear evidence of CR in mice in vivo	Could not see clear evidence of CR in mice in vivo	Could not see clear evidence of CR in mice in vivo	Could not see clear evidence of CR in mice in vivo	Could not see clear evidence of CR in mice in vivo
401	The use of calorie restriction mimetics to study aging.	/pubmed/23929100	create date:2013/08/10 | first author:Kitada M	2013	Could not see clear evidence of CR in mice in vivo	Could not see clear evidence of CR in mice in vivo	Could not see clear evidence of CR in mice in vivo	Could not see clear evidence of CR in mice in vivo	Could not see clear evidence of CR in mice in vivo	Could not see clear evidence of CR in mice in vivo	Could not see clear evidence of CR in mice in vivo	Could not see clear evidence of CR in mice in vivo	Could not see clear evidence of CR in mice in vivo	Could not see clear evidence of CR in mice in vivo	Could not see clear evidence of CR in mice in vivo	Could not see clear evidence of CR in mice in vivo	Could not see clear evidence of CR in mice in vivo	Could not see clear evidence of CR in mice in vivo	Could not see clear evidence of CR in mice in vivo	Could not see clear evidence of CR in mice in vivo	Could not see clear evidence of CR in mice in vivo	Could not see clear evidence of CR in mice in vivo	Could not see clear evidence of CR in mice in vivo	Could not see clear evidence of CR in mice in vivo	Could not see clear evidence of CR in mice in vivo	Could not see clear evidence of CR in mice in vivo	Could not see clear evidence of CR in mice in vivo	Could not see clear evidence of CR in mice in vivo
408	The energy trade-off between growth and longevity.	/pubmed/23872259	create date:2013/07/23 | first author:Hou C	2013	Could not see clear evidence of CR in mice in vivo	Could not see clear evidence of CR in mice in vivo	Could not see clear evidence of CR in mice in vivo	Could not see clear evidence of CR in mice in vivo	Could not see clear evidence of CR in mice in vivo	Could not see clear evidence of CR in mice in vivo	Could not see clear evidence of CR in mice in vivo	Could not see clear evidence of CR in mice in vivo	Could not see clear evidence of CR in mice in vivo	Could not see clear evidence of CR in mice in vivo	Could not see clear evidence of CR in mice in vivo	Could not see clear evidence of CR in mice in vivo	Could not see clear evidence of CR in mice in vivo	Could not see clear evidence of CR in mice in vivo	Could not see clear evidence of CR in mice in vivo	Could not see clear evidence of CR in mice in vivo	Could not see clear evidence of CR in mice in vivo	Could not see clear evidence of CR in mice in vivo	Could not see clear evidence of CR in mice in vivo	Could not see clear evidence of CR in mice in vivo	Could not see clear evidence of CR in mice in vivo	Could not see clear evidence of CR in mice in vivo	Could not see clear evidence of CR in mice in vivo	Could not see clear evidence of CR in mice in vivo
412	An eGFP-expressing subpopulation of growth hormone secretagogue receptor cells are distinct from kisspeptin, tyrosine hydroxylase, and RFamide-related peptide neurons in mice.	/pubmed/23831041	create date:2013/07/09 | first author:Smith JT	2013	Could not see clear evidence of CR in mice in vivo	Could not see clear evidence of CR in mice in vivo	Could not see clear evidence of CR in mice in vivo	Could not see clear evidence of CR in mice in vivo	Could not see clear evidence of CR in mice in vivo	Could not see clear evidence of CR in mice in vivo	Could not see clear evidence of CR in mice in vivo	Could not see clear evidence of CR in mice in vivo	Could not see clear evidence of CR in mice in vivo	Could not see clear evidence of CR in mice in vivo	Could not see clear evidence of CR in mice in vivo	Could not see clear evidence of CR in mice in vivo	Could not see clear evidence of CR in mice in vivo	Could not see clear evidence of CR in mice in vivo	Could not see clear evidence of CR in mice in vivo	Could not see clear evidence of CR in mice in vivo	Could not see clear evidence of CR in mice in vivo	Could not see clear evidence of CR in mice in vivo	Could not see clear evidence of CR in mice in vivo	Could not see clear evidence of CR in mice in vivo	Could not see clear evidence of CR in mice in vivo	Could not see clear evidence of CR in mice in vivo	Could not see clear evidence of CR in mice in vivo	Could not see clear evidence of CR in mice in vivo
416	Vertical sleeve gastrectomy reduces hepatic steatosis while increasing serum bile acids in a weight-loss-independent manner.	/pubmed/23804416	create date:2013/06/28 | first author:Myronovych A	2013	Could not see clear evidence of CR in mice in vivo	Could not see clear evidence of CR in mice in vivo	Could not see clear evidence of CR in mice in vivo	Could not see clear evidence of CR in mice in vivo	Could not see clear evidence of CR in mice in vivo	Could not see clear evidence of CR in mice in vivo	Could not see clear evidence of CR in mice in vivo	Could not see clear evidence of CR in mice in vivo	Could not see clear evidence of CR in mice in vivo	Could not see clear evidence of CR in mice in vivo	Could not see clear evidence of CR in mice in vivo	Could not see clear evidence of CR in mice in vivo	Could not see clear evidence of CR in mice in vivo	Could not see clear evidence of CR in mice in vivo	Could not see clear evidence of CR in mice in vivo	Could not see clear evidence of CR in mice in vivo	Could not see clear evidence of CR in mice in vivo	Could not see clear evidence of CR in mice in vivo	Could not see clear evidence of CR in mice in vivo	Could not see clear evidence of CR in mice in vivo	Could not see clear evidence of CR in mice in vivo	Could not see clear evidence of CR in mice in vivo	Could not see clear evidence of CR in mice in vivo	Could not see clear evidence of CR in mice in vivo
419	Maternal dietary restriction alters offspring's sleep homeostasis.	/pubmed/23741310	create date:2013/06/07 | first author:Shimizu N	2013	Could not see clear evidence of CR in mice in vivo	Could not see clear evidence of CR in mice in vivo	Could not see clear evidence of CR in mice in vivo	Could not see clear evidence of CR in mice in vivo	Could not see clear evidence of CR in mice in vivo	Could not see clear evidence of CR in mice in vivo	Could not see clear evidence of CR in mice in vivo	Could not see clear evidence of CR in mice in vivo	Could not see clear evidence of CR in mice in vivo	Could not see clear evidence of CR in mice in vivo	Could not see clear evidence of CR in mice in vivo	Could not see clear evidence of CR in mice in vivo	Could not see clear evidence of CR in mice in vivo	Could not see clear evidence of CR in mice in vivo	Could not see clear evidence of CR in mice in vivo	Could not see clear evidence of CR in mice in vivo	Could not see clear evidence of CR in mice in vivo	Could not see clear evidence of CR in mice in vivo	Could not see clear evidence of CR in mice in vivo	Could not see clear evidence of CR in mice in vivo	Could not see clear evidence of CR in mice in vivo	Could not see clear evidence of CR in mice in vivo	Could not see clear evidence of CR in mice in vivo	Could not see clear evidence of CR in mice in vivo
427	Nutritional intervention restores muscle but not kidney phenotypes in adult calcineurin Aα null mice.	/pubmed/23638102	create date:2013/05/03 | first author:Madsen K	2013	Could not see clear evidence of CR in mice in vivo	Could not see clear evidence of CR in mice in vivo	Could not see clear evidence of CR in mice in vivo	Could not see clear evidence of CR in mice in vivo	Could not see clear evidence of CR in mice in vivo	Could not see clear evidence of CR in mice in vivo	Could not see clear evidence of CR in mice in vivo	Could not see clear evidence of CR in mice in vivo	Could not see clear evidence of CR in mice in vivo	Could not see clear evidence of CR in mice in vivo	Could not see clear evidence of CR in mice in vivo	Could not see clear evidence of CR in mice in vivo	Could not see clear evidence of CR in mice in vivo	Could not see clear evidence of CR in mice in vivo	Could not see clear evidence of CR in mice in vivo	Could not see clear evidence of CR in mice in vivo	Could not see clear evidence of CR in mice in vivo	Could not see clear evidence of CR in mice in vivo	Could not see clear evidence of CR in mice in vivo	Could not see clear evidence of CR in mice in vivo	Could not see clear evidence of CR in mice in vivo	Could not see clear evidence of CR in mice in vivo	Could not see clear evidence of CR in mice in vivo	Could not see clear evidence of CR in mice in vivo
428	Calorie restriction (CR) and CR mimetics for the prevention and treatment of age-related eye disorders.	/pubmed/23588119	create date:2013/04/17 | first author:Kawashima M	2013	Could not see clear evidence of CR in mice in vivo	Could not see clear evidence of CR in mice in vivo	Could not see clear evidence of CR in mice in vivo	Could not see clear evidence of CR in mice in vivo	Could not see clear evidence of CR in mice in vivo	Could not see clear evidence of CR in mice in vivo	Could not see clear evidence of CR in mice in vivo	Could not see clear evidence of CR in mice in vivo	Could not see clear evidence of CR in mice in vivo	Could not see clear evidence of CR in mice in vivo	Could not see clear evidence of CR in mice in vivo	Could not see clear evidence of CR in mice in vivo	Could not see clear evidence of CR in mice in vivo	Could not see clear evidence of CR in mice in vivo	Could not see clear evidence of CR in mice in vivo	Could not see clear evidence of CR in mice in vivo	Could not see clear evidence of CR in mice in vivo	Could not see clear evidence of CR in mice in vivo	Could not see clear evidence of CR in mice in vivo	Could not see clear evidence of CR in mice in vivo	Could not see clear evidence of CR in mice in vivo	Could not see clear evidence of CR in mice in vivo	Could not see clear evidence of CR in mice in vivo	Could not see clear evidence of CR in mice in vivo
430	Intermittent fasting: the science of going without.	/pubmed/23569168	create date:2013/04/10 | first author:Collier R	2013	Could not see clear evidence of CR in mice in vivo	Could not see clear evidence of CR in mice in vivo	Could not see clear evidence of CR in mice in vivo	Could not see clear evidence of CR in mice in vivo	Could not see clear evidence of CR in mice in vivo	Could not see clear evidence of CR in mice in vivo	Could not see clear evidence of CR in mice in vivo	Could not see clear evidence of CR in mice in vivo	Could not see clear evidence of CR in mice in vivo	Could not see clear evidence of CR in mice in vivo	Could not see clear evidence of CR in mice in vivo	Could not see clear evidence of CR in mice in vivo	Could not see clear evidence of CR in mice in vivo	Could not see clear evidence of CR in mice in vivo	Could not see clear evidence of CR in mice in vivo	Could not see clear evidence of CR in mice in vivo	Could not see clear evidence of CR in mice in vivo	Could not see clear evidence of CR in mice in vivo	Could not see clear evidence of CR in mice in vivo	Could not see clear evidence of CR in mice in vivo	Could not see clear evidence of CR in mice in vivo	Could not see clear evidence of CR in mice in vivo	Could not see clear evidence of CR in mice in vivo	Could not see clear evidence of CR in mice in vivo
431	Renal parenchyma developmental plasticity in mice infected with Schistosoma mansoni, whose mothers were malnourished during lactation.	/pubmed/23567250	create date:2013/04/10 | first author:Corrêa CL	2013	Could not see clear evidence of CR in mice in vivo	Could not see clear evidence of CR in mice in vivo	Could not see clear evidence of CR in mice in vivo	Could not see clear evidence of CR in mice in vivo	Could not see clear evidence of CR in mice in vivo	Could not see clear evidence of CR in mice in vivo	Could not see clear evidence of CR in mice in vivo	Could not see clear evidence of CR in mice in vivo	Could not see clear evidence of CR in mice in vivo	Could not see clear evidence of CR in mice in vivo	Could not see clear evidence of CR in mice in vivo	Could not see clear evidence of CR in mice in vivo	Could not see clear evidence of CR in mice in vivo	Could not see clear evidence of CR in mice in vivo	Could not see clear evidence of CR in mice in vivo	Could not see clear evidence of CR in mice in vivo	Could not see clear evidence of CR in mice in vivo	Could not see clear evidence of CR in mice in vivo	Could not see clear evidence of CR in mice in vivo	Could not see clear evidence of CR in mice in vivo	Could not see clear evidence of CR in mice in vivo	Could not see clear evidence of CR in mice in vivo	Could not see clear evidence of CR in mice in vivo	Could not see clear evidence of CR in mice in vivo
444	Dietary restriction of rodents decreases aging rate without affecting initial mortality rate -- a meta-analysis.	/pubmed/23438200	create date:2013/02/27 | first author:Simons MJ	2013	Could not see clear evidence of CR in mice in vivo	Could not see clear evidence of CR in mice in vivo	Could not see clear evidence of CR in mice in vivo	Could not see clear evidence of CR in mice in vivo	Could not see clear evidence of CR in mice in vivo	Could not see clear evidence of CR in mice in vivo	Could not see clear evidence of CR in mice in vivo	Could not see clear evidence of CR in mice in vivo	Could not see clear evidence of CR in mice in vivo	Could not see clear evidence of CR in mice in vivo	Could not see clear evidence of CR in mice in vivo	Could not see clear evidence of CR in mice in vivo	Could not see clear evidence of CR in mice in vivo	Could not see clear evidence of CR in mice in vivo	Could not see clear evidence of CR in mice in vivo	Could not see clear evidence of CR in mice in vivo	Could not see clear evidence of CR in mice in vivo	Could not see clear evidence of CR in mice in vivo	Could not see clear evidence of CR in mice in vivo	Could not see clear evidence of CR in mice in vivo	Could not see clear evidence of CR in mice in vivo	Could not see clear evidence of CR in mice in vivo	Could not see clear evidence of CR in mice in vivo	Could not see clear evidence of CR in mice in vivo
450	FOXO3A directs a protective autophagy program in haematopoietic stem cells.	/pubmed/23389440	create date:2013/02/08 | first author:Warr MR	2013	Could not see clear evidence of CR in mice in vivo	Could not see clear evidence of CR in mice in vivo	Could not see clear evidence of CR in mice in vivo	Could not see clear evidence of CR in mice in vivo	Could not see clear evidence of CR in mice in vivo	Could not see clear evidence of CR in mice in vivo	Could not see clear evidence of CR in mice in vivo	Could not see clear evidence of CR in mice in vivo	Could not see clear evidence of CR in mice in vivo	Could not see clear evidence of CR in mice in vivo	Could not see clear evidence of CR in mice in vivo	Could not see clear evidence of CR in mice in vivo	Could not see clear evidence of CR in mice in vivo	Could not see clear evidence of CR in mice in vivo	Could not see clear evidence of CR in mice in vivo	Could not see clear evidence of CR in mice in vivo	Could not see clear evidence of CR in mice in vivo	Could not see clear evidence of CR in mice in vivo	Could not see clear evidence of CR in mice in vivo	Could not see clear evidence of CR in mice in vivo	Could not see clear evidence of CR in mice in vivo	Could not see clear evidence of CR in mice in vivo	Could not see clear evidence of CR in mice in vivo	Could not see clear evidence of CR in mice in vivo
452	Is fasting good for you?	/pubmed/23342442	create date:2013/01/25 | first author:Stipp D	2013	Could not see clear evidence of CR in mice in vivo	Could not see clear evidence of CR in mice in vivo	Could not see clear evidence of CR in mice in vivo	Could not see clear evidence of CR in mice in vivo	Could not see clear evidence of CR in mice in vivo	Could not see clear evidence of CR in mice in vivo	Could not see clear evidence of CR in mice in vivo	Could not see clear evidence of CR in mice in vivo	Could not see clear evidence of CR in mice in vivo	Could not see clear evidence of CR in mice in vivo	Could not see clear evidence of CR in mice in vivo	Could not see clear evidence of CR in mice in vivo	Could not see clear evidence of CR in mice in vivo	Could not see clear evidence of CR in mice in vivo	Could not see clear evidence of CR in mice in vivo	Could not see clear evidence of CR in mice in vivo	Could not see clear evidence of CR in mice in vivo	Could not see clear evidence of CR in mice in vivo	Could not see clear evidence of CR in mice in vivo	Could not see clear evidence of CR in mice in vivo	Could not see clear evidence of CR in mice in vivo	Could not see clear evidence of CR in mice in vivo	Could not see clear evidence of CR in mice in vivo	Could not see clear evidence of CR in mice in vivo
457	Preoperative diet impacts the adipose tissue response to surgical trauma.	/pubmed/23274098	create date:2013/01/01 | first author:Nguyen B	2013	Could not see clear evidence of CR in mice in vivo	Could not see clear evidence of CR in mice in vivo	Could not see clear evidence of CR in mice in vivo	Could not see clear evidence of CR in mice in vivo	Could not see clear evidence of CR in mice in vivo	Could not see clear evidence of CR in mice in vivo	Could not see clear evidence of CR in mice in vivo	Could not see clear evidence of CR in mice in vivo	Could not see clear evidence of CR in mice in vivo	Could not see clear evidence of CR in mice in vivo	Could not see clear evidence of CR in mice in vivo	Could not see clear evidence of CR in mice in vivo	Could not see clear evidence of CR in mice in vivo	Could not see clear evidence of CR in mice in vivo	Could not see clear evidence of CR in mice in vivo	Could not see clear evidence of CR in mice in vivo	Could not see clear evidence of CR in mice in vivo	Could not see clear evidence of CR in mice in vivo	Could not see clear evidence of CR in mice in vivo	Could not see clear evidence of CR in mice in vivo	Could not see clear evidence of CR in mice in vivo	Could not see clear evidence of CR in mice in vivo	Could not see clear evidence of CR in mice in vivo	Could not see clear evidence of CR in mice in vivo
459	Successful adaptation to ketosis by mice with tissue-specific deficiency of ketone body oxidation.	/pubmed/23233542	create date:2012/12/13 | first author:Cotter DG	2012	Could not see clear evidence of CR in mice in vivo	Could not see clear evidence of CR in mice in vivo	Could not see clear evidence of CR in mice in vivo	Could not see clear evidence of CR in mice in vivo	Could not see clear evidence of CR in mice in vivo	Could not see clear evidence of CR in mice in vivo	Could not see clear evidence of CR in mice in vivo	Could not see clear evidence of CR in mice in vivo	Could not see clear evidence of CR in mice in vivo	Could not see clear evidence of CR in mice in vivo	Could not see clear evidence of CR in mice in vivo	Could not see clear evidence of CR in mice in vivo	Could not see clear evidence of CR in mice in vivo	Could not see clear evidence of CR in mice in vivo	Could not see clear evidence of CR in mice in vivo	Could not see clear evidence of CR in mice in vivo	Could not see clear evidence of CR in mice in vivo	Could not see clear evidence of CR in mice in vivo	Could not see clear evidence of CR in mice in vivo	Could not see clear evidence of CR in mice in vivo	Could not see clear evidence of CR in mice in vivo	Could not see clear evidence of CR in mice in vivo	Could not see clear evidence of CR in mice in vivo	Could not see clear evidence of CR in mice in vivo
461	Interventions: Live long and prosper.	/pubmed/23222670	create date:2012/12/12 | first author:Bourzac K	2012	Could not see clear evidence of CR in mice in vivo	Could not see clear evidence of CR in mice in vivo	Could not see clear evidence of CR in mice in vivo	Could not see clear evidence of CR in mice in vivo	Could not see clear evidence of CR in mice in vivo	Could not see clear evidence of CR in mice in vivo	Could not see clear evidence of CR in mice in vivo	Could not see clear evidence of CR in mice in vivo	Could not see clear evidence of CR in mice in vivo	Could not see clear evidence of CR in mice in vivo	Could not see clear evidence of CR in mice in vivo	Could not see clear evidence of CR in mice in vivo	Could not see clear evidence of CR in mice in vivo	Could not see clear evidence of CR in mice in vivo	Could not see clear evidence of CR in mice in vivo	Could not see clear evidence of CR in mice in vivo	Could not see clear evidence of CR in mice in vivo	Could not see clear evidence of CR in mice in vivo	Could not see clear evidence of CR in mice in vivo	Could not see clear evidence of CR in mice in vivo	Could not see clear evidence of CR in mice in vivo	Could not see clear evidence of CR in mice in vivo	Could not see clear evidence of CR in mice in vivo	Could not see clear evidence of CR in mice in vivo
466	Thyroid hormone regulation of Sirtuin 1 expression and implications to integrated responses in fasted mice.	/pubmed/23151359	create date:2012/11/16 | first author:Cordeiro A	2012	Could not see clear evidence of CR in mice in vivo	Could not see clear evidence of CR in mice in vivo	Could not see clear evidence of CR in mice in vivo	Could not see clear evidence of CR in mice in vivo	Could not see clear evidence of CR in mice in vivo	Could not see clear evidence of CR in mice in vivo	Could not see clear evidence of CR in mice in vivo	Could not see clear evidence of CR in mice in vivo	Could not see clear evidence of CR in mice in vivo	Could not see clear evidence of CR in mice in vivo	Could not see clear evidence of CR in mice in vivo	Could not see clear evidence of CR in mice in vivo	Could not see clear evidence of CR in mice in vivo	Could not see clear evidence of CR in mice in vivo	Could not see clear evidence of CR in mice in vivo	Could not see clear evidence of CR in mice in vivo	Could not see clear evidence of CR in mice in vivo	Could not see clear evidence of CR in mice in vivo	Could not see clear evidence of CR in mice in vivo	Could not see clear evidence of CR in mice in vivo	Could not see clear evidence of CR in mice in vivo	Could not see clear evidence of CR in mice in vivo	Could not see clear evidence of CR in mice in vivo	Could not see clear evidence of CR in mice in vivo
468	Dietary resveratrol prevents Alzheimer's markers and increases life span in SAMP8.	/pubmed/23129026	create date:2012/11/07 | first author:Porquet D	2012	Could not see clear evidence of CR in mice in vivo	Could not see clear evidence of CR in mice in vivo	Could not see clear evidence of CR in mice in vivo	Could not see clear evidence of CR in mice in vivo	Could not see clear evidence of CR in mice in vivo	Could not see clear evidence of CR in mice in vivo	Could not see clear evidence of CR in mice in vivo	Could not see clear evidence of CR in mice in vivo	Could not see clear evidence of CR in mice in vivo	Could not see clear evidence of CR in mice in vivo	Could not see clear evidence of CR in mice in vivo	Could not see clear evidence of CR in mice in vivo	Could not see clear evidence of CR in mice in vivo	Could not see clear evidence of CR in mice in vivo	Could not see clear evidence of CR in mice in vivo	Could not see clear evidence of CR in mice in vivo	Could not see clear evidence of CR in mice in vivo	Could not see clear evidence of CR in mice in vivo	Could not see clear evidence of CR in mice in vivo	Could not see clear evidence of CR in mice in vivo	Could not see clear evidence of CR in mice in vivo	Could not see clear evidence of CR in mice in vivo	Could not see clear evidence of CR in mice in vivo	Could not see clear evidence of CR in mice in vivo
470	Models of longevity (calorie restriction and AC5 KO): result of three bad hypotheses.	/pubmed/23104867	create date:2012/10/30 | first author:Vatner SF	2012	Could not see clear evidence of CR in mice in vivo	Could not see clear evidence of CR in mice in vivo	Could not see clear evidence of CR in mice in vivo	Could not see clear evidence of CR in mice in vivo	Could not see clear evidence of CR in mice in vivo	Could not see clear evidence of CR in mice in vivo	Could not see clear evidence of CR in mice in vivo	Could not see clear evidence of CR in mice in vivo	Could not see clear evidence of CR in mice in vivo	Could not see clear evidence of CR in mice in vivo	Could not see clear evidence of CR in mice in vivo	Could not see clear evidence of CR in mice in vivo	Could not see clear evidence of CR in mice in vivo	Could not see clear evidence of CR in mice in vivo	Could not see clear evidence of CR in mice in vivo	Could not see clear evidence of CR in mice in vivo	Could not see clear evidence of CR in mice in vivo	Could not see clear evidence of CR in mice in vivo	Could not see clear evidence of CR in mice in vivo	Could not see clear evidence of CR in mice in vivo	Could not see clear evidence of CR in mice in vivo	Could not see clear evidence of CR in mice in vivo	Could not see clear evidence of CR in mice in vivo	Could not see clear evidence of CR in mice in vivo
476	Dietary restriction: critical co-factors to separate health span from life span benefits.	/pubmed/22963324	create date:2012/09/12 | first author:Mendelsohn AR	2012	Could not see clear evidence of CR in mice in vivo	Could not see clear evidence of CR in mice in vivo	Could not see clear evidence of CR in mice in vivo	Could not see clear evidence of CR in mice in vivo	Could not see clear evidence of CR in mice in vivo	Could not see clear evidence of CR in mice in vivo	Could not see clear evidence of CR in mice in vivo	Could not see clear evidence of CR in mice in vivo	Could not see clear evidence of CR in mice in vivo	Could not see clear evidence of CR in mice in vivo	Could not see clear evidence of CR in mice in vivo	Could not see clear evidence of CR in mice in vivo	Could not see clear evidence of CR in mice in vivo	Could not see clear evidence of CR in mice in vivo	Could not see clear evidence of CR in mice in vivo	Could not see clear evidence of CR in mice in vivo	Could not see clear evidence of CR in mice in vivo	Could not see clear evidence of CR in mice in vivo	Could not see clear evidence of CR in mice in vivo	Could not see clear evidence of CR in mice in vivo	Could not see clear evidence of CR in mice in vivo	Could not see clear evidence of CR in mice in vivo	Could not see clear evidence of CR in mice in vivo	Could not see clear evidence of CR in mice in vivo
480	Stem cell niches: famished Paneth cells, gluttonous stem cells.	/pubmed/22835795	create date:2012/07/28 | first author:Kim TH	2012	Could not see clear evidence of CR in mice in vivo	Could not see clear evidence of CR in mice in vivo	Could not see clear evidence of CR in mice in vivo	Could not see clear evidence of CR in mice in vivo	Could not see clear evidence of CR in mice in vivo	Could not see clear evidence of CR in mice in vivo	Could not see clear evidence of CR in mice in vivo	Could not see clear evidence of CR in mice in vivo	Could not see clear evidence of CR in mice in vivo	Could not see clear evidence of CR in mice in vivo	Could not see clear evidence of CR in mice in vivo	Could not see clear evidence of CR in mice in vivo	Could not see clear evidence of CR in mice in vivo	Could not see clear evidence of CR in mice in vivo	Could not see clear evidence of CR in mice in vivo	Could not see clear evidence of CR in mice in vivo	Could not see clear evidence of CR in mice in vivo	Could not see clear evidence of CR in mice in vivo	Could not see clear evidence of CR in mice in vivo	Could not see clear evidence of CR in mice in vivo	Could not see clear evidence of CR in mice in vivo	Could not see clear evidence of CR in mice in vivo	Could not see clear evidence of CR in mice in vivo	Could not see clear evidence of CR in mice in vivo
481	Conjectures on some curious connections among social status, calorie restriction, hunger, fatness, and longevity.	/pubmed/22834696	create date:2012/07/28 | first author:Kaiser KA	2012	Could not see clear evidence of CR in mice in vivo	Could not see clear evidence of CR in mice in vivo	Could not see clear evidence of CR in mice in vivo	Could not see clear evidence of CR in mice in vivo	Could not see clear evidence of CR in mice in vivo	Could not see clear evidence of CR in mice in vivo	Could not see clear evidence of CR in mice in vivo	Could not see clear evidence of CR in mice in vivo	Could not see clear evidence of CR in mice in vivo	Could not see clear evidence of CR in mice in vivo	Could not see clear evidence of CR in mice in vivo	Could not see clear evidence of CR in mice in vivo	Could not see clear evidence of CR in mice in vivo	Could not see clear evidence of CR in mice in vivo	Could not see clear evidence of CR in mice in vivo	Could not see clear evidence of CR in mice in vivo	Could not see clear evidence of CR in mice in vivo	Could not see clear evidence of CR in mice in vivo	Could not see clear evidence of CR in mice in vivo	Could not see clear evidence of CR in mice in vivo	Could not see clear evidence of CR in mice in vivo	Could not see clear evidence of CR in mice in vivo	Could not see clear evidence of CR in mice in vivo	Could not see clear evidence of CR in mice in vivo
490	Transcript profiling of the ruminant liver indicates a unique program of transcriptional regulation of ketogenic enzymes during food restriction.	/pubmed/22748507	create date:2012/07/04 | first author:Doelman J	2012	Could not see clear evidence of CR in mice in vivo	Could not see clear evidence of CR in mice in vivo	Could not see clear evidence of CR in mice in vivo	Could not see clear evidence of CR in mice in vivo	Could not see clear evidence of CR in mice in vivo	Could not see clear evidence of CR in mice in vivo	Could not see clear evidence of CR in mice in vivo	Could not see clear evidence of CR in mice in vivo	Could not see clear evidence of CR in mice in vivo	Could not see clear evidence of CR in mice in vivo	Could not see clear evidence of CR in mice in vivo	Could not see clear evidence of CR in mice in vivo	Could not see clear evidence of CR in mice in vivo	Could not see clear evidence of CR in mice in vivo	Could not see clear evidence of CR in mice in vivo	Could not see clear evidence of CR in mice in vivo	Could not see clear evidence of CR in mice in vivo	Could not see clear evidence of CR in mice in vivo	Could not see clear evidence of CR in mice in vivo	Could not see clear evidence of CR in mice in vivo	Could not see clear evidence of CR in mice in vivo	Could not see clear evidence of CR in mice in vivo	Could not see clear evidence of CR in mice in vivo	Could not see clear evidence of CR in mice in vivo
492	The effect of resveratrol on longevity across species: a meta-analysis.	/pubmed/22718956	create date:2012/06/22 | first author:Hector KL	2012	Could not see clear evidence of CR in mice in vivo	Could not see clear evidence of CR in mice in vivo	Could not see clear evidence of CR in mice in vivo	Could not see clear evidence of CR in mice in vivo	Could not see clear evidence of CR in mice in vivo	Could not see clear evidence of CR in mice in vivo	Could not see clear evidence of CR in mice in vivo	Could not see clear evidence of CR in mice in vivo	Could not see clear evidence of CR in mice in vivo	Could not see clear evidence of CR in mice in vivo	Could not see clear evidence of CR in mice in vivo	Could not see clear evidence of CR in mice in vivo	Could not see clear evidence of CR in mice in vivo	Could not see clear evidence of CR in mice in vivo	Could not see clear evidence of CR in mice in vivo	Could not see clear evidence of CR in mice in vivo	Could not see clear evidence of CR in mice in vivo	Could not see clear evidence of CR in mice in vivo	Could not see clear evidence of CR in mice in vivo	Could not see clear evidence of CR in mice in vivo	Could not see clear evidence of CR in mice in vivo	Could not see clear evidence of CR in mice in vivo	Could not see clear evidence of CR in mice in vivo	Could not see clear evidence of CR in mice in vivo
495	Dietary methyl donor depletion protects against intestinal tumorigenesis in Apc(Min/+) mice.	/pubmed/22677908	create date:2012/06/09 | first author:Kadaveru K	2012	Could not see clear evidence of CR in mice in vivo	Could not see clear evidence of CR in mice in vivo	Could not see clear evidence of CR in mice in vivo	Could not see clear evidence of CR in mice in vivo	Could not see clear evidence of CR in mice in vivo	Could not see clear evidence of CR in mice in vivo	Could not see clear evidence of CR in mice in vivo	Could not see clear evidence of CR in mice in vivo	Could not see clear evidence of CR in mice in vivo	Could not see clear evidence of CR in mice in vivo	Could not see clear evidence of CR in mice in vivo	Could not see clear evidence of CR in mice in vivo	Could not see clear evidence of CR in mice in vivo	Could not see clear evidence of CR in mice in vivo	Could not see clear evidence of CR in mice in vivo	Could not see clear evidence of CR in mice in vivo	Could not see clear evidence of CR in mice in vivo	Could not see clear evidence of CR in mice in vivo	Could not see clear evidence of CR in mice in vivo	Could not see clear evidence of CR in mice in vivo	Could not see clear evidence of CR in mice in vivo	Could not see clear evidence of CR in mice in vivo	Could not see clear evidence of CR in mice in vivo	Could not see clear evidence of CR in mice in vivo
509	SIRT3 protein deacetylates isocitrate dehydrogenase 2 (IDH2) and regulates mitochondrial redox status.	/pubmed/22416140	create date:2012/03/15 | first author:Yu W	2012	Could not see clear evidence of CR in mice in vivo	Could not see clear evidence of CR in mice in vivo	Could not see clear evidence of CR in mice in vivo	Could not see clear evidence of CR in mice in vivo	Could not see clear evidence of CR in mice in vivo	Could not see clear evidence of CR in mice in vivo	Could not see clear evidence of CR in mice in vivo	Could not see clear evidence of CR in mice in vivo	Could not see clear evidence of CR in mice in vivo	Could not see clear evidence of CR in mice in vivo	Could not see clear evidence of CR in mice in vivo	Could not see clear evidence of CR in mice in vivo	Could not see clear evidence of CR in mice in vivo	Could not see clear evidence of CR in mice in vivo	Could not see clear evidence of CR in mice in vivo	Could not see clear evidence of CR in mice in vivo	Could not see clear evidence of CR in mice in vivo	Could not see clear evidence of CR in mice in vivo	Could not see clear evidence of CR in mice in vivo	Could not see clear evidence of CR in mice in vivo	Could not see clear evidence of CR in mice in vivo	Could not see clear evidence of CR in mice in vivo	Could not see clear evidence of CR in mice in vivo	Could not see clear evidence of CR in mice in vivo
516	Melanocortin-3 receptors are involved in adaptation to restricted feeding.	/pubmed/22353545	create date:2012/02/23 | first author:Begriche K	2012	Could not see clear evidence of CR in mice in vivo	Could not see clear evidence of CR in mice in vivo	Could not see clear evidence of CR in mice in vivo	Could not see clear evidence of CR in mice in vivo	Could not see clear evidence of CR in mice in vivo	Could not see clear evidence of CR in mice in vivo	Could not see clear evidence of CR in mice in vivo	Could not see clear evidence of CR in mice in vivo	Could not see clear evidence of CR in mice in vivo	Could not see clear evidence of CR in mice in vivo	Could not see clear evidence of CR in mice in vivo	Could not see clear evidence of CR in mice in vivo	Could not see clear evidence of CR in mice in vivo	Could not see clear evidence of CR in mice in vivo	Could not see clear evidence of CR in mice in vivo	Could not see clear evidence of CR in mice in vivo	Could not see clear evidence of CR in mice in vivo	Could not see clear evidence of CR in mice in vivo	Could not see clear evidence of CR in mice in vivo	Could not see clear evidence of CR in mice in vivo	Could not see clear evidence of CR in mice in vivo	Could not see clear evidence of CR in mice in vivo	Could not see clear evidence of CR in mice in vivo	Could not see clear evidence of CR in mice in vivo
519	Resveratrol ameliorates aging-related metabolic phenotypes by inhibiting cAMP phosphodiesterases.	/pubmed/22304913	create date:2012/02/07 | first author:Park SJ	2012	Could not see clear evidence of CR in mice in vivo	Could not see clear evidence of CR in mice in vivo	Could not see clear evidence of CR in mice in vivo	Could not see clear evidence of CR in mice in vivo	Could not see clear evidence of CR in mice in vivo	Could not see clear evidence of CR in mice in vivo	Could not see clear evidence of CR in mice in vivo	Could not see clear evidence of CR in mice in vivo	Could not see clear evidence of CR in mice in vivo	Could not see clear evidence of CR in mice in vivo	Could not see clear evidence of CR in mice in vivo	Could not see clear evidence of CR in mice in vivo	Could not see clear evidence of CR in mice in vivo	Could not see clear evidence of CR in mice in vivo	Could not see clear evidence of CR in mice in vivo	Could not see clear evidence of CR in mice in vivo	Could not see clear evidence of CR in mice in vivo	Could not see clear evidence of CR in mice in vivo	Could not see clear evidence of CR in mice in vivo	Could not see clear evidence of CR in mice in vivo	Could not see clear evidence of CR in mice in vivo	Could not see clear evidence of CR in mice in vivo	Could not see clear evidence of CR in mice in vivo	Could not see clear evidence of CR in mice in vivo
524	Potentiation of dietary restriction-induced lifespan extension by polyphenols.	/pubmed/22265987	create date:2012/01/24 | first author:Aires DJ	2012	Could not see clear evidence of CR in mice in vivo	Could not see clear evidence of CR in mice in vivo	Could not see clear evidence of CR in mice in vivo	Could not see clear evidence of CR in mice in vivo	Could not see clear evidence of CR in mice in vivo	Could not see clear evidence of CR in mice in vivo	Could not see clear evidence of CR in mice in vivo	Could not see clear evidence of CR in mice in vivo	Could not see clear evidence of CR in mice in vivo	Could not see clear evidence of CR in mice in vivo	Could not see clear evidence of CR in mice in vivo	Could not see clear evidence of CR in mice in vivo	Could not see clear evidence of CR in mice in vivo	Could not see clear evidence of CR in mice in vivo	Could not see clear evidence of CR in mice in vivo	Could not see clear evidence of CR in mice in vivo	Could not see clear evidence of CR in mice in vivo	Could not see clear evidence of CR in mice in vivo	Could not see clear evidence of CR in mice in vivo	Could not see clear evidence of CR in mice in vivo	Could not see clear evidence of CR in mice in vivo	Could not see clear evidence of CR in mice in vivo	Could not see clear evidence of CR in mice in vivo	Could not see clear evidence of CR in mice in vivo
530	Should diabetic women with breast cancer have their own intervention studies?	/pubmed/22180498	create date:2011/12/20 | first author:Potter DA	2011	Could not see clear evidence of CR in mice in vivo	Could not see clear evidence of CR in mice in vivo	Could not see clear evidence of CR in mice in vivo	Could not see clear evidence of CR in mice in vivo	Could not see clear evidence of CR in mice in vivo	Could not see clear evidence of CR in mice in vivo	Could not see clear evidence of CR in mice in vivo	Could not see clear evidence of CR in mice in vivo	Could not see clear evidence of CR in mice in vivo	Could not see clear evidence of CR in mice in vivo	Could not see clear evidence of CR in mice in vivo	Could not see clear evidence of CR in mice in vivo	Could not see clear evidence of CR in mice in vivo	Could not see clear evidence of CR in mice in vivo	Could not see clear evidence of CR in mice in vivo	Could not see clear evidence of CR in mice in vivo	Could not see clear evidence of CR in mice in vivo	Could not see clear evidence of CR in mice in vivo	Could not see clear evidence of CR in mice in vivo	Could not see clear evidence of CR in mice in vivo	Could not see clear evidence of CR in mice in vivo	Could not see clear evidence of CR in mice in vivo	Could not see clear evidence of CR in mice in vivo	Could not see clear evidence of CR in mice in vivo
534	Energy-sensing factors coactivator peroxisome proliferator-activated receptor γ coactivator 1-α (PGC-1α) and AMP-activated protein kinase control expression of inflammatory mediators in liver: induction of interleukin 1 receptor antagonist.	/pubmed/22117073	create date:2011/11/26 | first author:Buler M	2011	Could not see clear evidence of CR in mice in vivo	Could not see clear evidence of CR in mice in vivo	Could not see clear evidence of CR in mice in vivo	Could not see clear evidence of CR in mice in vivo	Could not see clear evidence of CR in mice in vivo	Could not see clear evidence of CR in mice in vivo	Could not see clear evidence of CR in mice in vivo	Could not see clear evidence of CR in mice in vivo	Could not see clear evidence of CR in mice in vivo	Could not see clear evidence of CR in mice in vivo	Could not see clear evidence of CR in mice in vivo	Could not see clear evidence of CR in mice in vivo	Could not see clear evidence of CR in mice in vivo	Could not see clear evidence of CR in mice in vivo	Could not see clear evidence of CR in mice in vivo	Could not see clear evidence of CR in mice in vivo	Could not see clear evidence of CR in mice in vivo	Could not see clear evidence of CR in mice in vivo	Could not see clear evidence of CR in mice in vivo	Could not see clear evidence of CR in mice in vivo	Could not see clear evidence of CR in mice in vivo	Could not see clear evidence of CR in mice in vivo	Could not see clear evidence of CR in mice in vivo	Could not see clear evidence of CR in mice in vivo
549	The spatial association of gene expression evolves from synchrony to asynchrony and stochasticity with age.	/pubmed/21912663	create date:2011/09/14 | first author:Wang Q	2011	Could not see clear evidence of CR in mice in vivo	Could not see clear evidence of CR in mice in vivo	Could not see clear evidence of CR in mice in vivo	Could not see clear evidence of CR in mice in vivo	Could not see clear evidence of CR in mice in vivo	Could not see clear evidence of CR in mice in vivo	Could not see clear evidence of CR in mice in vivo	Could not see clear evidence of CR in mice in vivo	Could not see clear evidence of CR in mice in vivo	Could not see clear evidence of CR in mice in vivo	Could not see clear evidence of CR in mice in vivo	Could not see clear evidence of CR in mice in vivo	Could not see clear evidence of CR in mice in vivo	Could not see clear evidence of CR in mice in vivo	Could not see clear evidence of CR in mice in vivo	Could not see clear evidence of CR in mice in vivo	Could not see clear evidence of CR in mice in vivo	Could not see clear evidence of CR in mice in vivo	Could not see clear evidence of CR in mice in vivo	Could not see clear evidence of CR in mice in vivo	Could not see clear evidence of CR in mice in vivo	Could not see clear evidence of CR in mice in vivo	Could not see clear evidence of CR in mice in vivo	Could not see clear evidence of CR in mice in vivo
550	The outcome of acute schistosomiasis infection in adult mice with postnatal exposure to maternal malnutrition.	/pubmed/21894380	create date:2011/09/07 | first author:Corrêa CL	2011	Could not see clear evidence of CR in mice in vivo	Could not see clear evidence of CR in mice in vivo	Could not see clear evidence of CR in mice in vivo	Could not see clear evidence of CR in mice in vivo	Could not see clear evidence of CR in mice in vivo	Could not see clear evidence of CR in mice in vivo	Could not see clear evidence of CR in mice in vivo	Could not see clear evidence of CR in mice in vivo	Could not see clear evidence of CR in mice in vivo	Could not see clear evidence of CR in mice in vivo	Could not see clear evidence of CR in mice in vivo	Could not see clear evidence of CR in mice in vivo	Could not see clear evidence of CR in mice in vivo	Could not see clear evidence of CR in mice in vivo	Could not see clear evidence of CR in mice in vivo	Could not see clear evidence of CR in mice in vivo	Could not see clear evidence of CR in mice in vivo	Could not see clear evidence of CR in mice in vivo	Could not see clear evidence of CR in mice in vivo	Could not see clear evidence of CR in mice in vivo	Could not see clear evidence of CR in mice in vivo	Could not see clear evidence of CR in mice in vivo	Could not see clear evidence of CR in mice in vivo	Could not see clear evidence of CR in mice in vivo
555	Deletion of the mammalian INDY homolog mimics aspects of dietary restriction and protects against adiposity and insulin resistance in mice.	/pubmed/21803289	create date:2011/08/02 | first author:Birkenfeld AL	2011	Could not see clear evidence of CR in mice in vivo	Could not see clear evidence of CR in mice in vivo	Could not see clear evidence of CR in mice in vivo	Could not see clear evidence of CR in mice in vivo	Could not see clear evidence of CR in mice in vivo	Could not see clear evidence of CR in mice in vivo	Could not see clear evidence of CR in mice in vivo	Could not see clear evidence of CR in mice in vivo	Could not see clear evidence of CR in mice in vivo	Could not see clear evidence of CR in mice in vivo	Could not see clear evidence of CR in mice in vivo	Could not see clear evidence of CR in mice in vivo	Could not see clear evidence of CR in mice in vivo	Could not see clear evidence of CR in mice in vivo	Could not see clear evidence of CR in mice in vivo	Could not see clear evidence of CR in mice in vivo	Could not see clear evidence of CR in mice in vivo	Could not see clear evidence of CR in mice in vivo	Could not see clear evidence of CR in mice in vivo	Could not see clear evidence of CR in mice in vivo	Could not see clear evidence of CR in mice in vivo	Could not see clear evidence of CR in mice in vivo	Could not see clear evidence of CR in mice in vivo	Could not see clear evidence of CR in mice in vivo
558	New comparative genomics approach reveals a conserved health span signature across species.	/pubmed/21775776	create date:2011/07/22 | first author:Antosh M	2011	Could not see clear evidence of CR in mice in vivo	Could not see clear evidence of CR in mice in vivo	Could not see clear evidence of CR in mice in vivo	Could not see clear evidence of CR in mice in vivo	Could not see clear evidence of CR in mice in vivo	Could not see clear evidence of CR in mice in vivo	Could not see clear evidence of CR in mice in vivo	Could not see clear evidence of CR in mice in vivo	Could not see clear evidence of CR in mice in vivo	Could not see clear evidence of CR in mice in vivo	Could not see clear evidence of CR in mice in vivo	Could not see clear evidence of CR in mice in vivo	Could not see clear evidence of CR in mice in vivo	Could not see clear evidence of CR in mice in vivo	Could not see clear evidence of CR in mice in vivo	Could not see clear evidence of CR in mice in vivo	Could not see clear evidence of CR in mice in vivo	Could not see clear evidence of CR in mice in vivo	Could not see clear evidence of CR in mice in vivo	Could not see clear evidence of CR in mice in vivo	Could not see clear evidence of CR in mice in vivo	Could not see clear evidence of CR in mice in vivo	Could not see clear evidence of CR in mice in vivo	Could not see clear evidence of CR in mice in vivo
568	SIRT3 attenuates palmitate-induced ROS production and inflammation in proximal tubular cells.	/pubmed/21664458	create date:2011/06/15 | first author:Koyama T	2011	Could not see clear evidence of CR in mice in vivo	Could not see clear evidence of CR in mice in vivo	Could not see clear evidence of CR in mice in vivo	Could not see clear evidence of CR in mice in vivo	Could not see clear evidence of CR in mice in vivo	Could not see clear evidence of CR in mice in vivo	Could not see clear evidence of CR in mice in vivo	Could not see clear evidence of CR in mice in vivo	Could not see clear evidence of CR in mice in vivo	Could not see clear evidence of CR in mice in vivo	Could not see clear evidence of CR in mice in vivo	Could not see clear evidence of CR in mice in vivo	Could not see clear evidence of CR in mice in vivo	Could not see clear evidence of CR in mice in vivo	Could not see clear evidence of CR in mice in vivo	Could not see clear evidence of CR in mice in vivo	Could not see clear evidence of CR in mice in vivo	Could not see clear evidence of CR in mice in vivo	Could not see clear evidence of CR in mice in vivo	Could not see clear evidence of CR in mice in vivo	Could not see clear evidence of CR in mice in vivo	Could not see clear evidence of CR in mice in vivo	Could not see clear evidence of CR in mice in vivo	Could not see clear evidence of CR in mice in vivo
569	Energy restriction negates NMDA receptor antagonist efficacy in ischemic stroke.	/pubmed/21660587	create date:2011/06/11 | first author:Yoon JS	2011	Could not see clear evidence of CR in mice in vivo	Could not see clear evidence of CR in mice in vivo	Could not see clear evidence of CR in mice in vivo	Could not see clear evidence of CR in mice in vivo	Could not see clear evidence of CR in mice in vivo	Could not see clear evidence of CR in mice in vivo	Could not see clear evidence of CR in mice in vivo	Could not see clear evidence of CR in mice in vivo	Could not see clear evidence of CR in mice in vivo	Could not see clear evidence of CR in mice in vivo	Could not see clear evidence of CR in mice in vivo	Could not see clear evidence of CR in mice in vivo	Could not see clear evidence of CR in mice in vivo	Could not see clear evidence of CR in mice in vivo	Could not see clear evidence of CR in mice in vivo	Could not see clear evidence of CR in mice in vivo	Could not see clear evidence of CR in mice in vivo	Could not see clear evidence of CR in mice in vivo	Could not see clear evidence of CR in mice in vivo	Could not see clear evidence of CR in mice in vivo	Could not see clear evidence of CR in mice in vivo	Could not see clear evidence of CR in mice in vivo	Could not see clear evidence of CR in mice in vivo	Could not see clear evidence of CR in mice in vivo
573	Voluntary exercise improves high-fat diet-induced leptin resistance independent of adiposity.	/pubmed/21586558	create date:2011/05/19 | first author:Krawczewski Carhuatanta KA	2011	Could not see clear evidence of CR in mice in vivo	Could not see clear evidence of CR in mice in vivo	Could not see clear evidence of CR in mice in vivo	Could not see clear evidence of CR in mice in vivo	Could not see clear evidence of CR in mice in vivo	Could not see clear evidence of CR in mice in vivo	Could not see clear evidence of CR in mice in vivo	Could not see clear evidence of CR in mice in vivo	Could not see clear evidence of CR in mice in vivo	Could not see clear evidence of CR in mice in vivo	Could not see clear evidence of CR in mice in vivo	Could not see clear evidence of CR in mice in vivo	Could not see clear evidence of CR in mice in vivo	Could not see clear evidence of CR in mice in vivo	Could not see clear evidence of CR in mice in vivo	Could not see clear evidence of CR in mice in vivo	Could not see clear evidence of CR in mice in vivo	Could not see clear evidence of CR in mice in vivo	Could not see clear evidence of CR in mice in vivo	Could not see clear evidence of CR in mice in vivo	Could not see clear evidence of CR in mice in vivo	Could not see clear evidence of CR in mice in vivo	Could not see clear evidence of CR in mice in vivo	Could not see clear evidence of CR in mice in vivo
575	Fetal programming of pulmonary vascular dysfunction in mice: role of epigenetic mechanisms.	/pubmed/21536851	create date:2011/05/04 | first author:Rexhaj E	2011	Could not see clear evidence of CR in mice in vivo	Could not see clear evidence of CR in mice in vivo	Could not see clear evidence of CR in mice in vivo	Could not see clear evidence of CR in mice in vivo	Could not see clear evidence of CR in mice in vivo	Could not see clear evidence of CR in mice in vivo	Could not see clear evidence of CR in mice in vivo	Could not see clear evidence of CR in mice in vivo	Could not see clear evidence of CR in mice in vivo	Could not see clear evidence of CR in mice in vivo	Could not see clear evidence of CR in mice in vivo	Could not see clear evidence of CR in mice in vivo	Could not see clear evidence of CR in mice in vivo	Could not see clear evidence of CR in mice in vivo	Could not see clear evidence of CR in mice in vivo	Could not see clear evidence of CR in mice in vivo	Could not see clear evidence of CR in mice in vivo	Could not see clear evidence of CR in mice in vivo	Could not see clear evidence of CR in mice in vivo	Could not see clear evidence of CR in mice in vivo	Could not see clear evidence of CR in mice in vivo	Could not see clear evidence of CR in mice in vivo	Could not see clear evidence of CR in mice in vivo	Could not see clear evidence of CR in mice in vivo
581	Stabilization of Suv39H1 by SirT1 is part of oxidative stress response and ensures genome protection.	/pubmed/21504832	create date:2011/04/21 | first author:Bosch-Presegué L	2011	Could not see clear evidence of CR in mice in vivo	Could not see clear evidence of CR in mice in vivo	Could not see clear evidence of CR in mice in vivo	Could not see clear evidence of CR in mice in vivo	Could not see clear evidence of CR in mice in vivo	Could not see clear evidence of CR in mice in vivo	Could not see clear evidence of CR in mice in vivo	Could not see clear evidence of CR in mice in vivo	Could not see clear evidence of CR in mice in vivo	Could not see clear evidence of CR in mice in vivo	Could not see clear evidence of CR in mice in vivo	Could not see clear evidence of CR in mice in vivo	Could not see clear evidence of CR in mice in vivo	Could not see clear evidence of CR in mice in vivo	Could not see clear evidence of CR in mice in vivo	Could not see clear evidence of CR in mice in vivo	Could not see clear evidence of CR in mice in vivo	Could not see clear evidence of CR in mice in vivo	Could not see clear evidence of CR in mice in vivo	Could not see clear evidence of CR in mice in vivo	Could not see clear evidence of CR in mice in vivo	Could not see clear evidence of CR in mice in vivo	Could not see clear evidence of CR in mice in vivo	Could not see clear evidence of CR in mice in vivo
582	All-trans retinoic acid modifies the expression of clock and disease marker genes.	/pubmed/21497500	create date:2011/04/19 | first author:Sherman H	2011	Could not see clear evidence of CR in mice in vivo	Could not see clear evidence of CR in mice in vivo	Could not see clear evidence of CR in mice in vivo	Could not see clear evidence of CR in mice in vivo	Could not see clear evidence of CR in mice in vivo	Could not see clear evidence of CR in mice in vivo	Could not see clear evidence of CR in mice in vivo	Could not see clear evidence of CR in mice in vivo	Could not see clear evidence of CR in mice in vivo	Could not see clear evidence of CR in mice in vivo	Could not see clear evidence of CR in mice in vivo	Could not see clear evidence of CR in mice in vivo	Could not see clear evidence of CR in mice in vivo	Could not see clear evidence of CR in mice in vivo	Could not see clear evidence of CR in mice in vivo	Could not see clear evidence of CR in mice in vivo	Could not see clear evidence of CR in mice in vivo	Could not see clear evidence of CR in mice in vivo	Could not see clear evidence of CR in mice in vivo	Could not see clear evidence of CR in mice in vivo	Could not see clear evidence of CR in mice in vivo	Could not see clear evidence of CR in mice in vivo	Could not see clear evidence of CR in mice in vivo	Could not see clear evidence of CR in mice in vivo
584	Beneficial effects of alternate dietary regimen on liver inflammation, atherosclerosis and renal activation.	/pubmed/21483792	create date:2011/04/13 | first author:Wielinga PY	2011	Could not see clear evidence of CR in mice in vivo	Could not see clear evidence of CR in mice in vivo	Could not see clear evidence of CR in mice in vivo	Could not see clear evidence of CR in mice in vivo	Could not see clear evidence of CR in mice in vivo	Could not see clear evidence of CR in mice in vivo	Could not see clear evidence of CR in mice in vivo	Could not see clear evidence of CR in mice in vivo	Could not see clear evidence of CR in mice in vivo	Could not see clear evidence of CR in mice in vivo	Could not see clear evidence of CR in mice in vivo	Could not see clear evidence of CR in mice in vivo	Could not see clear evidence of CR in mice in vivo	Could not see clear evidence of CR in mice in vivo	Could not see clear evidence of CR in mice in vivo	Could not see clear evidence of CR in mice in vivo	Could not see clear evidence of CR in mice in vivo	Could not see clear evidence of CR in mice in vivo	Could not see clear evidence of CR in mice in vivo	Could not see clear evidence of CR in mice in vivo	Could not see clear evidence of CR in mice in vivo	Could not see clear evidence of CR in mice in vivo	Could not see clear evidence of CR in mice in vivo	Could not see clear evidence of CR in mice in vivo
591	Deletion of growth hormone receptor gene but not visceral fat removal decreases expression of apoptosis-related genes in the kidney-potential mechanism of lifespan extension.	/pubmed/21431351	create date:2011/03/25 | first author:Gesing A	2011	Could not see clear evidence of CR in mice in vivo	Could not see clear evidence of CR in mice in vivo	Could not see clear evidence of CR in mice in vivo	Could not see clear evidence of CR in mice in vivo	Could not see clear evidence of CR in mice in vivo	Could not see clear evidence of CR in mice in vivo	Could not see clear evidence of CR in mice in vivo	Could not see clear evidence of CR in mice in vivo	Could not see clear evidence of CR in mice in vivo	Could not see clear evidence of CR in mice in vivo	Could not see clear evidence of CR in mice in vivo	Could not see clear evidence of CR in mice in vivo	Could not see clear evidence of CR in mice in vivo	Could not see clear evidence of CR in mice in vivo	Could not see clear evidence of CR in mice in vivo	Could not see clear evidence of CR in mice in vivo	Could not see clear evidence of CR in mice in vivo	Could not see clear evidence of CR in mice in vivo	Could not see clear evidence of CR in mice in vivo	Could not see clear evidence of CR in mice in vivo	Could not see clear evidence of CR in mice in vivo	Could not see clear evidence of CR in mice in vivo	Could not see clear evidence of CR in mice in vivo	Could not see clear evidence of CR in mice in vivo
596	Intermittent fasting in mice does not improve hindlimb motor performance after spinal cord injury.	/pubmed/21410319	create date:2011/03/18 | first author:Streijger F	2011	Could not see clear evidence of CR in mice in vivo	Could not see clear evidence of CR in mice in vivo	Could not see clear evidence of CR in mice in vivo	Could not see clear evidence of CR in mice in vivo	Could not see clear evidence of CR in mice in vivo	Could not see clear evidence of CR in mice in vivo	Could not see clear evidence of CR in mice in vivo	Could not see clear evidence of CR in mice in vivo	Could not see clear evidence of CR in mice in vivo	Could not see clear evidence of CR in mice in vivo	Could not see clear evidence of CR in mice in vivo	Could not see clear evidence of CR in mice in vivo	Could not see clear evidence of CR in mice in vivo	Could not see clear evidence of CR in mice in vivo	Could not see clear evidence of CR in mice in vivo	Could not see clear evidence of CR in mice in vivo	Could not see clear evidence of CR in mice in vivo	Could not see clear evidence of CR in mice in vivo	Could not see clear evidence of CR in mice in vivo	Could not see clear evidence of CR in mice in vivo	Could not see clear evidence of CR in mice in vivo	Could not see clear evidence of CR in mice in vivo	Could not see clear evidence of CR in mice in vivo	Could not see clear evidence of CR in mice in vivo
598	Reduced mitochondrial function in obesity-associated fatty liver: SIRT3 takes on the fat.	/pubmed/21386135	create date:2011/03/10 | first author:Choudhury M	2011	Could not see clear evidence of CR in mice in vivo	Could not see clear evidence of CR in mice in vivo	Could not see clear evidence of CR in mice in vivo	Could not see clear evidence of CR in mice in vivo	Could not see clear evidence of CR in mice in vivo	Could not see clear evidence of CR in mice in vivo	Could not see clear evidence of CR in mice in vivo	Could not see clear evidence of CR in mice in vivo	Could not see clear evidence of CR in mice in vivo	Could not see clear evidence of CR in mice in vivo	Could not see clear evidence of CR in mice in vivo	Could not see clear evidence of CR in mice in vivo	Could not see clear evidence of CR in mice in vivo	Could not see clear evidence of CR in mice in vivo	Could not see clear evidence of CR in mice in vivo	Could not see clear evidence of CR in mice in vivo	Could not see clear evidence of CR in mice in vivo	Could not see clear evidence of CR in mice in vivo	Could not see clear evidence of CR in mice in vivo	Could not see clear evidence of CR in mice in vivo	Could not see clear evidence of CR in mice in vivo	Could not see clear evidence of CR in mice in vivo	Could not see clear evidence of CR in mice in vivo	Could not see clear evidence of CR in mice in vivo
600	Caffeine alters circadian rhythms and expression of disease and metabolic markers.	/pubmed/21352949	create date:2011/03/01 | first author:Sherman H	2011	Could not see clear evidence of CR in mice in vivo	Could not see clear evidence of CR in mice in vivo	Could not see clear evidence of CR in mice in vivo	Could not see clear evidence of CR in mice in vivo	Could not see clear evidence of CR in mice in vivo	Could not see clear evidence of CR in mice in vivo	Could not see clear evidence of CR in mice in vivo	Could not see clear evidence of CR in mice in vivo	Could not see clear evidence of CR in mice in vivo	Could not see clear evidence of CR in mice in vivo	Could not see clear evidence of CR in mice in vivo	Could not see clear evidence of CR in mice in vivo	Could not see clear evidence of CR in mice in vivo	Could not see clear evidence of CR in mice in vivo	Could not see clear evidence of CR in mice in vivo	Could not see clear evidence of CR in mice in vivo	Could not see clear evidence of CR in mice in vivo	Could not see clear evidence of CR in mice in vivo	Could not see clear evidence of CR in mice in vivo	Could not see clear evidence of CR in mice in vivo	Could not see clear evidence of CR in mice in vivo	Could not see clear evidence of CR in mice in vivo	Could not see clear evidence of CR in mice in vivo	Could not see clear evidence of CR in mice in vivo
601	Neuronal suppressor of cytokine signaling-3 deficiency enhances hypothalamic leptin-dependent phosphatidylinositol 3-kinase signaling.	/pubmed/21325649	create date:2011/02/18 | first author:Metlakunta AS	2011	Could not see clear evidence of CR in mice in vivo	Could not see clear evidence of CR in mice in vivo	Could not see clear evidence of CR in mice in vivo	Could not see clear evidence of CR in mice in vivo	Could not see clear evidence of CR in mice in vivo	Could not see clear evidence of CR in mice in vivo	Could not see clear evidence of CR in mice in vivo	Could not see clear evidence of CR in mice in vivo	Could not see clear evidence of CR in mice in vivo	Could not see clear evidence of CR in mice in vivo	Could not see clear evidence of CR in mice in vivo	Could not see clear evidence of CR in mice in vivo	Could not see clear evidence of CR in mice in vivo	Could not see clear evidence of CR in mice in vivo	Could not see clear evidence of CR in mice in vivo	Could not see clear evidence of CR in mice in vivo	Could not see clear evidence of CR in mice in vivo	Could not see clear evidence of CR in mice in vivo	Could not see clear evidence of CR in mice in vivo	Could not see clear evidence of CR in mice in vivo	Could not see clear evidence of CR in mice in vivo	Could not see clear evidence of CR in mice in vivo	Could not see clear evidence of CR in mice in vivo	Could not see clear evidence of CR in mice in vivo
606	Impairment of peripheral circadian clocks precedes metabolic abnormalities in ob/ob mice.	/pubmed/21285316	create date:2011/02/03 | first author:Ando H	2011	Could not see clear evidence of CR in mice in vivo	Could not see clear evidence of CR in mice in vivo	Could not see clear evidence of CR in mice in vivo	Could not see clear evidence of CR in mice in vivo	Could not see clear evidence of CR in mice in vivo	Could not see clear evidence of CR in mice in vivo	Could not see clear evidence of CR in mice in vivo	Could not see clear evidence of CR in mice in vivo	Could not see clear evidence of CR in mice in vivo	Could not see clear evidence of CR in mice in vivo	Could not see clear evidence of CR in mice in vivo	Could not see clear evidence of CR in mice in vivo	Could not see clear evidence of CR in mice in vivo	Could not see clear evidence of CR in mice in vivo	Could not see clear evidence of CR in mice in vivo	Could not see clear evidence of CR in mice in vivo	Could not see clear evidence of CR in mice in vivo	Could not see clear evidence of CR in mice in vivo	Could not see clear evidence of CR in mice in vivo	Could not see clear evidence of CR in mice in vivo	Could not see clear evidence of CR in mice in vivo	Could not see clear evidence of CR in mice in vivo	Could not see clear evidence of CR in mice in vivo	Could not see clear evidence of CR in mice in vivo
612	Alternate day calorie restriction improves systemic inflammation in a mouse model of sepsis induced by cecal ligation and puncture.	/pubmed/21195419	create date:2011/01/05 | first author:Hasegawa A	2011	Could not see clear evidence of CR in mice in vivo	Could not see clear evidence of CR in mice in vivo	Could not see clear evidence of CR in mice in vivo	Could not see clear evidence of CR in mice in vivo	Could not see clear evidence of CR in mice in vivo	Could not see clear evidence of CR in mice in vivo	Could not see clear evidence of CR in mice in vivo	Could not see clear evidence of CR in mice in vivo	Could not see clear evidence of CR in mice in vivo	Could not see clear evidence of CR in mice in vivo	Could not see clear evidence of CR in mice in vivo	Could not see clear evidence of CR in mice in vivo	Could not see clear evidence of CR in mice in vivo	Could not see clear evidence of CR in mice in vivo	Could not see clear evidence of CR in mice in vivo	Could not see clear evidence of CR in mice in vivo	Could not see clear evidence of CR in mice in vivo	Could not see clear evidence of CR in mice in vivo	Could not see clear evidence of CR in mice in vivo	Could not see clear evidence of CR in mice in vivo	Could not see clear evidence of CR in mice in vivo	Could not see clear evidence of CR in mice in vivo	Could not see clear evidence of CR in mice in vivo	Could not see clear evidence of CR in mice in vivo
621	Mindin: a novel marker for podocyte injury in diabetic nephropathy.	/pubmed/21098016	create date:2010/11/26 | first author:Murakoshi M	2010	Could not see clear evidence of CR in mice in vivo	Could not see clear evidence of CR in mice in vivo	Could not see clear evidence of CR in mice in vivo	Could not see clear evidence of CR in mice in vivo	Could not see clear evidence of CR in mice in vivo	Could not see clear evidence of CR in mice in vivo	Could not see clear evidence of CR in mice in vivo	Could not see clear evidence of CR in mice in vivo	Could not see clear evidence of CR in mice in vivo	Could not see clear evidence of CR in mice in vivo	Could not see clear evidence of CR in mice in vivo	Could not see clear evidence of CR in mice in vivo	Could not see clear evidence of CR in mice in vivo	Could not see clear evidence of CR in mice in vivo	Could not see clear evidence of CR in mice in vivo	Could not see clear evidence of CR in mice in vivo	Could not see clear evidence of CR in mice in vivo	Could not see clear evidence of CR in mice in vivo	Could not see clear evidence of CR in mice in vivo	Could not see clear evidence of CR in mice in vivo	Could not see clear evidence of CR in mice in vivo	Could not see clear evidence of CR in mice in vivo	Could not see clear evidence of CR in mice in vivo	Could not see clear evidence of CR in mice in vivo
626	Caloric restriction reduces IgA levels and modifies cytokine mRNA expression in mouse small intestine.	/pubmed/20951020	create date:2010/10/19 | first author:Lara-Padilla E	2010	Could not see clear evidence of CR in mice in vivo	Could not see clear evidence of CR in mice in vivo	Could not see clear evidence of CR in mice in vivo	Could not see clear evidence of CR in mice in vivo	Could not see clear evidence of CR in mice in vivo	Could not see clear evidence of CR in mice in vivo	Could not see clear evidence of CR in mice in vivo	Could not see clear evidence of CR in mice in vivo	Could not see clear evidence of CR in mice in vivo	Could not see clear evidence of CR in mice in vivo	Could not see clear evidence of CR in mice in vivo	Could not see clear evidence of CR in mice in vivo	Could not see clear evidence of CR in mice in vivo	Could not see clear evidence of CR in mice in vivo	Could not see clear evidence of CR in mice in vivo	Could not see clear evidence of CR in mice in vivo	Could not see clear evidence of CR in mice in vivo	Could not see clear evidence of CR in mice in vivo	Could not see clear evidence of CR in mice in vivo	Could not see clear evidence of CR in mice in vivo	Could not see clear evidence of CR in mice in vivo	Could not see clear evidence of CR in mice in vivo	Could not see clear evidence of CR in mice in vivo	Could not see clear evidence of CR in mice in vivo
630	Perspectives on cellular senescence and short term dietary restriction in adults.	/pubmed/20864777	create date:2010/09/25 | first author:Kirkland JL	2010	Could not see clear evidence of CR in mice in vivo	Could not see clear evidence of CR in mice in vivo	Could not see clear evidence of CR in mice in vivo	Could not see clear evidence of CR in mice in vivo	Could not see clear evidence of CR in mice in vivo	Could not see clear evidence of CR in mice in vivo	Could not see clear evidence of CR in mice in vivo	Could not see clear evidence of CR in mice in vivo	Could not see clear evidence of CR in mice in vivo	Could not see clear evidence of CR in mice in vivo	Could not see clear evidence of CR in mice in vivo	Could not see clear evidence of CR in mice in vivo	Could not see clear evidence of CR in mice in vivo	Could not see clear evidence of CR in mice in vivo	Could not see clear evidence of CR in mice in vivo	Could not see clear evidence of CR in mice in vivo	Could not see clear evidence of CR in mice in vivo	Could not see clear evidence of CR in mice in vivo	Could not see clear evidence of CR in mice in vivo	Could not see clear evidence of CR in mice in vivo	Could not see clear evidence of CR in mice in vivo	Could not see clear evidence of CR in mice in vivo	Could not see clear evidence of CR in mice in vivo	Could not see clear evidence of CR in mice in vivo
633	Can autophagy promote longevity?	/pubmed/20811357	create date:2010/09/03 | first author:Madeo F	2010	Could not see clear evidence of CR in mice in vivo	Could not see clear evidence of CR in mice in vivo	Could not see clear evidence of CR in mice in vivo	Could not see clear evidence of CR in mice in vivo	Could not see clear evidence of CR in mice in vivo	Could not see clear evidence of CR in mice in vivo	Could not see clear evidence of CR in mice in vivo	Could not see clear evidence of CR in mice in vivo	Could not see clear evidence of CR in mice in vivo	Could not see clear evidence of CR in mice in vivo	Could not see clear evidence of CR in mice in vivo	Could not see clear evidence of CR in mice in vivo	Could not see clear evidence of CR in mice in vivo	Could not see clear evidence of CR in mice in vivo	Could not see clear evidence of CR in mice in vivo	Could not see clear evidence of CR in mice in vivo	Could not see clear evidence of CR in mice in vivo	Could not see clear evidence of CR in mice in vivo	Could not see clear evidence of CR in mice in vivo	Could not see clear evidence of CR in mice in vivo	Could not see clear evidence of CR in mice in vivo	Could not see clear evidence of CR in mice in vivo	Could not see clear evidence of CR in mice in vivo	Could not see clear evidence of CR in mice in vivo
634	Effect of intermittent fasting on prostate cancer tumor growth in a mouse model.	/pubmed/20733612	create date:2010/08/25 | first author:Thomas JA 2nd	2010	Could not see clear evidence of CR in mice in vivo	Could not see clear evidence of CR in mice in vivo	Could not see clear evidence of CR in mice in vivo	Could not see clear evidence of CR in mice in vivo	Could not see clear evidence of CR in mice in vivo	Could not see clear evidence of CR in mice in vivo	Could not see clear evidence of CR in mice in vivo	Could not see clear evidence of CR in mice in vivo	Could not see clear evidence of CR in mice in vivo	Could not see clear evidence of CR in mice in vivo	Could not see clear evidence of CR in mice in vivo	Could not see clear evidence of CR in mice in vivo	Could not see clear evidence of CR in mice in vivo	Could not see clear evidence of CR in mice in vivo	Could not see clear evidence of CR in mice in vivo	Could not see clear evidence of CR in mice in vivo	Could not see clear evidence of CR in mice in vivo	Could not see clear evidence of CR in mice in vivo	Could not see clear evidence of CR in mice in vivo	Could not see clear evidence of CR in mice in vivo	Could not see clear evidence of CR in mice in vivo	Could not see clear evidence of CR in mice in vivo	Could not see clear evidence of CR in mice in vivo	Could not see clear evidence of CR in mice in vivo
635	Long-term restricted feeding alters circadian expression and reduces the level of inflammatory and disease markers.	/pubmed/20731750	create date:2010/08/25 | first author:Sherman H	2010	Could not see clear evidence of CR in mice in vivo	Could not see clear evidence of CR in mice in vivo	Could not see clear evidence of CR in mice in vivo	Could not see clear evidence of CR in mice in vivo	Could not see clear evidence of CR in mice in vivo	Could not see clear evidence of CR in mice in vivo	Could not see clear evidence of CR in mice in vivo	Could not see clear evidence of CR in mice in vivo	Could not see clear evidence of CR in mice in vivo	Could not see clear evidence of CR in mice in vivo	Could not see clear evidence of CR in mice in vivo	Could not see clear evidence of CR in mice in vivo	Could not see clear evidence of CR in mice in vivo	Could not see clear evidence of CR in mice in vivo	Could not see clear evidence of CR in mice in vivo	Could not see clear evidence of CR in mice in vivo	Could not see clear evidence of CR in mice in vivo	Could not see clear evidence of CR in mice in vivo	Could not see clear evidence of CR in mice in vivo	Could not see clear evidence of CR in mice in vivo	Could not see clear evidence of CR in mice in vivo	Could not see clear evidence of CR in mice in vivo	Could not see clear evidence of CR in mice in vivo	Could not see clear evidence of CR in mice in vivo
638	Controlling SIRT1 expression by microRNAs in health and metabolic disease.	/pubmed/20689156	create date:2010/08/07 | first author:Lee J	2010	Could not see clear evidence of CR in mice in vivo	Could not see clear evidence of CR in mice in vivo	Could not see clear evidence of CR in mice in vivo	Could not see clear evidence of CR in mice in vivo	Could not see clear evidence of CR in mice in vivo	Could not see clear evidence of CR in mice in vivo	Could not see clear evidence of CR in mice in vivo	Could not see clear evidence of CR in mice in vivo	Could not see clear evidence of CR in mice in vivo	Could not see clear evidence of CR in mice in vivo	Could not see clear evidence of CR in mice in vivo	Could not see clear evidence of CR in mice in vivo	Could not see clear evidence of CR in mice in vivo	Could not see clear evidence of CR in mice in vivo	Could not see clear evidence of CR in mice in vivo	Could not see clear evidence of CR in mice in vivo	Could not see clear evidence of CR in mice in vivo	Could not see clear evidence of CR in mice in vivo	Could not see clear evidence of CR in mice in vivo	Could not see clear evidence of CR in mice in vivo	Could not see clear evidence of CR in mice in vivo	Could not see clear evidence of CR in mice in vivo	Could not see clear evidence of CR in mice in vivo	Could not see clear evidence of CR in mice in vivo
639	P66SHC and ageing: ROS and TOR?	/pubmed/20689155	create date:2010/08/07 | first author:Pani G	2010	Could not see clear evidence of CR in mice in vivo	Could not see clear evidence of CR in mice in vivo	Could not see clear evidence of CR in mice in vivo	Could not see clear evidence of CR in mice in vivo	Could not see clear evidence of CR in mice in vivo	Could not see clear evidence of CR in mice in vivo	Could not see clear evidence of CR in mice in vivo	Could not see clear evidence of CR in mice in vivo	Could not see clear evidence of CR in mice in vivo	Could not see clear evidence of CR in mice in vivo	Could not see clear evidence of CR in mice in vivo	Could not see clear evidence of CR in mice in vivo	Could not see clear evidence of CR in mice in vivo	Could not see clear evidence of CR in mice in vivo	Could not see clear evidence of CR in mice in vivo	Could not see clear evidence of CR in mice in vivo	Could not see clear evidence of CR in mice in vivo	Could not see clear evidence of CR in mice in vivo	Could not see clear evidence of CR in mice in vivo	Could not see clear evidence of CR in mice in vivo	Could not see clear evidence of CR in mice in vivo	Could not see clear evidence of CR in mice in vivo	Could not see clear evidence of CR in mice in vivo	Could not see clear evidence of CR in mice in vivo
644	Impacts of dietary selenium deficiency on metabolic phenotypes of diet-restricted GPX1-overexpressing mice.	/pubmed/20578960	create date:2010/06/29 | first author:Pepper MP	2010	Could not see clear evidence of CR in mice in vivo	Could not see clear evidence of CR in mice in vivo	Could not see clear evidence of CR in mice in vivo	Could not see clear evidence of CR in mice in vivo	Could not see clear evidence of CR in mice in vivo	Could not see clear evidence of CR in mice in vivo	Could not see clear evidence of CR in mice in vivo	Could not see clear evidence of CR in mice in vivo	Could not see clear evidence of CR in mice in vivo	Could not see clear evidence of CR in mice in vivo	Could not see clear evidence of CR in mice in vivo	Could not see clear evidence of CR in mice in vivo	Could not see clear evidence of CR in mice in vivo	Could not see clear evidence of CR in mice in vivo	Could not see clear evidence of CR in mice in vivo	Could not see clear evidence of CR in mice in vivo	Could not see clear evidence of CR in mice in vivo	Could not see clear evidence of CR in mice in vivo	Could not see clear evidence of CR in mice in vivo	Could not see clear evidence of CR in mice in vivo	Could not see clear evidence of CR in mice in vivo	Could not see clear evidence of CR in mice in vivo	Could not see clear evidence of CR in mice in vivo	Could not see clear evidence of CR in mice in vivo
645	Short-term fasting induces profound neuronal autophagy.	/pubmed/20534972	create date:2010/06/11 | first author:Alirezaei M	2010	Could not see clear evidence of CR in mice in vivo	Could not see clear evidence of CR in mice in vivo	Could not see clear evidence of CR in mice in vivo	Could not see clear evidence of CR in mice in vivo	Could not see clear evidence of CR in mice in vivo	Could not see clear evidence of CR in mice in vivo	Could not see clear evidence of CR in mice in vivo	Could not see clear evidence of CR in mice in vivo	Could not see clear evidence of CR in mice in vivo	Could not see clear evidence of CR in mice in vivo	Could not see clear evidence of CR in mice in vivo	Could not see clear evidence of CR in mice in vivo	Could not see clear evidence of CR in mice in vivo	Could not see clear evidence of CR in mice in vivo	Could not see clear evidence of CR in mice in vivo	Could not see clear evidence of CR in mice in vivo	Could not see clear evidence of CR in mice in vivo	Could not see clear evidence of CR in mice in vivo	Could not see clear evidence of CR in mice in vivo	Could not see clear evidence of CR in mice in vivo	Could not see clear evidence of CR in mice in vivo	Could not see clear evidence of CR in mice in vivo	Could not see clear evidence of CR in mice in vivo	Could not see clear evidence of CR in mice in vivo
648	Commonly adopted caloric restriction protocols often involve malnutrition.	/pubmed/20493280	create date:2010/05/25 | first author:Cerqueira FM	2010	Could not see clear evidence of CR in mice in vivo	Could not see clear evidence of CR in mice in vivo	Could not see clear evidence of CR in mice in vivo	Could not see clear evidence of CR in mice in vivo	Could not see clear evidence of CR in mice in vivo	Could not see clear evidence of CR in mice in vivo	Could not see clear evidence of CR in mice in vivo	Could not see clear evidence of CR in mice in vivo	Could not see clear evidence of CR in mice in vivo	Could not see clear evidence of CR in mice in vivo	Could not see clear evidence of CR in mice in vivo	Could not see clear evidence of CR in mice in vivo	Could not see clear evidence of CR in mice in vivo	Could not see clear evidence of CR in mice in vivo	Could not see clear evidence of CR in mice in vivo	Could not see clear evidence of CR in mice in vivo	Could not see clear evidence of CR in mice in vivo	Could not see clear evidence of CR in mice in vivo	Could not see clear evidence of CR in mice in vivo	Could not see clear evidence of CR in mice in vivo	Could not see clear evidence of CR in mice in vivo	Could not see clear evidence of CR in mice in vivo	Could not see clear evidence of CR in mice in vivo	Could not see clear evidence of CR in mice in vivo
651	Maternal high fat feeding and gestational dietary restriction: effects on offspring body weight, food intake and hypothalamic gene expression over three generations in mice.	/pubmed/20430050	create date:2010/05/01 | first author:Giraudo SQ	2010	Could not see clear evidence of CR in mice in vivo	Could not see clear evidence of CR in mice in vivo	Could not see clear evidence of CR in mice in vivo	Could not see clear evidence of CR in mice in vivo	Could not see clear evidence of CR in mice in vivo	Could not see clear evidence of CR in mice in vivo	Could not see clear evidence of CR in mice in vivo	Could not see clear evidence of CR in mice in vivo	Could not see clear evidence of CR in mice in vivo	Could not see clear evidence of CR in mice in vivo	Could not see clear evidence of CR in mice in vivo	Could not see clear evidence of CR in mice in vivo	Could not see clear evidence of CR in mice in vivo	Could not see clear evidence of CR in mice in vivo	Could not see clear evidence of CR in mice in vivo	Could not see clear evidence of CR in mice in vivo	Could not see clear evidence of CR in mice in vivo	Could not see clear evidence of CR in mice in vivo	Could not see clear evidence of CR in mice in vivo	Could not see clear evidence of CR in mice in vivo	Could not see clear evidence of CR in mice in vivo	Could not see clear evidence of CR in mice in vivo	Could not see clear evidence of CR in mice in vivo	Could not see clear evidence of CR in mice in vivo
652	Maternal dietary restriction during lactation influences postnatal growth and behavior in the offspring of mice.	/pubmed/20399822	create date:2010/04/20 | first author:Kumon M	2010	Could not see clear evidence of CR in mice in vivo	Could not see clear evidence of CR in mice in vivo	Could not see clear evidence of CR in mice in vivo	Could not see clear evidence of CR in mice in vivo	Could not see clear evidence of CR in mice in vivo	Could not see clear evidence of CR in mice in vivo	Could not see clear evidence of CR in mice in vivo	Could not see clear evidence of CR in mice in vivo	Could not see clear evidence of CR in mice in vivo	Could not see clear evidence of CR in mice in vivo	Could not see clear evidence of CR in mice in vivo	Could not see clear evidence of CR in mice in vivo	Could not see clear evidence of CR in mice in vivo	Could not see clear evidence of CR in mice in vivo	Could not see clear evidence of CR in mice in vivo	Could not see clear evidence of CR in mice in vivo	Could not see clear evidence of CR in mice in vivo	Could not see clear evidence of CR in mice in vivo	Could not see clear evidence of CR in mice in vivo	Could not see clear evidence of CR in mice in vivo	Could not see clear evidence of CR in mice in vivo	Could not see clear evidence of CR in mice in vivo	Could not see clear evidence of CR in mice in vivo	Could not see clear evidence of CR in mice in vivo
654	The role of Sirt1 in renal rejuvenation and resistance to stress.	/pubmed/20335654	create date:2010/03/26 | first author:Nath KA	2010	Could not see clear evidence of CR in mice in vivo	Could not see clear evidence of CR in mice in vivo	Could not see clear evidence of CR in mice in vivo	Could not see clear evidence of CR in mice in vivo	Could not see clear evidence of CR in mice in vivo	Could not see clear evidence of CR in mice in vivo	Could not see clear evidence of CR in mice in vivo	Could not see clear evidence of CR in mice in vivo	Could not see clear evidence of CR in mice in vivo	Could not see clear evidence of CR in mice in vivo	Could not see clear evidence of CR in mice in vivo	Could not see clear evidence of CR in mice in vivo	Could not see clear evidence of CR in mice in vivo	Could not see clear evidence of CR in mice in vivo	Could not see clear evidence of CR in mice in vivo	Could not see clear evidence of CR in mice in vivo	Could not see clear evidence of CR in mice in vivo	Could not see clear evidence of CR in mice in vivo	Could not see clear evidence of CR in mice in vivo	Could not see clear evidence of CR in mice in vivo	Could not see clear evidence of CR in mice in vivo	Could not see clear evidence of CR in mice in vivo	Could not see clear evidence of CR in mice in vivo	Could not see clear evidence of CR in mice in vivo
660	Loss of the actin remodeler Eps8 causes intestinal defects and improved metabolic status in mice.	/pubmed/20209148	create date:2010/03/09 | first author:Tocchetti A	2010	Could not see clear evidence of CR in mice in vivo	Could not see clear evidence of CR in mice in vivo	Could not see clear evidence of CR in mice in vivo	Could not see clear evidence of CR in mice in vivo	Could not see clear evidence of CR in mice in vivo	Could not see clear evidence of CR in mice in vivo	Could not see clear evidence of CR in mice in vivo	Could not see clear evidence of CR in mice in vivo	Could not see clear evidence of CR in mice in vivo	Could not see clear evidence of CR in mice in vivo	Could not see clear evidence of CR in mice in vivo	Could not see clear evidence of CR in mice in vivo	Could not see clear evidence of CR in mice in vivo	Could not see clear evidence of CR in mice in vivo	Could not see clear evidence of CR in mice in vivo	Could not see clear evidence of CR in mice in vivo	Could not see clear evidence of CR in mice in vivo	Could not see clear evidence of CR in mice in vivo	Could not see clear evidence of CR in mice in vivo	Could not see clear evidence of CR in mice in vivo	Could not see clear evidence of CR in mice in vivo	Could not see clear evidence of CR in mice in vivo	Could not see clear evidence of CR in mice in vivo	Could not see clear evidence of CR in mice in vivo
663	SIRT3 regulates mitochondrial fatty-acid oxidation by reversible enzyme deacetylation.	/pubmed/20203611	create date:2010/03/06 | first author:Hirschey MD	2010	Could not see clear evidence of CR in mice in vivo	Could not see clear evidence of CR in mice in vivo	Could not see clear evidence of CR in mice in vivo	Could not see clear evidence of CR in mice in vivo	Could not see clear evidence of CR in mice in vivo	Could not see clear evidence of CR in mice in vivo	Could not see clear evidence of CR in mice in vivo	Could not see clear evidence of CR in mice in vivo	Could not see clear evidence of CR in mice in vivo	Could not see clear evidence of CR in mice in vivo	Could not see clear evidence of CR in mice in vivo	Could not see clear evidence of CR in mice in vivo	Could not see clear evidence of CR in mice in vivo	Could not see clear evidence of CR in mice in vivo	Could not see clear evidence of CR in mice in vivo	Could not see clear evidence of CR in mice in vivo	Could not see clear evidence of CR in mice in vivo	Could not see clear evidence of CR in mice in vivo	Could not see clear evidence of CR in mice in vivo	Could not see clear evidence of CR in mice in vivo	Could not see clear evidence of CR in mice in vivo	Could not see clear evidence of CR in mice in vivo	Could not see clear evidence of CR in mice in vivo	Could not see clear evidence of CR in mice in vivo
664	Metabolic syndrome and altered gut microbiota in mice lacking Toll-like receptor 5.	/pubmed/20203013	create date:2010/03/06 | first author:Vijay-Kumar M	2010	Could not see clear evidence of CR in mice in vivo	Could not see clear evidence of CR in mice in vivo	Could not see clear evidence of CR in mice in vivo	Could not see clear evidence of CR in mice in vivo	Could not see clear evidence of CR in mice in vivo	Could not see clear evidence of CR in mice in vivo	Could not see clear evidence of CR in mice in vivo	Could not see clear evidence of CR in mice in vivo	Could not see clear evidence of CR in mice in vivo	Could not see clear evidence of CR in mice in vivo	Could not see clear evidence of CR in mice in vivo	Could not see clear evidence of CR in mice in vivo	Could not see clear evidence of CR in mice in vivo	Could not see clear evidence of CR in mice in vivo	Could not see clear evidence of CR in mice in vivo	Could not see clear evidence of CR in mice in vivo	Could not see clear evidence of CR in mice in vivo	Could not see clear evidence of CR in mice in vivo	Could not see clear evidence of CR in mice in vivo	Could not see clear evidence of CR in mice in vivo	Could not see clear evidence of CR in mice in vivo	Could not see clear evidence of CR in mice in vivo	Could not see clear evidence of CR in mice in vivo	Could not see clear evidence of CR in mice in vivo
666	Control" laboratory rodents are metabolically morbid: why it matters.	/pubmed/20194732	create date:2010/03/03 | first author:Martin B	2010	Could not see clear evidence of CR in mice in vivo	Could not see clear evidence of CR in mice in vivo	Could not see clear evidence of CR in mice in vivo	Could not see clear evidence of CR in mice in vivo	Could not see clear evidence of CR in mice in vivo	Could not see clear evidence of CR in mice in vivo	Could not see clear evidence of CR in mice in vivo	Could not see clear evidence of CR in mice in vivo	Could not see clear evidence of CR in mice in vivo	Could not see clear evidence of CR in mice in vivo	Could not see clear evidence of CR in mice in vivo	Could not see clear evidence of CR in mice in vivo	Could not see clear evidence of CR in mice in vivo	Could not see clear evidence of CR in mice in vivo	Could not see clear evidence of CR in mice in vivo	Could not see clear evidence of CR in mice in vivo	Could not see clear evidence of CR in mice in vivo	Could not see clear evidence of CR in mice in vivo	Could not see clear evidence of CR in mice in vivo	Could not see clear evidence of CR in mice in vivo	Could not see clear evidence of CR in mice in vivo	Could not see clear evidence of CR in mice in vivo	Could not see clear evidence of CR in mice in vivo	Could not see clear evidence of CR in mice in vivo
668	Longevity regulation in flies: a role for p53.	/pubmed/20157591	create date:2010/02/17 | first author:Donehower LA	2010	Could not see clear evidence of CR in mice in vivo	Could not see clear evidence of CR in mice in vivo	Could not see clear evidence of CR in mice in vivo	Could not see clear evidence of CR in mice in vivo	Could not see clear evidence of CR in mice in vivo	Could not see clear evidence of CR in mice in vivo	Could not see clear evidence of CR in mice in vivo	Could not see clear evidence of CR in mice in vivo	Could not see clear evidence of CR in mice in vivo	Could not see clear evidence of CR in mice in vivo	Could not see clear evidence of CR in mice in vivo	Could not see clear evidence of CR in mice in vivo	Could not see clear evidence of CR in mice in vivo	Could not see clear evidence of CR in mice in vivo	Could not see clear evidence of CR in mice in vivo	Could not see clear evidence of CR in mice in vivo	Could not see clear evidence of CR in mice in vivo	Could not see clear evidence of CR in mice in vivo	Could not see clear evidence of CR in mice in vivo	Could not see clear evidence of CR in mice in vivo	Could not see clear evidence of CR in mice in vivo	Could not see clear evidence of CR in mice in vivo	Could not see clear evidence of CR in mice in vivo	Could not see clear evidence of CR in mice in vivo
670	Urea cycle regulation by mitochondrial sirtuin, SIRT5.	/pubmed/20157539	create date:2010/02/17 | first author:Nakagawa T	2010	Could not see clear evidence of CR in mice in vivo	Could not see clear evidence of CR in mice in vivo	Could not see clear evidence of CR in mice in vivo	Could not see clear evidence of CR in mice in vivo	Could not see clear evidence of CR in mice in vivo	Could not see clear evidence of CR in mice in vivo	Could not see clear evidence of CR in mice in vivo	Could not see clear evidence of CR in mice in vivo	Could not see clear evidence of CR in mice in vivo	Could not see clear evidence of CR in mice in vivo	Could not see clear evidence of CR in mice in vivo	Could not see clear evidence of CR in mice in vivo	Could not see clear evidence of CR in mice in vivo	Could not see clear evidence of CR in mice in vivo	Could not see clear evidence of CR in mice in vivo	Could not see clear evidence of CR in mice in vivo	Could not see clear evidence of CR in mice in vivo	Could not see clear evidence of CR in mice in vivo	Could not see clear evidence of CR in mice in vivo	Could not see clear evidence of CR in mice in vivo	Could not see clear evidence of CR in mice in vivo	Could not see clear evidence of CR in mice in vivo	Could not see clear evidence of CR in mice in vivo	Could not see clear evidence of CR in mice in vivo
671	Genes and behavior interact to determine mortality in mice when food is scarce and competition fierce.	/pubmed/20156203	create date:2010/02/17 | first author:Mattson MP	2010	Could not see clear evidence of CR in mice in vivo	Could not see clear evidence of CR in mice in vivo	Could not see clear evidence of CR in mice in vivo	Could not see clear evidence of CR in mice in vivo	Could not see clear evidence of CR in mice in vivo	Could not see clear evidence of CR in mice in vivo	Could not see clear evidence of CR in mice in vivo	Could not see clear evidence of CR in mice in vivo	Could not see clear evidence of CR in mice in vivo	Could not see clear evidence of CR in mice in vivo	Could not see clear evidence of CR in mice in vivo	Could not see clear evidence of CR in mice in vivo	Could not see clear evidence of CR in mice in vivo	Could not see clear evidence of CR in mice in vivo	Could not see clear evidence of CR in mice in vivo	Could not see clear evidence of CR in mice in vivo	Could not see clear evidence of CR in mice in vivo	Could not see clear evidence of CR in mice in vivo	Could not see clear evidence of CR in mice in vivo	Could not see clear evidence of CR in mice in vivo	Could not see clear evidence of CR in mice in vivo	Could not see clear evidence of CR in mice in vivo	Could not see clear evidence of CR in mice in vivo	Could not see clear evidence of CR in mice in vivo
673	dSir2 and fly mobility.	/pubmed/20107322	create date:2010/01/29 | first author:Parashar V	2010	Could not see clear evidence of CR in mice in vivo	Could not see clear evidence of CR in mice in vivo	Could not see clear evidence of CR in mice in vivo	Could not see clear evidence of CR in mice in vivo	Could not see clear evidence of CR in mice in vivo	Could not see clear evidence of CR in mice in vivo	Could not see clear evidence of CR in mice in vivo	Could not see clear evidence of CR in mice in vivo	Could not see clear evidence of CR in mice in vivo	Could not see clear evidence of CR in mice in vivo	Could not see clear evidence of CR in mice in vivo	Could not see clear evidence of CR in mice in vivo	Could not see clear evidence of CR in mice in vivo	Could not see clear evidence of CR in mice in vivo	Could not see clear evidence of CR in mice in vivo	Could not see clear evidence of CR in mice in vivo	Could not see clear evidence of CR in mice in vivo	Could not see clear evidence of CR in mice in vivo	Could not see clear evidence of CR in mice in vivo	Could not see clear evidence of CR in mice in vivo	Could not see clear evidence of CR in mice in vivo	Could not see clear evidence of CR in mice in vivo	Could not see clear evidence of CR in mice in vivo	Could not see clear evidence of CR in mice in vivo
675	Effect of intrauterine undernutrition during late gestation on pancreatic beta cell mass.	/pubmed/20051640	create date:2010/01/07 | first author:Inoue T	2010	Could not see clear evidence of CR in mice in vivo	Could not see clear evidence of CR in mice in vivo	Could not see clear evidence of CR in mice in vivo	Could not see clear evidence of CR in mice in vivo	Could not see clear evidence of CR in mice in vivo	Could not see clear evidence of CR in mice in vivo	Could not see clear evidence of CR in mice in vivo	Could not see clear evidence of CR in mice in vivo	Could not see clear evidence of CR in mice in vivo	Could not see clear evidence of CR in mice in vivo	Could not see clear evidence of CR in mice in vivo	Could not see clear evidence of CR in mice in vivo	Could not see clear evidence of CR in mice in vivo	Could not see clear evidence of CR in mice in vivo	Could not see clear evidence of CR in mice in vivo	Could not see clear evidence of CR in mice in vivo	Could not see clear evidence of CR in mice in vivo	Could not see clear evidence of CR in mice in vivo	Could not see clear evidence of CR in mice in vivo	Could not see clear evidence of CR in mice in vivo	Could not see clear evidence of CR in mice in vivo	Could not see clear evidence of CR in mice in vivo	Could not see clear evidence of CR in mice in vivo	Could not see clear evidence of CR in mice in vivo
678	Genes and gene expression modules associated with caloric restriction and aging in the laboratory mouse.	/pubmed/19968875	create date:2009/12/09 | first author:Swindell WR	2009	Could not see clear evidence of CR in mice in vivo	Could not see clear evidence of CR in mice in vivo	Could not see clear evidence of CR in mice in vivo	Could not see clear evidence of CR in mice in vivo	Could not see clear evidence of CR in mice in vivo	Could not see clear evidence of CR in mice in vivo	Could not see clear evidence of CR in mice in vivo	Could not see clear evidence of CR in mice in vivo	Could not see clear evidence of CR in mice in vivo	Could not see clear evidence of CR in mice in vivo	Could not see clear evidence of CR in mice in vivo	Could not see clear evidence of CR in mice in vivo	Could not see clear evidence of CR in mice in vivo	Could not see clear evidence of CR in mice in vivo	Could not see clear evidence of CR in mice in vivo	Could not see clear evidence of CR in mice in vivo	Could not see clear evidence of CR in mice in vivo	Could not see clear evidence of CR in mice in vivo	Could not see clear evidence of CR in mice in vivo	Could not see clear evidence of CR in mice in vivo	Could not see clear evidence of CR in mice in vivo	Could not see clear evidence of CR in mice in vivo	Could not see clear evidence of CR in mice in vivo	Could not see clear evidence of CR in mice in vivo
[truncated: 104 more rows]

## Sheet: Data added
Number assigned	Title	DOI/ URL	Year	Backgroun strain	Males	# Males	Females	# Females	Data combined	Final reduction in calories	Stepwise?	Age beginning diet	Duration	Key findings	Notes
[truncated: 1,141 more rows]

## Sheet: Sorted for obligates
Number assigned	Title	URL	Year	Backgroun strain	Males	# Males	Females	# Females	Data combined
[truncated: 1,130 more rows]

[truncated: 2 more sheets: Not & partial combined for sex , OLD partial Uncombined]
